# Supplementary material for: Two central pattern generators from the crab, Cancer borealis, respond robustly and differentially to extreme extracellular pH
Source: eLife journal article supplement (doi:10.7554/elife.41877), 2018-12-28
Supplement: supp [file elife-41877-supp-v1.zip]

Archive with 35 entries (35 files):
- elife_poa_e41877_Figure_6_source_data_3.csv
- elife_poa_e41877_Figure_3_source_data_7.csv
- elife_poa_e41877_Figure_7_source_data_1.csv
- elife_poa_e41877_Figure_4_source_data_6.csv
- elife_poa_e41877_Figure_8_source_data_1.csv
- elife_poa_e41877_Figure_3_figure_supplement_1.tif
- elife_poa_e41877_Figure_3_source_data_2.csv
- elife_poa_e41877_Figure_4_source_data_3.csv
- elife_poa_e41877_Figure_3_source_data_4.csv
- elife_poa_e41877_Figure_4_figure_supplement_1.tif
- elife_poa_e41877_Figure_2_source_data_3.csv
- elife_poa_e41877_Figure_7_source_data_5.csv
- elife_poa_e41877_Figure_6_source_data_1.csv
- elife_poa_e41877_Figure_7_figure_supplement_2.tif
- elife_poa_e41877_Figure_3_source_data_3.csv
- elife_poa_e41877_Figure_2_source_data_1.csv
- elife_poa_e41877_Figure_7_figure_supplement_1.tif
- elife_poa_e41877_Figure_7_source_data_3.csv
- elife_poa_e41877_Figure_4_source_data_1.csv
- elife_poa_e41877_Figure_6_source_data_2.csv
- elife_poa_e41877_Figure_3_source_data_6.csv
- elife_poa_e41877_Figure_7_source_data_6.csv
- elife_poa_e41877_Figure_4_source_data_2.csv
- elife_poa_e41877_Figure_8_source_data_2.csv
- elife_poa_e41877_Figure_3_source_data_5.csv
- elife_poa_e41877_Figure_4_source_data_5.csv
- elife_poa_e41877_Figure_7_source_data_2.csv
- elife_poa_e41877_Figure_3_figure_supplement_2.tif
- elife_poa_e41877_Figure_2_source_data_2.csv
- elife_poa_e41877_Transparent_Reporting_File.pdf
- elife_poa_e41877_Figure_3_source_data_1.csv
- elife_poa_e41877_Figure_8_figure_supplement_1.tif
- elife_poa_e41877_Figure_4_source_data_4.csv
- elife_poa_e41877_Figure_7_source_data_4.csv
- elife_poa_e41877_Figure_7_source_data_7.csv
