# Supplementary material for: Two central pattern generators from the crab, Cancer borealis, respond robustly and differentially to extreme extracellular pH
Source: eLife journal article supplement (doi:10.7554/elife.41877), 2018-12-28
Supplement: supp [file elife-41877-supp-v1.zip › elife_poa_e41877_Figure_2_source_data_1.csv]

bin	pH78_1	pH55	pH61	pH67	pH72	pH78_2	pH78_3	pH83	pH88	pH93	pH98	pH104	pH78_4
1	1.45278350655259	1.62214521072847	1.4048724334601	1.35108807905712	1.38839253382871	1.35202590690541	1.45278350655259	1.39527698044901	1.4315589918623	1.40103927671313	1.31431590565088	1.21705082121747	1.12275451496122
2	1.45557464425728	1.61751659469128	1.3616921669688	1.31662417245646	1.4295465175443	1.3592059963393	1.45557464425728	1.40527944540967	1.39318452043586	1.37123539644319	1.31192302755187	1.20512699603625	1.12466182817564
3	1.4384864862778	1.57328037806628	1.40222581989725	1.32390356809022	1.40504081030478	1.35212586453555	1.4384864862778	1.38369342021904	1.3991124114882	1.36541598413659	1.31994310115536	1.19943875323104	1.10683746979804
4	1.39057239073089	1.53757153344791	1.33264501519998	1.31938722278641	1.36683674017078	1.34893113378984	1.39057239073089	1.37033935831028	1.38384138448879	1.38689723913521	1.2962196798948	1.20053643043	1.13034253235812
5	1.42374239453828	1.54239582466367	1.35083637973356	1.29708828897391	1.36070142393492	1.34859329518217	1.42374239453828	1.39878074373037	1.37776416758833	1.37856696929288	1.2961488804556	1.20411138574584	1.12590850490703
6	1.41472118046575	1.58510387902384	1.35437657032227	1.29907651954559	1.36558161946513	1.3479677058562	1.41472118046575	1.38464996319424	1.38160067033219	1.37550426372783	1.29828861732137	1.19789949850728	1.12905796823819
7	1.43947581440091	1.54834781503264	1.32587653341129	1.31516985519263	1.32999187560489	1.34871245176755	1.43947581440091	1.36250986870255	1.37538529755568	1.38150064414997	1.30021935347875	1.1904097632843	1.12893435843111
8	1.35573028480386	1.56574029207835	1.37613879514131	1.31018243673377	1.33610342558673	1.34644020715403	1.35573028480386	1.40186174861121	1.36963175074207	1.37725964179261	1.34154696402326	1.22548677601738	1.14555226019962
9	1.37651357145062	1.59327038529349	1.32942791969642	1.32825480360895	1.33928189182759	1.34819813350997	1.37651357145062	1.40121841845251	1.3802119773256	1.37057381603809	1.2854446196517	1.19274334312773	1.11794824215863
10	1.40929851262567	1.57165572221165	1.37196138561156	1.31888249367713	1.26779224105291	1.35090088433689	1.40929851262567	1.38268960507882	1.38862530961969	1.38363190054203	1.28019431461015	1.18139907996456	1.0710509356015
11	1.39936137985162	1.56015225125902	1.37155226749782	1.30159183639535	1.28753248814446	1.35020512942801	1.39936137985162	1.38608178174289	1.37625388149729	1.37237060469773	1.28813995526859	1.19209412547287	1.06166431056634
12	1.37935213404156	1.55115941948478	1.33692885322363	1.30842479415997	1.32028120907248	1.35375748990675	1.37935213404156	1.38597398844332	1.37768758331524	1.37564627160484	1.30941133650858	1.20183848532984	1.02483747406053
13	1.38784707839225	1.5557759676002	1.35054952522273	1.30773414301144	1.34037408575631	1.3536761598761	1.38784707839225	1.36424569365404	1.36751591981454	1.34585045698007	1.31192271077262	1.19581857531253	1.01175595824395
14	1.39047835660832	1.51368397290727	1.3598014764766	1.30948392263355	1.34171035083437	1.34733623920121	1.39047835660832	1.39757909821761	1.37572367776777	1.37126847854031	1.30473397771677	1.19298819209145	1.03907960130643
15	1.42627671692696	1.51864807803489	1.34619023365281	1.31629695311251	1.34614500332117	1.35721966820883	1.42627671692696	1.38149919160443	1.3881848525663	1.36022862322635	1.29389708708413	1.19148783909314	1.08051242337266
16	1.4503075525077	1.59155717363589	1.35200276243094	1.31152275798012	1.35704142238523	1.352740905634	1.4503075525077	1.36813076666728	1.37606940778583	1.35583843289648	1.30225599964322	1.17304572882621	1.06054922022995
17	1.46366243791677	1.56300554700634	1.35495237581634	1.30265612240523	1.35418551052565	1.37015155155417	1.46366243791677	1.39062660055338	1.37773419561589	1.36258439019321	1.32607693625763	1.18468142152802	1.10519929246087
18	1.47506844522417	1.5193385628494	1.3586755574577	1.30676620998698	1.363282921202	1.36943808505512	1.47506844522417	1.38355061777583	1.38686509346743	1.3590743908916	1.32272261139896	1.17622893925157	1.14774655540817
19	1.46358197441903	1.54122321863928	1.3572373138091	1.31914480831096	1.36446676175879	1.37799079741976	1.46358197441903	1.38175401700978	1.37426921637971	1.3634507437125	1.34545950616248	1.18057916327547	1.16027333728526
20	1.48677860926647	1.50908026222203	1.37194778027456	1.30589625659893	1.35202772562126	1.38293021554989	1.48677860926647	1.36884174182202	1.36906944634821	1.34741437274627	1.31989836327461	1.17378787448326	1.20740284054467
21	1.51277071717256	1.55389214861756	1.39200349132196	1.30257253941375	1.36182109427953	1.37555509586051	1.51277071717256	1.38715072487615	1.36879192993619	1.37132030496624	1.33272931627936	1.18358388457298	1.21586308026728
22	1.4874791502118	1.57042635388537	1.36683023960236	1.30493553216917	1.35854094792731	1.36513206305904	1.4874791502118	1.38526627514026	1.37799059652934	1.35770961384064	1.32791868555352	1.19017821504058	1.22739690882268
23	1.46383094476169	1.613122269977	1.37999148510396	1.30441753388299	1.35126619648438	1.36717353908192	1.46383094476169	1.3761791846749	1.3830827212162	1.34525379942055	1.29668690705478	1.17998493629051	1.25792071958156
24	1.44876869080772	1.5651459042624	1.39024859305882	1.30497539058891	1.36013861315652	1.3708894280016	1.44876869080772	1.37053098967875	1.36686066453062	1.35545201266342	1.29535408537015	1.17288461119769	1.26241306026072
25	1.46479315961844	1.54573514951811	1.37730566049661	1.3301558676503	1.35560721655902	1.3651951583848	1.46479315961844	1.38466874955857	1.36682615024088	1.34812293026795	1.30446755592801	1.15972227759605	1.28653478616561
26	1.43495544228956	1.56311303699528	1.40792484621203	1.34115724751987	1.3530744181558	1.37266497022912	1.43495544228956	1.38411880245534	1.3636426780836	1.3345762193313	1.29873307438111	1.15525014793255	1.27480387577779
27	1.44450355204779	1.60839664452769	1.45669364813307	1.37834931564466	1.34662545232103	1.36536804453283	1.44450355204779	1.36219620889173	1.36537889996764	1.36393724418085	1.29643244017955	1.15630261594249	1.29129667942737
28	1.46955440525628	1.60190076325125	1.44881501116706	1.36819407576978	1.35581847113331	1.36091352492885	1.46955440525628	1.37455937207725	1.36017708974016	1.36161279378858	1.32054067286276	1.18004267170484	1.2991267672703
29	1.44830632884369	1.607568452086	1.44009457902131	1.39226353748066	1.3504485731912	1.36554381725614	1.44830632884369	1.36319853346799	1.36332799160573	1.3492242067296	1.32852408821949	1.15764641391872	1.29231358252074
30	1.44653498195259	1.62227358084938	1.4020422073959	1.38852964773473	1.35570815653595	1.3632900540133	1.44653498195259	1.34327208429126	1.35303032776432	1.35188936622413	1.30102234027115	1.16988375232367	1.29025384006904
31	1.43296047522785	1.59702537558353	1.42813003404621	1.41841473489365	1.34447418711196	1.35935297766505	1.43296047522785	1.38648119673421	1.35511190957582	1.36171398152168	1.30446091019535	1.17080286425341	1.30851248826662
32	1.43927927279942	1.63321116326027	1.42249132079845	1.41381646433869	1.34757866707575	1.36304879568383	1.43927927279942	1.38186938156681	1.35070846753303	1.30600633501094	1.28781375688949	1.17400924133022	1.3119460156972
33	1.42656996291729	1.65915208832139	1.49139238989563	1.42812297844199	1.34714354516535	1.36389557148298	1.42656996291729	1.36931338832734	1.36942696201236	1.33731077251985	1.30029729748629	1.16015226352801	1.31472323109775
34	1.43436851664291	1.66917629401804	1.41538949899393	1.42911809985041	1.34292759074519	1.3624324731288	1.43436851664291	1.37530718727792	1.36003439292643	1.34726461771968	1.30315325827078	1.16289236843192	1.34394104860539
35	1.42680411080737	1.67819557881922	1.45170534082992	1.40771041261204	1.33491486563125	1.37154698277521	1.42680411080737	1.35196815038193	1.34752497427621	1.28734973835708	1.27695110858202	1.16940893912941	1.3347568527995
36	1.43326535029741	1.71344897045238	1.42865942779936	1.43207813956335	1.33889806293897	1.36762526746459	1.43326535029741	1.38845051709435	1.35475823893303	1.326529447489	1.29931623906794	1.15302569753438	1.31371279270808
37	1.41780025948141	1.68378363310138	1.42328504335013	1.42752990026224	1.33900193370704	1.36445662064788	1.41780025948141	1.38425299999469	1.36117036382736	1.31712054146805	1.29469868034619	1.14649388576739	1.33007249477844
38	1.43496091790723	1.69922237976457	1.43495075147439	1.43086357395712	1.3366582405521	1.3571439432456	1.43496091790723	1.36828251406433	1.34984650137525	1.28707621528241	1.27659380978142	1.16102837953945	1.34142624693349
39	1.43618562282318	1.70677410400097	1.42127836178106	1.43674512579346	1.33676062923906	1.3595887194806	1.43618562282318	1.36565230645048	1.3567178256088	1.32664747056625	1.27938869370718	1.1549410919216	1.33763672101052
40	1.41877725366362	1.69211661339681	1.42076307052824	1.44192423425195	1.33471623218928	1.35592886367785	1.41877725366362	1.36012066897759	1.36120795265249	1.28073779185106	1.27088290494911	1.15571430215609	1.33121314373299
41	1.42044284564762	1.68726810000131	1.43765930340199	1.44161000236992	1.33187372204081	1.35034618009501	1.42044284564762	1.37533915857375	1.35609141021822	1.29872098078778	1.26667498761629	1.16680907991938	1.32500732368169
42	1.42571295059431	1.71230068751542	1.44549950646344	1.43978290821539	1.33996521882776	1.36112184618934	1.42571295059431	1.36994612863202	1.36451885309118	1.29925193734435	1.2754167576852	1.15753041951564	1.34380835855457
43	1.44617018592429	1.69305650836035	1.45127656225584	1.45904976621706	1.33229863991583	1.36045467077624	1.44617018592429	1.36670533662637	1.36325731819378	1.28742060528546	1.26238972619197	1.15358479953613	1.33453305639637
44	1.44884678543218	1.65934618577796	1.48157348040103	1.45072282470349	1.33312414897784	1.36952244401898	1.44884678543218	1.36324336106565	1.36268547456454	1.33027526589455	1.26890343382544	1.14469236636442	1.31438095038998
45	1.45607365075864	1.70525324591938	1.50986757097401	1.46196713410722	1.32549718589681	1.36812819641514	1.45607365075864	1.34856111205503	1.38443899893697	1.25710667462229	1.24743689657435	1.14879304892063	1.32504269348812
46	1.44759989911648	1.68637977682672	1.48826190609516	1.44025492578501	1.33529704139237	1.36719586001059	1.44759989911648	1.36914455762551	1.34873329953291	1.27005123310164	1.25857075259998	1.18230468414715	1.30808963333922
47	1.45201813179536	1.67010223545128	1.49616524201363	1.43458346634857	1.33233164296161	1.36672291440564	1.45201813179536	1.38154634862088	1.35995937340667	1.29714759134689	1.24594382685447	1.16208665718528	1.30151917801807
48	1.4768072439273	1.67972847008434	1.53614675271715	1.44401764754783	1.33027093265485	1.36148728520513	1.4768072439273	1.37556819007041	1.36973861509745	1.24240734369209	1.24186223886289	1.22159323151812	1.33008529180948
