# Supplementary material for: Two central pattern generators from the crab, Cancer borealis, respond robustly and differentially to extreme extracellular pH
Source: eLife journal article supplement (doi:10.7554/elife.41877), 2018-12-28
Supplement: supp [file elife-41877-supp-v1.zip › elife_poa_e41877_Figure_2_source_data_2.csv]

bin	pH78_1	pH55	pH61	pH67	pH72	pH78_2	pH78_3	pH83	pH88	pH93	pH98	pH104	pH78_4
1	1.94166666666667	2.80882352941176	2.99107142857143	2.875	2.59821428571429	2.66964285714286	1.94166666666667	3.14285714285714	2.93333333333333	2.99107142857143	3.24107142857143	3.14423076923077	3.25
2	1.73214285714286	3	3.10714285714286	2.75	2.425	2.57142857142857	1.73214285714286	3.1875	3.04464285714286	2.94642857142857	3.35576923076923	2.85416666666667	3.125
3	1.9	2.6328125	3.07142857142857	2.82692307692308	2.63392857142857	2.5	1.9	3.14285714285714	3.17857142857143	3	3.50961538461538	3.11458333333333	3.01136363636364
4	1.58928571428571	2.31666666666667	3.03846153846154	2.95535714285714	2.59615384615385	2.51785714285714	1.58928571428571	3.14285714285714	3.17857142857143	2.92857142857143	3.05769230769231	3.02083333333333	3.30681818181818
5	1.8125	2.725	3.125	2.76923076923077	2.69642857142857	2.51923076923077	1.8125	3.23214285714286	3.125	2.98076923076923	3.32692307692308	3.125	3.33333333333333
6	1.70535714285714	2.8515625	2.94230769230769	2.82692307692308	2.66071428571429	2.59821428571429	1.70535714285714	3.23214285714286	3.19642857142857	3.03571428571429	3.43269230769231	3.01041666666667	3.47727272727273
7	1.98214285714286	2.6953125	2.875	2.75	2.78846153846154	2.63461538461538	1.98214285714286	2.96153846153846	3.00892857142857	3.04464285714286	3.75961538461538	2.95454545454545	3.19318181818182
8	1.85714285714286	2.575	3.14423076923077	2.58653846153846	2.50961538461538	2.58928571428571	1.85714285714286	3.125	3.04464285714286	2.94642857142857	3.70192307692308	3.15384615384615	3.3125
9	1.78571428571429	2.7890625	2.99107142857143	2.71153846153846	2.75	2.61538461538462	1.78571428571429	3.19642857142857	3.09615384615385	3.02678571428571	3.50961538461538	3.05208333333333	3.44318181818182
10	1.72321428571429	2.7734375	2.85576923076923	2.79807692307692	2.52083333333333	2.63392857142857	1.72321428571429	3.20535714285714	3.125	2.93269230769231	3.60576923076923	3.23863636363636	3.725
11	1.78571428571429	2.734375	3.00892857142857	2.83653846153846	2.71153846153846	2.47115384615385	1.78571428571429	3.19642857142857	3.14285714285714	2.86607142857143	3.36538461538462	3.02083333333333	3.89772727272727
12	1.77884615384615	2.73333333333333	3.08653846153846	2.75961538461538	2.74038461538462	2.55357142857143	1.77884615384615	3.25892857142857	2.99107142857143	3.24107142857143	3.70192307692308	3.34375	3.9375
13	2.07142857142857	2.859375	2.9375	2.71153846153846	2.73214285714286	2.54807692307692	2.07142857142857	3.16071428571429	3.05769230769231	3.04807692307692	3.61538461538462	3.17708333333333	3.825
14	1.74107142857143	2.58333333333333	3.01785714285714	2.69642857142857	2.68269230769231	2.54464285714286	1.74107142857143	3.21428571428571	3.25	2.85714285714286	3.38461538461538	3.01041666666667	3.82954545454545
15	1.83928571428571	2.475	2.80769230769231	2.65384615384615	2.53571428571429	2.44230769230769	1.83928571428571	3.07692307692308	2.83035714285714	3.01785714285714	3.57692307692308	3.05208333333333	3.73863636363636
16	1.85	2.796875	3.00892857142857	2.89423076923077	2.56730769230769	2.51785714285714	1.85	3.1875	2.91964285714286	2.90384615384615	3.41346153846154	3.07291666666667	4.0625
17	2.23214285714286	2.54166666666667	2.91346153846154	2.75961538461538	2.55357142857143	2.53846153846154	2.23214285714286	3.23214285714286	3.03571428571429	3.03571428571429	3.58653846153846	3.08333333333333	3.68181818181818
18	2.29166666666667	2.4296875	2.71428571428571	2.61538461538462	2.51785714285714	2.49107142857143	2.29166666666667	3.24107142857143	2.94642857142857	3.20192307692308	3.86538461538462	3.10227272727273	3.90625
19	2.3	2.59166666666667	2.70192307692308	2.83653846153846	2.66346153846154	2.60714285714286	2.3	3.1875	3.27884615384615	3.15178571428571	3.75	2.97916666666667	3.76136363636364
20	2.04166666666667	2.48333333333333	2.625	2.97115384615385	2.66071428571429	2.57142857142857	2.04166666666667	3.19230769230769	3.16071428571429	3.03846153846154	3.5	2.8125	3.79807692307692
21	2.15	2.546875	2.98214285714286	2.96153846153846	2.61538461538462	2.38461538461538	2.15	2.92857142857143	3.03571428571429	2.875	3.73076923076923	3.11458333333333	3.60416666666667
22	2.23333333333333	2.45833333333333	3	2.80769230769231	2.64285714285714	2.50892857142857	2.23333333333333	3.10714285714286	3.07692307692308	3.02678571428571	3.5625	2.94791666666667	3.71875
23	2.375	2.8125	2.85576923076923	2.73076923076923	2.75961538461538	2.65178571428571	2.375	3.16071428571429	3	2.98076923076923	3.64423076923077	3.11458333333333	3.70833333333333
24	2.23333333333333	2.546875	3.08035714285714	2.91346153846154	2.50892857142857	2.57692307692308	2.23333333333333	3.24107142857143	3.10714285714286	2.83928571428571	3.47115384615385	2.80681818181818	3.625
25	2.26785714285714	2.4453125	3.04464285714286	2.99107142857143	2.65178571428571	2.48214285714286	2.26785714285714	3.24038461538462	2.96428571428571	2.95192307692308	3.34615384615385	2.88541666666667	3.83653846153846
26	2.23333333333333	2.425	3.13392857142857	2.72115384615385	2.56730769230769	2.5625	2.23333333333333	3.0625	3.14423076923077	3.01785714285714	3.51923076923077	3.31818181818182	3.91346153846154
27	2.42857142857143	2.703125	3.24166666666667	2.875	2.57142857142857	2.625	2.42857142857143	3.14285714285714	3.22321428571429	3.06730769230769	3.47115384615385	2.88541666666667	3.89423076923077
28	2.21666666666667	2.3828125	3.23214285714286	2.97115384615385	2.73076923076923	2.54464285714286	2.21666666666667	3.23214285714286	3.01923076923077	2.89285714285714	3.49038461538462	2.84375	3.88461538461538
29	2.40178571428571	2.5703125	3.21666666666667	3	2.60714285714286	2.55357142857143	2.40178571428571	3.22115384615385	3.04464285714286	3.03846153846154	3.51923076923077	3.09090909090909	3.65384615384615
30	2.36666666666667	2.50735294117647	2.91964285714286	2.92857142857143	2.70192307692308	2.71153846153846	2.36666666666667	3.15178571428571	3.14285714285714	3.07142857142857	3.46153846153846	3.01041666666667	3.63541666666667
31	2.41071428571429	2.34166666666667	2.83035714285714	3.1875	2.55357142857143	2.55357142857143	2.41071428571429	3.125	3.17307692307692	3.24038461538462	3.56730769230769	3.14583333333333	3.64285714285714
32	2.40178571428571	2.19117647058824	2.75	2.98333333333333	2.60576923076923	2.66071428571429	2.40178571428571	3.21428571428571	3.15178571428571	3.00961538461538	3.625	2.96875	3.85576923076923
33	2.60833333333333	2.171875	2.83333333333333	2.92857142857143	2.66964285714286	2.59615384615385	2.60833333333333	3.09821428571429	3.13461538461538	3.09821428571429	3.36538461538462	2.97727272727273	3.69230769230769
34	2.45535714285714	2.22058823529412	2.83035714285714	3.0625	2.63461538461538	2.57142857142857	2.45535714285714	3.08928571428571	3.01785714285714	3.05769230769231	3.47115384615385	3.14583333333333	3.61538461538462
35	2.59821428571429	2.08088235294118	2.69166666666667	3.00892857142857	2.76923076923077	2.44642857142857	2.59821428571429	3.44230769230769	3.06730769230769	3.23076923076923	3.46153846153846	3.20454545454545	3.8125
36	2.425	2.05147058823529	2.71428571428571	2.95	2.625	2.70192307692308	2.425	2.96428571428571	3.0625	3.03846153846154	3.33653846153846	3.14583333333333	3.80769230769231
37	2.89285714285714	2.16911764705882	2.42857142857143	3.01785714285714	2.65384615384615	2.59821428571429	2.89285714285714	3	3.14285714285714	3.14285714285714	3.53846153846154	3.01136363636364	3.60576923076923
38	2.5	2.05882352941176	2.58333333333333	3.10714285714286	2.66346153846154	2.48076923076923	2.5	3.22321428571429	3.20192307692308	3.16666666666667	3.42708333333333	3.25	3.42307692307692
39	2.58035714285714	1.96323529411765	2.34821428571429	2.88392857142857	2.76785714285714	2.48214285714286	2.58035714285714	3.05769230769231	3.05357142857143	3.16964285714286	3.47115384615385	3.03125	3.58928571428571
40	2.61666666666667	1.79411764705882	2.47321428571429	3.01666666666667	2.80769230769231	2.44642857142857	2.61666666666667	3.35714285714286	3.11538461538462	3.20833333333333	3.31730769230769	3.18181818181818	3.48076923076923
41	2.29464285714286	2.02205882352941	2.57142857142857	3.01785714285714	2.77884615384615	2.47115384615385	2.29464285714286	3.03571428571429	3.16071428571429	3.18269230769231	3.41346153846154	3.16666666666667	3.55769230769231
42	2.47321428571429	2.04411764705882	2.55833333333333	2.95	2.78571428571429	2.66964285714286	2.47321428571429	3.125	3.08653846153846	3.00961538461538	3.23958333333333	2.875	3.5625
43	2.825	1.90441176470588	2.85714285714286	3.20535714285714	2.81730769230769	2.52884615384615	2.825	2.99107142857143	3.0625	3.39423076923077	3.11538461538462	2.86458333333333	3.54807692307692
44	2.44642857142857	1.9921875	3.01666666666667	2.9	2.84821428571429	2.58928571428571	2.44642857142857	3.13392857142857	3.10714285714286	3.26785714285714	3.20192307692308	3.03409090909091	3.24038461538462
45	2.51666666666667	2.11764705882353	3.05	2.98214285714286	3.06730769230769	2.58035714285714	2.51666666666667	3.17307692307692	2.98214285714286	3.21875	3.19791666666667	2.83333333333333	3.32692307692308
46	2.66071428571429	1.97794117647059	2.99166666666667	3.00833333333333	2.77884615384615	2.50961538461538	2.66071428571429	3.0625	3.11538461538462	3.33653846153846	3.32692307692308	3.1875	3.15178571428571
47	2.475	2.00735294117647	3.05	2.85714285714286	2.80769230769231	2.66964285714286	2.475	3.125	3.10714285714286	3.30769230769231	2.98958333333333	3.02272727272727	3.14423076923077
48	2.41071428571429	1.95588235294118	3.19166666666667	3.00833333333333	2.82142857142857	2.72321428571429	2.41071428571429	3.25	3.03846153846154	3.3125	3.30769230769231	3.60416666666667	3.38461538461538
