# Supplementary material for: Two central pattern generators from the crab, Cancer borealis, respond robustly and differentially to extreme extracellular pH
Source: eLife journal article supplement (doi:10.7554/elife.41877), 2018-12-28
Supplement: supp [file elife-41877-supp-v1.zip › elife_poa_e41877_Figure_2_source_data_3.csv]

bin	pH78_1	pH55	pH61	pH67	pH72	pH78_2	pH78_3	pH83	pH88	pH93	pH98	pH104	pH78_4
1	0.186441610092453	0.273169455851347	0.242736511314893	0.250254762319483	0.232613274038724	0.225555527495885	0.186441610092453	0.251263612242543	0.25042245857674	0.225435707854723	0.223009646649569	0.206280019641969	0.198517581218712
2	0.171749084971845	0.2723698120274	0.243508543856146	0.252883035733931	0.225656785031937	0.221567676273336	0.171749084971845	0.259262767363455	0.244724155881175	0.219985903943731	0.211644001937735	0.195611743985741	0.196522253561057
3	0.211595236108739	0.265095023142111	0.255635636839975	0.251600829915441	0.247420114628602	0.222307265262675	0.211595236108739	0.246658400880892	0.245613064294131	0.217649890955413	0.229790955227977	0.196897179071402	0.192031057634377
4	0.173544968329962	0.23764191735525	0.249526129480052	0.242953074931048	0.244584728184137	0.221171090974123	0.173544968329962	0.24812736914114	0.250922794881455	0.221999880501577	0.220524071121735	0.197940543418131	0.198326408620583
5	0.167511585027837	0.234839043286716	0.249262502407955	0.248669162798203	0.246161642852851	0.213442126782717	0.167511585027837	0.26224612472646	0.249054125642354	0.217650302300041	0.230134594639349	0.190330413299043	0.201082131134728
6	0.16748889171986	0.26787825305354	0.255862020150503	0.226046434944155	0.242981251699331	0.224304596710973	0.16748889171986	0.249133118446101	0.248141829596543	0.219863021366659	0.225813709047668	0.195500971237374	0.197499409342225
7	0.168931630749276	0.255349193878648	0.236705587780125	0.231427759990667	0.242887921581263	0.21446893690004	0.168931630749276	0.245422907576901	0.247210283531241	0.228458301229314	0.233028368056564	0.20243238781922	0.197769726902927
8	0.190487229316755	0.251850993349099	0.251812003585501	0.232939048128568	0.235408377575069	0.228136785634949	0.190487229316755	0.258282577933368	0.250457788523281	0.225538077757218	0.235145019809382	0.197374180503787	0.196164537611103
9	0.165489537416709	0.272660976445331	0.243662415441733	0.223963684454197	0.241447138420793	0.211443890105531	0.165489537416709	0.259497962960435	0.242865585159272	0.217112010199239	0.225048418978769	0.19267521507001	0.209795889696009
10	0.159091393723957	0.264283662374188	0.246882582583208	0.226017147665202	0.229908681801337	0.229533335032834	0.159091393723957	0.25508698811425	0.244892547556063	0.219806892303604	0.234706272503361	0.195280836859351	0.223465192581756
11	0.162838867304119	0.250439709635695	0.256571687715396	0.242167836197105	0.242563680194239	0.212837224158958	0.162838867304119	0.261844979774588	0.241815165474039	0.217669742254759	0.231010933794514	0.196470702555705	0.228497807343273
12	0.181974137665081	0.281673108796078	0.250979750799989	0.237319957139995	0.237470460423579	0.217047670794167	0.181974137665081	0.256770083196754	0.243861031723392	0.222508956251756	0.225956235423316	0.198342440754672	0.225737490074889
13	0.1671088450237	0.283553230646887	0.252020376916166	0.239724147761427	0.234179017481733	0.220141359101169	0.1671088450237	0.248831757327727	0.237034339261475	0.212428812353808	0.227792689161428	0.186674781264172	0.217599999287561
14	0.166621738523633	0.243429544284306	0.263253351834509	0.233303934662674	0.236297931362858	0.219608995465256	0.166621738523633	0.257805768683376	0.246970847211383	0.229517733734781	0.241120136807715	0.193395869382679	0.222644258081119
15	0.17522121773129	0.246497343968132	0.258909518299194	0.236697707506241	0.237490529135641	0.219521453237074	0.17522121773129	0.255488592565101	0.242691488074144	0.214922412249582	0.22646494455435	0.196174508733092	0.210831501595281
16	0.169491614171667	0.271472719202168	0.256580605932943	0.244339096273402	0.248612011968323	0.224936073496373	0.169491614171667	0.248135362850529	0.246460555264746	0.218137066373719	0.228765337693513	0.201361273078176	0.21576486185486
17	0.176179789824667	0.248584382054164	0.260154646541629	0.233876924430875	0.239767820411875	0.211662374721439	0.176179789824667	0.261473041952759	0.245370900561832	0.217045406737124	0.223404315961565	0.194374488335134	0.204427112918677
18	0.222171588226172	0.232859535927294	0.255396428134772	0.233668738225471	0.230891806810486	0.222273572993778	0.222171588226172	0.260932162754084	0.25265398403937	0.216022102980059	0.228730352505385	0.199578487187282	0.213148382409031
19	0.225939488794166	0.266385818793557	0.247121658901189	0.241332332653239	0.234605904663306	0.21289139403454	0.225939488794166	0.250787580132856	0.244544622078683	0.219547858775363	0.232095548748356	0.191057176297573	0.226285139323658
20	0.23086795992266	0.245308160831915	0.260394845537354	0.251982231243776	0.234000332572869	0.221816182674938	0.23086795992266	0.2492603886537	0.251633791051444	0.213873588360972	0.225278330632267	0.196306405277243	0.232531320599245
21	0.241520568198747	0.246554582896023	0.253697758002514	0.24692261090294	0.238876790887382	0.209234361791987	0.241520568198747	0.254800635460232	0.253289620564686	0.215798368308701	0.232152726823623	0.195823588532204	0.224609613496284
22	0.238935393368746	0.252582020464636	0.246402390448906	0.243454905419176	0.234062722935653	0.226211772664563	0.238935393368746	0.259386845285179	0.254843555651314	0.21600506749351	0.234729377649107	0.189521199484404	0.218715701681366
23	0.262753509651629	0.271492287929124	0.246144122485317	0.249616606133444	0.240455310357256	0.221919684895486	0.262753509651629	0.248066443714479	0.248887504290887	0.210451474805786	0.239463215667645	0.200174307649774	0.217695648243245
24	0.253276067769025	0.256140211500029	0.256022225993126	0.243386752834373	0.241558954729511	0.223161507597912	0.253276067769025	0.251144249672607	0.245816566892176	0.211496207685784	0.23052087916118	0.195443801880817	0.220992375844607
25	0.249353386484082	0.24967810539331	0.254359532609421	0.234790206651105	0.238302332305601	0.214844049114907	0.249353386484082	0.255630247031045	0.247932475730586	0.210711581276004	0.235468250937987	0.189368192420403	0.239727025178669
26	0.242372646414795	0.25210423331481	0.264733275120029	0.230439768451605	0.240008657787754	0.223347297672881	0.242372646414795	0.257473998575803	0.250227963205152	0.205805223878864	0.226801922038687	0.191204643349019	0.237889360164474
27	0.249115560576169	0.262738347790313	0.26735086266573	0.232007664370065	0.23555250843804	0.222601390309699	0.249115560576169	0.241439094441692	0.248701664369301	0.216533793009628	0.220725212994539	0.197978674145055	0.245477344362713
28	0.231894588920356	0.268419007574151	0.262890926055564	0.233270126919832	0.239552813057926	0.229469705231857	0.231894588920356	0.249849821438536	0.250339316172565	0.210944561805353	0.24118588469585	0.183173014294366	0.246213694832686
29	0.233128693282208	0.279293384101836	0.270451456669489	0.24251123589896	0.233884518195784	0.223754139866394	0.233128693282208	0.243379025625105	0.246899671076873	0.210863723756461	0.240787594488196	0.196436488527825	0.241425933098532
30	0.250792724841453	0.283855065171682	0.234959634561085	0.240568890618061	0.245020833327788	0.226414962629999	0.250792724841453	0.238875235643882	0.250916895566195	0.21020356848492	0.232925752412371	0.194378201688365	0.236614087360275
31	0.260434944501169	0.228675905050939	0.220336901945728	0.251190534580303	0.236025502233366	0.227508313315517	0.260434944501169	0.251681210583789	0.250830854588643	0.218529400997377	0.226783229444853	0.184994058843652	0.242717815743735
32	0.241041278855516	0.242726683228263	0.209233349040552	0.242012984559037	0.234524029971703	0.221238163673602	0.241041278855516	0.248940365273951	0.245577143387929	0.210604919793852	0.235506318457808	0.200838511413988	0.24374963788602
33	0.262198800965898	0.246105865230743	0.217817239311449	0.239318317045652	0.239518362173929	0.226168963947846	0.262198800965898	0.250165967217786	0.245111170361865	0.206959360786993	0.221013143906794	0.189028192489625	0.24585619215672
34	0.24701681347195	0.22309012608998	0.234736922652274	0.24505025554876	0.246267680552655	0.228458051049163	0.24701681347195	0.242973067883253	0.242056036316857	0.214190494645119	0.23074286168249	0.199504805236849	0.256679428962689
35	0.247136963624468	0.183973986312428	0.224593121038227	0.236092455834806	0.239523485558352	0.224329117869707	0.247136963624468	0.239175647468445	0.250573123799639	0.201270500787514	0.228851099934835	0.19410148114018	0.261248219189531
36	0.238885717355253	0.195303101432057	0.225614832672737	0.245447953735633	0.233028305635378	0.226605492081332	0.238885717355253	0.249063956859337	0.24080478707561	0.202982699855881	0.222100935548683	0.190667026391196	0.259932544299585
37	0.251387223166749	0.179591778251693	0.228516998626882	0.243690233949151	0.240190346285317	0.227100121389807	0.251387223166749	0.245524679785365	0.241918616728023	0.203733992406086	0.23066949486709	0.198930552045074	0.261785103569325
38	0.244162487357786	0.181943608923259	0.232838126173882	0.249433726719654	0.233923634135885	0.230612839644696	0.244162487357786	0.246601002763579	0.239922076068822	0.214990710877805	0.225821365093033	0.196636415896927	0.256292920305634
39	0.231986139866051	0.185884379142017	0.218375929748241	0.241354045824706	0.240629804764899	0.221986268314492	0.231986139866051	0.242420481908617	0.240149329649735	0.20702496149261	0.226983838534672	0.188261342010221	0.253248888534413
40	0.239566633279964	0.183961428735992	0.225680778513121	0.253312051385043	0.241968174362027	0.218892261365488	0.239566633279964	0.239088433132796	0.239452180447889	0.198287199999044	0.223302548388962	0.197365517605886	0.255069238423167
41	0.237111764671489	0.184124179810618	0.243231613936752	0.237008915884731	0.240641183692224	0.227259904990855	0.237111764671489	0.247462119838104	0.235879584552231	0.212957469874297	0.215556142337679	0.194208998316161	0.253275216890795
42	0.265922365455545	0.197135226685286	0.243160058340436	0.2555037043353	0.240761995089794	0.227051421346063	0.265922365455545	0.243763234338776	0.237060078098878	0.200468118128451	0.205767568026477	0.186573844165751	0.252963088165141
43	0.239344421263574	0.19575845324923	0.233776990702518	0.262246686729247	0.237950151768573	0.228249770543517	0.239344421263574	0.245523125723963	0.232371390093943	0.232294210230417	0.199270898321983	0.193095074817045	0.26091951455583
44	0.243541009276809	0.193195278416804	0.233556881925033	0.251220233756427	0.248753477996999	0.233250099260616	0.243541009276809	0.243176536035538	0.229623939037186	0.237124866340082	0.19641000469268	0.191930525965903	0.253254618782138
45	0.247383645538224	0.201289206820294	0.232259940450952	0.246827917205667	0.246896939836392	0.224702000400785	0.247383645538224	0.236546964726747	0.227943925997792	0.200976780017816	0.201209454419602	0.196781109105621	0.256354202774693
46	0.230577880403557	0.201154931180902	0.226930399798903	0.261968742015322	0.239666837580489	0.230096020308523	0.230577880403557	0.244187612940094	0.22085467909788	0.220938210944533	0.202630054529447	0.189453188465816	0.264394337387068
47	0.239970825711922	0.202982075052776	0.227734638351636	0.244937884577545	0.251113526047188	0.226230249335664	0.239970825711922	0.24359508711225	0.229255549364002	0.217664467723805	0.196792333669897	0.18810839953851	0.253127731807591
48	0.229918062844982	0.206782551379223	0.229537636911676	0.237181778789234	0.247703608088839	0.233482080693832	0.229918062844982	0.241002264787776	0.227469205207762	0.204379483701922	0.198722233506306	0.222804723532278	0.263336194072392
