# Supplementary material for: Two central pattern generators from the crab, Cancer borealis, respond robustly and differentially to extreme extracellular pH
Source: eLife journal article supplement (doi:10.7554/elife.41877), 2018-12-28
Supplement: supp [file elife-41877-supp-v1.zip › elife_poa_e41877_Figure_3_source_data_1.csv]

pH	state1	state2	state3	state4	state5
7.8	0.89875	0.10125	0	0	0
5.5	0.0990384615384615	0.11025641025641	0.17275641025641	0.508653846153846	0.109294871794872
6.1	0.612777777777778	0.0908333333333333	0.0768055555555556	0.0806944444444444	0.138888888888889
6.7	0.933333333333333	0.025	0	0	0.0416666666666667
7.2	1	0	0	0	0
7.8	1	0	0	0	0
7.8	0.965416666666667	0.0345833333333333	0	0	0
8.3	0.967777777777778	0.0127777777777778	0.0194444444444444	0	0
8.8	0.910555555555556	0.0411111111111111	0.0483333333333333	0	0
9.3	0.411944444444444	0.401388888888889	0.186666666666667	0	0
9.8	0.284027777777778	0.445833333333333	0.266666666666667	0	0.00347222222222222
10.4	0.264732142857143	0.277083333333333	0.220684523809524	0	0.2375
7.8	1	0	0	0	0
