# Supplementary material for: Two central pattern generators from the crab, Cancer borealis, respond robustly and differentially to extreme extracellular pH
Source: eLife journal article supplement (doi:10.7554/elife.41877), 2018-12-28
Supplement: supp [file elife-41877-supp-v1.zip › elife_poa_e41877_Figure_3_source_data_2.csv]

prep	bin	pH78_1	pH55	pH61	pH67	pH72	pH78_2	pH78_3	pH83	pH88	pH93	pH98	pH104	pH78_4
1	1	0	0	1.79873744492571	1.8118153528553	1.6591252223994	0.961654054977901	1.52659985852555	1.43845405134022	1.39881042569861	1.20783203171691	1.26551503528279	1.1691002081262	0.961654054977901
1	2	0.190897973016706	0	1.76574234956249	1.7937392370152	1.66004524648357	0.964850060038466	1.50462144766462	1.44530015323393	1.38365646284473	1.22097654537592	1.25753245798192	1.13765758405851	0.964850060038466
1	3	1.02756132087321	0	1.80593839709751	1.77804264638455	1.67184126047288	1.05231605307842	1.48180924359247	1.44444728829024	1.38339342401198	1.22942308358851	1.19916497035984	1.10547263388507	1.05231605307842
1	4	1.21197467045308	0	1.76228592268755	1.78279999635895	1.68443505319594	1.04779626187456	1.44788063754776	1.44522629797413	1.39871065581331	1.21112501903665	1.19278051492309	1.06329671871111	1.04779626187456
1	5	1.35839445845698	0	1.76832412007258	1.79455689552992	1.68487616720717	0.957571875917238	1.42277944940504	1.44763594425313	1.40322186316535	1.23243263158332	1.17976352916534	1.0749322243435	0.957571875917238
1	6	1.59142463801701	0	1.77494533966505	1.80467105010399	1.69441508498352	0.966869530085167	1.4299408343332	1.45767875854083	1.4227610367292	1.25467115438546	1.17877778864768	1.07490962462686	0.966869530085167
1	7	1.69833238045304	0	1.77272820570879	1.82595722015905	1.70012126194448	0.851204793846802	1.44823483273269	1.46742442406725	1.4241621766885	1.2648173371002	1.20563497948112	1.14874703387092	0.851204793846802
1	8	1.70282160817837	0	1.75690756716147	1.82118871519235	1.70951490692829	0.99957547552058	1.46568388999455	1.45742943400366	1.42539721123822	1.24650771175054	1.22895961528626	1.01252063434503	0.99957547552058
1	9	1.65923333401399	0	1.78273027127106	1.83397360777956	1.69971506810942	0.948978861239553	1.51202410553168	1.45180174618927	1.44164843983924	1.25934470437058	1.23292868827669	1.07843754162953	0.948978861239553
1	10	1.74426686683764	0	1.78418017904113	1.82557143229072	1.71482124074465	0.857181487544403	1.52319059430864	1.43745463872884	1.44135915494408	1.26012705374132	1.23026572834075	1.08909358104396	0.857181487544403
1	11	1.69290458295117	0	1.78889889535721	1.8276295749034	1.70638129710519	0.899524631931821	1.53676742288639	1.4385406181519	1.4352495423729	1.26507802865185	1.24621510431975	1.08291103626221	0.899524631931821
1	12	1.84776853098341	0	1.77601170761879	1.83007990917467	1.70906039552433	1.02303721321641	1.53135050648464	1.44645944514515	1.4358706342007	1.263508848883	1.23828901629386	1.02377982093269	1.02303721321641
1	13	1.87231093755164	0	1.79267733641999	1.83539736648969	1.71403612205426	0.772272739810728	1.52980358894578	1.43193963142631	1.44406974326927	1.27498348950485	1.23611056382517	1.13756572634704	0.772272739810728
1	14	1.77839793314463	0	1.79461459162249	1.82947858588274	1.72060220208714	0.904340006518679	1.53391004150803	1.43805828227953	1.43559530074536	1.27962522625019	1.24934212879738	1.11942624961581	0.904340006518679
1	15	1.82969773172095	0	1.79347504133146	1.8415887793001	1.71932402744693	0.973776087964668	1.53241480598459	1.43231468910991	1.42402978789457	1.26911577262692	1.22179323970294	1.08550984006942	0.973776087964668
1	16	1.98574391605203	0	1.76205891861409	1.84486406859839	1.71336881557888	0.918599288913841	1.53951306782421	1.4325895601843	1.42524104152278	1.27667966327576	1.24295269138687	1.12610958587119	0.918599288913841
1	17	2.45413251090934	0	1.75944506552182	1.83116790706647	1.71869284659173	0.878983845607697	1.55141237853199	1.42077550124687	1.41536588939863	1.2809037472882	1.23413648323867	1.16219684091127	0.878983845607697
1	18	2.13812484667951	0	1.77818444217155	1.82425640287234	1.71065995626079	0.889752201706156	1.54656581805405	1.42918389405267	1.42381051246771	1.29416423945806	1.22898084624069	1.1132105523054	0.889752201706156
1	19	2.48578125677394	0	1.75860916937382	1.84044702181353	1.71432750206654	0.676330368962829	1.53434413407841	1.42874261616171	1.42027247303229	1.30489371814011	1.22524831724281	1.15151895488969	0.676330368962829
1	20	2.20013724456315	0	1.78831178299926	1.85343439793665	1.71680302142065	0.834204095206929	1.53409719901611	1.42543551000604	1.42564111195305	1.2964731983841	1.215224374298	1.13018819457919	0.834204095206929
1	21	2.23224470834496	0	1.78976247233324	1.84622242767264	1.73312448496032	0.685668559467817	1.52260340528644	1.42744519305396	1.42210725341219	1.2932314175044	1.23528594311834	1.13882902813038	0.685668559467817
1	22	2.33572021843646	0	1.77962601039962	1.84170189298818	1.73124424210956	0.761759619460469	1.51257638576854	1.42233707172922	1.41080359612696	1.29967198170651	1.23601084408627	1.14747660102087	0.761759619460469
1	23	2.19040610488608	0	1.7916924848114	1.83955420122897	1.71944915764252	0.767711629725287	1.50727665153019	1.42901747417866	1.40887877481326	1.30280764200964	1.20620561496792	1.1600156039312	0.767711629725287
1	24	2.17961751075808	0	1.80517452711154	1.84586398435288	1.73801039241266	0.89794961707006	1.50947926174435	1.43283337068018	1.42181146794224	1.28880896209743	1.21713592999133	1.13623026184918	0.89794961707006
1	25	2.17759702186687	0	1.78570720378212	1.83728156373643	1.72986286614759	0.8646387542409	1.51571242678665	1.42673732073686	1.42351216462561	1.29103280161388	1.22038875970091	1.13983105951047	0.8646387542409
1	26	2.39283676079203	0	1.7877538689032	1.84717206819906	1.72577333611135	0.871920731431358	1.51980325295565	1.41052654793527	1.40655352478242	1.30113488026173	1.20747588269319	1.13389101459004	0.871920731431358
1	27	2.49182928074718	0	1.80348290239476	1.84408342851165	1.73652794093957	0.852135001475768	1.52194144683977	1.41345433297088	1.41781271702168	1.30451335324535	1.24287867517655	1.12523721857963	0.852135001475768
1	28	2.66655400349943	0	1.78052238839647	1.87229247616401	1.74074075809524	0.80526202954661	1.52486234075575	1.41501365828675	1.41334807478225	1.27664649860432	1.22492228072046	1.10018778637541	0.80526202954661
1	29	2.59746040154331	0	1.77999497116481	1.86761882585053	1.7367519653764	0.898547088392814	1.5168233226227	1.40922939702159	1.42080474494374	1.2838220012711	1.20160724566843	1.11223150132775	0.898547088392814
1	30	2.34139475458033	0	1.75802501241991	1.85341815522257	1.74549347686064	0.938688872600121	1.50640077559931	1.39786599352524	1.42943743474403	1.30183397800496	1.23236272076218	1.04160479818526	0.938688872600121
1	31	2.4958775109399	0	1.75627416746213	1.84537210978041	1.74186011434553	0.953386883901008	1.49435605699331	1.38824615311612	1.4129078564829	1.28217567302835	1.2370570857718	1.11329138745074	0.953386883901008
1	32	2.26980827730722	0	1.73393607027819	1.867305623496	1.750273661663	0.959768892580994	1.48669897668963	1.38651125516451	1.4143399189709	1.28314354113319	1.23005861680083	1.09729361686359	0.959768892580994
1	33	2.44558339200275	0	1.72710385439363	1.89473455712354	1.75531832081983	1.02809890356318	1.50056094762159	1.38759544828975	1.42052502212209	1.28119787388049	1.24460840272761	1.08206601823672	1.02809890356318
1	34	2.33170384973651	0	1.70046981916272	1.89651687455672	1.76419142581775	1.06295071704102	1.49470634483283	1.3808829361952	1.41990798919802	1.29806499137074	1.25532124955073	1.09160629971534	1.06295071704102
1	35	2.20891920244819	0	1.67906358239046	1.90792464720269	1.7710387728309	1.07741379841486	1.4963749708201	1.37536208566805	1.40163807712751	1.2757342015966	1.24289179019385	1.07169621086474	1.07741379841486
1	36	2.26875621580848	0	1.66923507873124	1.92007604137149	1.76787094473874	1.07443626280004	1.50008230871941	1.37634683265397	1.36486426698839	1.2839326597966	1.24701363035003	1.09951311877494	1.07443626280004
1	37	2.16540596081588	0	1.66062985945663	1.90827732364524	1.79056012680578	1.10974417527645	1.51915696643649	1.36645536668143	1.34746572694343	1.25137457167161	1.23977802552993	1.10412270394724	1.10974417527645
1	38	2.22834676367628	0	1.68881141494679	1.92247993828184	1.77697819005522	1.13293932880735	1.50364844203701	1.35650943428394	1.33655893873486	1.26083268372405	1.26000788465242	1.11789156433719	1.13293932880735
1	39	2.42621086426226	0	1.6744213259251	1.92937137818848	1.76878868549576	1.16452507437	1.50479633840079	1.3592924094202	1.33096486717331	1.25968636711509	1.23884600304219	1.11620869123763	1.16452507437
1	40	2.25421535945935	0	1.66962655806759	1.92121187806811	1.7812167419281	1.22101800197681	1.51792999626234	1.35252441359696	1.33888368518596	1.25246936150695	1.21774300696285	1.11399538719414	1.22101800197681
1	41	2.21074823243754	0	1.64293086608383	1.91833476831149	1.7781842420349	1.23597294090495	1.50792258304627	1.3459897085676	1.32924638522569	1.25309655022837	1.22761261897	1.0527688735662	1.23597294090495
1	42	2.15119088552977	0	1.65614766393887	1.91499534098399	1.7757139180083	1.25861690664104	1.49270238765564	1.3519615304728	1.35712404378839	1.22919955374669	1.23714039067259	1.08563304745997	1.25861690664104
1	43	1.99349383503329	0	1.57760401183603	1.91919559110187	1.78750415011528	1.28562653542918	1.47967495484529	1.33218841917785	1.38526346514031	1.21850708028536	1.24457267554467	1.08447483172822	1.28562653542918
1	44	2.18595263303762	0	1.58053696792438	1.90167219028913	1.78206146939905	1.31003604807213	1.62695910282392	1.34237981443279	1.37049280000105	1.21595124916811	1.24355629767211	0.98964754057641	1.31003604807213
1	45	2.12255254002031	0	1.59967100522089	1.9021472276213	1.78475197460033	1.3605756976192	1.62188264706894	1.33688295635231	1.34620424809228	1.23942336284013	1.22814947716528	1.08787414797434	1.3605756976192
1	46	1.96646840483433	0	1.60087477702336	1.90422577612496	1.79145568808797	1.38153291927426	1.59662743543878	1.32921774976644	1.33722380341922	1.23908874271441	1.23921409091803	0.994442746942267	1.38153291927426
1	47	2.00498412295392	0	1.5968107669291	1.90203778930051	1.7904768232582	1.40868901731059	1.54710507967487	1.33370150520106	1.34926901550005	1.25645913110626	1.24062086795549	1.05023730762503	1.40868901731059
1	48	1.91684006406539	0	1.57574787189526	1.91058975167982	1.78833523232914	1.41331696008362	1.56219490777217	1.33220693947979	1.32249320772749	1.25789332386565	1.21480662096653	0.957840650712744	1.41331696008362
2	1	0.263806563485896	0	1.05773222727169	1.1083528651579	1.15394417657563	1.19224512823067	0.263806563485896	0.760975509785705	0.768563710835881	0.665197589178995	0.759906156195012	0.775597340309079	0.713099164658425
2	2	0.39669706186954	0	1.05863397515298	1.10773847048896	1.14801468311511	1.1994509721136	0.39669706186954	0.759839081973046	0.769110562684349	0.680003335596785	0.781639192700548	0.812034334995983	0.602342826255938
2	3	0.376643941649488	0	1.07711580307377	1.12200323872177	1.1527756374834	1.20625775571905	0.376643941649488	0.743590344052808	0.766689869606461	0.645605341227632	0.774876090927911	0.781679558310963	0.679381152006313
2	4	0.226860280683945	0	1.07587360902065	1.12685922843836	1.16905731697822	1.20263467007921	0.226860280683945	0.736099479020926	0.773579574333284	0.654256939905124	0.737960666518009	0.782250762076383	0.644153068761847
2	5	0.355128300433893	0	1.06727337780619	1.12453455991556	1.17636479403227	1.20400978123133	0.355128300433893	0.74298162621829	0.782978250167094	0.622073319353369	0.740412392088573	0.773903589140706	0.696616782851126
2	6	0.492262609041625	0	1.06668518360043	1.1214934028958	1.1829071006953	1.21115747602275	0.492262609041625	0.74987894782388	0.779580099399721	0.554705715749058	0.710351696146164	0.767617583623017	0.658695095842224
2	7	1.0813654808649	0	1.06099078171172	1.11862214408697	1.18345333267702	1.20690602199387	1.0813654808649	0.748974379138106	0.767216704359797	0.591882193465736	0.702089379222461	0.769692280408124	0.652147198459704
2	8	0.617385199207463	0	1.06963607253206	1.13498510419586	1.18910991286118	1.19134265831476	0.617385199207463	0.754141223119886	0.781457236590153	0.624902003843939	0.729345951322783	0.768403023851059	0.728914799293103
2	9	0.596584666175357	0	1.06236105849749	1.13104906512449	1.18417518585722	1.19185148182529	0.596584666175357	0.757145786140769	0.78890455713267	0.609726095343877	0.735676675321788	0.785662650905562	0.735103444352113
2	10	0.510246429216949	0	1.06840448059734	1.11725247801046	1.18647126094929	1.19575602527948	0.510246429216949	0.756300841860639	0.788963774193071	0.659011096012009	0.727551013598906	0.768820776315942	0.729674687343693
2	11	0.54014425570021	0	1.06593626708792	1.11664433706054	1.19029402272565	1.19613004860637	0.54014425570021	0.761914816709592	0.778597539293218	0.637600834528319	0.723183333682438	0.77585327931062	0.754644997836173
2	12	0.313605584093349	0	1.06140742269721	1.11584872413067	1.18693513436371	1.20850130576446	0.313605584093349	0.754081021266644	0.781668754864939	0.645435032973606	0.744262486114947	0.78703326019039	0.748732171175109
2	13	0.771112817524498	0	1.06969332391624	1.12469494005579	1.19615466010929	1.21463240368952	0.771112817524498	0.757195788386663	0.788399688576546	0.628768721511899	0.724369844132567	0.797963043357678	0.667487456707582
2	14	0.482698718799038	0	1.06957582947202	1.11481766773461	1.18505181942064	1.22113212882426	0.482698718799038	0.763630972188603	0.785428283903358	0.600522175306841	0.74216897448061	0.818754940936845	0.738633756355788
2	15	0.583491461586865	0	1.0597101378279	1.11342646454703	1.18966612741681	1.20429323697548	0.583491461586865	0.763216801794004	0.77832294368784	0.661216515056828	0.749815857127323	0.816543017755362	0.721842262403265
2	16	0.757458951367443	0	1.05599586334598	1.11479072168729	1.18414486329525	1.21225206127237	0.757458951367443	0.756021160721086	0.79975791364263	0.624607443230076	0.743384604937979	0.828111889683366	0.723109791575676
2	17	0.707609440678391	0	1.06425657131765	1.10649266800791	1.18572620240829	1.20849970499229	0.707609440678391	0.759382175792845	0.787935860367685	0.641740180854685	0.743695743073318	0.824212525765368	0.733176850545733
2	18	0.947996757635664	0	1.07205693588006	1.11021554128019	1.18285222454958	1.20091413383589	0.947996757635664	0.759081107760647	0.781347649852399	0.625987458814233	0.753172330007511	0.80708542452668	0.710793500629693
2	19	0.738519985625527	0	1.06632525706623	1.11035540470837	1.17805631532758	1.19835875416507	0.738519985625527	0.753844316174256	0.793554380796118	0.628504185467613	0.773323872407881	0.814507736666174	0.752783995635745
2	20	0.81611685189883	0	1.07035274770492	1.10693775072446	1.18689607136733	1.18937503711471	0.81611685189883	0.760320835419034	0.789708069729876	0.661199094362884	0.743164619662159	0.82490077669439	0.720689753948968
2	21	0.94285652682086	0	1.06796062724543	1.10610814484489	1.19288379695564	1.19221844749658	0.94285652682086	0.763113003749424	0.780256771381593	0.636829705183212	0.749375137398247	0.824187543123546	0.738000807082392
2	22	0.867291270426144	0	1.06652412986762	1.09623210439761	1.20099360721333	1.18729559707678	0.867291270426144	0.767862959539641	0.785454456910105	0.631058757740425	0.753274225899454	0.818448002048838	0.70704857222788
2	23	0.934733583655312	0	1.06825201135302	1.11651151367664	1.1878914031627	1.18293925177062	0.934733583655312	0.777113993719561	0.762589211557808	0.648080016752677	0.758960670668554	0.813154487564291	0.734569451954694
2	24	1.03093566212125	0	1.07616284620833	1.12267084069686	1.18676002852148	1.18061099538396	1.03093566212125	0.774568269456676	0.765635081579911	0.648769891449383	0.774143696956755	0.816917547703259	0.719527885812487
2	25	0.982574643425405	0	1.06309633094728	1.1350745556095	1.18775192890692	1.1807072297264	0.982574643425405	0.763073941138721	0.750091430076959	0.642253065393212	0.766830811053675	0.816943904801283	0.731480920025267
2	26	0.991879203395089	0	1.06614052610481	1.14854265076283	1.19147225821408	1.18013557190908	0.991879203395089	0.762177180802907	0.731045518461033	0.653746466836661	0.768787921893956	0.796121170224989	0.694190121786508
2	27	1.00604954240908	0	1.08764920367897	1.1537340557472	1.18885263852503	1.17745923778161	1.00604954240908	0.76316539228787	0.735527423236808	0.66405821767118	0.755880197871843	0.807033804980363	0.715770931504409
2	28	1.0044797458827	0	1.0395518170058	1.16354747935096	1.18924604085369	1.1784841566241	1.0044797458827	0.765147179372844	0.715968398948047	0.673960208922368	0.763211622604498	0.815804425879152	0.715200234923323
2	29	0.948590409019415	0	1.04679523720852	1.16227348696662	1.19106071121334	1.17053306405323	0.948590409019415	0.769197129028089	0.658254060768432	0.597192341334925	0.801150642624553	0.812528479056568	0.692767598028849
2	30	0.980818181244807	0	1.08766551885635	1.17041879052409	1.19532450355521	1.1767546323742	0.980818181244807	0.748247750644437	0.712816803655793	0.641323900110123	0.772221123477869	0.822825500151252	0.693519809247915
2	31	1.00876127527419	0	1.09303985091371	1.18029846595649	1.19624610386595	1.17407200365877	1.00876127527419	0.752273032263034	0.672426571226365	0.61707992897812	0.767771791254075	0.81099217668644	0.703365845588033
2	32	0.99506786078917	0	1.11030508554652	1.19757220506168	1.19116753264316	1.1724934722463	0.99506786078917	0.743461641524207	0.66559045722055	0.713168093868509	0.751861965403054	0.811635868507727	0.664775414595738
2	33	0.987509286447683	0	1.06717807641453	1.18608512075425	1.18607120402439	1.16627833380591	0.987509286447683	0.748561846554451	0.667495478873655	0.657949146421173	0.772741573360111	0.823385135627064	0.696365477629542
2	34	1.00464094207983	0	1.08248908200453	1.18595607890033	1.17767861909412	1.16444150956307	1.00464094207983	0.747566358134656	0.634980739081848	0.655263457190447	0.789587507119867	0.820920640063884	0.710542744860517
2	35	1.04530831815841	0	1.05891421735424	1.18098195536114	1.18596789667081	1.16702044038999	1.04530831815841	0.734287674103019	0.614008093417088	0.697339656295811	0.791279936358982	0.821524426244505	0.716292725456996
2	36	1.00374024450739	0	1.04232327827775	1.17912659133206	1.17489888942691	1.16668785746777	1.00374024450739	0.740757894430168	0.627330441503654	0.688357650470137	0.805835697621275	0.818598105199881	0.7513114323886
2	37	1.01927567964729	0	1.05459752923676	1.18468734697916	1.17386924414867	1.17368679674728	1.01927567964729	0.747942683275613	0.605678599099863	0.679119439977683	0.791119882736506	0.814817410461797	0.739423482230856
2	38	1.06510778770472	0	1.01980321265366	1.17440537621088	1.17467825614589	1.16586807297255	1.06510778770472	0.743480892072801	0.616414664878495	0.704241601499428	0.80440287936523	0.814007616507765	0.768765230029969
2	39	0.947469556763476	0	1.00519614162196	1.15860047907414	1.16854090054557	1.16419299042213	0.947469556763476	0.755798529962532	0.628902767080213	0.708111400555723	0.805709973034865	0.800112922608231	0.777294107371607
2	40	0.956571322754086	0	1.04234478951112	1.1599252532127	1.16472012160003	1.17459876543833	0.956571322754086	0.752819542776627	0.596648767244295	0.706800633987473	0.793214663258242	0.794739750109075	0.792362939981427
2	41	0.943850152441153	0	1.04385523655145	1.16223237516178	1.1717356694739	1.16184366363311	0.943850152441153	0.758134338746481	0.583063405573404	0.671260086420677	0.805534575717835	0.790107436208115	0.776455513037102
2	42	0.978899977982436	0	0.995295015081211	1.16556164049563	1.16728561259121	1.1592572658608	0.978899977982436	0.756134530440625	0.571182078111667	0.697946238932105	0.790358158719741	0.798723516754462	0.793676167130583
2	43	0.939469591592048	0	0.980373983137532	1.16658811485069	1.16940146197488	1.16886999538071	0.939469591592048	0.752079292445604	0.584477820872519	0.762742222041439	0.788235898202266	0.79239693206019	0.79993909984387
2	44	0.919446732551553	0	1.00651476998344	1.16661962151836	1.1705978355247	1.17203158381938	0.919446732551553	0.748492388190553	0.576919715845121	0.714535313261711	0.802156842582431	0.796349203702315	0.803568787641722
2	45	0.913073447818546	0	1.0314791280062	1.16608070152043	1.15678707886972	1.16569227441802	0.913073447818546	0.7578381750395	0.553334511953354	0.729021241157125	0.779132227618046	0.798085312571531	0.829481045838394
2	46	0.936503381552819	0	1.03113027398463	1.16862720217337	1.1615019257132	1.16981761927378	0.936503381552819	0.75942748879543	0.579118813509565	0.740069457394815	0.784149425318072	0.793387521343083	0.837104013886542
2	47	0.876012527812646	0	0.944778871126938	1.17291894282179	1.16079298892081	1.16295050301573	0.876012527812646	0.762793637923476	0.585646835314119	0.746250851758369	0.769841865110729	0.781034727955201	0.837799662905633
2	48	0.884423146426438	0	0.974660663239823	1.17292057874915	1.14600361998899	1.1513026218382	0.884423146426438	0.766385290925495	0.586250897692043	0.747883549919868	0.780557352371768	0.763883183900767	0.859793104844188
3	1	0.295603779336161	1.41734319889917	1.14888731886	1.20035957824488	1.17664625391489	1.13200950111914	0.295603779336161	1.1266161765691	1.18581419545196	1.04014565392133	1.10370243783409	1.13549473401193	1.27484302593678
3	2	0.0711022122742333	1.49092735651671	1.11283990750832	1.18765139360955	1.20339819025584	1.13285441258838	0.0711022122742333	1.11489055835719	1.17941993073227	1.06494787680589	1.076613563335	1.41305498670554	1.15726244689745
3	3	0.382638224562124	1.50591737105154	1.08114289286938	1.1882185363361	1.17962122427574	1.12755861107718	0.382638224562124	1.11740622329529	1.16754841546107	1.04909033901402	1.08449410840509	1.18721995597726	1.13823011813065
3	4	0.600099384791767	1.43837018997486	1.10053173081066	1.1907903525668	1.18269035497502	1.13763511828394	0.600099384791767	1.12416474125231	1.16454710765554	1.00591466374475	1.08414057792751	1.90239587325669	1.17252617072131
3	5	0.627302333945571	1.40923874983948	1.11372878701594	1.18692667742319	1.18243599148459	1.14383300546729	0.627302333945571	1.11999468589768	1.17720971837572	1.03773854435736	1.07574440761433	0.98911913313359	1.04379154130102
3	6	0.80905110594607	1.34512720448727	1.09134695962869	1.19632584978915	1.17554393048393	1.1438988585158	0.80905110594607	1.12888898539958	1.17261949825704	1.24300536161813	1.09481030077034	1.1134161054201	1.08755281881835
3	7	0.972882200205483	1.41804441816757	1.08150276817376	1.18934875483252	1.1846704045915	1.13877456052401	0.972882200205483	1.13680461083178	1.16620211656912	1.05780906883791	1.0960818740735	1.14124419062739	1.16376729915547
3	8	1.02790092826542	1.504836497349	1.06708883240448	1.19268885849985	1.19145141459864	1.12980269593025	1.02790092826542	1.12648317885176	1.15461875667012	1.03050531261487	1.05196894422478	1.12556005421139	1.07656588163968
3	9	1.10612192121237	1.50651797551987	1.06248766966798	1.1955003864123	1.1665452621502	1.11932962095237	1.10612192121237	1.14536851813973	1.16285613267901	1.02999179747323	1.0865932112219	1.13403658054564	1.09200651033634
3	10	1.49308911819846	1.44055746809507	1.07156557556227	1.19182361947482	1.19129071174857	1.12390641416637	1.49308911819846	1.13990376146108	1.15743312656932	1.22651540341295	1.0874030805186	1.15738461321745	1.13398233066959
3	11	1.2691630812429	1.40407293250428	1.0551844683223	1.19226208432525	1.18568483089048	1.13132369226345	1.2691630812429	0.999330290059482	1.1646222941983	1.04321539028814	1.04259985826939	1.15553216732504	1.26301280831257
3	12	1.63586730018065	1.40943012952525	1.06049928964015	1.17734919221847	1.20654371873279	1.13264534158988	1.63586730018065	1.15050912283007	1.17729062583104	1.03732118988835	1.09165306726296	1.20721008967918	1.22301247169846
3	13	1.29322999612688	1.34621802559677	1.06779119710352	1.18034388781802	1.20561142416379	1.12786566708741	1.29322999612688	1.15115912373032	1.17506284496874	1.00925476485643	1.30438663475008	1.20664110842371	1.32804625761464
3	14	1.25895939913856	1.39142539976907	1.08927345106035	1.18308402430967	1.20436516088286	1.12676753224937	1.25895939913856	1.12102373654126	1.16917267022127	1.02142159080606	1.09861682065888	1.16702082351208	1.22494757203405
3	15	1.47281800661304	1.37435825847404	1.09555918266566	1.20683497898889	1.20122344740397	1.12656166376717	1.47281800661304	1.11419515967981	1.16964325287514	1.03669750802801	1.09784428190973	1.15459413579406	1.32647602261569
3	16	1.44994946735745	1.39011444249773	1.09600155468475	1.18771909355246	1.20395961353015	1.12913618183774	1.44994946735745	1.12908358756317	1.16941770713397	1.05005460599438	1.49090390762548	1.1551575253387	1.27630180362459
3	17	1.78264585790579	1.34360070469039	1.09062351086013	1.1943438137064	1.20902237368113	1.1445042940312	1.78264585790579	1.12621790245795	1.16855649011225	1.03408865283273	1.08653684226718	1.14816724832658	1.3039187596089
3	18	1.56730363821019	1.37060266234844	1.09268206083379	1.19679417199114	1.21008323563154	1.14876803781125	1.56730363821019	1.13706319035571	1.15870706982466	1.01979395018579	1.07608056765334	1.15825306167188	1.27121439533902
3	19	1.64178965404311	1.35373511710718	1.08015129351729	1.20119878172762	1.20983144770309	1.1469038302279	1.64178965404311	1.14250796459032	1.19434732087708	1.03294529571221	1.09716633370071	1.16572618624288	1.31864734086704
3	20	1.93527112156716	1.3555987647873	1.07313245963143	1.19478250020918	1.21702477507394	1.13594465654351	1.93527112156716	1.14828929027501	1.16580236343952	1.04458858133978	1.09561920076232	1.14321808647854	1.27477216273942
3	21	1.85311072538538	1.35910400449314	1.05317527290072	1.19115829601964	1.21673828011689	1.13049117765573	1.85311072538538	1.15806820121476	1.16031834111865	1.02085231431976	1.09274623176517	1.14761420794746	1.30260485842299
3	22	1.78516319704519	1.39720247649965	1.05861160942826	1.18850206579522	1.20936220154925	1.15028187593294	1.78516319704519	1.15890695050776	1.16798149334303	0.976496425589355	1.13878469685618	1.19044806334479	1.24472908181658
3	23	1.69114484179426	1.41675238385149	1.04420988798649	1.19807187348027	1.21592850154059	1.16796405098571	1.69114484179426	1.16534701422941	1.16490658272288	0.989737411406258	1.14057902099659	1.15611220350709	1.29811771530996
3	24	1.82783669532064	1.32740206614381	1.06756177392736	1.19168809882855	1.21604855373807	1.1599232519178	1.82783669532064	1.14865781783846	1.15605948316068	0.987438634691002	1.14594760474558	1.1489297637471	1.24508373186175
3	25	1.96991458340888	1.36899791842465	1.10419071216757	1.18713371181469	1.21308136137577	1.13086191047942	1.96991458340888	1.15361495719498	1.15403018720162	0.98071679433927	1.10556182944755	1.14531822072397	1.28814618167499
3	26	1.92142622758635	1.34484160523527	1.11165332615992	1.1911238282228	1.21528420760022	1.14702535401867	1.92142622758635	1.14225355000549	1.14999672371375	1.04631585087116	1.09106331291873	1.17919489936843	1.27267895053683
3	27	1.93156896442327	1.43310887741917	1.11675741080204	1.18837112352461	1.22052850225806	1.13279811082083	1.93156896442327	1.15408548351557	1.18703022911759	0.914198794733563	1.08844342477363	1.1615699235501	1.23454613404207
3	28	1.94694577109998	1.49678166053053	1.0935448672759	1.1846790584987	1.20943766151607	1.14081292732374	1.94694577109998	1.14326601926925	1.16203619458225	0.889139149934105	1.09141630450329	1.14444639180694	1.30548955766524
3	29	2.10886844351972	1.38207164839683	1.09554434484758	1.2067563782211	1.22200336879105	1.14876646328433	2.10886844351972	1.16713171850542	1.15020974470902	0.887721233656154	1.10473814619068	1.11499059224595	1.27641078040754
3	30	1.97428864428271	1.58048726451246	1.10265266958909	1.19604811791288	1.21177264218058	1.14857641208751	1.97428864428271	1.16781231516901	1.13550850985364	0.911519106436798	1.08694766595116	1.1454953383182	1.29445007409663
3	31	2.10400798509548	1.46504120755448	1.11852982753414	1.18228733038329	1.22069354499007	1.14439591192006	2.10400798509548	1.17537144517047	1.15220294747533	0.880942056924006	1.10879467371269	1.16870897787631	1.30976985545066
3	32	2.19550723464566	1.64940270658293	1.09539349760441	1.16768966185202	1.21957957623988	1.14391907158267	2.19550723464566	1.17152862398412	1.15638244123686	0.904683750797205	1.08277426107803	1.15770990556617	1.3193180431215
3	33	2.14727203512375	1.64395138410854	1.08097006023411	1.17171251583945	1.2222386561251	1.15003012618588	2.14727203512375	1.17521859449258	1.14229824382584	0.885099752659384	1.10032293863009	1.12188988242822	1.28937860853624
3	34	2.25275781122404	1.69221761843005	1.10761755166277	1.16433471828833	1.21441708879569	1.15632246849663	2.25275781122404	1.15937515159022	1.14798680692671	0.884826912141794	1.07624077856836	1.14638057419485	1.2991922647608
3	35	2.11465999851127	1.53588612924748	1.13091344137953	1.161779997165	1.21015772837171	1.14784160806347	2.11465999851127	1.15839065318929	1.13611374220447	0.913204535692113	1.09457340919702	1.15568144459325	1.32814866072497
3	36	2.23590278913627	1.5574359240415	1.11956445254124	1.19350720057897	1.20807226902509	1.15374727922204	2.23590278913627	1.16615825313714	1.14567806930563	0.91410657077265	1.08111536523685	1.15794649910783	1.30955769339277
3	37	2.17618117425237	1.57336387724757	1.11833125233214	1.14161970890921	1.21965978201072	1.14928396430314	2.17618117425237	1.16880423619464	1.1372040401595	0.904821408058385	1.08343831214852	1.13868010055341	1.29358742762263
3	38	2.24949860244454	1.59446424457979	1.12993481499504	1.15822667187156	1.21532235384523	1.15326307976516	2.24949860244454	1.16532798582553	1.1275504250915	0.887521665452943	1.09515469415816	1.12977978463494	1.31611550294587
3	39	2.20609394492235	1.54035007161144	1.15158413181251	1.18231278254332	1.21067102026673	1.1493130797472	2.20609394492235	1.1620190188701	1.12813831699389	0.917317512846635	1.08979353170003	1.15477522790277	1.30150334132126
3	40	2.1899946985746	1.59685027618813	1.15576969881628	1.17823322116718	1.21576652250528	1.15682458919512	2.1899946985746	1.16775176059508	1.10690696280481	0.940469527311611	1.10774988374955	1.13188734604769	1.31399324236922
3	41	2.29021432236777	1.74010505133639	1.15879154506717	1.18683798368563	1.21254818331537	1.16041005853843	2.29021432236777	1.16416056519634	1.09571445780577	0.951720072491748	1.09384049200955	1.14502037302653	1.31437301148417
3	42	2.2884732220265	1.7774950610987	1.13337948059291	1.18029057373628	1.20981512117779	1.16148484136289	2.2884732220265	1.15740854207692	1.09774447869034	0.958237465636406	1.08378549217407	1.15096902952733	1.32533645658319
3	43	2.25146383044609	1.55585003174741	1.16731644692922	1.15919112437359	1.20497975645542	1.16139486271433	2.25146383044609	1.17311806779086	1.0849296585632	0.948436509338087	1.08980438748012	1.15421973162415	1.32362194675842
3	44	1.96696582052829	2.01705597250992	1.17277442395237	1.14733364911392	1.20673549711287	1.15917222449274	1.96696582052829	1.15849921902762	1.07920452187997	0.967663343796713	1.08508652407942	1.14768492989138	1.33180499889461
3	45	1.97055171816931	1.83215024826394	1.15657482043941	1.14357363551081	1.18148582831396	1.14223616855348	1.97055171816931	1.14849430394274	1.08256990810326	0.976680783864157	1.11534112252389	1.13318234964172	1.32776265682927
3	46	1.86322717224439	1.51715367161591	1.14201368399571	1.1526708558825	1.18146792457979	1.15271558533844	1.86322717224439	1.15252975666582	1.07311480948012	0.981094309971662	1.0765558392266	1.13070149746369	1.31307674216889
3	47	1.72676287929644	2.02917912938965	1.16360374304124	1.1743278113982	1.19415693510828	1.16413697212489	1.72676287929644	1.16492720091618	1.06647179597878	0.992546047722137	1.10762961852854	1.14538090223769	1.31754101247494
3	48	2.0363680662297	1.70144706453978	1.15965494634381	1.1517398602805	1.18701824705164	1.16532072292581	2.0363680662297	1.18020286411367	1.06726167886299	1.0059714952283	1.0944093021927	1.43201470267702	1.3275568899694
4	1	0	1.74864370601326	1.63566008521901	1.58026014576632	1.6059345523836	1.31131451845464	1.61005767541875	1.49207358266199	1.54531549577542	1.42423481915598	1.44400713609219	1.36635536736545	1.31131451845464
4	2	0	1.72975347989753	1.64701442002359	1.56501472554623	1.60947371565937	1.3013644437754	1.60988106544971	1.49199843618729	1.5342650380845	1.43435785042309	1.44959306902131	1.36304102493254	1.3013644437754
4	3	0	1.74459285310767	1.63362696935312	1.58552946936353	1.61195751668402	1.30270945211309	1.60433534652164	1.48992856106329	1.53697692326175	1.44467132152592	1.44471096681158	1.36488787403537	1.30270945211309
4	4	0	1.81005105563593	1.62266155107038	1.56880670689988	1.60698259478983	1.29420429684372	1.60037544142112	1.4723228340756	1.52508920431412	1.41992072716758	1.42869966913208	1.34172567794185	1.29420429684372
4	5	0	1.78049707255333	1.6157929830607	1.56697062803813	1.58496896867173	1.31603381240706	1.5948070933692	1.46919472959334	1.5215546769783	1.40810605823392	1.41982525639278	1.3369396395329	1.31603381240706
4	6	0	1.76447505401816	1.60621522894117	1.56292229002766	1.59282494611275	1.30483564829276	1.59514517759379	1.46644935825635	1.50275743576781	1.39622766429217	1.42186926942678	1.34745051919671	1.30483564829276
4	7	0	1.74496433829057	1.61799017018575	1.563319711359	1.59276602752059	1.30450887503973	1.59864115327152	1.46449422301725	1.49703593439589	1.3991614828862	1.4173771714953	1.32665232081564	1.30450887503973
4	8	0	1.73426258822233	1.61745696891244	1.56110876928351	1.569973212912	1.30503483647465	1.59505955575783	1.45959831607688	1.49776128617009	1.40002478655534	1.39860860751014	1.3324345077705	1.30503483647465
4	9	0	1.71630682320965	1.62095388043217	1.57001506008421	1.58597164812263	1.29877093782649	1.59598500657296	1.45814483872072	1.48182241673971	1.39832776954012	1.39519864910721	1.33179967778978	1.29877093782649
4	10	0	1.73160637340512	1.6234786365203	1.58978792230164	1.57864754232492	1.31135483518448	1.57703364631639	1.45837857211489	1.49123911356041	1.40017189948542	1.41163048067836	1.33731383814547	1.31135483518448
4	11	0	1.73572575199687	1.62182490600282	1.60280187782882	1.57733164727078	1.30832082045233	1.57946053450308	1.45921221890339	1.47833939441633	1.42808525326332	1.4046612232623	1.33869499102535	1.30832082045233
4	12	0	1.74784996169478	1.61732222283925	1.59567295301561	1.57766615865327	1.29458501570999	1.57284156682837	1.46041719257861	1.48292024711722	1.42361091828216	1.39106805746674	1.32694461292338	1.29458501570999
4	13	0	1.69987053284101	1.6176775159694	1.59993590042961	1.56909011232414	1.29372905865943	1.57066745771259	1.46686414104026	1.49218855582598	1.43118249431097	1.40268076997738	1.33086562014625	1.29372905865943
4	14	0	1.79627654544868	1.61262149013814	1.5897216849208	1.58385398600444	1.28889295635648	1.57334664462593	1.46267691816307	1.48516703401984	1.42332087272896	1.39751927045692	1.34129914953065	1.28889295635648
4	15	0	1.73375279607008	1.60988715622555	1.60216526839054	1.57857261181231	1.29298964241609	1.56542356142903	1.46829902875072	1.47529675308478	1.43493940754562	1.38150115107975	1.34082203579547	1.29298964241609
4	16	0	1.69752604132616	1.60425352381398	1.58588784303309	1.56796186991765	1.29586957980704	1.5570380854966	1.45089934867034	1.48028621758649	1.43678289362007	1.39083669904655	1.32833059983492	1.29586957980704
4	17	0	1.74706424720552	1.60203925130089	1.60014689413363	1.59192244078526	1.29745266514168	1.57030609099606	1.46272447987787	1.47970565335355	1.43521291019834	1.38956100930001	1.3331426767954	1.29745266514168
4	18	0	1.74038315106242	1.60956348652092	1.601719116649	1.57965235131921	1.29798524981427	1.56124486416934	1.4570473079091	1.47421282799186	1.43512926740275	1.38911739783983	1.33575475672887	1.29798524981427
4	19	0	1.69516220572955	1.6037383544222	1.5923909987222	1.5806040337154	1.29826666657479	1.5658505181501	1.45443864300162	1.47239109069178	1.42725924720959	1.39571254959462	1.33638730157292	1.29826666657479
4	20	0	1.78645146519065	1.59476284168587	1.59668413886295	1.5808145456032	1.30041467556583	1.56658750805984	1.46258080325804	1.45457422488762	1.42963508943957	1.39554465716792	1.3345836833667	1.30041467556583
4	21	0	1.78107227797761	1.59996101681604	1.60352451977911	1.57471131248447	1.30636435624983	1.56534336210325	1.46320202061149	1.45336471348378	1.43264218584373	1.39247343880858	1.33675581978394	1.30636435624983
4	22	0	1.75052622104188	1.60826423593938	1.59824998969838	1.57903446436172	1.32397157219099	1.54418773146753	1.4771973831203	1.45344509482248	1.43188082118906	1.39598218950741	1.33346087757777	1.32397157219099
4	23	0	1.7000374861709	1.60867755183425	1.58909366951515	1.57539613090038	1.31805431682548	1.55134880598158	1.45758982804048	1.45285149449406	1.4359258156091	1.39436827315788	1.33818985094978	1.31805431682548
4	24	0	1.70448820940498	1.60475070893804	1.59662644802006	1.57445982850117	1.32234212380357	1.54383569742718	1.45728206285137	1.44995887062952	1.42460035118271	1.40552371137436	1.33588195961246	1.32234212380357
4	25	0	1.72499780229674	1.61058249194497	1.60912358894219	1.57466424006712	1.32662113565026	1.5630423175679	1.44180559828442	1.43228831656018	1.42193478251884	1.39759862176794	1.34869407100155	1.32662113565026
4	26	0	1.70829971849594	1.60849770085067	1.59552439653255	1.57685550947939	1.32852530349737	1.55255004994612	1.44210709461255	1.41508332738239	1.42754325733323	1.40076264342214	1.33515246520336	1.32852530349737
4	27	0	1.73676004214602	1.61305482241578	1.61262583697312	1.57843388547523	1.34459385406328	1.54398788326883	1.46434502074436	1.40967499741556	1.41703544963771	1.39794158696776	1.33707678641751	1.34459385406328
4	28	0	1.75219105535643	1.61237779524635	1.62253699053378	1.56985288002946	1.3571058962724	1.54831148525263	1.45080350405122	1.3990775218081	1.41290487956163	1.39407144791689	1.33554582604003	1.3571058962724
4	29	0	1.71002407859449	1.61753546389546	1.6265207457821	1.57240170341395	1.36304011597112	1.55130123658327	1.44085849879395	1.3984250032886	1.42068954055969	1.39948320942367	1.33897989958039	1.36304011597112
4	30	0	1.72671893155228	1.63774432247433	1.62499725572337	1.57361193586524	1.373206541822	1.55097617923901	1.4261617966818	1.399568332928	1.42036819411905	1.38932475227295	1.34130017617702	1.373206541822
4	31	0	1.73784597635743	1.63795282315697	1.61696151435273	1.56182472119012	1.37826009635188	1.55189418735889	1.44223139643697	1.39052603305133	1.41191094092195	1.39869958288265	1.33339966199068	1.37826009635188
4	32	0	1.69076153644344	1.65454030133963	1.61758612836781	1.57575945225348	1.39324996376928	1.54261647583148	1.44582080612603	1.38849231361516	1.4139946430068	1.3919773441433	1.3450075205469	1.39324996376928
4	33	0	1.72405205046617	1.64171485965529	1.6019224878353	1.56950525121267	1.38940179301737	1.5301752668636	1.45255600349397	1.38064799863139	1.41800194435008	1.38145007397056	1.33851721887744	1.38940179301737
4	34	0	1.70158689556718	1.64118919783268	1.61472523839521	1.56494445067657	1.39489642950997	1.55230490660497	1.45538534404374	1.37128322284943	1.40535941813148	1.38637787493127	1.34425824381783	1.39489642950997
4	35	0	1.67980696561664	1.65722363857294	1.61193972982365	1.56856751455153	1.41798630855602	1.54134703416326	1.4525132140697	1.35930857587564	1.42808450054314	1.39878710461135	1.33816778867022	1.41798630855602
4	36	0	1.6801597940357	1.65797889504496	1.62000693429578	1.57057105901093	1.43277665567671	1.55221192396229	1.44136085108347	1.35605087455264	1.42186613115854	1.38400748656825	1.32951437809385	1.43277665567671
4	37	0	1.62113847527444	1.6701732897588	1.62539627614924	1.57314401827482	1.42137006918916	1.53238236519228	1.45041498175837	1.3697066447908	1.42167561197915	1.38224393902943	1.33626603604367	1.42137006918916
4	38	0.0902115750076135	1.63397582520486	1.67541685120385	1.61766162810297	1.56323519572227	1.43032253133963	1.52482531326309	1.45008878351942	1.36424704623552	1.41283131312306	1.39025336694481	1.33149569577133	1.43032253133963
4	39	0.248247001599209	1.61368819650225	1.69253675971979	1.65236692238055	1.56968340546083	1.43648222224716	1.52612920490437	1.45438731760849	1.36948887842892	1.42041369659046	1.39024074426966	1.32773435488144	1.43648222224716
4	40	0	1.82194455579599	1.69340204718764	1.63621177125898	1.56908874935712	1.43048118794474	1.527090388157	1.4632732600664	1.36238155485589	1.42126827233301	1.37412821990846	1.32292926898731	1.43048118794474
4	41	0.8390411124943	1.60890213190293	1.6674297627369	1.62611238315747	1.57839754097712	1.43903743290413	1.51680013576416	1.4845819230874	1.34915721629369	1.40716172582428	1.39004931996979	1.32808518042642	1.43903743290413
4	42	0.847426357178576	1.64373459193839	1.68141007283196	1.63961108140702	1.57061735030724	1.43711228287671	1.51085428861668	1.48773793492174	1.33971889754234	1.41120556265521	1.3838206708022	1.32390219375636	1.43711228287671
4	43	0.945486413699878	1.59313605263285	1.70809834269309	1.63836086217794	1.58354751684398	1.44642837097625	1.50559614855658	1.49144432650687	1.334794031523	1.40393164586516	1.37945656004434	1.32565024444986	1.44642837097625
4	44	1.56713817505015	1.54343411418183	1.73975933496931	1.63920347740936	1.57821141071529	1.45156049621681	1.49675611446661	1.49261158825192	1.33018011604219	1.42205360563713	1.36726037572401	1.31608860638206	1.45156049621681
4	45	1.12982409212969	1.59277235899243	1.76689166131609	1.64443036152356	1.57172634986465	1.4504155159975	1.50775648053408	1.49649248920213	1.32776616459923	1.40601355507956	1.38554843666832	1.32479536515772	1.4504155159975
4	46	1.18526130128351	1.61299080051233	1.70271971673328	1.63170513721339	1.57722419720468	1.47073425445778	1.50877262368987	1.48929812012967	1.32199947469843	1.41019395227862	1.38543539857905	1.31795456305733	1.47073425445778
4	47	1.15615994828687	1.58092502289267	1.70250645767057	1.64290125028382	1.5682423393121	1.47290753676897	1.50949490118742	1.50133415024963	1.32090997023664	1.40897179949504	1.37570367916794	1.32105637008603	1.47290753676897
4	48	1.18434438895243	1.58940621326348	1.71549262238797	1.62804943721647	1.56970596489743	1.49839179502251	1.49951169324403	1.51135683129378	1.33175553803615	1.403337972658	1.37951706149002	1.3257785218367	1.49839179502251
5	1	1.48652215455054	1.31484995540393	1.69416708389907	1.63002896757389	1.48103544173615	1.43158360778373	1.48652215455054	1.54462495713069	1.48504505055682	1.47945083259483	1.38937622791851	1.32864031524053	1.22874264608625
5	2	1.57787798789507	1.25898347775952	1.65353757061661	1.64103038488764	1.47108278028596	1.43577536858187	1.57787798789507	1.50625218106732	1.47741661295973	1.47635873129138	1.36904684709845	1.36647260765666	1.23853222465338
5	3	1.98209961782817	1.28143813567769	1.62556095452328	1.60367560442183	1.46937652978944	1.43600336639181	1.98209961782817	1.49212817246211	1.46864528930328	1.49755756855811	1.35635089323844	1.32919920960615	1.44644686947084
5	4	1.74250831528049	1.34356995458957	1.60431301540155	1.61914746595925	1.45528962721828	1.42660423764008	1.74250831528049	1.47642473157932	1.47852620884513	1.44895608166616	1.35665321030261	1.29087276002926	1.39204506020671
5	5	1.89879933607067	1.24572752855363	1.605464252441	1.57692224135648	1.4517055371001	1.42842850257144	1.89879933607067	1.47224935877207	1.4689251175762	1.48281474420134	1.35639394582251	1.36790713280782	1.33262384373004
5	6	1.97232368083262	1.26326038829378	1.58874008741568	1.59016862691242	1.4574616290434	1.42987006560092	1.97232368083262	1.46312961629497	1.46074501296035	1.44122163868562	1.35790767532939	1.34009590329978	1.33612037384425
5	7	1.78597172832456	1.26839837244246	1.5769424499647	1.58780044336984	1.45592153202264	1.42633448853666	1.78597172832456	1.44612495746681	1.44275070436895	1.43945829671727	1.34120168607541	1.28072121880753	1.3164362022104
5	8	1.63909258086288	1.23961054658556	1.57668753716581	1.5799391726215	1.45892716908427	1.43026190210075	1.63909258086288	1.44906003086333	1.45661993496558	1.43447664146678	1.3478061254277	1.27870104382014	1.32812730340847
5	9	2.06871692012421	1.26915649383178	1.58182743489495	1.57513076457913	1.45792697616972	1.42748237399193	2.06871692012421	1.43906498855715	1.4436324253829	1.43309099981001	1.35830633140138	1.2199074603944	1.31948737685772
5	10	1.80817831773501	1.27878062661768	1.57966418819121	1.58524486746776	1.45163970846338	1.428570002983	1.80817831773501	1.43377827305445	1.45211227257866	1.43829285406981	1.36655093445716	1.25603932304865	1.33130752474849
5	11	1.84947969984276	1.28932819580599	1.5805476577749	1.57743741540047	1.4578727343064	1.42969826406914	1.84947969984276	1.42480199794316	1.46271885438638	1.43283835124321	1.3419442949065	1.28843797150956	1.28383084704813
5	12	1.59469198301257	1.23018585445302	1.58074668478061	1.57502894864684	1.4494929698251	1.43404857891422	1.59469198301257	1.43305918746394	1.4557703330563	1.43319963671012	1.34652883267851	1.26620012062743	1.34423935353485
5	13	1.39756488959911	1.1976078422697	1.57445572946993	1.57949463701786	1.4624546561652	1.42925595024743	1.39756488959911	1.4339702638861	1.45274710720609	1.44482348913258	1.37341844890569	1.06895647797947	1.31554337068703
5	14	1.32158513647242	1.2019790454423	1.58646558784491	1.57030824412649	1.46312769123263	1.43233500855873	1.32158513647242	1.43981651571884	1.44523030433633	1.43883339245379	1.36467722751586	1.2861776789282	1.31172521680805
5	15	1.65592889433145	1.17895067466934	1.5874224373074	1.59120003347798	1.4598893438262	1.42936437227698	1.65592889433145	1.42697790843372	1.46488505867457	1.43840445201239	1.36932265055688	1.26615521840003	1.29473620249118
5	16	1.58882428117183	1.20531310388769	1.59114407337853	1.59355495911106	1.46298720371465	1.43954464986204	1.58882428117183	1.43035937719284	1.4646966881798	1.43920660395972	1.36561878670868	1.21683638845343	1.32274005249532
5	17	1.64776133284677	1.20412666383785	1.58328835709766	1.59176328028396	1.45584798542929	1.44274847836825	1.64776133284677	1.426797404497	1.46855468172536	1.45503880528399	1.37184517985738	1.21941821363965	1.32308676700551
5	18	1.38448829341899	1.1932303875812	1.583430525581	1.59788256752558	1.46076471170948	1.44464761806606	1.38448829341899	1.41894319759753	1.47076633060759	1.45197116497077	1.37481738205905	1.3632277400143	1.3198439892268
5	19	1.67316821887504	1.1780948071622	1.60671252562764	1.54397720507318	1.46009215424987	1.44687611382904	1.67316821887504	1.43073066441887	1.45409605428469	1.44000147504419	1.36759876851804	1.38440768892643	1.34336237047008
5	20	1.63563724807838	1.13479894091442	1.60228250850664	1.57827823403473	1.45783800800551	1.44959172693268	1.63563724807838	1.4320684396414	1.4630602108163	1.44682854080253	1.37063114725767	1.33620548956218	1.32222841626467
5	21	1.51004659120822	1.19378472153454	1.60203546059611	1.58229897187605	1.46016204614883	1.45494877992885	1.51004659120822	1.43509121516074	1.46429344291568	1.42982631793808	1.35219782957784	1.33353360884362	1.3500108858476
5	22	1.52956926195008	1.18803711225864	1.60478237103973	1.60326851112118	1.45184651618206	1.44461432741617	1.52956926195008	1.42764967637758	1.46721000101606	1.41487375229355	1.3489447253717	1.32518095158969	1.35720658162357
5	23	1.53732783553426	1.26493058060784	1.61421554166036	1.60929220235933	1.46117669151448	1.45053483207021	1.53732783553426	1.42573503200481	1.46002497634854	1.41649932104613	1.37577948006735	1.36009644168896	1.37583889303244
5	24	1.65107373363227	1.25265669630954	1.59764571979867	1.60562632191668	1.46491264347776	1.46207539109675	1.65107373363227	1.42539631086948	1.45418305829219	1.41720654626692	1.36470955067279	1.34302288239733	1.3847895274064
5	25	1.45613713633424	1.14281382190518	1.59987021517271	1.61118587758287	1.46732665855347	1.45544339873909	1.45613713633424	1.4209236266927	1.46163137979127	1.41214426233233	1.27718255114272	1.32224306779898	1.39670339004022
5	26	1.45287414957361	1.112518754786	1.58540834030005	1.63356738027096	1.45935038270531	1.45462999364359	1.45287414957361	1.43681113015494	1.46288642648324	1.40875158646564	1.41649801729097	1.3317242670729	1.3678968005762
5	27	1.27500869670783	1.08361936382404	1.58922607460381	1.60175332513479	1.47206370807029	1.44773685345735	1.27500869670783	1.41975257426441	1.45982850978171	1.40816790970691	1.4306955885663	1.33397095509303	1.38634355414079
5	28	1.30104173603519	1.05197687729855	1.60927439709376	1.62644325051299	1.47815983628755	1.45675438101497	1.30104173603519	1.42462701269596	1.47025907494672	1.40620267452092	1.35412310593519	1.38839942134138	1.38342633696078
5	29	1.28416972234363	1.07302441426791	1.59569111323188	1.62326075296801	1.47527741372622	1.46416055216817	1.28416972234363	1.42938476790878	1.45686239580424	1.40893120130062	1.35905718359867	1.36648123402304	1.41077759383908
5	30	1.26419663454574	1.16019762492569	1.59298572724041	1.60599098041241	1.47117680810291	1.4577701283931	1.26419663454574	1.42181788664444	1.45946777985114	1.404907493911	1.31186552806514	1.32594920883406	1.43527536204752
5	31	1.21564174079447	1.13018443840133	1.60132956842209	1.59828141551709	1.47314591338032	1.45914568214099	1.21564174079447	1.43014761087272	1.45296223187089	1.40518696518979	1.27601395110303	1.29382106886949	1.42706864923372
5	32	1.28153148086162	1.14764682994567	1.57188724392605	1.60458726635011	1.47711411157318	1.4613039212288	1.28153148086162	1.43851476732267	1.46156971888059	1.41135252949338	1.35124133867129	1.29429676566471	1.43339419506667
5	33	1.27860928909548	1.08153452910197	1.59284930934864	1.6045630206818	1.46982396790717	1.4562008875361	1.27860928909548	1.43251356844151	1.45059108697713	1.39717021268805	1.34740765901803	1.33103242197958	1.4483571201587
5	34	1.28433003897211	1.1493116043637	1.57054150221218	1.63357008037053	1.47588704594786	1.46501614872254	1.28433003897211	1.44560428537669	1.43311577385433	1.40798560128495	1.33667665245593	1.36659316831249	1.44910289598136
5	35	1.32210928136631	1.04387243026422	1.55642759363615	1.64921718072489	1.47932524351895	1.45580640840165	1.32210928136631	1.43794404768401	1.43918642856592	1.39537776648613	1.36083169593173	1.30522303773732	1.45743599088995
5	36	1.29639662479407	1.05112423802777	1.55426787240177	1.66370922218114	1.49695775238845	1.46495164969719	1.29639662479407	1.43139721298991	1.45168069963102	1.39504679651095	1.23049530805411	1.17720718461707	1.47579938451258
5	37	1.36146922532715	1.03220066092222	1.54000047162141	1.63252160843923	1.51497453874261	1.45332443541508	1.36146922532715	1.42625780385192	1.443710568625	1.37978850191369	1.32813203467353	1.31842690876022	1.47879888192208
5	38	1.33991110619293	1.04089170177101	1.54769097946078	1.62993108450737	1.52630832567897	1.44614995752501	1.33991110619293	1.43063338222926	1.44420007774322	1.39205361115993	1.34730949307949	1.36525197395069	1.48417935783148
5	39	1.33827684505844	0.9840182043607	1.55493487702723	1.60801253076023	1.55462166047224	1.44913042421225	1.33827684505844	1.44351245955145	1.43718869394465	1.40321392082978	1.47214176542459	1.45594980272509	1.48394670597925
5	40	1.36151857667415	1.32368585278215	1.54766798095677	1.62823347574807	1.53546493515807	1.45801225746459	1.36151857667415	1.43026402927296	1.4558833748554	1.39026392026818	1.45659187708566	1.411481125715	1.49652588871647
5	41	1.37661047370892	1.12776500650537	1.52252315484359	1.64899632255301	1.55385032360868	1.45166790977581	1.37661047370892	1.44179865142849	1.45004962860813	1.3827037580472	1.4146472868584	1.37817063803107	1.51144038168633
5	42	1.36941550485249	1.13750112525805	1.51161128232004	1.63004328578245	1.5495492727649	1.45253680709707	1.36941550485249	1.43620667873095	1.45021963513242	1.39914831854746	1.4529355814881	1.35704128035303	1.52881607666796
5	43	1.36309673520615	0.934333711193574	1.50792988734796	1.65168575241776	1.55368826144657	1.46340228510142	1.36309673520615	1.4400491479515	1.4396368729245	1.41063516068326	1.44502389440329	1.38985948882084	1.51796251773505
5	44	1.34277796011224	1.06785668707564	1.49806649148185	1.64057605881023	1.55636753726599	1.4645906840747	1.34277796011224	1.44695519653297	1.43680209358763	1.41129141271781	1.39547742741816	1.36541744185976	1.51797590580293
5	45	1.32999806414926	1.00210350061311	1.50349720654435	1.65053798394313	1.57519351047666	1.45241699208179	1.32999806414926	1.44590191858474	1.44377642876472	1.39968511131073	1.36642692740463	1.38349868500822	1.52033008879199
5	46	1.31157489111466	1.12471645613332	1.48552225266319	1.62882465341781	1.5852832045516	1.46280170958751	1.31157489111466	1.44754680237783	1.45697563516743	1.39657058565846	1.37574577118822	1.36616293506256	1.50708105170597
5	47	1.33278615117544	1.0630803922992	1.49886322788982	1.59609237917843	1.53901502624926	1.45342789624385	1.33278615117544	1.43337103970742	1.44938202363917	1.40863088112917	1.36121240058808	1.33871199628691	1.51396715964792
5	48	1.35150429756901	1.38169254411565	1.48886919427721	1.60872918906843	1.5546126758373	1.45818688912396	1.35150429756901	1.42529908104788	1.44345011969762	1.39333165848103	1.38893362395418	1.34748555016212	1.5142874365083
6	1	0.333877892270813	2.04383978427379	1.21644011112534	1.51223815455438	1.44556088569009	2.05778769790754	1.10691063013412	1.33043699430426	1.2919820172304	1.2864110506697	1.45545342256511	0	2.05778769790754
6	2	0.224594214435577	1.88742217741432	1.32350478695475	1.48094737776047	1.479672401604	2.24722141098318	1.10308601294745	1.34305972926217	1.27726129704861	1.28700559575922	1.24120974690634	0	2.24722141098318
6	3	0.251931202520208	1.83767533730404	1.2201276452551	1.4604726058607	1.47361920695325	1.95550313823309	1.1454875253435	1.31198223951169	1.27864981308169	1.24705179760732	1.23616277839946	0	1.95550313823309
6	4	0.830511913863562	1.67716723463147	1.1978580240098	1.49064435318722	1.42022437537294	2.11510747645719	1.14199589049071	1.29817217662416	1.28645601957703	1.2457706953464	1.32921955789633	0	2.11510747645719
6	5	0.762377546607121	1.69238013244218	1.18748005577891	1.49353267901485	1.52119979226911	2.20922220380866	1.13181414435047	1.29741220548261	1.27499496169739	1.22914949777936	1.22383158230437	0	2.20922220380866
6	6	1.01342897723807	1.94204336532362	1.18196155147278	1.53308559645991	1.45494965918945	1.90260806105802	1.12624888740514	1.28261064547526	1.28049534367866	1.2317226271212	1.15089590963284	0	1.90260806105802
6	7	1.29678806583452	2.11875668680284	1.16599987743503	1.48135693252126	1.5175926320133	1.85361922496457	1.12644417723316	1.25078880641851	1.27984323995379	1.22564599881879	1.35060617503574	0	1.85361922496457
6	8	1.21790720453895	1.98082174021904	1.29486121228568	1.46196739201067	1.44654227440414	1.79301126319238	1.12350319837654	1.26039321780852	1.27770273521273	1.23901838553865	1.19421251280036	0	1.79301126319238
6	9	1.52123750760104	2.11979254564368	1.27630570925402	1.42282010343854	1.47845684188796	2.09229158642906	1.10301622529581	1.2647621515935	1.27853836169424	1.22552130264128	1.36090863754192	0	2.09229158642906
6	10	1.52689858762119	1.99553031421387	1.4170786999502	1.49202467728739	1.46661395712403	1.88019664218897	1.08929084078658	1.25756477754599	1.26464021842508	1.23002800839785	1.23210667405969	0	1.88019664218897
6	11	1.52850016295297	1.89738613765536	1.13227061131004	1.46462665357112	1.50585883192403	2.17953674821453	1.11175551186228	1.24993653943886	1.2785294050569	1.22411936611732	1.20744240454107	0	2.17953674821453
6	12	1.74294594731497	1.77689810685922	1.1402399607042	1.47399556752092	1.46343523574789	1.95152319248653	1.10739300563982	1.27415906195805	1.2616739219308	1.2386513636946	1.25160033067943	0	1.95152319248653
6	13	1.61542582122251	2.09238121587102	1.42513410693683	1.47622322680385	1.4285477583913	1.8275316432735	1.11235830997352	1.27692785675069	1.25926421217613	1.23632396541709	1.24576978228684	0	1.8275316432735
6	14	1.6006790109006	2.06204693798704	1.49711107964359	1.50492809755746	1.47649868419337	2.13650394073061	1.11420265908583	1.2776080820097	1.26087479401009	1.23362462292351	1.33374773674334	0	2.13650394073061
6	15	1.57078585198393	2.15845633530027	1.51286125672215	1.51784058284394	1.44231409907638	2.01055076133787	1.1044584961618	1.27666762682406	1.27795557277216	1.23238332148458	1.29265664721667	0	2.01055076133787
6	16	1.64987987230778	2.27683893604545	1.510854644281	1.48500904557989	1.49178265830844	2.01748326073574	1.11844642432448	1.27280094824609	1.26717854498403	1.23657557324283	1.27047199778729	0	2.01748326073574
6	17	1.83752351044376	2.13471997305036	1.6367479544779	1.45634160919414	1.45800294171549	1.98447350391474	1.12756631364909	1.27205584266718	1.26197344565554	1.239759663537	1.27308212912463	0	1.98447350391474
6	18	1.58543154697739	1.89390972575315	1.51497632401862	1.48470592778736	1.45756575050514	2.01675786807361	1.14386303369294	1.24992334300994	1.25310139160927	1.24088808891851	1.23856306165162	0	2.01675786807361
6	19	1.74576627051623	1.66252083888933	1.63723252175168	1.46884146295005	1.4688000238553	2.15012584159808	1.14255864856627	1.26267978468987	1.24070987552942	1.2355631810006	1.25172464467236	0	2.15012584159808
6	20	2.38445703265788	1.83784210511213	1.59676656948318	1.47065634504391	1.48178844083164	1.83292150414764	1.15726056856977	1.23827397459606	1.23956175548515	1.24120413970334	1.23283115285422	0	1.83292150414764
6	21	2.22604280042695	2.01888990556098	1.63399638520659	1.50372942953887	1.46714101479726	2.01967190584111	1.17930521611084	1.24075173865932	1.25092233869181	1.2405234129633	1.35517258677553	0	2.01967190584111
6	22	1.98957562796945	2.0387618306773	1.59950421060176	1.51072540788041	1.47037891411348	2.02191822036667	1.18154524325273	1.23539482181139	1.23970197157123	1.24709813801409	1.42104014117415	0	2.02191822036667
6	23	1.82984808764111	2.06704391277152	1.66444163683146	1.4870816023929	1.45697571689304	1.93671212087399	1.19211496463765	1.23468958105055	1.23061650684534	1.2406071609326	1.39033810344251	0	1.93671212087399
6	24	1.58081592448572	1.90190190895271	1.61027059687663	1.53836854112788	1.53276189972079	1.94790852562127	1.19180755672204	1.24877550505079	1.23252645215981	1.23179616599724	1.7041998910205	0	1.94790852562127
6	25	1.61303461050087	2.13909957715115	1.6564046007021	1.56645978039254	1.52486094419435	1.73553155058226	1.1997974303928	1.23429435154083	1.22100093771087	1.23364159231461	1.41929155664258	0	1.73553155058226
6	26	1.60330189096197	1.9676797066332	1.55925656049509	1.53166153340778	1.47885711868619	1.22134315557416	1.19660470578537	1.238771735605	1.22581225379413	1.22840472745848	1.58198373759385	0	1.22134315557416
6	27	1.67483135338712	2.04246140678043	1.86144418366609	1.58228002335059	1.5711141142587	1.7453905090906	1.19559100961991	1.2274332496855	1.21548668599535	1.20939123162608	1.69126293632212	0	1.7453905090906
6	28	1.83625003767873	1.81506161415116	1.63218406346792	1.57672057912196	1.48008126776497	1.51102753525211	1.20665042909824	1.22184725888029	1.21858793058307	1.20621047365647	1.7586243453971	0	1.51102753525211
6	29	2.06029953201468	1.38539287067755	1.64502288151927	1.577705440726	1.49853642037098	1.45858042606763	1.20150030208895	1.21690459938891	1.21328843745774	1.19419724622705	1.76657289203485	0	1.45858042606763
6	30	1.66577245267841	1.19394570242544	1.84283571585159	1.60393592673002	1.49538532963	1.74095647371704	1.20276489216338	1.15174593246934	1.20630633287969	1.20107729775057	1.9311486885155	0	1.74095647371704
6	31	1.25281100325161	0.999863915463582	1.41496565292584	1.5838338974577	1.48470034646125	1.7933207212904	1.19417756748497	1.1002313986246	1.2140147148509	1.19485078997916	1.90729603941811	0	1.7933207212904
6	32	1.7416761155297	0.797957236113103	1.55960799628649	1.60749850316355	1.46316179462006	1.1288168948057	1.18052466194123	1.05175840211567	1.19704365012993	1.20816900647005	1.94374990310298	0	1.1288168948057
6	33	2.10373800873822	0.876565278071367	1.63331537061505	1.61221296846627	1.44937169500255	1.34325714552917	1.18536539833544	1.05228233488199	1.19897771564281	1.18634117106198	1.92285496934666	0	1.34325714552917
6	34	1.75877142945781	0.356689367906706	1.47867486174157	1.65918988788631	1.46154791741261	1.6043361603414	1.1891307705455	1.04318541398931	1.19564659987765	1.17876911932179	1.89740628986653	0	1.6043361603414
6	35	1.77403076517235	0.619675547188977	1.93446094099632	1.58257983645058	1.44722329975049	1.50148901134242	1.19221638137086	1.05948869518088	1.18614415201503	1.1824933937549	1.77449702439573	0	1.50148901134242
6	36	1.72101533571555	0.118974817790066	1.63796848169504	1.62227381210957	1.53690017601019	1.33034752463502	1.18860272982147	1.02085622232802	1.18870552012163	1.1854123520099	1.78604362336856	0	1.33034752463502
6	37	1.69357804411708	0.225753058583789	1.64714922097955	1.62214929359254	1.45503609412014	1.45262447042824	1.1879481153111	1.0306063556114	1.19401895506596	1.18339101910188	1.64497362482968	0	1.45262447042824
6	38	1.87506363060006	0.167432951474583	1.44711663066778	1.6569439437898	1.4951176369976	1.30140284210139	1.19358425308464	0.99662584718811	1.19273006252418	1.18042839866517	1.70963356819231	0	1.30140284210139
6	39	1.31119687637895	0.192828729076606	1.46840611708776	1.63008234184929	1.47220851805916	1.36842452108986	1.19620265042845	0.934845781670614	1.19038907749124	1.17754917999123	1.91271804749687	0	1.36842452108986
6	40	1.7345171035045	0.14546152760787	1.47885231265024	1.60922726315556	1.45637365710683	1.82599154424656	1.18524719326184	1.02412333833949	1.19926863811369	1.18208947100499	1.76747507099201	0	1.82599154424656
6	41	1.39610414949823	0.169251990826543	1.61161874270927	1.61532307498674	1.44868169812146	1.57497054144238	1.197408908135	1.04034347395918	1.20042439279098	1.18656474889513	1.62237849059891	0	1.57497054144238
6	42	1.31743951759723	0	1.5910003782202	1.67119733329769	1.4833962685481	1.25244924889824	1.20396968457276	1.0148853484998	1.20224618886445	1.17956828425787	1.53741509406543	0	1.25244924889824
6	43	1.47984576822576	0	1.68664836540171	1.65553641464112	1.43876962412464	1.30112039376083	1.1821277216335	1.02073407466629	1.19487001743558	1.18556503877565	1.40160767599244	0	1.30112039376083
6	44	1.10991277748637	0	1.6601862869245	1.66884607282923	1.43896567152442	1.40371843653289	1.19052739120571	0.995340006036784	1.21767319408311	1.1813693393421	1.47779270439851	0	1.40371843653289
6	45	1.27872118237267	0	1.74235839730076	1.76377306493265	1.47706959906314	1.31512359001838	1.19532048170489	1.02628865465998	1.24046185065383	1.19853747042133	1.35114277155786	0	1.31512359001838
6	46	1.06138522272258	0	1.78823656099544	1.68114979769859	1.48830236837771	1.41501769688651	1.17867208761939	1.01520160693825	1.24723051157073	1.20782318031055	1.40696943259117	0	1.41501769688651
6	47	0.985462701760342	0	1.58032488606897	1.63700396820067	1.46589868253461	1.23358910383428	1.19904339561621	0.986872387826412	1.24626952986077	1.21667898019082	1.50804930408625	0	1.23358910383428
6	48	1.3864323113188	0	1.9420929564676	1.63284802110722	1.47653409252547	1.48403615541155	1.21025215206997	1.00722470194769	1.2434328746659	1.21462622429112	1.71367945138919	0	1.48403615541155
7	1	0.500763664588505	2.04721967918413	1.94080604636217	1.97263895547762	1.88880032196568	1.83924281942435	0.500763664588505	1.85040796277472	1.98395109129703	1.92225725389955	1.7929583815336	1.72756864089988	1.60571151426395
7	2	0.813113834105877	2.06380833999296	1.96734408701117	2.01165246319584	1.84506952004116	1.83247059789728	0.813113834105877	1.84086720096945	1.939989732328	1.89352975344075	1.76405654013425	1.77858722672976	1.51104986613463
7	3	1.11695844989219	2.01789923719046	1.9270498260043	1.93659285519791	1.83846066511611	1.84299337638392	1.11695844989219	1.84166813089696	1.92389535513397	1.88050501998953	1.75483832886786	1.52705022429186	1.59514682686453
7	4	1.81140587691462	1.98161959570591	1.89550720114765	1.93149867231082	1.82914757437724	1.83114815396603	1.81140587691462	1.83790024105674	1.90667101838936	1.8711110639212	1.7518093352701	1.66448812223457	1.70881777701758
7	5	2.09153991790197	1.98627161639982	1.88876322444725	1.91786666630843	1.83681624229981	1.83048128909546	2.09153991790197	1.83671131263742	1.89607528300049	1.86818423869574	1.74725431900468	1.68603406131093	1.43811027809437
7	6	2.4428559699497	1.98242581641451	1.88241257761287	1.91132269939818	1.83124809803818	1.83628833757261	2.4428559699497	1.84765464546606	1.89710702216283	1.86473207629965	1.73803699542937	1.62167587984076	1.63882354594133
7	7	2.56394234688803	1.97255188360409	1.88836744169988	1.90694071208336	1.83148782139829	1.82435150005492	2.56394234688803	1.84920189539769	1.89922210381894	1.85111159565047	1.74566282876741	1.70217756943944	1.63107069231443
7	8	2.79899079292255	1.99438819547878	1.88262639638808	1.89849556648688	1.71519303063639	1.83127182108123	2.79899079292255	1.84725056213518	1.91494427426221	1.85721113917213	1.73341611774434	1.66727522469154	1.60976400149844
7	9	2.86198561095276	2.0206247205655	1.88200575108223	1.9072923614893	1.74760775007802	1.83094799295321	2.86198561095276	1.84784461739665	1.90374781355342	1.87062040041519	1.73714044224459	1.65143345102797	1.59704235778811
7	10	2.81402404399639	1.99353020881282	1.88615403212178	1.89987147229278	1.78806077977116	1.84301971667913	2.81402404399639	1.84849293346235	1.91030936633701	1.86610632124277	1.72719229191942	1.66789258434007	1.61613768518587
7	11	2.95165801413857	1.99347827344753	1.87963529917374	1.90709264501511	1.8064883181478	1.84566951176639	2.95165801413857	1.85253536586827	1.91407285639403	1.86209658100599	1.73052145224751	1.67088514732112	1.59069704106632
7	12	2.9258747945839	1.98666033264407	1.88682972164253	1.91281760429442	1.82545151526917	1.83356572267815	2.9258747945839	1.84956984393969	1.906677054811	1.85155994152735	1.73147710632054	1.62808327070164	1.61779897915708
7	13	2.8943992791216	2.01130820729293	1.88088581359932	1.9095670086431	1.82738163656427	1.84927455056138	2.8943992791216	1.85365581418303	1.91679738893763	1.87135527102232	1.73513760458651	1.68364726966349	1.63230010034279
7	14	2.76922471514219	2.0064870969982	1.88974129863746	1.89932183980123	1.82289929123796	1.83913241818877	2.76922471514219	1.85441337055079	1.91677462481022	1.85185683807566	1.73829199732464	1.66501015227765	1.60017680220301
7	15	1.41416732769678	2.01272183010094	1.88916805273397	1.91289952572634	1.82300271927445	1.83441244655122	1.41416732769678	1.86298976303831	1.91469520911449	1.86106688959998	1.73351411581868	1.66655786294708	1.60049764213857
7	16	2.71294734966039	1.99928570673475	1.88477652311478	1.91167127286657	1.82988715147287	1.83586349428918	2.71294734966039	1.87758489566488	1.91897155143581	1.86053042881508	1.7290786822233	1.67372304568182	1.58019417086979
7	17	3.14326251396355	2.00068440426782	1.88592409026207	1.9129184708126	1.82211419381478	1.81145885053774	3.14326251396355	1.89888879688267	1.91182961349218	1.8655601158595	1.73666220982764	1.66558204666957	1.56785913459717
7	18	2.62113278948003	1.9931158437787	1.89180610166215	1.92521262429379	1.8300563615768	1.802971832613	2.62113278948003	1.90242804220379	1.91526654013883	1.86777643718291	1.73792771384977	1.66936580391078	1.6147175242156
7	19	1.8299944363089	2.02822841445039	1.90238553852336	1.92613098254759	1.83523852900374	1.8059146839085	1.8299944363089	1.91484458994676	1.91394702572264	1.87304793051829	1.7371012093076	1.66818688544522	1.58377156018018
7	20	2.95323601027858	2.01385687077827	1.90618365296682	1.92627170653177	1.84087594384748	1.79691926791	2.95323601027858	1.9232421780919	1.91529561068287	1.85989357802427	1.73537066803236	1.67275206907958	1.58760113916112
7	21	3.5962832150766	2.01458793307873	1.9143833977256	1.92978799247405	1.8418994715059	1.80035513198491	3.5962832150766	1.935060384725	1.90255081883689	1.85881509774649	1.72465310736138	1.6744254597	1.62383775365953
7	22	2.45595583221724	2.0110231230696	1.9032384513103	1.93174099355282	1.84724772882866	1.79113039800029	2.45595583221724	1.93335413208759	1.90631169610023	1.85841199345196	1.71028041437797	1.6943554543984	1.57130254808217
7	23	1.60734012224241	2.01733016560291	1.91066657553461	1.93181074450035	1.83802382911715	1.80985882760109	1.60734012224241	1.94176963124548	1.89942745205985	1.86196393634675	1.72372021103969	1.61930663104037	1.58018664277557
7	24	3.36941995607416	2.01803962622514	1.90197200828325	1.92153174813539	1.84068948777368	1.79611344449893	3.36941995607416	1.94838472586104	1.89601360093764	1.85636118542465	1.73496625761608	1.68479584908001	1.56270375492406
7	25	2.84289093647466	1.99840501402973	1.91797082697903	1.92500030575898	1.83791538403119	1.79008245474991	2.84289093647466	1.94534640119678	1.88881104045355	1.82817233571845	1.73319994874195	1.67233312963397	1.55180115528964
7	26	2.51300717625204	2.03592108510701	1.92577876988071	1.92330611289119	1.83727355590431	1.78738981985015	2.51300717625204	1.94902318185018	1.88969396679754	1.82403831972802	1.70607224560897	1.66118942399305	1.54305193527878
7	27	2.63818432652199	2.01062355578886	1.92273369334362	1.92221159415172	1.8271648817031	1.78145922250358	2.63818432652199	1.94297625853339	1.88710442887452	1.806952917706	1.70254598709006	1.66332412269541	1.56108557912772
7	28	2.22483588063626	2.0191871732747	1.93105718771292	1.93071203461728	1.82919581219817	1.78638685166987	2.22483588063626	1.93388070919932	1.90186149892424	1.80164886976693	1.71275062897708	1.6662313130134	1.55008233618602
7	29	1.98114489782076	2.04462144597532	1.94227336931525	1.92455966576654	1.82915936456014	1.78594399253405	1.98114489782076	1.94757950809259	1.89576523429464	1.7979143398152	1.69783463598257	1.66495935747542	1.59366630477756
7	30	2.40685636040175	2.0670528353674	1.95313862728865	1.92285017666922	1.81947131953003	1.78917096376221	2.40685636040175	1.94888526632857	1.90112678259156	1.79120693400854	1.69583742046015	1.69020554909986	1.64239061349349
7	31	1.70851619561959	2.11324228002847	1.91928946251968	1.92834475292495	1.80946235389595	1.79240245743419	1.70851619561959	1.94259760683769	1.90766816813716	1.78334929159686	1.70740789170016	1.64097977292691	1.62433894954459
7	32	1.37474545449615	2.13498750514785	1.90809367520219	1.92906198055662	1.81191014309507	1.78095895535448	1.37474545449615	1.94770541054214	1.89533981429436	1.79188534151972	1.70840549223816	1.6721913119142	1.63405240830937
7	33	2.65265859189389	2.09767581580476	1.92944663057551	1.91977202603029	1.822194124326	1.78985696430987	2.65265859189389	1.94744399355253	1.89144319479402	1.7871513888273	1.71106839090545	1.67733360815614	1.6287617940577
7	34	1.43757523998035	2.12835420304355	1.91523306248326	1.8669099114405	1.82363209775345	1.78833588340927	1.43757523998035	1.94540010233603	1.87700842490498	1.78234810293203	1.70911957613578	1.65925225786055	1.67129508395439
7	35	1.40130677421481	2.09225238476306	1.91704563276306	1.93002494113948	1.81930130160297	1.78546792031271	1.40130677421481	1.94580175175612	1.88799709173929	1.79334395034208	1.70183864779227	1.67362253341282	1.69008914541874
7	36	1.40852170570413	2.13362393313914	1.91035769987595	1.9235606303837	1.81748769422234	1.78597994295468	1.40852170570413	1.93432933509536	1.8831585389147	1.77834656613889	1.69445664443595	1.65693217567171	1.71864672416323
7	37	1.43655995334263	2.14195829051117	1.9311455643394	1.92855769672944	1.82753722859402	1.78689356774469	1.43655995334263	1.93664999408741	1.87887506883294	1.76987709691869	1.68885299267875	1.65349875020771	1.6943231552812
7	38	1.75282843048492	2.19429505605822	1.90971046131871	1.91067611993172	1.82626096363673	1.78509370980272	1.75282843048492	1.945270906438	1.87607051627884	1.78222281203501	1.70914193329272	1.69090984565968	1.69015901339103
7	39	1.4370987735164	2.0890391790301	1.9176137986621	1.9062851321215	1.82364619615207	1.78441911998065	1.4370987735164	1.93595689551891	1.88117831194821	1.77107022416812	1.70444681333283	1.64102241847544	1.69382216282246
7	40	1.45851574406393	2.11688599207364	1.91177949411936	1.90767170320781	1.82508948654146	1.7941743530859	1.45851574406393	1.93073596937782	1.88510055649527	1.77531545559737	1.69657098297374	1.68171725847458	1.71727682139809
7	41	1.54335439367913	2.16167648824609	1.92523317517639	1.91444379790355	1.82430227619899	1.79205866059585	1.54335439367913	1.9285513178782	1.89185864599383	1.78056281513718	1.69226457112889	1.67170735527394	1.72858984567262
7	42	1.52803471392669	2.1395105309223	1.93705566582491	1.91518366676897	1.81357542643179	1.79102813852426	1.52803471392669	1.92687904883249	1.89244885187668	1.77845584017035	1.69999409619312	1.66261837396969	1.73045068943146
7	43	1.39678309981946	2.14916187479466	1.92917790852002	1.92440460585642	1.81454644363175	1.8152588493833	1.39678309981946	1.92457788198987	1.89348198791738	1.78431245756559	1.70628496678538	1.65993917501959	1.74639964732181
7	44	1.53204026355702	2.15855395659609	1.91663719057232	1.91035890717578	1.81766553337676	1.81797811350811	1.53204026355702	1.92678351518019	1.90422685483792	1.78319082843454	1.68598055454826	1.68856329730022	1.76356532689498
7	45	1.56575421302334	2.13338063849318	1.90978904243687	1.91302889164316	1.81270853336047	1.82117871265867	1.56575421302334	1.93147781788621	1.90224028270328	1.79514968649619	1.68866724940983	1.65251477627828	1.77344556573465
7	46	1.56851981532672	2.19468436251667	1.90069478915685	1.90533088733341	1.81113921197461	1.80987691385381	1.56851981532672	1.91837466569661	1.89623200858568	1.78961768867285	1.69417013843172	1.67581293400884	1.76320511372488
7	47	1.58199374731426	2.10414092338466	1.91536360892852	1.90060705810541	1.80605175376488	1.82336579695702	1.58199374731426	1.92498835692282	1.89738942980382	1.78931789833375	1.71569571717408	1.6850845852346	1.77796245960554
7	48	1.5924920477156	2.97907458058155	1.94838889429054	1.89915173864319	1.81262354620905	1.81207656007911	1.5924920477156	1.93104050616877	1.90272292927968	1.79563714087278	1.70510265716454	1.35604019132389	1.78052993890557
8	1	0.356541829487439	0	1.41819850476501	1.33298720719536	1.38286152821489	1.34109065515873	0.356541829487439	1.19582312873687	1.48564321447663	1.1997410687618	1.25397894429655	1.32807503765481	1.24245391939012
8	2	0	0	1.39634209726533	1.33685982248526	1.38016167169753	1.35540707073774	0	1.17987941007811	1.47696504627355	1.20039927786351	1.22814117939388	1.28511398999309	1.21051823473137
8	3	0.167356700395642	0	1.38733017143944	1.34003397452778	1.38175036675059	1.33889263162331	0.167356700395642	1.1920651175357	1.47100533951678	1.21588732762791	1.22843820447852	1.2969287872504	1.20829808219047
8	4	0.771754250729301	0	1.39444664067864	1.33265592043399	1.38860843815701	1.34308654070141	0.771754250729301	1.19486608433592	1.46514908638977	1.22886510824605	1.26664439572038	1.26628335564682	1.22296399471893
8	5	0.591297100814731	0	1.38937192439667	1.33521744160574	1.38481237840901	1.34748007679627	0.591297100814731	1.17688587497431	1.46728146379609	1.21394745693587	1.24430745556653	1.27251437808774	1.21946236363745
8	6	0.788004093748748	0	1.38897421057452	1.3393913764461	1.3656803162499	1.34762257188454	0.788004093748748	1.17685562422616	1.46381465865069	1.19729627148414	1.24464563456556	1.30240546069493	1.2118444929028
8	7	0.825084016003128	0	1.39353531206714	1.32040212946168	1.35959558459751	1.36043513131268	0.825084016003128	1.16472087975142	1.47228978373146	1.20117265009389	1.2373768544385	1.28034683053674	1.21695421617426
8	8	0.891465317924313	0	1.37900727939483	1.32454539219878	1.37311388622724	1.34903465988423	0.891465317924313	1.18449891224213	1.47260247865225	1.20868869493598	1.24557013768079	1.31801796016378	1.22058095306524
8	9	1.07717234061293	0	1.38544420466045	1.30543531564002	1.36175263198488	1.34002761800148	1.07717234061293	1.18226242569644	1.48037495729367	1.20052092609426	1.26402737786278	1.27726068316328	1.21289229561335
8	10	1.01871500098155	0	1.39449214832974	1.31828786314151	1.36556572829208	1.35067986836026	1.01871500098155	1.19041993336741	1.48310742747068	1.18375802268416	1.22925510452255	1.33319211981281	1.21407301335916
8	11	1.32459054751253	0	1.36437850958592	1.32630409329005	1.36958063786538	1.34655811151347	1.32459054751253	1.1860106234572	1.48210073149055	1.21944620356222	1.21350792783467	1.33759475827933	1.20053167010523
8	12	1.3008142365426	0	1.3800032291724	1.32470777422076	1.35980031534542	1.36454060414817	1.3008142365426	1.17456978659594	1.48725843785278	1.20546277967633	1.22112841739586	1.28649837835117	1.20019977404546
8	13	1.33137009945911	0	1.36050851844114	1.3233751977596	1.36773895648152	1.37657798664908	1.33137009945911	1.09871186588851	1.498794816279	1.20301751934605	1.23155737174584	1.33781408785669	1.21078457249491
8	14	1.32014758092042	0	1.36463852931889	1.33402631346394	1.37352092486157	1.37458655067659	1.32014758092042	1.07177010571039	1.50958772424991	1.21346355153319	1.22600106176818	1.30951221218865	1.22517028423321
8	15	1.52563876892308	0	1.35476082274088	1.31572091164604	1.38058018468106	1.36110530248701	1.52563876892308	1.05430892349946	1.51887362858226	1.22487052142127	1.2371933824996	1.33436151609546	1.21429034298317
8	16	1.54076305462637	0	1.36737641925581	1.31696998441734	1.37528138706461	1.3633182188707	1.54076305462637	1.05608791379479	1.51058690617184	1.21159468950427	1.25470677581029	1.49674221986035	1.19956977288328
8	17	1.64948170756092	0	1.37170082441254	1.32286264433388	1.38569232217478	1.35844271626451	1.64948170756092	1.07660518795955	1.50295710032542	1.20827595601865	1.23715957775107	1.31334535593933	1.19254424640927
8	18	1.82281596838144	0	1.3733515780493	1.32484998102592	1.3762512344448	1.37142143408163	1.82281596838144	1.02824522660893	1.51516395901084	1.20994841266503	1.21541116923649	1.32382077617468	1.19810121708054
8	19	1.82916201057984	0	1.38361666988311	1.33988018706358	1.37515059703809	1.36987321746875	1.82916201057984	1.01109006904443	1.5162247860789	1.21770063794988	1.20422070922488	1.32060534119789	1.19001912671773
8	20	2.03605810751591	0	1.38785392746835	1.35166797329311	1.37931393761339	1.37827916987194	2.03605810751591	1.01130472903259	1.5147780938254	1.22193921608649	1.21430046602212	1.34779850622325	1.16724264810542
8	21	1.98738975297029	0	1.37446104877252	1.34284601687006	1.37042220899545	1.43021332101022	1.98738975297029	1.02068889478219	1.51477283881838	1.21337926302293	1.22586166805361	1.31138964394275	1.18504406157074
8	22	2.16443431544203	0	1.37135646650818	1.34295015457505	1.37686302250504	1.40114573562679	2.16443431544203	1.01681498615522	1.508976980257	1.20020413800041	1.23385520867258	1.35582900091248	1.20627921654636
8	23	2.20540110438015	0	1.37743076236274	1.3515504923924	1.38460732807502	1.36755938539611	2.20540110438015	1.00889125100973	1.50857443491412	1.20317475217525	1.22589130677042	1.35409750619318	1.2080542250655
8	24	2.20228012204418	0	1.37339402264901	1.34552319922781	1.38256240068229	1.36250577783545	2.20228012204418	1.00358195289345	1.45420639522255	1.18614866118238	1.22855115386382	1.36888685163603	1.21769956289746
8	25	2.63249527396968	0	1.39068567622245	1.36632353359192	1.38352407111434	1.36130805019518	2.63249527396968	1.03419922954127	1.3990841669392	1.18746245410538	1.25126534684004	1.36582518679212	1.24040654939224
8	26	2.61327038440496	0	1.3933842173951	1.36937676165119	1.37824324631602	1.35786672125596	2.61327038440496	1.03816344692129	1.38905185880694	1.18751313687554	1.25196246529361	1.35059533050368	1.24927611581308
8	27	2.71622375546238	0	1.40353851742461	1.36480152406477	1.38984868883466	1.36036471996242	2.71622375546238	1.06725482494874	1.3856130605881	1.16872156388942	1.2270852113514	1.3794749103166	1.2772168590664
8	28	2.69734248754217	0	1.42297418898618	1.37270810588209	1.37789745709012	1.36143938188461	2.69734248754217	1.05261027941164	1.38401405465497	1.19809472237802	1.20451278861149	1.38058712719543	1.29442877440233
8	29	2.90041077614306	0	1.42802325774207	1.36993665931882	1.37881801988425	1.35611163527635	2.90041077614306	1.05398374472793	1.36913265492779	1.18226620908344	1.22420021790262	1.36063932019964	1.30669840980145
8	30	2.67275977554948	0	1.43755135076268	1.37941622207879	1.3809064397023	1.35533825292499	2.67275977554948	1.11023089849086	1.38076651018949	1.17043915960468	1.22648552315856	1.36197285047635	1.35540689652052
8	31	2.77153927649929	0	1.41749222430283	1.36904899009584	1.40974208897046	1.36169813924675	2.77153927649929	1.08526703782145	1.36231462377353	1.15962079663172	1.22142690263181	1.35940055670831	1.37708505990703
8	32	3.0306593959362	0	1.41364389067168	1.38059171526331	1.403312618421	1.35820360416311	3.0306593959362	1.0765660943531	1.33801041140388	1.1704762635723	1.20769007273154	1.36155132683427	1.40008463545841
8	33	2.02617811174	0	1.3873169069495	1.3862157759037	1.41375232723475	1.36668016816734	2.02617811174	1.07961050665676	1.33211625787122	1.18942607693267	1.20820724502733	1.37684587784769	1.41560119959661
8	34	1.93848868133596	0	1.40235450115654	1.38727202447102	1.40404908988399	1.37402589476937	1.93848868133596	1.07058802369632	1.31481368003552	1.1688688243797	1.20037485037015	1.36899564831341	1.43451998778656
8	35	1.03591385107689	0	1.41701962072487	1.39678434800514	1.38623208636292	1.35655722566916	1.03591385107689	1.07979920659886	1.30678628647786	1.18261386028941	1.20053827888286	1.36446555649152	1.44138620089206
8	36	1.08590117029072	0	1.43999959016946	1.47168637999744	1.37428647962647	1.35844999917821	1.08590117029072	1.08426830665835	1.29581812401199	1.16773710422686	1.14838675854041	1.34296801890849	1.47788464002535
8	37	2.11514814993595	0	1.44301765386151	1.55415738742183	1.37786057013271	1.37711663457553	2.11514814993595	1.09203650031014	1.27623272179188	1.16598107969764	1.18106832531586	1.33742845236966	1.48392665168224
8	38	1.0177091468089	0	1.42487187077989	1.51575852254374	1.38075122720223	1.38364806081701	1.0177091468089	1.10499798478978	1.27762744881098	1.18149021574651	1.21146510614251	1.33653862618553	1.39913028812573
8	39	1.18988273790691	0	1.39251422655748	1.52727313338772	1.39665593770927	1.38015324394115	1.18988273790691	1.10809850230016	1.26859583520683	1.15994938429786	1.22542168354021	1.33852523469808	1.48744085514819
8	40	1.21443785863008	0	1.38865695152778	1.50834071170813	1.39439682349627	1.38285336625679	1.21443785863008	1.11286226367511	1.26010767521531	1.16849404514437	1.20434336605699	1.31645965174016	1.52192771931248
8	41	1.45964998635278	0	1.78440959701905	1.48385271867227	1.39627953657323	1.40323123321126	1.45964998635278	1.09681265636018	1.25192141788888	1.16119382642111	1.17279162716639	1.31021327519054	1.52574137389669
8	42	0.829589978902453	0	3.49661105122633	1.45862152771422	1.38862354347188	1.39769328104846	0.829589978902453	1.13277769856639	1.23525466873094	1.16671347476322	1.16842709646414	1.32007296052661	1.5325721037535
8	43	0.885524292494883	0	3.64194338548558	1.43590803734926	1.39170599628224	1.39270649767702	0.885524292494883	1.13885570566017	1.23845590725059	1.16847243745791	1.18077555093746	1.32056709068377	1.52913631813336
8	44	1.19049338223159	0	3.8766582210456	1.41635899648817	1.39201797863787	1.3923790449407	1.19049338223159	1.14476464395777	1.23230642702641	1.17337867344238	1.19835568535898	1.34583949266401	1.53835209908445
8	45	1.31407000113341	0	4.0409768094191	1.42048559567609	1.38378009389913	1.40318162986494	1.31407000113341	1.15479032036323	1.2307769406568	1.18912290958844	1.18561593730579	1.31432861193388	1.53563190151895
8	46	1.64527386194371	0	4.23033115764142	1.43344723997572	1.38723634253557	1.39705454910372	1.64527386194371	1.14485244491645	1.22711407458918	1.17917948526337	1.19583773888644	1.31518493507628	1.55677473431859
8	47	1.48457811006167	0	4.09066961596547	1.46607459128952	1.38265032883621	1.39420692146056	1.48457811006167	1.15151294756042	1.19806018618583	1.20991489838654	1.17719032958615	1.31188787444517	1.56445952448855
8	48	1.61721803669314	0	4.31031605535114	1.42919348411746	1.38861285176208	1.39139018817447	1.61721803669314	1.14982888300581	1.20632910295037	1.22342996026361	1.1900048058986	1.30373161644796	1.56517327576209
9	1	0.539858285466824	1.33484696979689	1.23638641251654	1.1890612519136	1.1849169711714	0.861831726323944	1.12330394326278	1.36646879692276	1.22003931572155	1.01173498601244	1.06491575021601	0.891712921861506	0.861831726323944
9	2	1.17964567322844	1.39271706444674	1.232075463869	1.19439286258805	1.18899869130513	0.824110396799315	1.10998448648258	1.18795554110977	1.20418693420285	1.07694543558869	1.0543990420927	0.90468139139294	0.824110396799315
9	3	1.13748837800104	1.34804910496028	1.24189054343971	1.18463019464119	1.18043070894814	0.826686291984537	1.1287050159124	1.18043719241233	1.21525173249906	1.05425183410224	1.06520103645943	0.908131923215966	0.826686291984537
9	4	1.19961909101533	1.32322932954142	1.21852032519533	1.17966155655576	1.18141007836215	0.875208775144262	1.13531192134781	1.17113902653448	1.20254328797109	1.03900552870124	1.07975794824315	0.918709790894116	0.875208775144262
9	5	1.14631794313745	1.30998849979594	1.24300157637091	1.16818222679335	1.17336434895918	0.903898484505963	1.13014184814201	1.16372732114475	1.18659101158174	1.00398506947891	1.08551452886656	0.904098485093311	0.903898484505963
9	6	1.28280122046952	1.28438678141764	1.24960665746571	1.16861576400777	1.17951882729482	0.897048607532035	1.13717493112786	1.1702565014278	1.19311804715582	1.02140902685145	1.06450759225376	0.903457769217783	0.897048607532035
9	7	1.39098881793556	1.24495421886438	1.25261452892375	1.16692652184543	1.17678507424854	0.886527248369073	1.14473979652025	1.17016181350406	1.17879258043159	1.12821741479703	1.05090627393644	0.908036799495358	0.886527248369073
9	8	1.44982168888681	1.24316582587177	1.2336360386102	1.1573990263313	1.17458070533382	0.884648805483879	1.14793329389145	1.15797890093499	1.1915457379037	1.09147329796579	1.03902242709036	0.899237215604519	0.884648805483879
9	9	1.45138880520063	1.18579036741677	1.22648056257717	1.16504776591436	1.17592162240905	0.870536293755585	1.15089545049911	1.16136566055162	1.1627187779889	1.05294114991038	1.02434501097744	0.891041032355622	0.870536293755585
9	10	1.4696914742622	1.29954028241808	1.22360985875633	1.15422931098839	1.17603960612251	0.863322847912394	1.14313568812113	1.16638478644649	1.17700184210711	1.10008649171694	1.06243313845953	0.930460095243875	0.863322847912394
9	11	1.48441655349161	1.24563999813838	1.26017690452782	1.1631569936131	1.17428804187473	0.875468178612126	1.15086615710402	1.16044108966816	1.19908553028955	1.1093454878185	1.01212694448703	0.925151355649739	0.875468178612126
9	12	1.72194276952115	1.26718291766329	1.24223919800252	1.16575496591583	1.35312223167125	0.878266475269154	1.15428427139395	1.16187718885705	1.19502932158309	1.13873332656659	0.994689303951533	0.908066303113755	0.878266475269154
9	13	1.95464079194561	1.21731997249292	1.23469302358061	1.17592557333102	1.17557739656794	0.89313117083795	1.15558267265796	1.16495361064889	1.19549378472187	1.13830146851497	1.00243686636984	0.886932691266083	0.89313117083795
9	14	1.66581546046802	1.20988476439831	1.24232459118562	1.16760542623653	1.18218496574648	0.883547002021489	1.16047717916854	1.16204924335393	1.19834662197286	1.10139194854455	1.03903847903685	0.889064842703712	0.883547002021489
9	15	1.82864289800078	1.17983586245659	1.2228174900149	1.16063873373629	1.18623181424532	0.851406984365197	1.15129453962717	1.16634373552149	1.20060764041821	1.05838197846126	1.03524096670196	0.896291286092973	0.851406984365197
9	16	1.87352005531466	0.992220797689273	1.23005761516473	1.16253187171108	1.18647947170738	0.831313813546293	1.15134004227	1.16602423845934	1.19147283067767	1.05896239120557	1.03839685949091	0.872930255861474	0.831313813546293
9	17	2.29122811761696	0.819768236826548	1.23565612376323	1.16599598566915	1.18029920100847	0.856910369681593	1.15842884064251	1.16129918829601	1.20445799867783	1.07634163737585	1.03257071427788	0.847727459348491	0.856910369681593
9	18	2.10426337212864	0.83745953577919	1.26260452932982	1.15815267939664	1.18525586268661	0.896916154686355	1.15320410318725	1.15984008159098	1.21624269893723	1.06325350524706	1.02456434497105	0.846108290416528	0.896916154686355
9	19	1.55902776927932	0.931017674847292	1.27374677061644	1.15945153879062	1.17976323437526	0.858206522264706	1.17289869422871	1.14416737667569	1.18780256832178	1.10392965965376	0.99917344937526	0.857404272207706	0.858206522264706
9	20	0.954550565192411	0.921486491151162	1.25715088757603	1.16118416013957	1.18213177705382	0.858603076920143	1.16526853721465	1.14283742914336	1.19079895083068	1.11627223929387	1.00082025591597	0.83293325357843	0.858603076920143
9	21	0.952204513140257	0.893607338583876	1.23808564204093	1.1613326358346	1.16724022482168	0.857793145263026	1.15745167375005	1.14265160295767	1.22152676455636	1.11914538698743	1.02730460805421	0.829467040742188	0.857793145263026
9	22	0.952618540054233	1.13203190321439	1.24662421821221	1.16240824153669	1.19072265690576	0.872494387798753	1.15886212471106	1.14595245298292	1.18171055122649	1.09644040155573	1.02543893958615	0.836809324771197	0.872494387798753
9	23	1.18597624795072	0.906083788598513	1.25208494088919	1.15685866917993	1.19770998858315	0.901393643825585	1.15759866975751	1.14341871206718	1.18379931149717	1.03578022510197	1.0418406513518	0.851570769180685	0.901393643825585
9	24	0.895370582599705	0.903697454725019	1.25773897007929	1.15421891469021	1.20732543790439	0.857925331449863	1.15818589885342	1.1475908616244	1.17296331224211	1.03715419616098	1.04802132046104	0.876154127896092	0.857925331449863
9	25	0.84616109839177	1.47245984968867	1.25278528695441	1.15656507322343	1.19730692511599	0.860426491799185	1.16229436095962	1.14097343713049	1.14707897456958	0.965872976749962	1.03507597435685	0.855725709984624	0.860426491799185
9	26	1.20827835742614	0.912644098168503	1.25243608809728	1.15710216781276	1.18966701740458	0.87119338203035	1.15947282276519	1.15000544847284	1.15710521890056	1.03637515313329	1.0453312787228	0.875790726476207	0.87119338203035
9	27	0.829499429624539	0.868524400399298	1.27423320657623	1.15590975299588	1.19416840464541	0.856369466787303	1.16650102329147	1.14406996420954	1.15175480202829	1.04327162059413	1.0331773879185	0.881081941434798	0.856369466787303
9	28	0.834014106635446	1.33905046737733	1.30127057907239	1.1565520028752	1.18799330643457	0.827068887717263	1.16240496636681	1.15279081990214	1.16675835099282	0.964621374588546	0.997639436238964	0.889526968056989	0.827068887717263
9	29	0.820706580922968	1.31747554551982	1.2772432956194	1.1582511608373	1.19442405032083	0.802183417145357	1.16098128272177	1.14316355354864	1.16186906845623	0.896599393536603	0.959741852802413	0.884694113152407	0.802183417145357
9	30	0.824615843631826	1.50218550917717	1.29876759424093	1.15551060611185	1.18719461308153	0.787784229974412	1.17159031143213	1.14118469391577	1.15090805789785	0.964151429810216	1.00042040964746	0.888777393133109	0.787784229974412
9	31	0.790103613643316	1.43008557340722	1.28958518206131	1.16659088948287	1.19300222787485	0.813114652243034	1.16103249751746	1.13509649276729	1.14298622898798	1.04326028152498	0.934149637471142	0.878373657571953	0.813114652243034
9	32	0.806940776937513	1.42855229953589	1.30015301134861	1.16245786702568	1.18779455280795	0.814490518726443	1.16431666164774	1.13315339492664	1.14394059548677	1.0532645607551	0.99414019008208	0.884053196203573	0.814490518726443
9	33	0.800272473561941	1.69902547385194	1.28080214254368	1.15078510121161	1.19143277853494	0.822794428096354	1.16663847190677	1.11625489482804	1.13980374839047	1.06544878392058	1.0268261216154	0.885473664757885	0.822794428096354
9	34	0.786037829655153	1.13290226459019	1.29595211043997	1.15865679675064	1.18931284294157	0.832566736587263	1.1672116569456	1.12412485024884	1.14329113528303	1.06930374669754	1.02689469464148	0.896105265983687	0.832566736587263
9	35	0.765154654501226	1.06577871578475	1.35921134613553	1.16597907390511	1.19257120782429	0.82751533464113	1.16680152206405	1.12776593561813	1.13499561076168	1.0522094214717	1.01023544418023	0.889875051494542	0.82751533464113
9	36	0.743172052463669	1.1539715029547	1.33999711723219	1.16523795802219	1.18648683785328	0.84369073823849	1.17327705594582	1.12722622244699	1.14084099624738	1.01363498903434	1.00078739566136	0.905868322878982	0.84369073823849
9	37	0.721651446901572	1.02174854357295	1.34488645106095	1.16825161816355	1.19098313809538	0.873253408161295	1.19921843710003	1.12902425066163	1.13510632535549	0.98943756319193	0.981582205835742	0.902910995075754	0.873253408161295
9	38	0.705256588315203	1.18379447277272	1.36552182398389	1.16823667015817	1.18446400472523	0.862005271515813	1.20862114493303	1.13073669762118	1.1352940553242	1.0112866784933	0.994888126066612	0.900770089706536	0.862005271515813
9	39	0.697952015082673	1.19764744993151	1.37851134840231	1.16035703141794	1.18465447430749	0.912828922501389	1.20658954423492	1.13540611085654	1.13618188806747	1.07600160400715	0.996024002364403	0.882548413240933	0.912828922501389
9	40	0.678920416596118	0.827147108062047	1.3845200419243	1.16694643998093	1.18413039908802	0.902483010596377	1.19529912031417	1.14017481100652	1.13415528660612	1.00940204564415	0.974636898795108	0.895139908330536	0.902483010596377
9	41	0.676820366983138	0.777793737923969	1.37206915291209	1.15768175562072	1.18377586670762	0.879391659111767	1.11336944223817	1.14818590652546	1.1313708580114	1.03886655984571	0.937767457797694	0.904323313756434	0.879391659111767
9	42	0.663468799420391	0.672663065085248	1.38995968041897	1.182525399823	1.18073074740415	0.901038756826641	1.16036650404014	1.1404603095674	1.13261426903916	1.05154851539102	0.948967582218262	0.894056715455998	0.901038756826641
9	43	0.628857539551337	1.15543826012981	1.42626629140299	1.17803182970525	1.17719499834498	0.894807378034592	1.1475797826654	1.14979159564718	1.13060247652566	1.04530789619363	0.897539160807997	0.886446402343439	0.894807378034592
9	44	0.565916679275629	0.712235291348673	1.38699183516212	1.16021759894809	1.17191051803895	0.919102196498332	1.20029845049248	1.1429068996782	1.12737224260027	1.04700913283977	0.96161556854985	0.928972111409693	0.919102196498332
9	45	0.604854038370113	0.963593664671144	1.42617079546873	1.16564770848286	1.1751198238444	0.926451784379474	1.10487038626603	1.14029109283611	1.12931153692963	1.04900481904964	0.982702994371188	0.919616294905617	0.926451784379474
9	46	0.605135950525663	0.0870331108767017	1.49322725737263	1.17237383392234	1.17151629853829	0.94658218372441	1.17178798911097	1.14058975683282	1.12769934194564	1.03354886597736	0.995292258131744	0.916831690546825	0.94658218372441
9	47	0.605913894635663	0.869168574030388	1.45569851447721	1.16091862802624	1.17014120468265	0.967250862022245	1.18945110648854	1.14701008794408	1.11479831444165	1.02808094386211	0.978542514736869	0.896279151843241	0.967250862022245
9	48	0.580634476346758	1.34153808780181	1.39979947984551	1.15959639109813	1.16039276836702	0.982766608340722	1.15360746223154	1.14609742888806	1.12194659413149	1.03157570385375	0.980861144943165	0.891619873823147	0.982766608340722
10	1	0.277717234603993	0.656898813263136	0.739952267308238	0.824475946945673	0.823634922738528	0.505141738938195	0.762289690397839	0.898135373335426	0.933922788068452	0.869298818134974	0.863507981569717	0.676014029482895	0.505141738938195
10	2	0.419740710056404	0.635648559356447	0.734134989558857	0.835142724280731	0.779471075767995	0.473906588868509	0.759470673059282	0.881164553938715	0.895798402260937	0.91875614538367	0.893669325557895	0.694285681068915	0.473906588868509
10	3	0.628097613678881	0.619597172196529	0.733528621290493	0.820274564914828	0.760673205840869	0.54302642718793	0.756215197726538	0.80930697452359	0.83750707399334	0.881590524660915	0.855159131605602	0.715724821155585	0.54302642718793
10	4	0.634335180105181	0.594554824578275	0.728834635359018	0.809491718914651	0.751447845498283	0.567637873824857	0.750249212176986	0.768521979071703	0.825162904138508	0.84495051362116	0.831470291003524	0.711661682331592	0.567637873824857
10	5	0.660961317417622	0.590013511678922	0.705242180220241	0.803586269485488	0.75452702371222	0.577645926349161	0.75765687720675	0.769035177536171	0.818145868673657	0.828613771005521	0.821963083911734	0.701444603778325	0.577645926349161
10	6	0.692766538492625	0.593644392426945	0.699499283316662	0.801332623949001	0.747392068706999	0.55652699687089	0.758887731589036	0.755467977734135	0.813569895051102	0.819271522252146	0.816976875578202	0.697600786312472	0.55652699687089
10	7	0.69740417770552	0.606059677252742	0.682929346071704	0.804669926471457	0.74461595571815	0.557265941301637	0.753683588790985	0.754770228566511	0.807002241880039	0.814555073486374	0.807073748372955	0.694502222878638	0.557265941301637
10	8	0.667744096970031	0.575220612305453	0.683815367124975	0.800251765975981	0.75386305935008	0.558910351157049	0.7492134684429	0.743054263193501	0.801014162366797	0.815067975378423	0.802640209256633	0.68569518179562	0.558910351157049
10	9	0.667690594281395	0.6281937583912	0.681535131436779	0.801986103688913	0.743463077079719	0.55317537860439	0.747900641813872	0.75249286695699	0.803303820458518	0.810495790919807	0.791574605683208	0.675528554466917	0.55317537860439
10	10	0.605995881397525	0.711164922259825	0.693876079625718	0.800173207892183	0.752162605956214	0.555543981141132	0.756923603819938	0.745397343807366	0.792432142994763	0.813757722544929	0.788566919362464	0.665340537095287	0.555543981141132
10	11	0.602775211376613	0.643125769314233	0.697861695963299	0.799547026839967	0.747971646160542	0.547611628963665	0.74741289624564	0.740700954214956	0.79639561731182	0.812162531670075	0.778859466377125	0.672993972117462	0.547611628963665
10	12	0.713075676851177	0.57931275004142	0.709266698124212	0.796574560580768	0.747707529743708	0.54722907470519	0.75260540356294	0.735522809505907	0.791937269314505	0.813137829904677	0.781720922279283	0.666221758503623	0.54722907470519
10	13	0.740131991002736	0.561837118960474	0.690230773202917	0.79189948255224	0.759755014322197	0.535525310101662	0.764159004693273	0.742832341744978	0.795329317529167	0.81555098382118	0.781097358269019	0.662021979153913	0.535525310101662
10	14	0.768682121527502	0.583567213841688	0.674340367817654	0.779024420668041	0.754161588204376	0.550929620476752	0.759637915013579	0.734976603128713	0.792008213598887	0.805518367230966	0.761302818222297	0.650854509694693	0.550929620476752
10	15	0.7521226968905	0.565340731978485	0.696177642845515	0.784777632187452	0.749460202085445	0.550649350673612	0.754693767255201	0.738238852856916	0.796568717774848	0.793444781992427	0.768636049471559	0.664803866393453	0.550649350673612
10	16	0.752188343627222	0.543084014607216	0.70706570709488	0.781092270795289	0.751629528552358	0.534644971686006	0.754394912581475	0.739481707596206	0.795514160146699	0.787080818755692	0.768496433286074	0.67431597453469	0.534644971686006
10	17	0.721729294079722	0.563169511091855	0.711844135950928	0.776786129038099	0.752757594914323	0.528144864583659	0.74793976914878	0.734000994248573	0.788209643949859	0.805248706887892	0.778341725270697	0.657095715917539	0.528144864583659
10	18	0.75253343715926	0.54520678291486	0.694514565040799	0.783297928790422	0.750072935297499	0.53088005833965	0.745740015998748	0.741665800038567	0.786509175622662	0.80101664412205	0.769148119730796	0.657869648915393	0.53088005833965
10	19	0.740063066011285	0.543552037278864	0.705932241197744	0.768301196968393	0.756290581831215	0.539441445129952	0.749976770438309	0.749468700212738	0.787576817617689	0.800351362547814	0.775681901390939	0.657689726103817	0.539441445129952
10	20	0.742128883252401	0.523402851419481	0.702039696327846	0.763082877753357	0.749799163600953	0.530068591477574	0.755946716681027	0.746021460054742	0.793328493376096	0.801614329529789	0.76585584282261	0.651319975137919	0.530068591477574
10	21	0.743877948423444	0.544919821878962	0.687363822868721	0.767334836052903	0.764859034436531	0.510417011815214	0.75265343233716	0.754653676182072	0.783940775091844	0.796518372556264	0.764152054341798	0.650209057381622	0.510417011815214
10	22	0.745069239155317	0.581071874257449	0.70678253118135	0.77423976523485	0.770184296646826	0.501920901334169	0.754361942196578	0.760223795588073	0.797581165002587	0.799734940435291	0.765143677259625	0.641219870042951	0.501920901334169
10	23	0.732555746995211	0.564396355016397	0.698742830280931	0.755435887143413	0.758462399469855	0.503724067307443	0.751721362737962	0.762121709610001	0.784770322425594	0.799626677064338	0.766623313434732	0.641048785266916	0.503724067307443
10	24	0.750944797680879	0.557871353199235	0.694936928794974	0.75513787059327	0.762952829010535	0.515621011266693	0.754033432636554	0.770869674002145	0.790375317785664	0.796734706813826	0.764922937161281	0.634204116900388	0.515621011266693
10	25	0.751436093810615	0.55670235691353	0.699799948501403	0.761044831379241	0.761802587103467	0.517245795718782	0.757912741171808	0.772650007804127	0.799625676979833	0.800904972836208	0.767967598332695	0.629497485509068	0.517245795718782
10	26	0.752660028135019	0.569040591730096	0.710306845331841	0.762167830760133	0.765467375815122	0.526154814564646	0.758594886161341	0.775981326247712	0.806257880716133	0.797415181529845	0.755728187202248	0.638478915711616	0.526154814564646
10	27	0.754729697675253	0.553544385991887	0.709449839366489	0.773441755693168	0.759372008686154	0.514466414872917	0.762768086437626	0.781115242728977	0.783361594019274	0.798440057297345	0.760129873848632	0.634110963916983	0.514466414872917
10	28	0.74139756185621	0.631442144198002	0.702271056624642	0.790633256002639	0.752659900780277	0.522209479925268	0.759892190378009	0.788276412627389	0.768215842881467	0.792190163563239	0.752134315062688	0.626589640115219	0.522209479925268
10	29	0.741179375742491	0.717369792850713	0.711478661322814	0.806469050165931	0.758401229630499	0.528585712108136	0.761658884825985	0.76863334760379	0.791949794953119	0.802331665331839	0.751334631330081	0.623083226071691	0.528585712108136
10	30	0.724516192259496	0.687722078057334	0.702770782953122	0.828476124021373	0.755815162820828	0.537771018791377	0.762312922465757	0.774143626311569	0.800420144504419	0.802641198457465	0.7515596244727	0.620002161255227	0.537771018791377
10	31	0.73476723120262	0.608461971598659	0.717902756857433	0.847482275257859	0.749770092434224	0.542258182681581	0.773796105250083	0.767206004382206	0.801496492400742	0.802368695716606	0.743270156922028	0.62915008076377	0.542258182681581
10	32	0.74187681202271	0.639475233439489	0.717261193358993	0.866253443689726	0.747471078183027	0.554740941078715	0.768049983735888	0.771716093103683	0.802868028888683	0.803547079465206	0.742036740231824	0.617945994741073	0.554740941078715
10	33	0.738237394049825	0.557882018707034	0.710730827295046	0.854771792974837	0.755999893268822	0.540463044602486	0.763783832602562	0.763333941987307	0.804178553071788	0.801463266329576	0.732164775098397	0.621604678391613	0.540463044602486
10	34	0.728456949457235	0.578395074481579	0.709842282370293	0.864479484636256	0.752646565879706	0.536388603814677	0.763877799553143	0.775449447999981	0.802431441992711	0.80133112269704	0.737266415954845	0.616095369566636	0.536388603814677
10	35	0.723320754270146	0.568070954204875	0.725615472825384	0.853876855800948	0.745167123721106	0.551320208250447	0.76054739374786	0.776792194325445	0.807523729453511	0.80842453750513	0.735988965667059	0.616895546248329	0.551320208250447
10	36	0.728720239364121	0.532280497144284	0.721578322929196	0.859347382316753	0.749293701485215	0.5463439323235	0.76684470849582	0.780188525879476	0.800714613605144	0.812562314284452	0.735573309393895	0.601478262470777	0.5463439323235
10	37	0.723578652496342	0.499214382075964	0.714936804239495	0.852849734235086	0.740049491423011	0.550635438650246	0.76377808468243	0.76603017631609	0.805262157050325	0.808745578632974	0.740035137531788	0.612178153873516	0.550635438650246
10	38	0.729389251192051	0.506094176008599	0.729588811531848	0.861896911422925	0.735380559616656	0.567491642881349	0.771339299634025	0.773016340837622	0.821601707735803	0.80960892915485	0.727359557484642	0.617599511393375	0.567491642881349
10	39	0.732137028120106	0.441592872678993	0.733264353872843	0.864068458967505	0.733214908242534	0.589090054853358	0.769416856958191	0.776323630892002	0.807361228305481	0.808017597668526	0.722671602639786	0.605534721217222	0.589090054853358
10	40	0.732334967706893	0.559582909530787	0.740516274997137	0.863279479354217	0.73467069304284	0.579228654959162	0.771193533687059	0.779618414786925	0.805636449004181	0.80445647173235	0.726686108947811	0.611729243799229	0.579228654959162
10	41	0.715637993727978	0.588642404720303	0.753202225604769	0.863074300894384	0.723415824499281	0.589869563697624	0.774110822122964	0.776089214478733	0.799364948701363	0.810637044265807	0.737242102828085	0.609945966034838	0.589869563697624
10	42	0.71644453073	0	0.737531751201719	0.868059056989177	0.729672213800633	0.600283204440426	0.768808514411115	0.779962245503382	0.81459829204713	0.813583495926046	0.738270866222335	0.621331235526709	0.600283204440426
10	43	0.717127003302698	0	0.72319942241875	0.864586631647926	0.722479903019533	0.622761488158754	0.771937830214269	0.779426295588144	0.811135667267025	0.80958362361924	0.732024642745127	0.605733764156345	0.622761488158754
10	44	0.7098710171691	0	0.770408825999011	0.859552409054235	0.722069497938615	0.639273116515346	0.779446482007532	0.771104667112785	0.80760729362804	0.808143485580687	0.723267634818336	0.612402742175581	0.639273116515346
10	45	0.701530553375569	0.0258682550465085	0.74862503753991	0.851740484812516	0.713672478342754	0.639190320975897	0.777085477998448	0.770875695038743	0.810498147005505	0.817126456224054	0.731472071784998	0.599978727138753	0.639190320975897
10	46	0.702046919183735	0	0.721747635306211	0.846057942654733	0.710510207737889	0.653939098851157	0.780650478650163	0.769806089907618	0.805201158080836	0.812806058020884	0.721352313087019	0.599925523143909	0.653939098851157
10	47	0.707563986574257	0	0.734837828218897	0.848370564663987	0.717668652960897	0.667959451925386	0.780641330565778	0.766305477526737	0.813201786942286	0.81159377109586	0.730293234600354	0.600422599588275	0.667959451925386
10	48	0.696957109051662	0	0.727260172087901	0.832823199773245	0.719271540707435	0.660935561568489	0.773994146502532	0.780702532544239	0.805463963977717	0.818673224442799	0.718387135261024	0.598973939012121	0.660935561568489
11	1	0.000651284656053284	2.55877988896683	1.33892786582848	1.37975800181768	1.45961146801455	1.10429341567471	0.000651284656053284	1.13951276952787	1.11221061107352	1.10435519461264	0.944765442363269	0.849176371539535	0.835803336441023
11	2	0	1.97789478244	1.31547860883309	1.3718253228655	1.42254397480628	1.13825570284879	0	1.14056803923877	1.08604011575553	1.09956588134887	0.946925876162347	1.63046194023701	0.787259391440244
11	3	0.165013422561444	1.7877156905599	1.30640193213565	1.36993098515745	1.41638355415059	1.16940889822091	0.165013422561444	1.12423405674151	1.08632186273226	1.10141327696366	0.9596900772673	0.833075282895624	0.751704395696878
11	4	0.0833080632208205	1.96455879312627	1.29715481295488	1.33717248506171	1.4329393558114	1.18181496854841	0.0833080632208205	1.11413510065219	1.09089672929964	1.09880220331172	0.955341791215936	1.04333487572435	1.38410948548284
11	5	0	2.3939116660353	1.28721624581695	1.33629938311749	1.39166778642142	1.18868970343256	0	1.12842402314477	1.08135337070151	1.10705735123806	0.934312277620731	1.25081596701027	0.722221375669492
11	6	0.616562558124673	1.94375456249349	1.29378894776117	1.31753979789638	1.37877144075032	1.21288542320306	0.616562558124673	1.13582227778498	1.07669328194124	1.09176108956319	0.939303466633199	2.08197762933611	1.34351044934037
11	7	0.392887725593329	2.62524333887785	1.27838724449548	1.32707807804771	1.29502616133193	1.22199523436353	0.392887725593329	1.12220422485746	1.0868710564927	1.09578907109199	0.932863099395004	2.31526425763658	0.772966771506677
11	8	0	3.13049343538277	1.27986266203602	1.32110001196273	1.27498364455773	1.23509466231026	0	1.12268312051785	1.09586609770595	1.10219972069688	0.936208862114069	0.887253271428478	1.22060065779023
11	9	0.0510495272303285	1.81535213846411	1.23257384914336	1.30242136797512	1.24487348078849	1.25732214294699	0.0510495272303285	1.11623251465007	1.08720084889956	1.09749649061539	0.939615592761795	1.42458794860697	1.17575731513204
11	10	0	2.16825158510137	1.21909778942714	1.3048804591668	1.21234279652773	1.27354316143579	0	1.12637110529074	1.08533288982265	1.09108886351588	0.932218834794229	0.993551694205191	1.489678035496
11	11	0.372870513143191	2.81756499223302	1.22563088114699	1.26287888377193	1.08740727056669	1.27540721405181	0.372870513143191	1.12036008721344	1.07902171925552	1.09125447383642	0.940243019273264	0.794531690844143	0.761231369942928
11	12	0.642100740090338	2.5915981562634	1.2253285000416	1.2421997323328	1.11766400049056	1.29090015733371	0.642100740090338	1.11729714300372	1.08548988799596	1.08284262303146	0.923917182317577	1.10644026844093	1.15440467235002
11	13	0.650832185004711	2.4692759514547	1.22916843404495	1.23997160084718	1.17356985647244	1.2949746488762	0.650832185004711	1.12369464417255	1.08356723571423	1.08446685902061	0.927790183538635	0.656093313741901	0.735267536421179
11	14	1.05197377014799	2.70501258157287	1.23979802514136	1.24254119976543	1.10735706398966	1.31258839066192	1.05197377014799	1.11779648254164	1.08537044998653	1.08001918282011	0.937765702897629	1.73437432309528	1.22738553993672
11	15	0.987953356923954	2.84940775111864	1.24625685586427	1.23154334014439	1.1853011277845	1.31754185017123	0.987953356923954	1.11186712440204	1.08798810851203	1.07863537812574	0.935758268738075	0.705566208424438	1.37216659339478
11	16	1.07744062946941	2.75762666856025	1.24250432090926	1.24471709850292	1.07387360949806	1.32304939550945	1.07744062946941	1.11851420935104	1.09454779701343	1.08538869233386	0.927142577017572	1.13658792960914	1.79068451290692
11	17	0.902168687260369	2.61113463342249	1.24541133506235	1.26245722591253	1.08257330006954	1.332436214388	0.902168687260369	1.12393903037624	1.09362905522731	1.07829357539423	0.926124672323728	0.679863467667572	0.763096352392299
11	18	0.830363829579249	2.81054012572881	1.23953801078551	1.24720385547808	1.12614289391543	1.33089273044516	0.830363829579249	1.12349494610179	1.09895773437201	1.07625729589589	0.915849588780276	1.01999764835979	1.38426530857342
11	19	0.942879595761106	3.28366566034271	1.23710634427751	1.26661447051908	1.14312316517774	1.33909587131727	0.942879595761106	1.12028071357841	1.0974479973456	1.08508242558393	0.898580011170836	0.735229786458927	1.59020111419835
11	20	1.34153480492515	3.12755639981515	1.24910209382217	1.27975121518845	1.18486722599117	1.33972280415492	1.34153480492515	1.12043589030978	1.10142987654029	1.0855427099228	0.898596707755638	1.36383486968417	0.779269662693761
11	21	1.78195526801721	4.03816334268337	1.23695429087545	1.27573999847751	1.20680146134055	1.33480429094197	1.78195526801721	1.12407985527865	1.09495332064955	1.08436789516379	0.874779154924014	1.12524834247897	0.770734903556329
11	22	2.09289963058482	4.52679977704599	1.25492040244513	1.27647054344072	1.0769749855097	1.33340332097017	2.09289963058482	1.11384594394381	1.09297222080127	1.08238674278413	1.62177379289541	1.31737226935001	1.24358591959936
11	23	2.19576566980558	3.83144268398259	1.26797672134357	1.28380913721241	1.1747184437076	1.3287544700657	2.19576566980558	1.11611754722046	1.08631580307642	1.22646384317283	0.846164284598066	0.778431496163879	0.804728654208947
11	24	2.35891320639101	4.50917437053852	1.2802358733978	1.27355897581554	1.13172322080085	1.32995480759241	2.35891320639101	1.11699635181051	1.0868361057533	1.12291887263938	1.61237001817378	1.07112466720902	0.775698521370979
11	25	3.09016703898287	4.6018998539106	1.27298748412479	1.28160625007488	1.12206120626965	1.32826213679236	3.09016703898287	1.12084041652548	1.08864621981578	1.06942787639381	2.17396109979244	1.44151132953172	0.741903106436882
11	26	2.692114728216	4.30799267047361	1.25105341171172	1.28056643826357	1.0999678547746	1.32228091809746	2.692114728216	1.11093507595287	1.08736705925798	1.05514300586676	2.66766848491897	1.11085148641031	0.761533361076777
11	27	2.41298051628811	4.08889457472105	1.25183223714703	1.29271523911615	1.2003397010295	1.31765659819298	2.41298051628811	1.12152062251751	1.09402075031903	1.06234293778554	3.20335652661337	1.32594702160244	0.748383499873967
11	28	2.31197158698043	3.92972185276273	1.23996020208514	1.29950413359389	1.28018841496972	1.32113218913148	2.31197158698043	1.1054093585657	1.09422993561267	1.0565232964756	3.39091864718606	0.95304808741731	0.751904220721636
11	29	2.94667957063077	3.92082353596729	1.26709317674727	1.29960551837297	1.16754660528849	1.30471793364359	2.94667957063077	1.10201645221414	1.09526725704899	1.05083129963382	3.0499728680081	1.60483778540818	0.740815091758762
11	30	2.82336428599257	3.95057524591591	1.25388648490101	1.30488631779334	1.2254609050562	1.32631400861951	2.82336428599257	1.11444294900331	1.09159101778187	1.05719020677743	3.51130112709977	1.54143230875347	0.76580657342781
11	31	2.11255623849684	4.89533420932691	1.28290778820643	1.32092801530044	1.19906994391737	1.33969278584243	2.11255623849684	1.11064219427244	1.0946896034002	1.05781756919212	4.57432680381617	1.1027335483402	0.807931355873428
11	32	2.77246020966171	4.48536558747216	1.29103286664972	1.31759775300536	1.17190563497299	1.35421898221399	2.77246020966171	1.10915535484576	1.09518831895399	1.04901337301169	4.2341479346002	1.18678055099462	0.811664323254444
11	33	2.39845544813447	4.44561698987509	1.27901393930022	1.31536479299167	1.12920851746777	1.36704410166628	2.39845544813447	1.10425171552337	1.08774507989774	1.06150943653153	3.71339605156584	1.3811172252612	0.821026264525177
11	34	2.5145342139263	4.06658031161632	1.27198731088776	1.32680860895597	1.17131063834277	1.37144731080969	2.5145342139263	1.1097366756268	1.09106742592467	1.0491075759144	4.26583026465538	2.13318100401599	1.14574239199514
11	35	2.43318146341322	4.32595817422515	1.29227496286427	1.33778891149064	1.18619404318165	1.41242173640884	2.43318146341322	1.11391771489564	1.09705431077733	1.05728619242701	4.69174855484856	1.58485187237592	0.825886345640102
11	36	2.31116884439353	4.48063206859537	1.29167829887472	1.33858067261786	1.19633833994761	1.40951443365644	2.31116884439353	1.10969472975945	1.09559851615149	1.05564290136681	4.65844655885458	1.86677734383325	1.38926185226664
11	37	1.90761186856177	4.08958402875393	1.27687792989845	1.31524960815057	1.2041336280076	1.38902133523721	1.90761186856177	1.11770050174311	1.09001228944107	1.03728239748387	4.5832157688973	2.29742836024586	1.20558660723169
11	38	2.23326365946364	4.41035773913309	1.33897427568804	1.34717096821042	1.20458243784663	1.41184059827375	2.23326365946364	1.11017442314614	1.08704870916952	1.03391342323024	3.60527993708195	1.99691836770885	1.39686590962182
11	39	2.28168415425131	4.28139555577866	1.31440274768296	1.35406470914324	1.21571326970007	1.40902095242372	2.28168415425131	1.1121267771297	1.09018235566197	1.03313249653887	4.33342744394951	1.75190876539675	1.15700133048373
11	40	2.48755463780338	4.63149365014095	1.3357537695353	1.3481501886807	1.23508976201022	1.42899475723567	2.48755463780338	1.10875811203096	1.08853815010727	1.03357288558671	3.27035214830114	1.74636032317076	1.15093553392254
11	41	2.51057299306751	4.34540586264342	1.34374882656574	1.35296107745629	1.24186245035769	1.43227709281827	2.51057299306751	1.09498992153432	1.09288129413487	1.02365554806065	3.48654093151859	2.04710340384405	0.858635549997761
11	42	2.44728866333675	3.96402231066834	1.33003184816865	1.35690022665937	1.23899265304107	1.43442729867253	2.44728866333675	1.09230220673151	1.08762046374427	1.00461104755582	3.47520819661202	2.51675686489421	1.21351563063901
11	43	2.16337426476436	3.77991103163869	1.3278752712899	1.35188332804093	1.25249723468253	1.43453172991131	2.16337426476436	1.10432755129207	1.09020571817035	1.00534184592267	2.99209451175896	2.54930566375452	0.875737751772721
11	44	2.36717404372491	3.98402576863603	1.31887899978388	1.35859562724868	1.25510469645772	1.41758635249971	2.36717404372491	1.11375232454738	1.10162061679431	1.00135632454564	3.2956207410592	2.21049829630726	0.867368828839256
11	45	2.14180319383737	4.00657318624289	1.32062557517478	1.34476970061054	1.24844701560852	1.42563928562521	2.14180319383737	1.10031708500321	1.09511516684917	0.995239646770574	2.94604901193342	2.56626242633128	1.17473862213157
11	46	2.16503603715802	3.49037685504504	1.32319374300599	1.34323735329579	1.25326476622584	1.47957118997645	2.16503603715802	1.09992989271089	1.10580737822314	0.985882652846836	2.24954345022446	2.3237169767744	0.843279461957617
11	47	2.63033576673654	2.89867897832145	1.33019302307716	1.33964519279319	1.25275969738951	1.45983327443789	2.63033576673654	1.09968453302859	1.09809520251959	0.989186732677481	1.9742265022903	2.45990062877035	1.10047583032214
11	48	2.8769683198786	2.11080389800522	1.33085134997457	1.34736918135213	1.25736542698636	1.4015375104614	2.8769683198786	1.08841374370467	1.09807431056682	0.985541039995731	3.33864023697859	2.0659328668537	0.870922402678328
12	1	1.15933116201803	1.3907781255018	1.36083191318406	1.25252181986265	1.25813334736712	1.29225798939809	1.15933116201803	1.2260587373291	1.27692166718227	1.19652181281195	1.13551081971966	1.39464709563034	1.40177625395015
12	2	1.15856169609559	1.40011751572706	1.36901032870815	1.27892040197273	1.26294237500625	1.30334552914595	1.15856169609559	1.23492882265722	1.28865391930376	1.18500037136342	1.13102734606307	1.37363264737395	1.32701660949909
12	3	1.17568454092138	1.39297180505642	1.36762176973604	1.27748579948428	1.24614015761804	1.31148695253506	1.17568454092138	1.233213856877	1.30121087559214	1.17996681986179	1.14316308484823	1.3261276459405	1.33058713409784
12	4	1.16748596656077	1.37620749700882	1.36965924053519	1.3108549641904	1.25357525862618	1.30980731506905	1.16748596656077	1.21807691532023	1.29905565315182	1.18230324519908	1.14412003970535	1.33990418131697	1.67023403871723
12	5	1.18063522390401	1.37872563640137	1.36382755369915	1.32871637136345	1.26450178551367	1.30654456036868	1.18063522390401	1.20805357838296	1.29759171726611	1.18488915015352	1.14643829120523	1.3013342758495	1.79867443311874
12	6	1.18647802091797	1.37035957851198	1.35913495766188	1.32607534469583	1.25894894654362	1.31367167047967	1.18647802091797	1.23150968482176	1.31313034580363	1.16538347528598	1.15600688232498	1.29366051369322	1.41542137912258
12	7	1.17915906479426	1.38833898787243	1.36917447963365	1.3367549688253	1.24614583449756	1.30449367112325	1.17915906479426	1.209444502607	1.29593344239969	1.15364326557806	1.15723677828163	1.27910038587667	1.42632047761294
12	8	1.16424370462876	1.38545337454167	1.35718070487674	1.32842554072183	1.24684321407801	1.3113511672606	1.16424370462876	1.22463516994048	1.29324982672815	1.15671607394959	1.15552547662856	1.2478073938625	1.7069417224019
12	9	1.16920520070959	1.37887562923077	1.34922860559098	1.33059999207668	1.24306717399307	1.30544512899384	1.16920520070959	1.19646772524753	1.30212961946692	1.15446579175444	1.1375213086425	1.24117829211102	2.02368490008377
12	10	1.13811509154666	1.36063595850931	1.35626245256766	1.32771138346454	1.24353925955599	1.3066958719749	1.13811509154666	1.22396954283979	1.30219407004823	1.15012279864486	1.14535418258755	1.27881659780214	1.45945637239339
12	11	1.18968408449256	1.35926680739313	1.350903326671	1.3294701095777	1.23460640981604	1.28826235458414	1.18968408449256	1.23565112408252	1.30987594012771	1.15061721566249	1.14256342138045	1.26998085293519	1.71598395523855
12	12	1.18654879555698	1.36667059242942	1.36362565470014	1.33774109020673	1.23760127780698	1.28737617554632	1.18654879555698	1.23668642945842	1.29716554107661	1.13965964900972	1.13276176758142	1.26871723019925	1.74874566786131
12	13	1.17944141137308	1.37568987372885	1.35935148759336	1.33243205730375	1.22733684422242	1.28174153360841	1.17944141137308	1.21753686810943	1.29296559479919	1.1591918119286	1.12563262103445	1.23461770295857	1.95521525325895
12	14	1.16649297683531	1.36981711517299	1.36050852439774	1.32149418250802	1.22805415656832	1.27186251588581	1.16649297683531	1.20238288588609	1.28746525022233	1.1613816037615	1.11508500543787	1.16066149997885	1.9533374848001
12	15	1.16185036015556	1.35196071720031	1.36581149128416	1.32348739038678	1.22010240548495	1.2722668448657	1.16185036015556	1.1999303318139	1.28232135809861	1.16644325418186	1.12294739972678	1.16292500242979	1.66994109593435
12	16	1.16342176618883	1.35333854489464	1.36463328243834	1.32345031466185	1.22517674183852	1.28038041863744	1.16342176618883	1.21056594246316	1.27981347423695	1.16151603198476	1.12097317461512	1.16161217063836	2.44959010195
12	17	1.16978346360198	1.34086964235728	1.34898808770312	1.32387114077823	1.22484255490487	1.26976516102413	1.16978346360198	1.18939390684468	1.26860160236468	1.15227640571529	1.13287862139553	1.13748822956146	2.61542388557302
12	18	1.1719106560037	1.34002079848598	1.35366042869868	1.32981329214797	1.22984635208104	1.27295161938986	1.1719106560037	1.21156926146086	1.26787285474837	1.15238455759377	1.13763962021486	1.15231077417267	2.37392579123841
12	19	1.14873809933951	1.35343753122811	1.34600652311771	1.32707591267114	1.23174121723937	1.26628436908435	1.14873809933951	1.23187851769098	1.25731625340782	1.15840834769149	1.1465645528325	1.15186016234987	2.21377825669474
12	20	1.1893641500717	1.35703366123241	1.35217107064236	1.32063944365072	1.24124914275345	1.26696695170091	1.1893641500717	1.23422967764054	1.2587424188804	1.1451506598316	1.14019941181668	1.14295261463866	1.64484342562156
12	21	1.19682243880899	1.35710263312796	1.33485680401686	1.31858337311498	1.22531909629922	1.25912780310769	1.19682243880899	1.23956372598461	1.25255927915336	1.14871058569997	1.15936571286643	1.14664034843303	1.26913582395837
12	22	1.18919807968804	1.33250364669907	1.32672744718484	1.30645697387065	1.22190827729473	1.26544767287727	1.18919807968804	1.23685113356342	1.26447283045988	1.15213826232353	1.16669090916556	1.12841422781407	1.21267529497947
12	23	1.2071545340363	1.32144425648406	1.33718966189615	1.31456523537929	1.21502971249655	1.25619127869252	1.2071545340363	1.25349780155341	1.25851393208082	1.14634441845512	1.17756624085071	1.13036176886352	1.64756786882852
12	24	1.18631289629287	1.32918537800438	1.3430965238521	1.31897942798512	1.21500141634844	1.27359604492796	1.18631289629287	1.24995127632014	1.25932532289402	1.14649266278489	1.19910834794054	1.13664339855067	1.76967233787256
12	25	1.19557271497664	1.32754244142124	1.33913529732984	1.32810215658966	1.21356604570271	1.26835527180337	1.19557271497664	1.25986085454469	1.25339952157636	1.14917726494306	1.20138059974838	1.08885601350331	1.22532654498138
12	26	1.19271233181477	1.33093025873776	1.34883227091204	1.30784079530064	1.2100967140073	1.26318416844673	1.19271233181477	1.28197413075787	1.2723832586743	1.15529169161008	1.19200375207225	1.08149443221172	1.47642898010471
12	27	1.20707955641405	1.32581453406706	1.33837244100407	1.31049975407875	1.21422226611204	1.26007816155113	1.20707955641405	1.28277437508339	1.26796685821506	1.14395682498679	1.20395404147875	1.04114247693585	1.51301870030062
12	28	1.14400049617782	1.33276848875142	1.34783126676855	1.32091475191928	1.22008775360173	1.25586613001781	1.14400049617782	1.29718732924531	1.25283427091141	1.15215578005031	1.20369555687696	1.05606254093016	1.4942200726285
12	29	1.19777267810724	1.33806376726964	1.33997728082973	1.31162346680425	1.22635043349936	1.25789597624613	1.19777267810724	1.30294168480592	1.25998632692264	1.15942505053006	1.19357565011398	1.01468666714694	1.77630538881752
12	30	1.21462069269979	1.33254691736922	1.33844155285131	1.32005604582057	1.20784000188692	1.26676322673969	1.21462069269979	1.32016828720329	1.2554766957399	1.16636084230713	1.20098897824975	0.924867681417798	1.78965898161743
12	31	1.21246290216208	1.35342019043974	1.33916502587391	1.31825182742343	1.20495355263818	1.25573587443303	1.21246290216208	1.31830447558358	1.25713305250162	1.16025486410321	1.21062339851949	0.981616024230836	1.73267528615029
12	32	1.21969951213166	1.34838441286068	1.33488623680501	1.32300172227658	1.2022347841255	1.23950961720536	1.21969951213166	1.32130977896814	1.25540870486084	1.1670333391283	1.22103267367081	0.882769498861527	1.79074731734472
12	33	1.19080158965235	1.33345329669218	1.31100330646266	1.32226313977676	1.19608990407896	1.26405420573145	1.19080158965235	1.33708349608028	1.26529556347141	1.17686236606713	1.21281666078624	0.886771857960893	1.70460719605514
12	34	1.21478694011439	1.33845974935741	1.3366645125029	1.32507207179788	1.20845728131256	1.24227730119512	1.21478694011439	1.3394664297376	1.26017234967514	1.18726283638532	1.21976811296756	0.814924832353315	1.87661535350593
12	35	1.21733916742601	1.3404541440997	1.33753984214534	1.31934680672608	1.223682407695	1.23189597274477	1.21733916742601	1.3445646279671	1.2521483358287	1.1899378556877	1.22811833314197	0.82401479644152	1.55554717212122
12	36	1.24651360510271	1.34146679431628	1.3630958120564	1.33044780735379	1.23101790259329	1.24388425591106	1.24651360510271	1.34250520320444	1.2620294603007	1.18580363525448	1.23335258756975	0.796739239249365	1.30571134696953
12	37	1.26493684351889	1.3391673374916	1.37692536275682	1.32602374129805	1.22322989186549	1.24590263547599	1.26493684351889	1.34334829171173	1.24884855584385	1.191918955074	1.23419416462414	0.650378265285041	1.29746989223076
12	38	1.23824001559801	1.33003825995493	1.37104333901461	1.32217142618674	1.2182684976788	1.24135812783208	1.23824001559801	1.33969311725031	1.24630141307257	1.1779758512078	1.2426782304968	0.734488895871139	1.25418735542758
12	39	1.16360673763557	1.32895282701545	1.38691363900907	1.31447303777421	1.21956117537026	1.24776427237572	1.16360673763557	1.33572343939146	1.24211365924835	1.1831344459193	1.25306494078403	0.630245251728348	1.29593339284442
12	40	1.12004007817292	1.33369018539985	1.37990534935899	1.32753087773616	1.21337572680673	1.24128044250037	1.12004007817292	1.34021005844367	1.24014728428154	1.20653887881444	1.2493780254827	0.709168580602149	1.2508952127213
12	41	1.13022160100708	1.33210159968307	1.38493876538889	1.32541305149118	1.21566374382769	1.23767938639084	1.13022160100708	1.33765653750083	1.23990434687555	1.21308492034155	1.24743573372689	0.562587336198075	1.26841688580785
12	42	1.14757025685409	1.31806304179359	1.38111742896938	1.33639235712285	1.22688484353717	1.23483051731164	1.14757025685409	1.2924796493185	1.24766458602225	1.21363059184074	1.25126530778981	0.612911539177417	1.25715223343221
12	43	1.16275706172581	1.31802852996099	1.3879344635771	1.3390564109378	1.21687768295348	1.23833158818315	1.16275706172581	1.28003713980335	1.2419303615733	1.20320138434679	1.27125987985967	0.573368722810802	1.2431332647435
12	44	1.1635444841952	1.31205758966524	1.38073137065142	1.34720610714522	1.21441578732072	1.25180477268762	1.1635444841952	1.28907921647396	1.24428510237469	1.20978272795174	1.25315047374887	0.571945632586233	1.26318441194349
12	45	1.12912404353512	1.30204610840932	1.37989979442681	1.34162269191485	1.22285762013572	1.27247242009199	1.12912404353512	1.31338498891428	1.2344884404761	1.21169443956034	1.24896502875879	0.50505684723831	1.25244019021797
12	46	1.14998292660115	1.28726930992186	1.38792578145081	1.35258160218655	1.20461207810246	1.25963613650086	1.14998292660115	1.32076663290069	1.23084549923083	1.21050054080888	1.2643875914103	0.489253866692697	1.26189809842347
12	47	1.17095961735084	1.27951961652114	1.40463530567819	1.33941520576694	1.19578393237658	1.26000304560632	1.17095961735084	1.3234941266761	1.23302923759126	1.2148723607902	1.27328052960875	0.641243509259996	1.24661479916951
12	48	1.17492714053887	1.26616340630741	1.39128545415986	1.35224915616422	1.13520232723215	1.25039844656588	1.17492714053887	1.3294406584661	1.22553974528169	1.21989004535911	1.27058824447415	0.710787414319374	1.25386744519232
13	1	1.18497779165711	1.15676514669965	1.31883522277055	1.32871433613325	1.35464565224949	1.28859257043259	1.18497779165711	1.20191108436808	1.12642583284053	1.11316555375224	1.11468638684158	1.05003956459646	1.03200188020909
13	2	1.17989182145294	1.18254565190818	1.31814425646776	1.32096224484026	1.34825189645314	1.29143138971806	1.17989182145294	1.20412966696095	1.12502480042458	1.09752652391038	1.11080330220662	1.05668417922269	1.04240410310074
13	3	1.29354706981388	1.162386787073	1.31329942647061	1.32104704899425	1.34906006807247	1.2932136974199	1.29354706981388	1.19300337791632	1.12336112682214	1.09921362357922	1.11751470300092	1.04412215159646	1.0289823132185
13	4	1.31355412435791	1.17573609903912	1.30876526178204	1.31526411526034	1.34005358319146	1.29800955900274	1.31355412435791	1.20374364563579	1.12720958176127	1.09669807223864	1.12496267310062	1.05436905299993	1.03783813372015
13	5	1.30652900283966	1.18124760918763	1.31030266553252	1.31445634977982	1.33793204223759	1.30405072734707	1.30652900283966	1.21234335227985	1.13190029976969	1.09698081985332	1.11686634386557	1.04527555217433	1.02647080295941
13	6	1.25150848703461	1.15609800040784	1.31278834101681	1.30841902168036	1.3398267330536	1.29699791334211	1.25150848703461	1.20973789499628	1.13726035366829	1.09137021200349	1.12686836336653	1.05683501003992	1.01943250453849
13	7	1.16507252085715	1.19860548752673	1.31469230758387	1.30500822089916	1.3428092491755	1.30443865937334	1.16507252085715	1.2103235067515	1.13707320147563	1.08062412000341	1.11702111977636	1.06615436029056	1.01715440416065
13	8	1.18352834264294	1.21296959289745	1.31515883379289	1.30873814908785	1.34259776624577	1.30518215369514	1.18352834264294	1.2030204831421	1.134105464221	1.07769797427533	1.11588063500181	1.05803419170515	1.01050706461403
13	9	1.17093776758928	1.22420543634242	1.32810306049524	1.31808394862145	1.34814018562208	1.31331825239217	1.17093776758928	1.20884247584876	1.13165650123169	1.08449747121225	1.11927742550938	1.06246095103109	0.993161243291182
13	10	1.16129801530268	1.18061778041006	1.31698056181967	1.32044116357686	1.35259937250037	1.31186585983691	1.16129801530268	1.2151013198029	1.13992029759652	1.07046887641184	1.11026954424591	1.05849804574487	0.993290632877133
13	11	1.16479326150426	1.18875113228546	1.32001856505182	1.3323255561434	1.34920429114604	1.3124849077175	1.16479326150426	1.20177504930333	1.13103075113435	1.07220079025773	1.10738391935056	1.05872194487774	0.980031286622447
13	12	1.14433040702402	1.20318429667274	1.32312443313441	1.31426421145974	1.34835668027014	1.32229930711864	1.14433040702402	1.21273272956173	1.12124410668608	1.06822667024869	1.10499857264136	1.06082799739711	0.973697953202214
13	13	1.13392137862521	1.18937128343178	1.3199366799946	1.32048482577423	1.34989296911783	1.31653749675169	1.13392137862521	1.20861225836058	1.12121232707251	1.06124427688225	1.10306665332377	1.06124888683564	0.979404798662479
13	14	1.13921964763611	1.20041693628312	1.32732392179766	1.32409618050093	1.34526003778701	1.32413355138426	1.13921964763611	1.21254677532006	1.13332034113742	1.06608860052891	1.10333663171794	1.07075216518783	0.987691269797174
13	15	1.25732953309464	1.1908856328772	1.32608129562616	1.32415681731036	1.34028215864129	1.31272872993923	1.25732953309464	1.21164337676074	1.12980555028735	1.08852589368719	1.0964829282692	1.067151367874	0.998536067948205
13	16	1.30667985029061	1.19181981077109	1.32606058958497	1.32223290333775	1.34168852710755	1.3137144525643	1.30667985029061	1.19981937964162	1.13040133228618	1.10378958843609	1.11688404889666	1.07385133663628	1.00569068840571
13	17	1.27568416071793	1.2089628992401	1.33349993046975	1.32704668634655	1.34464848019852	1.31884592770578	1.27568416071793	1.19503559582124	1.13477255395815	1.09265319983397	1.11207974498595	1.07665647317908	1.0231316641451
13	18	1.27882176152837	1.19121160128244	1.32757392600234	1.33055370087371	1.33617694955539	1.3180476353848	1.27882176152837	1.20164612941673	1.12077166368508	1.08648807906692	1.11437990348636	1.04762084553834	1.01533203534789
13	19	1.27790967697499	1.17329935796231	1.33162285875973	1.31289879449215	1.33940387381004	1.32465581758934	1.27790967697499	1.20285671901595	1.11091270129999	1.08413709720507	1.11984238791081	0.70848236620863	1.05074231610939
13	20	1.25927503434303	1.14872543629771	1.33779664229328	1.32320525626741	1.34173371179749	1.33246733651475	1.25927503434303	1.20234201017231	1.1025959870313	1.07844136807798	1.1045052312815	1.0401223572966	1.0456981298638
13	21	1.25436973000232	1.15182748272492	1.3336563740026	1.31732787253707	1.34995490248747	1.32932557882254	1.25436973000232	1.19957354710123	1.11566594410855	1.07059686297078	1.10166509123073	1.06427712786925	1.05358488044245
13	22	1.26068102810269	1.11069893307232	1.33668945342811	1.32674414206857	1.34875144519026	1.32225810057554	1.26068102810269	1.20193620522213	1.1220200095631	1.07339560644591	1.11118930141833	1.07931139473466	1.05132678299972
13	23	1.25248017409103	0.877803483311522	1.33090718586634	1.32538840674435	1.35079483593688	1.32910113874675	1.25248017409103	1.20390790054101	1.09552818920434	1.08950879935408	1.10506610278229	1.07976319162678	1.06276452108789
13	24	1.24219741781459	0.793259258718318	1.33054205861735	1.31237388425825	1.34499986502787	1.31778546848851	1.24219741781459	1.19784797651802	1.07875359146005	1.08562157715215	1.10602002300425	1.07421738545661	1.06595486095787
13	25	1.23489822303914	0.97411550707212	1.35322499933871	1.31187859737558	1.34063087084388	1.32195332927606	1.23489822303914	1.20432361562128	1.07661480078121	1.09339126249999	1.11405161446134	0.872402633816358	1.07403554095856
13	26	1.22139655581333	1.38442758103515	1.3521196451789	1.31312911668509	1.34092831039177	1.32429541035184	1.22139655581333	1.19255373350086	1.09751191494602	1.09543830086094	1.10940177830794	0.645116066388389	1.08433697985227
13	27	1.21363182894929	1.34610212753741	1.35109994175957	1.30716806180292	1.34229696580372	1.32278029501216	1.21363182894929	1.18721243742871	1.10826176895785	1.10268826400373	1.10207352558938	1.10197416356057	1.08524071812493
13	28	1.20258854613738	1.08526375708661	1.30097608141637	1.31358545077219	1.34854541268758	1.31821751273999	1.20258854613738	1.18507886309202	1.08012558960648	1.09338185687708	1.10041831730157	0.944354027150424	1.09875786698714
13	29	1.1817050092397	1.56675499814004	0	1.29845625961739	1.3455991466655	1.310351396707	1.1817050092397	1.18613842011318	1.08674203127888	1.09037337546845	1.09629402874304	1.06369696911677	1.09988823369865
13	30	1.16756302009448	1.18087100454328	0	1.30635079224095	1.34633471214308	1.31690699621602	1.16756302009448	1.1757638063354	1.0858911292612	1.09874471482231	1.09300774969358	1.07145355241359	1.10240315066973
13	31	1.16384508993	1.04384658530535	0	1.30406137287691	1.35136077684894	1.3101305604056	1.16384508993	1.17986101271715	1.08129071664845	1.09893092115995	1.09642497666385	1.08802731766191	1.10319592246043
13	32	1.15377385112298	1.17241606233707	0.502410283179585	1.3038252867125	1.34298242050725	1.31171029892447	1.15377385112298	1.18421621189756	1.09030915648997	1.0846961316273	1.10445753505178	1.06209358880598	1.10777888846858
13	33	1.15691537724819	1.03466194845693	0.157443934832557	1.30919567297093	1.35220924902217	1.31239236542997	1.15691537724819	1.16941795749654	1.09354260913185	1.09900271060158	1.09777272205906	1.05845525280768	1.10675666126522
13	34	1.14896183622263	0.150725887667001	0.436982472139599	1.27134472057755	1.33970216897917	1.30644629550618	1.14896183622263	1.17415189417706	1.10094577857129	1.10195611039768	1.1046678278966	1.06030299471725	1.11617166124116
13	35	1.14695188648753	0.964521460978173	0.469189455287796	0	1.34562188785058	1.30984909170606	1.14695188648753	1.16964098045673	1.09079611229302	1.09135579596953	1.10961569098212	1.02004722594884	1.12265292321026
13	36	1.13906631547864	0.713206106084438	0.736017186552598	0	1.34421156378331	1.30703879086374	1.13906631547864	1.15953702255691	1.09772533752617	1.08318921985022	1.08241959024435	1.02831557381257	1.12606018351507
13	37	1.1402358387327	0.30188616750432	0.753286570499521	0.125273657962587	1.34120911936909	1.31304151610491	1.1402358387327	1.15504815843169	1.09754759207902	1.09852417782893	1.11777690673753	1.02014004137359	1.12875255745959
13	38	1.14739088260897	0.692231362469751	1.02323875895893	0.409642984383553	1.35051671688638	1.30736958931763	1.14739088260897	1.15688687798143	1.106928196324	1.09217311540441	1.1150386061677	1.05918835709446	1.13693600840125
13	39	1.14495328029913	1.05991509396124	0.883621639350567	0.635451236721805	1.3411768676903	1.30236867302098	1.14495328029913	1.1467979745053	1.10439726491186	1.08695154336623	1.12087373345839	1.05396509698056	1.13824431444975
13	40	1.14815941193192	0.625323133415769	0.901755747667898	1.03909773770771	1.35443934255664	1.30691981720492	1.14815941193192	1.15431791717312	1.10629245486068	1.10048616540608	1.11551838507345	1.03786076964393	1.14080755384519
13	41	1.14577394126981	0.189086907714167	1.01489079150209	1.19336891652551	1.35388884440327	1.308542973198	1.14577394126981	1.14840580167103	1.109533367314	1.09675113979861	1.06659699155522	1.06184993902469	1.15379563833942
13	42	1.14565554709953	0	0.988646973451252	1.22680845693404	1.35193385354831	1.30193751525302	1.14565554709953	1.14233765741564	1.11569986329581	1.10303276478056	1.0097442930931	1.04810022809337	1.14891650554195
13	43	1.14648313743123	0.71486205144162	1.01814686830262	1.25089850796466	1.34690195777253	1.29865803128238	1.14648313743123	1.14326918553058	1.11127065088038	1.0979008513128	1.12942650277301	1.02111262430324	1.14785266522972
13	44	1.14136394119043	0	1.07202594650183	1.2387432791615	1.34134631458091	1.30045771217446	1.14136394119043	1.14996097851364	1.10050181692666	1.10449994904831	1.13353468238962	1.01408530793345	1.148032557148
13	45	1.14726668540571	0.165351394083499	1.12285088648126	1.23948748555624	1.34421726390192	1.29503852753538	1.14726668540571	1.13734785704416	1.10908903068594	1.11038239323178	1.12714039509236	1.02835827358905	1.14965008137056
13	46	1.15728505527203	0.38676929339791	1.05842308510116	1.24335996317655	1.33974889545027	1.30010567920737	1.15728505527203	1.13851541030326	1.11291444179508	1.10906247110904	1.11705712106162	1.06048446658651	1.15733227253919
13	47	1.14957861141258	0.137225814214941	0.759181188474774	1.25902897190726	1.34218939613653	1.30408464217087	1.14957861141258	1.14224605845258	1.10496391794246	1.11244703752779	1.09820823294143	0.994202645230701	1.15293355601406
13	48	1.14654672991492	0.346586813064934	0.934974721536701	1.25673530151334	1.34113109166562	1.30765881266472	1.14654672991492	1.13653041079824	1.10475340553651	1.11575455764171	1.11178195462809	0.999357817352083	1.14693786799818
14	1	0.118753139536127	1.80856940804068	1.55704256545082	1.47987101985023	1.32970427612364	1.23347229297343	1.31900071140219	1.30338693104527	1.34314351061208	1.33667458732248	1.2533919787728	1.29268640462166	1.23347229297343
14	2	0	1.80396067716527	1.57163944876244	1.4664777697068	1.34742838558397	1.22624026100711	1.32506329490945	1.31988436052617	1.35761130307427	1.31841132493066	1.24560483906592	1.28284538765608	1.22624026100711
14	3	0	1.76618340185866	1.56792166039668	1.47278050703633	1.37486156422327	1.22021109207211	1.32272529651073	1.34656669799526	1.32911804899534	1.29390186641935	1.22162585258441	1.2846699497489	1.22021109207211
14	4	0.0455663487046853	1.74507316969551	1.60280375513532	1.49938365710776	1.38947115109854	1.22398727717426	1.33134285902943	1.35427477918534	1.33070699026068	1.29511504076532	1.24153967786991	1.2911174749562	1.22398727717426
14	5	0	1.7126047073804	1.61055457111872	1.49400814775387	1.41620668871185	1.22248469815573	1.32816648884207	1.37442787050436	1.33160215197752	1.3088693452163	1.24537716836183	1.27257076777492	1.22248469815573
14	6	0.0946245114149995	1.70220782372359	1.57340084656969	1.49018634658934	1.4086776466118	1.2201298228852	1.3207900124892	1.35745554097251	1.32847319961776	1.31156611833878	1.26708368604132	1.28380074554558	1.2201298228852
14	7	0.245377304387503	1.69014117630883	1.56169568187392	1.49001827272632	1.40110466718626	1.22443290843336	1.3191668306105	1.38523149508106	1.32818320375799	1.31612499620882	1.26676185117424	1.31879030826831	1.22443290843336
14	8	0	1.7139825783797	1.56477493283289	1.48765304107203	1.39882456292007	1.21869544454202	1.32760221924787	1.3763840528899	1.33092470169526	1.31589721300727	1.25883079681219	1.30500740628545	1.21869544454202
14	9	0.22737604945165	1.72058488725057	1.55244199654771	1.47435686150386	1.40975929617152	1.22340499569593	1.33711196477829	1.36851178185719	1.32543453776739	1.28896785431286	1.24067898175	1.25591732517139	1.22340499569593
14	10	0.129352384352501	1.70922081886908	1.56731649566934	1.47119707110695	1.40965772661129	1.21787156543565	1.32604631057748	1.38818643331282	1.33296307035201	1.30195956794442	1.24401487044688	1.26380754928816	1.21787156543565
14	11	0.276057538800462	1.71924457181421	1.5416112084751	1.46191423551817	1.42130968592196	1.22237130636741	1.32457568413378	1.38514500853877	1.33937443237783	1.30719220358577	1.27062412767152	1.26576942829786	1.22237130636741
14	12	0.108894621585745	1.68538082422188	1.55723363766393	1.46234113462202	1.42670437609945	1.23192253012952	1.31548416458977	1.36925980800056	1.33604314709223	1.2913880572752	1.2440959304414	1.26161581388911	1.23192253012952
14	13	0.0846553679968845	1.67638400126652	1.58468040500893	1.46755722980156	1.42253988820009	1.23447991016132	1.3172137526532	1.38342058528187	1.32975868049888	1.30379910774004	1.21921625555358	1.28484689830911	1.23447991016132
14	14	0.29193895421967	1.68747581221137	1.58332409348585	1.45975028938559	1.44347830687677	1.24000106394043	1.31461437167622	1.37869043462817	1.33046222443216	1.30525406019714	1.23827726580029	1.28426207487222	1.24000106394043
14	15	0.344366847114886	1.64676334022307	1.58099031011465	1.42790823901463	1.4403324090768	1.22892302776111	1.30625643287243	1.34403731042176	1.32572590157517	1.31718444833299	1.28633840815876	1.28051153459205	1.22892302776111
14	16	0	1.68778961237231	1.55459994544564	1.40369991759284	1.38204568489343	1.22225658158016	1.29650806306022	1.32371437808707	1.30573478673828	1.30565447568613	1.27909162269941	1.26041701635438	1.22225658158016
14	17	0.434880164421461	1.65827363948849	1.56046635215674	1.39480671757102	1.37852150270144	1.23283174228682	1.30474353101707	1.32183904617089	1.30612993432784	1.32594619928586	1.22654781237302	1.26603053955336	1.23283174228682
14	18	0.0742267061750678	1.66430880960609	1.56924946678952	1.38482903054418	1.38006773505466	1.23075230472886	1.29957405795885	1.31067470876277	1.29761852210856	1.29814683979836	1.2190857661237	1.27405286759477	1.23075230472886
14	19	0	1.66315404260301	1.54746766053929	1.37240661932514	1.38199906033241	1.2474427787006	1.29839237179472	1.31769273851417	1.30118164344512	1.28189447160588	1.21779346597187	1.24787808326912	1.2474427787006
14	20	0.647810906458814	1.69043399990711	1.55017137750956	1.36959592568274	1.37010109072229	1.23183318116808	1.3081594200062	1.33398489363494	1.30693903552563	1.29195262171288	1.23073125025023	1.24274074119798	1.23183318116808
14	21	0.643816589673798	1.64451302210461	1.54726354023891	1.37670397150889	1.38898547174322	1.22648015719495	1.30942311400341	1.34063970992747	1.31773913540473	1.30102948258194	1.23088768203902	1.24346238324263	1.22648015719495
14	22	0.592358179552604	1.67539123587454	1.54762083081742	1.38615012226986	1.38447394032507	1.22581971893529	1.30180551642318	1.35539906057755	1.31510709002341	1.30003181006696	1.2272938268602	1.26905736120701	1.22581971893529
14	23	0.325007432011704	1.67099600313313	1.55679463496842	1.40252019099853	1.38244868653661	1.2240149594579	1.3120578937501	1.34596997196899	1.31461509568549	1.30737794565126	1.2334238390312	1.25647522733605	1.2240149594579
14	24	0.627754562548544	1.650236714313	1.55542599730677	1.40453964841271	1.3803302844239	1.22487440325389	1.30448763375007	1.34353502393068	1.31288221789029	1.30225349985898	1.251662785361	1.25439482145166	1.22487440325389
14	25	0.637833593807037	1.63899750341382	1.5509690406182	1.41960507817005	1.38909604977932	1.23515485534199	1.29016598883235	1.32513732158236	1.32780620667238	1.30155980398145	1.24861183763709	1.25932804549437	1.23515485534199
14	26	1.09345028641176	1.65804128036865	1.57280440205124	1.4218116511347	1.39204330811869	1.22680563204567	1.27170239915914	1.34118051501071	1.32390860250414	1.30235014715906	1.24057767925349	1.28196001577259	1.22680563204567
14	27	0.799837385524297	1.64938627246797	1.57306493557291	1.42386615956084	1.38676341772685	1.23082845268753	1.28723784117029	1.34108539426543	1.31833083932094	1.30843938130955	1.24285382455856	1.26749286755145	1.23082845268753
14	28	0.612786698768366	1.64836687755305	1.5570874605311	1.43693242718501	1.40114045297261	1.24002659264279	1.29924163618169	1.33498487849371	1.31634266991059	1.3008171955081	1.23229916062241	1.272416984496	1.24002659264279
14	29	0.769467129379486	1.6417793080323	1.55881148775206	1.44458472196307	1.39408814172457	1.24755337318816	1.28680296140119	1.33177037904078	1.32172994766353	1.28497251405605	1.24828410847462	1.26793738970448	1.24755337318816
14	30	0.661441879325024	1.63542388500367	1.55368216784567	1.44284344075115	1.39409342883385	1.24260340860872	1.30295504506977	1.32957367815945	1.32671902358169	1.29534880082709	1.23949896074539	1.23034054051667	1.24260340860872
14	31	0.942347869441845	1.63724173915563	1.59027736496822	1.45625156123141	1.36623432772309	1.24829111321769	1.28517711261224	1.31522666771602	1.32427025229111	1.29520305643624	1.23378138909731	1.2352137696394	1.24829111321769
14	32	0.960682384931118	1.62244319833646	1.57602327298054	1.48614363954938	1.35219783871862	1.2567706272098	1.29403026258985	1.32909304218779	1.31564662353101	1.30289255127503	1.24568879580273	1.28693264862902	1.2567706272098
14	33	1.1059168195435	1.62206267959946	1.62283072113352	1.48394593798258	1.34035746374391	1.25502120799726	1.29318566598553	1.32426106521667	1.31037906562587	1.29829229105875	1.26590275398354	1.28648461016332	1.25502120799726
14	34	1.13315456216783	1.64297802473909	1.6205942341876	1.48639958305813	1.37469760945279	1.24372739740841	1.2922359123172	1.32105011003211	1.31628520221758	1.29378980738486	1.26018850653645	1.26455263812589	1.24372739740841
14	35	1.27300277991427	1.63612106868309	1.57807630591945	1.48476234338539	1.36961609974186	1.24780036299686	1.28587307470428	1.3122064321941	1.30882308528457	1.28821097841446	1.2247234872653	1.23624211788588	1.24780036299686
14	36	1.27126999145157	1.58788398781162	1.59424107376959	1.49439016349089	1.3646403480552	1.24473028447993	1.27230044974076	1.30738386192697	1.32111514206329	1.30083024890875	1.23125402904732	1.25478955238793	1.24473028447993
14	37	1.41439333260854	1.57714056403395	1.61041166044385	1.48622682278736	1.37025184868191	1.25937273276785	1.28094116281471	1.31346292690823	1.31315514571933	1.29858645375042	1.24798745807975	1.26586218234067	1.25937273276785
14	38	1.32639623734967	1.55410224236731	1.61979285391024	1.50019437679868	1.38289803447223	1.23803045695295	1.29333148241582	1.31717845218488	1.32461066708841	1.28977865675945	1.24292171141779	1.26068803418199	1.23803045695295
14	39	1.17342061503689	1.54190482737171	1.60686760944892	1.50102409901045	1.37217502675617	1.23751565659702	1.28534622616279	1.3074166955986	1.31565084952262	1.26807478659327	1.23953073707228	1.25920878368044	1.23751565659702
14	40	1.46219201337115	1.52537304692536	1.60974009610158	1.49692189694905	1.39482725253118	1.24560275524293	1.27535618599435	1.30437440676094	1.32574570393043	1.25909721887465	1.26463764760055	1.27204659283916	1.24560275524293
14	41	1.40371899950876	1.53296137398663	1.77234151015125	1.51016402746144	1.39129330382635	1.242630131587	1.27407555099099	1.29498927908634	1.31633874546183	1.28007181900124	1.24202579547503	1.26744960051343	1.242630131587
14	42	1.55585834500497	1.5579476585454	1.82248507602042	1.51897384216451	1.3962080329915	1.26006682766317	1.28346775160166	1.30191140028063	1.31540410964601	1.27488395272624	1.2481986040986	1.25757278026764	1.26006682766317
14	43	1.58287201540938	1.54060182082895	1.80132798824036	1.52272544884649	1.37747292133251	1.25458543797046	1.27930507294811	1.2916774312183	1.31059633230864	1.27761748699967	1.29181538255872	1.25301296843108	1.25458543797046
14	44	1.60839632883004	1.50179430655541	1.8060388947952	1.50457154178114	1.39607870943478	1.24953266774251	1.27750985299277	1.30373480393912	1.29661633362407	1.26755273870078	1.2605471136379	1.24375905068922	1.24953266774251
14	45	1.68756195143717	1.50233697060751	1.75878254896999	1.51150921067139	1.38861287696296	1.24920229748407	1.26956509288988	1.2931455172297	1.29430451233735	1.27379068688531	1.23499720543083	1.26533642556972	1.24920229748407
14	46	1.73578625100654	1.46175511837557	1.814889926113	1.52159176972252	1.37275167107073	1.25433669398105	1.28073403509098	1.28582837512137	1.30705279942119	1.2707886990771	1.23405253926482	1.24373211128364	1.25433669398105
14	47	1.55081146263845	1.44702176351363	1.79723115371249	1.48771751207725	1.39228675968168	1.25181475213133	1.2912226674298	1.28901793678621	1.31121304140849	1.27613828738134	1.25294644086944	1.25065407224064	1.25181475213133
14	48	1.75652694987725	1.44647995305148	1.83223235822405	1.50460206207533	1.39499720462739	1.25186396536436	1.29700345521957	1.27842602301207	1.30235069133949	1.2983284953852	1.21741667482703	1.26141101350102	1.25186396536436
15	1	1.45278350655259	1.62214521072847	1.4048724334601	1.35108807905712	1.38839253382871	1.35202590690541	1.45278350655259	1.39527698044901	1.4315589918623	1.40103927671313	1.31431590565088	1.21705082121747	1.12275451496122
15	2	1.45557464425728	1.61751659469128	1.3616921669688	1.31662417245646	1.4295465175443	1.3592059963393	1.45557464425728	1.40527944540967	1.39318452043586	1.37123539644319	1.31192302755187	1.20512699603625	1.12466182817564
15	3	1.4384864862778	1.57328037806628	1.40222581989725	1.32390356809022	1.40504081030478	1.35212586453555	1.4384864862778	1.38369342021904	1.3991124114882	1.36541598413659	1.31994310115536	1.19943875323104	1.10683746979804
15	4	1.39057239073089	1.53757153344791	1.33264501519998	1.31938722278641	1.36683674017078	1.34893113378984	1.39057239073089	1.37033935831028	1.38384138448879	1.38689723913521	1.2962196798948	1.20053643043	1.13034253235812
15	5	1.42374239453828	1.54239582466367	1.35083637973356	1.29708828897391	1.36070142393492	1.34859329518217	1.42374239453828	1.39878074373037	1.37776416758833	1.37856696929288	1.2961488804556	1.20411138574584	1.12590850490703
15	6	1.41472118046575	1.58510387902384	1.35437657032227	1.29907651954559	1.36558161946513	1.3479677058562	1.41472118046575	1.38464996319424	1.38160067033219	1.37550426372783	1.29828861732137	1.19789949850728	1.12905796823819
15	7	1.43947581440091	1.54834781503264	1.32587653341129	1.31516985519263	1.32999187560489	1.34871245176755	1.43947581440091	1.36250986870255	1.37538529755568	1.38150064414997	1.30021935347875	1.1904097632843	1.12893435843111
15	8	1.35573028480386	1.56574029207835	1.37613879514131	1.31018243673377	1.33610342558673	1.34644020715403	1.35573028480386	1.40186174861121	1.36963175074207	1.37725964179261	1.34154696402326	1.22548677601738	1.14555226019962
15	9	1.37651357145062	1.59327038529349	1.32942791969642	1.32825480360895	1.33928189182759	1.34819813350997	1.37651357145062	1.40121841845251	1.3802119773256	1.37057381603809	1.2854446196517	1.19274334312773	1.11794824215863
15	10	1.40929851262567	1.57165572221165	1.37196138561156	1.31888249367713	1.26779224105291	1.35090088433689	1.40929851262567	1.38268960507882	1.38862530961969	1.38363190054203	1.28019431461015	1.18139907996456	1.0710509356015
15	11	1.39936137985162	1.56015225125902	1.37155226749782	1.30159183639535	1.28753248814446	1.35020512942801	1.39936137985162	1.38608178174289	1.37625388149729	1.37237060469773	1.28813995526859	1.19209412547287	1.06166431056634
15	12	1.37935213404156	1.55115941948478	1.33692885322363	1.30842479415997	1.32028120907248	1.35375748990675	1.37935213404156	1.38597398844332	1.37768758331524	1.37564627160484	1.30941133650858	1.20183848532984	1.02483747406053
15	13	1.38784707839225	1.5557759676002	1.35054952522273	1.30773414301144	1.34037408575631	1.3536761598761	1.38784707839225	1.36424569365404	1.36751591981454	1.34585045698007	1.31192271077262	1.19581857531253	1.01175595824395
15	14	1.39047835660832	1.51368397290727	1.3598014764766	1.30948392263355	1.34171035083437	1.34733623920121	1.39047835660832	1.39757909821761	1.37572367776777	1.37126847854031	1.30473397771677	1.19298819209145	1.03907960130643
15	15	1.42627671692696	1.51864807803489	1.34619023365281	1.31629695311251	1.34614500332117	1.35721966820883	1.42627671692696	1.38149919160443	1.3881848525663	1.36022862322635	1.29389708708413	1.19148783909314	1.08051242337266
15	16	1.4503075525077	1.59155717363589	1.35200276243094	1.31152275798012	1.35704142238523	1.352740905634	1.4503075525077	1.36813076666728	1.37606940778583	1.35583843289648	1.30225599964322	1.17304572882621	1.06054922022995
15	17	1.46366243791677	1.56300554700634	1.35495237581634	1.30265612240523	1.35418551052565	1.37015155155417	1.46366243791677	1.39062660055338	1.37773419561589	1.36258439019321	1.32607693625763	1.18468142152802	1.10519929246087
15	18	1.47506844522417	1.5193385628494	1.3586755574577	1.30676620998698	1.363282921202	1.36943808505512	1.47506844522417	1.38355061777583	1.38686509346743	1.3590743908916	1.32272261139896	1.17622893925157	1.14774655540817
15	19	1.46358197441903	1.54122321863928	1.3572373138091	1.31914480831096	1.36446676175879	1.37799079741976	1.46358197441903	1.38175401700978	1.37426921637971	1.3634507437125	1.34545950616248	1.18057916327547	1.16027333728526
15	20	1.48677860926647	1.50908026222203	1.37194778027456	1.30589625659893	1.35202772562126	1.38293021554989	1.48677860926647	1.36884174182202	1.36906944634821	1.34741437274627	1.31989836327461	1.17378787448326	1.20740284054467
15	21	1.51277071717256	1.55389214861756	1.39200349132196	1.30257253941375	1.36182109427953	1.37555509586051	1.51277071717256	1.38715072487615	1.36879192993619	1.37132030496624	1.33272931627936	1.18358388457298	1.21586308026728
15	22	1.4874791502118	1.57042635388537	1.36683023960236	1.30493553216917	1.35854094792731	1.36513206305904	1.4874791502118	1.38526627514026	1.37799059652934	1.35770961384064	1.32791868555352	1.19017821504058	1.22739690882268
15	23	1.46383094476169	1.613122269977	1.37999148510396	1.30441753388299	1.35126619648438	1.36717353908192	1.46383094476169	1.3761791846749	1.3830827212162	1.34525379942055	1.29668690705478	1.17998493629051	1.25792071958156
15	24	1.44876869080772	1.5651459042624	1.39024859305882	1.30497539058891	1.36013861315652	1.3708894280016	1.44876869080772	1.37053098967875	1.36686066453062	1.35545201266342	1.29535408537015	1.17288461119769	1.26241306026072
15	25	1.46479315961844	1.54573514951811	1.37730566049661	1.3301558676503	1.35560721655902	1.3651951583848	1.46479315961844	1.38466874955857	1.36682615024088	1.34812293026795	1.30446755592801	1.15972227759605	1.28653478616561
15	26	1.43495544228956	1.56311303699528	1.40792484621203	1.34115724751987	1.3530744181558	1.37266497022912	1.43495544228956	1.38411880245534	1.3636426780836	1.3345762193313	1.29873307438111	1.15525014793255	1.27480387577779
15	27	1.44450355204779	1.60839664452769	1.45669364813307	1.37834931564466	1.34662545232103	1.36536804453283	1.44450355204779	1.36219620889173	1.36537889996764	1.36393724418085	1.29643244017955	1.15630261594249	1.29129667942737
15	28	1.46955440525628	1.60190076325125	1.44881501116706	1.36819407576978	1.35581847113331	1.36091352492885	1.46955440525628	1.37455937207725	1.36017708974016	1.36161279378858	1.32054067286276	1.18004267170484	1.2991267672703
15	29	1.44830632884369	1.607568452086	1.44009457902131	1.39226353748066	1.3504485731912	1.36554381725614	1.44830632884369	1.36319853346799	1.36332799160573	1.3492242067296	1.32852408821949	1.15764641391872	1.29231358252074
15	30	1.44653498195259	1.62227358084938	1.4020422073959	1.38852964773473	1.35570815653595	1.3632900540133	1.44653498195259	1.34327208429126	1.35303032776432	1.35188936622413	1.30102234027115	1.16988375232367	1.29025384006904
15	31	1.43296047522785	1.59702537558353	1.42813003404621	1.41841473489365	1.34447418711196	1.35935297766505	1.43296047522785	1.38648119673421	1.35511190957582	1.36171398152168	1.30446091019535	1.17080286425341	1.30851248826662
15	32	1.43927927279942	1.63321116326027	1.42249132079845	1.41381646433869	1.34757866707575	1.36304879568383	1.43927927279942	1.38186938156681	1.35070846753303	1.30600633501094	1.28781375688949	1.17400924133022	1.3119460156972
15	33	1.42656996291729	1.65915208832139	1.49139238989563	1.42812297844199	1.34714354516535	1.36389557148298	1.42656996291729	1.36931338832734	1.36942696201236	1.33731077251985	1.30029729748629	1.16015226352801	1.31472323109775
15	34	1.43436851664291	1.66917629401804	1.41538949899393	1.42911809985041	1.34292759074519	1.3624324731288	1.43436851664291	1.37530718727792	1.36003439292643	1.34726461771968	1.30315325827078	1.16289236843192	1.34394104860539
15	35	1.42680411080737	1.67819557881922	1.45170534082992	1.40771041261204	1.33491486563125	1.37154698277521	1.42680411080737	1.35196815038193	1.34752497427621	1.28734973835708	1.27695110858202	1.16940893912941	1.3347568527995
15	36	1.43326535029741	1.71344897045238	1.42865942779936	1.43207813956335	1.33889806293897	1.36762526746459	1.43326535029741	1.38845051709435	1.35475823893303	1.326529447489	1.29931623906794	1.15302569753438	1.31371279270808
15	37	1.41780025948141	1.68378363310138	1.42328504335013	1.42752990026224	1.33900193370704	1.36445662064788	1.41780025948141	1.38425299999469	1.36117036382736	1.31712054146805	1.29469868034619	1.14649388576739	1.33007249477844
15	38	1.43496091790723	1.69922237976457	1.43495075147439	1.43086357395712	1.3366582405521	1.3571439432456	1.43496091790723	1.36828251406433	1.34984650137525	1.28707621528241	1.27659380978142	1.16102837953945	1.34142624693349
15	39	1.43618562282318	1.70677410400097	1.42127836178106	1.43674512579346	1.33676062923906	1.3595887194806	1.43618562282318	1.36565230645048	1.3567178256088	1.32664747056625	1.27938869370718	1.1549410919216	1.33763672101052
15	40	1.41877725366362	1.69211661339681	1.42076307052824	1.44192423425195	1.33471623218928	1.35592886367785	1.41877725366362	1.36012066897759	1.36120795265249	1.28073779185106	1.27088290494911	1.15571430215609	1.33121314373299
15	41	1.42044284564762	1.68726810000131	1.43765930340199	1.44161000236992	1.33187372204081	1.35034618009501	1.42044284564762	1.37533915857375	1.35609141021822	1.29872098078778	1.26667498761629	1.16680907991938	1.32500732368169
15	42	1.42571295059431	1.71230068751542	1.44549950646344	1.43978290821539	1.33996521882776	1.36112184618934	1.42571295059431	1.36994612863202	1.36451885309118	1.29925193734435	1.2754167576852	1.15753041951564	1.34380835855457
15	43	1.44617018592429	1.69305650836035	1.45127656225584	1.45904976621706	1.33229863991583	1.36045467077624	1.44617018592429	1.36670533662637	1.36325731819378	1.28742060528546	1.26238972619197	1.15358479953613	1.33453305639637
15	44	1.44884678543218	1.65934618577796	1.48157348040103	1.45072282470349	1.33312414897784	1.36952244401898	1.44884678543218	1.36324336106565	1.36268547456454	1.33027526589455	1.26890343382544	1.14469236636442	1.31438095038998
15	45	1.45607365075864	1.70525324591938	1.50986757097401	1.46196713410722	1.32549718589681	1.36812819641514	1.45607365075864	1.34856111205503	1.38443899893697	1.25710667462229	1.24743689657435	1.14879304892063	1.32504269348812
15	46	1.44759989911648	1.68637977682672	1.48826190609516	1.44025492578501	1.33529704139237	1.36719586001059	1.44759989911648	1.36914455762551	1.34873329953291	1.27005123310164	1.25857075259998	1.18230468414715	1.30808963333922
15	47	1.45201813179536	1.67010223545128	1.49616524201363	1.43458346634857	1.33233164296161	1.36672291440564	1.45201813179536	1.38154634862088	1.35995937340667	1.29714759134689	1.24594382685447	1.16208665718528	1.30151917801807
15	48	1.4768072439273	1.67972847008434	1.53614675271715	1.44401764754783	1.33027093265485	1.36148728520513	1.4768072439273	1.37556819007041	1.36973861509745	1.24240734369209	1.24186223886289	1.22159323151812	1.33008529180948
