# Supplementary material for: Two central pattern generators from the crab, Cancer borealis, respond robustly and differentially to extreme extracellular pH
Source: eLife journal article supplement (doi:10.7554/elife.41877), 2018-12-28
Supplement: supp [file elife-41877-supp-v1.zip › elife_poa_e41877_Figure_3_source_data_3.csv]

prep	bin	pH78_1	pH55	pH61	pH67	pH72	pH78_2	pH78_3	pH83	pH88	pH93	pH98	pH104	pH78_4
1	1	1	0	3.16666666666667	3.78947368421053	3.88235294117647	1	2.875	2.86666666666667	2.21428571428571	1.53846153846154	1	1	1
1	2	1	0	3.38888888888889	3.83333333333333	3.88235294117647	1.3	2.93333333333333	2.78571428571429	2.42857142857143	1.33333333333333	1.15384615384615	1	1.3
1	3	1	0	3	3.88235294117647	3.625	1	2.86666666666667	2.8	2.42857142857143	1.25	1.25	1	1
1	4	1	0	3.16666666666667	3.72222222222222	3.58823529411765	1	3	2.64285714285714	2.64285714285714	1.33333333333333	1.08333333333333	1	1
1	5	1	0	3.05882352941176	3.72222222222222	3.64705882352941	1.11111111111111	3	2.66666666666667	2.42857142857143	1.08333333333333	1	1	1.11111111111111
1	6	1	0	3.05555555555556	3.72222222222222	3.64705882352941	1.125	3	2.85714285714286	2.5	1	1	1	1.125
1	7	1	0	3.16666666666667	3.66666666666667	3.58823529411765	1	2.85714285714286	2.73333333333333	2.4	1	1	1	1
1	8	1	0	3.11764705882353	3.73684210526316	3.52941176470588	1	2.66666666666667	2.8	2.42857142857143	1	1	1	1
1	9	1	0	3.22222222222222	3.72222222222222	3.82352941176471	1.11111111111111	2.33333333333333	2.57142857142857	2.21428571428571	1	1	1	1.11111111111111
1	10	1	0	3.05555555555556	3.61111111111111	3.58823529411765	1.125	2.46666666666667	2.5	2.4	1	1	1	1.125
1	11	1	0	3.05555555555556	3.66666666666667	3.70588235294118	1.11111111111111	2.66666666666667	2.53333333333333	2.35714285714286	1	1.07692307692308	1	1.11111111111111
1	12	1	0	3.22222222222222	3.63157894736842	3.70588235294118	1.11111111111111	2.625	2.5	2.35714285714286	1	1.08333333333333	1	1.11111111111111
1	13	1	0	3.11111111111111	3.66666666666667	3.61111111111111	1	2.66666666666667	2.46666666666667	2.26666666666667	1	1.16666666666667	1	1
1	14	1	0	3	3.55555555555556	3.58823529411765	1	2.73333333333333	2.5	2.28571428571429	1	1	1	1
1	15	1	0	3.05555555555556	3.63157894736842	3.52941176470588	1	2.6875	2.5	2.28571428571429	1	1	1	1
1	16	1	0	3.05882352941176	3.38888888888889	3.76470588235294	1	2.6	2.53333333333333	2.4	1.07692307692308	1	1	1
1	17	1	0	3.22222222222222	3.68421052631579	3.70588235294118	1	2.6875	2.64285714285714	2.64285714285714	1	1.07692307692308	1	1
1	18	1.21052631578947	0	3	3.77777777777778	3.64705882352941	1	2.73333333333333	2.57142857142857	2.85714285714286	1	1	1	1
1	19	1	0	3.05555555555556	3.61111111111111	3.61111111111111	1	2.8	2.57142857142857	3	1	1	1	1
1	20	1.2	0	3.16666666666667	3.63157894736842	3.82352941176471	1.14285714285714	2.75	2.46666666666667	3	1.07692307692308	1.08333333333333	1	1.14285714285714
1	21	1.14285714285714	0	3.05555555555556	3.44444444444444	3.70588235294118	1	2.8	2.57142857142857	3	1.07692307692308	1	1	1
1	22	1.04545454545455	0	3.22222222222222	3.57894736842105	3.64705882352941	1	2.93333333333333	2.78571428571429	2.92857142857143	1	1	1	1
1	23	1.2	0	3.11111111111111	3.61111111111111	3.88235294117647	1	2.86666666666667	2.5	3	1	1.16666666666667	1	1
1	24	1.23809523809524	0	3.05555555555556	3.61111111111111	3.66666666666667	1	2.8	2.46666666666667	2.92857142857143	1	1.16666666666667	1.08333333333333	1
1	25	1.14285714285714	0	3.17647058823529	3.68421052631579	3.82352941176471	1	2.73333333333333	2.42857142857143	3	1	1.07692307692308	1	1
1	26	1.13636363636364	0	3	3.72222222222222	3.88235294117647	1.16666666666667	2.75	2.42857142857143	2.92857142857143	1	1.08333333333333	1.09090909090909	1.16666666666667
1	27	1.125	0	3.11111111111111	3.73684210526316	3.94444444444444	1	2.66666666666667	2.5	2.73333333333333	1	1	1	1
1	28	1.29166666666667	0	3	3.55555555555556	4	1	2.73333333333333	2.42857142857143	2.85714285714286	1	1	1	1
1	29	1.2	0	3	3.57894736842105	4	1.22222222222222	2.8	2.42857142857143	2.85714285714286	1	1.16666666666667	1	1.22222222222222
1	30	1.39130434782609	0	3	3.78947368421053	4	1.22222222222222	2.8	2.42857142857143	2.78571428571429	1	1	1	1.22222222222222
1	31	1.21739130434783	0	3	3.88888888888889	4	1.55555555555556	2.8	2.71428571428571	2.42857142857143	1	1.08333333333333	1	1.55555555555556
1	32	1.45454545454545	0	3	4	4	1.7	2.86666666666667	2.64285714285714	2.46666666666667	1	1	1	1.7
1	33	1.34782608695652	0	3	4	4	2	2.86666666666667	2.57142857142857	2.57142857142857	1	1.07692307692308	1	2
1	34	1.34782608695652	0	3	4	4	2.18181818181818	3	2.42857142857143	2.71428571428571	1	1	1	2.18181818181818
1	35	1.57142857142857	0	3.0625	4	4	2.27272727272727	3	2.38461538461538	2.5	1	1.07692307692308	1	2.27272727272727
1	36	1.5	0	3.05882352941176	4	4	2.6	3	2.42857142857143	2.71428571428571	1	1	1	2.6
1	37	1.71428571428571	0	3	4	4	2.90909090909091	3	2.5	2.53846153846154	1	1	1	2.90909090909091
1	38	1.68181818181818	0	3	4	4	3	3	2.46153846153846	2.53846153846154	1	1.08333333333333	1	3
1	39	1.43478260869565	0	2.94117647058824	4	3.94444444444444	3	3	2.5	2.35714285714286	1	1.23076923076923	1	3
1	40	1.68181818181818	0	3	4	4	3	3	2.5	2.15384615384615	1	1.08333333333333	1.09090909090909	3
1	41	1.76190476190476	0	2.9375	4	3.94117647058824	3	3	2.61538461538462	2.15384615384615	1	1.08333333333333	1.1	3
1	42	1.80952380952381	0	2.88235294117647	4	3.94444444444444	3.07692307692308	3	2.42857142857143	2.14285714285714	1	1	1	3.07692307692308
1	43	1.95	0	3	4	4	3.33333333333333	2.93333333333333	2.53846153846154	2.14285714285714	1	1.07692307692308	1	3.33333333333333
1	44	1.76190476190476	0	2.75	4	4	3.78571428571429	2.70588235294118	2.46153846153846	2.07692307692308	1	1	1	3.78571428571429
1	45	2.04761904761905	0	2.75	4	4	3.69230769230769	2.875	2.35714285714286	2	1	1	1	3.69230769230769
1	46	2.15789473684211	0	2.625	4	3.94444444444444	3.92857142857143	3	2.61538461538462	2.07692307692308	1	1	1	3.92857142857143
1	47	2.25	0	2.625	4	4	3.85714285714286	3	2.46153846153846	2	1	1	1	3.85714285714286
1	48	2.42105263157895	0	2.5625	4	4	3.85714285714286	3	2.5	2	1	1	1	3.85714285714286
2	1	0.75	0	5.31818181818182	4.79166666666667	5.375	4.83333333333333	0.75	3.125	2.6875	2.07142857142857	2.0625	4.5	3.78571428571429
2	2	1.16666666666667	0	5.63636363636364	5	5.36363636363636	4.66666666666667	1.16666666666667	3	3.0625	1.42857142857143	2.0625	5	3.83333333333333
2	3	1	0	6.15	4.72727272727273	5.70833333333333	4.54166666666667	1	3.07142857142857	2.71428571428571	1.33333333333333	2.3125	4.9375	3.28571428571429
2	4	1	0	6.81818181818182	5.40909090909091	5	4.38461538461539	1	2.85714285714286	2.8125	1.64285714285714	1.92857142857143	5.0625	3
2	5	1.125	0	6.36363636363636	5.18181818181818	5.36363636363636	5.25	1.125	2.5625	2.625	1.41666666666667	2	4.9375	3.07142857142857
2	6	1.375	0	5.13636363636364	5.04166666666667	5.58333333333333	4.33333333333333	1.375	3	2.8125	1.5	1.78571428571429	5.5	3.71428571428571
2	7	1.1	0	5.45	5	4.91666666666667	4.41666666666667	1.1	2.625	2.5625	1.5	1.71428571428571	5	3.08333333333333
2	8	1.16666666666667	0	5.45454545454545	5.5	4.70833333333333	4.29166666666667	1.16666666666667	2.85714285714286	2.64285714285714	1.07142857142857	1.9375	4.6875	2.57142857142857
2	9	1.2	0	5.9	5.18181818181818	5.04166666666667	4.58333333333333	1.2	2.9375	2.6875	1.33333333333333	1.78571428571429	4.625	2.57142857142857
2	10	1.5	0	5.59090909090909	4.75	4.91666666666667	4.59090909090909	1.5	2.875	2.8125	1.91666666666667	2.14285714285714	4.78571428571429	2.75
2	11	2	0	5.18181818181818	5.27272727272727	5.20833333333333	4.5	2	3.35714285714286	3.1875	1.57142857142857	1.92857142857143	4.9375	3.28571428571429
2	12	1.83333333333333	0	5.7	5.59090909090909	5.04166666666667	4.69230769230769	1.83333333333333	2.8125	3.0625	1.41666666666667	1.625	5.8125	2.8125
2	13	2.16666666666667	0	6.45454545454545	5.13636363636364	5.09090909090909	4.91666666666667	2.16666666666667	3.07142857142857	2.375	1.16666666666667	1.85714285714286	5.625	3.08333333333333
2	14	2.25	0	6	4.86363636363636	5	4.45833333333333	2.25	3.375	2.57142857142857	1.91666666666667	1.9375	5.5625	3.28571428571429
2	15	2.08333333333333	0	5.25	5.22727272727273	4.75	4.91666666666667	2.08333333333333	3.125	2.75	1.57142857142857	1.92857142857143	5.875	3.57142857142857
2	16	2.78571428571429	0	6.59090909090909	4.66666666666667	4.95833333333333	4.58333333333333	2.78571428571429	3.57142857142857	2.4375	1.41666666666667	2.21428571428571	5.44444444444444	4.35714285714286
2	17	1.85714285714286	0	6.72727272727273	5.68181818181818	4.75	4.75	1.85714285714286	3.0625	2.8125	1.25	1.9375	5.8125	4.0625
2	18	1.66666666666667	0	6.4	5.27272727272727	4.91666666666667	5.125	1.66666666666667	3	2.8125	1.35714285714286	1.71428571428571	5.125	4.07142857142857
2	19	2.3125	0	5.27272727272727	4.54545454545455	4.625	4.70833333333333	2.3125	2.9375	3.125	1.5	2.25	5.75	3.92857142857143
2	20	1.9375	0	5.63636363636364	5.63636363636364	4.95454545454545	4.375	1.9375	3.28571428571429	2.375	1.5	1.875	5.625	4.14285714285714
2	21	1.5	0	6.2	5.86363636363636	5.20833333333333	4.79166666666667	1.5	3.375	2.6875	1.25	2.07142857142857	5.66666666666667	4.1875
2	22	2.125	0	5.86363636363636	5.45454545454545	5.04166666666667	5	2.125	3.1875	2.71428571428571	1.41666666666667	1.875	5.6875	4.14285714285714
2	23	2.05555555555556	0	5.90909090909091	5.63636363636364	4.45833333333333	4.79166666666667	2.05555555555556	2.64285714285714	2.875	1.64285714285714	2.07142857142857	5.875	5.21428571428571
2	24	1.9	0	6	5.22727272727273	4.79166666666667	4.90909090909091	1.9	2.6875	3.125	1.41666666666667	2.125	5.625	6.78571428571429
2	25	1.55	0	5.77272727272727	5.83333333333333	4.625	4.79166666666667	1.55	2.8125	2.71428571428571	1.16666666666667	2.0625	5.625	6.0625
2	26	2.05555555555556	0	6.59090909090909	5.90909090909091	4.79166666666667	4.66666666666667	2.05555555555556	2.71428571428571	2.57142857142857	1.85714285714286	2	5.375	6.58333333333333
2	27	1.75	0	6.40909090909091	6.41666666666667	4.83333333333333	4.875	1.75	2.75	2.8125	1.57142857142857	2.3125	5.625	7.07142857142857
2	28	2.1	0	5.9	6.72727272727273	5.54166666666667	4.91666666666667	2.1	2.9375	2.64285714285714	1.5	2.5	5.5	6
2	29	2.27777777777778	0	5.45	6.66666666666667	5.70833333333333	5.68181818181818	2.27777777777778	2.92857142857143	2.16666666666667	1	2.5	5.5625	8
2	30	2.05	0	6.04545454545455	6.29166666666667	5.18181818181818	5.58333333333333	2.05	3	2	1.75	2.4375	5.22222222222222	7.71428571428571
2	31	2.05	0	6.04545454545455	7.63636363636364	5.375	5.29166666666667	2.05	3	2.07142857142857	1.5	3	5.8125	7.5
2	32	2.2	0	5.90909090909091	7.5	5.375	5	2.2	2.9375	1.71428571428571	1.07142857142857	2.5	5.9375	7.78571428571429
2	33	2.2	0	6	7	5.58333333333333	5.40909090909091	2.2	2.71428571428571	2	1.28571428571429	2.75	5.625	8.21428571428571
2	34	2	0	6.18181818181818	7.125	5.25	5.79166666666667	2	3.5625	1.5	1.66666666666667	2.5	5.5	8.85714285714286
2	35	2.1	0	5.55	7.79166666666667	4.95833333333333	5.75	2.1	2.71428571428571	1.5	1.21428571428571	2.5	5.5	7.85714285714286
2	36	2.55	0	5.90909090909091	7.58333333333333	5.41666666666667	5.40909090909091	2.55	3.14285714285714	1.75	1.78571428571429	2.4375	4.9375	7.3125
2	37	2.1	0	6.1	7.625	5.68181818181818	5.25	2.1	2.9375	2	1.5	2.5	5.125	7
2	38	2.05	0	5.77272727272727	7.27272727272727	5.25	5.33333333333333	2.05	2.71428571428571	1.5	1.57142857142857	2.625	5.1875	7.0625
2	39	2.55555555555556	0	5.9	7.41666666666667	5.125	5.31818181818182	2.55555555555556	2.5625	1.64285714285714	1.57142857142857	2.5	6.1875	7.1875
2	40	2.1	0	5.65	6.95454545454545	5.18181818181818	5	2.1	2.92857142857143	1.9	1.42857142857143	2.6875	5.75	7.78571428571429
2	41	2.27777777777778	0	5.55	7.91666666666667	5	5.25	2.27777777777778	3.0625	1.75	1.28571428571429	2.4375	5.375	6.3125
2	42	2.35	0	5.95	8.33333333333333	4.79166666666667	5.59090909090909	2.35	2.75	1.83333333333333	1.64285714285714	2.5625	5.75	6.9375
2	43	2.05555555555556	0	5.4	10.1818181818182	5.22727272727273	5.16666666666667	2.05555555555556	3.28571428571429	1.75	1.57142857142857	2.4375	5.25	7.3125
2	44	2.05555555555556	0	5.6	9.83333333333333	5.16666666666667	4.95833333333333	2.05555555555556	2.8125	1.6	1.5	3.125	5.375	5.9375
2	45	2.16666666666667	0	5.65	9.83333333333333	4.875	4.40909090909091	2.16666666666667	3.07142857142857	1.58333333333333	1.6875	3	5	6.33333333333333
2	46	2.61111111111111	0	5.54545454545455	9.09090909090909	5.09090909090909	5.04166666666667	2.61111111111111	3.0625	2.08333333333333	1.57142857142857	2.75	5.25	5.8125
2	47	2.22222222222222	0	6	11.4166666666667	5.25	4.75	2.22222222222222	3	1.25	1.75	2.75	5.21428571428571	6.625
2	48	2.38888888888889	0	5.85	10.3333333333333	5.31818181818182	5.04545454545455	2.38888888888889	2.875	1.3	1.64285714285714	2.9375	4.8125	6.72222222222222
3	1	0.5	2.66666666666667	4.83333333333333	5	9.20833333333333	5.25	0.5	4.75	4.75	4.68181818181818	4.95454545454545	6.41666666666667	6.92307692307692
3	2	0.5	2.71428571428571	4.86363636363636	4.54545454545455	10.5	5.13636363636364	0.5	4.72727272727273	4.70833333333333	5.13636363636364	5.31818181818182	6	6.25
3	3	0.5	2.63333333333333	4.63636363636364	4.54166666666667	9.625	5.09090909090909	0.5	4.72727272727273	4.75	5.15	5.13636363636364	10.3333333333333	6.5
3	4	0.7	2.67857142857143	4.5	4.33333333333333	9.5	5.04166666666667	0.7	4.68181818181818	4.5	5.4	5.13636363636364	7.45	5.70833333333333
3	5	0.583333333333333	2.53571428571429	4.59090909090909	4.29166666666667	9.375	5.27272727272727	0.583333333333333	4.54166666666667	4.66666666666667	5.1	5.45454545454545	7.25	6.15
3	6	0.611111111111111	2.64285714285714	4.59090909090909	4.66666666666667	10.1818181818182	5.08333333333333	0.611111111111111	4.72727272727273	4.79166666666667	4.79166666666667	5.45454545454545	6.33333333333333	6.13636363636364
3	7	0.722222222222222	2.64285714285714	4.68181818181818	4.5	9.16666666666667	5	0.722222222222222	4.63636363636364	4.54166666666667	5.22727272727273	5.65	5.91666666666667	5.54545454545455
3	8	0.7	2.63333333333333	4.65	5.125	9.66666666666667	5	0.7	4.59090909090909	4.59090909090909	4.65	5.77272727272727	6.45454545454545	5.90909090909091
3	9	0.681818181818182	2.6	4.63636363636364	4.95833333333333	9.41666666666667	5.125	0.681818181818182	4.66666666666667	4.625	4.85	5.31818181818182	5.86363636363636	6.36363636363636
3	10	0.678571428571429	2.5	4.68181818181818	4.95833333333333	9.79166666666667	5	0.678571428571429	4.68181818181818	4.54545454545455	4.86363636363636	5.09090909090909	7.04166666666667	6.09090909090909
3	11	0.75	2.64285714285714	4.45	4.66666666666667	11.0833333333333	5.22727272727273	0.75	4.05	4.58333333333333	5.22727272727273	5.05	7.13636363636364	6.70833333333333
3	12	0.678571428571429	2.53571428571429	4.59090909090909	4.45454545454545	10.9166666666667	5.09090909090909	0.678571428571429	4.66666666666667	4.70833333333333	5.4	4.95454545454545	5.66666666666667	6.65384615384615
3	13	0.730769230769231	2.61538461538462	4.59090909090909	4.75	11.4166666666667	5.04166666666667	0.730769230769231	4.63636363636364	4.70833333333333	4.75	5.25	5.83333333333333	5.53846153846154
3	14	0.727272727272727	2.53571428571429	4.7	5.25	11.3333333333333	4.86363636363636	0.727272727272727	4.68181818181818	4.5	4.90909090909091	5.31818181818182	7.66666666666667	6.125
3	15	0.692307692307692	2.57142857142857	4.59090909090909	5.08333333333333	11.0833333333333	5.04545454545455	0.692307692307692	4.59090909090909	4.75	5.05	5.22727272727273	7.31818181818182	5.92307692307692
3	16	0.766666666666667	2.57142857142857	4.45454545454545	5.16666666666667	11.25	5.125	0.766666666666667	4.70833333333333	4.75	4.95	4.70833333333333	6.375	6.42307692307692
3	17	0.733333333333333	2.61538461538462	4.77272727272727	4.83333333333333	11.25	5.31818181818182	0.733333333333333	4.63636363636364	4.40909090909091	5.04545454545455	5.72727272727273	7.31818181818182	5.76923076923077
3	18	0.8125	2.60714285714286	4.45454545454545	5.125	10.9166666666667	5.31818181818182	0.8125	4.59090909090909	4.66666666666667	4.4	5.45454545454545	6.91666666666667	5.92307692307692
3	19	0.8125	2.61538461538462	4.63636363636364	5.20833333333333	11	5.125	0.8125	4.66666666666667	4.66666666666667	4.75	5.1	7.68181818181818	6.03846153846154
3	20	0.823529411764706	2.71428571428571	4.68181818181818	4.75	10.7916666666667	5.09090909090909	0.823529411764706	4.72727272727273	4.54545454545455	5.22727272727273	5.36363636363636	6.04166666666667	5.66666666666667
3	21	0.888888888888889	2.57692307692308	4.45	4.375	11.125	5	0.888888888888889	4.75	4.70833333333333	4.45	5.09090909090909	5.95454545454545	5.82142857142857
3	22	0.911764705882353	2.57142857142857	4.72727272727273	4.625	11.2692307692308	5.22727272727273	0.911764705882353	4.875	4.45833333333333	4.45	6.125	7.5	6.08333333333333
3	23	1.02941176470588	2.39285714285714	4.6	4.625	11.375	5.41666666666667	1.02941176470588	4.72727272727273	4.72727272727273	4.44444444444444	6	5.95454545454545	5.69230769230769
3	24	0.916666666666667	2.57692307692308	4.54545454545455	4.77272727272727	11.1666666666667	5.31818181818182	0.916666666666667	4.70833333333333	4.625	4.4	5.25	7.08333333333333	5.70833333333333
3	25	0.944444444444444	2.53846153846154	4.86363636363636	4.625	11.2916666666667	5.04166666666667	0.944444444444444	4.72727272727273	4.68181818181818	4.25	5.36363636363636	6.36363636363636	6.15384615384615
3	26	0.973684210526316	2.46428571428571	4.40909090909091	4.375	10.9583333333333	5.18181818181818	0.973684210526316	4.75	4.83333333333333	4.55	5.59090909090909	6.79166666666667	5.69230769230769
3	27	0.944444444444444	2.32142857142857	4.72727272727273	4.54166666666667	10.9166666666667	5	0.944444444444444	4.63636363636364	5	4.33333333333333	5.15	6.36363636363636	5.33333333333333
3	28	1	2.43333333333333	4.68181818181818	4.41666666666667	11.5416666666667	5	1	4.79166666666667	4.31818181818182	4.22222222222222	5.36363636363636	8.79166666666667	5.53846153846154
3	29	0.975	2.5	4.54545454545455	5.125	11.0769230769231	4.95454545454545	0.975	4.81818181818182	4.75	4.16666666666667	5.13636363636364	7.68181818181818	5.80769230769231
3	30	1	2.3125	4.77272727272727	5.25	11.1666666666667	5.16666666666667	1	4.75	4.63636363636364	4.27777777777778	5.27272727272727	8.40909090909091	5.30769230769231
3	31	1	2.28571428571429	4.45454545454545	5.04166666666667	10.8333333333333	4.95454545454545	1	4.58333333333333	4.875	4.33333333333333	5.45454545454545	8.125	5.34615384615385
3	32	1	2.3	4.5	4.625	10.75	5.08333333333333	1	4.81818181818182	4.22727272727273	4.55555555555556	5.27272727272727	7.22727272727273	6.03846153846154
3	33	1	2.21875	4.59090909090909	4.54545454545455	10.875	5.04545454545455	1	4.66666666666667	4.25	4.5	5.5	6.70833333333333	6.26923076923077
3	34	1	2.41176470588235	4.81818181818182	4.58333333333333	10.7307692307692	5.08333333333333	1	4.75	4.22727272727273	4.05555555555556	5.36363636363636	8.13636363636364	5.84615384615385
3	35	1	2.16666666666667	4.36363636363636	4.72727272727273	11.125	4.95454545454545	1	4.68181818181818	4.20833333333333	4.05555555555556	5.13636363636364	7.58333333333333	5.88461538461539
3	36	1	2.3	4.70833333333333	5.04166666666667	11.1666666666667	5.125	1	4.66666666666667	3.95454545454545	4.27777777777778	5.6	6.59090909090909	5.96153846153846
3	37	1	2.0625	4.18181818181818	4.54166666666667	11.0416666666667	4.90909090909091	1	4.70833333333333	4.27272727272727	4.11111111111111	5.13636363636364	7.45454545454545	5.73076923076923
3	38	1	2.125	4.5	4.5	10.875	4.875	1	4.77272727272727	4.29166666666667	3.88888888888889	5.40909090909091	6.875	6.07692307692308
3	39	1	2.06666666666667	4.25	5.29166666666667	10.3333333333333	5.40909090909091	1	4.70833333333333	4.27272727272727	4.55555555555556	5.5	6.77272727272727	6.73076923076923
3	40	1.02272727272727	1.90625	4.13636363636364	5.16666666666667	9.45833333333333	5.25	1.02272727272727	4.70833333333333	5	4.55555555555556	5	6.81818181818182	5.89285714285714
3	41	1	2	4.16666666666667	5.04166666666667	9.625	5.04545454545455	1	4.63636363636364	4.86363636363636	4.4	5.59090909090909	6.04166666666667	6.65384615384615
3	42	1.16666666666667	1.90625	4.54545454545455	5.04166666666667	9.69230769230769	5.5	1.16666666666667	4.83333333333333	4.86363636363636	4.44444444444444	5.40909090909091	6	5.84615384615385
3	43	1.21052631578947	1.96875	4.08333333333333	4.5	10.125	5.04166666666667	1.21052631578947	4.63636363636364	4.72727272727273	4.5	4.86363636363636	6.125	6.96153846153846
3	44	1.33333333333333	1.52631578947368	4.18181818181818	4.5	9.66666666666667	5.09090909090909	1.33333333333333	4.75	5.40909090909091	4.75	5.13636363636364	6.04545454545455	6.21428571428571
3	45	1.36111111111111	1.61764705882353	4.25	4.5	9.81818181818182	5.45833333333333	1.36111111111111	4.54166666666667	5.25	4.33333333333333	5.13636363636364	5.81818181818182	6.76923076923077
3	46	1.38235294117647	1.86666666666667	4.13636363636364	5.125	8.66666666666667	4.90909090909091	1.38235294117647	4.63636363636364	5.36363636363636	4.55	5.72727272727273	6.5	6.65384615384615
3	47	1.625	1.44444444444444	3.95833333333333	5.18181818181818	9.04166666666667	5	1.625	4.58333333333333	5.27272727272727	4.45	5.45454545454545	5.72727272727273	6.03846153846154
3	48	1.28947368421053	1.65625	4.08333333333333	5.125	9.79166666666667	5.13636363636364	1.28947368421053	4.625	5.6	4.4	5.4	5.5	6.30769230769231
4	1	1	2.75	3.73529411764706	3.84375	3.76470588235294	3.64285714285714	3.88235294117647	3.76666666666667	4.25	4.8	5.26666666666667	5.21428571428571	3.64285714285714
4	2	0	2.85294117647059	3.78125	4	3.84375	3.84615384615385	3.8125	3.83333333333333	4.66666666666667	4.75	5	5	3.84615384615385
4	3	0	2.83333333333333	3.82352941176471	3.78125	3.6875	3.69230769230769	3.6875	3.7	4.6875	4.83333333333333	5.33333333333333	5.26923076923077	3.69230769230769
4	4	0	3.30555555555556	3.71875	3.73333333333333	3.84375	3.61538461538462	3.84375	3.83333333333333	4.86666666666667	4.82142857142857	5.35714285714286	5.21428571428571	3.61538461538462
4	5	0	3	3.84375	3.9375	3.875	3.80769230769231	3.8125	4.1	4.76666666666667	4.67857142857143	5.28571428571429	5.5	3.80769230769231
4	6	0	2.88235294117647	3.6875	3.84375	3.78125	3.73076923076923	3.84375	3.89285714285714	4.53333333333333	4.92857142857143	5.03333333333333	5.25	3.73076923076923
4	7	0	3	3.65625	3.9	3.78125	4	3.6875	3.7	4.66666666666667	4.78571428571429	5.21428571428571	5.26923076923077	4
4	8	0	2.82352941176471	3.71875	3.875	4	3.57692307692308	3.53125	3.7	4.53333333333333	4.53571428571429	5.17857142857143	5.26923076923077	3.57692307692308
4	9	0	2.82352941176471	3.67647058823529	3.96875	3.6875	4	3.78125	3.96428571428571	4.03333333333333	4.82142857142857	5.17857142857143	5.17857142857143	4
4	10	0	2.88235294117647	3.6875	3.8125	3.8125	3.76923076923077	3.53333333333333	3.73333333333333	4.53333333333333	4.60714285714286	5.14285714285714	5.23076923076923	3.76923076923077
4	11	0	3	3.6875	3.96875	3.8125	3.73076923076923	3.78125	3.85714285714286	4.23333333333333	4.89285714285714	5.10714285714286	5.15384615384615	3.73076923076923
4	12	0	2.94117647058824	3.65625	4.03125	3.83333333333333	4.11538461538461	4.0625	3.76666666666667	4	4.75	5.14285714285714	5.32142857142857	4.11538461538461
4	13	0	2.76470588235294	3.65625	4	3.9375	3.53846153846154	4.40625	3.83333333333333	4.53333333333333	4.8	4.82142857142857	5.19230769230769	3.53846153846154
4	14	0	3.11111111111111	3.76470588235294	4.06666666666667	3.78125	4.30769230769231	4.33333333333333	3.78571428571429	4.43333333333333	5.03571428571429	5	5.07692307692308	4.30769230769231
4	15	0	2.86111111111111	3.78125	4.09375	3.78125	4.23076923076923	4.03125	3.86666666666667	4.23333333333333	5	5.25	5.17857142857143	4.23076923076923
4	16	0	2.82352941176471	3.84375	4	4	4.53846153846154	3.93333333333333	3.89285714285714	4.7	4.78571428571429	4.92307692307692	5.19230769230769	4.53846153846154
4	17	0	2.91176470588235	3.75	3.9375	3.65625	4.57692307692308	4.125	4.03333333333333	4.33333333333333	4.63333333333333	5.39285714285714	5.23076923076923	4.57692307692308
4	18	0	2.82352941176471	3.6875	3.9375	3.8125	4.57692307692308	4.125	3.96666666666667	4.46428571428571	4.71428571428571	5.32142857142857	5.28571428571429	4.57692307692308
4	19	0	2.97058823529412	3.8125	4.0625	3.78125	4.80769230769231	4.13333333333333	3.92857142857143	4.4	5	5.14285714285714	5.19230769230769	4.80769230769231
4	20	0	3	3.625	3.9375	3.84375	5	4.25	3.86666666666667	4.23333333333333	4.93333333333333	5.10714285714286	5.11538461538461	5
4	21	0	2.94444444444444	3.625	3.875	3.83333333333333	4.84615384615385	3.90625	3.82142857142857	3.75	5	5.21428571428571	5.10714285714286	4.84615384615385
4	22	0	2.80555555555556	3.5625	3.9375	3.90625	4.96153846153846	3.86666666666667	4.03333333333333	4.26666666666667	4.71428571428571	5.28571428571429	5.11538461538461	4.96153846153846
4	23	0	2.67647058823529	3.59375	4.0625	3.84375	5	4	3.96666666666667	4.67857142857143	4.86666666666667	5.07142857142857	5.11538461538461	5
4	24	0	2.73529411764706	3.75	4.0625	3.71875	4.96153846153846	3.9	3.85714285714286	4.73333333333333	4.82142857142857	5.14285714285714	5.21428571428571	4.96153846153846
4	25	0	2.79411764705882	3.75	4	3.875	4.92857142857143	3.6875	4.03333333333333	4.64285714285714	4.82142857142857	5.25	5.19230769230769	4.92857142857143
4	26	0	2.73529411764706	3.53125	3.9375	3.83333333333333	4.76923076923077	3.6	4.14285714285714	4.07142857142857	4.82142857142857	5.10714285714286	5.14285714285714	4.76923076923077
4	27	0	2.79411764705882	3.46875	3.96875	3.9375	4.96153846153846	3.78125	3.96666666666667	4.10714285714286	4.86666666666667	5.03571428571429	5.15384615384615	4.96153846153846
4	28	0	2.80555555555556	3.59375	3.8125	3.84375	4.96428571428571	3.66666666666667	3.75	4.07142857142857	4.75	5.21428571428571	5.11538461538461	4.96428571428571
4	29	0	2.61764705882353	3.61764705882353	3.88235294117647	3.73333333333333	4.69230769230769	3.875	3.76666666666667	4.21428571428571	4.78571428571429	5.17857142857143	5.14285714285714	4.69230769230769
4	30	0	2.70588235294118	3.71875	3.96875	3.78125	5.03571428571429	3.7	3.89285714285714	4.32142857142857	4.75	5.14285714285714	5.19230769230769	5.03571428571429
4	31	0	2.82352941176471	3.6875	3.96875	4.03125	4.96428571428571	3.8125	3.75	4.28571428571429	4.64285714285714	5.17857142857143	5.15384615384615	4.96428571428571
4	32	0	2.76470588235294	3.76470588235294	4.1875	3.75	5.07142857142857	3.8	3.8	4.28571428571429	5	5.32142857142857	5.17857142857143	5.07142857142857
4	33	0	2.69444444444444	3.6875	4.375	3.9	5.25	3.53333333333333	3.67857142857143	4.46428571428571	4.73333333333333	5	5.11538461538461	5.25
4	34	0	2.70588235294118	3.67647058823529	4.23529411764706	4	5.10714285714286	3.84375	3.76666666666667	4.34615384615385	5.17857142857143	5	5.25	5.10714285714286
4	35	0	2.6875	3.5625	4.40625	3.90625	5.14285714285714	3.73333333333333	3.57142857142857	4.03571428571429	4.96428571428571	5.03571428571429	5.15384615384615	5.14285714285714
4	36	0	2.64705882352941	3.47058823529412	4.46875	3.83333333333333	5.17857142857143	3.75	3.43333333333333	4.21428571428571	4.78571428571429	5.14285714285714	5.15384615384615	5.17857142857143
4	37	0	2.59375	3.52941176470588	4.25	3.78125	5.21428571428571	3.66666666666667	3.28571428571429	4.34615384615385	5.07142857142857	5.35714285714286	5.07142857142857	5.21428571428571
4	38	0.5	2.58823529411765	3.53125	4.25	3.8125	5.16666666666667	3.63333333333333	3.26666666666667	4.42857142857143	5.07142857142857	5.17857142857143	5.11538461538461	5.16666666666667
4	39	0.75	2.65625	3.58823529411765	4.11764705882353	3.76666666666667	5	3.625	3.07142857142857	4.42857142857143	5.13333333333333	5.25	5.11538461538461	5
4	40	0	2.5	3.41176470588235	4.28125	3.875	5.17857142857143	3.7	3.3	4.23076923076923	4.85714285714286	5.17857142857143	5.07142857142857	5.17857142857143
4	41	0.625	2.8125	3.61764705882353	4.28125	3.8125	5.16666666666667	3.43333333333333	3.63333333333333	4.32142857142857	4.92857142857143	5.19230769230769	5.11538461538461	5.16666666666667
4	42	0.7	2.6875	3.55882352941176	4.14705882352941	3.78125	5.07142857142857	3.7	3.73333333333333	4	5.07142857142857	5	4.84615384615385	5.07142857142857
4	43	0.85	2.59375	3.67647058823529	4.03125	3.86666666666667	5.16666666666667	3.63333333333333	3.4	4.11538461538461	5.14285714285714	5.07142857142857	4.96153846153846	5.16666666666667
4	44	0.833333333333333	2.40625	3.67647058823529	4	3.75	4.89285714285714	3.76666666666667	3.5	4.10714285714286	5.07142857142857	5.10714285714286	4.82142857142857	4.89285714285714
4	45	0.916666666666667	2.06666666666667	3.77777777777778	4.0625	3.8125	5.16666666666667	3.43333333333333	3.46666666666667	3.69230769230769	4.82142857142857	5.28571428571429	5.15384615384615	5.16666666666667
4	46	1	1.94117647058824	3.47058823529412	3.9375	3.875	5.10714285714286	3.73333333333333	3.78571428571429	3.92307692307692	4.96428571428571	5.34615384615385	4.69230769230769	5.10714285714286
4	47	0.958333333333333	1.96666666666667	3.32352941176471	3.97058823529412	3.93333333333333	4.86666666666667	3.6875	3.63333333333333	4	4.78571428571429	5.07142857142857	4.92307692307692	4.86666666666667
4	48	1	1.875	3.55882352941176	4.09375	3.875	4.96666666666667	3.66666666666667	4.15625	3.39285714285714	5	5.17857142857143	4.61538461538461	4.96666666666667
5	1	0.961538461538462	3.89285714285714	5.47058823529412	6.29411764705882	4.53333333333333	4.26666666666667	0.961538461538462	3.90625	4.3	3.86666666666667	2.92857142857143	2.67857142857143	2.76923076923077
5	2	0.964285714285714	3.58333333333333	5.5	5.75	4.16666666666667	4.25	0.964285714285714	3.86666666666667	4	4	2.89285714285714	2.92307692307692	2.83333333333333
5	3	1.13157894736842	3.5	5.46875	5.75	4.46666666666667	4.13333333333333	1.13157894736842	3.76666666666667	4.1	3.7	2.53571428571429	2.75	2.86666666666667
5	4	1.1	3.92307692307692	5.5	5.59375	4.32142857142857	4.28571428571429	1.1	3.8	4.03333333333333	3.57142857142857	2.53846153846154	2.23076923076923	3.07142857142857
5	5	1.13888888888889	3.42307692307692	5.5	6.0625	4.3	4.21428571428571	1.13888888888889	3.57142857142857	3.96428571428571	3.73333333333333	2.71428571428571	2.26923076923077	3
5	6	1.11111111111111	3.375	5.5	6.34375	4.5	4.32142857142857	1.11111111111111	3.86666666666667	4	3.76666666666667	2.38461538461538	2.07142857142857	3
5	7	1.05882352941176	3.38461538461538	5.5	6.21875	4.36666666666667	4.13333333333333	1.05882352941176	4.17857142857143	4.21428571428571	3.53571428571429	2.5	1.79166666666667	2.92307692307692
5	8	1.1	3.29166666666667	5.5	5.875	4.10714285714286	4.17857142857143	1.1	4.13333333333333	3.96666666666667	3.57142857142857	2.5	1.69230769230769	2.82142857142857
5	9	0.973684210526316	3.53846153846154	5.5	5.5	3.9	4.10714285714286	0.973684210526316	4.07142857142857	4.03571428571429	3.8	2.78571428571429	1.54166666666667	2.96153846153846
5	10	1.47058823529412	3.73076923076923	5.5	5.5	4.13333333333333	4.07142857142857	1.47058823529412	4.03333333333333	4.23333333333333	3.67857142857143	2.57692307692308	1.53846153846154	3.15384615384615
5	11	1.11764705882353	3.76923076923077	5.46875	5.5	4.10714285714286	4.13333333333333	1.11764705882353	3.78571428571429	4.35714285714286	3.35714285714286	2.32142857142857	1.34615384615385	3.19230769230769
5	12	1.3	3.20833333333333	5.40625	5.5	4.1	4.10714285714286	1.3	4.14285714285714	4.2	4	2.5	1.25	2.92307692307692
5	13	1.14285714285714	3.29166666666667	5.40625	5.5	4.14285714285714	4.03571428571429	1.14285714285714	4.03333333333333	4.33333333333333	3.89285714285714	2.46428571428571	1.27272727272727	2.92307692307692
5	14	1.20833333333333	3.25	5.3125	5.5	4.06666666666667	4.03333333333333	1.20833333333333	3.92857142857143	4.32142857142857	3.93333333333333	2.03571428571429	1.91666666666667	2.85714285714286
5	15	1.15384615384615	3	5.16666666666667	5.4375	4.17857142857143	4	1.15384615384615	4.21428571428571	4.1	3.64285714285714	2.07692307692308	1.80769230769231	2.80769230769231
5	16	1.39285714285714	3.5	5.3125	5.28125	4.46666666666667	4.03571428571429	1.39285714285714	4.03333333333333	4.32142857142857	3.75	2.17857142857143	2	2.88461538461538
5	17	1.4375	3.79166666666667	5.21875	5.46875	4.4	4.03333333333333	1.4375	4.14285714285714	4.16666666666667	3.76666666666667	2.10714285714286	2.20833333333333	2.88461538461538
5	18	1.46153846153846	3.5	4.84375	5.625	4.28571428571429	4	1.46153846153846	4	3.9	3.78571428571429	2.30769230769231	2.88461538461538	3.15384615384615
5	19	1.25	3.45833333333333	4.8125	5.63333333333333	4.4	4.1	1.25	3.75	3.92857142857143	3.8	2.25	2.92857142857143	3
5	20	1.375	3.31818181818182	4.5625	5.84375	4.75	4.03571428571429	1.375	3.86666666666667	3.96666666666667	3.71428571428571	2.35714285714286	2.92307692307692	3.15384615384615
5	21	1.35714285714286	3.125	4.75	5.875	4.46666666666667	4.03333333333333	1.35714285714286	4	4.10714285714286	3.53333333333333	2.23076923076923	3.10714285714286	3.03846153846154
5	22	2.07142857142857	2.79166666666667	4.53125	5.96875	4.26666666666667	4	2.07142857142857	4.14285714285714	4.16666666666667	3.89285714285714	1.96428571428571	3.03846153846154	3.14285714285714
5	23	1.9	3.70833333333333	4.5	6.15625	4.67857142857143	4.03333333333333	1.9	4.06666666666667	3.93333333333333	3.60714285714286	2.10714285714286	2.89285714285714	3.32142857142857
5	24	1.4375	3.5	4.5	5.84375	4.6	4.07142857142857	1.4375	3.67857142857143	4.17857142857143	3.53571428571429	2.23076923076923	2.88461538461538	3.53846153846154
5	25	1.82142857142857	3.13636363636364	4.5625	6.15625	4.66666666666667	3.96666666666667	1.82142857142857	4.21428571428571	4	3.67857142857143	2.30769230769231	2.84615384615385	3.78571428571429
5	26	2.10714285714286	2.77272727272727	4.46875	5.94117647058824	4.5	4	2.10714285714286	3.89285714285714	3.83333333333333	3.10714285714286	2.78571428571429	3.15384615384615	3.85714285714286
5	27	2.26923076923077	2.63636363636364	4.5	6.5	4.7	4	2.26923076923077	3.96666666666667	3.82142857142857	3.21428571428571	3.07142857142857	2.39285714285714	3.78571428571429
5	28	2.65384615384615	2	4.4375	6.5625	4.43333333333333	4.03333333333333	2.65384615384615	4.25	4.46666666666667	3.17857142857143	2.53571428571429	2.57142857142857	3.78571428571429
5	29	2.54166666666667	2.04545454545455	4.5	6.5	4.42857142857143	3.96428571428571	2.54166666666667	4.35714285714286	4.07142857142857	3.21428571428571	2.84615384615385	2.03846153846154	3.89285714285714
5	30	2.65384615384615	1.95454545454545	4.46875	6.5	4.36666666666667	3.96666666666667	2.65384615384615	3.96428571428571	4	3.16666666666667	2.5	1.80769230769231	4.53571428571429
5	31	3.20833333333333	2.09090909090909	4.46875	6.40625	4.36666666666667	3.82142857142857	3.20833333333333	4.26666666666667	4.28571428571429	3	2.73076923076923	1.92307692307692	4.85714285714286
5	32	3.34615384615385	2.125	4.4375	6	4.4	3.83333333333333	3.34615384615385	3.96428571428571	4.06666666666667	3.07142857142857	2.76923076923077	1.92307692307692	4.86666666666667
5	33	3.46153846153846	2	4.34375	5.75	4.53571428571429	3.78571428571429	3.46153846153846	4	4	3.17857142857143	2.64285714285714	1.75	4.78571428571429
5	34	3.57692307692308	2	4.4	5.5	4.53333333333333	4.13333333333333	3.57692307692308	4	4.07142857142857	2.96428571428571	2.96153846153846	1.5	4.4
5	35	3.5	1.5	4.5	5.46875	4.33333333333333	3.76666666666667	3.5	3.82142857142857	4.39285714285714	2.92857142857143	2.85714285714286	1.96153846153846	4.67857142857143
5	36	3.5	1.45	4.46666666666667	5.52941176470588	4.26666666666667	3.75	3.5	3.89285714285714	4.2	2.96428571428571	2.45833333333333	2.18181818181818	4.56666666666667
5	37	3.53846153846154	1.3	4.375	5.6875	4.93333333333333	4.03333333333333	3.53846153846154	3.9	4.14285714285714	3.07692307692308	2.84615384615385	2.65384615384615	4.43333333333333
5	38	3.35714285714286	1.31818181818182	4.26666666666667	6.03125	5.13333333333333	4.10714285714286	3.35714285714286	3.85714285714286	3.8	2.64285714285714	2.96153846153846	2.5	4.5
5	39	3.57692307692308	1.27777777777778	4.1875	6.375	5.375	4.1	3.57692307692308	4.03571428571429	4.10714285714286	2.96428571428571	3.93333333333333	2.96666666666667	5.03333333333333
5	40	3.64285714285714	1.69230769230769	4.3	6.14705882352941	5.46666666666667	3.78571428571429	3.64285714285714	4.1	3.7	3.17857142857143	3.53333333333333	3.25	4.66666666666667
5	41	3.65384615384615	1.7	4.2	6.375	5.375	3.76666666666667	3.65384615384615	4.03571428571429	3.92857142857143	2.71428571428571	3.17857142857143	3.07142857142857	4.5
5	42	3.57142857142857	1.58333333333333	4.25	6.3125	5.43333333333333	3.89285714285714	3.57142857142857	4.07142857142857	3.66666666666667	2.92857142857143	3.14285714285714	3.11538461538462	4.5
5	43	3.57142857142857	1	4.13333333333333	6.14705882352941	5.4375	4.2	3.57142857142857	4.03333333333333	4	3.07142857142857	3	3.28571428571429	4.96666666666667
5	44	4.11538461538461	1.45	4.23333333333333	6.34375	5.46666666666667	4	4.11538461538461	3.96428571428571	3.57142857142857	3.32142857142857	2.85714285714286	2.89285714285714	5.2
5	45	4.34615384615385	1.05	4.33333333333333	6.35294117647059	5.4375	3.71428571428571	4.34615384615385	4.03333333333333	4.03333333333333	3.07142857142857	2.84615384615385	3.10714285714286	5.56666666666667
5	46	4.15384615384615	1.25	4.25	6.59375	5.28125	3.8	4.15384615384615	3.92857142857143	3.71428571428571	3.10714285714286	2.64285714285714	3.03846153846154	5.375
5	47	4.25	1.36363636363636	4.06666666666667	6.5	5.4	4.35714285714286	4.25	4.03333333333333	3.56666666666667	2.96428571428571	2.71428571428571	2.67857142857143	5.36666666666667
5	48	4.15384615384615	1.41666666666667	3.96666666666667	6.15625	5.5	4.16666666666667	4.15384615384615	3.75	3.89285714285714	3.03571428571429	2.85714285714286	3.19230769230769	5.43333333333333
6	1	0.5	1.15789473684211	3.16666666666667	2.875	3.23333333333333	0.973684210526316	5.375	3.92857142857143	4.42307692307692	3.34615384615385	0.75	0	0.973684210526316
6	2	0.5	1.08333333333333	3.70833333333333	3.10714285714286	3.26666666666667	0.80952380952381	5.5	3.76923076923077	4.53846153846154	3.19230769230769	1.08333333333333	0	0.80952380952381
6	3	0.5	1.17647058823529	3.57692307692308	3.13333333333333	3.35714285714286	1	5.13636363636364	4	4.19230769230769	3.5	0.884615384615385	0	1
6	4	0.5	1.26666666666667	3.45454545454545	2.96666666666667	3.25	0.868421052631579	5.04545454545455	4.19230769230769	4.42307692307692	3.45833333333333	0.730769230769231	0	0.868421052631579
6	5	0.5	1.11764705882353	3.86363636363636	2.9	3.06666666666667	0.8	4.875	4.38461538461539	4.03846153846154	3.41666666666667	0.545454545454545	0	0.8
6	6	0.5	1.02941176470588	3.6	2.83333333333333	3.33333333333333	1.05882352941176	4.95454545454545	4.03846153846154	4.29166666666667	3.65384615384615	0.791666666666667	0	1.05882352941176
6	7	0.5	0.894736842105263	3.63636363636364	3.03333333333333	3.16666666666667	1.02941176470588	4.81818181818182	4.30769230769231	4.38461538461539	3.41666666666667	0.708333333333333	0	1.02941176470588
6	8	0.5	1	3.73076923076923	2.53571428571429	3.32142857142857	1.11764705882353	4.5	4.5	4.19230769230769	3.33333333333333	0.666666666666667	0	1.11764705882353
6	9	0.5	0.947368421052632	3.83333333333333	2.92857142857143	3.4	0.973684210526316	4.68181818181818	4.46153846153846	4.42307692307692	3.53846153846154	0.576923076923077	0	0.973684210526316
6	10	0.5	0.944444444444444	3.375	3	3.26666666666667	1.14705882352941	4.55	4.58333333333333	4.66666666666667	3.375	0.636363636363636	0	1.14705882352941
6	11	0.5	0.875	3.59090909090909	3.06666666666667	3.23333333333333	0.925	4.54166666666667	4.30769230769231	4.46153846153846	3.5	0.666666666666667	0	0.925
6	12	0.5	0.888888888888889	3.86363636363636	2.86666666666667	3.28571428571429	1.05555555555556	4.68181818181818	4.23076923076923	4.46153846153846	3.46153846153846	0.625	0	1.05555555555556
6	13	0.5	0.815789473684211	3.78571428571429	3.14285714285714	3.46666666666667	1.125	4.27272727272727	4.29166666666667	4.5	3.45833333333333	0.708333333333333	0	1.125
6	14	0.566666666666667	0.842105263157895	3.92307692307692	2.83333333333333	3.21428571428571	0.875	4.45454545454545	4.46153846153846	4.5	3.375	0.583333333333333	0	0.875
6	15	0.5	0.894736842105263	3.76666666666667	3	3.46666666666667	0.894736842105263	4.36363636363636	4.26923076923077	4.30769230769231	3.26923076923077	0.576923076923077	0	0.894736842105263
6	16	0.558823529411765	0.833333333333333	3.66666666666667	3.06666666666667	3.17857142857143	1.02777777777778	4.54545454545455	4.11538461538461	4.29166666666667	3.5	0.541666666666667	0	1.02777777777778
6	17	0.5	0.815789473684211	3.46875	3.03333333333333	3.36666666666667	0.944444444444444	4.59090909090909	4.25	4.34615384615385	3.41666666666667	0.692307692307692	0	0.944444444444444
6	18	0.566666666666667	0.916666666666667	3.66666666666667	2.96428571428571	3.26666666666667	0.805555555555556	4.54166666666667	4.38461538461539	4.42307692307692	3.46153846153846	0.583333333333333	0	0.805555555555556
6	19	0.558823529411765	0.90625	3.1875	3.33333333333333	3.32142857142857	0.904761904761905	4.86363636363636	4.25	4.33333333333333	3.375	0.5	0	0.904761904761905
6	20	0.525	0.882352941176471	3.23333333333333	3.2	3.4	1.0625	4.70833333333333	4.34615384615385	4.25	3.33333333333333	0.541666666666667	0	1.0625
6	21	0.578947368421053	0.947368421052632	3.28125	3.06666666666667	3.4	1.08333333333333	4.54166666666667	4.125	4.34615384615385	3.23076923076923	0.615384615384615	0	1.08333333333333
6	22	0.527777777777778	0.95	3.25	3.36666666666667	3.32142857142857	0.894736842105263	4.27272727272727	4.46153846153846	4.29166666666667	3.16666666666667	0.5	0	0.894736842105263
6	23	0.625	0.921052631578947	3.23529411764706	3.4	3.5	1.11111111111111	4.70833333333333	4.20833333333333	4.42307692307692	3.34615384615385	0.607142857142857	0	1.11111111111111
6	24	0.7	0.916666666666667	3.32142857142857	3.3	3.23333333333333	1.17647058823529	4.125	4.25	4.54166666666667	3.16666666666667	0.59375	0	1.17647058823529
6	25	0.666666666666667	0.775	3.17647058823529	3.03125	3	1.38235294117647	4.5	4.26923076923077	4.25	3.20833333333333	0.615384615384615	0	1.38235294117647
6	26	0.6	0.85	3.4	3.5	3.26666666666667	1.875	4.33333333333333	4.25	4.20833333333333	3.07692307692308	0.59375	0	1.875
6	27	0.666666666666667	0.6875	3	3.28125	3.09375	1.64285714285714	4.20833333333333	4.375	4.45833333333333	3.16666666666667	0.65625	0	1.64285714285714
6	28	0.75	0.59375	2.96875	3.43333333333333	3.53571428571429	1.5	4.5	4	3.88461538461538	3.29166666666667	0.6875	0	1.5
6	29	0.558823529411765	0.615384615384615	2.9375	3.28125	3.23333333333333	2.42307692307692	4.41666666666667	4.25	4.33333333333333	3.20833333333333	0.647058823529412	0	2.42307692307692
6	30	0.678571428571429	0.555555555555556	2.55882352941176	3.5	3.23333333333333	2.25	4.5	4	4.20833333333333	2.79166666666667	0.764705882352941	0	2.25
6	31	1.1	0.5	3.07142857142857	3.46875	3.26666666666667	1.83333333333333	4.33333333333333	3.81818181818182	4.04166666666667	3	0.605263157894737	0	1.83333333333333
6	32	0.714285714285714	0.5	2.76666666666667	3.375	3.53333333333333	3.04545454545455	4.58333333333333	3.86363636363636	4.08333333333333	3.04166666666667	0.684210526315789	0	3.04545454545455
6	33	0.6875	0.5	3.03333333333333	3.40625	3.39285714285714	2.70833333333333	4.25	4.3	3.66666666666667	2.83333333333333	0.694444444444444	0	2.70833333333333
6	34	0.714285714285714	0.5	2.83333333333333	3.15625	3.36666666666667	2.60714285714286	4.29166666666667	3.90909090909091	4.08333333333333	2.90909090909091	0.722222222222222	0	2.60714285714286
6	35	0.923076923076923	0.5	2.38235294117647	3.5625	3.60714285714286	2.32142857142857	4.04166666666667	4	3.70833333333333	2.66666666666667	0.676470588235294	0	2.32142857142857
6	36	0.730769230769231	0.5	2.57142857142857	3.3125	3.03333333333333	2.75	4.41666666666667	4.05	3.70833333333333	2.70833333333333	0.5625	0	2.75
6	37	0.863636363636364	0.5	2.71875	3.29411764705882	3.5	2.89285714285714	4.45454545454545	4.04545454545455	4	2.66666666666667	0.625	0	2.89285714285714
6	38	0.846153846153846	0.5	2.78571428571429	3	3.46666666666667	2.91666666666667	4.33333333333333	3.95	3.72727272727273	2.875	0.65625	0	2.91666666666667
6	39	1.1	0.5	2.71428571428571	3.09375	3.3	3.11538461538462	4.375	4.38888888888889	3.75	3.25	0.705882352941177	0	3.11538461538462
6	40	1.125	0.5	2.67857142857143	3.28125	3.46428571428571	2.09375	4.29166666666667	4.25	3.5	3.13636363636364	0.75	0	2.09375
6	41	1.05	0.5	2.57142857142857	3.375	3.42857142857143	2.35714285714286	4.29166666666667	4.25	3.75	2.75	0.666666666666667	0	2.35714285714286
6	42	1.1	0	2.34375	3	3.16666666666667	3.04166666666667	4.5	4.5	3.79166666666667	2.75	0.566666666666667	0	3.04166666666667
6	43	1.09090909090909	0	2.125	3.26470588235294	3.4	3.125	4.375	4.1	3.83333333333333	3	0.5	0	3.125
6	44	1.4375	0	2.5	3.15625	3.35714285714286	2.82142857142857	4.29166666666667	4.4	3.61538461538462	2.75	0.653846153846154	0	2.82142857142857
6	45	1.45	0	2.09375	3.02777777777778	3.33333333333333	3.33333333333333	4.33333333333333	4.9	3.41666666666667	2.83333333333333	0.615384615384615	0	3.33333333333333
6	46	1.5	0	2.15625	3.21875	3.36666666666667	3.29166666666667	4.41666666666667	4.7	3.625	2.91666666666667	0.583333333333333	0	3.29166666666667
6	47	1.72222222222222	0	2	3.17647058823529	3.60714285714286	3.40909090909091	4.41666666666667	4.15	3.57692307692308	2.54166666666667	0.571428571428571	0	3.40909090909091
6	48	1.3125	0	1.97222222222222	3.3125	3.36666666666667	2.85714285714286	4.5	4.55	3.41666666666667	2.66666666666667	0.6875	0	2.85714285714286
7	1	1.5	7.54761904761905	9.175	9.575	9.3421052631579	8.76315789473684	1.5	7.89473684210526	8.45	7.35	6.30555555555556	4.91666666666667	4.75
7	2	1.5	7.19047619047619	9.025	9.45	9.28947368421053	9.13888888888889	1.5	8.02777777777778	9.05	7.92105263157895	6.38888888888889	5.61764705882353	5.125
7	3	1.5	7.05	9.5	9.625	9.61111111111111	8.92105263157895	1.5	7.84210526315789	9.26315789473684	8.30555555555556	6.5	6.15384615384615	4.78125
7	4	1.46666666666667	7.2	9.73684210526316	10	9.27777777777778	9	1.46666666666667	7.88888888888889	9.26315789473684	8.13157894736842	6.29411764705882	5.32352941176471	4.76470588235294
7	5	1.5	6.97368421052632	9.73684210526316	9.92105263157895	9.52631578947368	9.05555555555556	1.5	7.92105263157895	9.3421052631579	8.18421052631579	6.5	4.88235294117647	4.96153846153846
7	6	1.5	7.225	9.57894736842105	10.0526315789474	9.86111111111111	9.02631578947368	1.5	7.58333333333333	9.07894736842105	8.58333333333333	6.64705882352941	5.71875	5
7	7	1.5	7.05	9.80555555555556	10	9.41666666666667	8.86111111111111	1.5	7.76315789473684	8.76315789473684	8.21052631578947	6.47058823529412	5.29411764705882	5.75
7	8	1.5	7.275	9.81578947368421	9.8421052631579	10.1944444444444	8.94444444444444	1.5	7.83333333333333	8.73684210526316	8	6.44444444444444	5.35294117647059	5.34375
7	9	1.5	7.5	9.81578947368421	10.0526315789474	10.2647058823529	8.91666666666667	1.5	7.77777777777778	9	8.05555555555556	6.47058823529412	5.21875	5.46875
7	10	1.51785714285714	6.95	9.26315789473684	10.1052631578947	9.86111111111111	8.92105263157895	1.51785714285714	7.63157894736842	9	8.57894736842105	6.58823529411765	5.20588235294118	5.71875
7	11	1.51724137931034	6.875	9.42105263157895	10.2631578947368	9.94444444444444	9.08333333333333	1.51724137931034	8	8.60526315789474	8.42105263157895	6.41666666666667	5.14705882352941	5.34375
7	12	1.48275862068966	7.275	9.36842105263158	9.75	10.1388888888889	9.07894736842105	1.48275862068966	7.63157894736842	8.97368421052632	8.11111111111111	6.47058823529412	5.3125	5.23529411764706
7	13	1.51724137931034	7.4	9.44444444444444	9.57894736842105	10.4210526315789	8.83333333333333	1.51724137931034	8.02777777777778	9.1	8.02631578947368	6.29411764705882	5.23529411764706	4.8125
7	14	1.5	7.35	9.68421052631579	9.36842105263158	10.3055555555556	8.8421052631579	1.5	7.63157894736842	8.73684210526316	8.25	6.41666666666667	5.21875	5.4375
7	15	1.5	7	9.63157894736842	9.63157894736842	10.0555555555556	9.11111111111111	1.5	8.02631578947368	9.07894736842105	8.21052631578947	6.55882352941176	5.44117647058824	5.59375
7	16	1.5	7.375	9.57894736842105	9.92105263157895	9.86111111111111	8.83333333333333	1.5	7.72222222222222	8.78947368421053	8.36111111111111	6.47058823529412	5.17647058823529	5.96875
7	17	1.75	7.375	9.31578947368421	9.73684210526316	10.1666666666667	8.75	1.75	7.86842105263158	9.21052631578947	8.31578947368421	6.69444444444444	5.125	5.53333333333333
7	18	1.63888888888889	7.45	9.26315789473684	9.73684210526316	10.3421052631579	9.80555555555556	1.63888888888889	7.86842105263158	8.94736842105263	8.07894736842105	6.35294117647059	5.17647058823529	5.5
7	19	1.54545454545455	7.85	9.3421052631579	10.025	10.0277777777778	9.05555555555556	1.54545454545455	8	8.60526315789474	8.07894736842105	6.47058823529412	5.02941176470588	5.53125
7	20	1.73076923076923	7	9.05263157894737	9.94736842105263	10.3947368421053	8.91666666666667	1.73076923076923	7.86842105263158	8.725	8.13888888888889	6.30555555555556	5.11764705882353	5.59375
7	21	1.85483870967742	7.35714285714286	9.02631578947368	10	10.2777777777778	9.52777777777778	1.85483870967742	7.73684210526316	8.81578947368421	8.21052631578947	6.41176470588235	5.15625	5.625
7	22	1.91666666666667	7.425	9.36842105263158	10.1315789473684	10.8055555555556	9	1.91666666666667	8.125	9.23684210526316	8.11111111111111	6.52941176470588	4.76470588235294	5.78125
7	23	1.7	7.475	9.36842105263158	10.225	10.2368421052632	9.02777777777778	1.7	8.05263157894737	8.68421052631579	7.89473684210526	6.47058823529412	4.9375	6
7	24	1.77586206896552	7.95	9.28947368421053	10.2105263157895	10.0555555555556	9.41666666666667	1.77586206896552	7.71052631578947	9.10526315789474	8.1578947368421	6.19444444444444	4.76470588235294	6.16666666666667
7	25	2.43478260869565	7.55	9.42105263157895	10.1842105263158	10.4473684210526	9.33333333333333	2.43478260869565	7.7	8.97368421052632	7.77777777777778	6.05882352941176	4.91176470588235	6.6875
7	26	2.34375	7.9	9.05	10.1578947368421	10.3888888888889	9.02777777777778	2.34375	8.07894736842105	8.69444444444444	8.19444444444444	6.29411764705882	4.91176470588235	6.96666666666667
7	27	2.36363636363636	7.5	9.60526315789474	9.975	10.25	8.66666666666667	2.36363636363636	8.025	9.02631578947368	7.83333333333333	6.08823529411765	4.78125	7.53125
7	28	4.68421052631579	7.69047619047619	9.21052631578947	10.0526315789474	9.76315789473684	8.80555555555556	4.68421052631579	8.23684210526316	9.52631578947368	7.52777777777778	6	4.82352941176471	7.63333333333333
7	29	4.71875	7.925	9.45	9.94736842105263	10.25	8.72222222222222	4.71875	7.975	9.23684210526316	7.69444444444444	5.76470588235294	4.84375	8.375
7	30	3.05	7.85714285714286	9.36842105263158	10.2368421052632	10.4166666666667	9.05555555555556	3.05	8.31578947368421	9.23684210526316	7.94444444444444	5.70588235294118	4.73529411764706	8.09375
7	31	5.9375	8.26190476190476	9.42105263157895	9.975	9.94444444444444	8.69444444444444	5.9375	8.25	8.97368421052632	7.41666666666667	5.5	4.79411764705882	8.14705882352941
7	32	5.5	7.95238095238095	9.3421052631579	9.6578947368421	9.58333333333333	8.76470588235294	5.5	8.36842105263158	9	7.5	5.70588235294118	4.625	8.5
7	33	3.21428571428571	7.45238095238095	9.125	9.81578947368421	10.0833333333333	9.16666666666667	3.21428571428571	8.23684210526316	8.78947368421053	7.69444444444444	5.55882352941176	4.61764705882353	8.53125
7	34	6.89285714285714	7.19047619047619	8.89473684210526	9.97058823529412	10.0789473684211	8.63888888888889	6.89285714285714	8.025	8.63157894736842	7.29411764705882	5.73529411764706	4.55882352941176	8.70588235294118
7	35	7.92857142857143	7.21428571428571	8.89473684210526	9.625	10.25	8.58333333333333	7.92857142857143	8.05263157894737	8.76315789473684	7.16666666666667	5.35294117647059	4.44117647058824	8.47058823529412
7	36	7.82142857142857	6.84090909090909	8.94736842105263	9.92105263157895	10.1388888888889	8.66666666666667	7.82142857142857	8.125	8.78947368421053	7.19444444444444	5.79411764705882	4.84375	8.44117647058824
7	37	7.82142857142857	6.78571428571429	9.02631578947368	9.5	10.0555555555556	8.91666666666667	7.82142857142857	8.18421052631579	8.76315789473684	6.88888888888889	5.58823529411765	4.76470588235294	8.55882352941176
7	38	4.47058823529412	7.04545454545455	8.5	9.6578947368421	10.1052631578947	8.33333333333333	4.47058823529412	8.1	8.86111111111111	6.66666666666667	5.47058823529412	4.6875	9.08823529411765
7	39	7.82142857142857	6.59523809523809	9.1	9.28947368421053	10.4166666666667	8.73529411764706	7.82142857142857	8.3421052631579	9.07894736842105	6.79411764705882	5.64705882352941	4.85294117647059	9.76470588235294
7	40	7.89285714285714	6.78571428571429	8.81578947368421	9.68421052631579	10.4166666666667	8.27777777777778	7.89285714285714	8.23684210526316	8.86842105263158	6.33333333333333	5.44117647058824	4.61764705882353	8.94117647058824
7	41	7.46875	7.11904761904762	8.97368421052632	9.55	10.3333333333333	8.30555555555556	7.46875	8.07894736842105	8.97368421052632	6.77777777777778	5.52941176470588	5.15625	8.85294117647059
7	42	7.9	7.09090909090909	8.92105263157895	9.5	10.3611111111111	8.05555555555556	7.9	8.2	8.89473684210526	6.52777777777778	5.58823529411765	4.91176470588235	8.69444444444444
7	43	7.39285714285714	6.69047619047619	8.725	8.94736842105263	10.4473684210526	7.88888888888889	7.39285714285714	8.05263157894737	9.13157894736842	6.61111111111111	5.44117647058824	4.55882352941176	8.58823529411765
7	44	7.8	6.68181818181818	9	9.42105263157895	10.1388888888889	7.77777777777778	7.8	7.84210526315789	8.97368421052632	6.64705882352941	5.64705882352941	4.59375	8.91666666666667
7	45	8.0625	6.28571428571429	8.47368421052632	9.23684210526316	10.6666666666667	7.5	8.0625	8.025	9.05263157894737	6.5	5.55882352941176	4.73529411764706	8.91666666666667
7	46	8.1	6	8.47368421052632	9.52631578947368	10.25	7.44444444444444	8.1	8.28947368421053	8.97368421052632	6.30555555555556	5.41176470588235	4.73529411764706	8.82352941176471
7	47	8.34375	5.90476190476191	8.97368421052632	9.71052631578947	10	7.05555555555556	8.34375	7.76315789473684	8.8421052631579	6.5	5.38235294117647	4.11764705882353	8.83333333333333
7	48	8.59375	4.46	8.825	9.42105263157895	10.3055555555556	7.19444444444444	8.59375	8.07894736842105	8.60526315789474	6.52777777777778	5.58823529411765	5.13636363636364	8.75
8	1	1	0	3.93333333333333	4	4.28571428571429	4.14285714285714	1	5.16666666666667	5.06666666666667	4.66666666666667	4	4.5	5.61538461538461
8	2	0	0	4	4	4.21428571428571	4.38461538461539	0	5.16666666666667	6.4	4.66666666666667	4	4.15384615384615	5.5
8	3	1	0	4	4.07142857142857	4.35714285714286	4.42857142857143	1	5.33333333333333	6.6	4.84615384615385	4	4.61538461538461	5.33333333333333
8	4	1	0	4	4	4.28571428571429	4.30769230769231	1	5.66666666666667	5.78571428571429	4.66666666666667	3.83333333333333	4.25	5.41666666666667
8	5	1	0	4	4	4.28571428571429	4.21428571428571	1	5.41666666666667	5.73333333333333	5.25	3.92307692307692	4.46153846153846	5.46153846153846
8	6	1	0	4	4.07142857142857	4.53846153846154	4.30769230769231	1	5.25	5.06666666666667	7.08333333333333	4	4.61538461538461	5.58333333333333
8	7	1	0	4	4	4.28571428571429	4.21428571428571	1	5.27272727272727	5.21428571428571	7.91666666666667	3.83333333333333	4.07692307692308	5.58333333333333
8	8	1	0	4	4.23076923076923	4.14285714285714	4.30769230769231	1	5.25	5.6	7.33333333333333	3.92307692307692	4.76923076923077	5.25
8	9	1	0	4	4	4.30769230769231	4.35714285714286	1	5.08333333333333	5.2	5.41666666666667	3.92307692307692	4.23076923076923	5.25
8	10	1	0	4	4	4.28571428571429	4.23076923076923	1	5.16666666666667	5.46666666666667	4.83333333333333	3.91666666666667	4.84615384615385	5.75
8	11	1	0	4	4	4.42857142857143	4.35714285714286	1	5	5.06666666666667	4.58333333333333	3.91666666666667	5	5.41666666666667
8	12	1	0	4	4	4.23076923076923	4.23076923076923	1	5.09090909090909	5.73333333333333	4.91666666666667	4.91666666666667	4.23076923076923	5.41666666666667
8	13	1	0	4	4.15384615384615	4.14285714285714	4.14285714285714	1	5	5.2	4.58333333333333	6.15384615384615	4.85714285714286	5.33333333333333
8	14	1	0	4	4	4.14285714285714	4.07142857142857	1	5	5.13333333333333	4.83333333333333	4.66666666666667	4.53846153846154	5.38461538461539
8	15	1	0	4	4	4.30769230769231	4.15384615384615	1	5	5	4.76923076923077	3.83333333333333	4.84615384615385	5.58333333333333
8	16	1	0	4	4	4.21428571428571	4.07142857142857	1	5	5.06666666666667	4.75	3.84615384615385	5.14285714285714	5.58333333333333
8	17	1	0	4	4.07692307692308	4.42857142857143	4.21428571428571	1	5	6.4	5	3.91666666666667	4.69230769230769	5.58333333333333
8	18	1	0	4	4.07692307692308	4.21428571428571	4.15384615384615	1	5	6.26666666666667	4.83333333333333	3.91666666666667	4.84615384615385	5.66666666666667
8	19	1	0	4	4.07142857142857	4.5	4.28571428571429	1	4.9	7.13333333333333	4.83333333333333	3.66666666666667	4.42857142857143	5.66666666666667
8	20	1	0	4	4	4.46153846153846	4	1	5	6.13333333333333	4.58333333333333	3.66666666666667	5	5.81818181818182
8	21	1	0	4	4.07142857142857	4.35714285714286	4	1	5	6.8125	4.66666666666667	3.84615384615385	4.53846153846154	5.83333333333333
8	22	1	0	4	4	4.42857142857143	4.07142857142857	1	5.1	6.33333333333333	4.75	3.66666666666667	5.07142857142857	6
8	23	1	0	4	4.07692307692308	4.35714285714286	4.28571428571429	1	5	6.06666666666667	4.5	3.91666666666667	5.15384615384615	5.91666666666667
8	24	1	0	4	4	4.23076923076923	4.15384615384615	1	5	7.07142857142857	4.66666666666667	3.58333333333333	5.21428571428571	6.08333333333333
8	25	1	0	4	4.14285714285714	4.21428571428571	4.07142857142857	1	4.9	6.85714285714286	4.41666666666667	3.76923076923077	5.28571428571429	6.07692307692308
8	26	1	0	4	4.07692307692308	4.14285714285714	4.07142857142857	1	5	5.14285714285714	4.16666666666667	3.92307692307692	5.30769230769231	5.91666666666667
8	27	1.04761904761905	0	3.92857142857143	4	4.28571428571429	4.15384615384615	1.04761904761905	5	6.64285714285714	4.25	3.91666666666667	5.21428571428571	6
8	28	1.14285714285714	0	4	4	4.14285714285714	4.07142857142857	1.14285714285714	5	5.71428571428571	4.16666666666667	3.83333333333333	5.35714285714286	6
8	29	1	0	3.85714285714286	4.07692307692308	4.21428571428571	4.15384615384615	1	5	5	4.54545454545455	3.58333333333333	5.30769230769231	6
8	30	1.26315789473684	0	4	4	4.15384615384615	4.21428571428571	1.26315789473684	4.90909090909091	5	4	3.58333333333333	5.35714285714286	5.92857142857143
8	31	1.14285714285714	0	3.46666666666667	4	4.71428571428571	4.57142857142857	1.14285714285714	5	5	4.33333333333333	3.58333333333333	5.42857142857143	6.15384615384615
8	32	1.2	0	3.64285714285714	4	4.42857142857143	4.61538461538461	1.2	4.90909090909091	5	4	3.53846153846154	5.69230769230769	5.71428571428571
8	33	1.8	0	3.5	4	4.73333333333333	4.64285714285714	1.8	5	5	4	3.5	5.57142857142857	6
8	34	2.08333333333333	0	3.28571428571429	4	4.35714285714286	4.85714285714286	2.08333333333333	5	5	4	3.66666666666667	5.78571428571429	6
8	35	2.77777777777778	0	3.14285714285714	4	4.21428571428571	4.69230769230769	2.77777777777778	5	5	4	3.58333333333333	5.69230769230769	5.92857142857143
8	36	2.7	0	3.21428571428571	4.13333333333333	4.15384615384615	4.71428571428571	2.7	5	5	4	3.27272727272727	5.57142857142857	5.33333333333333
8	37	1.85714285714286	0	3	4.25	4.21428571428571	4.46153846153846	1.85714285714286	5.18181818181818	5	4	3.58333333333333	5.61538461538461	5.4
8	38	2.9	0	3	4	4.07142857142857	4.71428571428571	2.9	5	5.08333333333333	4	3.66666666666667	5.69230769230769	4.64285714285714
8	39	3.3	0	3	4.13333333333333	4	4.78571428571429	3.3	5.09090909090909	7.84615384615385	4	3.75	5.71428571428571	4.53333333333333
8	40	3.33333333333333	0	3	4	4.21428571428571	4.57142857142857	3.33333333333333	4.90909090909091	7.53846153846154	4	3.91666666666667	5.76923076923077	4.66666666666667
8	41	3.18181818181818	0	2.73333333333333	4	4	4.71428571428571	3.18181818181818	4.90909090909091	7.83333333333333	4	3.5	5.76923076923077	4.53333333333333
8	42	4	0	1.375	3.85714285714286	4	4.78571428571429	4	5	7.41666666666667	4.16666666666667	3.66666666666667	5.53846153846154	4.875
8	43	4	0	1.28125	4	4.15384615384615	4.71428571428571	4	5	5.07692307692308	4.09090909090909	3.66666666666667	5.84615384615385	4.66666666666667
8	44	3.7	0	1.08108108108108	3.85714285714286	4	4.64285714285714	3.7	5	5	4.08333333333333	3.5	5.92857142857143	4
8	45	3.4	0	1.02564102564103	4	4	4.71428571428571	3.4	5	5	4	3.63636363636364	5.76923076923077	4.125
8	46	3.27272727272727	0	1.07142857142857	4	4.07142857142857	4.78571428571429	3.27272727272727	5	4.84615384615385	5.16666666666667	3.75	5.92307692307692	4.8
8	47	3.08333333333333	0	1	4	4	4.57142857142857	3.08333333333333	5	5.08333333333333	6.41666666666667	3.75	5.69230769230769	3.5625
8	48	3.5	0	1	4	4.14285714285714	4.78571428571429	3.5	5	4.91666666666667	5.25	3.41666666666667	5.92307692307692	3.53333333333333
9	1	0.66	3.91285714285714	4.64538461538462	5.61	5.3625	1.79666666666667	4.6475	3.60461538461539	5.02615384615385	4.41	2.76	2.64	1.79666666666667
9	2	0.86625	3.67714285714286	4.84	5.335	5.1975	1.52625	5.52	3.3825	4.7025	5.28	2.64	2.56666666666667	1.52625
9	3	0.806666666666667	3.65538461538462	4.95	5.39	5.5275	1.83333333333333	5.52	3.8775	4.895	4.68	2.706	2.574	1.83333333333333
9	4	0.87	3.90923076923077	5.06	5.225	5.3075	1.8975	5.64	4.2625	5.005	4.818	2.79	2.60333333333333	1.8975
9	5	1.02	3.80769230769231	4.95	5.8575	6.105	2.09	5.61	3.87	4.7025	4.818	2.7	2.56666666666667	2.09
9	6	0.99	3.73153846153846	4.62	5.79	5.88	2.05333333333333	5.52	3.85	4.8675	5.511	2.79	2.64	2.05333333333333
9	7	0.942857142857143	3.63	4.73	5.6375	5.7475	1.83333333333333	5.4175	4.18	4.89	5.22	2.706	2.67666666666667	1.83333333333333
9	8	1.01357142857143	3.52	4.64538461538462	5.4175	5.445	1.76	5.07	3.99	4.9225	4.5	2.673	2.71333333333333	1.76
9	9	0.99	3.4925	4.9775	5.79	4.455	1.72333333333333	5.17	3.85	4.895	4.719	2.73	2.64	1.72333333333333
9	10	1.078	3.73153846153846	4.73	6.2975	5.76	1.77375	5.28	3.6	4.785	4.8	2.607	2.60333333333333	1.77375
9	11	0.99	3.4925	4.64538461538462	5.79	5.6925	1.65	5.2525	3.9325	4.565	4.5925	3.234	2.67666666666667	1.65
9	12	0.99	3.52846153846154	4.8125	6.16	5.02615384615385	1.72333333333333	5.07	3.905	4.4275	4.56	2.673	2.53	1.72333333333333
9	13	0.892941176470588	3.3825	4.73	6.105	5.1975	1.79666666666667	4.3175	3.63	4.3725	3.99	3.762	2.71333333333333	1.79666666666667
9	14	0.99	3.63	4.67076923076923	6.9	5.52	1.79666666666667	4.23	3.4375	4.4275	3.81	3.39	2.78666666666667	1.79666666666667
9	15	0.99	3.19	4.5375	5.7475	5.39	1.7325	4.3725	3.9875	4.2075	3.93	3.234	2.75	1.7325
9	16	1.02882352941176	2.78142857142857	4.8675	6.05	5.5825	1.72333333333333	3.72	3.93	4.3725	3.729	2.904	2.78666666666667	1.72333333333333
9	17	1.02666666666667	1.93875	4.79769230769231	5.4	5.28	1.815	3.5475	3.9325	4.3175	3.84	2.7	2.7225	1.815
9	18	1.11375	2.21571428571429	5.39	5.225	5.5825	1.54	3.12	4.0975	4.51	4.02	2.64	2.64	1.54
9	19	1.65	2.53	4.92461538461539	5.9675	5.005	1.79666666666667	2.8875	4.32	4.6475	3.66	2.706	2.7225	1.79666666666667
9	20	1.98	2.079	4.56923076923077	5.85	4.98	1.60875	3.08	4.38	4.51	3.66	3.234	2.67666666666667	1.60875
9	21	2.013	2.43375	4.73	5.4725	5.72	1.72333333333333	2.97	4.2625	4.455	3.66	3.036	2.64	1.72333333333333
9	22	1.98	1.584	4.87384615384615	5.31	5.4175	1.79666666666667	3.52	4.32	4.785	3.66	2.772	2.68125	1.79666666666667
9	23	2.04	2.01666666666667	4.5925	5.39	5.1975	1.77375	3.63	4.455	4.65	3.432	2.7	2.64	1.77375
9	24	2.64	1.8975	4.89923076923077	5.34	5.17	2.01666666666667	3.08	4.56	4.62	3.51	2.739	2.60333333333333	2.01666666666667
9	25	2.56666666666667	1.056	4.8125	5.7475	5.1975	1.98	3.6575	4.4275	4.785	3.70333333333333	2.76	2.64	1.98
9	26	1.83333333333333	1.85625	4.31538461538462	5.225	5.6925	1.7325	4.08	4.41	4.62	3.69	2.673	2.56666666666667	1.7325
9	27	2.8875	1.32	4.565	5.49	6.1875	1.61333333333333	3.575	4.4275	4.565	3.597	2.673	2.64	1.61333333333333
9	28	2.82333333333333	1.485	4.79769230769231	5.39	5.1425	1.77375	4.2625	4.38	4.68	3.399	2.541	2.75	1.77375
9	29	3.3825	1.32	4.46769230769231	5.88	5.115	1.485	3.93	4.35	4.3725	3.59333333333333	2.64	2.5575	1.485
9	30	3.465	0.99	5.07692307692308	5.3625	5.5	2.18625	3.9875	4.4	4.44	3.48333333333333	2.607	2.67666666666667	2.18625
9	31	3.3	0.9625	4.82307692307692	5.665	5.52	2.26875	3.84	4.41	4.51	3.66	2.60333333333333	2.53	2.26875
9	32	3.17625	1.09153846153846	4.51846153846154	5.58	5.335	2.35125	3.3	4.51	4.41	3.729	2.706	2.49333333333333	2.35125
9	33	3.3825	1.155	4.62	6.4625	5.4725	2.23666666666667	3.52	4.35	4.3725	3.6	2.64	2.56666666666667	2.23666666666667
9	34	3.63	0.99	4.87384615384615	6.06	5.4175	2.5575	4.23	4.41	4.44	3.234	2.64	2.34666666666667	2.5575
9	35	3.44142857142857	0.96	5.38153846153846	6.105	4.9225	2.7225	3.5475	4.47	4.38	2.94	2.739	2.42	2.7225
9	36	3.465	0.916666666666667	5.75142857142857	5.9125	5.555	2.78666666666667	2.9975	4.47	4.125	2.805	2.673	2.31	2.78666666666667
9	37	3.72428571428571	0.953333333333333	5.55923076923077	6.3	5.5	3.3825	3.2175	4.455	4.29	3.168	2.673	2.12666666666667	3.3825
9	38	3.86571428571429	0.99	5.32714285714286	6.105	5.335	2.86	2.97	4.41	4.29	3.465	2.673	2.27333333333333	2.86
9	39	4.05428571428571	0.696666666666667	5.39785714285714	6.325	5.5275	3.22666666666667	3.5475	4.53	4.02	3.48	2.64	2.34666666666667	3.22666666666667
9	40	3.72428571428571	0.99	5.18571428571429	6.27	4.86	3.52	3.96	4.4825	4.23	3.498	2.64	2.2	3.52
9	41	3.86571428571429	0.99	4.95	6.5725	5.445	3.08	3.9	4.38	3.9875	3.3	2.343	1.98	3.08
9	42	4.4	0.715	5.02071428571429	7.26	5.6375	2.93333333333333	4.56	4.3725	4.08	3.3	2.56666666666667	1.76	2.93333333333333
9	43	4.235	0.61875	5.68071428571429	6.87	5.665	3.04333333333333	4.07	4.14	3.99	3.135	2.42	2.2275	3.04333333333333
9	44	3.355	0.605	4.785	7.205	5.0325	3.52	3.9325	4.3725	3.96	3.15	2.739	1.947	3.52
9	45	3.63	0.44	5.302	6.5725	5.79	3.3	4.71	4.44	3.905	2.871	2.64	1.72333333333333	3.3
9	46	4.015	0.66	5.588	6.93	6.0225	3.135	4.125	4.41	3.93	2.739	2.64	1.83333333333333	3.135
9	47	4.125	0.66	5.16214285714286	6.9575	5.5	3.63	4.235	4.4	3.99	2.85	2.64	2.2	3.63
9	48	4.345	0.612857142857143	4.80857142857143	6.325	5.7	3.3	4.14	4.38	3.72	2.904	2.772	2.56666666666667	3.3
10	1	1	4	4.5	5	2.88888888888889	3.08333333333333	5	3.88888888888889	4	4.33333333333333	3.11111111111111	3.92857142857143	3.08333333333333
10	2	1	3.91666666666667	4.64285714285714	5	2.85714285714286	2.5	5	4.16666666666667	4.38888888888889	4.05555555555556	3.11111111111111	3.92857142857143	2.5
10	3	1	3.78571428571429	4.5	5	3.125	3.5	5	4.625	4.8125	4.77777777777778	3.66666666666667	4.21428571428571	3.5
10	4	1.41666666666667	3.83333333333333	4.78571428571429	5	3.3125	3.9	5	4.9375	4.6875	4.88888888888889	3.375	4.1875	3.9
10	5	1.78571428571429	4	4.85714285714286	4.875	3.14285714285714	3.91666666666667	5	5	4.72222222222222	4.9375	3.5625	4	3.91666666666667
10	6	2	3.91666666666667	4.71428571428571	4.9375	2.9375	3.83333333333333	5	5	4.9375	5	2.9375	4.08333333333333	3.83333333333333
10	7	2	4	4.71428571428571	5	3.28571428571429	3.9	5	4.75	4.75	4.8125	3.375	4	3.9
10	8	2.33333333333333	3.83333333333333	4.58333333333333	5	2.9375	3.66666666666667	5	5	4.8125	4.8125	3.125	4.07142857142857	3.66666666666667
10	9	2.5	3.83333333333333	4.64285714285714	5	2.92857142857143	3.9	5	4.75	4.8125	4.9375	3.4375	4.14285714285714	3.9
10	10	3	4	4.57142857142857	5	3.0625	3.83333333333333	5	5	4.8125	4.88888888888889	3.75	4	3.83333333333333
10	11	3	3.92857142857143	4.42857142857143	5	3	3.9	5	5	4.6875	4.9375	3.5625	4.08333333333333	3.9
10	12	3	3.83333333333333	4.42857142857143	4.9375	2.71428571428571	3.83333333333333	5	4.64285714285714	4.8125	5	3.4375	4	3.83333333333333
10	13	3	3.1	4.42857142857143	4.9375	2.625	3.8	4.875	4.57142857142857	4.875	4.8125	3.5625	4	3.8
10	14	3	4	4.35714285714286	5	2.8125	3.66666666666667	5	4.5	4.5	4.875	4.14285714285714	4	3.66666666666667
10	15	3.14285714285714	3.66666666666667	4.5	5	3	3.8	5	4.28571428571429	4.75	4.9375	3.5	3.92857142857143	3.8
10	16	3.25	3.7	5	5	2.6875	3.66666666666667	5	4.71428571428571	4.8125	4.9375	3.375	4	3.66666666666667
10	17	3.21428571428571	3.58333333333333	5	5	2.64285714285714	3.7	5	4.5	5	4.75	3.35714285714286	4.16666666666667	3.7
10	18	3.5	3.6	4.85714285714286	4.92857142857143	2.625	3.7	4.85714285714286	4.42857142857143	4.875	4.875	3.3125	4.14285714285714	3.7
10	19	3.5	3.3	4.85714285714286	5	2.5	3.6	4.875	4.3125	4.8125	4.875	3.5625	4.08333333333333	3.6
10	20	3.42857142857143	3.41666666666667	4.85714285714286	4.875	2.8125	3.75	4.92857142857143	4.28571428571429	4.625	5	3.64285714285714	4.07142857142857	3.75
10	21	3.8125	2.9	4.78571428571429	5	2.42857142857143	3.6	4.9375	4.25	4.8125	4.875	3.3125	4	3.6
10	22	3.71428571428571	3.58333333333333	5	4.75	2.625	3.6	5	4	4.5	4.625	3.4375	4.07142857142857	3.6
10	23	4	3.5	4.78571428571429	5	2.5	3.6	5	4.1875	4.8125	4.875	3.42857142857143	3.83333333333333	3.6
10	24	3.5	3.16666666666667	4.78571428571429	4.92857142857143	2.42857142857143	3.7	4.64285714285714	4.4375	4.85714285714286	4.6875	3.4375	4	3.7
10	25	3.5	3.08333333333333	4.92857142857143	4.8125	2.625	3.6	4.8125	4	4.25	4.75	3.3125	4.07142857142857	3.6
10	26	3.625	3	4.85714285714286	4.92857142857143	2.5625	3.75	4.5	4.375	4.55555555555556	4.75	3.64285714285714	3.91666666666667	3.75
10	27	3.35714285714286	3	4.78571428571429	4.9375	2.57142857142857	3.7	4.42857142857143	4.125	4.57142857142857	4.625	3.5625	3.91666666666667	3.7
10	28	3.5625	3.33333333333333	4.71428571428571	4.9375	2.6875	3.5	4.3125	4.25	4.8125	4.8125	3.57142857142857	4	3.5
10	29	3.42857142857143	3.85714285714286	4.78571428571429	5	2.57142857142857	3.8	4.71428571428571	4.5	4.875	4.625	3.4375	4	3.8
10	30	3.5	3.85714285714286	4.64285714285714	4.9375	2.5625	3.83333333333333	4.6875	4.25	4.625	4.5	3.71428571428571	4	3.83333333333333
10	31	3.125	3.16666666666667	4.8125	5	2.5	3.7	4.3125	4.625	4.6875	4.375	3.4375	3.91666666666667	3.7
10	32	3	2.91666666666667	5	5	2.4375	3.4	4.64285714285714	4.5	4.6875	4.75	3.21428571428571	4	3.4
10	33	3.125	3	4.5	5.0625	2.42857142857143	3.75	4.5	4.57142857142857	4.875	4.625	3.07142857142857	4	3.75
10	34	3.14285714285714	2.66666666666667	4.71428571428571	5	2.375	3.6	4.875	4.5625	5	4.6875	3.4375	4	3.6
10	35	3.21428571428571	1.8	4.85714285714286	5.25	2.64285714285714	3.75	4.92857142857143	4.125	4.75	4.625	3.21428571428571	4	3.75
10	36	3	2.58333333333333	4.64285714285714	5.27777777777778	2.5625	3.8	4.5625	4.75	4.875	4.625	3.375	4	3.8
10	37	3	1.75	5	5.25	2.64285714285714	3.75	4.625	4.57142857142857	5	4.25	3.07142857142857	3.91666666666667	3.75
10	38	3	2.08333333333333	4.75	5.05555555555556	2.5	3.9	4.14285714285714	4.4375	4.6875	4.5	3.21428571428571	4	3.9
10	39	3	1.5	4.92857142857143	5.05555555555556	2.35714285714286	4	4.6875	4.625	4.9375	4.375	3.14285714285714	3.91666666666667	4
10	40	3	2.25	4.75	5.0625	2.21428571428571	3.91666666666667	4.375	4.35714285714286	4.77777777777778	4.75	3	3.85714285714286	3.91666666666667
10	41	3	1.75	5	5.05555555555556	2.64285714285714	4	4.57142857142857	4.25	4.9375	4.5625	2.85714285714286	3.58333333333333	4
10	42	3	0	5	4.94444444444444	2.375	4	4.5625	4.25	4.375	4.11111111111111	3.35714285714286	4	4
10	43	3	0	4.5	5	2.21428571428571	4	4.5	4.4375	4.625	4.4375	3.1875	4	4
10	44	2.71428571428571	0	5	5.05555555555556	2.42857142857143	4	4.75	4.4375	4.75	4.25	3.14285714285714	3.91666666666667	4
10	45	2.85714285714286	1	4.875	4.9375	2.5	4	4.42857142857143	4.42857142857143	4.625	4.0625	3.07142857142857	3.83333333333333	4
10	46	2.71428571428571	0	4.21428571428571	4.94444444444444	2.5	4	4.4375	4.5	4.5625	4.25	3	3.83333333333333	4
10	47	2.57142857142857	0	3.92857142857143	5	2.375	4.08333333333333	4.25	4.625	4.6875	4.125	3.07142857142857	3.75	4.08333333333333
10	48	2.57142857142857	0	4.5625	4.94444444444444	2.35714285714286	4	4.4375	4.28571428571429	4.75	4.375	2.78571428571429	3.83333333333333	4
11	1	1	3.95454545454545	6.5	6	5.2	4.25	1	5	5.33333333333333	5.08333333333333	5	1	2.22222222222222
11	2	0	5.38888888888889	6.61538461538461	6.07142857142857	5.57142857142857	4.45454545454545	0	5	5.1	5	5	1.18181818181818	3.14285714285714
11	3	1	6.1875	6.61538461538461	6	5.64285714285714	4.83333333333333	1	5	5.09090909090909	5	5	1	2.875
11	4	1	6.11111111111111	6.76923076923077	6	5.53333333333333	4.63636363636364	1	5	5.09090909090909	5	5	1	2.375
11	5	0	5.89473684210526	7.07692307692308	6	5.92857142857143	4.66666666666667	0	4.90909090909091	5	5	5	1.125	3
11	6	1	5.58823529411765	6.92307692307692	6	5.69230769230769	4.58333333333333	1	4.72727272727273	5.09090909090909	5	5	1.08333333333333	2.22222222222222
11	7	1	4.08695652173913	6.69230769230769	5.84615384615385	6.53846153846154	4.69230769230769	1	4.75	5	5	5	1.07692307692308	2.71428571428571
11	8	0	4.80952380952381	6.5	6	6.53846153846154	4.91666666666667	0	4.72727272727273	5	5	5	1	2.22222222222222
11	9	1	5.70588235294118	6.92307692307692	5.92307692307692	6.08333333333333	4.84615384615385	1	5	5	5	4.66666666666667	1	2.5
11	10	0	4.89473684210526	6.58333333333333	5.92307692307692	6	4.75	0	4.81818181818182	5	5	4.7	1	2.2
11	11	1	3.5	6.66666666666667	5.92307692307692	6.54545454545455	4.84615384615385	1	5.09090909090909	5	5	4.55555555555556	1	2.71428571428571
11	12	1	3.95833333333333	6.75	5.5	6.27272727272727	4.76923076923077	1	5	5	5	4.66666666666667	1.125	2.55555555555556
11	13	1	4.27272727272727	6.46153846153846	5.53846153846154	5.41666666666667	4.92307692307692	1	4.63636363636364	5	5.09090909090909	4.5	1	2.85714285714286
11	14	1	4	6.58333333333333	5.33333333333333	6.18181818181818	4.76923076923077	1	4.81818181818182	5	5	4.44444444444444	1	1.77777777777778
11	15	1	3.48148148148148	6.75	5.58333333333333	5.58333333333333	4.92307692307692	1	4.81818181818182	5	5	4.55555555555556	1	2
11	16	1	3.5	6.76923076923077	5.84615384615385	6.4	5	1	5.18181818181818	5	5	4.8	1.125	2.22222222222222
11	17	1	3.46153846153846	6.58333333333333	5.66666666666667	6.36363636363636	5	1	5	5	5	4.33333333333333	1	2.14285714285714
11	18	1	3.11111111111111	6.92307692307692	6	5.09090909090909	5	1	5.08333333333333	5	5	4.44444444444444	1.11111111111111	2.25
11	19	1	2.96666666666667	7.08333333333333	5.5	5	4.85714285714286	1	5	5	5	4.66666666666667	1	2
11	20	1	3.60714285714286	6.84615384615385	5.07692307692308	5.58333333333333	4.84615384615385	1	4.72727272727273	5	5	4.55555555555556	1.2	2.125
11	21	1	2.94117647058824	6.83333333333333	5.53846153846154	5.36363636363636	4.92307692307692	1	4.72727272727273	5	5	4.88888888888889	1.125	2.71428571428571
11	22	1	3.08333333333333	7.15384615384615	5.30769230769231	6.3	5	1	4.90909090909091	5	5	4.44444444444444	1.11111111111111	2
11	23	1	4.11111111111111	6.66666666666667	5.84615384615385	5.25	4.92307692307692	1	5.08333333333333	5	4.66666666666667	4.88888888888889	1	2.875
11	24	1	3.31428571428571	7.30769230769231	5.66666666666667	5.54545454545455	5	1	5	5	5	4.33333333333333	1.11111111111111	2.75
11	25	1	3.32432432432432	7	5.76923076923077	5.81818181818182	5	1	4.54545454545455	5	5	3.9	1.2	2.71428571428571
11	26	1	3.7	7.08333333333333	5.38461538461539	6.27272727272727	4.85714285714286	1	4.81818181818182	5	5	3.63636363636364	1.125	2.625
11	27	1	3.53125	7.15384615384615	6	5.33333333333333	5	1	5.09090909090909	5	5	2.73333333333333	1.09090909090909	3.71428571428571
11	28	1	3.73333333333333	6.83333333333333	5.61538461538461	5.16666666666667	4.84615384615385	1	4.90909090909091	5	5	2.92307692307692	1	4.125
11	29	1	3.28125	6.76923076923077	5.53846153846154	5.33333333333333	4.84615384615385	1	4.90909090909091	5	5	3.08333333333333	1.27272727272727	3.85714285714286
11	30	1	3.21212121212121	7.41666666666667	5.69230769230769	5.16666666666667	4.76923076923077	1	4.83333333333333	4.90909090909091	5	2.13333333333333	1.18181818181818	3.625
11	31	1	2.825	7.07692307692308	5.69230769230769	5.63636363636364	4.78571428571429	1	4.63636363636364	5	5	1.57894736842105	1.11111111111111	3.5
11	32	1	3.23529411764706	6.76923076923077	5.46153846153846	6.08333333333333	4.76923076923077	1	4.81818181818182	5	5	2.05882352941176	1.11111111111111	3.375
11	33	1	2.84615384615385	7.46153846153846	5.28571428571429	6.81818181818182	4.71428571428571	1	4.72727272727273	5	5	1.85	1.09090909090909	3.125
11	34	1	3.53333333333333	7.07692307692308	5.61538461538461	6.75	4.71428571428571	1	4.63636363636364	5	5	1.5	1.30769230769231	3
11	35	1	2.72972972972973	7	6	6.41666666666667	4.42857142857143	1	4.81818181818182	5	5	1.47368421052632	1.18181818181818	3.25
11	36	1	2.64102564102564	6.91666666666667	5.92857142857143	6.5	4.64285714285714	1	4.81818181818182	5	5	1.16	1.33333333333333	2.9
11	37	1	2.73529411764706	6.84615384615385	5.84615384615385	6.25	4.85714285714286	1	4.63636363636364	5	5	1.1304347826087	1.5	3.55555555555556
11	38	1	2.25	7.28571428571429	5.69230769230769	6.25	4.92857142857143	1	4.72727272727273	5	5	1.05263157894737	1.33333333333333	3.18181818181818
11	39	1	2.23076923076923	7.61538461538461	5.5	5.91666666666667	5	1	4.45454545454545	5	5	1.22727272727273	1.33333333333333	3.22222222222222
11	40	1	1.90697674418605	7.46153846153846	5.84615384615385	5.66666666666667	5	1	4.66666666666667	5	5	1.10526315789474	1.16666666666667	3.55555555555556
11	41	1	2.025	6.78571428571429	5.78571428571429	6	5	1	4.8	5	5	1.05	1.38461538461538	4
11	42	1	2.05555555555556	7	6.07692307692308	6	5	1	4.72727272727273	5	4.8	1.05	1.30769230769231	3.55555555555556
11	43	1	1.91428571428571	7.38461538461539	5.92857142857143	6	5	1	4.81818181818182	5	5	1.125	1.53333333333333	3.77777777777778
11	44	1	1.7027027027027	7.15384615384615	5.92307692307692	6.08333333333333	5	1	4.41666666666667	5	4.8	1.10526315789474	1.41666666666667	3.33333333333333
11	45	1	1.58333333333333	7.15384615384615	5.92857142857143	6.30769230769231	5	1	4.90909090909091	5	4.9	1	1.28571428571429	3.2
11	46	1	1.39393939393939	7.14285714285714	6.38461538461539	6.25	5.26666666666667	1	5	5	5.1	1.0625	1.23076923076923	3.375
11	47	1	1.41666666666667	7	6.21428571428571	6.46153846153846	5.78571428571429	1	4.90909090909091	4.90909090909091	5.1	1.07142857142857	1.38461538461538	3.2
11	48	1	1	7.07692307692308	6.15384615384615	6.25	5.21428571428571	1	4.9	5	5.1	1.11111111111111	1.33333333333333	3.625
12	1	6.83333333333333	9.14285714285714	8.35714285714286	7.69230769230769	8.69230769230769	9.38461538461539	6.83333333333333	6.38461538461539	9	9.83333333333333	8.91666666666667	7.42857142857143	7.46666666666667
12	2	6	9.28571428571429	8.71428571428571	7.07692307692308	8.92307692307692	9.92307692307692	6	7.08333333333333	9	9.91666666666667	8.45454545454546	7.57142857142857	5.69230769230769
12	3	6.45454545454545	8.71428571428571	8.92307692307692	8.15384615384615	9.08333333333333	9.92857142857143	6.45454545454545	7.33333333333333	9.46153846153846	9.41666666666667	7.66666666666667	7.69230769230769	6.07692307692308
12	4	6.41666666666667	7.85714285714286	8.71428571428571	8.07692307692308	8.61538461538461	10	6.41666666666667	6.38461538461539	9.53846153846154	9.83333333333333	8.36363636363636	7.28571428571429	5.53333333333333
12	5	6.41666666666667	9.07142857142857	8.85714285714286	7.76923076923077	8.58333333333333	9.92307692307692	6.41666666666667	6.75	9.23076923076923	9.5	8.75	7.92307692307692	5.93333333333333
12	6	6	8.5	8.84615384615385	8.38461538461539	9.07692307692308	9.61538461538461	6	6.5	8.92307692307692	9.45454545454546	8.72727272727273	8.23076923076923	6.07142857142857
12	7	6.36363636363636	8.84615384615385	7.92857142857143	7.92857142857143	8.75	9.46153846153846	6.36363636363636	6.66666666666667	8.61538461538461	9.91666666666667	9.16666666666667	8.16666666666667	5.92857142857143
12	8	6.33333333333333	8.78571428571429	8.28571428571429	8.38461538461539	8.53846153846154	9.92307692307692	6.33333333333333	6.58333333333333	8.76923076923077	9.72727272727273	9.18181818181818	6.92307692307692	5.26666666666667
12	9	5.75	9.5	8.76923076923077	8.23076923076923	8.5	9.76923076923077	5.75	7.16666666666667	8.30769230769231	9.66666666666667	9.33333333333333	6.75	5.25
12	10	5.36363636363636	8.5	8.71428571428571	8.38461538461539	8.69230769230769	9.84615384615385	5.36363636363636	6.66666666666667	9.30769230769231	9.83333333333333	8.63636363636364	6.92307692307692	5.93333333333333
12	11	6.66666666666667	9.30769230769231	8	7.92857142857143	8.58333333333333	9.69230769230769	6.66666666666667	6.69230769230769	9.07692307692308	9.72727272727273	8.27272727272727	7.07692307692308	5.0625
12	12	7.41666666666667	9.14285714285714	8.42857142857143	8.46153846153846	9	9.84615384615385	7.41666666666667	6.5	9.30769230769231	9.90909090909091	7.58333333333333	8.76923076923077	5.73333333333333
12	13	7.58333333333333	9.35714285714286	8.30769230769231	8	9.15384615384615	9.84615384615385	7.58333333333333	6.75	9.53846153846154	9.91666666666667	8.27272727272727	7.25	5.1875
12	14	6.63636363636364	8.61538461538461	8.35714285714286	8.42857142857143	9.08333333333333	9.91666666666667	6.63636363636364	6.5	9.46153846153846	9.66666666666667	8.72727272727273	6.54545454545455	4.82352941176471
12	15	5.75	9.28571428571429	9.07142857142857	8.84615384615385	8.25	9.53846153846154	5.75	7.75	9.76923076923077	9.72727272727273	7.90909090909091	5.66666666666667	5.57142857142857
12	16	6.91666666666667	9.38461538461539	8.61538461538461	8.30769230769231	8.75	9.61538461538461	6.91666666666667	7	9.38461538461539	9.83333333333333	8.58333333333333	6.33333333333333	4.38888888888889
12	17	6.63636363636364	9	8.5	8.69230769230769	9.23076923076923	9.53846153846154	6.63636363636364	7.16666666666667	9.58333333333333	9.72727272727273	8.90909090909091	4.90909090909091	4.36842105263158
12	18	6.33333333333333	9.15384615384615	8.76923076923077	8	9.33333333333333	10	6.33333333333333	6.46153846153846	9.76923076923077	9.66666666666667	9	6.66666666666667	3.70588235294118
12	19	5.75	9.42857142857143	9.07142857142857	8.61538461538461	8.75	9.30769230769231	5.75	6.75	9.61538461538461	9.75	9	6.63636363636364	4.4375
12	20	6.27272727272727	9.69230769230769	9.30769230769231	8.23076923076923	8.46153846153846	9.61538461538461	6.27272727272727	6.83333333333333	9.58333333333333	9.63636363636364	9.09090909090909	6.58333333333333	5
12	21	6.25	9.71428571428571	8.64285714285714	8.30769230769231	9	9.75	6.25	7.30769230769231	9.15384615384615	9.90909090909091	8.91666666666667	7.09090909090909	5.5
12	22	7.58333333333333	9.23076923076923	9.15384615384615	8.38461538461539	9	9.61538461538461	7.58333333333333	6.58333333333333	9.16666666666667	9.41666666666667	8.36363636363636	6.18181818181818	5.66666666666667
12	23	7.66666666666667	9.30769230769231	8.84615384615385	8.42857142857143	8.33333333333333	9.76923076923077	7.66666666666667	7.33333333333333	9.46153846153846	9.90909090909091	8.41666666666667	6.41666666666667	4.53846153846154
12	24	7.41666666666667	8.35714285714286	9.21428571428571	8.69230769230769	8.33333333333333	10.25	7.41666666666667	9	9.58333333333333	10	7.91666666666667	6.54545454545455	5.23076923076923
12	25	6.58333333333333	7.15384615384615	9.07692307692308	8.84615384615385	8.69230769230769	9.76923076923077	6.58333333333333	9.30769230769231	9.53846153846154	10	7.25	6	5.66666666666667
12	26	7.25	7.53846153846154	9.07142857142857	8.30769230769231	9	9.15384615384615	7.25	9.16666666666667	9.92307692307692	10	7.5	7	5.38461538461539
12	27	7.75	7.78571428571429	9.46153846153846	8.69230769230769	8.41666666666667	9.83333333333333	7.75	9.84615384615385	9.83333333333333	9.90909090909091	7.33333333333333	7.1	5.92307692307692
12	28	7.58333333333333	7.23076923076923	9	8.46153846153846	8.08333333333333	10	7.58333333333333	9.38461538461539	9.84615384615385	9.91666666666667	7.16666666666667	6.63636363636364	5.07692307692308
12	29	7.90909090909091	7.07692307692308	8.92857142857143	8.69230769230769	8.91666666666667	9.91666666666667	7.90909090909091	9.61538461538461	9.38461538461539	10	7.66666666666667	5.7	5
12	30	8	6.85714285714286	9	8.71428571428571	8.41666666666667	10	8	9.46153846153846	9.41666666666667	9.91666666666667	6.91666666666667	6.88888888888889	5.23076923076923
12	31	7.75	6.53846153846154	9.57142857142857	8.38461538461539	8.16666666666667	9.83333333333333	7.75	9.5	9.76923076923077	9.91666666666667	6.75	7.7	5.35714285714286
12	32	7.91666666666667	6.69230769230769	9.46153846153846	8.53846153846154	8.58333333333333	10	7.91666666666667	9.61538461538461	9.33333333333333	9.72727272727273	7.83333333333333	7.75	6.07142857142857
12	33	8	6.21428571428571	9.38461538461539	8.69230769230769	8.25	9.84615384615385	8	9.61538461538461	9.76923076923077	9.66666666666667	6.61538461538461	7.44444444444444	5.07142857142857
12	34	7.83333333333333	6	9.15384615384615	8.57142857142857	8.5	9.83333333333333	7.83333333333333	9.42857142857143	9.75	9.25	7.5	7.875	4.71428571428571
12	35	7.91666666666667	6.42857142857143	8.92857142857143	8.69230769230769	8.15384615384615	10	7.91666666666667	9.53846153846154	9.69230769230769	9.58333333333333	7.58333333333333	7.28571428571429	5.61538461538461
12	36	7.84615384615385	6.15384615384615	9.15384615384615	8.53846153846154	8.41666666666667	9.69230769230769	7.84615384615385	9.92307692307692	9.69230769230769	9.33333333333333	7.5	6.42857142857143	6
12	37	7.58333333333333	6.07692307692308	8.64285714285714	8.61538461538461	8.5	9.41666666666667	7.58333333333333	9.78571428571429	9.75	9.33333333333333	6.76923076923077	8.28571428571429	6.30769230769231
12	38	7.53846153846154	6.35714285714286	8.57142857142857	8.38461538461539	8.41666666666667	9.92307692307692	7.53846153846154	9.84615384615385	9.84615384615385	9.81818181818182	7.33333333333333	8.42857142857143	5.38461538461539
12	39	7.90909090909091	6.69230769230769	8.85714285714286	8.64285714285714	8	9.91666666666667	7.90909090909091	9.64285714285714	9.66666666666667	9.5	7.53846153846154	8.5	5.92307692307692
12	40	7.63636363636364	6.38461538461539	8.92857142857143	8.15384615384615	8.83333333333333	9.91666666666667	7.63636363636364	9.38461538461539	9.75	9.66666666666667	7.83333333333333	8.16666666666667	6.41666666666667
12	41	7.5	6.21428571428571	8.76923076923077	8.38461538461539	8.75	9.76923076923077	7.5	9.46153846153846	9.46153846153846	9.76923076923077	7.23076923076923	8.83333333333333	6.84615384615385
12	42	8	6.84615384615385	9.5	8.42857142857143	8.33333333333333	9.66666666666667	8	9.53846153846154	9.83333333333333	9.33333333333333	7	8	5.25
12	43	8	6	9.14285714285714	8.38461538461539	7.91666666666667	9.92307692307692	8	9.23076923076923	9.38461538461539	9.33333333333333	7.69230769230769	9.33333333333333	5.76923076923077
12	44	7.72727272727273	6.76923076923077	9	8.23076923076923	7.69230769230769	9.83333333333333	7.72727272727273	9.84615384615385	9.75	9.83333333333333	7.66666666666667	8.4	6.08333333333333
12	45	8	7.23076923076923	8.85714285714286	8.85714285714286	8.25	9.69230769230769	8	9.07692307692308	9.58333333333333	9.41666666666667	7.76923076923077	8	5
12	46	7.72727272727273	6.76923076923077	8.64285714285714	8.07692307692308	7.58333333333333	9.33333333333333	7.72727272727273	9.30769230769231	9.61538461538461	9.58333333333333	7.53846153846154	9.6	6.38461538461539
12	47	7.66666666666667	6.53846153846154	9	8.5	8.66666666666667	9.76923076923077	7.66666666666667	9.84615384615385	9.5	9.66666666666667	7.16666666666667	9	6.83333333333333
12	48	8	6.83333333333333	8.84615384615385	8.15384615384615	8.18181818181818	9.76923076923077	8	9.35714285714286	9.83333333333333	9.5	6.61538461538461	7.28571428571429	6.92307692307692
13	1	3.75	3	3.5	3.96428571428571	4	4.07692307692308	3.75	2.53846153846154	2.75	3.20833333333333	3.33333333333333	3.36363636363636	4.40909090909091
13	2	3.70833333333333	2.95833333333333	3.73076923076923	4	4.03571428571429	4.07692307692308	3.70833333333333	2.625	2.72727272727273	3.04545454545455	3.45454545454545	3.40909090909091	4.3
13	3	5.19230769230769	3	3.53846153846154	4.03846153846154	4	4.03846153846154	5.19230769230769	2.68181818181818	2.72727272727273	3.31818181818182	3.5	3.3	4.35
13	4	4.46153846153846	2.83333333333333	3.65384615384615	3.88461538461538	4	4.03846153846154	4.46153846153846	2.69230769230769	2.70833333333333	3.18181818181818	3.40909090909091	3.22727272727273	4.27272727272727
13	5	4.11538461538461	2.95833333333333	3.73076923076923	4	4	4.03846153846154	4.11538461538461	2.625	3.18181818181818	3	3.40909090909091	3.4	4.2
13	6	4.08333333333333	2.83333333333333	3.80769230769231	3.85714285714286	4	4.07692307692308	4.08333333333333	2.58333333333333	3.04545454545455	2.63636363636364	3.20833333333333	3.18181818181818	4.3
13	7	4.85	2.875	3.76923076923077	4	4	4.11538461538461	4.85	2.54166666666667	3.08333333333333	3	3.27272727272727	3.15	4.27272727272727
13	8	3.875	2.83333333333333	3.60714285714286	4.03846153846154	4	4.03846153846154	3.875	2.58333333333333	3.22727272727273	2.90909090909091	3.31818181818182	3.09090909090909	4.3
13	9	3.66666666666667	3	3.73076923076923	4.07692307692308	4	4.07692307692308	3.66666666666667	2.58333333333333	3.04545454545455	2.77272727272727	3.27272727272727	3.2	4.45
13	10	3.90909090909091	3.04166666666667	3.88461538461538	3.92307692307692	4	4	3.90909090909091	2.58333333333333	3	2.81818181818182	3.45454545454545	3.36363636363636	4.33333333333333
13	11	3.83333333333333	3	3.80769230769231	3.96153846153846	4	4	3.83333333333333	2.66666666666667	2.95454545454545	2.9	3.36363636363636	3.36363636363636	4.4
13	12	3.86363636363636	3.15384615384615	3.80769230769231	3.85714285714286	4	4	3.86363636363636	2.54166666666667	3.04545454545455	3.13636363636364	3.40909090909091	3.2	4.4
13	13	3.79166666666667	3.04545454545455	3.89285714285714	4.03846153846154	4	4	3.79166666666667	2.54166666666667	3.04545454545455	3.04545454545455	3.40909090909091	3.04545454545455	4.3
13	14	3.63636363636364	2.95833333333333	3.69230769230769	4	4	4	3.63636363636364	2.58333333333333	3.33333333333333	2.9	3.27272727272727	2.90909090909091	4.35
13	15	4.46153846153846	3	3.57692307692308	3.80769230769231	4	4	4.46153846153846	2.57692307692308	3.13636363636364	3.09090909090909	3.40909090909091	3.2	4.5
13	16	4.46153846153846	3	3.5	4.03846153846154	4	4	4.46153846153846	2.54166666666667	2.95454545454545	3.27272727272727	3.375	3.13636363636364	4.7
13	17	4.08333333333333	3	3.57142857142857	3.89285714285714	4	4	4.08333333333333	2.625	2.70833333333333	3	3.45454545454545	2.86363636363636	4.9
13	18	4.03846153846154	2.875	3.53846153846154	3.96153846153846	4	4	4.03846153846154	2.58333333333333	3.09090909090909	3	3.18181818181818	2.3	5.05
13	19	4	2.79166666666667	3.73076923076923	3.80769230769231	4	4	4	2.625	3.04545454545455	2.68181818181818	3.22727272727273	0.833333333333333	4.81818181818182
13	20	4	2.95454545454545	3.78571428571429	4.03846153846154	4	4	4	2.54166666666667	3.22727272727273	3.15	3.36363636363636	2.86363636363636	4.9
13	21	3.76923076923077	2.875	3.65384615384615	3.96428571428571	4	3.96153846153846	3.76923076923077	2.54166666666667	3.18181818181818	3.09090909090909	3.31818181818182	3.2	5.18181818181818
13	22	3.96153846153846	2.90909090909091	3.61538461538462	3.84615384615385	4	4	3.96153846153846	2.58333333333333	3.18181818181818	3.22727272727273	3.40909090909091	3.36363636363636	5.15
13	23	4	1.75	3.67857142857143	3.73076923076923	4	4	4	2.54166666666667	3.31818181818182	3.09090909090909	3.36363636363636	3.09090909090909	5.27272727272727
13	24	4	1	3.96153846153846	4.07692307692308	4	4	4	2.66666666666667	3.18181818181818	2.95454545454545	3.36363636363636	2.72727272727273	5.35
13	25	4.125	1.5	3.96428571428571	3.96153846153846	4.03571428571429	3.92857142857143	4.125	2.58333333333333	3.13636363636364	3.04545454545455	3.45454545454545	1.7	5.27272727272727
13	26	3.91666666666667	1.27272727272727	4.07692307692308	3.84615384615385	4.03846153846154	3.96153846153846	3.91666666666667	2.625	3.13636363636364	2.95454545454545	3.5	0.666666666666667	5.09090909090909
13	27	3.83333333333333	1.40909090909091	3.82142857142857	3.73076923076923	4	3.92307692307692	3.83333333333333	2.68181818181818	3.09090909090909	2.86363636363636	3.27272727272727	0.55	5.36363636363636
13	28	3.91666666666667	1.5	2.5	3.78571428571429	4	3.92307692307692	3.91666666666667	2.58333333333333	3.04545454545455	2.72727272727273	3	3	5.13636363636364
13	29	3.83333333333333	1.05555555555556	0	3.88461538461538	4	3.92307692307692	3.83333333333333	2.625	2.90909090909091	2.55	3.15	3.85	5.31818181818182
13	30	3.79166666666667	0.95	0	3.88461538461538	4	4	3.79166666666667	2.66666666666667	2.9	2.63636363636364	2.95454545454545	3.45454545454545	5.18181818181818
13	31	3.77272727272727	0.785714285714286	0	3.57692307692308	4	4	3.77272727272727	2.70833333333333	2.77272727272727	2.54545454545455	3.18181818181818	3.18181818181818	5.40909090909091
13	32	3.95833333333333	0.95	0.5	3.61538461538462	4	3.92307692307692	3.95833333333333	2.66666666666667	3.09090909090909	2.63636363636364	3.27272727272727	2.90909090909091	5.22727272727273
13	33	4	0.9	0.75	3.76923076923077	4	4	4	2.72727272727273	2.81818181818182	2.40909090909091	3.13636363636364	2.9	5.18181818181818
13	34	3.91666666666667	0.75	0.5	3.125	4	3.92307692307692	3.91666666666667	2.625	2.81818181818182	2.45454545454545	3.22727272727273	2.63636363636364	5.09090909090909
13	35	3.77272727272727	0.833333333333333	0.75	0	4	4	3.77272727272727	2.625	2.63636363636364	2.81818181818182	2.16666666666667	2.65	5.22727272727273
13	36	3.75	0.7	1	0	4	4.03846153846154	3.75	2.72727272727273	2.81818181818182	2.86363636363636	2.5	2.4	5.125
13	37	3.54545454545455	0.5	0.833333333333333	0.5	4	4	3.54545454545455	2.66666666666667	2.59090909090909	2.59090909090909	3.33333333333333	3.45	5.13636363636364
13	38	3.625	0.5	1.25	0.5	4	4	3.625	2.77272727272727	2.63636363636364	2.68181818181818	3.45454545454545	3.63636363636364	5.04545454545455
13	39	3.40909090909091	0.8	1.28571428571429	0.8	4.07692307692308	4	3.40909090909091	2.66666666666667	2.86363636363636	3.04545454545455	3.40909090909091	3.54545454545455	5.125
13	40	3.5	0.75	1.6875	2.63636363636364	4	4.03846153846154	3.5	2.63636363636364	3.31818181818182	2.63636363636364	3.18181818181818	3.4	4.59090909090909
13	41	3.5	0.75	2	3.29166666666667	4	4	3.5	2.66666666666667	3.5	2.63636363636364	1.375	3.27272727272727	4.66666666666667
13	42	3.5	0	1.3125	3.20833333333333	4	4	3.5	2.63636363636364	3.04545454545455	2.81818181818182	3	3.15	4.5
13	43	3.45454545454545	0.5	1.07142857142857	3.53846153846154	4	4	3.45454545454545	2.66666666666667	3.22727272727273	2.72727272727273	3.27272727272727	3.6	4.45833333333333
13	44	3.5	0	1.90909090909091	3.58333333333333	4	4	3.5	2.63636363636364	2.72727272727273	2.68181818181818	3.40909090909091	3.2	4.54545454545455
13	45	3.5	0.5	2	3.625	4.07692307692308	4	3.5	2.66666666666667	2.63636363636364	2.86363636363636	3.18181818181818	3.45454545454545	4.66666666666667
13	46	3.5	0.5	1.58333333333333	3.5	4.11538461538461	4	3.5	2.72727272727273	2.58333333333333	2.72727272727273	3.125	3.25	4.40909090909091
13	47	3.33333333333333	0.5	1.1	3.41666666666667	4	4.03846153846154	3.33333333333333	2.63636363636364	2.63636363636364	2.81818181818182	2.63636363636364	3.2	4.45833333333333
13	48	3.31818181818182	0.5	1.3125	3.76923076923077	4.07692307692308	4	3.31818181818182	2.625	2.68181818181818	2.72727272727273	3.04545454545455	2.75	4.36363636363636
14	1	0.5	4.97368421052632	6.78125	7.2	6.75	7.30769230769231	8.07142857142857	7.96428571428571	8.03571428571429	8.39285714285714	8.42307692307692	7.15384615384615	7.30769230769231
14	2	0	5.19444444444444	6.59375	6.66666666666667	6.57692307692308	6.875	7.92307692307692	7.76923076923077	8.10714285714286	8.53846153846154	8.04166666666667	7.15384615384615	6.875
14	3	0	5.02941176470588	6.76666666666667	6.93333333333333	6.96428571428571	6.83333333333333	7.65384615384615	7.57692307692308	8.53846153846154	8.46153846153846	8.69230769230769	6.80769230769231	6.83333333333333
14	4	0.5	5.08333333333333	6.55882352941176	6.96666666666667	6.96428571428571	6.96153846153846	7.84615384615385	7.5	8.15384615384615	8.88461538461539	8.95833333333333	7.30769230769231	6.96153846153846
14	5	0	4.85294117647059	6.875	7.03333333333333	7.03571428571429	7.25	7.71428571428571	7.5	7.84615384615385	8.69230769230769	8.61538461538461	7.34615384615385	7.25
14	6	0.5	5	6.63333333333333	6.6	7.03571428571429	7.04166666666667	7.80769230769231	7.71428571428571	8.21428571428571	8.53846153846154	9.375	7.34615384615385	7.04166666666667
14	7	0.5	5.02941176470588	6.5	7.03571428571429	7.10714285714286	7	7.57692307692308	7.71428571428571	7.88461538461539	8.65384615384615	9	7.73076923076923	7
14	8	0	5	6.5	6.66666666666667	7.07142857142857	6.54166666666667	7.69230769230769	7.67857142857143	8.38461538461539	8.46153846153846	8.875	7.5	6.54166666666667
14	9	0.5	5.05882352941176	6.6	6.7	6.92857142857143	7	7.92857142857143	7.65384615384615	8.03571428571429	8.34615384615385	8.5	7.04166666666667	7
14	10	0.5	4.85294117647059	6.90625	6.5	7	6.95833333333333	7.57692307692308	7.71428571428571	8.03846153846154	8.80769230769231	9.125	6.92307692307692	6.95833333333333
14	11	0.5	4.85294117647059	6.73333333333333	6.57142857142857	6.93333333333333	6.83333333333333	8.07692307692308	7.67857142857143	8.03846153846154	8.73076923076923	8.84615384615385	7.15384615384615	6.83333333333333
14	12	1	5.05882352941176	6.6875	6.86666666666667	6.92857142857143	6.75	7.73076923076923	7.75	7.82142857142857	8.96153846153846	8.66666666666667	7.16666666666667	6.75
14	13	0.5	5.05882352941176	6.8125	6.66666666666667	7.25	6.69230769230769	7.92857142857143	7.89285714285714	7.80769230769231	8.96153846153846	8.34615384615385	7.23076923076923	6.69230769230769
14	14	0.666666666666667	4.73529411764706	6.76666666666667	6.53571428571429	6.93333333333333	6.70833333333333	7.84615384615385	7.80769230769231	8.07692307692308	8.76923076923077	9.08333333333333	7.30769230769231	6.70833333333333
14	15	0.5	4.6875	6.5625	7.14285714285714	7.57142857142857	6.54166666666667	8.23076923076923	7.67857142857143	7.57692307692308	9.42857142857143	9.15384615384615	7.26923076923077	6.54166666666667
14	16	0	4.79411764705882	6.5	6.96666666666667	7.03571428571429	6.5	8.23076923076923	7.84615384615385	7.82142857142857	8.57692307692308	8.92307692307692	6.95833333333333	6.5
14	17	0.5	4.91176470588235	6.26666666666667	6.61538461538461	7.03571428571429	6.91666666666667	8.38461538461539	7.73076923076923	8.34615384615385	9.11538461538461	8.66666666666667	7.23076923076923	6.91666666666667
14	18	0.5	4.875	6.6875	6.92857142857143	7.15384615384615	6.70833333333333	7.76923076923077	7.80769230769231	8.26923076923077	8.61538461538461	8.16666666666667	7.23076923076923	6.70833333333333
14	19	0	4.61764705882353	6.6875	6.89285714285714	7.32142857142857	6.73076923076923	8.15384615384615	7.89285714285714	8.42307692307692	8.11538461538461	8.54166666666667	6.875	6.73076923076923
14	20	0.5	4.70588235294118	6.76666666666667	6.85714285714286	7.25	7.04166666666667	7.84615384615385	7.76923076923077	8.42307692307692	8.61538461538461	8.84615384615385	6.96153846153846	7.04166666666667
14	21	0.5	4.53125	6.625	6.88461538461539	7.03571428571429	6.95833333333333	7.76923076923077	7.88461538461539	7.61538461538461	8.34615384615385	8.45833333333333	7.125	6.95833333333333
14	22	0.5	4.85294117647059	6.76666666666667	6.60714285714286	7.03571428571429	6.73076923076923	7.65384615384615	7.75	8.07692307692308	8.38461538461539	8.58333333333333	6.73076923076923	6.73076923076923
14	23	0.75	4.41176470588235	6.75	6.85714285714286	7	6.625	7.96153846153846	8.15384615384615	8.26923076923077	8.96153846153846	8.375	7	6.625
14	24	0.5	4.34375	6.6	6.57142857142857	7.03571428571429	6.83333333333333	7.73076923076923	8.07142857142857	8.30769230769231	8.69230769230769	8.5	7.03846153846154	6.83333333333333
14	25	0.75	4.41176470588235	6.8125	6.76666666666667	6.78571428571429	6.70833333333333	7.84615384615385	7.61538461538461	8.14285714285714	8.69230769230769	8.70833333333333	7.25	6.70833333333333
14	26	0.5	4.53125	6.46666666666667	6.75	7.32142857142857	6.73076923076923	7.73076923076923	7.65384615384615	8.23076923076923	8.69230769230769	8.38461538461539	7.57692307692308	6.73076923076923
14	27	0.5	4.26470588235294	6.6875	6.75	7.10714285714286	6.75	7.88461538461539	8.03571428571429	8.30769230769231	8.88461538461539	8.58333333333333	7.11538461538461	6.75
14	28	0.625	4.3125	6.34375	6.82142857142857	6.89285714285714	6.79166666666667	7.76923076923077	7.57692307692308	8.65384615384615	8.76923076923077	8.46153846153846	7.38461538461539	6.79166666666667
14	29	0.5	4.23529411764706	6.5	6.6	6.85714285714286	7.03846153846154	7.58333333333333	8.15384615384615	8.42307692307692	8.69230769230769	8.16666666666667	7.20833333333333	7.03846153846154
14	30	0.5	4.1875	6.8125	6.82142857142857	7.10714285714286	6.83333333333333	7.39285714285714	8.07142857142857	8.35714285714286	8.69230769230769	8.45833333333333	7	6.83333333333333
14	31	0.5	4.09375	6.28125	7.03333333333333	6.96153846153846	7	7.875	8.15384615384615	8.30769230769231	8.76923076923077	8.15384615384615	7.41666666666667	7
14	32	0.5	4.0625	6.4	6.8	7.28571428571429	6.625	7.61538461538461	7.73076923076923	8.88461538461539	8.80769230769231	8.5	7.11538461538461	6.625
14	33	0.5	4.17647058823529	6.23529411764706	6.6	7.07692307692308	6.84615384615385	7.65384615384615	7.96153846153846	9.30769230769231	8.88461538461539	8.34615384615385	7	6.84615384615385
14	34	0.555555555555556	4.21875	6.59375	6.71428571428571	7.28571428571429	6.5	7.53846153846154	7.96428571428571	8.96153846153846	8.84615384615385	8.57692307692308	7.08333333333333	6.5
14	35	0.5	4.25	6.3125	6.93333333333333	7.14285714285714	6.76923076923077	7.80769230769231	8	8.38461538461539	8.54166666666667	8.5	7.19230769230769	6.76923076923077
14	36	0.5	4.0625	6.28125	6.73333333333333	7.03846153846154	6.75	7.73076923076923	8	8.10714285714286	8.42307692307692	8.33333333333333	7.5	6.75
14	37	0.5	4.09375	6.375	6.46666666666667	7.57142857142857	6.57692307692308	7.96153846153846	8.23076923076923	8.69230769230769	8.07692307692308	8.15384615384615	7.34615384615385	6.57692307692308
14	38	0.5	3.96875	6.25	6.4	7.10714285714286	7.08333333333333	8.08333333333333	8.11538461538461	8.88461538461539	8.26923076923077	8.79166666666667	7.375	7.08333333333333
14	39	0.5	4.1	6.5	6.8	7.07142857142857	6.96153846153846	7.69230769230769	7.96153846153846	8.88461538461539	9.07692307692308	8.70833333333333	7.23076923076923	6.96153846153846
14	40	0.5	3.7	6.4375	6.73333333333333	7.07142857142857	7.08333333333333	7.73076923076923	7.76923076923077	8.73076923076923	8.53846153846154	8.15384615384615	7.11538461538461	7.08333333333333
14	41	0.5	3.90625	6.36111111111111	6.86666666666667	7.17857142857143	7	7.76923076923077	8.11538461538461	8.53846153846154	8.54166666666667	8.25	7.25	7
14	42	0.5	3.5	6.61111111111111	6.7	7.15384615384615	6.84615384615385	7.76923076923077	8.15384615384615	8.39285714285714	8.53846153846154	8.26923076923077	7.15384615384615	6.84615384615385
14	43	0.5	3.5	6.22222222222222	7.21875	7.25	7.11538461538461	7.83333333333333	8.46153846153846	8.5	8.57692307692308	8.53846153846154	7.16666666666667	7.11538461538461
14	44	0.533333333333333	3.53333333333333	6	7.03333333333333	7.25	6.875	8	8.07692307692308	8.26923076923077	8.42307692307692	8.5	7	6.875
14	45	0.5	3.46666666666667	6.08333333333333	6.7	7.14285714285714	6.88461538461539	7.69230769230769	8.19230769230769	8.5	8.5	8.57692307692308	6.88461538461539	6.88461538461539
14	46	0.5	3.39285714285714	6.41666666666667	7.16666666666667	7.35714285714286	7	7.73076923076923	8.30769230769231	8.15384615384615	8.23076923076923	8.16666666666667	7.04166666666667	7
14	47	0.607142857142857	3.23333333333333	6.05555555555556	6.86666666666667	7.07142857142857	6.57692307692308	7.73076923076923	8.26923076923077	8.38461538461539	8.69230769230769	8.11538461538461	7.20833333333333	6.57692307692308
14	48	0.53125	3.25	6.08333333333333	6.93333333333333	7.25	6.625	7.53846153846154	8.23076923076923	9.03846153846154	8.34615384615385	8.16666666666667	6.76923076923077	6.625
15	1	1.94166666666667	2.80882352941176	2.99107142857143	2.875	2.59821428571429	2.66964285714286	1.94166666666667	3.14285714285714	2.93333333333333	2.99107142857143	3.24107142857143	3.14423076923077	3.25
15	2	1.73214285714286	3	3.10714285714286	2.75	2.425	2.57142857142857	1.73214285714286	3.1875	3.04464285714286	2.94642857142857	3.35576923076923	2.85416666666667	3.125
15	3	1.9	2.6328125	3.07142857142857	2.82692307692308	2.63392857142857	2.5	1.9	3.14285714285714	3.17857142857143	3	3.50961538461538	3.11458333333333	3.01136363636364
15	4	1.58928571428571	2.31666666666667	3.03846153846154	2.95535714285714	2.59615384615385	2.51785714285714	1.58928571428571	3.14285714285714	3.17857142857143	2.92857142857143	3.05769230769231	3.02083333333333	3.30681818181818
15	5	1.8125	2.725	3.125	2.76923076923077	2.69642857142857	2.51923076923077	1.8125	3.23214285714286	3.125	2.98076923076923	3.32692307692308	3.125	3.33333333333333
15	6	1.70535714285714	2.8515625	2.94230769230769	2.82692307692308	2.66071428571429	2.59821428571429	1.70535714285714	3.23214285714286	3.19642857142857	3.03571428571429	3.43269230769231	3.01041666666667	3.47727272727273
15	7	1.98214285714286	2.6953125	2.875	2.75	2.78846153846154	2.63461538461538	1.98214285714286	2.96153846153846	3.00892857142857	3.04464285714286	3.75961538461538	2.95454545454545	3.19318181818182
15	8	1.85714285714286	2.575	3.14423076923077	2.58653846153846	2.50961538461538	2.58928571428571	1.85714285714286	3.125	3.04464285714286	2.94642857142857	3.70192307692308	3.15384615384615	3.3125
15	9	1.78571428571429	2.7890625	2.99107142857143	2.71153846153846	2.75	2.61538461538462	1.78571428571429	3.19642857142857	3.09615384615385	3.02678571428571	3.50961538461538	3.05208333333333	3.44318181818182
15	10	1.72321428571429	2.7734375	2.85576923076923	2.79807692307692	2.52083333333333	2.63392857142857	1.72321428571429	3.20535714285714	3.125	2.93269230769231	3.60576923076923	3.23863636363636	3.725
15	11	1.78571428571429	2.734375	3.00892857142857	2.83653846153846	2.71153846153846	2.47115384615385	1.78571428571429	3.19642857142857	3.14285714285714	2.86607142857143	3.36538461538462	3.02083333333333	3.89772727272727
15	12	1.77884615384615	2.73333333333333	3.08653846153846	2.75961538461538	2.74038461538462	2.55357142857143	1.77884615384615	3.25892857142857	2.99107142857143	3.24107142857143	3.70192307692308	3.34375	3.9375
15	13	2.07142857142857	2.859375	2.9375	2.71153846153846	2.73214285714286	2.54807692307692	2.07142857142857	3.16071428571429	3.05769230769231	3.04807692307692	3.61538461538462	3.17708333333333	3.825
15	14	1.74107142857143	2.58333333333333	3.01785714285714	2.69642857142857	2.68269230769231	2.54464285714286	1.74107142857143	3.21428571428571	3.25	2.85714285714286	3.38461538461538	3.01041666666667	3.82954545454545
15	15	1.83928571428571	2.475	2.80769230769231	2.65384615384615	2.53571428571429	2.44230769230769	1.83928571428571	3.07692307692308	2.83035714285714	3.01785714285714	3.57692307692308	3.05208333333333	3.73863636363636
15	16	1.85	2.796875	3.00892857142857	2.89423076923077	2.56730769230769	2.51785714285714	1.85	3.1875	2.91964285714286	2.90384615384615	3.41346153846154	3.07291666666667	4.0625
15	17	2.23214285714286	2.54166666666667	2.91346153846154	2.75961538461538	2.55357142857143	2.53846153846154	2.23214285714286	3.23214285714286	3.03571428571429	3.03571428571429	3.58653846153846	3.08333333333333	3.68181818181818
15	18	2.29166666666667	2.4296875	2.71428571428571	2.61538461538462	2.51785714285714	2.49107142857143	2.29166666666667	3.24107142857143	2.94642857142857	3.20192307692308	3.86538461538462	3.10227272727273	3.90625
15	19	2.3	2.59166666666667	2.70192307692308	2.83653846153846	2.66346153846154	2.60714285714286	2.3	3.1875	3.27884615384615	3.15178571428571	3.75	2.97916666666667	3.76136363636364
15	20	2.04166666666667	2.48333333333333	2.625	2.97115384615385	2.66071428571429	2.57142857142857	2.04166666666667	3.19230769230769	3.16071428571429	3.03846153846154	3.5	2.8125	3.79807692307692
15	21	2.15	2.546875	2.98214285714286	2.96153846153846	2.61538461538462	2.38461538461538	2.15	2.92857142857143	3.03571428571429	2.875	3.73076923076923	3.11458333333333	3.60416666666667
15	22	2.23333333333333	2.45833333333333	3	2.80769230769231	2.64285714285714	2.50892857142857	2.23333333333333	3.10714285714286	3.07692307692308	3.02678571428571	3.5625	2.94791666666667	3.71875
15	23	2.375	2.8125	2.85576923076923	2.73076923076923	2.75961538461538	2.65178571428571	2.375	3.16071428571429	3	2.98076923076923	3.64423076923077	3.11458333333333	3.70833333333333
15	24	2.23333333333333	2.546875	3.08035714285714	2.91346153846154	2.50892857142857	2.57692307692308	2.23333333333333	3.24107142857143	3.10714285714286	2.83928571428571	3.47115384615385	2.80681818181818	3.625
15	25	2.26785714285714	2.4453125	3.04464285714286	2.99107142857143	2.65178571428571	2.48214285714286	2.26785714285714	3.24038461538462	2.96428571428571	2.95192307692308	3.34615384615385	2.88541666666667	3.83653846153846
15	26	2.23333333333333	2.425	3.13392857142857	2.72115384615385	2.56730769230769	2.5625	2.23333333333333	3.0625	3.14423076923077	3.01785714285714	3.51923076923077	3.31818181818182	3.91346153846154
15	27	2.42857142857143	2.703125	3.24166666666667	2.875	2.57142857142857	2.625	2.42857142857143	3.14285714285714	3.22321428571429	3.06730769230769	3.47115384615385	2.88541666666667	3.89423076923077
15	28	2.21666666666667	2.3828125	3.23214285714286	2.97115384615385	2.73076923076923	2.54464285714286	2.21666666666667	3.23214285714286	3.01923076923077	2.89285714285714	3.49038461538462	2.84375	3.88461538461538
15	29	2.40178571428571	2.5703125	3.21666666666667	3	2.60714285714286	2.55357142857143	2.40178571428571	3.22115384615385	3.04464285714286	3.03846153846154	3.51923076923077	3.09090909090909	3.65384615384615
15	30	2.36666666666667	2.50735294117647	2.91964285714286	2.92857142857143	2.70192307692308	2.71153846153846	2.36666666666667	3.15178571428571	3.14285714285714	3.07142857142857	3.46153846153846	3.01041666666667	3.63541666666667
15	31	2.41071428571429	2.34166666666667	2.83035714285714	3.1875	2.55357142857143	2.55357142857143	2.41071428571429	3.125	3.17307692307692	3.24038461538462	3.56730769230769	3.14583333333333	3.64285714285714
15	32	2.40178571428571	2.19117647058824	2.75	2.98333333333333	2.60576923076923	2.66071428571429	2.40178571428571	3.21428571428571	3.15178571428571	3.00961538461538	3.625	2.96875	3.85576923076923
15	33	2.60833333333333	2.171875	2.83333333333333	2.92857142857143	2.66964285714286	2.59615384615385	2.60833333333333	3.09821428571429	3.13461538461538	3.09821428571429	3.36538461538462	2.97727272727273	3.69230769230769
15	34	2.45535714285714	2.22058823529412	2.83035714285714	3.0625	2.63461538461538	2.57142857142857	2.45535714285714	3.08928571428571	3.01785714285714	3.05769230769231	3.47115384615385	3.14583333333333	3.61538461538462
15	35	2.59821428571429	2.08088235294118	2.69166666666667	3.00892857142857	2.76923076923077	2.44642857142857	2.59821428571429	3.44230769230769	3.06730769230769	3.23076923076923	3.46153846153846	3.20454545454545	3.8125
15	36	2.425	2.05147058823529	2.71428571428571	2.95	2.625	2.70192307692308	2.425	2.96428571428571	3.0625	3.03846153846154	3.33653846153846	3.14583333333333	3.80769230769231
15	37	2.89285714285714	2.16911764705882	2.42857142857143	3.01785714285714	2.65384615384615	2.59821428571429	2.89285714285714	3	3.14285714285714	3.14285714285714	3.53846153846154	3.01136363636364	3.60576923076923
15	38	2.5	2.05882352941176	2.58333333333333	3.10714285714286	2.66346153846154	2.48076923076923	2.5	3.22321428571429	3.20192307692308	3.16666666666667	3.42708333333333	3.25	3.42307692307692
15	39	2.58035714285714	1.96323529411765	2.34821428571429	2.88392857142857	2.76785714285714	2.48214285714286	2.58035714285714	3.05769230769231	3.05357142857143	3.16964285714286	3.47115384615385	3.03125	3.58928571428571
15	40	2.61666666666667	1.79411764705882	2.47321428571429	3.01666666666667	2.80769230769231	2.44642857142857	2.61666666666667	3.35714285714286	3.11538461538462	3.20833333333333	3.31730769230769	3.18181818181818	3.48076923076923
15	41	2.29464285714286	2.02205882352941	2.57142857142857	3.01785714285714	2.77884615384615	2.47115384615385	2.29464285714286	3.03571428571429	3.16071428571429	3.18269230769231	3.41346153846154	3.16666666666667	3.55769230769231
15	42	2.47321428571429	2.04411764705882	2.55833333333333	2.95	2.78571428571429	2.66964285714286	2.47321428571429	3.125	3.08653846153846	3.00961538461538	3.23958333333333	2.875	3.5625
15	43	2.825	1.90441176470588	2.85714285714286	3.20535714285714	2.81730769230769	2.52884615384615	2.825	2.99107142857143	3.0625	3.39423076923077	3.11538461538462	2.86458333333333	3.54807692307692
15	44	2.44642857142857	1.9921875	3.01666666666667	2.9	2.84821428571429	2.58928571428571	2.44642857142857	3.13392857142857	3.10714285714286	3.26785714285714	3.20192307692308	3.03409090909091	3.24038461538462
15	45	2.51666666666667	2.11764705882353	3.05	2.98214285714286	3.06730769230769	2.58035714285714	2.51666666666667	3.17307692307692	2.98214285714286	3.21875	3.19791666666667	2.83333333333333	3.32692307692308
15	46	2.66071428571429	1.97794117647059	2.99166666666667	3.00833333333333	2.77884615384615	2.50961538461538	2.66071428571429	3.0625	3.11538461538462	3.33653846153846	3.32692307692308	3.1875	3.15178571428571
15	47	2.475	2.00735294117647	3.05	2.85714285714286	2.80769230769231	2.66964285714286	2.475	3.125	3.10714285714286	3.30769230769231	2.98958333333333	3.02272727272727	3.14423076923077
15	48	2.41071428571429	1.95588235294118	3.19166666666667	3.00833333333333	2.82142857142857	2.72321428571429	2.41071428571429	3.25	3.03846153846154	3.3125	3.30769230769231	3.60416666666667	3.38461538461538
