# Supplementary material for: Two central pattern generators from the crab, Cancer borealis, respond robustly and differentially to extreme extracellular pH
Source: eLife journal article supplement (doi:10.7554/elife.41877), 2018-12-28
Supplement: supp [file elife-41877-supp-v1.zip › elife_poa_e41877_Figure_3_source_data_4.csv]

prep	bin	pH78_1	pH55	pH61	pH67	pH72	pH78_2	pH78_3	pH83	pH88	pH93	pH98	pH104	pH78_4
1	1	0	0	0.235827910883746	0.234447050079572	0.212899656674027	9.61654054978755e-05	0.160299671099905	0.17394067341287	0.0928699333657855	0.0592716680173763	0.000126551503528451	0.00011691002081263	9.61654054978755e-05
1	2	1.90897973132946e-05	0	0.2572601484806	0.241534607495872	0.212958153704092	0.0377876023381053	0.166894528772792	0.161783028848383	0.108767110177197	0.0353714271677156	0.0153249120829007	0.00011376575840576	0.0377876023381053
1	3	0.000102756132137492	0	0.210690942247763	0.25807767890009	0.196760838102413	0.000105231605307596	0.15673088617561	0.164140278083244	0.106379840302454	0.0273964204618882	0.0301155388734351	0.000110547263388674	0.000105231605307596
1	4	0.000121197467065708	0	0.230773820588819	0.227799741866022	0.194699623242183	0.000104779626187955	0.162799795387782	0.149924178251265	0.128389889919906	0.0357750770324417	0.0119464405001412	0.000106329671870842	0.000104779626187955
1	5	0.000135839445855545	0	0.218573659677242	0.233950071136459	0.193377403304131	0.020032147705106	0.155090241440531	0.151749769515492	0.107024110713299	0.00907607464318349	0.000117976352916624	0.000107493222433953	0.020032147705106
1	6	0.000159142463785355	0	0.218407672381131	0.234493643419768	0.196799493855189	0.0169645045528395	0.165941786771083	0.173572652964347	0.113395058545738	0.000125467115439974	0.000117877778863069	0.000107490962462626	0.0169645045528395
1	7	0.000169833238024517	0	0.236227294547167	0.226107710649792	0.189388952480717	8.51204793846956e-05	0.165629471902226	0.154696201360475	0.106032031356303	0.000126481733710745	0.000120563497950684	0.000114874703386905	8.51204793846956e-05
1	8	0.000170282160775092	0	0.226809343442188	0.23185217718789	0.186721107939271	9.99575475500384e-05	0.149823142310057	0.155747445230887	0.107275670886645	0.000124650771176166	0.000122895961527387	0.000101252063433519	9.99575475500384e-05
1	9	0.000165923333425207	0	0.245555220905631	0.236356565429716	0.215602827250562	0.0162461833311183	0.122251735732442	0.145171782591071	0.0940158126602059	0.000125934470431581	0.000123292868825838	0.000107843754162063	0.0162461833311183
1	10	0.000174426686686966	0	0.220220820694069	0.218742409702278	0.198223023752278	0.016444547643175	0.129355773971501	0.127915824356817	0.106534351951362	0.0001260127053753	0.000123026572835249	0.00010890935810353	0.016444547643175
1	11	0.000169290458298107	0	0.227811731588319	0.228385092194313	0.202805182454404	0.00685547386902103	0.158345045191411	0.1343555558573	0.100801407549797	0.000126507802863896	0.00882710741703227	0.000108291103620799	0.00685547386902103
1	12	0.000184776853108191	0	0.25052412201487	0.229786629868521	0.204185937086128	0.0126997760938831	0.151666787951543	0.132826434579048	0.102625236282188	0.00012635088489111	0.00847814387762409	0.000102377982094898	0.0126997760938831
1	13	0.000187231093732717	0	0.232749928924151	0.233675539549903	0.193777365161799	7.72272739821882e-05	0.154696322853038	0.123638615848289	0.0962125919967197	0.00012749834894723	0.0193695128171655	0.000113756572634385	7.72272739821882e-05
1	14	0.000177839793317296	0	0.218309675500559	0.220796429051285	0.18819862343596	9.04340006511004e-05	0.151305277837132	0.134412692685729	0.096574417184693	0.000127962522620874	0.00012493421287836	0.000111942624960626	9.04340006511004e-05
1	15	0.000182969773186922	0	0.231937979042351	0.225740765303515	0.18773877373814	9.73776087965906e-05	0.149311581480244	0.125738297166272	0.0969430574683677	0.000126911577261262	0.00012217932397435	0.000108550984010545	9.73776087965906e-05
1	16	0.000198574391634301	0	0.224052127022675	0.201427299464864	0.206640462457771	9.18599288866154e-05	0.148116935587474	0.137368252466865	0.107087190412502	0.0100924067748346	0.000124295269142813	0.000112610958584827	9.18599288866154e-05
1	17	0.000245413251107747	0	0.248477601015544	0.237983849516972	0.203400544471862	8.78983845597564e-05	0.159244276577772	0.146912899200582	0.130381300421766	0.000128090374730056	0.00974162570334865	0.000116219684092187	8.78983845597564e-05
1	18	0.0583664449239097	0	0.214663207378822	0.239120426810432	0.196891305937358	8.89752201735693e-05	0.154008392728656	0.140759846340485	0.152502537531323	0.000129416423950102	0.000122898084622437	0.000111321055228299	8.89752201735693e-05
1	19	0.00024857812568303	0	0.222260273760135	0.223756050147517	0.195433721282103	6.76330368985281e-05	0.172087737628079	0.139319006690482	0.163553205262908	0.000130489371812533	0.000122524831719791	0.000115151895489958	6.76330368985281e-05
1	20	0.0669526474273076	0	0.238154489371288	0.22992158379809	0.213182791836634	0.019042962852558	0.160169243199282	0.123578203324538	0.156841958249446	0.00848685008447671	0.00941803957131078	0.000113018819455704	0.019042962852558
1	21	0.0551294381505537	0	0.229061205211349	0.208278724724426	0.200738260316223	6.85668559490579e-05	0.15032490864702	0.135453797177745	0.158092876264635	0.00854429437964152	0.000123528594310534	0.000113882902813922	6.85668559490579e-05
1	22	0.0133853777342185	0	0.247471544544705	0.224748465412215	0.196421692334083	7.61759619485757e-05	0.173284675228206	0.165367492688113	0.148016608070581	0.000129967198163667	0.00012360108440694	0.00011474766010316	7.61759619485757e-05
1	23	0.0706931779571168	0	0.226864132532992	0.231753402636626	0.22008123487009	7.67711629730486e-05	0.165508963011601	0.136160804515819	0.156534594768288	0.000130280764205289	0.0203314392970162	0.000116001560384949	7.67711629730486e-05
1	24	0.0607912173490555	0	0.223846202319132	0.232541774494718	0.19615869442267	8.97949617037899e-05	0.156687727988493	0.125148589343255	0.152701289829831	0.000128880896214021	0.0183279326399727	0.00894417242142438	8.97949617037899e-05
1	25	0.0581962072319763	0	0.251472892337633	0.238324493162138	0.208948902871717	8.64638754231704e-05	0.148414677106901	0.122197366674123	0.162721350661343	0.000129103280157109	0.00968353961879593	0.000113983105952038	8.64638754231704e-05
1	26	0.0401601122059065	0	0.224891386525794	0.247422654996826	0.207394639836036	0.0227101440996721	0.150623821755144	0.121735700736577	0.15915502856011	0.000130113488033107	0.00876966874173168	0.0112319750597011	0.0227101440996721
1	27	0.0403158085014977	0	0.244574749141373	0.244060143646333	0.210913654001928	8.52135001555171e-05	0.147035115595136	0.127396931580691	0.141116192701569	0.000130451335308715	0.000124287867521956	0.000112523721855679	8.52135001555171e-05
1	28	0.113458427726502	0	0.221949233243581	0.225207058663817	0.213290680068656	8.05262029578073e-05	0.157953014444426	0.119360847360712	0.152541383906509	0.000127664649862175	0.000122492228070194	0.00011001877863202	8.05262029578073e-05
1	29	0.0612740531616249	0	0.235503453429649	0.230082827969733	0.215628097529488	0.0163421207378846	0.155804456741684	0.125060534451112	0.152967976526377	0.000128382200117248	0.0198409195742105	0.000111223150128107	0.0163421207378846
1	30	0.108693005428884	0	0.231485991107957	0.245618335698916	0.218783748298431	0.0184796654700085	0.160912180083103	0.125129609840234	0.145479357367023	0.000130183397807711	0.000123236272067204	0.00010416047982726	0.0184796654700085
1	31	0.0693840803482825	0	0.237868045008039	0.238909608064688	0.224771257731093	0.0530449829436323	0.151069603448373	0.154109244054173	0.113845512355136	0.000128217567304133	0.011469625842164	0.000111329138740087	0.0530449829436323
1	32	0.118442181037596	0	0.234401385301795	0.245359866104667	0.228574218983569	0.0694148004357077	0.155869056677324	0.140414325466822	0.118693140841084	0.000128314354099075	0.000123005861701564	0.000109729361686473	0.0694148004357077
1	33	0.108501996823799	0	0.243747774575179	0.235534278468943	0.222412980301948	0.0735081559282151	0.158685933934574	0.137395148749267	0.126729298789425	0.00012811978739526	0.00754162962489843	0.00010820660182113	0.0735081559282151
1	34	0.0876935823061766	0	0.247071963383239	0.229790859848524	0.216752813411681	0.0910501414043283	0.161572871306227	0.121523972604291	0.132582421511303	0.00012980649914965	0.000125532124941713	0.00010916062997798	0.0910501414043283
1	35	0.143556772547645	0	0.278020851825157	0.230562225028597	0.222946509751087	0.0916187862516221	0.167910301492761	0.112248866058628	0.113989064667374	0.000127573420150091	0.00815118835656716	0.000107169621087048	0.0916187862516221
1	36	0.121059112367518	0	0.271669728377553	0.225078719194716	0.220912421993559	0.103551385262086	0.172543887312526	0.116526060525158	0.12778200614756	0.000128393265992596	0.000124701363015451	0.000109951311855441	0.103551385262086
1	37	0.181849559370492	0	0.270232852773386	0.224192441322673	0.222345513300862	0.133933266122463	0.161156513262466	0.128780650173431	0.116328083305435	0.000125137457165536	0.000123977802543676	0.000110412270388188	0.133933266122463
1	38	0.171787170677233	0	0.29963503147824	0.224229795137549	0.222536621547074	0.138530265391547	0.149134161017872	0.123070576892827	0.119770781985886	0.000126083268373723	0.00941553769012904	0.000111789156440021	0.138530265391547
1	39	0.112036721760165	0	0.304137175183904	0.224148459305889	0.226061755925179	0.124935425357626	0.155881989096279	0.125751886809935	0.103395906984382	0.000125968636703743	0.0255625318820722	0.000111620869124544	0.124935425357626
1	40	0.172976430734103	0	0.328545707057545	0.222510764459534	0.225278842816752	0.122477156678613	0.160290603792102	0.125601704718791	0.0876677237153895	0.000125246936135505	0.00821382035474343	0.00830498205486961	0.122477156678613
1	41	0.177198707405841	0	0.303587804271126	0.222641214161532	0.22455918418951	0.116463220982847	0.156769893370166	0.140438722322885	0.0863263492743631	0.000125309655020864	0.00844826594864745	0.00973145400142346	0.116463220982847
1	42	0.185408795562888	0	0.287938686941314	0.221852659929819	0.220946674776677	0.120493690944262	0.154643885990917	0.11948949383906	0.0793835320209695	0.000122919955387066	0.000123714039059512	0.000108563304752298	0.120493690944262
1	43	0.192632152274531	0	0.294190788774489	0.222888028396912	0.227110525567159	0.135855291007565	0.141815787229354	0.126841384843638	0.081982494279625	0.000121850708021608	0.0104091098493796	0.000108447483171542	0.135855291007565
1	44	0.150485876077182	0	0.290665807699902	0.22287398196543	0.23109338912091	0.170438914460645	0.152742406664668	0.124931307888212	0.0744079423963559	0.000121595124915387	0.000124355629753298	9.89647540824799e-05	0.170438914460645
1	45	0.197419543896648	0	0.270473786743001	0.223851664451927	0.230256893272054	0.158968709566974	0.158949475664966	0.109596777786196	0.0690056226599063	0.000123942336287996	0.000122814947703169	0.000108787414793408	0.158968709566974
1	46	0.197644890305553	0	0.27719002036754	0.226177175711373	0.227228979218172	0.169795607875071	0.166300612665579	0.134683854350948	0.0793536342263285	0.000123908874300022	0.000123921409103749	9.94442747090792e-05	0.169795607875071
1	47	0.214472102778115	0	0.271747238075407	0.227122384134859	0.225638768262996	0.163545563361413	0.146991681658492	0.119791483645669	0.0725930926191393	0.000125645913108688	0.000124062086787799	0.000105023730770448	0.163545563361413
1	48	0.226034429473862	0	0.259769817992386	0.227199022243543	0.229787370904796	0.163643199642083	0.160661277652411	0.127098944426506	0.0713870036727396	0.000125789332393531	0.000121480662088956	9.57840650472306e-05	0.163643199642083
2	1	3.19855429236401e-05	0	0.207060874806073	0.215909044392236	0.195498256680469	0.210011147782586	3.19855429236401e-05	0.192023324733739	0.124741384392561	0.086647074907059	0.0852196328848778	0.117335463585176	0.099267880622697
2	2	0.000577113286524449	0	0.203721577695272	0.221350054720458	0.193166867249347	0.223404364612346	0.000577113286524449	0.192125800775568	0.133051090740604	0.0777563142723511	0.0803601257324918	0.131993640989348	0.0752041586825573
2	3	6.99516347745675e-05	0	0.243643157324161	0.221524281548036	0.19106944218164	0.210006131196554	6.99516347745675e-05	0.185671076941054	0.120939504823621	0.0742024303870488	0.0951716478903415	0.115538329561151	0.0787930748895563
2	4	3.66733913654915e-05	0	0.240167872132816	0.222704234887245	0.192300323274612	0.202148137560067	3.66733913654915e-05	0.188011607761152	0.121485133176659	0.0699631854939472	0.0628823018356276	0.126573076597077	0.0860962847802152
2	5	0.000258299675617267	0	0.22111961938748	0.211533907927229	0.194742877597899	0.19720538789095	0.000258299675617267	0.196939051121936	0.123019640691663	0.0708003840239172	0.0621404651487046	0.123771094698892	0.0957002710992738
2	6	0.00164016011231222	0	0.184744405734012	0.216881254178498	0.194984856338487	0.206322469612414	0.00164016011231222	0.185024248627187	0.130844750257228	0.04056521062474	0.0694546858823037	0.12134110381256	0.096707296750451
2	7	0.0464123354365006	0	0.192169521142181	0.220309904227557	0.194095709911453	0.196788518133909	0.0464123354365006	0.18140380490292	0.128846343842157	0.0500572034810991	0.065244296019753	0.120757373574644	0.09808370004894
2	8	0.0352385331167107	0	0.223111547389572	0.232182795596225	0.194366749926873	0.198277155434952	0.0352385331167107	0.188621277534217	0.125800350644472	0.0564172119575021	0.0634011705433	0.119847220506751	0.0987382486878726
2	9	0.0421131672009749	0	0.218162811506197	0.210092548845636	0.194654137903334	0.19076251774909	0.0421131672009749	0.191460034127889	0.130665065265406	0.0505460846984859	0.0714373428149501	0.112094025295073	0.0778225820787161
2	10	0.0199026010882916	0	0.194614830112382	0.226709172886965	0.193562831808225	0.18888340868769	0.0199026010882916	0.18722095472715	0.127974384287605	0.0834575130433093	0.0611228410005309	0.120938515071517	0.114514726710416
2	11	0.0718444611205077	0	0.185082716072259	0.222179380174829	0.193608880752776	0.184826356593637	0.0718444611205077	0.180867677587913	0.125685555592161	0.0487782215030839	0.0646897507296511	0.126085403245168	0.108919408487628
2	12	0.0700572892271773	0	0.202195407307753	0.223884500975123	0.192348053975647	0.18340386120859	0.0700572892271773	0.179334513439743	0.13323124655102	0.0738717684696655	0.0639395180417075	0.126559982743384	0.10236735527598
2	13	0.0930762804938284	0	0.225316073531972	0.229909170070623	0.19716947180428	0.185042909865556	0.0930762804938284	0.183684970760092	0.125962014284607	0.0530632286057144	0.0641790444818355	0.123135007916116	0.103110323736736
2	14	0.0811877247397491	0	0.215495158864247	0.22421004213721	0.19088337694642	0.185448570881608	0.0811877247397491	0.198477459502621	0.125539539222252	0.0676529142156461	0.0677993332237425	0.122457884359492	0.0899473813844152
2	15	0.077822381066786	0	0.219998812873174	0.227798256044136	0.194400690733855	0.179706062862087	0.077822381066786	0.197572567576628	0.125260260211519	0.0743156625537581	0.072635358813368	0.115989223770714	0.0976198560906029
2	16	0.0858149287425107	0	0.216989731391933	0.214650518869797	0.194539782780264	0.177992924223241	0.0858149287425107	0.213378994171796	0.12855216732446	0.0523373636149197	0.0757328811849471	0.116262634967374	0.0979765531684923
2	17	0.0933776911359037	0	0.245026681773469	0.241328342817706	0.192414169249309	0.182177465324556	0.0933776911359037	0.188988871008527	0.12491585924887	0.0529939597537609	0.0703845797011926	0.116757355028949	0.0944540977050183
2	18	0.0395902504187889	0	0.216502274215435	0.229399950382055	0.19311840053368	0.183013955928174	0.0395902504187889	0.176000647387634	0.12400335329845	0.0499284408418204	0.0735708085982111	0.11309803821049	0.114339637308116
2	19	0.158814784376003	0	0.19307840989655	0.236709397998316	0.191629645508694	0.187977801840402	0.158814784376003	0.195593813112541	0.127601703473067	0.0616622511556495	0.0800355581951027	0.117997922540971	0.10873448670477
2	20	0.105264271403141	0	0.218505106801732	0.241509954834377	0.194822803514399	0.18173566086126	0.105264271403141	0.197386150379507	0.128792048665248	0.0771186679120738	0.0701384464917289	0.117659545536393	0.0988337195024654
2	21	0.0723299930734445	0	0.215975807998277	0.228651326418061	0.19648404122751	0.182841398037879	0.0723299930734445	0.186323007686172	0.126304290961856	0.0356803630172556	0.0720873873192175	0.114628811222247	0.116604330550118
2	22	0.137532862105449	0	0.193845696978263	0.24736629905531	0.197000946458284	0.181646333230156	0.137532862105449	0.194236229918865	0.128480978041911	0.0513269017990732	0.0709467756492634	0.114458669122644	0.104760023317489
2	23	0.0878868816059953	0	0.18752681735036	0.257684686935968	0.197075948537048	0.182601651006595	0.0878868816059953	0.162883865945363	0.130006503126808	0.0598905282593051	0.077061449049774	0.11424321358074	0.113178973268351
2	24	0.115366144676212	0	0.20803438284119	0.246010479307539	0.192274994685091	0.185173889650812	0.115366144676212	0.177751060647177	0.127593947741633	0.0549609844048769	0.0924230159414644	0.114868288755991	0.123178685208223
2	25	0.079037333242551	0	0.192617400831506	0.247624036849495	0.194463080104482	0.182827235814671	0.079037333242551	0.195018911992979	0.132378067086259	0.0664588986136434	0.0811025818938003	0.116774536630693	0.120076390097177
2	26	0.119763112499723	0	0.23135098164363	0.246367821545796	0.193626194957092	0.182668998769744	0.119763112499723	0.163883381780632	0.14398565712367	0.0889301847642752	0.0646596744626165	0.112696024912186	0.11867716407356
2	27	0.123660543663353	0	0.210343045222332	0.243815370664782	0.196033496961913	0.184531408217949	0.123660543663353	0.163222627651507	0.137943899678446	0.0601746788985113	0.0795552603362418	0.114193969356232	0.133112750269275
2	28	0.12212377955642	0	0.175944542117434	0.23718645744037	0.204722164614366	0.186031288213336	0.12212377955642	0.168973397509147	0.12945581789965	0.0263827788960142	0.0850883278341406	0.110981385887027	0.119849522650878
2	29	0.15175788348005	0	0.1809872419667	0.228196987659206	0.19658617749698	0.184721893566842	0.15175788348005	0.16809530973589	0.114658360716266	0.0350636507883563	0.105327922125407	0.110257872622421	0.115353017234021
2	30	0.126578785366251	0	0.198232574938199	0.227354444174439	0.196206479691447	0.188998536124295	0.126578785366251	0.168862365322945	0.0779772797976795	0.0635407592792712	0.0982808650449478	0.114673388491169	0.121937520644459
2	31	0.139490173930044	0	0.213198047569214	0.224110324245151	0.196508041161989	0.187874460678001	0.139490173930044	0.164434985287801	0.106147155795961	0.0423474271481507	0.0999753184645629	0.110921325448776	0.125079529361714
2	32	0.163886910685574	0	0.234376859342066	0.227894678020938	0.196294570916525	0.189158376062385	0.163886910685574	0.164666193445388	0.0832270989465165	0.0395617690791066	0.0991176434537569	0.113196849068714	0.121956036240296
2	33	0.132358048351559	0	0.197975135962784	0.224067335845128	0.204516056987109	0.18818411142301	0.132358048351559	0.157185536002654	0.0782575710735704	0.0470479126586228	0.0885180189701987	0.115884654969122	0.119295037514639
2	34	0.1205721405385	0	0.201574748800903	0.215446659922554	0.205968872527022	0.189176531259061	0.1205721405385	0.172247675398285	0.078944907489397	0.0641326268678285	0.0856234719241167	0.119263681019732	0.133146425338336
2	35	0.15188454497946	0	0.199920352709607	0.212691063637541	0.197327828341931	0.186483963614349	0.15188454497946	0.157211955236884	0.065685404280293	0.0409042782215084	0.102632324942284	0.119093200430076	0.123801668718578
2	36	0.16421219448758	0	0.207449259282599	0.21809874656047	0.195160987877643	0.187878686510067	0.16421219448758	0.17092412645217	0.0716027065575495	0.0810678235381842	0.0965714076475322	0.118183360439031	0.133655781938642
2	37	0.157066896962276	0	0.204249768685599	0.217772518929754	0.211129977022049	0.186288096353882	0.157066896962276	0.164287484693446	0.0810675305371207	0.0551089018159424	0.0892857068197565	0.119180657431804	0.135994122890231
2	38	0.144186449572337	0	0.198653726566644	0.210109888829033	0.203767425504527	0.189857153702132	0.144186449572337	0.15187686145083	0.0633636446465193	0.0671041007601228	0.0946996643506964	0.120745385839268	0.133575339986793
2	39	0.173257886458824	0	0.231616758593037	0.20704288951852	0.204901052072111	0.191510369473665	0.173257886458824	0.145405205413162	0.0654521704151952	0.0746126688083438	0.0981404598454304	0.117425756118539	0.132816844407565
2	40	0.16563521706441	0	0.222799346356385	0.211826428208863	0.19390376435038	0.191925778605591	0.16563521706441	0.17023954402912	0.0851204140902436	0.0533354745127596	0.0901368379077128	0.118766820147539	0.137427202772839
2	41	0.175600349326003	0	0.250407057780183	0.210887240637409	0.19747637787282	0.191157988607277	0.175600349326003	0.146586948920265	0.0769604210631026	0.0798492059518031	0.0860494102433489	0.126253162525322	0.147376304307365
2	42	0.181562549473694	0	0.232831462922909	0.209296027837284	0.193967966595629	0.191982685262925	0.181562549473694	0.147964220560403	0.0673795520122368	0.0669942188520137	0.096851106458213	0.112988354751547	0.135979061987419
2	43	0.200602198865738	0	0.248450552992428	0.212074370468089	0.204886955397535	0.196402379880504	0.200602198865738	0.142133037219298	0.0672622047436545	0.0635879353794118	0.10275254376591	0.121938844592922	0.146625995298673
2	44	0.194122874230269	0	0.28869637382071	0.20373365584833	0.195882408387627	0.192312262138576	0.194122874230269	0.152938453188798	0.070959418046073	0.0624770513723386	0.11462318091774	0.121173255187754	0.14733307096995
2	45	0.171614165608802	0	0.263955372131524	0.20744597138274	0.192970502476153	0.190813341192507	0.171614165608802	0.147073495280146	0.0662103590850243	0.0838440850235812	0.0963814116026516	0.11018697323272	0.15097087042396
2	46	0.202672034521314	0	0.272348012158337	0.209271103071621	0.195290343735723	0.191542855214294	0.202672034521314	0.141589734378073	0.0683073613192661	0.0708574331767402	0.098981983513354	0.117563791199332	0.144519014363538
2	47	0.205444713266303	0	0.246599628107198	0.210365911524084	0.197068407337369	0.19803631500303	0.205444713266303	0.133390340568375	0.0654087949361291	0.0773519095892156	0.103198329664694	0.119971868415123	0.145167361833922
2	48	0.196006996546279	0	0.304954963614546	0.209620772651733	0.192121323386766	0.193779091141924	0.196006996546279	0.136734651143123	0.0554258228425569	0.0750343768171652	0.0973787064673246	0.102521086342388	0.147880968607209
3	1	2.95603779261959e-05	0.175539257674832	0.213223161396159	0.221380005731662	0.208878123213409	0.245824845353819	2.95603779261959e-05	0.233843591896943	0.203987102157782	0.167056077417198	0.178234997601371	0.192436679134488	0.235136595392552
3	2	7.11022122563852e-06	0.192163878781067	0.211882841792344	0.203840598404741	0.235516694929735	0.2326298699247	7.11022122563852e-06	0.234847709595468	0.195941064211609	0.172806171255655	0.173067830729558	0.226947018623263	0.182999611700704
3	3	3.82638224466074e-05	0.174498666145869	0.20564076140521	0.200342838525591	0.214619252921242	0.217166058243587	3.82638224466074e-05	0.231755130083817	0.213178101690202	0.170340443143443	0.159609513355542	0.226441262821066	0.198494751110897
3	4	0.0195119762306739	0.189999129772076	0.202280165553739	0.185375238591673	0.222501463716162	0.214921768036046	0.0195119762306739	0.227236459839418	0.203639264233984	0.193357388369575	0.160061588001985	0.249867464183935	0.194906396727358
3	5	0.0101612805960603	0.149119774948692	0.195790620676673	0.190231316235468	0.200179474335933	0.24623633205205	0.0101612805960603	0.208684326333843	0.199274031677771	0.183408017900081	0.166192844953478	0.181220559590845	0.188940190960195
3	6	0.0173493557161982	0.174834238660217	0.202228260135725	0.206708367487391	0.222780872672059	0.222361773870165	0.0173493557161982	0.226103406508158	0.218031066946861	0.193315784460515	0.168550788493715	0.181768516147734	0.177052672597218
3	7	0.0619156399314082	0.178772539745638	0.208711348690256	0.193027489805391	0.20868355173032	0.209704390116076	0.0619156399314082	0.223707686035681	0.192196938739781	0.19792120982516	0.188453652231766	0.185550119470998	0.198619361028519
3	8	0.0443526648141079	0.187219966426279	0.214353138152158	0.231115478709977	0.2193477816482	0.207289100404537	0.0443526648141079	0.223028912943928	0.204210672789186	0.175314367412258	0.179093103268967	0.199546081980661	0.181752997140225
3	9	0.0319582959480604	0.179555928773781	0.209456347422253	0.21676110527826	0.22168276399609	0.221188633830125	0.0319582959480604	0.224506888040097	0.204129761569806	0.175415135815822	0.174887254348503	0.183355510657672	0.201641608362865
3	10	0.0302180228406294	0.175593606537217	0.210296309812367	0.222920692542237	0.223262128029114	0.20776470932948	0.0302180228406294	0.223973985582726	0.182711876983713	0.202661952002491	0.161912717382772	0.216831487303604	0.192965744751768
3	11	0.0416289024582593	0.18805301851304	0.210180724793519	0.199029285562041	0.25225640066731	0.23183735037169	0.0416289024582593	0.186195475760189	0.187938531922172	0.190783740828674	0.161141721523903	0.221384544756703	0.22062037398392
3	12	0.0293565929485487	0.159206163711195	0.202478330328664	0.197505214247937	0.242979437025193	0.223131585911203	0.0293565929485487	0.230963722117853	0.202080100565914	0.204825783982308	0.162439176303353	0.185529535829363	0.216140546999224
3	13	0.0552362829490218	0.163032685238029	0.208049306556988	0.212760339016989	0.258349675748296	0.211317363056932	0.0552362829490218	0.222815136989103	0.19492512187742	0.174460496765525	0.174996729732611	0.187139816745417	0.217342945346615
3	14	0.0463736346114178	0.175182398900364	0.214543016800934	0.231898666059804	0.254542319594473	0.205883435008121	0.0463736346114178	0.23361221719648	0.185836565987707	0.17423242169905	0.167890800949317	0.227940680583815	0.210092622095672
3	15	0.0622535601615344	0.167761420597687	0.208392754032158	0.225548423314109	0.247502370957596	0.205406715367038	0.0622535601615344	0.214711205480361	0.211360548750204	0.181997400797397	0.155633223752615	0.231698553333443	0.214770781652495
3	16	0.064527282687004	0.180783165730384	0.218352244738707	0.213671528481706	0.25908158335245	0.216556101198726	0.064527282687004	0.221472114295597	0.204843681749282	0.177724634760973	0.161300015852076	0.194895077674345	0.211420972669984
3	17	0.0509165948716786	0.17482873659965	0.208981491924642	0.201903094007601	0.261128976843958	0.241974123054647	0.0509165948716786	0.220979328257066	0.182956595582711	0.173464569471949	0.177987083915186	0.207395177257982	0.205700863972972
3	18	0.0666105312909338	0.176419070394072	0.213626817305509	0.215013480438798	0.253139042469636	0.244698562968372	0.0666105312909338	0.207230339196688	0.188232378310938	0.170848953837082	0.171707773167528	0.234896646176654	0.207527771103879
3	19	0.0785452984925363	0.188062605397736	0.225567522289052	0.239677429034751	0.259167538009384	0.226903941564112	0.0785452984925363	0.222100331244877	0.208362672489236	0.1860852074602	0.166843750416223	0.220055160226448	0.212097256673131
3	20	0.075809508630796	0.199207853913948	0.220680602634125	0.204669645197667	0.25157844057468	0.215113742682114	0.075809508630796	0.229780980172744	0.187271745762141	0.186313346617301	0.159585894258127	0.193329696882371	0.203694702240119
3	21	0.0927715399159694	0.208014806688961	0.218504401037838	0.206929201172093	0.263496486946095	0.204230684018363	0.0927715399159694	0.22497460329741	0.192127327922815	0.161901362354398	0.159714518559965	0.179480306440609	0.197861429732075
3	22	0.12579540878888	0.213476714144547	0.218251514275668	0.205714164288744	0.257251226779714	0.217107057275491	0.12579540878888	0.23940880968926	0.19755430406443	0.141335734892398	0.198063474617105	0.234330553130669	0.193952231174441
3	23	0.113030238158669	0.228638550655846	0.21057642573113	0.198398289462016	0.258260935858343	0.244732758544807	0.113030238158669	0.224918638148018	0.199370586092499	0.149784529328346	0.209071015251034	0.191875509951364	0.209549400926115
3	24	0.105549066871001	0.226275524585283	0.210831207090665	0.200121074012839	0.26255212341712	0.241345341487983	0.105549066871001	0.220506563527188	0.213990784317167	0.155026236068159	0.177481389907512	0.225722041812	0.200356873776126
3	25	0.0917244984243319	0.224898367563311	0.21745215677489	0.206392335147814	0.26411868419667	0.207746052538962	0.0917244984243319	0.227611913801956	0.213576658306876	0.162176747251633	0.17306745865531	0.18825627106825	0.207717329470988
3	26	0.15177127817054	0.218634712368961	0.207490998156587	0.190869282810435	0.258265906016781	0.224325137962843	0.15177127817054	0.217988948160482	0.215359736378868	0.187229949693775	0.159912470161405	0.22037736537654	0.190665723686778
3	27	0.113413364017274	0.207275823419416	0.226976512896791	0.190050721356912	0.262308859288306	0.200925555676131	0.113413364017274	0.213564276253336	0.216821617901016	0.148009578188915	0.154537849825134	0.203362915640021	0.187037762028538
3	28	0.105591452090291	0.202726133488401	0.241662984434238	0.182697421449103	0.265879997183517	0.201321759821244	0.105591452090291	0.229075254538836	0.2031859234088	0.144846209792663	0.159138184160398	0.284248966782078	0.209650882645585
3	29	0.111921155331537	0.197464248707041	0.216010788285365	0.236812418293322	0.259657071715726	0.197297177315518	0.111921155331537	0.228346505931794	0.214393254796942	0.151273829727215	0.15735722286459	0.243809223612581	0.190272502177918
3	30	0.0965106585367924	0.198893789723273	0.217056320833739	0.230932060863308	0.265097197330128	0.218488277020359	0.0965106585367924	0.219181954983652	0.222526868817055	0.168509571273353	0.158125037772764	0.261150131201641	0.201035257623846
3	31	0.0901373635544269	0.21404087351685	0.205176711722293	0.205942799533027	0.25416269631701	0.20912702889008	0.0901373635544269	0.210689179553439	0.221968089714892	0.159256963223023	0.165091796963678	0.248758304550375	0.205287607116567
3	32	0.0923351740885017	0.221697695747664	0.222355321296757	0.196968133818966	0.246337822449002	0.207411161922349	0.0923351740885017	0.228577380492946	0.221158010007534	0.162209018998306	0.156633684244235	0.263084846380805	0.210272072004718
3	33	0.0892132530012441	0.227461581053389	0.218486866548978	0.195834609735493	0.254431128070532	0.209520549811643	0.0892132530012441	0.210682806830859	0.213223636502011	0.149527449227566	0.160789592334758	0.21911772371055	0.195819136483158
3	34	0.0998410913420922	0.240021379472709	0.242489574401757	0.186048356129653	0.239947800371806	0.215652393886969	0.0998410913420922	0.220394635331665	0.208334667408655	0.146155306610731	0.152930915691918	0.235336369796723	0.198201922965876
3	35	0.0768786537534921	0.210843857833524	0.226116018965963	0.209930818025217	0.247409842485109	0.208068430151934	0.0768786537534921	0.215175095367354	0.209939810311454	0.134588056767806	0.157155762899285	0.233222411700486	0.216771732751551
3	36	0.0765389781680152	0.239105371718375	0.235075791375573	0.198662153280347	0.253408271487725	0.223914731189332	0.0765389781680152	0.213637625877371	0.176250191233759	0.14604297473102	0.155019481505258	0.207589589191016	0.20424133021195
3	37	0.0801037748570932	0.19608675782927	0.210195040108309	0.183502876439104	0.251297355726107	0.22355693073995	0.0801037748570932	0.212713045223043	0.200613578306446	0.168670455729155	0.159444440594272	0.22688377551005	0.203584915030681
3	38	0.0873965874582322	0.246405874620972	0.243904648742887	0.187102776319725	0.249458358857028	0.197286394192537	0.0873965874582322	0.228981826106006	0.194942196013474	0.143710302367399	0.165263702483741	0.238753918987566	0.220222551071746
3	39	0.0756293071740572	0.22926442638553	0.206480563969266	0.241005351552464	0.2308384831733	0.240284188610946	0.0756293071740572	0.222340685400081	0.193148696314723	0.151710317873068	0.161303667852328	0.233097001182896	0.21931682461984
3	40	0.0725314743287908	0.213493556230641	0.202686684793084	0.229950584978649	0.208589433851652	0.232030791062231	0.0725314743287908	0.216046941388832	0.205338009236267	0.174896191498717	0.162276458039746	0.218906929969498	0.21492050876077
3	41	0.0619348119760542	0.229715164863346	0.199072127973274	0.205279749458244	0.217831761029945	0.222936571538279	0.0619348119760542	0.207264711297931	0.190317470360896	0.16903894874741	0.165960408093243	0.184809296793604	0.208600666143389
3	42	0.0977693272236586	0.199771086060891	0.23413974621127	0.202421455958583	0.215398924529215	0.240072094903227	0.0977693272236586	0.230733326609133	0.191518584519079	0.138504588629454	0.157842074450512	0.177397612922616	0.200041868522336
3	43	0.155759467954261	0.217346178194143	0.186787196034774	0.192287081431977	0.207314432282579	0.220602278733482	0.155759467954261	0.208973597250873	0.199152145794905	0.141180990624174	0.151722960719033	0.201790419021428	0.212737803373609
3	44	0.117501618448377	0.151176963113829	0.200291934633726	0.187407072543261	0.207454920762605	0.214864885308569	0.117501618448377	0.224863332758742	0.194391088451016	0.155587503622617	0.161034520664023	0.207770528965925	0.218328416177458
3	45	0.141835448539173	0.176977506915916	0.203485664159792	0.183413295600285	0.211749403665703	0.232475295816871	0.141835448539173	0.196645312690879	0.197698922510097	0.139780402976425	0.158113755480599	0.203363824630095	0.227591573390562
3	46	0.14376791743218	0.23364478919605	0.205616789431236	0.225983122127419	0.194591649222298	0.211830413914671	0.14376791743218	0.20393219839239	0.195587837963622	0.161562507480549	0.159151183519637	0.198330942234535	0.222330234360091
3	47	0.201254901865446	0.14735287113086	0.188419532919071	0.225237706899919	0.19034787655473	0.214062318387372	0.201254901865446	0.196657720523051	0.195962243041035	0.144619044641805	0.174416757160865	0.198945885253502	0.236646967568783
3	48	0.144709730344501	0.172086180722054	0.202518661434433	0.221969874983052	0.213513354479028	0.214875327331622	0.144709730344501	0.208701831974707	0.195122951606495	0.139680603424946	0.16671284364486	0.220528671619564	0.224987029720133
4	1	0	0.180914185588926	0.219552646257607	0.20001159924195	0.200429272434737	0.185067250175429	0.182595512112936	0.187414405349924	0.189396567609033	0.167054277386021	0.18551092379487	0.17014284033422	0.185067250175429
4	2	0	0.17830065973372	0.207348458071238	0.203355008113187	0.18925560031369	0.173766282925018	0.177672876326448	0.182237264794547	0.182819196211659	0.169974267531119	0.186765836625269	0.171851038762266	0.173766282925018
4	3	0	0.187174054734609	0.215907551195695	0.190383746659555	0.185373545698572	0.180916228383581	0.167318262205817	0.18445957855256	0.180478206223161	0.172100096816723	0.182962623770837	0.175982561874127	0.180916228383581
4	4	0	0.224990148318845	0.21535892746867	0.192298996609589	0.189110735974643	0.17143845216348	0.174824624576734	0.186854592172067	0.185355109534091	0.171534125496866	0.19149489437209	0.165456168651685	0.17143845216348
4	5	0	0.182956894598708	0.219606647648694	0.195303131487226	0.20244872969213	0.175456648805827	0.16836298162837	0.206506716111198	0.187022452747113	0.164286618043575	0.185848759362943	0.181133613067946	0.175456648805827
4	6	0	0.179405972559081	0.212019712808847	0.187469070579001	0.188278590292986	0.182699046460928	0.182977060322073	0.182667254435502	0.185979349325891	0.178181713573573	0.184857639162613	0.17622058921413	0.182699046460928
4	7	0	0.197990518047815	0.200808332197191	0.198715104275022	0.190113313549726	0.184928355227425	0.168835967767681	0.186721100091541	0.185983817383271	0.179267916032492	0.184540084583676	0.172341170074773	0.184928355227425
4	8	0	0.182306575024596	0.217818733477892	0.195803801848283	0.206590583368358	0.16357000304451	0.167582134624998	0.183300538300093	0.184282415755188	0.162310641282925	0.185977277969515	0.171772040119163	0.16357000304451
4	9	0	0.182877474825722	0.218014924355173	0.206331160134881	0.188264180705679	0.177193047234747	0.186423084050509	0.189705626903928	0.182414750480831	0.176504287126861	0.18395523256199	0.170869604017429	0.177193047234747
4	10	0	0.181104738464597	0.201693566626595	0.206747935374552	0.19186045056608	0.17284864611934	0.172458096212462	0.180550293168323	0.180950872704249	0.161720764174945	0.181973329708401	0.175276216525174	0.17284864611934
4	11	0	0.20813274708393	0.206271474193152	0.200645891174026	0.192608853752603	0.163378879295984	0.185769679758429	0.190751913413457	0.178097105136813	0.180150158431314	0.185165066580879	0.172188927643028	0.163378879295984
4	12	0	0.183333767165475	0.204716717058373	0.215505525977658	0.194173299228435	0.166380616155677	0.202210628851275	0.178653390628605	0.183055746804432	0.163195891443856	0.17956662513359	0.169104783489958	0.166380616155677
4	13	0	0.186165307036119	0.205901745777483	0.208284434479715	0.195518997281355	0.169992089142611	0.224089845236981	0.17934016101841	0.1847340272406	0.167204714147739	0.173870073279146	0.166818447489637	0.169992089142611
4	14	0	0.232105246411284	0.199228066162688	0.212346398025055	0.191472756121161	0.177628182060955	0.228689864820846	0.186009008989775	0.188988397914093	0.175644862795123	0.186938710274624	0.168883104933535	0.177628182060955
4	15	0	0.192005770003549	0.209689241885319	0.214409962498019	0.198135451020216	0.165035119073213	0.198412986305059	0.187299234922572	0.180827402054334	0.173174675828124	0.182913422818431	0.176865340015992	0.165035119073213
4	16	0	0.191422213763087	0.214286267348059	0.217984050628964	0.203859111885966	0.173639199627702	0.191523235938965	0.177349428468456	0.185662350511028	0.170272510466279	0.173027277361673	0.172380916872317	0.173639199627702
4	17	0	0.193572458028031	0.200555202319886	0.208812092533676	0.187295297792599	0.1708131034428	0.205221654133981	0.191423936974225	0.181043269341838	0.168854000684063	0.179470797373074	0.168659300564994	0.1708131034428
4	18	0	0.196493566003693	0.205529665205663	0.217374001700129	0.195356886665419	0.167023605752404	0.200303414607592	0.186214336438659	0.18163877491311	0.161778620989131	0.177121378981626	0.174045883794926	0.167023605752404
4	19	0	0.19827444201255	0.217590492862987	0.207852071187062	0.190862679054682	0.165898308022324	0.204436953881869	0.223274453965296	0.185832332455867	0.173420362064533	0.186297225339426	0.166832408770683	0.165898308022324
4	20	0	0.216144081550669	0.200179059560141	0.200223451737667	0.194361145430431	0.167109533121471	0.203377893937201	0.18694839691395	0.178111577490318	0.175799856423416	0.187302337682517	0.170498408549368	0.167109533121471
4	21	0	0.198809401353089	0.192848056654789	0.216460557286069	0.191084017170138	0.161899742527601	0.185304208708561	0.17752808011937	0.183124437544133	0.17060669196588	0.187391051077206	0.169123993904931	0.161899742527601
4	22	0	0.188081349080767	0.19481529507157	0.20850810596278	0.198509349345484	0.170228286097422	0.18644368275452	0.189794353026457	0.183553360920368	0.169871732966379	0.181911175516339	0.172755897453248	0.170228286097422
4	23	0	0.188375132169239	0.192289955564506	0.217380080632303	0.195957306444967	0.16080087065543	0.202997013647962	0.184168018159201	0.179450407810513	0.168671131731003	0.179331355587083	0.168567562261464	0.16080087065543
4	24	0	0.178451459528248	0.211458950114147	0.217439451922858	0.19153345005157	0.158609882448267	0.184716257372103	0.179213407250934	0.187813086487152	0.179226404825579	0.177193159977014	0.172477660306691	0.158609882448267
4	25	0	0.190902635081818	0.215877327518242	0.212530537038117	0.190860430200799	0.15835174580688	0.184499648352276	0.201645336221781	0.187900786554514	0.179063019589565	0.182173249086005	0.177293754813298	0.15835174580688
4	26	0	0.185905250785981	0.200442192893006	0.212712021359611	0.195570301403337	0.15645680255505	0.176989364900955	0.206444377927577	0.172354219325535	0.171423060330111	0.183096235805613	0.176638949343748	0.15645680255505
4	27	0	0.184212133012323	0.189846386917938	0.218745378183265	0.200240379721206	0.164899947280827	0.192328619816855	0.18439819146581	0.183227818308618	0.170155832288244	0.183032129376424	0.172451986683401	0.164899947280827
4	28	0	0.189782204922598	0.189158231078657	0.20416342173222	0.197248755959286	0.165767162697479	0.186875735475279	0.178639129334732	0.186051681268443	0.169607812279484	0.175662031857016	0.176501605599187	0.165767162697479
4	29	0	0.19227780854187	0.201144495029627	0.191026854845191	0.192683270480638	0.16137716607795	0.194030140337685	0.177056242190241	0.189784990103991	0.174339966974327	0.186406759926839	0.170637107924309	0.16137716607795
4	30	0	0.195960270509003	0.203611150718126	0.212995365111816	0.189823459115939	0.17350853829489	0.184807339560046	0.180464052387224	0.194692562944166	0.170383576758133	0.186220115305182	0.172755372694539	0.17350853829489
4	31	0	0.189777750650397	0.217576725998272	0.214071150954179	0.200720612189505	0.167821430976748	0.19459670282985	0.174877363691162	0.190577575538096	0.173737070130551	0.184160650010937	0.169452032087551	0.167821430976748
4	32	0	0.211156970270057	0.215989231543371	0.222604034152222	0.190423831751468	0.173829678682244	0.187492466745923	0.172993455378927	0.191807894537037	0.174239591910609	0.183195573964392	0.171911346638837	0.173829678682244
4	33	0	0.206885309201467	0.210505125662542	0.231290543844791	0.196053239882897	0.171695952075607	0.174061347704554	0.164157662240113	0.189111724121653	0.171588578034702	0.17915471291497	0.173518998518749	0.171695952075607
4	34	0	0.212116648624704	0.200069485268858	0.229423774616776	0.19497063503614	0.172894826123065	0.186624444528821	0.166853471100643	0.201056087607117	0.178412685578876	0.181326287571781	0.17219685513163	0.172894826123065
4	35	0	0.214480448757027	0.202012494128039	0.229996427643179	0.207713605701586	0.175362901684292	0.172606208731774	0.16647976606803	0.20161131600079	0.175281950772922	0.180664907841782	0.164235681136776	0.175362901684292
4	36	0	0.215262688437806	0.19949566184296	0.240348574293515	0.188515715156447	0.18615686258995	0.181944139935465	0.166031673690325	0.19618932594646	0.171232029413003	0.1891267421047	0.168886960275033	0.18615686258995
4	37	0	0.244474695670525	0.201202545629894	0.226033132509244	0.19245889104306	0.182300658702085	0.192077962159972	0.167307251930217	0.204088603908872	0.176828675698077	0.188991522827093	0.167946354369418	0.182300658702085
4	38	9.02115749849686e-06	0.228833466107208	0.212007735320436	0.232372537580329	0.196119207342304	0.186537603269748	0.181020160560727	0.161719871732865	0.207408875254119	0.17789585109891	0.183052551259889	0.168552948412932	0.186537603269748
4	39	0.00327235397988952	0.238864620794105	0.212204077208471	0.237138093930171	0.186610295660561	0.177288404420993	0.183931145517006	0.151998861898367	0.212341531578119	0.179184797121936	0.192387477710533	0.172450345731193	0.177288404420993
4	40	0	0.227592237899803	0.188079750540298	0.232316405764044	0.19301728747586	0.186435921155947	0.183816229135843	0.157135245238509	0.190740212559735	0.173608214913276	0.184658318994061	0.168667117065108	0.186435921155947
4	41	0.0253905878259682	0.250426585861845	0.207837915416105	0.229423402777664	0.193660202506354	0.190206489384504	0.177192919412968	0.155072579380215	0.184590604987027	0.171279790013282	0.18252542676728	0.165886120101113	0.190206489384504
4	42	0.0163055864675161	0.240079844231062	0.210825808183802	0.231322077632014	0.188703214805645	0.191052735960428	0.195730479658824	0.159572107550651	0.178318435925618	0.174473911760735	0.182535878906852	0.161836930832292	0.191052735960428
4	43	0.0487564774684391	0.26114010847738	0.216073580681719	0.225813815926196	0.185258327689997	0.191420485788352	0.184844355341169	0.152726775443838	0.18253265062435	0.178992674098449	0.181075940762901	0.168269749880218	0.191420485788352
4	44	0.0509174114605856	0.212366335851965	0.205737195932321	0.215815360379134	0.189750801026199	0.196514828180279	0.20483552799198	0.147088289860165	0.193626920140615	0.172656280410722	0.177630215536551	0.166043701711289	0.196514828180279
4	45	0.0580025243052077	0.177265221084272	0.218436336573278	0.216022194673315	0.191032569496018	0.194634369423044	0.170203270734951	0.151514466467521	0.168205261127418	0.170824935149358	0.177742382188103	0.17974848525311	0.194634369423044
4	46	0.0757883118285146	0.127166681934825	0.204213551354094	0.215752999917994	0.190704492121731	0.198033011822311	0.187306521817188	0.171024889446388	0.177507253765665	0.170804296764666	0.18250629306377	0.175913036615584	0.198033011822311
4	47	0.0500260793921664	0.136349346457086	0.201528509429047	0.209135673286737	0.194504720848735	0.189637829902166	0.182143638101149	0.166378397325658	0.174994046102948	0.168978276091031	0.182714330475107	0.181050372554785	0.189637829902166
4	48	0.0413661710143251	0.123329153388506	0.195040095982722	0.220494293321328	0.196219171561969	0.189830702258309	0.185277485324563	0.181096880589079	0.160225657438165	0.173930991481442	0.182411532131803	0.173418057826487	0.189830702258309
5	1	0.0350924058689467	0.202631647202796	0.203626287780024	0.214132730728384	0.191475063463154	0.184127339263713	0.0350924058689467	0.180193079102593	0.188895713594215	0.165020996979021	0.143050952506779	0.135523377919591	0.123894601214797
5	2	0.0441645081184827	0.197049506670159	0.189808466405318	0.215063550133158	0.193236276928272	0.186359209355383	0.0441645081184827	0.18160969123638	0.186128355650216	0.162195976834311	0.135916248877135	0.135082690330217	0.136487459081877
5	3	0.12431804438809	0.204818661833328	0.194434439471155	0.203421687477603	0.188767754701948	0.174517554248951	0.12431804438809	0.178245737381896	0.184026176038667	0.147966459581409	0.132954729323126	0.136874773024384	0.127254056236645
5	4	0.078768582099774	0.221262433013999	0.195792483485619	0.201479745195931	0.186698392888098	0.18531274281807	0.078768582099774	0.180209103203874	0.186459262607766	0.154857839590967	0.119677211421274	0.111264776891862	0.127027935169331
5	5	0.0777911976276571	0.203086065130009	0.198648431480706	0.220029488667165	0.185415187661719	0.178524727226483	0.0777911976276571	0.178125487352402	0.18145529379963	0.162281072579572	0.136525078708607	0.115094356587865	0.121981528497663
5	6	0.0823971465764646	0.200905761943775	0.200002893906019	0.214437862073456	0.186151839671105	0.187086611950134	0.0823971465764646	0.178647903588972	0.184990074162552	0.157545223950204	0.135370565033883	0.11064131935379	0.123414975107449
5	7	0.0640317468762451	0.211687513662196	0.200847210015715	0.213930788054771	0.187125739204076	0.170065388660719	0.0640317468762451	0.178693513141225	0.187905898255992	0.163511534483303	0.129283918319958	0.110755440293622	0.118295890916417
5	8	0.0621538036558459	0.204329070158211	0.210733740176019	0.201899447999496	0.178809005316314	0.174132368354657	0.0621538036558459	0.178094778142902	0.186347087160921	0.160323038384017	0.128463329909742	0.103117131397715	0.117563352424922
5	9	0.0541783865809069	0.19810544007236	0.212039525795987	0.175796583420222	0.195492128266675	0.167473322712553	0.0541783865809069	0.180005977285032	0.193603757755653	0.16675363033517	0.134909190448705	0.0901092146092008	0.123872061967206
5	10	0.159138188081987	0.198451861152639	0.215849269448608	0.181195181247208	0.189973509574757	0.165019503013987	0.159138188081987	0.177605804749941	0.201169642035269	0.167841255672868	0.134034145849302	0.102992670881701	0.11763316312296
5	11	0.0772496526975374	0.20205575384765	0.219539300345007	0.186356934334901	0.190696642725323	0.172301398286175	0.0772496526975374	0.179937298447945	0.197928478283183	0.16278053033047	0.127299674696189	0.0911531752030159	0.122197322454756
5	12	0.0723263950841146	0.175758991861038	0.222116012009244	0.192693368305876	0.18455550535508	0.168000575213982	0.0723263950841146	0.180623352098439	0.197926302863538	0.164580235031988	0.137169725060307	0.0937466125716641	0.129996732766765
5	13	0.0978302949714572	0.175505541142117	0.22799382919889	0.202941338767519	0.187240142626282	0.158722203871249	0.0978302949714572	0.180140272706672	0.200258923100125	0.159022082738189	0.128028607630921	0.0615690257639171	0.125867672883058
5	14	0.0959517473348849	0.195891061221191	0.225885482133144	0.207644203261238	0.184495348886556	0.161043399204889	0.0959517473348849	0.179446145136316	0.192944725613252	0.159884410414075	0.104484912161399	0.107816954779465	0.122393200523223
5	15	0.0458123214932661	0.172873172779216	0.218991263549928	0.213012527136162	0.193810321371366	0.157019417211839	0.0458123214932661	0.180542249419655	0.191202806749366	0.160967381725367	0.106989067012908	0.100128739108911	0.117949033390018
5	16	0.174250796276223	0.174527679179044	0.220784950464258	0.207231942329409	0.188557983431802	0.160933625747418	0.174250796276223	0.180497601746233	0.18707947385812	0.168845838608348	0.127620288783076	0.104757811810302	0.119036983762639
5	17	0.14303913264751	0.178550796183521	0.219241010962314	0.2071713788533	0.1910198737239	0.160644413917186	0.14303913264751	0.181304281696158	0.184278628332667	0.165490925553184	0.109664002723005	0.114896285336621	0.119679915431361
5	18	0.131748612131888	0.179929635541207	0.198277947096757	0.21117231706529	0.187322208130062	0.155369022257159	0.131748612131888	0.179238852272069	0.178634186443437	0.168783819231182	0.125717380026681	0.135909451325826	0.125882949662883
5	19	0.140149668557439	0.171372684979451	0.198435278306516	0.210987874848489	0.188927175438746	0.168477313439294	0.140149668557439	0.179175506804125	0.193062379355244	0.165086113032055	0.105648100604831	0.132710385568516	0.127960236089338
5	20	0.104950153791395	0.169347493308859	0.176604236321205	0.221563755390063	0.181861057828228	0.159556624729396	0.104950153791395	0.174721737156838	0.182524358106902	0.167094944647953	0.126236904976815	0.125574665460319	0.1253493440744
5	21	0.108626082989859	0.168291445783235	0.194364165993905	0.223538267002164	0.179268140037439	0.160007313275553	0.108626082989859	0.178921754902371	0.188383052461087	0.169289906367375	0.112216967689457	0.132864254702093	0.132780739825771
5	22	0.306683554860521	0.157894555351484	0.172386530817195	0.216895026810805	0.18291832853023	0.154658209829007	0.306683554860521	0.180923980671183	0.184208032603779	0.169612495615158	0.102218406729595	0.138262637485785	0.143875864659173
5	23	0.182626552084893	0.20262046884042	0.173737149995015	0.217221122046604	0.185468482945823	0.157483618036924	0.182626552084893	0.176623616690352	0.180332266121625	0.169719935302944	0.111645952341216	0.135095320215607	0.149613595342015
5	24	0.113951461231845	0.188981264651499	0.172597045242864	0.214850336611369	0.184390912874809	0.163826145335398	0.113951461231845	0.178138232594976	0.17738075814621	0.168033215523288	0.111665426228217	0.132550552821862	0.155093446026116
5	25	0.157975037946015	0.167685972895502	0.181370292342926	0.221169791934194	0.186171881327122	0.160428019341073	0.157975037946015	0.180413959387727	0.183805793313054	0.165948855560523	0.125148945697437	0.14428220885924	0.155897407307031
5	26	0.220950779636265	0.156357744591902	0.177398868970135	0.217594138345204	0.184240875946435	0.152679028487845	0.220950779636265	0.180112298085042	0.179743133063836	0.14938115210869	0.148174797334781	0.135721698247352	0.158351464548984
5	27	0.187289888611974	0.137705459540598	0.182166695207797	0.226018630461595	0.189110344360001	0.152650774802907	0.187289888611974	0.176713306781358	0.167866525417825	0.139549435196236	0.142011573621783	0.120343166233175	0.148208980237934
5	28	0.187115586227806	0.100402011883818	0.186389888810309	0.210141339200708	0.181710315503687	0.157629796554047	0.187115586227806	0.18141809207124	0.187575392068439	0.13967867315137	0.13074281948021	0.12455471753142	0.155499730445757
5	29	0.176180026780109	0.0949449900860609	0.179984522082959	0.201506584449823	0.186231121042238	0.152348480670334	0.176180026780109	0.182404825738737	0.188397505844134	0.1556045202159	0.128639692272686	0.111186276788304	0.145892093692464
5	30	0.160987718012166	0.0790336454913997	0.181640519169403	0.211092954792	0.179988450166659	0.150984064589399	0.160987718012166	0.176891996071826	0.183072936516867	0.135283836579839	0.127051477202872	0.106282860947079	0.163706428248438
5	31	0.192138916191999	0.0890656454244788	0.180112416181215	0.220858861123134	0.181124263948937	0.151757878067588	0.192138916191999	0.176657944755732	0.195336222740856	0.130859266369581	0.134474022428072	0.107644437399106	0.179778657888214
5	32	0.180589758034916	0.0967877704908394	0.187517999036379	0.2112077146234	0.173823319537143	0.155934581863643	0.180589758034916	0.176401486495942	0.176264838919038	0.134423202533018	0.138342799707364	0.105120675435197	0.17312368568178
5	33	0.180820895397576	0.0992809069568794	0.192993713214562	0.192064080965719	0.178685074004135	0.148536042735246	0.180820895397576	0.176565862089374	0.170479728098018	0.134083385042834	0.129334528276812	0.108212609466118	0.174095879351415
5	34	0.186108546516249	0.109969288748445	0.199875939961348	0.18334527010551	0.185739714228844	0.180218540405189	0.186108546516249	0.183126510119291	0.182236400137802	0.130925592681171	0.137275208904705	0.0838800012678445	0.173936713426787
5	35	0.173723005252849	0.0681220177822328	0.204882747637847	0.205516145136438	0.180009596613087	0.148455480098942	0.173723005252849	0.177701789471568	0.187212664231587	0.132350697033277	0.140166992556028	0.115237114062506	0.170479301411659
5	36	0.158973974564134	0.0450700554736328	0.215387862537838	0.222793505726011	0.187227840093433	0.144707011103784	0.158973974564134	0.180406975496792	0.174855689766071	0.133128684796395	0.130706473927356	0.0813426844690443	0.164289518928415
5	37	0.175903190191577	0.0559089078745616	0.203664758281698	0.220808187407347	0.195755915256	0.154278924203759	0.175903190191577	0.179033205871837	0.176766040177152	0.131023126414374	0.143940534289098	0.13913798354832	0.158979022858354
5	38	0.170371524630971	0.059232333102617	0.209836693534511	0.227008748605257	0.199565868645536	0.162918037693922	0.170371524630971	0.173810996412337	0.166608514288476	0.128582763498782	0.144707006302855	0.125578710471457	0.162972224835784
5	39	0.167495027578311	0.0427992917271849	0.201620287611958	0.227767808996522	0.210519474047716	0.155954760980923	0.167495027578311	0.177665147831163	0.180705921192552	0.128130991690608	0.159529733860874	0.136325319674631	0.175313158389141
5	40	0.169566469644409	0.127056078494105	0.209943287077716	0.227398853827641	0.204309311556598	0.149072811125427	0.169566469644409	0.174654908375818	0.163841888762212	0.132159671038646	0.157252803810669	0.149419655501795	0.161972115546991
5	41	0.178703746087028	0.106893561354649	0.195478185830177	0.231100961476116	0.210158311372253	0.146382745204622	0.178703746087028	0.178299921161305	0.158331824616341	0.133187611338242	0.141805538041949	0.139885585788391	0.172918167999106
5	42	0.160308432444764	0.101714575680065	0.205153767502915	0.226022772329443	0.207877912125261	0.147680629701035	0.160308432444764	0.177307185163557	0.158931499173573	0.131956913360723	0.126411361262589	0.134197882979559	0.172391299902063
5	43	0.164282101991792	0.0110442543079783	0.198101408011555	0.222012574037826	0.202024162762606	0.161539386293388	0.164282101991792	0.177805622203363	0.170635753854692	0.127855411215142	0.136282654506255	0.141542147311405	0.172940319767865
5	44	0.174818238310692	0.0717547507677025	0.198510133326957	0.230518052881756	0.197595396651438	0.151968156564407	0.174818238310692	0.173448403472922	0.158300319545706	0.133347873088804	0.132048340983568	0.126124140411394	0.184324149139447
5	45	0.202156141095414	0.0326024027827821	0.207774462379615	0.222016225886292	0.208120131267215	0.141938856338686	0.202156141095414	0.177717203885043	0.164627660579119	0.126396606142784	0.136635089387972	0.130763396909739	0.195835765735298
5	46	0.189179428429025	0.0490385066496164	0.204553602321343	0.211378158591696	0.20433661467762	0.149180578466673	0.189179428429025	0.174824175175924	0.160395143477846	0.12890688971093	0.141454144678295	0.129978839544252	0.194250608792783
5	47	0.194971525815226	0.0875956166865518	0.182729672177748	0.216051282048319	0.198796349786763	0.149956393115467	0.194971525815226	0.173631032206558	0.154931098293021	0.132387333061319	0.140996657805316	0.120456090207249	0.197096906672153
5	48	0.186557138834457	0.0891692490895092	0.192019713678554	0.219859232013757	0.204863865094937	0.151834497873688	0.186557138834457	0.172052548799315	0.162617350960245	0.134379486344227	0.130534455353633	0.122265506885837	0.202357669189806
6	1	3.33877892401308e-05	0.120900411690659	0.202130447294799	0.208252892472849	0.197720747688823	0.0575146178190157	0.188639430701021	0.179281882046274	0.15681425842152	0.166462859548574	0.0972296427284414	0	0.0575146178190157
6	2	2.245942143792e-05	0.0918734393412388	0.223150380984637	0.205485968770039	0.202689148279286	0.0682725471017588	0.191576542151322	0.194645315946044	0.156282606775294	0.148878399916104	0.130704900230714	0	0.0682725471017588
6	3	2.51931202456968e-05	0.105870602409611	0.218599676529454	0.20964641659382	0.208334485574394	0.047409420592915	0.177340964085021	0.186672845467825	0.151991440759455	0.140812947654614	0.0967161788989511	0	0.047409420592915
6	4	8.30511914227615e-05	0.146658333968582	0.198804872135004	0.190141936260154	0.18319683507025	0.0788162705273651	0.192506508707509	0.201655714666051	0.154520178566392	0.146271251806496	0.0159005358893907	0	0.0788162705273651
6	5	7.62377546415749e-05	0.143646152236709	0.241277119560122	0.200564267421986	0.19409513917816	0.0448957306903256	0.187925734391649	0.19972737721461	0.156799016279182	0.148855906969183	0.025178294918251	0	0.0448957306903256
6	6	0.000101342897704832	0.0844214039997493	0.217697559173296	0.173317414488649	0.194503994900458	0.10462560164485	0.180691021403165	0.19927868725412	0.152454622095269	0.145983205386444	0.0637568334914509	0	0.10462560164485
6	7	0.000129678806566839	0.0712916651538268	0.209936890181128	0.203690821206108	0.186387440576373	0.09090492006795	0.180971428173626	0.192964750643346	0.156984139615649	0.142412113175774	0.0673755033856724	0	0.09090492006795
6	8	0.000121790720441031	0.117971909919551	0.223680690734267	0.180981525127376	0.203306959110835	0.0396395161632592	0.183295560021192	0.187990886691445	0.152352707658136	0.145526688741898	0.0400352708404837	0	0.0396395161632592
6	9	0.000152123750757042	0.0894880464314298	0.233957109332113	0.19974332112045	0.201292347582721	0.0935223558542456	0.172584288617618	0.184117018274398	0.158236692143963	0.148825790384261	0.017488074302888	0	0.0935223558542456
6	10	0.000152689858760171	0.125499601068489	0.185037006689104	0.202826259021533	0.199966052928555	0.102759980780953	0.173916795419643	0.176290798247837	0.153738012051244	0.145735587600535	0.052703349233108	0	0.102759980780953
6	11	0.000152850016278141	0.0871486590677189	0.212484863928882	0.19835616760536	0.186465935562517	0.0692513018597097	0.167405830515568	0.17717148596234	0.16247329310201	0.151222131231377	0.0408642281676058	0	0.0692513018597097
6	12	0.000174294594784391	0.113926260677128	0.236619683033152	0.204935248387675	0.191080636649265	0.0626247101653614	0.170191980004274	0.189864647764085	0.160200183546335	0.150591086573521	0.03884115652814	0	0.0626247101653614
6	13	0.000161542582121128	0.0656899255757896	0.273780493770246	0.207594496846736	0.201873919440859	0.129230524623678	0.15875265165199	0.196625720457899	0.161426716958333	0.1525963544093	0.0308926148694108	0	0.129230524623678
6	14	0.0249336096551432	0.0840387166818584	0.218796822332245	0.195478141203533	0.199713470420697	0.0247619087505845	0.156404321548843	0.199643430036657	0.160873251798244	0.153350548177824	0.014996194204952	0	0.0247619087505845
6	15	0.000157078585217897	0.098927909592125	0.21876173542454	0.193509361542182	0.19961885779315	0.052432594486498	0.155517883311102	0.188517701376547	0.163204719845584	0.151384924086722	0.000124358317235711	0	0.052432594486498
6	16	0.0237645984070177	0.0889817219903718	0.219722619260856	0.21249843379862	0.202918978075186	0.0985065365240657	0.15843329680603	0.190984630970984	0.162253733659278	0.161070997018322	0.0166108888112525	0	0.0985065365240657
6	17	0.000183752351062428	0.0437223530077285	0.21273204674916	0.216162417379933	0.206380166318964	0.0425203629664278	0.181508218312967	0.199126936204494	0.165414961770984	0.153393284462726	0.0508574185862869	0	0.0425203629664278
6	18	0.0195722813378191	0.0953731390022986	0.220958319175458	0.20546956725664	0.207247485412134	0.0383500088189801	0.175128832414028	0.184953912588744	0.169195467626403	0.156325762885033	0.000123564771407001	0	0.0383500088189801
6	19	0.0126551123923145	0.143214727923172	0.214853810453296	0.223965230910056	0.20056740329078	0.101795993807336	0.177531110448613	0.201584852263955	0.168632245326884	0.159474492379079	0.000125172464465396	0	0.101795993807336
6	20	0.0166360532827817	0.0559353563095648	0.213823863154384	0.211901880254205	0.195560421810086	0.0398023215828711	0.18815693507412	0.188663537543008	0.169189819736056	0.158940075624549	0.00757270584591933	0	0.0398023215828711
6	21	0.0390240727364967	0.116142123512663	0.223050237833464	0.204655548776046	0.203525928279768	0.0780668319706836	0.184949005618044	0.176350105027835	0.174700913261439	0.161375055151404	0.0267528700539036	0	0.0780668319706836
6	22	0.0111742774611669	0.129444139227856	0.214807312508653	0.22053499952113	0.208750656155888	0.0292779679413246	0.161653080773218	0.186353104958919	0.170268768311683	0.156847939027164	0.000142104014114359	0	0.0292779679413246
6	23	0.0424766206424521	0.103814419991422	0.239977858581957	0.217042759252652	0.204558360884401	0.0966932915772408	0.164685693997244	0.18791807464815	0.173966413419613	0.159957658371445	0.0255529753114688	0	0.0966932915772408
6	24	0.0702605065531808	0.101917849562473	0.21637788442175	0.225286282202107	0.210202230879119	0.100926086692208	0.150381941166821	0.189863241282215	0.180174726508266	0.147175872232526	0.0244633356845783	0	0.100926086692208
6	25	0.0848797347034904	0.0685880479676236	0.207293638922519	0.202188202140252	0.190422696223985	0.208678209464216	0.167303737593964	0.185818080194522	0.179309667359553	0.154877056892739	0.00013926433575095	0	0.208678209464216
6	26	0.0207323861344042	0.0869056256250457	0.216110658851098	0.214770972198356	0.208454193173892	0.246688499921454	0.168309188359983	0.192188690763894	0.176158539267769	0.156565191700737	0.0183711995726429	0	0.246688499921454
6	27	0.045578550467495	0.0303864762336058	0.210704003301389	0.204826978018799	0.179194832217595	0.100438974469745	0.155056249852714	0.177454476142759	0.184266501616692	0.144070409202697	0.0132961283981131	0	0.100438974469745
6	28	0.0922511003559391	0.0205908116385038	0.209648148318	0.216948732689771	0.202863112009659	0.161977957176122	0.168009526068531	0.187871475818874	0.175453234455581	0.160210229899089	0.000180668853601073	0	0.161977957176122
6	29	0.0151399020621574	0.0186627826769042	0.224577527962777	0.209911611983417	0.200602381880364	0.213860801046011	0.168338366726941	0.199059565406249	0.178235388526077	0.14781800342063	0.0132824214538358	0	0.213860801046011
6	30	0.045936126857054	0.00237420818413938	0.20873879443918	0.21229460082205	0.19871489041813	0.194996287573794	0.165528626041227	0.165764457540511	0.169815234719687	0.142722784381843	0.000191650162698337	0	0.194996287573794
6	31	0.134563350303131	9.99863915373966e-05	0.201681319460238	0.219523853536654	0.20254228899429	0.184744911399615	0.155912895199712	0.144395749170332	0.177775594323871	0.144246714835685	0.0163325881697499	0	0.184744911399615
6	32	0.0778511389255491	7.97957236106227e-05	0.258380526082119	0.21926108548687	0.210643822301602	0.223194229364935	0.160308692535402	0.148590787003863	0.173040125693278	0.146553485491796	0.0334604614648533	0	0.223194229364935
6	33	0.0542401856878336	8.7656527802529e-05	0.215898755876765	0.209572311865644	0.217707332115378	0.161920484362564	0.164671772659936	0.150015875289008	0.163465288730583	0.144603429327526	0.0293005221512241	0	0.161920484362564
6	34	0.060979967355228	3.56689367913222e-05	0.22014951119352	0.21940045477805	0.207083980916494	0.225210720669655	0.160488729133182	0.155225615871831	0.163249457743399	0.141974390671972	0.0250355506403109	0	0.225210720669655
6	35	0.0839381825342214	6.19675547058373e-05	0.161875605021609	0.229737009801504	0.219825269369457	0.156450038904217	0.154532442439222	0.143319233751922	0.165853537594243	0.131078924214089	0.0001718217996979	0	0.156450038904217
6	36	0.090631139018207	1.18974817760201e-05	0.222809517224338	0.215446259737646	0.171260700252945	0.244175706189728	0.159203123733679	0.161089717091338	0.162154134758265	0.139948213615891	0.000176486566115937	0	0.244175706189728
6	37	0.0617047148598155	2.25753058624272e-05	0.243871730864953	0.205689671066854	0.211397756926297	0.210387380661888	0.159284569994972	0.151350636884634	0.170455536030997	0.141670464657962	0.0294330674703901	0	0.210387380661888
6	38	0.0794901261669638	1.67432951527728e-05	0.24524494879937	0.216025893431298	0.193067204546412	0.246618049524477	0.154412829424937	0.141556032417491	0.168664967852067	0.136930295242804	0.015637261084185	0	0.246618049524477
6	39	0.0953975363585493	1.92828729137813e-05	0.225381272774281	0.215683625729541	0.212842440346347	0.228077052483388	0.161537172672227	0.158784872340635	0.152119993290967	0.151128598932015	0.0107347827869924	0	0.228077052483388
6	40	0.0813941144728297	1.45461527571356e-05	0.239112582587683	0.211434781614605	0.206054611949555	0.119699546041533	0.156108125154323	0.143639432903915	0.14724418861676	0.149105991469638	0.000164842282265523	0	0.119699546041533
6	41	0.120791480758597	1.69251990784057e-05	0.187463932787068	0.217382490663989	0.211575244026388	0.146294688823625	0.163296585619961	0.156605742956133	0.149776234935018	0.121979792945296	0.0215407478592435	0	0.146294688823625
6	42	0.095509727004981	0	0.221185576291293	0.211337481418141	0.194631624044655	0.271401935362541	0.168922725930277	0.154140384374114	0.162007572116024	0.133075709932615	0.0265644160447765	0	0.271401935362541
6	43	0.109793231470032	0	0.198279934382125	0.207421091944511	0.210860173493415	0.212825338824099	0.161804948770254	0.144922652112225	0.146062186666841	0.137602149620645	0.000140160767598601	0	0.212825338824099
6	44	0.147109878415212	0	0.206796046331642	0.218676657568841	0.218028702321385	0.205055854903562	0.160662405799427	0.161324717708462	0.137393394222905	0.134837086217	0.0168210160258847	0	0.205055854903562
6	45	0.126578833626298	0	0.180654720139873	0.193403352118188	0.203780819032399	0.195510804125978	0.168172130147963	0.169137719405896	0.138251845877108	0.131617948722339	0.000133089353687476	0	0.195510804125978
6	46	0.113178846726567	0	0.228591132514374	0.202889308310413	0.212493156863128	0.165127096491698	0.166492890411229	0.156789978507966	0.138533496958544	0.14244275196961	0.0318302795559573	0	0.165127096491698
6	47	0.132708772085517	0	0.167913961902673	0.222773302980017	0.213825627399072	0.22470583993664	0.163445350307363	0.14586478107579	0.137242321592666	0.121956432105377	0.000143455471783102	0	0.22470583993664
6	48	0.0863808709237316	0	0.153454195362278	0.209163673520861	0.20691614877971	0.229686721875762	0.164836272888063	0.160626635488182	0.133435832037891	0.138903435406312	0.0138856394440229	0	0.229686721875762
7	1	0.00276421542855199	0.311911864474173	0.320765261765463	0.290953371494762	0.271820388729131	0.234573856062985	0.00276421542855199	0.224811975909123	0.248424691866949	0.203930580331519	0.166442167903651	0.15768482602151	0.149468879094698
7	2	0.00451768940890698	0.277499288601798	0.315544253950667	0.285701729970169	0.269981311839142	0.24022250767492	0.00451768940890698	0.226977334471942	0.258102965990155	0.20198199283224	0.170532409277919	0.167756324411898	0.139427105211999
7	3	0.00625805960105682	0.279876340396963	0.319537608310806	0.286086383215563	0.274819027515751	0.239056057224797	0.00625805960105682	0.22786538106263	0.252773338185371	0.213732493381282	0.166557193843085	0.173147685207125	0.148201099834687
7	4	0.00998901422710077	0.272190023172523	0.320875341240755	0.296202460820424	0.275149190647713	0.25150205797681	0.00998901422710077	0.232242839851279	0.260464863885058	0.210545857905111	0.172850955444737	0.163709933354811	0.144999682820305
7	5	0.0118519348241418	0.267556661478239	0.328230814774488	0.291353017909724	0.274952487641764	0.254045808795594	0.0118519348241418	0.226057867250744	0.251777266866896	0.207054455888244	0.168272457453845	0.153206134547662	0.127769022725855
7	6	0.0138091753708149	0.277740983443326	0.325826087164808	0.294004249059237	0.270101653053195	0.25236267220826	0.0138091753708149	0.224651963090448	0.246927072352721	0.227221735945176	0.171022421031745	0.155588307331243	0.150851823875122
7	7	0.0147461700769575	0.267520797681138	0.327606276157164	0.291804456162654	0.271112275880368	0.241138503270728	0.0147461700769575	0.236987184360602	0.238855725738733	0.206249751638674	0.173989380083299	0.150752425830399	0.157135893918535
7	8	0.0160515874994651	0.275162905304433	0.326690357057748	0.282584327096555	0.282688560689229	0.257310490726516	0.0160515874994651	0.240818780716126	0.236038225065549	0.214601269223536	0.168167082866759	0.157405975817581	0.152953679221562
7	9	0.0163320481568427	0.307665390691642	0.329777074864028	0.286236826672663	0.2777911614649	0.250000774762266	0.0163320481568427	0.236488827401916	0.240749509875385	0.21553344683081	0.168146324656462	0.159692420326677	0.166267276694918
7	10	0.0163010000889478	0.26972617047003	0.324561666033122	0.28388046082667	0.268932297880866	0.250616280083907	0.0163010000889478	0.23015445881594	0.23908352551047	0.227216817553992	0.171157018043436	0.154263265130249	0.160982544298255
7	11	0.0169505556391788	0.26648487266747	0.321290708632309	0.295631752272968	0.283452919426207	0.250289514555767	0.0169505556391788	0.237039691807678	0.248599784520442	0.212101283897505	0.17050640123685	0.156025796257278	0.155739542109933
7	12	0.0167734643534269	0.273102172285053	0.333845183498297	0.285749377916261	0.274852736603717	0.256017435723558	0.0167734643534269	0.234727987710227	0.245313615111649	0.203337202647194	0.171585063081251	0.156032429081882	0.160129686359661
7	13	0.0167544527285446	0.284588372463669	0.330840202909782	0.288127463595675	0.279312449373111	0.24933156975852	0.0167544527285446	0.246862798824983	0.247086095596493	0.207649867131729	0.169788036757179	0.157173658607139	0.154467760245604
7	14	0.0161717716143182	0.273476408687525	0.337147737737729	0.283870778407934	0.273332476387763	0.253416555613706	0.0161717716143182	0.231681629085983	0.25035115965942	0.21210122979168	0.170114076939202	0.153615015155038	0.161962428021147
7	15	0.00815473141134146	0.265493280663402	0.329890192050657	0.29657108315765	0.276903236224546	0.263562735332532	0.00815473141134146	0.24563495131944	0.248497989896405	0.209254475177769	0.168962889323878	0.163688706504365	0.154655629775557
7	16	0.0229283861436039	0.262086715999354	0.344675436524842	0.29696636718548	0.276368889940135	0.266927294980968	0.0229283861436039	0.240032232387319	0.242990185639784	0.218734719914639	0.166564913096446	0.1541671426723	0.156328797222222
7	17	0.0687949247659862	0.263454679638721	0.324933595863036	0.299141942342	0.272628092511483	0.265088025953438	0.0687949247659862	0.243603476154582	0.25356796033517	0.210214888918137	0.168787613692189	0.156929835552398	0.148291866460452
7	18	0.0491125175695217	0.275534989597909	0.334890154775507	0.295230938717719	0.270263458531192	0.257522666549461	0.0491125175695217	0.247548624946333	0.244814939734837	0.21505301269914	0.173334326116076	0.150307586250212	0.152651813158684
7	19	0.0135322834236521	0.315519044351841	0.334621551362031	0.297838487573914	0.276480537173091	0.272857250606411	0.0135322834236521	0.241891193051448	0.24791918876338	0.210778454020868	0.169010939966135	0.151181851639761	0.157427259986639
7	20	0.0680737766449773	0.262763370276635	0.318483152532519	0.294631002284077	0.283577401128154	0.267080340631083	0.0680737766449773	0.236983704232135	0.242738438291275	0.208935813582846	0.172104916336236	0.153828744783107	0.154607571642631
7	21	0.123036094248889	0.281910808803152	0.300191597578288	0.293930747781514	0.27551576628965	0.275932816978163	0.123036094248889	0.236666032445061	0.2486308906284	0.201061807782006	0.17630044012211	0.153985852239655	0.161241268999672
7	22	0.0961937384447651	0.271371398178289	0.332233655900626	0.293050614293064	0.276495790356662	0.279152829840401	0.0961937384447651	0.254975015333783	0.242350023504852	0.203841663949324	0.176123323679804	0.152395681838692	0.153098315014303
7	23	0.0437747486628276	0.285700960713606	0.341591364765392	0.297859225091529	0.272716808279709	0.275273743047757	0.0437747486628276	0.247430167674586	0.240188198280785	0.191120633710727	0.17764107143882	0.157515640965624	0.14912690800917
7	24	0.0941253407558895	0.30510969011579	0.329731175259036	0.293507061303001	0.271139003189775	0.273525307980613	0.0941253407558895	0.240979815877183	0.247891624295431	0.196862006997217	0.17165946283925	0.144795997083492	0.154176491186749
7	25	0.164962852135388	0.302138471571392	0.327478530251053	0.301417129230679	0.278816666456788	0.280990184730857	0.164962852135388	0.239837653383232	0.233154907676097	0.184920260462106	0.172857442721073	0.155348887298233	0.166835906483047
7	26	0.099943645599195	0.31958484955651	0.300788535540133	0.295713804030712	0.276346793815306	0.275561775547423	0.099943645599195	0.249145924557874	0.247325290972184	0.21066706191857	0.166992259318421	0.156907001730572	0.153770398178274
7	27	0.102968162107851	0.320407408734499	0.316429092870906	0.29795401759415	0.274764816014278	0.277122221318779	0.102968162107851	0.257946274157331	0.242058688913224	0.197793415987591	0.164454155440962	0.155525580391185	0.155169309898792
7	28	0.210661552710384	0.311651761905379	0.330653075629481	0.296826735993555	0.279869854393524	0.279014484992778	0.210661552710384	0.252933837454813	0.258240954277566	0.191795153684604	0.16902111126899	0.158053130907376	0.152644472575045
7	29	0.232745399318778	0.322586886243068	0.314924101189088	0.298411379165516	0.281870517570004	0.280973087097042	0.232745399318778	0.252527710468248	0.256894422153479	0.191862531469681	0.163968804695824	0.149530924416528	0.172536098682169
7	30	0.170463636487974	0.342105849488988	0.318315265573088	0.304565532797412	0.284396135037397	0.269631989521641	0.170463636487974	0.259301816286411	0.246132756794456	0.192349555836928	0.162348542775622	0.159987575312456	0.166071504519076
7	31	0.26313662490405	0.320361876997179	0.323941282851494	0.298105547958559	0.287101319914266	0.278466979646877	0.26313662490405	0.257672096640905	0.244528832488305	0.182180790366189	0.157828224357697	0.149711831467068	0.1658896905613
7	32	0.197649470432852	0.317618687983862	0.324032864985188	0.300060289567743	0.283530723668883	0.277262212616721	0.197649470432852	0.252456218755839	0.233629447208804	0.183717410314266	0.16270422825965	0.154581863873731	0.169489031055703
7	33	0.167628827534663	0.30799959429833	0.335759915558586	0.300143780709895	0.287796308271628	0.279427691028042	0.167628827534663	0.254125670632915	0.227744851922086	0.194040248645654	0.167682408820577	0.156916372008579	0.173979220240831
7	34	0.278694353941822	0.310013617095809	0.325955589293088	0.291592331023807	0.284617898387063	0.280354127802791	0.278694353941822	0.247716813834782	0.217889369686556	0.179278220638353	0.169279206044249	0.148676232444802	0.177715588122891
7	35	0.301304265893762	0.311158226178142	0.331304876594247	0.297494336220139	0.284937190275789	0.273412561946762	0.301304265893762	0.242665664774615	0.222842801687205	0.180426450323547	0.155962322748734	0.14667472098887	0.169724546987279
7	36	0.278833143250285	0.287928893474529	0.320893916484344	0.296320553645166	0.290499896786524	0.274999647494889	0.278833143250285	0.251860381771587	0.2381201730205	0.17904938781055	0.160736772275255	0.159745259247576	0.179478129918264
7	37	0.28372489218282	0.29804618490924	0.333477759648861	0.299299842359862	0.289232452999913	0.281778769972957	0.28372489218282	0.254521064494012	0.228765011924018	0.177795566430091	0.161317442053254	0.147130961562421	0.184807606096369
7	38	0.234812976593883	0.295712972102151	0.305762255406213	0.300452299726332	0.282815910882778	0.27249453327744	0.234812976593883	0.246021062383384	0.232698598766691	0.185629808635358	0.160228452134556	0.147971933344854	0.200175518456128
7	39	0.293346142980103	0.282225110230845	0.328102078484122	0.298141411896235	0.299091835238949	0.275843812761497	0.293346142980103	0.250348460655957	0.232399612190346	0.179492932011344	0.157768960114227	0.155162407667483	0.199693758181785
7	40	0.298795047323957	0.295925873531724	0.32495562463715	0.303464061118994	0.283716981501458	0.272250969047543	0.298795047323957	0.24502653366358	0.230271188374305	0.181211552796316	0.158828793926313	0.149735702821055	0.193044550440298
7	41	0.288471472433404	0.313023635662635	0.339159736779695	0.301794847578379	0.285636118601156	0.274555558423526	0.288471472433404	0.248675221525914	0.230118883466326	0.182108052425302	0.158278468686531	0.153371344407904	0.177967217300551
7	42	0.277062158858598	0.338100713014439	0.344377732856373	0.300986087506633	0.28746156472868	0.280055987904457	0.277062158858598	0.243181382242949	0.241664211376375	0.17666826163543	0.155827508015186	0.147544866672966	0.178957571661596
7	43	0.26739226377295	0.33457215640437	0.328615038393685	0.300819274259381	0.281839265592362	0.253139170191797	0.26739226377295	0.235631100926959	0.23510139884597	0.175287900870246	0.154719610540436	0.14996810910229	0.181355661802364
7	44	0.294591248112631	0.33616617140448	0.330038537093389	0.302006218468328	0.289911485964115	0.251440967394559	0.294591248112631	0.240975208023723	0.231855621433838	0.175297382222636	0.160722168996233	0.142687190966069	0.194392358820977
7	45	0.294924580480144	0.351008760484741	0.317805372969137	0.30099618915122	0.289284793652323	0.247259933849462	0.294924580480144	0.244707620943632	0.224661879315507	0.181373478214248	0.161114916353308	0.146018547269168	0.205440959091714
7	46	0.325106040690888	0.309162114937651	0.315200099742913	0.30526552086117	0.286681275729568	0.257412442133627	0.325106040690888	0.24466528152384	0.237592946842772	0.172883978607974	0.160380422484113	0.154902100725651	0.203963140352558
7	47	0.32805624248595	0.29424372980752	0.314126818446561	0.300605029387998	0.283139073607821	0.260725957262844	0.32805624248595	0.23293733351354	0.225549461397341	0.178376440863231	0.153101678350184	0.136916088145926	0.199034107569372
7	48	0.329605487569494	0.230130901934541	0.315614686323055	0.303254729671493	0.286059574404675	0.253627457461742	0.329605487569494	0.233055277986693	0.225829920309828	0.176688338237693	0.158640597066552	0.13106982425964	0.218062288374647
8	1	3.56541829397939e-05	0	0.19767017681998	0.159921356256718	0.15927732219333	0.159758168373615	3.56541829397939e-05	0.198560521184831	0.193287934951338	0.163972583333753	0.148499394064368	0.160695466203484	0.177454147169898
8	2	0	0	0.195396113078961	0.158832485667682	0.155478874784848	0.177110747242213	0	0.202659266183139	0.232729601476726	0.164774183395645	0.14402117602163	0.14145478004238	0.173694983912002
8	3	1.67356700353632e-05	0	0.191226033084287	0.162520080623726	0.165452445914616	0.178580314340469	1.67356700353632e-05	0.21502030958173	0.222448789468777	0.176025282956554	0.147487553010771	0.160432153896234	0.157334844486016
8	4	7.71754251025285e-05	0	0.192572025925636	0.157739931009369	0.163048467879583	0.173088816294498	7.71754251025285e-05	0.227388239451416	0.212601394439466	0.165297214848404	0.151412911619661	0.142571941826186	0.166640539006569
8	5	5.91297100879388e-05	0	0.193807640950222	0.157759184460729	0.161763773424599	0.163782215051694	5.91297100879388e-05	0.220769503243001	0.228555322963772	0.175384369817953	0.150344218043201	0.156322629475404	0.167900288390222
8	6	7.88004093550943e-05	0	0.187616115710035	0.162981467251121	0.175518594706356	0.172748432445036	7.88004093550943e-05	0.211256229098124	0.191018258041693	0.177553564768003	0.156945827978834	0.15362156868043	0.16634452998846
8	7	8.25084015887839e-05	0	0.18722139494122	0.156246171964531	0.164750494317058	0.165825642694286	8.25084015887839e-05	0.208693979395291	0.195287150138418	0.184472250245687	0.148293114263256	0.135127233677629	0.173951486949916
8	8	8.91465317823115e-05	0	0.182800524330595	0.173727005932007	0.148507990704357	0.16818270248557	8.91465317823115e-05	0.207145385830478	0.229344653706345	0.17944476719112	0.146313156666589	0.158379277258392	0.153066498202401
8	9	0.000107717234074531	0	0.182168659848439	0.155176200744226	0.161343162462285	0.169595573823348	0.000107717234074531	0.197518010917575	0.196350031394182	0.177410971447021	0.153901153510316	0.141648282445343	0.153796216409931
8	10	0.000101871500083765	0	0.178717078005996	0.158267258816046	0.160580770101529	0.160670496322183	0.000101871500083765	0.201548603261955	0.219523345016298	0.175395724220524	0.155097752547409	0.163711963617397	0.178486417788814
8	11	0.000132459054774781	0	0.175747091497165	0.157233819855757	0.173580945940854	0.169746552981306	0.000132459054774781	0.195172645550295	0.192675573588372	0.161083717844391	0.148300596124795	0.162776192937682	0.160614432756772
8	12	0.000130081423644158	0	0.175607939370946	0.156163361900134	0.158578360756728	0.159633265182255	0.000130081423644158	0.200478886227851	0.202366266077832	0.176376407311239	0.146787054386013	0.141427790571125	0.148168527986967
8	13	0.000133137009960075	0	0.175225076315455	0.167475778865983	0.150575214421397	0.151713854909249	0.000133137009960075	0.184311316334191	0.199101362406772	0.168159270910211	0.160519314220133	0.162682567587188	0.156330975515303
8	14	0.000132014758090918	0	0.178166854011953	0.159926147907347	0.150438265035655	0.147220501385096	0.000132014758090918	0.186721940028674	0.19760174811977	0.174342651107885	0.148712255685151	0.157159026584376	0.150855835731713
8	15	0.000152563876854011	0	0.178415964538482	0.1585388769555	0.166828083040389	0.157368199035275	0.000152563876854011	0.181106927050614	0.186004356367484	0.172801505392072	0.146112727023422	0.166437606948592	0.168278020663117
8	16	0.00015407630544792	0	0.169308213729233	0.157288228492114	0.157036577904146	0.147590068539123	0.00015407630544792	0.191487795633699	0.193221908249578	0.170256244373761	0.145860281310714	0.167766832761834	0.169476065517369
8	17	0.000164948170747897	0	0.173862285224124	0.161097954826276	0.174721104268943	0.155093469252756	0.000164948170747897	0.190550471660006	0.224159923542418	0.183083514176315	0.15666937243595	0.160351437434354	0.167117990869133
8	18	0.000182281596825979	0	0.180967614810895	0.161812474278747	0.156595268229874	0.151017766498826	0.000182281596825979	0.193476918058872	0.218064929832786	0.17613959567087	0.156365989379953	0.163849440999965	0.16754832740522
8	19	0.000182916201049047	0	0.168511493179953	0.165018618985314	0.178643140159135	0.163655857454995	0.000182916201049047	0.187152564225471	0.24011710425412	0.174887392037178	0.142380797036331	0.146713761955818	0.165449218883178
8	20	0.000203605810744701	0	0.176080671652754	0.166714519036947	0.175927195485334	0.139704029697716	0.000203605810744701	0.198090981447534	0.227756622470089	0.163475726875156	0.14190243192775	0.167552356206911	0.169906081383751
8	21	0.0001987389752942	0	0.174852544637939	0.164413584109651	0.168872391003962	0.147838470870856	0.0001987389752942	0.196908784960835	0.210145349144611	0.167400125571574	0.156288765502631	0.153498255101079	0.170838819289586
8	22	0.000216443431540398	0	0.175547269792012	0.161526459451292	0.173055210059324	0.149251459995079	0.000216443431540398	0.196232303264006	0.22016216520538	0.171408139001295	0.145822470845484	0.167534718288396	0.169624412734086
8	23	0.000220540110430294	0	0.176237916193945	0.169066175501693	0.174307652812046	0.163504762482362	0.000220540110430294	0.196055024028285	0.218259388073698	0.15491730999593	0.151202662601968	0.168534245893218	0.167622388478785
8	24	0.000220228012184577	0	0.169268921838906	0.16171074666443	0.162075515600579	0.150785346492034	0.000220228012184577	0.191901044348616	0.196045761099649	0.163737107648047	0.142341133715284	0.174306204476894	0.16715948889404
8	25	0.000263249527339758	0	0.177089898426768	0.175620995628823	0.157957439101263	0.14864711236434	0.000263249527339758	0.201968189860851	0.205054880293886	0.155790063539107	0.148812787555065	0.169222676579716	0.171119256081266
8	26	0.000261327038454534	0	0.183770345812521	0.166357431381246	0.152524970643725	0.146402147758103	0.000261327038454534	0.197813193009154	0.207891706381663	0.143721784853402	0.154828556114901	0.170993879853539	0.165760524369934
8	27	0.0147158545691255	0	0.181823479143661	0.164442997304148	0.168866996612032	0.154398691748718	0.0147158545691255	0.198529237249557	0.207946774134777	0.146706278921145	0.144919193268045	0.164655129954035	0.170457247903878
8	28	0.0458029589517917	0	0.194260499706495	0.161921124473008	0.153204708490033	0.14900057247616	0.0458029589517917	0.196330389494406	0.201492402368313	0.147094006725032	0.15444449875708	0.170652438385358	0.168483359278589
8	29	0.000290041077577268	0	0.209677190726331	0.167414739267055	0.158100802546061	0.151507382947009	0.000290041077577268	0.192295471426142	0.202253885916107	0.146332095664492	0.139748252986734	0.162959875578763	0.164578682213861
8	30	0.0471048020527687	0	0.211168124566952	0.168355160200918	0.152780904383018	0.157540315062067	0.0471048020527687	0.198810359578159	0.199661864829305	0.142691874657664	0.138645787537324	0.161143689088672	0.167920042918209
8	31	0.0317724411878549	0	0.174588142560668	0.163556250189286	0.208449204678114	0.179426638358732	0.0317724411878549	0.199070787743885	0.201007229819069	0.148158701475756	0.140053363362148	0.169603782424573	0.173510773002226
8	32	0.018153122429592	0	0.193741530418736	0.168279032937823	0.184202459382212	0.19199310081238	0.018153122429592	0.201068192371574	0.187184545688985	0.141074254335116	0.138844083032157	0.18394973084894	0.168509961225302
8	33	0.14062446009081	0	0.18851404001829	0.169849426103841	0.206913703986864	0.18016520976983	0.14062446009081	0.192186995315817	0.189314539717775	0.14066071344528	0.137143334873457	0.174450787608691	0.181123584223434
8	34	0.154928029164101	0	0.172966549113601	0.170972063437232	0.17453048642347	0.194740756519903	0.154928029164101	0.192158485574701	0.201585086903332	0.139120682671497	0.146969227102433	0.187023895908981	0.184815965032219
8	35	0.22907310754552	0	0.177016106222682	0.169451525164576	0.159829168320532	0.185464583479741	0.22907310754552	0.194538100455075	0.193184549129689	0.140255623235561	0.140085543185361	0.172106392139012	0.178458782814899
8	36	0.216192761739747	0	0.186588676842801	0.199870922860001	0.15662463203533	0.190352874359958	0.216192761739747	0.19601090193882	0.191135832061029	0.140048701599763	0.121440147906906	0.174991301866419	0.167758999724688
8	37	0.112161561725443	0	0.173034199036437	0.246309011243237	0.175382090648568	0.17119759475991	0.112161561725443	0.198952801598399	0.192083271645575	0.138009810692873	0.135021956376155	0.171529590009299	0.17603114141467
8	38	0.224449052001658	0	0.173743773722369	0.214214848961202	0.15073647292821	0.19124716530221	0.224449052001658	0.202241349458513	0.188987501020706	0.140973013614002	0.147069392611663	0.169245908325982	0.137023459935696
8	39	0.266798296110713	0	0.190547985829651	0.228491131099238	0.142324813162248	0.196275116236174	0.266798296110713	0.202407715580441	0.190233463327876	0.139617869012113	0.139403171409698	0.177240741841765	0.145489156097731
8	40	0.206752370416284	0	0.240608448993549	0.217860556098033	0.160879174781358	0.17902897924384	0.206752370416284	0.199568598427236	0.182072387074917	0.138226957598675	0.156319439387252	0.183366727510065	0.160444773219827
8	41	0.220791301086553	0	0.235483830515701	0.211313307839451	0.143387113174219	0.191638833951249	0.220791301086553	0.193764843059514	0.17916098496787	0.139358274178601	0.135745415274856	0.183157866919076	0.158683259395515
8	42	0.262326316175414	0	0.000348088380900983	0.192941734753747	0.143287042971751	0.200703445088818	0.262326316175414	0.202332176100434	0.176811806851638	0.140691062745383	0.144268073179801	0.167874858089609	0.176262428316049
8	43	0.294712908438808	0	0.0112043317891496	0.199057217897271	0.153827341565448	0.191641977757825	0.294712908438808	0.200560082158216	0.178110263833875	0.15117930910848	0.143719805059182	0.185309585159829	0.166272296282387
8	44	0.237259884986175	0	0.000395077252942759	0.180782334855408	0.144641059495931	0.188755585355638	0.237259884986175	0.19304336054085	0.185970623515614	0.145673477280721	0.133368784855996	0.186205005660736	0.147933356031633
8	45	0.237106796002814	0	0.000404554003439344	0.184893931846752	0.142506021541326	0.186540441677307	0.237106796002814	0.202528138078855	0.180282822529247	0.149172080168762	0.140954595811472	0.181541116758231	0.148239507316827
8	46	0.179853675887978	0	0.000425694095534513	0.184709943013488	0.150915822059054	0.19465886260408	0.179853675887978	0.188557900295734	0.177674856050475	0.159758554650882	0.146481382954324	0.188038863471889	0.179124487087863
8	47	0.18731053821435	0	0.000409066961564192	0.196447934625039	0.145003891800763	0.178792696112939	0.18731053821435	0.201118075419305	0.175946823830661	0.154452420164737	0.144435586250176	0.174385340894861	0.127727908517747
8	48	0.171432265155844	0	0.000431031605524713	0.19873599426248	0.157553625494672	0.190091757064814	0.171432265155844	0.190333168065806	0.176739341844085	0.157295247925732	0.132229088378033	0.185927793554252	0.116552994311286
9	1	0.0111432570039264	0.183704581846117	0.182322859110589	0.194835644116279	0.152684432450169	0.0879555178761122	0.182627521547528	0.170399991739483	0.201314576651759	0.168115673291269	0.1046765688645	0.114766897038658	0.0879555178761122
9	2	0.0294803569638889	0.190262301772898	0.174062118979917	0.190513587824436	0.150014228061963	0.0783275796390096	0.178661882307527	0.161076784639335	0.188737432464689	0.183814921980644	0.104315090757839	0.117457110667316	0.0783275796390096
9	3	0.0516768807237842	0.207141204244876	0.185264006522593	0.187732114851932	0.162459919151523	0.0782405020816071	0.180760718610986	0.172442459579725	0.201946681491488	0.169876016291184	0.11075842084416	0.116187321102752	0.0782405020816071
9	4	0.0396716713127728	0.221910865280015	0.185154681592719	0.191773446901086	0.162635328107782	0.109960745517196	0.18678442161849	0.176671228749609	0.201558060784875	0.181564776689923	0.111248167439358	0.116128889900655	0.109960745517196
9	5	0.0553180464065096	0.211365976180861	0.187872005049126	0.193150932978347	0.169596180550023	0.112831103549748	0.193599019734863	0.174683380908821	0.183084679545295	0.168537258444304	0.108393909218982	0.11462095840741	0.112831103549748
9	6	0.0571599902367814	0.201517853705352	0.198488012895606	0.175921260776278	0.161261116013531	0.112485086303652	0.197664236070191	0.17178030158832	0.20296125795448	0.178002228905687	0.104093299905684	0.115474337049357	0.112485086303652
9	7	0.0622145486875465	0.220664809949409	0.195042676548607	0.179451994462079	0.167606490027257	0.0724996157615857	0.196144217733534	0.176384564366813	0.183414092623513	0.176850549395974	0.112728817562113	0.122897142034935	0.0724996157615857
9	8	0.0445686951116193	0.184556921923983	0.183385943202348	0.182796165361851	0.166412761393986	0.102774535253953	0.193966172820403	0.16553382950193	0.195535419120507	0.171961691763762	0.121638132609503	0.113227966436047	0.102774535253953
9	9	0.0426709116222431	0.181357672094453	0.178311859118692	0.187673939196253	0.148755614328639	0.0786346060591402	0.192490974121442	0.167390977087432	0.187653421519574	0.157839419340862	0.120908668399599	0.115216675286057	0.0786346060591402
9	10	0.0388006010012025	0.245043203635367	0.175844255860657	0.202628721840395	0.163517861637451	0.0903837310587507	0.19677920436526	0.16880758569792	0.184232179536716	0.167288310310288	0.136000341952345	0.113022872890009	0.0903837310587507
9	11	0.0371111356779862	0.215390207164025	0.194435408310562	0.204720155703027	0.168982441632581	0.0680776404945493	0.189762533929268	0.167001223896805	0.181433808365448	0.161168010462517	0.144321213908217	0.109468696522183	0.0680776404945493
9	12	0.0907906760831048	0.191170072323003	0.178060439062064	0.200309776840608	0.179152312038831	0.0712347070604858	0.185265017911294	0.16742260525093	0.163740151413677	0.18238572861365	0.116799647079385	0.111401568115063	0.0712347070604858
9	13	0.0661358351696718	0.209751267968342	0.177128277214761	0.191067397687858	0.174360322516809	0.0850061109486377	0.188929169647325	0.169281122866223	0.160436972791937	0.15415978423001	0.141182142933452	0.104661275587943	0.0850061109486377
9	14	0.0545123146528095	0.196037315256474	0.183399784599121	0.211614080870299	0.17163826936534	0.0801507499253106	0.192060895596348	0.168899361377846	0.169439888643363	0.1456341997461	0.131979509479067	0.105509944796044	0.0801507499253106
9	15	0.0625708727224498	0.193297644200862	0.180798378254343	0.195508684789636	0.155444780406623	0.0858836654727101	0.19331806701303	0.171226070289123	0.167409294761881	0.15027145017222	0.134576216730004	0.102403811101218	0.0858836654727101
9	16	0.0712622753204801	0.163120403269077	0.177894745401222	0.206219732312885	0.167236161820044	0.0809208518207281	0.185498303326835	0.173289189527701	0.172748685747847	0.140446684832513	0.113480063584496	0.0983692973158938	0.0809208518207281
9	17	0.0742596063907408	0.129438138714671	0.182436604103807	0.197256964484657	0.17346173193831	0.0843196815808065	0.183801776797618	0.167728298686115	0.175899806915522	0.149231174928678	0.103868611009	0.0965186147539119	0.0843196815808065
9	18	0.103672649089355	0.123577752192042	0.204200958966239	0.18622399099804	0.172376318965763	0.083309871814141	0.164171537475401	0.172801211715598	0.18295682896567	0.145042219365484	0.115380670378115	0.0992683098370896	0.083309871814141
9	19	0.208997480003248	0.151602464638821	0.215153884134168	0.193121443514408	0.160841853990667	0.0809684131065953	0.148563969125471	0.175430301984491	0.190524031422354	0.129356735421518	0.109590426750176	0.101468755780884	0.0809684131065953
9	20	0.202237366015901	0.141253457519179	0.175024393711351	0.199467633012677	0.164294078362291	0.0752902601591411	0.150542011532052	0.177035310021225	0.185305626137895	0.131886563707519	0.140542165861797	0.101410338726122	0.0752902601591411
9	21	0.173045115446902	0.140603249412587	0.173804691074098	0.212000368631855	0.159298897845812	0.085806640464813	0.148478224042493	0.168879322730571	0.191111947145944	0.140221599111838	0.123632263576342	0.105923226381559	0.085806640464813
9	22	0.165731569585272	0.102095136200757	0.176947092720094	0.199923771002149	0.148264579053781	0.0787146299073155	0.153200398536398	0.175868699440451	0.179936821158062	0.14980082544486	0.0969331547039087	0.102374309516511	0.0787146299073155
9	23	0.154909780375581	0.135333380879754	0.177493837630719	0.192349809407179	0.150732909396086	0.0760418209120472	0.154426898402958	0.179747263299721	0.192471080884053	0.150521957902837	0.0943018795880959	0.104918680899635	0.0760418209120472
9	24	0.20595970303952	0.123045373804295	0.193321633279603	0.204980375300219	0.157560221599409	0.0974564979486871	0.154262766578052	0.167202707080144	0.184048150003804	0.159100868584053	0.0958160704903393	0.114747933889577	0.0974564979486871
9	25	0.171310133239081	0.0582556585230237	0.204727038959072	0.203013555688194	0.15255163550179	0.0998093031856012	0.157697708517224	0.175055946356806	0.184735500630078	0.136816267672076	0.096284324067659	0.114372011468797	0.0998093031856012
9	26	0.113626600063987	0.137764467374311	0.176885414073558	0.185377835598484	0.166655475034162	0.0838521423659865	0.158924218843606	0.17973203915916	0.173761796965287	0.156771756472418	0.100565311589582	0.11674738583811	0.0838521423659865
9	27	0.147116750823165	0.0611513459805877	0.176080429687956	0.196013203851648	0.162418268632516	0.0651058990699529	0.160418332918769	0.177345731992557	0.169834112481393	0.151415757323795	0.106288492511967	0.110732083763034	0.0651058990699529
9	28	0.115751967117061	0.106379253532776	0.217750592994474	0.195687632036212	0.148693751928751	0.0911990366610652	0.165176477929001	0.172776728210781	0.170519906663997	0.128745026412595	0.121622075855617	0.108345002932549	0.0911990366610652
9	29	0.176085188494382	0.121375714411525	0.178837122149233	0.204227948753761	0.149933836176159	0.0880036229869544	0.164590786459839	0.170189607264111	0.164233807343737	0.134775556308143	0.124439225354088	0.107787052718831	0.0880036229869544
9	30	0.174437171281063	0.0494145417163046	0.206539909773032	0.206548678715597	0.154995741074672	0.121998124114425	0.167653518962849	0.173485426363104	0.168706457431081	0.137133858512404	0.116596027890689	0.113356522208201	0.121998124114425
9	31	0.143425084443073	0.0334179032509027	0.197481107525422	0.202770483648081	0.159321873306183	0.111873823212861	0.16858520498054	0.178230938762951	0.172108222009807	0.140826633837836	0.111893487729584	0.115967987618715	0.111873823212861
9	32	0.134302369155377	0.0659278035227561	0.177888489306593	0.189216107064905	0.16360394692782	0.108291575610051	0.16798772539772	0.172646552710045	0.167115177364441	0.149929083451904	0.100475429188111	0.11608873033966	0.108291575610051
9	33	0.120856161056092	0.132481692417803	0.175129312438341	0.205146619929568	0.150839334904666	0.0995789109048655	0.169125304404139	0.175217131188254	0.17393429079397	0.152917173103336	0.0982249809969019	0.116626176807391	0.0995789109048655
9	34	0.112824462580378	0.032420910228056	0.204195276288502	0.208266490973687	0.158424238255131	0.101791690960048	0.174038923088278	0.171944831531265	0.177877815982465	0.140012924498995	0.0991055818518367	0.109668718585746	0.101791690960048
9	35	0.105706327096961	0.0356027313903201	0.22012926034164	0.206060098984216	0.1532607315675	0.127162586664737	0.17420199250938	0.167282461251378	0.175396719013632	0.123615946778804	0.100001185148883	0.12128267032113	0.127162586664737
9	36	0.0998443665009301	0.0316533067283548	0.214027777449047	0.198489939344602	0.150386688958957	0.126589360454564	0.179513854112487	0.179197784012053	0.169842355953011	0.114780523826168	0.101254351758906	0.106178733023449	0.126589360454564
9	37	0.115480201650169	0.0433942995875093	0.220587424589725	0.201642227163362	0.165436085094789	0.146711471783566	0.182862426513462	0.163339673351274	0.162911717407296	0.13373687800305	0.0999986635069169	0.0952496818342327	0.146711471783566
9	38	0.148780989386658	0.0685153656522152	0.218564670421151	0.201378979827985	0.154513779171583	0.128073976788886	0.167538548541817	0.164904113810456	0.173235725067574	0.131109653605852	0.107157579562319	0.107716407356884	0.128073976788886
9	39	0.129898473108505	0.0155360319440413	0.222370834792506	0.191283029188824	0.159558947110438	0.139954827486278	0.181589673816676	0.166446270372131	0.156455702602004	0.147301625193063	0.109357280788558	0.103630933962132	0.139954827486278
9	40	0.128306425276976	0.0418814582467444	0.218054577957712	0.202922259432842	0.153800646388194	0.152415770616397	0.183739022158006	0.164782905403655	0.168342625457108	0.139971377435581	0.113602618913327	0.101816318432194	0.152415770616397
9	41	0.119909573001987	0.0428436431747218	0.223071263083713	0.200896064299022	0.153219890982162	0.127078679932095	0.161161782313199	0.170975670594418	0.150250626790528	0.150229630664835	0.110883421554864	0.0931329489098427	0.127078679932095
9	42	0.11750954647122	0.0168014168675699	0.222076100409119	0.191877339210673	0.162046948031736	0.1403972692226	0.17391906801848	0.16735715067333	0.165856674188171	0.142967505282906	0.115065630280376	0.0758279244817343	0.1403972692226
9	43	0.10747699749341	0.00841509189449993	0.226080669889034	0.183621778090616	0.165811752378113	0.127836976689162	0.176383950989355	0.166067559432487	0.148404818373204	0.139594560749116	0.108107553176885	0.104865972501554	0.127836976689162
9	44	0.0906454916277093	0.00410216285265915	0.211988226588501	0.206125289316917	0.148705776944324	0.149883636619682	0.181653162451327	0.171718923911723	0.152749441488959	0.128145776432392	0.101727952496809	0.0979204576555096	0.149883636619682
9	45	0.0940637874028041	0.00411187220548772	0.216957066686843	0.19909452851665	0.164552386135763	0.153566486233993	0.171775389351394	0.169129118279545	0.146819332314983	0.116638906616304	0.0988332603181501	0.0777358685107332	0.153566486233993
9	46	0.101460359706389	0.000340299463524606	0.232258678364882	0.198769785736155	0.169623180809654	0.152907250807639	0.180764316745567	0.173241109034613	0.150613631787598	0.105952882425802	0.101145395362878	0.0902057500999484	0.152907250807639
9	47	0.0990445898867027	0.0167605928961019	0.21343193597691	0.194442402806181	0.159944201795459	0.161403136929668	0.176648523035559	0.173774107189828	0.155987067381606	0.120327920545908	0.102885654060339	0.0935134427266864	0.161403136929668
9	48	0.101444284045213	0.0123973045043668	0.207069403499018	0.196846399073197	0.172301504842643	0.167883541451186	0.175611756886675	0.177134772103471	0.140096604527909	0.131986352981207	0.102963666053414	0.0943598452723534	0.167883541451186
10	1	0.0115113625428156	0.138034147651977	0.207729009050239	0.211998241791371	0.183773112583667	0.120566276032871	0.211970958589757	0.194346336844233	0.177370100617465	0.197511350266463	0.145287071113942	0.169067694895224	0.120566276032871
10	2	0.0143789519912459	0.147696880132611	0.226927047827098	0.221454944916897	0.196274111386971	0.0992706436007842	0.209083303689591	0.20121259481904	0.204406889850534	0.17736768822078	0.159425775320371	0.165786815184487	0.0992706436007842
10	3	0.0223851853194864	0.138797237183066	0.204294040219223	0.215202792403914	0.221315872823016	0.14046365095474	0.216099117592272	0.216432238238225	0.240415959926387	0.230310999535073	0.217565760728584	0.188369504034839	0.14046365095474
10	4	0.0636799123844462	0.133681131904779	0.224868926216328	0.221237391572421	0.208474210763983	0.158458117351665	0.209259397560709	0.242229576709586	0.228673235755659	0.223572178382622	0.201956383053364	0.172926527597377	0.158458117351665
10	5	0.0778041523925998	0.134384356069648	0.216967789195453	0.216844918454431	0.213657230347738	0.160055538511986	0.210939277876745	0.23387634498684	0.233695996559433	0.234667827189226	0.181052248814104	0.156682613301567	0.160055538511986
10	6	0.095362740941396	0.125884668968664	0.226444203965555	0.208074239810814	0.204325851529369	0.147560563141228	0.210265374047291	0.239070080181706	0.242940430450572	0.232065645580659	0.183934487320992	0.169971448663942	0.147560563141228
10	7	0.085013281292817	0.137282511219644	0.217690035907627	0.213476365949729	0.222620334271298	0.147801214758357	0.215026521633382	0.217840692079134	0.232538996202593	0.228044677284668	0.178083014177078	0.159954331648997	0.147801214758357
10	8	0.115592501372007	0.132843920949482	0.212074442919366	0.215270253528227	0.175590633915586	0.141152668114119	0.21212628824848	0.234953013761001	0.233625781588285	0.224277659169362	0.182411209314056	0.16311542175983	0.141152668114119
10	9	0.1301877064877	0.134681286856311	0.205193801133401	0.208754046105435	0.192486785511459	0.150732365334836	0.217252361332474	0.228411883634502	0.232235970487963	0.232126481424699	0.191766078751348	0.174053251824291	0.150732365334836
10	10	0.118976358062851	0.143204795105936	0.202645785139845	0.212233467670193	0.201861565660066	0.144825844110895	0.219203029726867	0.234370129440373	0.229584063741369	0.23476059656351	0.1728577716477	0.163405214178115	0.144825844110895
10	11	0.110471288618632	0.134745215526364	0.186317934760745	0.212464200866788	0.197468428038898	0.155219398532083	0.217299881054813	0.238745473095645	0.22181107520951	0.226217859468924	0.189446731761573	0.173055661094836	0.155219398532083
10	12	0.129553411451549	0.122154869063471	0.187464135597421	0.213697774139318	0.187328484706708	0.147112209738878	0.223375386572139	0.228768572325263	0.226464457378263	0.227699213885431	0.193947592667294	0.159675746799452	0.147112209738878
10	13	0.130923323586398	0.0994511041378879	0.194207384563765	0.214269435483324	0.167253909719685	0.147433413838321	0.217710980660465	0.21657089872699	0.234124672234881	0.225418284772925	0.189644156311473	0.162994832082134	0.147433413838321
10	14	0.137592794423389	0.123239114504313	0.190688300465346	0.219861049525175	0.192397074020077	0.137564773433169	0.229553279606453	0.218100688441453	0.210208324962159	0.2369570852868	0.198179018988742	0.164640460151927	0.137564773433169
10	15	0.157196114206179	0.121485390791304	0.204824094638602	0.222339788710056	0.207933513917932	0.149462341148095	0.226666392740171	0.21212571407435	0.231680046675379	0.228227832976398	0.187770218140541	0.160880226103782	0.149462341148095
10	16	0.163169197047571	0.122047087719256	0.207545293829483	0.223460588619086	0.214242308526473	0.140902161153223	0.232291828960184	0.223462496403359	0.239506054880324	0.235795552311803	0.185577303533342	0.160725735565551	0.140902161153223
10	17	0.142109215070794	0.118803897155948	0.213016057501636	0.22566070991963	0.198241894765262	0.143342287814972	0.238489176251642	0.209113746989548	0.23067842027851	0.225549663784777	0.179329162056998	0.171015654060354	0.143342287814972
10	18	0.187916386767122	0.121982489251534	0.201228086873918	0.226511685789517	0.187796574509232	0.144780931035985	0.226580275635331	0.213500052205349	0.230010463878993	0.241528745792688	0.18586637497268	0.176887841476376	0.144780931035985
10	19	0.169871854502614	0.106673576871012	0.19543663646166	0.222565210117722	0.173798827357384	0.136281741135303	0.225155488689967	0.202806596111857	0.240570658314468	0.232083393317289	0.188135511879495	0.165805491105443	0.136281741135303
10	20	0.175143682482306	0.102794948112913	0.20756520887651	0.228096507240615	0.192951003345783	0.148219622641561	0.237612081361949	0.195194887455837	0.218929136014657	0.244146542720399	0.191251372331248	0.168312851680335	0.148219622641561
10	21	0.194575873674996	0.100453622390624	0.203866144611982	0.235807274436074	0.170830282067819	0.140388995705719	0.239818003554706	0.188631038008036	0.239544377445786	0.242803522617963	0.184911486345091	0.171295544242405	0.140388995705719
10	22	0.18940651584069	0.121182335083611	0.203978441419704	0.220933899546869	0.187640401375658	0.136530909802714	0.236920724953206	0.171701858093553	0.211987009167847	0.217713613088173	0.187963992245978	0.173493091528285	0.136530909802714
10	23	0.189555856225481	0.107502560442012	0.203011710723695	0.226859601320187	0.175669364212449	0.144866978405133	0.238750153395025	0.196007222262532	0.229583732308156	0.240526380345331	0.1897611950155	0.178263370293264	0.144866978405133
10	24	0.175868935528829	0.0967540109334893	0.203970034482519	0.231476954942244	0.185755001862421	0.135677665460732	0.225683598854845	0.210620126924645	0.243445467054962	0.231020096792884	0.184231071392384	0.189721727096296	0.135677665460732
10	25	0.170044238702659	0.0987878162985216	0.202920136725517	0.230273421631174	0.176055910892029	0.134459497232171	0.248179508823633	0.170793120457455	0.194585329146692	0.218421216331764	0.190989536237474	0.18419613244179	0.134459497232171
10	26	0.185556822132131	0.0923269330806389	0.200174872543546	0.232204292666935	0.190654919640701	0.154907997347562	0.223625668913493	0.201536653158081	0.21158633200635	0.223656427910302	0.197333987458624	0.176953901099323	0.154907997347562
10	27	0.175679734178423	0.0892259233372384	0.193226407619534	0.218433833673246	0.180583360932984	0.146827214107021	0.207350887039747	0.181245249116246	0.208083319814461	0.218777593575379	0.186244844289226	0.172693766582235	0.146827214107021
10	28	0.189879712967701	0.102012591173984	0.196282890675773	0.216651300138122	0.197458149837576	0.147303166793927	0.200586028222797	0.19241920544337	0.22130957460202	0.23896672808262	0.194906107573723	0.187507234107626	0.147303166793927
10	29	0.178342868059432	0.130540136128058	0.197344874379971	0.209675491586209	0.175170139972399	0.145461110011705	0.230263066661103	0.212068348175696	0.227545821248555	0.21786777763804	0.199628651103674	0.166918587539259	0.145461110011705
10	30	0.17936343414085	0.139420246220997	0.190455825179732	0.207480452005313	0.200733702672694	0.153375888237187	0.230733083568019	0.192719524320678	0.207302949242563	0.211411553947521	0.208492180778955	0.189255585313499	0.153375888237187
10	31	0.157787614522604	0.0923798695978894	0.197206973268822	0.204719742087861	0.208170945580964	0.147774837889987	0.194413741367187	0.217380761373002	0.21978372483239	0.203889258276409	0.192353415112819	0.180339882799669	0.147774837889987
10	32	0.143904963815744	0.0943667091221275	0.191529430228277	0.20387271145423	0.203254458234142	0.130364841312961	0.216825012099672	0.211175516556146	0.225689300350739	0.220895232043962	0.1868133840433	0.170640594634413	0.130364841312961
10	33	0.158482005770844	0.0869210853898476	0.177932386589852	0.2042733146236	0.177765545130606	0.151193146047225	0.204424562679937	0.207060617032187	0.227212420469131	0.230319276046976	0.201332814807564	0.168293515012022	0.151193146047225
10	34	0.155086075693233	0.092082724801225	0.189268555090689	0.197516290512852	0.19143376884789	0.144913850612372	0.231599166316028	0.22200050312847	0.236090653661912	0.225826751953923	0.196816007943144	0.161125437093457	0.144913850612372
10	35	0.165449735526913	0.0648271448903956	0.189571542827639	0.216187396459249	0.193450012567024	0.147315148014339	0.247537546607801	0.177488995001239	0.219290271737189	0.228156967123123	0.185961911206338	0.17127193155835	0.147315148014339
10	36	0.145327891506542	0.0767829204199694	0.189880615294778	0.214797335398405	0.195059348089972	0.156923997540685	0.223283341325073	0.234163636295508	0.225639140120631	0.224785028457096	0.188990743155276	0.162948529704956	0.156923997540685
10	37	0.147509734212137	0.0473718186855601	0.193962851269771	0.226759381463168	0.198083406681933	0.153005101226561	0.217037596813538	0.215723361647943	0.229041276678844	0.198810216299275	0.187555810312575	0.159180273470352	0.153005101226561
10	38	0.143053292112254	0.061268375505158	0.183614147993621	0.200790007049186	0.183020395888183	0.157822232759754	0.202090266534334	0.212019984034161	0.2132458957125	0.226980704697606	0.197234818056593	0.170091409553143	0.157822232759754
10	39	0.141867114522668	0.0334448731794192	0.196642530193333	0.199976810686759	0.201574320320342	0.162994854897178	0.223643734641544	0.218670408979515	0.242812977215475	0.197845225114647	0.202028652062488	0.165721492454652	0.162994854897178
10	40	0.146268600451536	0.071354665111436	0.185794622493031	0.207501348872138	0.182625526386561	0.162315114679444	0.199215550089964	0.203695582951871	0.227245446403103	0.226493931238536	0.185757443770377	0.162917127500817	0.162315114679444
10	41	0.144580880930326	0.0731417518884929	0.189056335792354	0.206492489108522	0.207928884193742	0.171480176955358	0.221227884962335	0.193276230806105	0.245462693484842	0.219250221956793	0.187053250940388	0.152717881466978	0.171480176955358
10	42	0.151658326033851	0	0.188944568828739	0.199907194741972	0.181715361162637	0.172853291904703	0.220077651483138	0.191790932645661	0.196655282963551	0.199816253410788	0.185062522660354	0.169439277530917	0.172853291904703
10	43	0.163610469241139	0	0.172340592370303	0.210912516692619	0.181339549918877	0.167247881205127	0.217838423357138	0.213141138130965	0.214368362232189	0.20658620364523	0.195460825053311	0.170717681555725	0.167247881205127
10	44	0.149457009731878	0	0.183422765377361	0.208925603865346	0.199111132152338	0.170321570302812	0.224366045504416	0.212884637970073	0.228088174306426	0.206010409266744	0.193491691056769	0.16350411097143	0.170321570302812
10	45	0.155149025801144	0.000619286025812945	0.183441356731734	0.202301541948685	0.187369090719307	0.155657024366823	0.201854389536884	0.203822926899409	0.222421864256249	0.199260468799878	0.188706501839411	0.16132001401133	0.155657024366823
10	46	0.149618088427327	0	0.150075211506265	0.204451496374025	0.206504335062533	0.157113972763109	0.218361194605634	0.206972849835553	0.220106387581158	0.207262628794275	0.178611790592248	0.163303705067543	0.157113972763109
10	47	0.134958997063604	0	0.145416309014431	0.210474096879221	0.200714794177891	0.167863300096323	0.192801057048619	0.216046837721296	0.228500948541755	0.194722544260253	0.17807259071758	0.156333838531519	0.167863300096323
10	48	0.157618752409587	0	0.177585867153937	0.206828096718656	0.188111948782651	0.155266800840758	0.214401679815092	0.189257904604053	0.225729491159431	0.215594487740811	0.170059564626506	0.156656471358626	0.155266800840758
11	1	6.51284657370648e-08	0.0645065483571495	0.304030727300339	0.240927047166888	0.282051268183247	0.236859831219191	6.51284657370648e-08	0.294456139526736	0.300117451257939	0.230125078892683	0.250294216232582	8.49176371539544e-05	0.0968026480747339
11	2	0	0.105145993608186	0.300665912580974	0.24384676514658	0.307791350094455	0.254382646580895	0	0.298440179499317	0.289100002431362	0.220471666719319	0.249369388824002	0.0250793926032899	0.128150937389375
11	3	1.65013422895219e-05	0.00021187338446495	0.291651865363678	0.235487106816748	0.316771205117119	0.288541213068698	1.65013422895219e-05	0.294036402351229	0.274828449538549	0.219231585718033	0.260192925489243	8.33075282897217e-05	0.12106986223639
11	4	8.33080630104879e-06	0.000224282000834233	0.298893654689292	0.237660680562051	0.305344192930378	0.273602340956783	8.33080630104879e-06	0.297046930973135	0.275254919241657	0.223711569935509	0.257451546817161	0.00010433348757024	0.0766371486925691
11	5	0	0.000223457557081632	0.304307252401752	0.237185740443363	0.332741255930085	0.273725980675063	0	0.299253864715271	0.265181376815407	0.222060174059824	0.253489099971184	8.30798363805406e-05	0.129325883730507
11	6	6.16562558066819e-05	0.143271122656597	0.307100415995379	0.238431242146009	0.322676992587566	0.265696014098008	6.16562558066819e-05	0.291212881440952	0.273365428553895	0.222446720844998	0.25362837048618	0.0217342437590528	0.0774449178683178
11	7	3.92887726388029e-05	0.0940227738342258	0.31381793951913	0.238067633103515	0.329236432401884	0.273832546508241	3.92887726388029e-05	0.303040007596541	0.263403966595786	0.223983800701096	0.255490558940847	0.016651717628427	0.104877518776476
11	8	0	0.107912263891252	0.3032238950482	0.243192499358685	0.327366523855701	0.27974524887534	0	0.30407153469898	0.262263566815429	0.223805969419581	0.261269993926876	8.87253271413483e-05	0.104898004516585
11	9	5.10495273335872e-06	0.130037979472712	0.321910210936975	0.243572857233055	0.33303505931581	0.276610820752727	5.10495273335872e-06	0.29876019224432	0.259611389980583	0.221303868658395	0.24331479829882	0.000142458794857094	0.125738316575599
11	10	0	0.180931507652532	0.309792436822323	0.252060350560118	0.345847369973797	0.27534636094213	0	0.293019304554831	0.26016644557816	0.220732583713056	0.246732992397448	9.93551694197422e-05	0.0877692025313117
11	11	3.72870513300207e-05	0.0817275668871131	0.31425432500125	0.244172212443918	0.318324249356306	0.282963382510358	3.72870513300207e-05	0.299378531327713	0.261899380156572	0.219602966890104	0.244371550756209	7.94531690870518e-05	0.101328115357764
11	12	6.42100738816695e-05	0.1080384401279	0.314368022640123	0.252592552469979	0.299310870402854	0.273812954856611	6.42100738816695e-05	0.296438088097002	0.261205630198562	0.220925121347037	0.248469768668894	0.0315590536224404	0.115244572469689
11	13	6.50832184068698e-05	0.122984115161261	0.317751101572893	0.243698236300837	0.300220283303741	0.284774716531371	6.50832184068698e-05	0.303410594075616	0.260220170563085	0.232863210847931	0.236553725626807	6.56093313727589e-05	0.104820807315688
11	14	0.000105197377040509	0.0951824248699371	0.31385519756154	0.259987576773843	0.286663754882828	0.272540514990998	0.000105197377040509	0.301814614291759	0.256365305552685	0.22192824062031	0.236423969792711	0.000173437432303968	0.0619856842893704
11	15	9.87953356398739e-05	0.0731813115891888	0.316199642893602	0.255525620369491	0.330386821623547	0.283551534291184	9.87953356398739e-05	0.300221490765711	0.259114080755993	0.222310096743838	0.240089429091658	7.05566208410786e-05	0.0817630548786026
11	16	0.000107744063092544	0.0988639173667429	0.30146303249956	0.254327745297493	0.290104283324765	0.284496824267991	0.000107744063092544	0.310702840671532	0.256831128487521	0.223280089262445	0.262210248019795	0.021069696826608	0.0921095315378898
11	17	9.02168687883835e-05	0.101992442458569	0.327928268821145	0.253431020202277	0.280479632067905	0.286153915931438	9.02168687883835e-05	0.296134745369461	0.256815203116948	0.221887061914581	0.220613071196402	6.79863467690141e-05	0.0686237884534701
11	18	8.303638282933e-05	0.00947596432143083	0.312293084993957	0.259641947646054	0.247164801356842	0.287926536177375	8.303638282933e-05	0.291505000224964	0.257607441209416	0.222350236918555	0.231616424715251	0.0138433129205508	0.0676883426467543
11	19	9.42879595986432e-05	0.0600643909480355	0.31323542174917	0.260576309836344	0.249645980111437	0.282179860717586	9.42879595986432e-05	0.297486658704446	0.257994595881255	0.219962768785213	0.257233019575012	7.35229786448593e-05	0.0538613511118909
11	20	0.000134153480394188	0.0627521725851211	0.315018800321049	0.238141820335349	0.296811761231383	0.28029781116883	0.000134153480394188	0.28282872806402	0.258006182054696	0.217040004576338	0.262406888061733	0.0432715949320574	0.0643911958275352
11	21	0.000178195526897408	0.0843757317555481	0.326307933545219	0.25940376120353	0.295844640447969	0.283697975959025	0.000178195526897408	0.286389168281383	0.254254494272315	0.222531057319136	0.256975973384471	0.017494285136495	0.105700166559823
11	22	0.000209289962923592	0.0792244889212556	0.319687753934412	0.249560886949165	0.299521208734536	0.284087831526742	0.000209289962923592	0.29368619358525	0.255871692303104	0.221260949440467	0.218136456910425	0.00180504537438921	0.0585189301130893
11	23	0.000219576567105929	0.0411094135985865	0.319665135117133	0.263079643902066	0.310043520045442	0.283767277960961	0.000219576567105929	0.29138783133218	0.254782340603808	0.203936320797176	0.255398099149737	7.7843149618972e-05	0.100952587464421
11	24	0.000235891320811416	0.0660308451036539	0.292970718869672	0.251141234947639	0.312290003674568	0.292357506881957	0.000235891320811416	0.296850002212064	0.252722519390578	0.233124263502263	0.226644361113951	0.023487224811498	0.0890807608950177
11	25	0.000309016704022155	0.06980059392665	0.304946586730541	0.250968764769793	0.305034138443066	0.295764176982697	0.000309016704022155	0.283058908479243	0.251757183267746	0.220438807865105	0.197312446918422	0.0270197062192249	0.0809824650647723
11	26	0.000269211473009023	0.0755583818094099	0.30166567005504	0.245499895091101	0.271288046892215	0.28440982169555	0.000269211473009023	0.28782553611723	0.247922550339158	0.221931879968002	0.172990892239239	0.0096404543520982	0.0986582536069251
11	27	0.000241298051395238	0.0979112209996384	0.314850712938426	0.259176339637367	0.259970388596291	0.283911339081011	0.000241298051395238	0.298278908839574	0.248382082495604	0.221193326146928	0.111000152567004	0.0335734429578069	0.13923072033498
11	28	0.000231197158665613	0.067618289641741	0.313383675576168	0.240681691540295	0.311689848426837	0.282437439660888	0.000231197158665613	0.293576176395502	0.249231544941919	0.221879695471957	0.108998440221234	9.53048087463578e-05	0.15475856165318
11	29	0.000294667956978797	0.0929869188071024	0.312423836634974	0.245841738729199	0.30958804667917	0.282934418219653	0.000294667956978797	0.286074014182396	0.24883071087885	0.223356180220076	0.12332704634933	0.0326796382016571	0.146916573807749
11	30	0.00028233642847194	0.0733922814109928	0.316681205433049	0.248482776423473	0.325237272532532	0.282917060868504	0.00028233642847194	0.27871630117587	0.247753369342758	0.222908353678796	0.0502007045921759	0.0226352467175239	0.124313885784885
11	31	0.000211255623769105	0.0973946444609647	0.322219608598755	0.252477773604049	0.31565413883067	0.283351429531424	0.000211255623769105	0.287572650748345	0.247554665453572	0.226632289750405	0.00035958642107408	0.0157735605529047	0.118674011099055
11	32	0.000277246020994244	0.0773531736387718	0.317504699401145	0.263846810641513	0.277765502587255	0.285992420561092	0.000277246020994244	0.288161574782997	0.247178910539571	0.223140201520385	0.000208256057695576	0.0261712191631253	0.114599814344032
11	33	0.000239845544734489	0.0832826781154513	0.324902746580422	0.238333119433331	0.262747598201951	0.281692826483957	0.000239845544734489	0.286036406241906	0.247424296128029	0.225911552102737	0.0621900687541862	0.00305461137007573	0.0999690411572386
11	34	0.000251453421279608	0.0935208541543049	0.329784085739607	0.257856841733543	0.289032442860834	0.285524334277923	0.000251453421279608	0.275738898624095	0.244983460710641	0.221154125621275	0.00033577327607512	0.0318403869600883	0.0994533139667499
11	35	0.000243318146163417	0.0991994808521213	0.324842354712482	0.261006413231638	0.273768637278122	0.266940470154453	0.000243318146163417	0.275976175864772	0.245323320114408	0.221972108135713	0.000408762635095558	0.0121924285475858	0.141881230656905
11	36	0.000231116884507842	0.116092538425365	0.3270607969301	0.26403409308931	0.278389732463541	0.293756516224714	0.000231116884507842	0.267341271460415	0.244258301685021	0.221158433920686	0.000435441499231262	0.0580759455152191	0.105665542523148
11	37	0.000190761186888323	0.113238546417602	0.331238307756355	0.25718160270166	0.273410225350416	0.294413044991799	0.000190761186888323	0.275786428433667	0.243455213826817	0.222839855013789	0.0138425556786714	0.0912653213310975	0.173164759537034
11	38	0.000223326365989815	0.148621162002475	0.337384260292165	0.253022628510391	0.273147662637375	0.311648249604526	0.000223326365989815	0.282571297567922	0.246760073331473	0.223883128080396	0.000342938451069266	0.0499876344793614	0.128441608873631
11	39	0.000228168415445343	0.119184363492684	0.327544366180533	0.234010981194695	0.259726623271424	0.302968298431862	0.000228168415445343	0.274108545121151	0.241518403350486	0.221984008019845	0.0171442522539326	0.0892712044116678	0.15687787830066
11	40	0.000248755464033377	0.151560730505257	0.333715584658246	0.255681444345669	0.247706078665935	0.29625761842074	0.000248755464033377	0.277065369620286	0.241822927039336	0.220396385773529	0.00906528636257185	0.020408502357834	0.168277302445734
11	41	0.00025105729913785	0.126530010269318	0.320250134901483	0.250344552546672	0.274384959898327	0.290534956762759	0.00025105729913785	0.283392697200693	0.241273978373381	0.223766505890257	0.000336019038943721	0.0419525580022399	0.195812354939424
11	42	0.00024472886619986	0.105778338243764	0.342367454549457	0.257800984332546	0.261931173994208	0.297784561961148	0.00024472886619986	0.286288561793195	0.237721626216717	0.230273337866872	0.00644720125921941	0.0729726449939084	0.16715078757454
11	43	0.000216337426508827	0.137054591715535	0.345583874919521	0.267565094860061	0.267919263245245	0.295367179590954	0.000216337426508827	0.278385631503181	0.236997446614386	0.232034044246184	0.000260325177082316	0.0327839041455493	0.174098040952284
11	44	0.000236717404535338	0.102674013656618	0.34452594975778	0.268395327981624	0.278214319013511	0.292746312310087	0.000236717404535338	0.270104417902992	0.238615302931612	0.223328302743148	0.00560556669570932	0.0322537819136655	0.167811519758502
11	45	0.000214180319258058	0.0900424122173652	0.341574080669926	0.270277650003565	0.270780363045033	0.287486235594719	0.000214180319258058	0.277729177963397	0.239471586705489	0.233588828080414	0.000294604901196378	0.0643403019863777	0.138537431257361
11	46	0.000216503603868653	0.0764218772537767	0.34851627888435	0.257652788811647	0.27640078536536	0.293509022698788	0.000216503603868653	0.28131413107887	0.238711848729222	0.235977268625252	0.00020433686327676	0.0522476665070384	0.153974316592717
11	47	0.000263033576786763	0.0847606241678354	0.338118798274305	0.266471114553632	0.276863278555613	0.327209443987561	0.000263033576786763	0.280320355706326	0.237496264669165	0.238893247455176	0.000164486970449045	0.0281085951139223	0.140057736432456
11	48	0.000287696831906631	0.000211080389784055	0.346218912601371	0.263374662619751	0.281296754331503	0.321585122765541	0.000287696831906631	0.27873026638029	0.237584909914137	0.241189939924177	0.000305138636257324	0.0806095491647471	0.154943624779428
12	1	0.15705032423589	0.18761183969147	0.191160689287304	0.207675470913798	0.189898315703546	0.192354689273489	0.15705032423589	0.153715343505457	0.20046235409041	0.189914388343579	0.193208756678375	0.17428515672195	0.242805589542855
12	2	0.155219772850115	0.193833031895879	0.186920739887141	0.20311174957469	0.191774210443106	0.190672893073927	0.155219772850115	0.143706652580596	0.201593598790189	0.185588018551409	0.192262953517097	0.168545081839835	0.1793730691058
12	3	0.154549587794833	0.193402833838691	0.191800621386882	0.192931379437181	0.193406696972237	0.193531079609547	0.154549587794833	0.162656567171831	0.20434675684635	0.186082603899783	0.187801630313319	0.17091049054077	0.193411798899949
12	4	0.159970750484967	0.197419735592096	0.189035754894033	0.202809777345809	0.190602173123392	0.193664263137732	0.159970750484967	0.140110295760568	0.201771383496972	0.189040914772264	0.192154026174792	0.179599276125497	0.189435705829767
12	5	0.163095287457201	0.195055294497924	0.188685258891363	0.200355803876472	0.194810298267333	0.193191109546092	0.163095287457201	0.152791147481795	0.205591452268627	0.186130315959985	0.185216942282889	0.181056386087254	0.196763963872936
12	6	0.153661363700904	0.195771645745931	0.185825992071037	0.205371066412966	0.192360614867128	0.192607447518449	0.153661363700904	0.153758110756361	0.204864456069488	0.191137497249598	0.189276275770619	0.182439829928264	0.226882669996195
12	7	0.158854843224723	0.188589621363171	0.190100440017887	0.200642328148154	0.192758784677648	0.192548192977785	0.158854843224723	0.160469324038519	0.204856265000855	0.188263840756946	0.197258680354771	0.17666772874919	0.209309940780603
12	8	0.154173371228398	0.188844282811259	0.191622182547931	0.20419697714244	0.192556579113351	0.190437105784757	0.154173371228398	0.149159124820479	0.200894851027598	0.183281117779565	0.189743790974931	0.171912652008137	0.162357312333847
12	9	0.136973679617382	0.18677990522604	0.190222857656935	0.203784613123816	0.193397587554882	0.193306336293434	0.136973679617382	0.147579420645964	0.208965421065056	0.186034733776375	0.192586498403198	0.158034427164422	0.183988287661461
12	10	0.116230202226114	0.189908259365503	0.191707295257403	0.205628454949981	0.195178735641592	0.188518880585624	0.116230202226114	0.151155367294163	0.206325982764433	0.18860561779309	0.188934163594086	0.16776576852693	0.238905832126906
12	11	0.155109197649394	0.198039959798	0.187259325880871	0.202199164072911	0.19579427285311	0.190176906293006	0.155109197649394	0.135398607516506	0.206008600376592	0.18838116451075	0.183116586655766	0.174534004039492	0.178324068389719
12	12	0.170220331827797	0.193945584306371	0.189471434085907	0.20102240763418	0.196589609948275	0.187915086677876	0.170220331827797	0.150276657354233	0.193812877185392	0.191413205644286	0.188638063878423	0.178611720884631	0.202814142931869
12	13	0.16722161366911	0.194338535791018	0.187238497391655	0.200970058741019	0.20114404681387	0.187981567742512	0.16722161366911	0.150144015327699	0.208571374096273	0.199911241852493	0.193444943160788	0.174811361556685	0.184416554830698
12	14	0.163281208215947	0.193798233900591	0.187494379568703	0.196109532658209	0.204265766687129	0.189106081234816	0.163281208215947	0.139826092104721	0.208520013025068	0.197397698212294	0.192025480571735	0.152552850735157	0.177914140759936
12	15	0.141200787236841	0.199578210965458	0.187543044606494	0.204671974665987	0.204381330180992	0.189223567665229	0.141200787236841	0.148357795879999	0.210570989977982	0.191723665928387	0.184550624379525	0.13588056339711	0.193405262088359
12	16	0.157070996426462	0.197587233051597	0.189227864759328	0.202109773298209	0.202599699128966	0.188556184985617	0.157070996426462	0.14520819525235	0.202545908294215	0.194705046830119	0.187247495076953	0.136237325298514	0.147724372032503
12	17	0.158412277784598	0.195258173070453	0.191206295339481	0.194227875599997	0.2033871983868	0.18684649330428	0.158412277784598	0.140506302363834	0.202461059427515	0.193123943730977	0.192617995470887	0.126217106910908	0.153682137584746
12	18	0.16268662473103	0.196889974067369	0.189599233123692	0.197510378279666	0.200563331956745	0.191640238629416	0.16268662473103	0.145492849304502	0.20673646928531	0.188138024215948	0.19350968431897	0.133984451622621	0.13059934086477
12	19	0.127648514961517	0.182319801775299	0.194136533508854	0.193605255660247	0.202377212530634	0.190382988353991	0.127648514961517	0.158981981137508	0.206799286321781	0.197799417265482	0.196902886920954	0.133960370306757	0.142534242808811
12	20	0.152489288105649	0.184276762166772	0.196159741417298	0.192597707322299	0.202097064269507	0.189969089001317	0.152489288105649	0.152117648303972	0.203452266488372	0.20000211808043	0.194040329199034	0.134933663111238	0.162427824297085
12	21	0.150924960639566	0.187169541195449	0.196541172474341	0.197138771763283	0.204238711724259	0.192574382688192	0.150924960639566	0.175923559054154	0.200901379323498	0.193175303669304	0.190323263439528	0.133692043916	0.193690137841548
12	22	0.163867318778061	0.189276635125484	0.195396248921526	0.19787045020292	0.200498585268411	0.191354155748553	0.163867318778061	0.181121353646179	0.201357009848822	0.184265598007049	0.187103508886858	0.130112170476555	0.171768759610595
12	23	0.162359762761543	0.196475645254959	0.202961677290538	0.197119872705097	0.197288456554665	0.19263829200348	0.162359762761543	0.182059771856322	0.206403098260941	0.198460574319294	0.188103276372122	0.134779822704585	0.144087137256439
12	24	0.156862717541926	0.195821154696853	0.199788417527966	0.198283705474415	0.20128346818227	0.202763217445808	0.156862717541926	0.186481471617962	0.204591486864157	0.193641072738625	0.183438707294573	0.132014531689751	0.159904855383501
12	25	0.150734426289166	0.189256265416075	0.194012146078743	0.198726012113431	0.198830884618189	0.189970856970061	0.150734426289166	0.185950783398217	0.198096255256956	0.190390004256153	0.187510783767046	0.132325133597691	0.169460045531493
12	26	0.158342623885154	0.1903281414424	0.195829196461049	0.193491375557491	0.197482135629201	0.186693269324233	0.158342623885154	0.173639229725334	0.206040414269465	0.191619901212319	0.179245801005168	0.137726225155373	0.168253341716574
12	27	0.153002221735198	0.183868366525989	0.199104327712342	0.191438854435863	0.200139074991492	0.191264491473648	0.153002221735198	0.17835139580817	0.202384261093614	0.193494293204468	0.181476391916449	0.136019916062746	0.151317035095001
12	28	0.15963222013294	0.186387818941615	0.198932792219148	0.199440214253909	0.195922613135072	0.191857375435188	0.15963222013294	0.170514735286372	0.207587293349092	0.192700933839708	0.18722230037477	0.130791594161577	0.167674099575144
12	29	0.154949682005461	0.182578950139424	0.193573806445083	0.196496746347644	0.195787549715154	0.19375889476093	0.154949682005461	0.175084030229698	0.205178050465773	0.193063716559785	0.172103724286407	0.117925414762291	0.149665095101372
12	30	0.152580940335797	0.179529579961952	0.186536966278873	0.194543057822729	0.190485296231618	0.19518397616367	0.152580940335797	0.17285399218354	0.205323107862331	0.190423142648057	0.17133855990466	0.120130064983219	0.178062971979067
12	31	0.148832558803405	0.176874683558658	0.196362706641327	0.197881820300265	0.191840365703039	0.194131891389658	0.148832558803405	0.179103437005041	0.200651382711188	0.191596942488089	0.170581665612974	0.123535764077195	0.174667371235492
12	32	0.153737965308882	0.182760653307028	0.195394086400779	0.198665297026416	0.190005554617374	0.192183878744287	0.153737965308882	0.180259375839119	0.197915552598098	0.190639518094827	0.181865381343843	0.119649277099863	0.180414227365523
12	33	0.153639366362969	0.164935619566387	0.193955489190326	0.19604695456872	0.194897463461519	0.195320922285973	0.153639366362969	0.182202257446696	0.200917332624726	0.189748422379105	0.170158046654084	0.113110894486676	0.17276523120014
12	34	0.155807700386806	0.166691690414992	0.199183055706089	0.1958400086215	0.197413349188352	0.194211114031535	0.155807700386806	0.181215186758941	0.199869244524688	0.189911688346639	0.17639082487562	0.105952100785841	0.163393506902739
12	35	0.155940013519551	0.154526329273384	0.197319997538718	0.200121783399842	0.187453133567302	0.194697981471302	0.155940013519551	0.187160365747758	0.194405489364893	0.19111069872383	0.171966438742049	0.108286370165021	0.159667115637463
12	36	0.152116613374797	0.169290073664674	0.190116092305259	0.193805254625526	0.18408106752119	0.194105902322865	0.152116613374797	0.186948740672629	0.197725350071426	0.187097301789529	0.172732594528758	0.116189834267451	0.178438093589748
12	37	0.147528436635608	0.153240256947078	0.192329585121826	0.197331914322746	0.193146774613087	0.189025646551749	0.147528436635608	0.185150386621173	0.195632305128283	0.196040172992231	0.169884747770441	0.0929058290509244	0.190747492270518
12	38	0.151719655868426	0.15715717173199	0.194272983949574	0.193823750946676	0.191050260356461	0.191066718332002	0.151719655868426	0.187040882058072	0.204576939680717	0.190241424483401	0.18258204209448	0.108225863215963	0.188010736065087
12	39	0.154341071929602	0.150630959918188	0.19983658788686	0.195328604271511	0.196361390740296	0.192278110111653	0.154341071929602	0.184838755074175	0.199649378871429	0.194419717604935	0.174562656019398	0.0948922685650742	0.178536498639308
12	40	0.145849270091067	0.150377960569171	0.191595782218265	0.192584891011509	0.200204530924647	0.190391919082573	0.145849270091067	0.186910343780718	0.200037993571686	0.19213433959891	0.180915271100626	0.106543194987051	0.190425395800226
12	41	0.155090659050115	0.148811408971515	0.196637640295048	0.196526036078245	0.201798178955953	0.18954091404769	0.155090659050115	0.185303087375079	0.193627343522287	0.19224071611243	0.170168617241144	0.0935094283229307	0.184735585923589
12	42	0.157702110925609	0.15358747260875	0.200159279679106	0.199598104698497	0.197507734616898	0.189756599810224	0.157702110925609	0.186840451352828	0.208476149045534	0.184221462488676	0.168313817932397	0.0947064112356378	0.174502118207375
12	43	0.155523129162845	0.149755097544483	0.19551765686547	0.197660762709504	0.19703397578229	0.193968374955299	0.155523129162845	0.178118667919831	0.195053874087113	0.18297796559492	0.175262355282349	0.0996287086635213	0.17359035264557
12	44	0.155067230047768	0.146714792235903	0.194751273769266	0.192436521906585	0.201971889816785	0.195591978522557	0.155067230047768	0.183900752257231	0.202397393292998	0.189551038687052	0.174248921929265	0.0860808519340429	0.174789004217952
12	45	0.151239298774945	0.147421929166787	0.196932865325096	0.19875903297484	0.188111729412262	0.19216302782069	0.151239298774945	0.189270953224438	0.201559446821777	0.188301393113833	0.170150932031951	0.077191856948278	0.181845549419787
12	46	0.15338707216089	0.141073196959267	0.194830742425356	0.193917815798858	0.192695703096109	0.189120111939031	0.15338707216089	0.190454438840244	0.204022989987556	0.185653168856275	0.182025126391447	0.0816509357852051	0.16990820427346
12	47	0.148192485613079	0.146792123989261	0.19338622282889	0.193930553305252	0.200822333969405	0.190230184363102	0.148192485613079	0.198950818487752	0.199958992782724	0.184349359742208	0.171280346404521	0.103228076909424	0.188612101248383
12	48	0.145260440930738	0.144925085604503	0.188500977290088	0.191553007718156	0.184101631954457	0.188124994366419	0.145260440930738	0.186931197268696	0.201827666643014	0.19178214221828	0.166409853053568	0.0977002064779323	0.177834784101274
13	1	0.179874431768238	0.238990793714265	0.20163032005212	0.19041034433018	0.18052645760809	0.178217953839831	0.179874431768238	0.153045989889515	0.181440126858425	0.161245958441258	0.158993702424241	0.195749602715602	0.18483641894833
13	2	0.184647734369213	0.253681739022874	0.210744030365715	0.178666157400612	0.184696164983507	0.179010341355971	0.184647734369213	0.168139828922831	0.185292540785578	0.160796414300086	0.148545164263924	0.187488797484363	0.184493536400013
13	3	0.285566324390014	0.240962332409054	0.209703651276231	0.184611862902735	0.177751198953964	0.173989955507378	0.285566324390014	0.177362210670076	0.189898439022451	0.162728482758264	0.16222616942367	0.178977753381242	0.184986341654191
13	4	0.302389846355767	0.244393733175303	0.205304969458007	0.172650219521931	0.179064459838769	0.172152126706014	0.302389846355767	0.185174055606599	0.179730156826105	0.166776900647367	0.149905990224696	0.181538515805599	0.191016992666178
13	5	0.271517111930099	0.246373746550358	0.211696976233055	0.182876313381806	0.177793623080347	0.171875289601405	0.271517111930099	0.169885169660491	0.184198161830034	0.163245537039671	0.15564435078077	0.19545501544616	0.172469229220869
13	6	0.219350978392717	0.242262884164903	0.208942645999036	0.182731123711285	0.178970921244831	0.177851171174893	0.219350978392717	0.160720669662835	0.182624959579131	0.166287368238812	0.155243637500884	0.189452660123487	0.171180163972478
13	7	0.189282877176021	0.232456056794487	0.202032308586061	0.183289879297267	0.180589950300166	0.181892243904074	0.189282877176021	0.163508169703763	0.196604020404866	0.1771732086652	0.145815143594992	0.188351670919768	0.176827845254507
13	8	0.186308156529635	0.213595402564008	0.203299804148276	0.190866026954748	0.178790415459976	0.175870962204504	0.186308156529635	0.159916599700468	0.208132499286856	0.176670801842209	0.148537081848332	0.177910694235378	0.176818729920387
13	9	0.184185327501001	0.219916027335699	0.205438216898977	0.191270259178461	0.181287050230384	0.180344521944009	0.184185327501001	0.162620742448413	0.207515452741272	0.171338582155789	0.148843905972809	0.182371293843504	0.177795904561789
13	10	0.213807319528432	0.219178587768536	0.218573763341436	0.176203225783602	0.182678226589328	0.170402573529898	0.213807319528432	0.164724927622618	0.199865824011567	0.175895507821948	0.156545581973664	0.189279679383196	0.175033626318246
13	11	0.196025593658733	0.209494107968041	0.207264233693732	0.180118345147085	0.18033824272256	0.170562387201241	0.196025593658733	0.18208508480655	0.212716399045284	0.170915706168548	0.151445209378467	0.203833023910986	0.163345540804133
13	12	0.211214317762385	0.239065200092911	0.212839055714995	0.178782407193278	0.178924323243106	0.169642490797782	0.211214317762385	0.155920709756307	0.197431751873363	0.173826080817188	0.158641769942471	0.164380007882231	0.167955805322846
13	13	0.21087782781033	0.20323193834821	0.213800384141953	0.192806979548733	0.18090218641933	0.16666827983064	0.21087782781033	0.155415346537184	0.180355173098632	0.169844259524669	0.150386335647669	0.183868436677595	0.158802454214268
13	14	0.202192178742192	0.197984583237529	0.200232357609032	0.180305814910519	0.179863976388773	0.168510302075157	0.202192178742192	0.165509664039835	0.169259791894959	0.176679194682466	0.147894393906601	0.163391634151371	0.157407238032326
13	15	0.260012806774399	0.189432707777196	0.196593360103132	0.17869789354146	0.176757060969152	0.165079245437147	0.260012806774399	0.162649188059702	0.195268672902333	0.167917855340023	0.1511921444929	0.181490791421205	0.163029843144285
13	16	0.288887838564778	0.191524404338537	0.206578594388225	0.186752528932937	0.178930859274637	0.164200336148265	0.288887838564778	0.155727992637653	0.193965057518727	0.152676424368283	0.157924775574006	0.189626801668155	0.174949629845193
13	17	0.209472832715908	0.195654529618322	0.201371066333849	0.179491716262534	0.17872907553179	0.165940104723697	0.209472832715908	0.172998459523651	0.192734063298721	0.156023583949776	0.156946321590715	0.163765800674325	0.199860928051101
13	18	0.1891974009957	0.199860239292571	0.212090307074863	0.193212938513621	0.18010982934992	0.165276094154575	0.1891974009957	0.166849884170741	0.189844494341759	0.154069905248075	0.155180673454382	0.128524572265114	0.203871486113504
13	19	0.177103915721793	0.202916483138645	0.20483465013471	0.17780180900541	0.179218529461064	0.165191925513288	0.177103915721793	0.17208380628355	0.192074488646729	0.156606256265364	0.162988238988304	0.0568646011075391	0.191743881809114
13	20	0.189832313620266	0.220010492938618	0.209782580935041	0.192405198065592	0.18104216412676	0.165068869289533	0.189832313620266	0.158237316203258	0.18167288324427	0.158893029341298	0.162486568861551	0.175742973416352	0.208747098820277
13	21	0.184337860647407	0.24396254473317	0.201616248781412	0.183571919465116	0.180293842103766	0.165926936163388	0.184337860647407	0.156881105710755	0.171361518289084	0.160245903412563	0.164197396381842	0.186412643658512	0.207635916408338
13	22	0.184065374831764	0.29676960673903	0.205530984411602	0.180522200621668	0.178127739109139	0.164404992555811	0.184065374831764	0.164421379541916	0.166118160014467	0.1612513933483	0.161483700708231	0.193128659277737	0.201750734234491
13	23	0.193992119673518	0.131282616546273	0.202764379780305	0.169014593065709	0.176870173150985	0.16570416923034	0.193992119673518	0.157600538105881	0.183727808934945	0.165533582889422	0.165633537332386	0.178296042147123	0.203744128416891
13	24	0.185409185638492	0.0616216974894101	0.214983905271513	0.194010988593983	0.178696558113344	0.165820613423173	0.185409185638492	0.181543724829175	0.181579566007934	0.170206764390367	0.169202376897649	0.159143340851773	0.205052495554875
13	25	0.199403850895224	0.134450839337734	0.217547705770682	0.205313386760408	0.182814426840159	0.163338771112898	0.199403850895224	0.166722301103367	0.189137149151669	0.164904273081432	0.164716139901725	0.108160056291453	0.195949576154128
13	26	0.199601090990233	0.118908434429962	0.219171699266424	0.204467095971768	0.182927762989579	0.169683986920906	0.199601090990233	0.167007717791288	0.17862588573622	0.168030222447205	0.173287087290924	0.0562345563720124	0.20135034910769
13	27	0.196397568863304	0.142597726882391	0.220545919343131	0.201913387107597	0.177745181872704	0.171004180755486	0.196397568863304	0.191633873562734	0.176714089597093	0.170307553121044	0.187746923275729	0.0216530863480488	0.200079454176848
13	28	0.214347213376285	0.179498483482907	0.149889595561611	0.199243868106272	0.178528897269019	0.167965796844957	0.214347213376285	0.161009700762714	0.181969931513568	0.158890821148426	0.191183277033271	0.190777062806879	0.198622447439935
13	29	0.201793382813189	0.022607934650401	0	0.200081070785667	0.177230195991724	0.168195500241337	0.201793382813189	0.169390289647438	0.195171409942439	0.149130764231088	0.182127212949249	0.213290970021499	0.203582863657283
13	30	0.201345743653671	0.0650476657332909	0	0.195290552444447	0.17680764792877	0.1686950632666	0.201345743653671	0.178231943742392	0.18999402798509	0.154734651800163	0.1770367726083	0.200674423890678	0.203039063392309
13	31	0.213889555190602	0.0178702606796882	0	0.19425000749401	0.176257940850834	0.16884671053579	0.213889555190602	0.185431007366627	0.186656111598958	0.153073366286276	0.188088902344175	0.183152108172148	0.199902871195212
13	32	0.204396851781759	0.0393261455384961	5.02410283339057e-05	0.188510881751983	0.176060622517075	0.167468282459515	0.204396851781759	0.176486071155757	0.180387917781424	0.163292555288837	0.188750955842174	0.171162622494758	0.202644975322531
13	33	0.206345588986286	0.0270985461063478	0.00468294938471476	0.20439043176368	0.177595180852559	0.167015832339325	0.206345588986286	0.187655872527398	0.171376461193224	0.156937737776985	0.194383116615985	0.162661928421059	0.195753283437967
13	34	0.200913196123731	0.00127294706867542	4.36982472074733e-05	0.223496226445638	0.174810226535776	0.164921106027776	0.200913196123731	0.170422964381903	0.182588472702505	0.163173917436695	0.198492279507896	0.154547698648329	0.196778084924177
13	35	0.220508581582389	0.0354296555063631	0.015703449626135	0	0.176581446351981	0.167631319354029	0.220508581582389	0.167944714704844	0.182717534628381	0.172912025201062	0.175630424991109	0.167548782201226	0.204257101826559
13	36	0.203492300364043	0.0150176295486356	0.0544161975799765	0	0.173993886810783	0.177659362151574	0.203492300364043	0.188873377520766	0.191380202008467	0.161993437306039	0.201939838938773	0.152645899369173	0.21142208699162
13	37	0.205597388293267	3.01886167600143e-05	0.0283055940867819	1.25273657939967e-05	0.173818593776144	0.170254144943742	0.205597388293267	0.167062309221525	0.163443780789532	0.160546407781967	0.206149300605594	0.190007298935569	0.203444326830141
13	38	0.208993152430733	6.92231362387098e-05	0.0878080676520609	4.09642984440696e-05	0.174052174312631	0.168268726927175	0.208993152430733	0.190998419388517	0.173796783447562	0.178610365800181	0.195784989680792	0.192259633482707	0.213297050405085
13	39	0.192342814212793	0.0959788981313455	0.084145536022999	0.0151752346134273	0.18426476062539	0.169889063088726	0.192342814212793	0.17295610746998	0.169851510863882	0.165492930651404	0.191782076246599	0.172731583079713	0.209625473257024
13	40	0.184205027413119	0.0509208705351484	0.141134593151838	0.174935009937303	0.171468018436658	0.17556203030973	0.184205027413119	0.169983931542649	0.181191175690855	0.167839920500033	0.19528234138625	0.183122597442165	0.187678447811847
13	41	0.18231857939575	0.00608125538558953	0.169329538406289	0.166598679915988	0.174927760416044	0.168534493318109	0.18231857939575	0.169767487905945	0.179155072903468	0.17482616618474	0.124250780806904	0.174313985568701	0.18751877220201
13	42	0.183191491956739	0	0.0922495148182561	0.161489412448272	0.174399625491196	0.167930926293714	0.183191491956739	0.167476601435184	0.193652432152646	0.171824634961472	0.205279487000157	0.186288123771905	0.178046437565495
13	43	0.18856517221741	7.14862051657748e-05	0.0671513965546254	0.185693950178523	0.172412961562352	0.167657438730064	0.18856517221741	0.175282793047918	0.194242379688639	0.173535072775232	0.208132226206049	0.191746368179589	0.187227266934241
13	44	0.188068202098155	0	0.147687142737025	0.191216642824174	0.172995604920278	0.166828185325712	0.188068202098155	0.165019429186125	0.16885546348635	0.165339105960742	0.209282019352217	0.210500922274045	0.186855486799556
13	45	0.190963838007379	1.65351394041992e-05	0.163451138061469	0.200702188478372	0.180368905048448	0.167784826176592	0.190963838007379	0.169324758233788	0.165944241189074	0.164937960981964	0.220105383690294	0.220923797844405	0.191408794740842
13	46	0.197362505304588	3.8676929344989e-05	0.179386684857956	0.194133172344103	0.190567915545544	0.169792787326333	0.197362505304588	0.18507281415897	0.168175170483069	0.15955584826208	0.201024027463537	0.234377125928683	0.180434619022379
13	47	0.203247435463887	1.37225814258498e-05	0.0644445667621718	0.196682326455858	0.174276273630596	0.176191827800388	0.203247435463887	0.163360924774319	0.17325729891261	0.158380589468865	0.189471830288268	0.224781003639965	0.180617118122085
13	48	0.219083644688399	3.46586812977933e-05	0.0881692911557644	0.211084938322004	0.181674971192308	0.169737939063952	0.219083644688399	0.160840439351014	0.158816996998187	0.156786309840758	0.220132537930547	0.209910414551849	0.174512455702762
14	1	1.18753139573821e-05	0.310183289929276	0.276628302990213	0.254980581051562	0.239713230347719	0.253474964679992	0.282408459425865	0.246025021540911	0.235056212194879	0.208043098166024	0.215212329971911	0.191127594638781	0.253474964679992
14	2	0	0.328290999935337	0.277074528039238	0.261684167941641	0.241759870287527	0.243631388957605	0.28882421565511	0.241739204443738	0.230171042664816	0.209858426595153	0.215119529736216	0.192379275453343	0.243631388957605
14	3	0	0.306006202583314	0.283811671829398	0.251967951822352	0.247757023652127	0.240245628933866	0.281693347178975	0.22913346350717	0.22301556851553	0.219772903153103	0.211357941194221	0.202568734244261	0.240245628933866
14	4	4.55663486932473e-06	0.314465328874564	0.281887084978668	0.248317240732832	0.24320195153838	0.255006626359347	0.281748123300426	0.237866726378115	0.227311060695742	0.210445328800631	0.211952230670853	0.20025720487347	0.255006626359347
14	5	0	0.312011086869402	0.285177601948479	0.257391160664895	0.247970793577321	0.2486217618641	0.275169361439134	0.235545214342937	0.227164967078753	0.22127939735439	0.210174325880741	0.183706732730155	0.2486217618641
14	6	9.46245113912468e-06	0.308030591256737	0.262943636633137	0.24711474995603	0.246646259143204	0.24468929979763	0.274587360583852	0.230605378182451	0.226672188109083	0.212615763251663	0.229685294923399	0.196189382068433	0.24468929979763
14	7	2.45377304325908e-05	0.307857917336289	0.267028025978473	0.259994495512159	0.248455189941393	0.245081207683841	0.264285777055476	0.23774424140971	0.231746967206158	0.212274032594943	0.231042017981035	0.215504149744323	0.245081207683841
14	8	0	0.311540363200829	0.261689139102751	0.253144582803852	0.256566049247776	0.260091144873177	0.263369325005691	0.233267128800883	0.230968966842358	0.226511359378072	0.222422905751854	0.198819808220672	0.260091144873177
14	9	2.27376049407825e-05	0.321484879883202	0.267815181743522	0.257228471203293	0.259942808919228	0.243808864795889	0.266626233090361	0.230599837373879	0.223329114576493	0.208474258463784	0.212668482464921	0.182359611022365	0.243808864795889
14	10	1.29352384320031e-05	0.325470663072981	0.267279873205947	0.272973299215614	0.243666744702983	0.253249327787872	0.265609138076618	0.230923720744508	0.221329649382539	0.216632249950202	0.210273855708034	0.175634630633597	0.253249327787872
14	11	2.76057538888087e-05	0.338502624036552	0.26234618167234	0.254914869574826	0.238829684460474	0.247905245017531	0.258667495481721	0.230454324395622	0.22318381077895	0.220190968269331	0.225902792215107	0.183945757659596	0.247905245017531
14	12	0.000912536928887267	0.336412998885839	0.271504761768181	0.264342937652269	0.254672764644541	0.236738630150484	0.248728379078012	0.231876300302289	0.2253288536994	0.226674109894628	0.225139220374746	0.189347166621615	0.236738630150484
14	13	8.46553679756342e-06	0.340232256880512	0.275100836114783	0.271313355345074	0.258619434549596	0.241142135680672	0.249282372319408	0.245092296355703	0.226116819075345	0.222908359404484	0.207473329156493	0.188520170541725	0.241142135680672
14	14	0.000499443150107092	0.342829647120197	0.265793459295277	0.264066701800847	0.251386961222016	0.23916511692986	0.249705365894965	0.241649215739672	0.226692080477808	0.2412371204039	0.213151349561706	0.191921568335512	0.23916511692986
14	15	3.44366847028443e-05	0.330160400475143	0.267619917803218	0.262699769187002	0.277476961495532	0.236609290961677	0.254794039947573	0.23351011650401	0.224934948998679	0.256762210015098	0.222410161714664	0.194533201935273	0.236609290961677
14	16	0	0.344404038565005	0.268408951845456	0.248589936685501	0.260399561959824	0.234627704372297	0.256765738931731	0.236736305932151	0.228350169054757	0.220532795053592	0.225009780554731	0.185867858012399	0.234627704372297
14	17	4.34880164781709e-05	0.356186432244634	0.260236771555234	0.254462455601044	0.260809533365514	0.237634441091601	0.260806445087132	0.235248214077304	0.233010822820429	0.249369815457087	0.209456425430682	0.193778901980432	0.237634441091601
14	18	7.42267061564354e-06	0.342171931287672	0.267917696480802	0.257395081883822	0.267065189351816	0.237476289418508	0.253874640737911	0.231726365202289	0.224811585994928	0.206913629003113	0.215215318612061	0.193851010673639	0.237476289418508
14	19	0	0.36757013127581	0.277915032669347	0.264496895342686	0.255800527994108	0.238125029447949	0.244911696267485	0.237676998942965	0.228031570429633	0.213356731353944	0.213488923133522	0.178516984305201	0.238125029447949
14	20	6.47810906475405e-05	0.353095272817212	0.271355532836556	0.264077434520009	0.248897791823621	0.235735617422082	0.246067183482291	0.239697253839389	0.228856040816122	0.212971210821418	0.213068569467922	0.180076739315259	0.235735617422082
14	21	6.43816589597713e-05	0.319004141048742	0.262351697564138	0.260045407255175	0.249920129038279	0.232566458427787	0.243927675665917	0.235675822639539	0.225751446349172	0.210508507578388	0.217225874083273	0.179587210896828	0.232566458427787
14	22	5.9235817940391e-05	0.366657233861227	0.258046375481942	0.254753823445729	0.251495428631136	0.238545041043584	0.245553127230921	0.23655323078943	0.236431400135479	0.210860101536613	0.216658055313643	0.181210290531253	0.238545041043584
14	23	0.000494765029931069	0.345760129568128	0.261758661157847	0.249554058168611	0.245330063859658	0.244278460394393	0.245389604760786	0.234257051187752	0.235542324319059	0.215866556272092	0.214760270600685	0.180403578600429	0.244278460394393
14	24	6.27754562390965e-05	0.307372149625696	0.265965044610288	0.25441044561474	0.262576911817089	0.238850010522878	0.244845086635944	0.231069103900757	0.231940350214229	0.222883268480744	0.210715909573756	0.185277172842732	0.238850010522878
14	25	0.00281715665038527	0.310355301994767	0.271414254527868	0.253201456088919	0.248282760841083	0.2451443795311	0.255794661658944	0.226984831011692	0.234338048827881	0.211956077992061	0.207891795752265	0.184525092307803	0.2451443795311
14	26	0.000109345028613728	0.32280849341125	0.259301195507968	0.25397247924963	0.255627543566721	0.2425007776452	0.242244016338851	0.232851144811154	0.230657659020012	0.216911843519642	0.210184137367202	0.185132557533335	0.2425007776452
14	27	7.99837385520467e-05	0.30922358316172	0.270729381377017	0.266725556547172	0.261147764445118	0.242211179624493	0.24196625539792	0.229513406507273	0.233782619925288	0.226331091334768	0.212824884344052	0.192249328463068	0.242211179624493
14	28	0.000578393502726433	0.30343712450736	0.252265426767396	0.254870180487797	0.255334667781159	0.236575076379931	0.246043346125364	0.23033730345364	0.228805803644156	0.215968711187066	0.212612805263699	0.189321731667244	0.236575076379931
14	29	7.69467129186335e-05	0.263398575495841	0.261322677570538	0.260950369457901	0.251202108475673	0.250486333478389	0.24600676815241	0.232383435315655	0.227553275868065	0.214744041229603	0.207680713329795	0.187923910164686	0.250486333478389
14	30	6.61441879363252e-05	0.282872230815771	0.265928797382043	0.262692774544741	0.253618795582841	0.241741147878275	0.246183382620354	0.231014164499172	0.23061945496854	0.210626364940452	0.218858021560273	0.181103677829833	0.241741147878275
14	31	9.4234786973231e-05	0.27737460969957	0.278191246600372	0.262720690098596	0.25718542723384	0.243154890103017	0.246312912959827	0.229037740530232	0.236727802745633	0.208892253460255	0.212270704069024	0.190747837641593	0.243154890103017
14	32	9.6068238477253e-05	0.27025083761381	0.309983348713882	0.26365568881479	0.257134459609958	0.235266451872137	0.24714676482072	0.23515546415888	0.232054439476925	0.214039236095741	0.22031264671079	0.191156671962952	0.235266451872137
14	33	0.00011059168195798	0.272081946439628	0.277074753372334	0.264885366459928	0.261401615657846	0.246438104801328	0.242521117960371	0.235601897140662	0.23094395893766	0.209648750299479	0.21834410365474	0.184106689682218	0.246438104801328
14	34	0.00114049821957544	0.264179790019557	0.282252982556228	0.273919212945203	0.259436155914442	0.235025664956422	0.24582374134329	0.230256825942514	0.231415067363194	0.211160796383014	0.216200720813518	0.187745932709304	0.235025664956422
14	35	0.000127300277971278	0.296234786334967	0.323235348392743	0.265248120434547	0.252170197798205	0.247918205719852	0.248676767928845	0.230403534592644	0.230322455497717	0.205844892970444	0.226856943142797	0.195359714479792	0.247918205719852
14	36	0.000127126999113245	0.281227200807301	0.298684370200345	0.261051854550848	0.253508825928143	0.232648550495166	0.248237005864944	0.228108410293657	0.222239724357844	0.203514965077233	0.212589838506332	0.188933525957423	0.232648550495166
14	37	0.000141439333254247	0.292100371193332	0.291243361301463	0.270237022740462	0.262154540735582	0.2349040313541	0.251686641788697	0.230050298457923	0.24301123205627	0.200511917769072	0.213891086833343	0.184020746211232	0.2349040313541
14	38	0.000132639623778147	0.281545974179614	0.285842194986866	0.266395011694249	0.23986111778558	0.238313062928854	0.247952836761011	0.226443788262117	0.255509949973162	0.213588579638041	0.215625235674331	0.185280020291258	0.238313062928854
14	39	0.000117342061507862	0.286915247643051	0.27784071673711	0.256916280145856	0.246553760847502	0.254868674644757	0.253877150529564	0.232388584112696	0.241747321770089	0.21705007279108	0.216195031403614	0.185559431122358	0.254868674644757
14	40	0.000146219201308898	0.268154844476549	0.291426004458818	0.261744516260573	0.257823928584508	0.253171586847181	0.247832409702646	0.226063825710776	0.250140152906084	0.211176331392081	0.223259572074899	0.187817216209724	0.253171586847181
14	41	0.000140371899941641	0.291805251865312	0.299491052963744	0.259097015479512	0.266297547033393	0.250706908279631	0.256362885281297	0.231927828293869	0.235484209948272	0.223314616505478	0.20564851316019	0.190405708828961	0.250706908279631
14	42	0.000155585834461442	0.259889121698562	0.291599051734012	0.242353878152587	0.263325917261331	0.269682965604467	0.253288721062726	0.232956750083962	0.22011982693584	0.231911728106662	0.213604554679991	0.184526860863689	0.269682965604467
14	43	0.000158287201558253	0.255773188447808	0.286099108037951	0.259793845804456	0.2619928007883	0.256420900541408	0.25418546103068	0.234065974601245	0.230273069325846	0.217073917932836	0.215961344065526	0.185846631667261	0.256420900541408
14	44	0.000744024470072513	0.269844840757515	0.289281278654971	0.253883622815084	0.258160847441276	0.236170981674794	0.261529367582456	0.23388469372523	0.22840316490184	0.210203363598822	0.208519345447756	0.185464013010963	0.236170981674794
14	45	0.000168756195154172	0.272095947821126	0.306997994293782	0.262851230710437	0.259213555189296	0.245586388776262	0.25617432036592	0.228767049595697	0.225210659646892	0.212018716685671	0.214656358131119	0.184431939082962	0.245586388776262
14	46	0.000173578625081648	0.292764674498951	0.313903731158773	0.261762587153446	0.258249221461242	0.236088983593084	0.249410729704838	0.231066672276665	0.222762429434788	0.204669420218028	0.215286505285783	0.188739735543986	0.236088983593084
14	47	0.0235729278174972	0.279054975019423	0.3442611344785	0.248967398042143	0.257651680663717	0.242046541969647	0.248885399194692	0.230952796989781	0.220832010151827	0.21184754175753	0.213875319497712	0.19749204893707	0.242046541969647
14	48	0.000176931865332801	0.286370583417427	0.342717440160328	0.256168151991418	0.254954530302501	0.242829825178722	0.248834576756331	0.229355184324996	0.229566015276819	0.209627778593108	0.211549767123688	0.185415291563171	0.242829825178722
15	1	0.186441610092453	0.273169455851347	0.242736511314893	0.250254762319483	0.232613274038724	0.225555527495885	0.186441610092453	0.251263612242543	0.25042245857674	0.225435707854723	0.223009646649569	0.206280019641969	0.198517581218712
15	2	0.171749084971845	0.2723698120274	0.243508543856146	0.252883035733931	0.225656785031937	0.221567676273336	0.171749084971845	0.259262767363455	0.244724155881175	0.219985903943731	0.211644001937735	0.195611743985741	0.196522253561057
15	3	0.211595236108739	0.265095023142111	0.255635636839975	0.251600829915441	0.247420114628602	0.222307265262675	0.211595236108739	0.246658400880892	0.245613064294131	0.217649890955413	0.229790955227977	0.196897179071402	0.192031057634377
15	4	0.173544968329962	0.23764191735525	0.249526129480052	0.242953074931048	0.244584728184137	0.221171090974123	0.173544968329962	0.24812736914114	0.250922794881455	0.221999880501577	0.220524071121735	0.197940543418131	0.198326408620583
15	5	0.167511585027837	0.234839043286716	0.249262502407955	0.248669162798203	0.246161642852851	0.213442126782717	0.167511585027837	0.26224612472646	0.249054125642354	0.217650302300041	0.230134594639349	0.190330413299043	0.201082131134728
15	6	0.16748889171986	0.26787825305354	0.255862020150503	0.226046434944155	0.242981251699331	0.224304596710973	0.16748889171986	0.249133118446101	0.248141829596543	0.219863021366659	0.225813709047668	0.195500971237374	0.197499409342225
15	7	0.168931630749276	0.255349193878648	0.236705587780125	0.231427759990667	0.242887921581263	0.21446893690004	0.168931630749276	0.245422907576901	0.247210283531241	0.228458301229314	0.233028368056564	0.20243238781922	0.197769726902927
15	8	0.190487229316755	0.251850993349099	0.251812003585501	0.232939048128568	0.235408377575069	0.228136785634949	0.190487229316755	0.258282577933368	0.250457788523281	0.225538077757218	0.235145019809382	0.197374180503787	0.196164537611103
15	9	0.165489537416709	0.272660976445331	0.243662415441733	0.223963684454197	0.241447138420793	0.211443890105531	0.165489537416709	0.259497962960435	0.242865585159272	0.217112010199239	0.225048418978769	0.19267521507001	0.209795889696009
15	10	0.159091393723957	0.264283662374188	0.246882582583208	0.226017147665202	0.229908681801337	0.229533335032834	0.159091393723957	0.25508698811425	0.244892547556063	0.219806892303604	0.234706272503361	0.195280836859351	0.223465192581756
15	11	0.162838867304119	0.250439709635695	0.256571687715396	0.242167836197105	0.242563680194239	0.212837224158958	0.162838867304119	0.261844979774588	0.241815165474039	0.217669742254759	0.231010933794514	0.196470702555705	0.228497807343273
15	12	0.181974137665081	0.281673108796078	0.250979750799989	0.237319957139995	0.237470460423579	0.217047670794167	0.181974137665081	0.256770083196754	0.243861031723392	0.222508956251756	0.225956235423316	0.198342440754672	0.225737490074889
15	13	0.1671088450237	0.283553230646887	0.252020376916166	0.239724147761427	0.234179017481733	0.220141359101169	0.1671088450237	0.248831757327727	0.237034339261475	0.212428812353808	0.227792689161428	0.186674781264172	0.217599999287561
15	14	0.166621738523633	0.243429544284306	0.263253351834509	0.233303934662674	0.236297931362858	0.219608995465256	0.166621738523633	0.257805768683376	0.246970847211383	0.229517733734781	0.241120136807715	0.193395869382679	0.222644258081119
15	15	0.17522121773129	0.246497343968132	0.258909518299194	0.236697707506241	0.237490529135641	0.219521453237074	0.17522121773129	0.255488592565101	0.242691488074144	0.214922412249582	0.22646494455435	0.196174508733092	0.210831501595281
15	16	0.169491614171667	0.271472719202168	0.256580605932943	0.244339096273402	0.248612011968323	0.224936073496373	0.169491614171667	0.248135362850529	0.246460555264746	0.218137066373719	0.228765337693513	0.201361273078176	0.21576486185486
15	17	0.176179789824667	0.248584382054164	0.260154646541629	0.233876924430875	0.239767820411875	0.211662374721439	0.176179789824667	0.261473041952759	0.245370900561832	0.217045406737124	0.223404315961565	0.194374488335134	0.204427112918677
15	18	0.222171588226172	0.232859535927294	0.255396428134772	0.233668738225471	0.230891806810486	0.222273572993778	0.222171588226172	0.260932162754084	0.25265398403937	0.216022102980059	0.228730352505385	0.199578487187282	0.213148382409031
15	19	0.225939488794166	0.266385818793557	0.247121658901189	0.241332332653239	0.234605904663306	0.21289139403454	0.225939488794166	0.250787580132856	0.244544622078683	0.219547858775363	0.232095548748356	0.191057176297573	0.226285139323658
15	20	0.23086795992266	0.245308160831915	0.260394845537354	0.251982231243776	0.234000332572869	0.221816182674938	0.23086795992266	0.2492603886537	0.251633791051444	0.213873588360972	0.225278330632267	0.196306405277243	0.232531320599245
15	21	0.241520568198747	0.246554582896023	0.253697758002514	0.24692261090294	0.238876790887382	0.209234361791987	0.241520568198747	0.254800635460232	0.253289620564686	0.215798368308701	0.232152726823623	0.195823588532204	0.224609613496284
15	22	0.238935393368746	0.252582020464636	0.246402390448906	0.243454905419176	0.234062722935653	0.226211772664563	0.238935393368746	0.259386845285179	0.254843555651314	0.21600506749351	0.234729377649107	0.189521199484404	0.218715701681366
15	23	0.262753509651629	0.271492287929124	0.246144122485317	0.249616606133444	0.240455310357256	0.221919684895486	0.262753509651629	0.248066443714479	0.248887504290887	0.210451474805786	0.239463215667645	0.200174307649774	0.217695648243245
15	24	0.253276067769025	0.256140211500029	0.256022225993126	0.243386752834373	0.241558954729511	0.223161507597912	0.253276067769025	0.251144249672607	0.245816566892176	0.211496207685784	0.23052087916118	0.195443801880817	0.220992375844607
15	25	0.249353386484082	0.24967810539331	0.254359532609421	0.234790206651105	0.238302332305601	0.214844049114907	0.249353386484082	0.255630247031045	0.247932475730586	0.210711581276004	0.235468250937987	0.189368192420403	0.239727025178669
15	26	0.242372646414795	0.25210423331481	0.264733275120029	0.230439768451605	0.240008657787754	0.223347297672881	0.242372646414795	0.257473998575803	0.250227963205152	0.205805223878864	0.226801922038687	0.191204643349019	0.237889360164474
15	27	0.249115560576169	0.262738347790313	0.26735086266573	0.232007664370065	0.23555250843804	0.222601390309699	0.249115560576169	0.241439094441692	0.248701664369301	0.216533793009628	0.220725212994539	0.197978674145055	0.245477344362713
15	28	0.231894588920356	0.268419007574151	0.262890926055564	0.233270126919832	0.239552813057926	0.229469705231857	0.231894588920356	0.249849821438536	0.250339316172565	0.210944561805353	0.24118588469585	0.183173014294366	0.246213694832686
15	29	0.233128693282208	0.279293384101836	0.270451456669489	0.24251123589896	0.233884518195784	0.223754139866394	0.233128693282208	0.243379025625105	0.246899671076873	0.210863723756461	0.240787594488196	0.196436488527825	0.241425933098532
15	30	0.250792724841453	0.283855065171682	0.234959634561085	0.240568890618061	0.245020833327788	0.226414962629999	0.250792724841453	0.238875235643882	0.250916895566195	0.21020356848492	0.232925752412371	0.194378201688365	0.236614087360275
15	31	0.260434944501169	0.228675905050939	0.220336901945728	0.251190534580303	0.236025502233366	0.227508313315517	0.260434944501169	0.251681210583789	0.250830854588643	0.218529400997377	0.226783229444853	0.184994058843652	0.242717815743735
15	32	0.241041278855516	0.242726683228263	0.209233349040552	0.242012984559037	0.234524029971703	0.221238163673602	0.241041278855516	0.248940365273951	0.245577143387929	0.210604919793852	0.235506318457808	0.200838511413988	0.24374963788602
15	33	0.262198800965898	0.246105865230743	0.217817239311449	0.239318317045652	0.239518362173929	0.226168963947846	0.262198800965898	0.250165967217786	0.245111170361865	0.206959360786993	0.221013143906794	0.189028192489625	0.24585619215672
15	34	0.24701681347195	0.22309012608998	0.234736922652274	0.24505025554876	0.246267680552655	0.228458051049163	0.24701681347195	0.242973067883253	0.242056036316857	0.214190494645119	0.23074286168249	0.199504805236849	0.256679428962689
15	35	0.247136963624468	0.183973986312428	0.224593121038227	0.236092455834806	0.239523485558352	0.224329117869707	0.247136963624468	0.239175647468445	0.250573123799639	0.201270500787514	0.228851099934835	0.19410148114018	0.261248219189531
15	36	0.238885717355253	0.195303101432057	0.225614832672737	0.245447953735633	0.233028305635378	0.226605492081332	0.238885717355253	0.249063956859337	0.24080478707561	0.202982699855881	0.222100935548683	0.190667026391196	0.259932544299585
15	37	0.251387223166749	0.179591778251693	0.228516998626882	0.243690233949151	0.240190346285317	0.227100121389807	0.251387223166749	0.245524679785365	0.241918616728023	0.203733992406086	0.23066949486709	0.198930552045074	0.261785103569325
15	38	0.244162487357786	0.181943608923259	0.232838126173882	0.249433726719654	0.233923634135885	0.230612839644696	0.244162487357786	0.246601002763579	0.239922076068822	0.214990710877805	0.225821365093033	0.196636415896927	0.256292920305634
15	39	0.231986139866051	0.185884379142017	0.218375929748241	0.241354045824706	0.240629804764899	0.221986268314492	0.231986139866051	0.242420481908617	0.240149329649735	0.20702496149261	0.226983838534672	0.188261342010221	0.253248888534413
15	40	0.239566633279964	0.183961428735992	0.225680778513121	0.253312051385043	0.241968174362027	0.218892261365488	0.239566633279964	0.239088433132796	0.239452180447889	0.198287199999044	0.223302548388962	0.197365517605886	0.255069238423167
15	41	0.237111764671489	0.184124179810618	0.243231613936752	0.237008915884731	0.240641183692224	0.227259904990855	0.237111764671489	0.247462119838104	0.235879584552231	0.212957469874297	0.215556142337679	0.194208998316161	0.253275216890795
15	42	0.265922365455545	0.197135226685286	0.243160058340436	0.2555037043353	0.240761995089794	0.227051421346063	0.265922365455545	0.243763234338776	0.237060078098878	0.200468118128451	0.205767568026477	0.186573844165751	0.252963088165141
15	43	0.239344421263574	0.19575845324923	0.233776990702518	0.262246686729247	0.237950151768573	0.228249770543517	0.239344421263574	0.245523125723963	0.232371390093943	0.232294210230417	0.199270898321983	0.193095074817045	0.26091951455583
15	44	0.243541009276809	0.193195278416804	0.233556881925033	0.251220233756427	0.248753477996999	0.233250099260616	0.243541009276809	0.243176536035538	0.229623939037186	0.237124866340082	0.19641000469268	0.191930525965903	0.253254618782138
15	45	0.247383645538224	0.201289206820294	0.232259940450952	0.246827917205667	0.246896939836392	0.224702000400785	0.247383645538224	0.236546964726747	0.227943925997792	0.200976780017816	0.201209454419602	0.196781109105621	0.256354202774693
15	46	0.230577880403557	0.201154931180902	0.226930399798903	0.261968742015322	0.239666837580489	0.230096020308523	0.230577880403557	0.244187612940094	0.22085467909788	0.220938210944533	0.202630054529447	0.189453188465816	0.264394337387068
15	47	0.239970825711922	0.202982075052776	0.227734638351636	0.244937884577545	0.251113526047188	0.226230249335664	0.239970825711922	0.24359508711225	0.229255549364002	0.217664467723805	0.196792333669897	0.18810839953851	0.253127731807591
15	48	0.229918062844982	0.206782551379223	0.229537636911676	0.237181778789234	0.247703608088839	0.233482080693832	0.229918062844982	0.241002264787776	0.227469205207762	0.204379483701922	0.198722233506306	0.222804723532278	0.263336194072392
