# Supplementary material for: Two central pattern generators from the crab, Cancer borealis, respond robustly and differentially to extreme extracellular pH
Source: eLife journal article supplement (doi:10.7554/elife.41877), 2018-12-28
Supplement: supp [file elife-41877-supp-v1.zip › elife_poa_e41877_Figure_3_source_data_5.csv]

bin	STG1	STG2	STG3	STG4	STG5	STG6	STG7	STG8	STG9	STG10	STG11	STG12	STG13	STG14	STG15
1	0.762289690397839	1.13200950111914	1.12330394326278	1.10691063013412	1.19224512823067	1.29225798939809	1.31900071140219	1.28859257043259	1.10429341567471	1.35202590690541	1.34109065515873	1.43158360778373	1.52659985852555	1.61005767541875	1.83924281942435
2	0.759470673059282	1.13285441258838	1.10998448648258	1.10308601294745	1.1994509721136	1.30334552914595	1.32506329490945	1.29143138971806	1.13825570284879	1.3592059963393	1.35540707073774	1.43577536858187	1.50462144766462	1.60988106544971	1.83247059789728
3	0.756215197726538	1.12755861107718	1.1287050159124	1.1454875253435	1.20625775571905	1.31148695253506	1.32272529651073	1.2932136974199	1.16940889822091	1.35212586453555	1.33889263162331	1.43600336639181	1.48180924359247	1.60433534652164	1.84299337638392
4	0.750249212176986	1.13763511828394	1.13531192134781	1.14199589049071	1.20263467007921	1.30980731506905	1.33134285902943	1.29800955900274	1.18181496854841	1.34893113378984	1.34308654070141	1.42660423764008	1.44788063754776	1.60037544142112	1.83114815396603
5	0.75765687720675	1.14383300546729	1.13014184814201	1.13181414435047	1.20400978123133	1.30654456036868	1.32816648884207	1.30405072734707	1.18868970343256	1.34859329518217	1.34748007679627	1.42842850257144	1.42277944940504	1.5948070933692	1.83048128909546
6	0.758887731589036	1.1438988585158	1.13717493112786	1.12624888740514	1.21115747602275	1.31367167047967	1.3207900124892	1.29699791334211	1.21288542320306	1.3479677058562	1.34762257188454	1.42987006560092	1.4299408343332	1.59514517759379	1.83628833757261
7	0.753683588790985	1.13877456052401	1.14473979652025	1.12644417723316	1.20690602199387	1.30449367112325	1.3191668306105	1.30443865937334	1.22199523436353	1.34871245176755	1.36043513131268	1.42633448853666	1.44823483273269	1.59864115327152	1.82435150005492
8	0.7492134684429	1.12980269593025	1.14793329389145	1.12350319837654	1.19134265831476	1.3113511672606	1.32760221924787	1.30518215369514	1.23509466231026	1.34644020715403	1.34903465988423	1.43026190210075	1.46568388999455	1.59505955575783	1.83127182108123
9	0.747900641813872	1.11932962095237	1.15089545049911	1.10301622529581	1.19185148182529	1.30544512899384	1.33711196477829	1.31331825239217	1.25732214294699	1.34819813350997	1.34002761800148	1.42748237399193	1.51202410553168	1.59598500657296	1.83094799295321
10	0.756923603819938	1.12390641416637	1.14313568812113	1.08929084078658	1.19575602527948	1.3066958719749	1.32604631057748	1.31186585983691	1.27354316143579	1.35090088433689	1.35067986836026	1.428570002983	1.52319059430864	1.57703364631639	1.84301971667913
11	0.74741289624564	1.13132369226345	1.15086615710402	1.11175551186228	1.19613004860637	1.28826235458414	1.32457568413378	1.3124849077175	1.27540721405181	1.35020512942801	1.34655811151347	1.42969826406914	1.53676742288639	1.57946053450308	1.84566951176639
12	0.75260540356294	1.13264534158988	1.15428427139395	1.10739300563982	1.20850130576446	1.28737617554632	1.31548416458977	1.32229930711864	1.29090015733371	1.35375748990675	1.36454060414817	1.43404857891422	1.53135050648464	1.57284156682837	1.83356572267815
13	0.764159004693273	1.12786566708741	1.15558267265796	1.11235830997352	1.21463240368952	1.28174153360841	1.3172137526532	1.31653749675169	1.2949746488762	1.3536761598761	1.37657798664908	1.42925595024743	1.52980358894578	1.57066745771259	1.84927455056138
14	0.759637915013579	1.12676753224937	1.16047717916854	1.11420265908583	1.22113212882426	1.27186251588581	1.31461437167622	1.32413355138426	1.31258839066192	1.34733623920121	1.37458655067659	1.43233500855873	1.53391004150803	1.57334664462593	1.83913241818877
15	0.754693767255201	1.12656166376717	1.15129453962717	1.1044584961618	1.20429323697548	1.2722668448657	1.30625643287243	1.31272872993923	1.31754185017123	1.35721966820883	1.36110530248701	1.42936437227698	1.53241480598459	1.56542356142903	1.83441244655122
16	0.754394912581475	1.12913618183774	1.15134004227	1.11844642432448	1.21225206127237	1.28038041863744	1.29650806306022	1.3137144525643	1.32304939550945	1.352740905634	1.3633182188707	1.43954464986204	1.53951306782421	1.5570380854966	1.83586349428918
17	0.74793976914878	1.1445042940312	1.15842884064251	1.12756631364909	1.20849970499229	1.26976516102413	1.30474353101707	1.31884592770578	1.332436214388	1.37015155155417	1.35844271626451	1.44274847836825	1.55141237853199	1.57030609099606	1.81145885053774
18	0.745740015998748	1.14876803781125	1.15320410318725	1.14386303369294	1.20091413383589	1.27295161938986	1.29957405795885	1.3180476353848	1.33089273044516	1.36943808505512	1.37142143408163	1.44464761806606	1.54656581805405	1.56124486416934	1.802971832613
19	0.749976770438309	1.1469038302279	1.17289869422871	1.14255864856627	1.19835875416507	1.26628436908435	1.29839237179472	1.32465581758934	1.33909587131727	1.37799079741976	1.36987321746875	1.44687611382904	1.53434413407841	1.5658505181501	1.8059146839085
20	0.755946716681027	1.13594465654351	1.16526853721465	1.15726056856977	1.18937503711471	1.26696695170091	1.3081594200062	1.33246733651475	1.33972280415492	1.38293021554989	1.37827916987194	1.44959172693268	1.53409719901611	1.56658750805984	1.79691926791
21	0.75265343233716	1.13049117765573	1.15745167375005	1.17930521611084	1.19221844749658	1.25912780310769	1.30942311400341	1.32932557882254	1.33480429094197	1.37555509586051	1.43021332101022	1.45494877992885	1.52260340528644	1.56534336210325	1.80035513198491
22	0.754361942196578	1.15028187593294	1.15886212471106	1.18154524325273	1.18729559707678	1.26544767287727	1.30180551642318	1.32225810057554	1.33340332097017	1.36513206305904	1.40114573562679	1.44461432741617	1.51257638576854	1.54418773146753	1.79113039800029
23	0.751721362737962	1.16796405098571	1.15759866975751	1.19211496463765	1.18293925177062	1.25619127869252	1.3120578937501	1.32910113874675	1.3287544700657	1.36717353908192	1.36755938539611	1.45053483207021	1.50727665153019	1.55134880598158	1.80985882760109
24	0.754033432636554	1.1599232519178	1.15818589885342	1.19180755672204	1.18061099538396	1.27359604492796	1.30448763375007	1.31778546848851	1.32995480759241	1.3708894280016	1.36250577783545	1.46207539109675	1.50947926174435	1.54383569742718	1.79611344449893
25	0.757912741171808	1.13086191047942	1.16229436095962	1.1997974303928	1.1807072297264	1.26835527180337	1.29016598883235	1.32195332927606	1.32826213679236	1.3651951583848	1.36130805019518	1.45544339873909	1.51571242678665	1.5630423175679	1.79008245474991
26	0.758594886161341	1.14702535401867	1.15947282276519	1.19660470578537	1.18013557190908	1.26318416844673	1.27170239915914	1.32429541035184	1.32228091809746	1.37266497022912	1.35786672125596	1.45462999364359	1.51980325295565	1.55255004994612	1.78738981985015
27	0.762768086437626	1.13279811082083	1.16650102329147	1.19559100961991	1.17745923778161	1.26007816155113	1.28723784117029	1.32278029501216	1.31765659819298	1.36536804453283	1.36036471996242	1.44773685345735	1.52194144683977	1.54398788326883	1.78145922250358
28	0.759892190378009	1.14081292732374	1.16240496636681	1.20665042909824	1.1784841566241	1.25586613001781	1.29924163618169	1.31821751273999	1.32113218913148	1.36091352492885	1.36143938188461	1.45675438101497	1.52486234075575	1.54831148525263	1.78638685166987
29	0.761658884825985	1.14876646328433	1.16098128272177	1.20150030208895	1.17053306405323	1.25789597624613	1.28680296140119	1.310351396707	1.30471793364359	1.36554381725614	1.35611163527635	1.46416055216817	1.5168233226227	1.55130123658327	1.78594399253405
30	0.762312922465757	1.14857641208751	1.17159031143213	1.20276489216338	1.1767546323742	1.26676322673969	1.30295504506977	1.31690699621602	1.32631400861951	1.3632900540133	1.35533825292499	1.4577701283931	1.50640077559931	1.55097617923901	1.78917096376221
31	0.773796105250083	1.14439591192006	1.16103249751746	1.19417756748497	1.17407200365877	1.25573587443303	1.28517711261224	1.3101305604056	1.33969278584243	1.35935297766505	1.36169813924675	1.45914568214099	1.49435605699331	1.55189418735889	1.79240245743419
32	0.768049983735888	1.14391907158267	1.16431666164774	1.18052466194123	1.1724934722463	1.23950961720536	1.29403026258985	1.31171029892447	1.35421898221399	1.36304879568383	1.35820360416311	1.4613039212288	1.48669897668963	1.54261647583148	1.78095895535448
33	0.763783832602562	1.15003012618588	1.16663847190677	1.18536539833544	1.16627833380591	1.26405420573145	1.29318566598553	1.31239236542997	1.36704410166628	1.36389557148298	1.36668016816734	1.4562008875361	1.50056094762159	1.5301752668636	1.78985696430987
34	0.763877799553143	1.15632246849663	1.1672116569456	1.1891307705455	1.16444150956307	1.24227730119512	1.2922359123172	1.30644629550618	1.37144731080969	1.3624324731288	1.37402589476937	1.46501614872254	1.49470634483283	1.55230490660497	1.78833588340927
35	0.76054739374786	1.14784160806347	1.16680152206405	1.19221638137086	1.16702044038999	1.23189597274477	1.28587307470428	1.30984909170606	1.41242173640884	1.37154698277521	1.35655722566916	1.45580640840165	1.4963749708201	1.54134703416326	1.78546792031271
36	0.76684470849582	1.15374727922204	1.17327705594582	1.18860272982147	1.16668785746777	1.24388425591106	1.27230044974076	1.30703879086374	1.40951443365644	1.36762526746459	1.35844999917821	1.46495164969719	1.50008230871941	1.55221192396229	1.78597994295468
37	0.76377808468243	1.14928396430314	1.19921843710003	1.1879481153111	1.17368679674728	1.24590263547599	1.28094116281471	1.31304151610491	1.38902133523721	1.36445662064788	1.37711663457553	1.45332443541508	1.51915696643649	1.53238236519228	1.78689356774469
38	0.771339299634025	1.15326307976516	1.20862114493303	1.19358425308464	1.16586807297255	1.24135812783208	1.29333148241582	1.30736958931763	1.41184059827375	1.3571439432456	1.38364806081701	1.44614995752501	1.50364844203701	1.52482531326309	1.78509370980272
39	0.769416856958191	1.1493130797472	1.20658954423492	1.19620265042845	1.16419299042213	1.24776427237572	1.28534622616279	1.30236867302098	1.40902095242372	1.3595887194806	1.38015324394115	1.44913042421225	1.50479633840079	1.52612920490437	1.78441911998065
40	0.771193533687059	1.15682458919512	1.19529912031417	1.18524719326184	1.17459876543833	1.24128044250037	1.27535618599435	1.30691981720492	1.42899475723567	1.35592886367785	1.38285336625679	1.45801225746459	1.51792999626234	1.527090388157	1.7941743530859
41	0.774110822122964	1.16041005853843	1.11336944223817	1.197408908135	1.16184366363311	1.23767938639084	1.27407555099099	1.308542973198	1.43227709281827	1.35034618009501	1.40323123321126	1.45166790977581	1.50792258304627	1.51680013576416	1.79205866059585
42	0.768808514411115	1.16148484136289	1.16036650404014	1.20396968457276	1.1592572658608	1.23483051731164	1.28346775160166	1.30193751525302	1.43442729867253	1.36112184618934	1.39769328104846	1.45253680709707	1.49270238765564	1.51085428861668	1.79102813852426
43	0.771937830214269	1.16139486271433	1.1475797826654	1.1821277216335	1.16886999538071	1.23833158818315	1.27930507294811	1.29865803128238	1.43453172991131	1.36045467077624	1.39270649767702	1.46340228510142	1.47967495484529	1.50559614855658	1.8152588493833
44	0.779446482007532	1.15917222449274	1.20029845049248	1.19052739120571	1.17203158381938	1.25180477268762	1.27750985299277	1.30045771217446	1.41758635249971	1.36952244401898	1.3923790449407	1.4645906840747	1.62695910282392	1.49675611446661	1.81797811350811
45	0.777085477998448	1.14223616855348	1.10487038626603	1.19532048170489	1.16569227441802	1.27247242009199	1.26956509288988	1.29503852753538	1.42563928562521	1.36812819641514	1.40318162986494	1.45241699208179	1.62188264706894	1.50775648053408	1.82117871265867
46	0.780650478650163	1.15271558533844	1.17178798911097	1.17867208761939	1.16981761927378	1.25963613650086	1.28073403509098	1.30010567920737	1.47957118997645	1.36719586001059	1.39705454910372	1.46280170958751	1.59662743543878	1.50877262368987	1.80987691385381
47	0.780641330565778	1.16413697212489	1.18945110648854	1.19904339561621	1.16295050301573	1.26000304560632	1.2912226674298	1.30408464217087	1.45983327443789	1.36672291440564	1.39420692146056	1.45342789624385	1.54710507967487	1.50949490118742	1.82336579695702
48	0.773994146502532	1.16532072292581	1.15360746223154	1.21025215206997	1.1513026218382	1.25039844656588	1.29700345521957	1.30765881266472	1.4015375104614	1.36148728520513	1.39139018817447	1.45818688912396	1.56219490777217	1.49951169324403	1.81207656007911
