# Supplementary material for: Two central pattern generators from the crab, Cancer borealis, respond robustly and differentially to extreme extracellular pH
Source: eLife journal article supplement (doi:10.7554/elife.41877), 2018-12-28
Supplement: supp [file elife-41877-supp-v1.zip › elife_poa_e41877_Figure_3_source_data_6.csv]

bin	STG1	STG2	STG3	STG4	STG5	STG6	STG7	STG8	STG9	STG10	STG11	STG12	STG13	STG14	STG15
1	5	5.25	4.6475	5.375	4.83333333333333	9.38461538461539	8.07142857142857	4.07692307692308	4.25	2.66964285714286	4.14285714285714	4.26666666666667	2.875	3.88235294117647	8.76315789473684
2	5	5.13636363636364	5.52	5.5	4.66666666666667	9.92307692307692	7.92307692307692	4.07692307692308	4.45454545454545	2.57142857142857	4.38461538461539	4.25	2.93333333333333	3.8125	9.13888888888889
3	5	5.09090909090909	5.52	5.13636363636364	4.54166666666667	9.92857142857143	7.65384615384615	4.03846153846154	4.83333333333333	2.5	4.42857142857143	4.13333333333333	2.86666666666667	3.6875	8.92105263157895
4	5	5.04166666666667	5.64	5.04545454545455	4.38461538461539	10	7.84615384615385	4.03846153846154	4.63636363636364	2.51785714285714	4.30769230769231	4.28571428571429	3	3.84375	9
5	5	5.27272727272727	5.61	4.875	5.25	9.92307692307692	7.71428571428571	4.03846153846154	4.66666666666667	2.51923076923077	4.21428571428571	4.21428571428571	3	3.8125	9.05555555555556
6	5	5.08333333333333	5.52	4.95454545454545	4.33333333333333	9.61538461538461	7.80769230769231	4.07692307692308	4.58333333333333	2.59821428571429	4.30769230769231	4.32142857142857	3	3.84375	9.02631578947368
7	5	5	5.4175	4.81818181818182	4.41666666666667	9.46153846153846	7.57692307692308	4.11538461538461	4.69230769230769	2.63461538461538	4.21428571428571	4.13333333333333	2.85714285714286	3.6875	8.86111111111111
8	5	5	5.07	4.5	4.29166666666667	9.92307692307692	7.69230769230769	4.03846153846154	4.91666666666667	2.58928571428571	4.30769230769231	4.17857142857143	2.66666666666667	3.53125	8.94444444444444
9	5	5.125	5.17	4.68181818181818	4.58333333333333	9.76923076923077	7.92857142857143	4.07692307692308	4.84615384615385	2.61538461538462	4.35714285714286	4.10714285714286	2.33333333333333	3.78125	8.91666666666667
10	5	5	5.28	4.55	4.59090909090909	9.84615384615385	7.57692307692308	4	4.75	2.63392857142857	4.23076923076923	4.07142857142857	2.46666666666667	3.53333333333333	8.92105263157895
11	5	5.22727272727273	5.2525	4.54166666666667	4.5	9.69230769230769	8.07692307692308	4	4.84615384615385	2.47115384615385	4.35714285714286	4.13333333333333	2.66666666666667	3.78125	9.08333333333333
12	5	5.09090909090909	5.07	4.68181818181818	4.69230769230769	9.84615384615385	7.73076923076923	4	4.76923076923077	2.55357142857143	4.23076923076923	4.10714285714286	2.625	4.0625	9.07894736842105
13	4.875	5.04166666666667	4.3175	4.27272727272727	4.91666666666667	9.84615384615385	7.92857142857143	4	4.92307692307692	2.54807692307692	4.14285714285714	4.03571428571429	2.66666666666667	4.40625	8.83333333333333
14	5	4.86363636363636	4.23	4.45454545454545	4.45833333333333	9.91666666666667	7.84615384615385	4	4.76923076923077	2.54464285714286	4.07142857142857	4.03333333333333	2.73333333333333	4.33333333333333	8.8421052631579
15	5	5.04545454545455	4.3725	4.36363636363636	4.91666666666667	9.53846153846154	8.23076923076923	4	4.92307692307692	2.44230769230769	4.15384615384615	4	2.6875	4.03125	9.11111111111111
16	5	5.125	3.72	4.54545454545455	4.58333333333333	9.61538461538461	8.23076923076923	4	5	2.51785714285714	4.07142857142857	4.03571428571429	2.6	3.93333333333333	8.83333333333333
17	5	5.31818181818182	3.5475	4.59090909090909	4.75	9.53846153846154	8.38461538461539	4	5	2.53846153846154	4.21428571428571	4.03333333333333	2.6875	4.125	8.75
18	4.85714285714286	5.31818181818182	3.12	4.54166666666667	5.125	10	7.76923076923077	4	5	2.49107142857143	4.15384615384615	4	2.73333333333333	4.125	9.80555555555556
19	4.875	5.125	2.8875	4.86363636363636	4.70833333333333	9.30769230769231	8.15384615384615	4	4.85714285714286	2.60714285714286	4.28571428571429	4.1	2.8	4.13333333333333	9.05555555555556
20	4.92857142857143	5.09090909090909	3.08	4.70833333333333	4.375	9.61538461538461	7.84615384615385	4	4.84615384615385	2.57142857142857	4	4.03571428571429	2.75	4.25	8.91666666666667
21	4.9375	5	2.97	4.54166666666667	4.79166666666667	9.75	7.76923076923077	3.96153846153846	4.92307692307692	2.38461538461538	4	4.03333333333333	2.8	3.90625	9.52777777777778
22	5	5.22727272727273	3.52	4.27272727272727	5	9.61538461538461	7.65384615384615	4	5	2.50892857142857	4.07142857142857	4	2.93333333333333	3.86666666666667	9
23	5	5.41666666666667	3.63	4.70833333333333	4.79166666666667	9.76923076923077	7.96153846153846	4	4.92307692307692	2.65178571428571	4.28571428571429	4.03333333333333	2.86666666666667	4	9.02777777777778
24	4.64285714285714	5.31818181818182	3.08	4.125	4.90909090909091	10.25	7.73076923076923	4	5	2.57692307692308	4.15384615384615	4.07142857142857	2.8	3.9	9.41666666666667
25	4.8125	5.04166666666667	3.6575	4.5	4.79166666666667	9.76923076923077	7.84615384615385	3.92857142857143	5	2.48214285714286	4.07142857142857	3.96666666666667	2.73333333333333	3.6875	9.33333333333333
26	4.5	5.18181818181818	4.08	4.33333333333333	4.66666666666667	9.15384615384615	7.73076923076923	3.96153846153846	4.85714285714286	2.5625	4.07142857142857	4	2.75	3.6	9.02777777777778
27	4.42857142857143	5	3.575	4.20833333333333	4.875	9.83333333333333	7.88461538461539	3.92307692307692	5	2.625	4.15384615384615	4	2.66666666666667	3.78125	8.66666666666667
28	4.3125	5	4.2625	4.5	4.91666666666667	10	7.76923076923077	3.92307692307692	4.84615384615385	2.54464285714286	4.07142857142857	4.03333333333333	2.73333333333333	3.66666666666667	8.80555555555556
29	4.71428571428571	4.95454545454545	3.93	4.41666666666667	5.68181818181818	9.91666666666667	7.58333333333333	3.92307692307692	4.84615384615385	2.55357142857143	4.15384615384615	3.96428571428571	2.8	3.875	8.72222222222222
30	4.6875	5.16666666666667	3.9875	4.5	5.58333333333333	10	7.39285714285714	4	4.76923076923077	2.71153846153846	4.21428571428571	3.96666666666667	2.8	3.7	9.05555555555556
31	4.3125	4.95454545454545	3.84	4.33333333333333	5.29166666666667	9.83333333333333	7.875	4	4.78571428571429	2.55357142857143	4.57142857142857	3.82142857142857	2.8	3.8125	8.69444444444444
32	4.64285714285714	5.08333333333333	3.3	4.58333333333333	5	10	7.61538461538461	3.92307692307692	4.76923076923077	2.66071428571429	4.61538461538461	3.83333333333333	2.86666666666667	3.8	8.76470588235294
33	4.5	5.04545454545455	3.52	4.25	5.40909090909091	9.84615384615385	7.65384615384615	4	4.71428571428571	2.59615384615385	4.64285714285714	3.78571428571429	2.86666666666667	3.53333333333333	9.16666666666667
34	4.875	5.08333333333333	4.23	4.29166666666667	5.79166666666667	9.83333333333333	7.53846153846154	3.92307692307692	4.71428571428571	2.57142857142857	4.85714285714286	4.13333333333333	3	3.84375	8.63888888888889
35	4.92857142857143	4.95454545454545	3.5475	4.04166666666667	5.75	10	7.80769230769231	4	4.42857142857143	2.44642857142857	4.69230769230769	3.76666666666667	3	3.73333333333333	8.58333333333333
36	4.5625	5.125	2.9975	4.41666666666667	5.40909090909091	9.69230769230769	7.73076923076923	4.03846153846154	4.64285714285714	2.70192307692308	4.71428571428571	3.75	3	3.75	8.66666666666667
37	4.625	4.90909090909091	3.2175	4.45454545454545	5.25	9.41666666666667	7.96153846153846	4	4.85714285714286	2.59821428571429	4.46153846153846	4.03333333333333	3	3.66666666666667	8.91666666666667
38	4.14285714285714	4.875	2.97	4.33333333333333	5.33333333333333	9.92307692307692	8.08333333333333	4	4.92857142857143	2.48076923076923	4.71428571428571	4.10714285714286	3	3.63333333333333	8.33333333333333
39	4.6875	5.40909090909091	3.5475	4.375	5.31818181818182	9.91666666666667	7.69230769230769	4	5	2.48214285714286	4.78571428571429	4.1	3	3.625	8.73529411764706
40	4.375	5.25	3.96	4.29166666666667	5	9.91666666666667	7.73076923076923	4.03846153846154	5	2.44642857142857	4.57142857142857	3.78571428571429	3	3.7	8.27777777777778
41	4.57142857142857	5.04545454545455	3.9	4.29166666666667	5.25	9.76923076923077	7.76923076923077	4	5	2.47115384615385	4.71428571428571	3.76666666666667	3	3.43333333333333	8.30555555555556
42	4.5625	5.5	4.56	4.5	5.59090909090909	9.66666666666667	7.76923076923077	4	5	2.66964285714286	4.78571428571429	3.89285714285714	3	3.7	8.05555555555556
43	4.5	5.04166666666667	4.07	4.375	5.16666666666667	9.92307692307692	7.83333333333333	4	5	2.52884615384615	4.71428571428571	4.2	2.93333333333333	3.63333333333333	7.88888888888889
44	4.75	5.09090909090909	3.9325	4.29166666666667	4.95833333333333	9.83333333333333	8	4	5	2.58928571428571	4.64285714285714	4	2.70588235294118	3.76666666666667	7.77777777777778
45	4.42857142857143	5.45833333333333	4.71	4.33333333333333	4.40909090909091	9.69230769230769	7.69230769230769	4	5	2.58035714285714	4.71428571428571	3.71428571428571	2.875	3.43333333333333	7.5
46	4.4375	4.90909090909091	4.125	4.41666666666667	5.04166666666667	9.33333333333333	7.73076923076923	4	5.26666666666667	2.50961538461538	4.78571428571429	3.8	3	3.73333333333333	7.44444444444444
47	4.25	5	4.235	4.41666666666667	4.75	9.76923076923077	7.73076923076923	4.03846153846154	5.78571428571429	2.66964285714286	4.57142857142857	4.35714285714286	3	3.6875	7.05555555555556
48	4.4375	5.13636363636364	4.14	4.5	5.04545454545455	9.76923076923077	7.53846153846154	4	5.21428571428571	2.72321428571429	4.78571428571429	4.16666666666667	3	3.66666666666667	7.19444444444444
