# Supplementary material for: Two central pattern generators from the crab, Cancer borealis, respond robustly and differentially to extreme extracellular pH
Source: eLife journal article supplement (doi:10.7554/elife.41877), 2018-12-28
Supplement: supp [file elife-41877-supp-v1.zip › elife_poa_e41877_Figure_3_source_data_7.csv]

bin	STG1	STG2	STG3	STG4	STG5	STG6	STG7	STG8	STG9	STG10	STG11	STG12	STG13	STG14	STG15
1	0.211970958589757	0.245824845353819	0.182627521547528	0.188639430701021	0.210011147782586	0.192354689273489	0.282408459425865	0.178217953839831	0.236859831219191	0.225555527495885	0.159758168373615	0.184127339263713	0.160299671099905	0.182595512112936	0.234573856062985
2	0.209083303689591	0.2326298699247	0.178661882307527	0.191576542151322	0.223404364612346	0.190672893073927	0.28882421565511	0.179010341355971	0.254382646580895	0.221567676273336	0.177110747242213	0.186359209355383	0.166894528772792	0.177672876326448	0.24022250767492
3	0.216099117592272	0.217166058243587	0.180760718610986	0.177340964085021	0.210006131196554	0.193531079609547	0.281693347178975	0.173989955507378	0.288541213068698	0.222307265262675	0.178580314340469	0.174517554248951	0.15673088617561	0.167318262205817	0.239056057224797
4	0.209259397560709	0.214921768036046	0.18678442161849	0.192506508707509	0.202148137560067	0.193664263137732	0.281748123300426	0.172152126706014	0.273602340956783	0.221171090974123	0.173088816294498	0.18531274281807	0.162799795387782	0.174824624576734	0.25150205797681
5	0.210939277876745	0.24623633205205	0.193599019734863	0.187925734391649	0.19720538789095	0.193191109546092	0.275169361439134	0.171875289601405	0.273725980675063	0.213442126782717	0.163782215051694	0.178524727226483	0.155090241440531	0.16836298162837	0.254045808795594
6	0.210265374047291	0.222361773870165	0.197664236070191	0.180691021403165	0.206322469612414	0.192607447518449	0.274587360583852	0.177851171174893	0.265696014098008	0.224304596710973	0.172748432445036	0.187086611950134	0.165941786771083	0.182977060322073	0.25236267220826
7	0.215026521633382	0.209704390116076	0.196144217733534	0.180971428173626	0.196788518133909	0.192548192977785	0.264285777055476	0.181892243904074	0.273832546508241	0.21446893690004	0.165825642694286	0.170065388660719	0.165629471902226	0.168835967767681	0.241138503270728
8	0.21212628824848	0.207289100404537	0.193966172820403	0.183295560021192	0.198277155434952	0.190437105784757	0.263369325005691	0.175870962204504	0.27974524887534	0.228136785634949	0.16818270248557	0.174132368354657	0.149823142310057	0.167582134624998	0.257310490726516
9	0.217252361332474	0.221188633830125	0.192490974121442	0.172584288617618	0.19076251774909	0.193306336293434	0.266626233090361	0.180344521944009	0.276610820752727	0.211443890105531	0.169595573823348	0.167473322712553	0.122251735732442	0.186423084050509	0.250000774762266
10	0.219203029726867	0.20776470932948	0.19677920436526	0.173916795419643	0.18888340868769	0.188518880585624	0.265609138076618	0.170402573529898	0.27534636094213	0.229533335032834	0.160670496322183	0.165019503013987	0.129355773971501	0.172458096212462	0.250616280083907
11	0.217299881054813	0.23183735037169	0.189762533929268	0.167405830515568	0.184826356593637	0.190176906293006	0.258667495481721	0.170562387201241	0.282963382510358	0.212837224158958	0.169746552981306	0.172301398286175	0.158345045191411	0.185769679758429	0.250289514555767
12	0.223375386572139	0.223131585911203	0.185265017911294	0.170191980004274	0.18340386120859	0.187915086677876	0.248728379078012	0.169642490797782	0.273812954856611	0.217047670794167	0.159633265182255	0.168000575213982	0.151666787951543	0.202210628851275	0.256017435723558
13	0.217710980660465	0.211317363056932	0.188929169647325	0.15875265165199	0.185042909865556	0.187981567742512	0.249282372319408	0.16666827983064	0.284774716531371	0.220141359101169	0.151713854909249	0.158722203871249	0.154696322853038	0.224089845236981	0.24933156975852
14	0.229553279606453	0.205883435008121	0.192060895596348	0.156404321548843	0.185448570881608	0.189106081234816	0.249705365894965	0.168510302075157	0.272540514990998	0.219608995465256	0.147220501385096	0.161043399204889	0.151305277837132	0.228689864820846	0.253416555613706
15	0.226666392740171	0.205406715367038	0.19331806701303	0.155517883311102	0.179706062862087	0.189223567665229	0.254794039947573	0.165079245437147	0.283551534291184	0.219521453237074	0.157368199035275	0.157019417211839	0.149311581480244	0.198412986305059	0.263562735332532
16	0.232291828960184	0.216556101198726	0.185498303326835	0.15843329680603	0.177992924223241	0.188556184985617	0.256765738931731	0.164200336148265	0.284496824267991	0.224936073496373	0.147590068539123	0.160933625747418	0.148116935587474	0.191523235938965	0.266927294980968
17	0.238489176251642	0.241974123054647	0.183801776797618	0.181508218312967	0.182177465324556	0.18684649330428	0.260806445087132	0.165940104723697	0.286153915931438	0.211662374721439	0.155093469252756	0.160644413917186	0.159244276577772	0.205221654133981	0.265088025953438
18	0.226580275635331	0.244698562968372	0.164171537475401	0.175128832414028	0.183013955928174	0.191640238629416	0.253874640737911	0.165276094154575	0.287926536177375	0.222273572993778	0.151017766498826	0.155369022257159	0.154008392728656	0.200303414607592	0.257522666549461
19	0.225155488689967	0.226903941564112	0.148563969125471	0.177531110448613	0.187977801840402	0.190382988353991	0.244911696267485	0.165191925513288	0.282179860717586	0.21289139403454	0.163655857454995	0.168477313439294	0.172087737628079	0.204436953881869	0.272857250606411
20	0.237612081361949	0.215113742682114	0.150542011532052	0.18815693507412	0.18173566086126	0.189969089001317	0.246067183482291	0.165068869289533	0.28029781116883	0.221816182674938	0.139704029697716	0.159556624729396	0.160169243199282	0.203377893937201	0.267080340631083
21	0.239818003554706	0.204230684018363	0.148478224042493	0.184949005618044	0.182841398037879	0.192574382688192	0.243927675665917	0.165926936163388	0.283697975959025	0.209234361791987	0.147838470870856	0.160007313275553	0.15032490864702	0.185304208708561	0.275932816978163
22	0.236920724953206	0.217107057275491	0.153200398536398	0.161653080773218	0.181646333230156	0.191354155748553	0.245553127230921	0.164404992555811	0.284087831526742	0.226211772664563	0.149251459995079	0.154658209829007	0.173284675228206	0.18644368275452	0.279152829840401
23	0.238750153395025	0.244732758544807	0.154426898402958	0.164685693997244	0.182601651006595	0.19263829200348	0.245389604760786	0.16570416923034	0.283767277960961	0.221919684895486	0.163504762482362	0.157483618036924	0.165508963011601	0.202997013647962	0.275273743047757
24	0.225683598854845	0.241345341487983	0.154262766578052	0.150381941166821	0.185173889650812	0.202763217445808	0.244845086635944	0.165820613423173	0.292357506881957	0.223161507597912	0.150785346492034	0.163826145335398	0.156687727988493	0.184716257372103	0.273525307980613
25	0.248179508823633	0.207746052538962	0.157697708517224	0.167303737593964	0.182827235814671	0.189970856970061	0.255794661658944	0.163338771112898	0.295764176982697	0.214844049114907	0.14864711236434	0.160428019341073	0.148414677106901	0.184499648352276	0.280990184730857
26	0.223625668913493	0.224325137962843	0.158924218843606	0.168309188359983	0.182668998769744	0.186693269324233	0.242244016338851	0.169683986920906	0.28440982169555	0.223347297672881	0.146402147758103	0.152679028487845	0.150623821755144	0.176989364900955	0.275561775547423
27	0.207350887039747	0.200925555676131	0.160418332918769	0.155056249852714	0.184531408217949	0.191264491473648	0.24196625539792	0.171004180755486	0.283911339081011	0.222601390309699	0.154398691748718	0.152650774802907	0.147035115595136	0.192328619816855	0.277122221318779
28	0.200586028222797	0.201321759821244	0.165176477929001	0.168009526068531	0.186031288213336	0.191857375435188	0.246043346125364	0.167965796844957	0.282437439660888	0.229469705231857	0.14900057247616	0.157629796554047	0.157953014444426	0.186875735475279	0.279014484992778
29	0.230263066661103	0.197297177315518	0.164590786459839	0.168338366726941	0.184721893566842	0.19375889476093	0.24600676815241	0.168195500241337	0.282934418219653	0.223754139866394	0.151507382947009	0.152348480670334	0.155804456741684	0.194030140337685	0.280973087097042
30	0.230733083568019	0.218488277020359	0.167653518962849	0.165528626041227	0.188998536124295	0.19518397616367	0.246183382620354	0.1686950632666	0.282917060868504	0.226414962629999	0.157540315062067	0.150984064589399	0.160912180083103	0.184807339560046	0.269631989521641
31	0.194413741367187	0.20912702889008	0.16858520498054	0.155912895199712	0.187874460678001	0.194131891389658	0.246312912959827	0.16884671053579	0.283351429531424	0.227508313315517	0.179426638358732	0.151757878067588	0.151069603448373	0.19459670282985	0.278466979646877
32	0.216825012099672	0.207411161922349	0.16798772539772	0.160308692535402	0.189158376062385	0.192183878744287	0.24714676482072	0.167468282459515	0.285992420561092	0.221238163673602	0.19199310081238	0.155934581863643	0.155869056677324	0.187492466745923	0.277262212616721
33	0.204424562679937	0.209520549811643	0.169125304404139	0.164671772659936	0.18818411142301	0.195320922285973	0.242521117960371	0.167015832339325	0.281692826483957	0.226168963947846	0.18016520976983	0.148536042735246	0.158685933934574	0.174061347704554	0.279427691028042
34	0.231599166316028	0.215652393886969	0.174038923088278	0.160488729133182	0.189176531259061	0.194211114031535	0.24582374134329	0.164921106027776	0.285524334277923	0.228458051049163	0.194740756519903	0.180218540405189	0.161572871306227	0.186624444528821	0.280354127802791
35	0.247537546607801	0.208068430151934	0.17420199250938	0.154532442439222	0.186483963614349	0.194697981471302	0.248676767928845	0.167631319354029	0.266940470154453	0.224329117869707	0.185464583479741	0.148455480098942	0.167910301492761	0.172606208731774	0.273412561946762
36	0.223283341325073	0.223914731189332	0.179513854112487	0.159203123733679	0.187878686510067	0.194105902322865	0.248237005864944	0.177659362151574	0.293756516224714	0.226605492081332	0.190352874359958	0.144707011103784	0.172543887312526	0.181944139935465	0.274999647494889
37	0.217037596813538	0.22355693073995	0.182862426513462	0.159284569994972	0.186288096353882	0.189025646551749	0.251686641788697	0.170254144943742	0.294413044991799	0.227100121389807	0.17119759475991	0.154278924203759	0.161156513262466	0.192077962159972	0.281778769972957
38	0.202090266534334	0.197286394192537	0.167538548541817	0.154412829424937	0.189857153702132	0.191066718332002	0.247952836761011	0.168268726927175	0.311648249604526	0.230612839644696	0.19124716530221	0.162918037693922	0.149134161017872	0.181020160560727	0.27249453327744
39	0.223643734641544	0.240284188610946	0.181589673816676	0.161537172672227	0.191510369473665	0.192278110111653	0.253877150529564	0.169889063088726	0.302968298431862	0.221986268314492	0.196275116236174	0.155954760980923	0.155881989096279	0.183931145517006	0.275843812761497
40	0.199215550089964	0.232030791062231	0.183739022158006	0.156108125154323	0.191925778605591	0.190391919082573	0.247832409702646	0.17556203030973	0.29625761842074	0.218892261365488	0.17902897924384	0.149072811125427	0.160290603792102	0.183816229135843	0.272250969047543
41	0.221227884962335	0.222936571538279	0.161161782313199	0.163296585619961	0.191157988607277	0.18954091404769	0.256362885281297	0.168534493318109	0.290534956762759	0.227259904990855	0.191638833951249	0.146382745204622	0.156769893370166	0.177192919412968	0.274555558423526
42	0.220077651483138	0.240072094903227	0.17391906801848	0.168922725930277	0.191982685262925	0.189756599810224	0.253288721062726	0.167930926293714	0.297784561961148	0.227051421346063	0.200703445088818	0.147680629701035	0.154643885990917	0.195730479658824	0.280055987904457
43	0.217838423357138	0.220602278733482	0.176383950989355	0.161804948770254	0.196402379880504	0.193968374955299	0.25418546103068	0.167657438730064	0.295367179590954	0.228249770543517	0.191641977757825	0.161539386293388	0.141815787229354	0.184844355341169	0.253139170191797
44	0.224366045504416	0.214864885308569	0.181653162451327	0.160662405799427	0.192312262138576	0.195591978522557	0.261529367582456	0.166828185325712	0.292746312310087	0.233250099260616	0.188755585355638	0.151968156564407	0.152742406664668	0.20483552799198	0.251440967394559
45	0.201854389536884	0.232475295816871	0.171775389351394	0.168172130147963	0.190813341192507	0.19216302782069	0.25617432036592	0.167784826176592	0.287486235594719	0.224702000400785	0.186540441677307	0.141938856338686	0.158949475664966	0.170203270734951	0.247259933849462
46	0.218361194605634	0.211830413914671	0.180764316745567	0.166492890411229	0.191542855214294	0.189120111939031	0.249410729704838	0.169792787326333	0.293509022698788	0.230096020308523	0.19465886260408	0.149180578466673	0.166300612665579	0.187306521817188	0.257412442133627
47	0.192801057048619	0.214062318387372	0.176648523035559	0.163445350307363	0.19803631500303	0.190230184363102	0.248885399194692	0.176191827800388	0.327209443987561	0.226230249335664	0.178792696112939	0.149956393115467	0.146991681658492	0.182143638101149	0.260725957262844
48	0.214401679815092	0.214875327331622	0.175611756886675	0.164836272888063	0.193779091141924	0.188124994366419	0.248834576756331	0.169737939063952	0.321585122765541	0.233482080693832	0.190091757064814	0.151834497873688	0.160661277652411	0.185277485324563	0.253627457461742
