# Supplementary material for: Two central pattern generators from the crab, Cancer borealis, respond robustly and differentially to extreme extracellular pH
Source: eLife journal article supplement (doi:10.7554/elife.41877), 2018-12-28
Supplement: supp [file elife-41877-supp-v1.zip › elife_poa_e41877_Figure_4_source_data_1.csv]

prep	bin	pH78_1	pH55	pH61	pH67	pH72	pH78_2	pH78_3	pH83	pH88	pH93	pH98	pH104	pH78_4
1	1	-46.6355790508032	-27.556679868448	-27.7583762765903	-44.3359047425862	-47.848394927908	-50.4830301226444	-46.6355790508032	-43.8212057715991	-35.9927026577175	-31.0451002596656	-51.6014689391035	-51.5330491533338	-32.1115115157905
1	2	-46.8734936632093	-27.5782108869399	-27.6579569109666	-44.1266042195088	-47.8171401056193	-50.6959767414006	-46.8734936632093	-44.0118118137748	-36.1536621867657	-31.0932527166141	-51.6907593602248	-51.5758219554829	-32.2420895516441
1	3	-47.1183093861976	-27.809743819774	-27.6088414217058	-44.6414907757244	-48.000660284638	-50.6825281113806	-47.1183093861976	-43.601142923002	-35.8754345701581	-32.2635585467918	-51.2801101444509	-51.5559985314511	-32.2839055810731
1	4	-47.1263567654784	-27.6999273887141	-27.4312715747828	-44.312426609103	-47.9782414720201	-50.4625880014169	-47.1263567654784	-43.3592755474355	-35.6472160036092	-31.6261677899072	-51.3784671754179	-52.0038860429148	-32.4861332861405
1	5	-46.9625040734345	-28.0377093125987	-27.5698777301634	-43.7635412945024	-47.7363106780229	-50.6894644890779	-46.9625040734345	-43.8438985527625	-35.5451556707118	-31.28545397211	-51.5929324520025	-52.0518947870672	-32.7554391141804
1	6	-47.3373030939164	-27.9418870623151	-27.3839899916859	-44.2190414918956	-47.8917718182504	-50.4253549617811	-47.3373030939164	-43.5815674134282	-35.7951946327457	-30.4606383250268	-51.5957054062115	-52.1581279829108	-32.7458581005729
2	1	-45.7535693804179	-25.2276758941515	-23.5755802746426	-29.1502262496547	-41.0135219529656	-45.2597860360546	-38.6545859457707	-40.9605174875622	-43.9232809888361	-45.2997871459588	-45.4231228806285	-45.47381002708	-45.2597860360546
2	2	-45.4283209528396	-25.3429435504217	-23.6578967180311	-28.8486385788449	-40.8881557003064	-45.0307559402399	-38.4918384092929	-40.8557914558622	-43.8095179247859	-45.323970343498	-45.5329708157104	-45.6761387819741	-45.0307559402399
2	3	-45.7399592730565	-25.5297608493967	-23.6225550411906	-28.9564909218346	-40.3596504210127	-45.8670610454586	-38.6396169783189	-40.9794429387366	-43.9545995942224	-45.1418212684834	-45.4301822630235	-45.4798914831893	-45.8670610454586
2	4	-45.5189220833208	-25.4622740196597	-23.6438757685543	-29.0976270035032	-41.5293707551402	-44.9963492296184	-38.5779529496052	-41.0660180432276	-44.0691713765143	-45.5147412100477	-45.3759583220639	-45.67670342294	-44.9963492296184
2	5	-45.6428383818178	-25.5652351493154	-23.7253736018257	-29.0500699438344	-40.3803925537228	-45.4885618268667	-38.7665045666508	-40.7822052427738	-43.9382984398408	-45.4679176370127	-45.5396792512415	-45.6876909347983	-45.4885618268667
2	6	-45.4829344477078	-25.5624051111154	-23.8126971150731	-29.0443784794411	-40.6313868927108	-45.4650524351863	-39.0128685782883	-41.1029393351317	-44.2420180130995	-45.4224105302951	-45.4015167677925	-45.6177333413131	-45.4650524351863
3	1	-44.4734943883056	-25.4317219786891	-39.952542686861	-41.8252018896262	-42.6295350994563	-42.0033656623474	-44.4734943883056	-46.984331902632	-46.9215617952586	-43.8849608676593	-42.2324758960274	-42.5576249750378	-44.7728711366249
3	2	-44.4725571474033	-24.9988760933891	-40.0446179422546	-41.8967346603974	-42.7155414804849	-42.0415549958368	-44.4725571474033	-47.0099991740643	-46.9847663117143	-43.6934848484268	-41.8984764415461	-42.3921348407182	-44.7855307289697
3	3	-44.4282826630576	-24.7534088347045	-39.7891125008821	-41.8533404444514	-42.8336798013917	-42.0650860723702	-44.4282826630576	-47.0675812560841	-46.974446459753	-43.9209465663023	-42.2790343890396	-42.7078394194919	-44.8440678026376
3	4	-44.5822392740423	-24.927044791274	-39.9739197250126	-41.7547547325757	-42.5500657974824	-42.127036666025	-44.5822392740423	-46.9393453077613	-47.00755565941	-43.6131887516114	-41.9678906188746	-42.713336070404	-44.9002185689689
3	5	-44.2863861803174	-24.7174818576614	-39.7173073055125	-41.6380037567993	-42.5829888857124	-42.0933138938325	-44.2863861803174	-46.9781905679274	-47.036836953585	-44.5732502053365	-42.2524098651794	-42.5691013102469	-44.8210600597888
3	6	-44.9947358729414	-24.4013368146332	-39.797576021373	-41.3996442845995	-42.5689947084402	-42.144033391326	-44.9947358729414	-46.9272620654807	-47.173044983657	-44.4560873368296	-39.4774514492478	-43.009184022503	-44.6819223892241
4	1	-36.9264645982519	-23.70519314118	-27.4482205687164	-33.1535054420296	-38.8265577460571	-40.5560877507782	-24.1019640819536	-44.972471162048	-53.4968843805216	-41.4547163787603	-48.3593187745812	-47.1948819218613	-40.5560877507782
4	2	-36.9908324556455	-23.7389051131186	-27.5876877671249	-33.1787973280792	-39.1172962807738	-40.3938367274448	-24.5896608008183	-45.5421541397521	-53.3977649252823	-41.5201389429517	-48.4503620744901	-47.0288798926229	-40.3938367274448
4	3	-37.2367443197671	-23.7709283017934	-27.4062485034809	-33.064666317323	-39.2597415720288	-40.4382144896066	-23.6556317196289	-45.9987004000074	-53.4617174089718	-41.6129705105715	-48.5004057315561	-47.0354307794805	-40.4382144896066
4	4	-37.2384559822055	-23.8714737546183	-27.0030540080414	-33.134781066521	-38.8584036605017	-40.2166402429034	-24.33336183458	-46.8902737401309	-53.2106720092979	-41.6158558594461	-48.4156375832445	-47.0008949322493	-40.2166402429034
4	5	-37.261918662558	-23.9673024900595	-26.8912716839717	-32.9948287067316	-38.7734442663216	-40.0432211078356	-25.6186480376655	-47.2649512410074	-52.9718053381634	-41.6682139087675	-48.4081608781236	-47.0946946423203	-40.0432211078356
4	6	-37.1942264141515	-24.0393137143426	-26.7993417659029	-32.9808448667441	-39.0205551727201	-39.4558835853253	-25.3580106961572	-47.8974778432013	-52.8747765187967	-41.6548979997271	-48.3553163116383	-46.9776721971396	-39.4558835853253
5	1	-41.891885633252	-21.9802957960057	-36.0047150241259	-43.1937185176398	-43.5519467532991	-44.3570363630072	-41.891885633252	-45.8852099768378	-44.7026910008831	-44.6185563022672	-45.8691863587013	-44.8663629653228	-43.5479416317486
5	2	-41.8882536156099	-21.8703107386331	-36.0641639260165	-42.2329470923969	-43.3543663740516	-44.3778415260061	-41.8882536156099	-45.7266740172331	-44.4024568788708	-44.3671256022357	-45.9102548314486	-44.875734818044	-43.9007391775184
5	3	-42.1471880322877	-21.8486950386401	-36.0918602766769	-42.5800348394474	-43.0454004874871	-44.2605533675182	-42.1471880322877	-45.2793905511685	-44.7325261051114	-44.4679135390789	-45.7987735724303	-44.6739853165248	-43.7103313881796
5	4	-42.1237813209165	-21.8077315124083	-35.5117969675619	-41.9162067622147	-42.9268484546412	-44.1550363846184	-42.1237813209165	-45.3040665589496	-44.6084442560824	-44.4377945556345	-45.6775731478177	-44.340613013695	-43.806507433415
5	5	-42.3632006739978	-21.7150373271437	-35.2397621029092	-42.2356628739806	-43.2319315077685	-44.0723407541005	-42.3632006739978	-45.4344306740697	-44.5975429415911	-44.6640342324567	-45.433455323882	-44.3752208618951	-43.7536696587014
5	6	-42.6467514413925	-21.6640849173248	-35.1884244400397	-41.8120026429191	-42.9655834938017	-44.5834987872209	-42.6467514413925	-45.497547975906	-44.4589902033442	-44.4795110620599	-45.6281663907525	-44.5735931475252	-43.8180021094195
6	1	-51.4899132190856	-27.9135000547753	-44.2204273568311	-47.7237695193535	-49.4836312152407	-50.7117521103519	-51.8396546211802	-52.8383294928049	-51.0618900018049	-51.7932136338098	-52.7998722500676	-53.1355225212704	-50.7117521103519
6	2	-51.3512667222204	-27.4995543288171	-45.0775912584625	-47.0769632375804	-49.3698239432434	-50.8183920076052	-52.1431621259087	-52.8601393025935	-51.5221672267834	-51.7961725484186	-52.7745370274173	-53.4451355169018	-50.8183920076052
6	3	-50.9730008328732	-27.5200634937894	-44.1487642367438	-48.1663802608778	-49.3276102559362	-50.6150453392149	-52.1850892723119	-53.231469682544	-51.409431152522	-51.9515510179737	-52.7919052890054	-53.5993398297716	-50.6150453392149
6	4	-51.0740863543137	-27.4083567845719	-44.5336244021244	-48.3514506750298	-49.2697341897597	-50.6616626274449	-51.8620590136297	-53.1077183728738	-51.0142364878097	-51.9444068942623	-52.8183431262546	-53.4731583833552	-50.6616626274449
6	5	-51.0395560698506	-27.3589232327601	-45.0902301167437	-48.2370670937839	-49.4273489081886	-50.7592725641835	-52.211989088951	-53.2425111422354	-51.0775930417761	-51.8544544163063	-52.6596211745034	-53.3653105358496	-50.7592725641835
6	6	-51.0983695615916	-27.3281294687675	-44.9675555975726	-48.2081592745799	-49.4052001860754	-50.5244721661894	-51.8148841012008	-52.8255137138988	-51.4503579683853	-51.8744669208484	-52.6697329396784	-53.2389093241596	-50.5244721661894
7	1	-43.6589354401982	-24.0808509381976	-35.9342875924458	-41.7217065599162	-37.1271750676437	-38.2109939554982	-43.6589354401982	-43.1672793786685	-46.3623007844041	-44.7919761316787	-47.8083106087385	-48.1818146942873	-45.0849504724149
7	2	-43.409233057931	-24.1092970161353	-35.7956086658866	-41.83582589264	-37.0701200239276	-38.0621182918459	-43.409233057931	-43.0038383507577	-46.3647169341427	-44.8869069516282	-47.8151384874705	-48.1582540375665	-44.9525441073555
7	3	-43.6427498227784	-24.1278426663393	-35.9061966879015	-41.8662919646646	-37.0317272884373	-37.8765747164826	-43.6427498227784	-42.9295469574262	-46.3706852734709	-44.8112466516972	-47.9071640005363	-48.1171774835407	-45.0307782403312
7	4	-43.686472653947	-24.226004778639	-35.8163328783633	-41.8588419497605	-37.2545951719949	-37.7993447031297	-43.686472653947	-42.9760277550491	-46.4760951190911	-44.7388115107014	-48.1964672289511	-48.041564136113	-45.2967061422524
7	5	-43.5743673061199	-24.3282980209515	-35.8865856239748	-41.8406449497385	-37.4193083299921	-37.9005659007282	-43.5743673061199	-42.1281372364882	-46.5642857638562	-44.6985184813102	-48.7470732519313	-47.8915196578354	-44.9425490294039
7	6	-43.4489194318027	-24.4223081075132	-35.7057226308112	-41.6898847888776	-37.3987517310311	-37.931627167974	-43.4489194318027	-41.9459523193104	-46.6263239980099	-44.7992601668182	-48.9441929148377	-47.9233418406513	-45.0090627990608
8	1	-52.7975412962477	-36.6336727820721	-34.9366635464132	-52.8147373076474	-55.6120935356802	-56.1486819678406	-56.6655377008442	-58.8944818233818	-56.7752861694869	-58.1554198883215	-55.7645639450712	-56.2619169861713	-56.1486819678406
8	2	-52.8671590630235	-36.75915089734	-34.8389600160427	-52.7947552892021	-55.5252932482144	-55.9307608700435	-56.7180007096823	-58.9447421157305	-56.8607737211212	-58.1353465240335	-55.6832338672023	-56.1027919861543	-55.9307608700435
8	3	-53.1673220174238	-36.8111558341539	-34.9753002603979	-52.8149942576205	-55.8632870654929	-55.7758224438105	-56.7467758013739	-58.8203444569876	-56.9008842913396	-57.8549603647907	-55.5235326081272	-56.105477124522	-55.7758224438105
8	4	-53.087468152166	-36.8138645299904	-34.9157517599439	-52.7295676852513	-55.947155987151	-55.9482284628993	-56.6844935597128	-58.6654326100979	-57.0532419134345	-58.2174783945787	-55.5952194332634	-56.3418103051694	-55.9482284628993
8	5	-53.0102493960484	-36.8001818303024	-34.8881419798023	-52.801610151948	-55.9161380592258	-56.0198944491986	-56.6949432272724	-58.8392713157654	-56.9386264693551	-58.1466652972768	-55.597501734613	-56.5329295996157	-56.0198944491986
8	6	-52.8962924307047	-36.742999629547	-34.8657167321689	-52.571243730948	-55.7649706543508	-55.9593049963524	-56.3668178443793	-58.90096980631	-56.7936715587685	-55.9161950044895	-55.7594113971969	-56.4961554086983	-55.9593049963524
9	1	-46.5187303994952	-32.211174954674	-31.8362654457271	-41.5445735307084	-47.663841205566	-48.7062849896314	-46.5187303994952	-49.6673360803551	-52.457434334389	-52.8540909272286	-52.5937075704123	-51.8319827100523	-48.3913945891879
9	2	-46.7366124336118	-32.4140983582205	-31.7779339714953	-41.3508608244405	-47.6675041739938	-48.1995475319287	-46.7366124336118	-50.1810562229414	-52.0993577141114	-53.1350999562978	-52.4893078581443	-51.6435439828242	-48.4323014526619
9	3	-46.8420513929929	-32.5762453640178	-31.6441751865571	-40.9562004580067	-47.5435042487611	-49.2938646354907	-46.8420513929929	-49.9134458536502	-52.3094358146063	-52.9623375248729	-52.258820764407	-51.8440903210199	-48.4539915850095
9	4	-46.9811962121865	-33.2340343592287	-31.7343059481087	-41.2570795056532	-47.4148543775381	-48.8148766881186	-46.9811962121865	-49.9064585248684	-52.1986249248027	-52.8570902010011	-52.2715804585879	-51.5830326711938	-48.4352198729685
9	5	-46.922575762053	-33.3345462662747	-31.6789224634184	-41.307517787403	-47.5559016186909	-49.094728079261	-46.922575762053	-49.7663096039955	-52.2971975202618	-52.6623965038983	-51.8466663769403	-51.8377717139575	-48.4752414648441
9	6	-46.6277399431925	-32.8941352764123	-31.629379050318	-41.1026831953205	-47.3811698880843	-48.7788872478558	-46.6277399431925	-49.8346771911991	-52.1691896727047	-52.8640348504337	-52.3547050922305	-51.8777692082448	-48.4790263368661
