# Supplementary material for: Two central pattern generators from the crab, Cancer borealis, respond robustly and differentially to extreme extracellular pH
Source: eLife journal article supplement (doi:10.7554/elife.41877), 2018-12-28
Supplement: supp [file elife-41877-supp-v1.zip › elife_poa_e41877_Figure_4_source_data_2.csv]

prep	bin	pH78_1	pH55	pH61	pH67	pH72	pH78_2	pH78_3	pH83	pH88	pH93	pH98	pH104	pH78_4
1	1	-44.740603137409	-35.9154495531248	-34.794633166262	-38.591218838078	-39.3279238362933	-45.5305671752912	-44.740603137409	-45.7921174119571	-49.2275737566593	-53.9177210061942	-56.590984693466	-56.7400460368649	-49.0866673275192
1	2	-45.1106895146887	-36.1485504204907	-34.8759018478222	-38.4679757472188	-39.2071603044329	-45.4844861997092	-45.1106895146887	-45.6372416369174	-49.5088478899862	-53.7681932613214	-57.670873528396	-57.07178625311	-48.9683514525206
1	3	-44.8900745500278	-36.5283600900665	-34.5969935997674	-38.3092645639352	-39.4065259110167	-45.4695648057607	-44.8900745500278	-45.6093980175711	-49.4786921731129	-53.5100494634491	-57.531031499478	-56.5542766179378	-49.3499593548399
1	4	-45.2457394079319	-36.692303451754	-33.8969723401931	-38.3494425453873	-38.8768880124921	-45.2579878726622	-45.2457394079319	-45.5732345828407	-48.8767694362023	-54.0045518130504	-56.4456076715727	-57.680409291329	-49.5336519671948
1	5	-45.4108815342712	-37.4848345136912	-33.7825517211236	-38.7611436408346	-39.0501446119721	-44.9920481874485	-45.4108815342712	-45.8511028555657	-49.107582439106	-54.0364936383112	-56.3523777186724	-56.8927529196325	-49.2866475294825
1	6	-45.3049328086003	-38.5033819817125	-33.5421756020378	-38.8953404496012	-39.2951525187118	-45.2861204213319	-45.3049328086003	-45.8419239977526	-49.5638143754901	-53.9021427528337	-55.9014120183655	-57.6528514559288	-48.9054161060417
2	1	-30.5927705926353	-34.0416658653049	-24.7472936478181	-29.7482721288585	-28.6263779206197	-29.4352413733291	-32.7099168109678	-34.4419291683338	-36.6965050235151	-44.2404789810045	-40.3110912174931	-43.3847442665674	-29.4352413733291
2	2	-30.3094469887805	-34.0446106720723	-25.0581347700728	-29.6656859644844	-28.7282071657027	-29.3769210375955	-32.1234177875381	-34.2087889575744	-36.3016040499933	-44.2140774856177	-40.9868939182531	-43.4004901169434	-29.3769210375955
2	3	-29.9647205503647	-34.0697089143254	-24.827976044584	-30.2507112688172	-28.3198761614112	-29.6596348537164	-32.8708156388787	-34.2113624434372	-36.9151957723072	-43.6044885374875	-40.4302685611175	-43.2218991064927	-29.6596348537164
2	4	-30.128996685417	-33.9993719344245	-25.0355014748437	-29.7967436518236	-28.7290192117508	-29.5174691569341	-31.9588126945137	-34.199148661923	-36.5148248510132	-43.6617234611766	-41.0189791790848	-43.3141495756406	-29.5174691569341
2	5	-30.3310359446837	-33.8789810508877	-25.1642381222323	-30.0856175802902	-28.1401453293828	-29.4024924812473	-32.6102256802324	-34.3621788217785	-36.7571516383122	-43.8751516036858	-40.8805028439357	-43.3260071097637	-29.4024924812473
2	6	-30.1619543610614	-34.038028963602	-25.2436686196408	-30.0564574873159	-28.7144033050076	-29.6911198172634	-32.7059127406401	-34.406787274229	-36.9649161392053	-43.9200747472763	-40.5671779849891	-43.4337965939099	-29.6911198172634
3	1	-35.9440189671386	-41.1568619416132	-34.4761766571307	-34.7292522326879	-34.9897517548526	-35.9488706284348	-35.9440189671386	-37.735348495998	-38.6554734124841	-48.8161547653734	-50.8130116308199	-48.8793733938503	-36.7368996466379
3	2	-36.0400528658517	-41.0193347027115	-34.6245406591683	-34.7692535098715	-34.7359489354542	-35.6350771009778	-36.0400528658517	-37.5341905794888	-38.5808462104355	-48.9883738195439	-50.6699332792537	-48.8273534049124	-36.8010899158002
3	3	-35.9850788237792	-40.9136484999878	-35.1040479865157	-34.7406172264382	-35.0022307675761	-35.7131641074663	-35.9850788237792	-37.9784955068942	-38.5324272445057	-49.0171751175148	-50.657694192119	-49.145162709844	-36.7662823505441
3	4	-35.9965359455254	-41.2627399681678	-35.6538154704865	-34.6528226175536	-34.5453943423297	-35.6022077031983	-35.9965359455254	-37.4646946300435	-38.7901979911672	-48.8318617011812	-50.6840015405137	-49.2688348705561	-36.8028100535673
3	5	-35.8760860986738	-41.1087932225776	-35.2639993134403	-34.4853330541006	-34.7841387685408	-35.6241975926449	-35.8760860986738	-37.8985344724428	-39.0361973312367	-49.0474871206528	-50.426397826126	-49.1535615207244	-36.9052719028695
3	6	-35.7243859240165	-40.7737346211373	-35.0378691084701	-34.551197928737	-34.5736289944077	-35.1246518325889	-35.7243859240165	-38.2713458111775	-39.0048472396458	-48.6928559554254	-50.3639056387854	-49.0018924144851	-37.0228624788895
4	1	-37.713252598516	-29.7668594817915	-32.5762799701774	-32.9022152552098	-28.3830418962174	-28.2806469308331	-29.4306493715696	-28.6176127952248	-29.6553944728254	-32.065305370677	-38.0617242919996	-40.0851999715966	-28.2806469308331
4	2	-37.2057923113895	-29.7484842196105	-32.5918825213807	-32.0124092932993	-28.3408765557646	-28.3414517605506	-29.1442366021848	-28.4354277710396	-29.207386635509	-32.0737429796647	-38.053764464568	-40.0369043946851	-28.3414517605506
4	3	-37.5480775200551	-29.7220507493871	-32.4213826017749	-31.530441902184	-28.3757376408879	-28.4802708796425	-29.8842131639588	-28.2682235435469	-29.3661056987125	-32.2623765817394	-38.189760585488	-40.0480138751976	-28.4802708796425
4	4	-37.5183106790302	-29.8311376806768	-31.7005556387621	-31.7669200362629	-28.4768803912848	-28.4302376997408	-28.825142433572	-28.3878254096138	-29.3522835217228	-32.3172063761501	-38.471741361542	-40.006484283716	-28.4302376997408
4	5	-37.5564437461175	-29.916371234881	-31.5061046979085	-31.5351395947395	-28.4780280536052	-28.5433881917452	-28.5197064951946	-28.3482625706461	-29.5063118987872	-32.411160866467	-38.4581390306821	-40.1226052906464	-28.5433881917452
4	6	-37.1539679114752	-30.0610028819922	-31.5215670503391	-31.9556456519807	-28.4382084533828	-28.5708601702589	-28.3025776958518	-27.6327656137824	-29.7773186432473	-32.2666069104855	-38.5512361052972	-40.1829886542321	-28.5708601702589
5	1	-31.593493983303	-29.8675992516874	-32.5608608053098	-34.3264198305446	-36.41216748455	-37.3332811908806	-31.593493983303	-33.3391692511154	-32.1768234959355	-34.3402018892684	-36.979643094055	-39.8269702953577	-32.8843039224828
5	2	-31.4527673281418	-29.9740765167249	-32.6424064276987	-34.4269269916217	-35.2956417451358	-37.4983380154645	-31.4527673281418	-32.8382652089995	-32.052787067425	-34.442828019363	-36.571238762103	-40.7800299858846	-32.3591837779069
5	3	-31.9862835616838	-29.7909957273564	-33.4570060699727	-34.6254560663533	-35.8388909399264	-37.1767290123494	-31.9862835616838	-32.7910103024667	-32.1700490727868	-34.0768281212376	-37.023695986861	-40.4145117602762	-31.4384559785612
5	4	-31.9907058266353	-29.8081843059589	-34.9966428011544	-33.7572346430347	-35.6206091672619	-36.9929900697461	-31.9907058266353	-33.1568222222718	-31.8738306729138	-33.2465499136508	-35.6578745146419	-39.881756015928	-32.0621532472768
5	5	-31.6168515415292	-29.6560853811088	-35.3700434691862	-33.9341419377129	-36.8699303276893	-37.1021079413717	-31.6168515415292	-33.0275005436282	-32.1889381404438	-34.3769143242742	-35.4361605790387	-40.0174923746577	-32.2099799387386
5	6	-31.7795568298084	-29.324093189081	-35.1950042046969	-34.5136299475535	-35.9207260038242	-37.230265755685	-31.7795568298084	-33.0750561418523	-31.5621454453468	-35.0576385372563	-36.7591131017191	-40.6819890346707	-32.6955001960638
6	1	-35.5013710148058	-29.5481135560773	-34.3211080349299	-31.0577368840777	-31.5719334704615	-30.8527516247622	-29.3124727695629	-30.7033304103939	-32.5549118032315	-45.10803337081	-48.705704012423	-50.6902471508815	-30.8527516247622
6	2	-35.3865131166693	-30.2368418072654	-33.8779565285854	-31.6277026920814	-31.508743077938	-30.5117020288512	-29.162467539645	-30.222922357535	-32.7283974057228	-44.8555185784125	-48.6408448540337	-50.6315142286546	-30.5117020288512
6	3	-35.5239198001215	-30.1938547973191	-34.0325031009853	-31.7900626136748	-31.1738121090516	-30.7925597243406	-29.5276634624158	-30.124815612023	-33.0497681639052	-45.0082281431919	-48.8655364502754	-50.8001084421469	-30.7925597243406
6	4	-35.0129339504212	-29.7208928080836	-34.4410953933177	-32.8596717309447	-31.6961965396151	-31.2261125470661	-29.4122709127913	-29.9140935859668	-33.0097987237778	-44.8274550643899	-49.1838439170174	-51.0647452784506	-31.2261125470661
6	5	-35.3424214904223	-29.2329901578455	-33.6700594046203	-32.4454188691491	-31.906840812296	-31.2652276119059	-29.7975651118661	-29.648058853916	-32.6118308677424	-45.408535100748	-49.5066512474549	-50.4876928586472	-31.2652276119059
6	6	-35.1408065612302	-29.0056183182938	-33.1928002696488	-32.59105251261	-31.3129777014738	-31.3344534904181	-29.2288533487487	-30.0553853179573	-32.9177439923467	-45.5443170628749	-49.2733721699042	-50.1595735129784	-31.3344534904181
7	1	-37.5151951598286	-29.8633509699809	-33.7247613914426	-34.084871123465	-35.1235610277497	-36.590035857248	-37.5151951598286	-41.3919300665732	-41.5416981099948	-50.7700603495089	-47.6142840045275	-50.7519285048658	-33.4937588966718
7	2	-37.5407758062638	-30.4565193065666	-33.4033355411702	-34.3111270492303	-34.7778387922815	-36.8711304404675	-37.5407758062638	-41.132354600688	-41.2042416392852	-51.0834786027591	-49.5251690629641	-51.1227538166604	-33.6717395569762
7	3	-39.6651656711251	-30.0818150549976	-33.4153681286582	-34.6400865302562	-34.7708514050811	-36.9137603739793	-39.6651656711251	-41.0107412720886	-40.9761186519781	-51.0754283281923	-49.6132695330733	-50.7422205655071	-34.181237847051
7	4	-39.6185040989668	-30.2579389037011	-33.7795770117236	-34.3456452377496	-35.020393836039	-36.9162174678512	-39.6185040989668	-40.6543930104093	-40.8922484698428	-51.0615731156975	-48.0290178811475	-51.0213076330546	-33.8962762464991
7	5	-39.3394078789003	-30.0060642494387	-34.0051117485358	-34.5072246992874	-34.9338212066974	-36.9304796349822	-39.3394078789003	-38.4945245929585	-40.9287801007304	-51.161378315164	-49.9882807920728	-50.8650991696985	-33.8743860960193
7	6	-39.2019954017799	-29.8342357672092	-34.313766892889	-34.2899517595467	-34.7225913856963	-36.9047052212021	-39.2019954017799	-36.5004206675312	-40.5533410883039	-51.4104357904368	-49.5809857423427	-50.7633814904525	-33.9511064444597
8	1	-48.7956417141174	-46.0087545951853	-39.0774639420905	-39.5398668123601	-40.3667926757251	-40.8763115748297	-41.2140191666288	-41.8214803131953	-46.635586770487	-56.9137837578268	-58.7956845464071	-57.5816896468316	-40.8763115748297
8	2	-48.587088186394	-46.3622265364001	-38.7916063618197	-39.5771045994958	-40.1571012514125	-40.8834960201404	-41.2260660775426	-42.1703044640081	-47.0351595713391	-56.8666178880468	-58.698807810465	-57.5412735988933	-40.8834960201404
8	3	-48.75719294828	-46.6992793703453	-38.7156349799339	-39.5901786348824	-40.3836767606452	-40.9836902247051	-41.7677254177038	-41.7904048735449	-47.7082276843271	-56.9751245930005	-58.7271934353534	-57.6016288439126	-40.9836902247051
8	4	-48.8272211243499	-46.9891931767466	-38.9014861492314	-39.6704987712956	-40.4869617337343	-40.9285234748129	-41.6747791975751	-41.6614434707458	-47.452878338731	-56.8812600882519	-58.5385837363468	-57.5385215140378	-40.9285234748129
8	5	-48.7210105497623	-46.9002454336409	-38.944650535817	-39.6662100783594	-40.4736695735393	-41.0160897603448	-41.0831433550021	-41.7092400325075	-47.2655242930652	-56.6015672720343	-58.4908536403473	-57.593076795378	-41.0160897603448
8	6	-48.783478927034	-46.6375828702299	-38.5778783131658	-39.7660870183738	-40.5243289951209	-41.1223716577342	-41.2460481987035	-42.0127463570676	-47.0035724708002	-56.5182390112182	-58.7248703061733	-57.6888851118494	-41.1223716577342
9	1	-33.8309935988014	-36.0538706482818	-31.8807631918221	-35.20432617214	-36.8232382434322	-40.2316251611604	-33.8309935988014	-33.6548735496967	-34.6088523063769	-37.9631582243845	-40.704033387671	-43.9423167771567	-33.7711040828278
9	2	-33.5400331041145	-36.1833395326053	-31.6592990633205	-35.3778553171493	-36.694567579894	-39.8776197360925	-33.5400331041145	-33.6277890605297	-34.4671087748494	-38.3884385083026	-40.7312109014368	-43.4928848191989	-33.9237421161692
9	3	-33.9840869971426	-36.2599174252774	-31.8286103648789	-35.2546957201278	-36.8275812807856	-40.1329017994239	-33.9840869971426	-33.834956034327	-34.9051271306984	-38.8446057081372	-40.966000279505	-43.7387852005207	-33.8042370438913
9	4	-33.6868240058891	-36.4035522103486	-31.7529594572606	-35.0011855880192	-36.6844939547242	-39.9818040624253	-33.6868240058891	-33.747530133955	-34.4685060434292	-38.3925476190144	-39.9176436189148	-43.6360469256117	-33.6085087626563
9	5	-33.7241938602665	-36.7618159971215	-31.7549536997291	-34.9207855955754	-37.0688782624946	-39.5536220847726	-33.7241938602665	-33.7442783844024	-34.7245445735692	-38.2465170514197	-39.9199382762633	-43.7846641665982	-33.8015428214379
9	6	-33.5062484353458	-36.9338963541996	-31.8078894823693	-34.7817470799816	-36.6618520806224	-39.9473896079835	-33.5062484353458	-33.7325746153834	-34.7591333238582	-38.4828225131177	-40.0217373222224	-43.7858242444445	-34.1418161301157
