# Supplementary material for: Two central pattern generators from the crab, Cancer borealis, respond robustly and differentially to extreme extracellular pH
Source: eLife journal article supplement (doi:10.7554/elife.41877), 2018-12-28
Supplement: supp [file elife-41877-supp-v1.zip › elife_poa_e41877_Figure_4_source_data_3.csv]

prep	bin	pH78_1	pH55	pH61	pH67	pH72	pH78_2	pH78_3	pH83	pH88	pH93	pH98	pH104	pH78_4
1	1	15.6862314348265	0	7.97424053829354	14.1874295829887	14.5697056870808	14.4439407466494	15.6862314348265	12.2729260927205	10.251581576795	8.56601340209456	15.4459260096022	15.2135285694288	10.7240714830838
1	2	15.7235377276082	0	7.68520951365151	14.1803998890528	14.5806216141994	14.443480645239	15.7235377276082	12.2489731463025	10.3915948877744	8.55841999125208	15.8098161907153	15.2611740201484	10.8912697389154
1	3	15.6924287128635	0	7.51350228236221	14.2905626510172	14.609078134859	14.4798404243441	15.6924287128635	12.1408086528739	10.3327284872078	8.79622946213497	15.7237175277396	15.2573773823225	10.8919379529827
1	4	15.7420284428174	0	7.21631399421373	14.2867415286465	14.564942382447	14.4442204053084	15.7420284428174	12.0386539977891	10.2884285531034	8.69035266984987	15.7377756688689	15.4484027254925	10.9912568972056
1	5	15.538470631357	0	7.08078828893341	14.2330033761699	14.5813711874193	14.3893806866521	15.538470631357	12.1284598416878	10.2712288148463	8.52504340313236	15.8232180913167	15.3871294832161	10.9963321630858
1	6	15.6963466424818	0	6.87616852730634	14.2959579963146	14.5660417125761	14.3488897460551	15.6963466424818	12.0520916023958	10.4303358755211	8.34182002802353	15.8497280158379	15.4158602804052	11.3004838368231
2	1	15.5045763011879	2.52119696027897	4.01684742534263	10.0237525323415	13.151996080794	13.7006766921494	12.8022506403693	13.0276999098558	12.2264738703295	13.2441771570884	12.6532328478132	14.082496022188	13.7006766921494
2	2	15.3825606654628	2.49132143736723	4.02056224639547	9.85681858511269	13.1563569512054	13.9200249706071	12.7708430616632	12.8454321270764	12.2032086997393	13.4080999734507	12.6902139379694	14.1003610527136	13.9200249706071
2	3	15.5408457862421	2.56842767645627	3.95188550483079	9.83905408332858	13.2604089229214	13.9384575019022	12.8442724151333	12.9037836977888	12.1303796654775	13.4466105940674	12.6729702915185	14.1351282770047	13.9384575019022
2	4	15.3805453739458	2.53348741224465	3.86668773650239	9.83969730457163	13.148248005431	13.4867874771653	12.7421535495848	12.9228741049175	12.1170025947994	13.4146272657476	12.6467692498386	14.0932326595712	13.4867874771653
2	5	15.3244923648233	2.52961375030862	3.85870760932192	9.77079492617668	13.2389301421344	13.5823622766817	12.8468637596517	12.9085675316251	12.1850700845757	13.359020560206	12.6405238779018	14.0751661124068	13.5823622766817
2	6	15.2629033367315	2.52997480797953	3.82197088670545	9.74678366682436	13.2100912309151	13.7000754529984	12.8273441480341	12.9191690543838	12.1286169842806	13.4067658243094	12.7549710736885	14.0452030161288	13.7000754529984
3	1	11.7244115074701	0	9.24038520975771	9.83949297599762	9.44762257427392	8.86644132238564	11.7244115074701	10.4308788477892	10.7906245434495	12.9923504894286	11.5732681026924	10.7192743425024	11.1099985388542
3	2	11.7096104861491	0	9.21403521070937	9.75698926992581	9.31372988643035	8.88047481655131	11.7096104861491	10.4283223241784	10.8468895719053	13.0468892473483	11.5368757751402	10.7072670092525	11.1390696414131
3	3	11.7612395215942	0	9.14974483546367	9.77994475288545	9.38942520394888	8.96784061743081	11.7612395215942	10.3600543209831	10.8340062233145	13.1413766174928	11.4918236429032	10.7308090598067	11.1104031249006
3	4	11.7054729358848	0	9.2117251451006	9.66393900947515	9.40607141935025	8.92878791666369	11.7054729358848	10.4896241994566	10.9153555414715	13.0834058365138	11.5093286432265	10.6870909447844	11.1265956764214
3	5	11.7367980695057	0	9.14490646544592	9.6721424185632	9.29427701026834	8.97255992897635	11.7367980695057	10.3847391165441	10.6623681896869	12.6562005707714	11.4422323062851	10.6995523123375	11.0988210963067
3	6	11.7888867085938	0	9.17941343164524	9.84840139936603	9.51840728990918	8.96637625662689	11.7888867085938	10.3856377096778	10.6499944394702	12.6261218559111	11.2165491845549	10.715188226176	11.058798186264
4	1	11.8039828907819	0	6.3172460187942	12.3845696413711	13.2564520544478	13.0980884198808	7.94040963134026	11.9764657496683	12.1849779839507	9.8009761789095	12.5960175195546	13.7622727555794	13.0980884198808
4	2	11.8728228949567	0	6.27831754311914	12.4933519771374	13.1556671411195	13.0647453227911	8.15508405251252	12.0800723267321	12.1276121514716	9.83859336152642	12.559255354833	13.7997034501575	13.0647453227911
4	3	11.9703476097789	0	6.11647383425492	12.4546529012088	13.2432252878596	13.0652114287226	7.93082310811004	12.1555954281054	12.122930730648	9.94248251006926	12.5369422589599	13.7420653252379	13.0652114287226
4	4	12.1280898475727	0	5.88962358572092	12.3990735045267	13.2287408629757	13.097104897582	7.87876010890417	12.2943121087083	12.2290487241849	9.86510316943519	12.7870621352106	13.8060553330111	13.097104897582
4	5	12.2095483622693	0	5.76283755025326	12.456544183007	13.3958017447485	13.0857004907831	8.00080505112444	12.3203462561515	12.1235202953164	9.89727942973279	12.6736318555666	13.7554925147155	13.0857004907831
4	6	12.1497571863744	0	5.63804993614271	12.2864619578487	13.3157514431886	12.9652339677318	7.90269303575184	12.2821798849552	11.9910299612124	9.92273046650274	12.6754665694476	13.7461054504254	12.9652339677318
5	1	14.2152711401435	0	13.7741020778588	13.7870329117499	14.1049060465939	13.8595424149182	14.2152711401435	14.0105268147583	13.1039390550968	12.3370181756377	11.9834828030336	14.2137651950142	15.0269242253209
5	2	14.2570076450865	0	13.9036515096623	13.4782864765565	13.8543092943007	14.0063804635718	14.2570076450865	14.1238521242605	13.0262195216665	12.2543905122807	12.0620258606143	14.3275243462079	14.7322517833047
5	3	14.271061925448	0	14.1381577918165	13.4684612385599	13.9380071348707	13.8250692563431	14.271061925448	14.0076981441476	13.1552714442187	12.3197822669283	12.3026978469644	14.340329635767	14.7670438756733
5	4	14.3871536489957	0	13.5995617252437	13.2930821370233	13.7352772897205	13.8134865027692	14.3871536489957	13.9583282721328	13.0874197529577	12.1333060483599	12.4788692797322	14.2425491979384	15.1788031750489
5	5	14.4295732193677	0	13.3814677177543	13.4484669397603	13.9817532235514	13.8545441255219	14.4295732193677	13.9404412102925	13.1031559082066	12.2623893255491	12.37747218104	14.0923122233571	15.2634979014592
5	6	14.3748013402896	0	13.365663921136	13.3279318078382	14.0291572704245	14.0611186161896	14.3748013402896	14.0396083713286	12.8549880259511	12.4269687248054	12.6139221942543	13.9818097068642	15.0161905071267
6	1	19.7981874220874	0	18.8264166815457	19.1778614802999	20.3916056586761	21.4743950968963	17.2995356407643	18.7131635674767	19.0641033336143	19.5963922481003	19.4402955890188	19.5612384363791	21.4743950968963
6	2	19.9510866139033	0	18.9360146322103	19.1948661964087	20.4703252385743	21.4641035144196	17.3059624152289	18.669545655968	19.1110691791908	19.5635920869326	19.4417164097991	19.6926476981089	21.4641035144196
6	3	20.0414856428605	0	18.8311991370473	19.3595119210632	20.4861039107982	21.4352196145193	17.2305082236029	18.5434534097275	19.0823512691628	19.5833723506785	19.3728684431762	19.6636327740031	21.4352196145193
6	4	20.1212505859125	0	18.7528419179545	19.4267226641055	20.5528528271896	21.4596562163421	17.2680156751909	18.6037471034458	19.0221253181424	19.6216879214355	19.3593950333338	19.6920760774878	21.4596562163421
6	5	20.0486883431052	0	19.0443791429357	19.4415949220702	20.5497881175051	21.4465273317075	17.2996106274737	18.4179455402165	19.0753839123183	19.6049588106326	19.3450293345872	19.6317519825926	21.4465273317075
6	6	20.0246545839818	0	18.9945744828359	19.2817632130119	20.4883283693508	21.5290124274005	17.3157753266105	18.6879962625938	19.0729002296396	19.614894295095	19.3040295343881	19.6350784130197	21.5290124274005
7	1	10.8856229958172	1.84194407366828	7.18920044327856	7.42843145599236	6.55342003074034	6.77172945350341	10.8856229958172	10.8547223624654	11.5494226461824	11.1749468111988	12.3050340703194	12.972273450605	13.9402497414213
7	2	10.7833729102412	1.83896447458899	7.19012996623409	7.40199534183013	6.55603545306513	6.71706472991228	10.7833729102412	10.7948455945211	11.5628268019074	11.2193423531919	12.3966006082415	12.8534728918021	13.9606599408165
7	3	11.1295151247112	1.81138780764362	7.20575724955756	7.42407498205292	6.54845408871692	6.66051768630422	11.1295151247112	10.8008047917462	11.6669423040556	11.3040919054963	12.3519768936538	12.8631677840134	13.9266516706577
7	4	11.2054767694912	1.80177574307452	7.20553278559392	7.45668530769501	6.59125555940443	6.62482546341564	11.2054767694912	10.7573107168515	11.7875239635477	11.2127865848954	12.456010510304	12.8792544115614	14.002544507975
7	5	10.9640048753132	1.7826495526888	7.28601542444624	7.45927827361246	6.60183828459112	6.6373225012762	10.9640048753132	10.5209610034252	11.9096783086455	11.1842944905405	12.5802321476911	12.9180499633499	13.964017595228
7	6	10.9682732866542	1.79138039446365	7.2798912725847	7.51717718770188	6.61489188750968	6.62288744960836	10.9682732866542	10.3519982743448	11.8874167502152	11.2665488816186	12.7211341225	12.7831115158321	14.0506248718894
8	1	15.6981823197057	2.27443548844442	3.137795798334	12.0344197052271	13.2627859508154	14.9053438586934	11.7228386453958	11.8846931253336	12.3874105673409	13.4513159340734	12.4097109486164	11.6029730619031	14.9053438586934
8	2	15.8475332181541	2.27864220808987	3.10484237467985	11.9506005092541	13.3866360901782	14.8449957277466	11.7256515967279	11.8343993595539	12.2660098889589	13.4695768252081	12.3827273799555	11.5656501041017	14.8449957277466
8	3	15.804908501556	2.32381184070947	3.10495705318034	11.9737449772325	13.3125766444484	14.4659075205726	11.4519668491368	11.7930115023913	12.1945610170907	13.4057147296492	12.3600485468222	11.5568672102486	14.4659075205726
8	4	15.592140228351	2.28005278329958	3.05162644575839	11.9846339092853	13.1713171084896	14.6805116230639	11.5595359025005	11.8460232376986	12.3824407455268	13.4992273214319	12.3460706042745	11.5469235146129	14.6805116230639
8	5	15.8616644391092	2.30456204336649	3.04694596353812	11.9003817152156	13.1882025995307	14.6743211837017	11.8048229984203	11.8653958947131	12.2728275223252	13.5010647443647	12.3186064003296	11.6114066984576	14.6743211837017
8	6	15.9135329730691	2.28011754829169	3.01192863935668	11.9347231876438	13.2962735924984	14.7767023977465	12.1243617965228	11.9173710359647	12.4514222588128	13.5317348367283	12.3148919323058	11.5907657396726	14.7767023977465
9	1	22.6860456134992	1.8753456610762	7.03867935734984	18.5148743697057	21.7652535719226	21.6320094147459	22.6860456134992	22.5419322032462	23.1455741836993	23.0943965045183	23.1551939661601	23.469330122826	25.0872733716917
9	2	22.5110036097211	0	6.84797866248514	18.3339406792408	21.5272976480954	21.5260653008516	22.5110036097211	22.8035653901002	22.9834307411324	23.280485859838	23.1166140924696	23.266527412313	25.0163185934616
9	3	22.4084221225526	0	6.59803005271297	18.0399594667195	21.5058464821587	21.6079743707462	22.4084221225526	22.7191559255453	23.1817725871068	23.3640598119053	23.2492960254686	23.3856062184127	25.0942909044278
9	4	22.388376610692	1.83080762440874	6.44790728152104	18.2802508486877	21.4439555257007	21.584158483553	22.388376610692	22.8007942551473	23.0666275166597	23.4476250695657	22.7917793276741	23.1508213017401	25.0253552599173
9	5	22.5329828907661	0	6.25614496714952	18.287025904499	21.685545186508	21.5619923566616	22.5329828907661	22.5068931492469	23.1094936333948	23.2470235766799	22.9465087665919	23.2662560168359	24.9034692306717
9	6	22.4819239276742	0	6.03201886780622	18.2705259769908	21.5565344822371	21.6166852146015	22.4819239276742	22.71116925382	23.1427794839451	23.0807056485343	22.780543487529	23.2549072860833	24.9030417014265
