# Supplementary material for: Two central pattern generators from the crab, Cancer borealis, respond robustly and differentially to extreme extracellular pH
Source: eLife journal article supplement (doi:10.7554/elife.41877), 2018-12-28
Supplement: supp [file elife-41877-supp-v1.zip › elife_poa_e41877_Figure_4_source_data_4.csv]

prep	bin	pH78_1	pH55	pH61	pH67	pH72	pH78_2	pH78_3	pH83	pH88	pH93	pH98	pH104	pH78_4
1	1	6.84191629260802	0	0	6.45769632448989	6.40433047333828	6.71410343622432	6.84191629260802	6.9318381753521	7.13289765128809	8.4943188761866	8.54577669362329	8.50711020997748	6.97544973774899
1	2	6.89186174972015	0	0	6.38418294303007	6.39636442559423	6.75546910152946	6.89186174972015	6.90184754922048	7.12615997897784	8.26060232866946	0	8.51688651475918	6.94265338831437
1	3	6.91372493302897	0	0	6.37077769676816	6.43708994928024	6.72797468556404	6.91372493302897	6.86926687700213	7.11604140788653	8.35116397909598	0	8.43766449731353	6.92076088371485
1	4	6.9556141681079	0	0	6.38379017423894	6.38533076259573	6.72618723915499	6.9556141681079	6.84595206783859	7.13323660380355	8.19412038284881	0	8.66046089223401	6.95771459491452
1	5	6.93759808658483	0	0	6.37792230306443	6.36627689982456	6.75305049511417	6.93759808658483	6.83224887517551	7.11911457876862	8.4243162521138	8.81837559922383	8.29893643469369	7.00118806444415
1	6	6.94172918170381	0	0	6.40375848882436	6.39594013250296	6.75775002923655	6.94172918170381	6.81037227323722	7.14235398955714	8.34015886925963	8.66841546368047	9.09095746135495	6.93837862135588
2	1	6.76487985442	6.60033115971839	0	6.85553415784013	6.00242160726415	6.35885964372169	6.49262949760142	6.54985377182943	6.9393593428409	9.5658011983791	7.88612662347342	0	6.35885964372169
2	2	6.69159853595834	6.59311434269358	0	6.71952126594815	5.99485469850704	6.33925420385242	6.48208517930666	6.56152221786605	6.98596527746246	0	8.10212329020005	9.16903578406304	6.33925420385242
2	3	6.69758355873615	6.66224265175716	0	6.72952754658715	5.99184329423296	6.37017276840786	6.45304083083963	6.57528095860515	6.99873952103902	9.57096739856025	8.00694824359754	9.14542022571534	6.37017276840786
2	4	6.6887889096897	6.49403440455008	0	6.66885335285316	5.94637141193449	6.31469231045408	6.43691355941552	6.54619371358621	7.00847167545195	0	8.07777983844432	9.22775589849478	6.31469231045408
2	5	6.69769024379091	6.40821614549441	0	6.66741778195841	5.94609271144052	6.3167070298944	6.52756342538301	6.57854882326869	6.99179346967854	0	8.08643501471127	9.43415910654672	6.3167070298944
2	6	6.65394370972895	6.50784859083367	0	6.62503853885304	5.99588024091286	6.2887177876437	6.42772121127136	6.54952198571496	7.01573526507494	0	7.9616528974902	0	6.2887177876437
3	1	8.21789412855924	0	7.35289430262743	7.5621624980429	7.60204360789155	7.70127622785056	8.21789412855924	8.09396240633886	8.64398246374986	0	0	0	8.186506349534
3	2	8.21069874498563	0	7.36935234222141	7.53175738422861	7.57490159926654	7.72188904538842	8.21069874498563	8.13431592268183	8.63953620388403	0	0	0	8.22943111619075
3	3	8.20376839957215	0	7.37017746464489	7.54010857308734	7.5865310428676	7.70721766177081	8.20376839957215	8.12569717545081	8.6151114778689	0	0	0	8.18510979978847
3	4	8.2148995386478	0	7.38587941841048	7.564146296096	7.61805311529607	7.73098534127442	8.2148995386478	8.08905877696286	8.6354691848041	0	0	0	8.17520496549721
3	5	8.17189855066954	0	7.43310025824071	7.54784824569197	7.61998064467617	7.69898865682561	8.17189855066954	8.11128013244604	8.63540137173623	0	0	0	8.1927020376889
3	6	8.17580678057793	0	7.36891357916065	7.55601502505402	7.59606579136612	7.70311225870192	8.17580678057793	8.13425587462611	8.67436191726537	0	0	0	8.21437529387366
4	1	8.08928271342937	0	0	7.16126733334551	5.2555548983476	5.57885653607772	6.25558553360815	5.71309864752105	6.22565571007217	7.31946994040512	8.18497016086907	8.41471706517644	5.57885653607772
4	2	8.05294708669687	0	0	7.12597916391525	5.26843084756089	5.63122832469722	6.25108583030451	5.71543099939598	6.15328013207367	7.31247332561679	8.30231538990012	8.55314849496336	5.63122832469722
4	3	8.01869457898495	0	0	7.01633628550192	5.25751734314708	5.63954447962734	6.38186469186058	5.73928553002277	6.21360696981475	7.37506922151143	8.41700964875632	8.41887166755683	5.63954447962734
4	4	8.02477787654356	0	0	6.83287807766198	5.27095561613615	5.68147421691172	6.33897836536165	5.71854330764597	6.20933475355141	7.39105873710032	8.5293410168035	8.6222882218735	5.68147421691172
4	5	8.00603012456005	0	0	6.76443626182562	5.27184325501953	5.66392584136094	6.22266415310538	5.69764428198274	6.19012471031675	7.39686069645002	8.39393381344542	8.7089927403066	5.66392584136094
4	6	8.0756759833237	0	0	6.64333122050945	5.29830716062451	5.73614623324893	6.15653287296054	5.68676022334911	6.20337571225074	7.43335898580813	8.38728115109843	8.53029156381339	5.73614623324893
5	1	5.28514852788261	0	5.55768012468246	5.39501946215732	5.88719694610559	5.8558194103707	5.28514852788261	5.56798492821437	5.46088442789398	5.65550260598562	5.77788226676549	6.28145167002916	5.22081962276933
5	2	5.33285814137486	0	5.50809493363896	5.4716347532105	5.85290854578887	5.87348435771456	5.33285814137486	5.57781069857149	5.48577512533906	5.69754887723437	5.73274157295058	6.13242459192284	5.2631172089877
5	3	5.30351017581249	0	5.53082815842683	5.48985820157725	5.7740984442712	5.88584121154559	5.30351017581249	5.44441702497758	5.455520459566	5.76909282588512	5.78704748280243	6.29822438678994	5.16083960165321
5	4	5.30358680623367	0	5.6802000105961	5.51329013658303	5.79604832299999	5.84468011877755	5.30358680623367	5.48249452065279	5.50089214268878	5.7593176770332	5.94227516526235	6.25135588363271	5.05835745876437
5	5	5.34882095166605	0	5.78277422211074	5.42171854568079	5.78394793750082	5.85952935129728	5.34882095166605	5.51834062678715	5.44966817006003	5.66002106320339	5.90309780639459	6.28738646359321	5.08570325720563
5	6	5.31183296447077	0	5.7930825742407	5.45630677046746	5.85693253085515	5.83874411877275	5.31183296447077	5.48180993831017	5.53659785735456	5.6323617001995	5.89767752742954	6.10386818817245	5.17549045948575
6	1	7.38535981145329	0	7.05862610768908	6.56571850936107	6.85077743672695	7.02222488021293	5.94918471381191	6.23707306493097	6.75799755719732	0	0	0	7.02222488021293
6	2	7.41513937104872	0	7.04011417314705	6.58626167659033	6.84190279063361	6.99280310427219	5.89548693097685	6.1915821081811	6.72047019520829	0	0	0	6.99280310427219
6	3	7.43194384990353	0	7.02624706657627	6.66267437080873	6.87808881805433	6.99725470601522	5.96457869095735	6.04807613555999	6.73081660151298	0	0	0	6.99725470601522
6	4	7.40347950316294	0	7.09749794682916	6.81280268380287	6.87050188490708	7.03008965448158	5.91986693579926	6.08304402214147	6.78160672192117	0	0	0	7.03008965448158
6	5	7.41149078471423	0	7.01002122328386	6.81874351456435	6.89539912939083	7.08877048703428	5.9600112808664	6.00959733973985	6.75487763554274	0	0	0	7.08877048703428
6	6	7.39226294472769	0	6.9935056068845	6.83159749160355	6.90642647550012	7.09796705017198	5.91569898966503	6.17957116097104	6.75547517274101	0	0	0	7.09796705017198
7	1	6.92126562396014	1.97696883953591	5.69948512882081	6.00000593814047	5.75571679137217	6.05478906784228	6.92126562396014	6.80928008575691	6.33897068878091	0	6.82297431097793	0	6.83234120244801
7	2	6.94794146239687	1.99297570840753	5.67146100763746	5.9812669824654	5.7166849782409	6.05922683278374	6.94794146239687	6.71921289210363	6.40817139697181	0	7.03203144722487	0	6.82356834364025
7	3	7.0375832090293	2.03659489711055	5.70581496681464	5.97457263934628	5.68058056918032	6.10070870750785	7.0375832090293	6.79497347368896	6.44370174819519	0	6.92069001186607	0	6.89422678142942
7	4	7.09113674429749	2.06371213547472	5.70968879487313	5.97704392759386	5.70820541270893	5.93890700660096	7.09113674429749	6.731260346923	6.51693706823786	0	7.13958253878359	0	6.92262913943643
7	5	7.09251078319481	2.04698849069871	5.77019854906453	6.03435582227026	5.6810804452461	5.93963129765766	7.09251078319481	6.95282284470619	6.47593806413785	0	0	0	6.94140131031565
7	6	7.03261307508075	2.00183592395731	5.84487673807455	5.94951282918978	5.69981410424002	6.05917157595854	7.03261307508075	6.88453508668411	6.48901238868229	0	0	0	7.00975244588495
8	1	8.3697554973293	7.40352238414648	0	5.86113648034552	6.75854270632066	7.36759577593062	7.93828055477152	7.98006081568942	8.88830895021527	0	0	0	7.36759577593062
8	2	8.39498502450037	7.44073058607403	0	5.85879508791316	6.70502799638419	7.32825201733549	7.96914928720537	8.01254857736596	8.87518907755784	0	0	0	7.32825201733549
8	3	8.41038743958264	7.54468095582112	0	5.84960176339793	6.69693286261884	7.35409304021592	7.97580466960664	7.99826056489882	8.85652067002937	0	0	0	7.35409304021592
8	4	8.40791680180383	7.65066670174521	0	5.83522876136712	6.71590964456459	7.34116563710292	8.01103684906488	7.97086408667917	8.89090775342064	0	0	0	7.34116563710292
8	5	8.40057073744335	7.65776856658389	0	5.84478372225744	6.71267459658599	7.33925956431056	7.96928801791433	7.95642305524999	8.89289413523013	0	0	0	7.33925956431056
8	6	8.39612216723022	7.58207240706132	0	5.85584612236974	6.70398273078439	7.35310300831664	7.95900282586768	8.00390908985472	8.84142801038962	0	0	0	7.35310300831664
9	1	7.87365510800316	0	0	0	4.45950828090198	6.95946987570171	7.87365510800316	7.97691687125645	8.06677408111422	8.53533478449807	9.1172934535788	9.6700515956847	8.49257341789966
9	2	7.84102023969748	0	0	0	4.63728469689252	6.91881648407847	7.84102023969748	7.84809920293041	8.10945879364384	8.63771788225579	9.1124981173888	9.68819453711082	8.52765388376382
9	3	7.94356700370659	0	0	0	4.77082435986812	6.95008192821569	7.94356700370659	7.89183816311166	8.09917299558799	8.73513792434525	9.078062024993	9.53855333170941	8.46768693325097
9	4	7.87054625554157	0	0	0	4.71460034465593	6.92059749003891	7.87054625554157	7.9718887200952	8.10958728579728	8.6769725519553	9.00866129624599	9.50414409384833	8.43241337988205
9	5	7.91315868645538	0	0	0	4.90398320864442	6.86514490847244	7.91315868645538	7.92497632558907	8.03805085462089	8.63285495957561	9.00414926932575	9.70269221648367	8.43310095321486
9	6	7.927244155352	0	0	0	4.78346278355425	6.87853475128824	7.927244155352	7.90664828010835	8.09985017282248	8.67030523899544	8.91833455721432	9.5356111627573	8.46146991850895
