# Supplementary material for: Two central pattern generators from the crab, Cancer borealis, respond robustly and differentially to extreme extracellular pH
Source: eLife journal article supplement (doi:10.7554/elife.41877), 2018-12-28
Supplement: supp [file elife-41877-supp-v1.zip › elife_poa_e41877_Figure_4_source_data_5.csv]

prep	bin	pH78_1	pH55	pH61	pH67	pH72	pH78_2	pH78_3	pH83	pH88	pH93	pH98	pH104	pH78_4
1	1	1.66448698094092	0	8.16310529366744	2.16991112805994	1.97495912832871	1.89866703075945	1.66448698094092	1.73804829485177	1.63658460964857	1.62208470774099	1.52180547912444	1.43673140563674	2.08525162402354
1	2	1.64249926790005	0	7.95158689393964	2.20205652337565	1.97618188484213	1.89096589125353	1.64249926790005	1.72622573026123	1.58210260133449	1.62342929353265	1.43493107418782	1.43425169083768	2.07586366926237
1	3	1.62888725240764	0	8.02584649567558	2.12421779895324	1.97414919114142	1.91342810582544	1.62888725240764	1.73627600769081	1.60749537384138	1.63309958063006	1.48274106591194	1.45333433488423	2.03597081865939
1	4	1.59378560328164	0	7.90395368108081	2.1500622891126	1.9947853545525	1.92624349755433	1.59378560328164	1.72661444729978	1.62665242509252	1.62088247494564	1.49057054669285	1.37261270260446	2.01783943606831
1	5	1.65084550828153	0	7.63184393798593	2.18268095956199	2.00238179192152	1.91091342447752	1.65084550828153	1.7166101270839	1.64051272164247	1.61224911642043	1.48919767403289	1.39058964033568	1.96536687086335
1	6	1.60426194423828	0	7.80844951624523	2.13054597058233	1.97107128895375	1.91788964702803	1.60426194423828	1.73732543067874	1.60111365208313	1.63386542422045	1.50186481336106	1.39776698971302	1.99669617819903
2	1	0.961756776949189	0.146979929890573	4.53452919539055	8.71918742075509	1.50393567883229	1.39503654787793	1.38445269988696	1.44643351433864	1.50887915665879	1.13368809433089	1.33670391959064	0.91545271853163	1.39503654787793
2	2	1.04306889593885	0.0733856083483468	4.34425873142942	8.57627595150432	1.51387295839137	1.3809551567466	1.42460586178962	1.48515455127191	1.52406244926188	1.11964552494186	1.29356980069302	0.917837967508687	1.3809551567466
2	3	0.992988697659328	0.0815670664812375	4.35116641629395	8.5686649691009	1.53438601794453	1.33482973426689	1.35751636245847	1.46141174712414	1.50230923927869	1.14441417204895	1.33309230784841	0.933335656605379	1.33482973426689
2	4	1.06266156333567	0	3.92316455092669	8.48146360785967	1.50163611087513	1.38835413636431	1.43331347026514	1.45488406929251	1.52133551928942	1.13182392754245	1.32244840610421	0.904042096318253	1.38835413636431
2	5	1.04076978564832	0.146295077170653	3.73262615025093	8.71443716441205	1.52123670616141	1.38875765656217	1.37111134371473	1.49151958463556	1.525984112826	1.14270388722082	1.32053058661278	0.922866707339015	1.38875765656217
2	6	1.0320746278819	0	3.41353705211761	8.6467237567808	1.54304787939653	1.40291459528437	1.36683364512005	1.45955671763808	1.50932559015395	1.14464589757472	1.34215868196526	0.910781607458138	1.40291459528437
3	1	0.810068876482747	1.80902083529542	1.48542440673785	0.992582415484066	1.01773925004782	1.208455071544	0.810068876482747	1.12822297969377	1.09731269195025	0.748181950162661	1.18297672893639	1.5443090805039	1.16001265111311
3	2	0.825958106249723	1.95727987098662	1.51718039194876	0.936415240561962	1.03216899183087	1.18509717391695	0.825958106249723	1.12901256312195	1.1012248439758	0.74262267102835	1.20405276054127	1.55475043717929	1.1631397389665
3	3	0.817864193734424	0.759155027854484	1.61595490033191	0.944378954839019	0.996690238658237	1.1765018413462	0.817864193734424	1.1483033544242	1.08977403477843	0.80347839423656	1.17215149878812	1.53471387346451	1.1706804173486
3	4	0.812584292832569	0.435108843546495	1.51337998245602	0.97931387850445	1.04577458857479	1.18828138386139	0.812584292832569	1.12818822229221	1.09202163341237	0.864960556101181	1.17254700994117	1.54760095919085	1.16538562437156
3	5	0.830363790900671	0.251952632905014	1.65828636804202	0.960436944274524	1.03361047962215	1.17664899363028	0.830363790900671	1.1413672220325	1.08912098341638	0.879126846972252	1.21324967529819	1.55215228580806	1.15582961161062
3	6	0.821334771533143	0	1.63308353973153	0.951062763244044	0.993691547772876	1.17262228608778	0.821334771533143	1.1502741878689	1.07817277266932	0.9075486558283	1.14619329272623	1.50478953313065	1.14436244755153
4	1	1.46790947052463	0	4.99984260866598	4.57739631775123	1.7679603962985	1.67120550976503	1.87882306056634	1.66979076058263	1.46954420102543	1.44004253581899	1.15889592157829	1.1993586167106	1.67120550976503
4	2	1.43941558238452	0	4.92774770811117	4.04864234697002	1.71637457990341	1.66051843225992	1.87424702194376	1.64766940197395	1.44719268772239	1.44913322060871	1.15779606423692	1.20177630426621	1.66051843225992
4	3	1.51256494429741	0	4.85470683375719	4.34805857749733	1.70684733188947	1.70279598812282	1.90310816668397	1.63800669251734	1.46315713847433	1.43054384167504	1.15796374633756	1.19862611894622	1.70279598812282
4	4	1.39905759743893	0	4.75759942934168	4.52303678739192	1.74571666391821	1.68636765398054	1.78906327030251	1.64673151780516	1.47365085067084	1.43372035950663	1.10947951617732	1.21144921342404	1.68636765398054
4	5	1.47741528879181	0	4.55422555677367	4.46346662418753	1.76794723013377	1.72375416067946	1.79531219952793	1.64702963238573	1.47736953798862	1.42919459692947	1.13125067577839	1.2068807657067	1.72375416067946
4	6	1.4260317633727	0	4.52788155383882	4.57143469097658	1.70114953893619	1.74920282513099	1.80002116996924	1.63350632885327	1.49377627059178	1.42991221482004	1.12682109596072	1.20330345291078	1.74920282513099
5	1	0.988030189486637	0	0.680980776586278	1.2809788376981	1.32659196789961	1.4455948852386	0.988030189486637	1.21283199682184	1.2980670130455	1.2535708444409	1.21957316874358	1.10515401101755	1.26226710777498
5	2	1.02364458530862	0	0.737729588484143	1.50036060067135	1.39999151107735	1.42209413947645	1.02364458530862	1.27214429194633	1.29186733570979	1.20672729344743	1.20042432514017	1.02431270974069	1.32758731247289
5	3	0.909916039439441	0	0.464801947306491	1.39806420336343	1.42609040758576	1.45774492569965	0.909916039439441	1.27771565224232	1.28612139312389	1.28042254373544	1.20419816902597	1.07059439504675	1.36111671068723
5	4	0.979396294357803	0	1.01904585014511	1.53142891149528	1.43252427728538	1.45564854736987	0.979396294357803	1.27439308799808	1.23845584235203	1.3144677705028	1.30625942579209	1.12778905502123	1.30919826083466
5	5	0.986979059432464	0	1.05230837350828	1.45249783075267	1.25137899486247	1.46525284495001	0.986979059432464	1.2071072989385	1.24691060626711	1.21658440950102	1.31720972676395	1.11372197617761	1.30270010365731
5	6	0.959159566246377	0	0.81926469597596	1.49203763985863	1.27672049621274	1.41094011106516	0.959159566246377	1.26118643911329	1.3238554042164	1.1594326085049	1.15876402731505	1.00963746657006	1.32023002714028
6	1	0.918049308934478	0	1.88266364808222	1.70443474852692	1.5411790334039	1.56109051417551	1.75120252314716	1.77293281108043	1.75989614789294	1.32098301777367	1.43799598274317	1.3595849287143	1.56109051417551
6	2	0.897258010067185	0	1.80934726454741	1.6898180778324	1.53193086382162	1.55016464646608	1.83595712347505	1.79167166352877	1.79537800796552	1.32893991748761	1.45147469131416	1.34953042748921	1.55016464646608
6	3	0.885727408360483	0	1.9148790881669	1.60880224487605	1.52456490241647	1.56136336666959	1.71155178161845	1.82353072544987	1.80367731147696	1.32475414697493	1.44612067187041	1.36014108146848	1.56136336666959
6	4	0.903088735335644	0	1.78921236867997	1.57872985011919	1.53061471047312	1.56545249715459	1.82660320503026	1.79576271893353	1.78897791284155	1.31298207705877	1.44299564054637	1.36880577080307	1.56545249715459
6	5	0.894492970946824	0	1.78583758013887	1.58498116457499	1.52974408524719	1.53955878066735	1.75986461592095	1.82341116504818	1.78296641541747	1.30807627427983	1.44549183437395	1.37073896533022	1.53955878066735
6	6	0.900869495599401	0	1.83404411334667	1.618186279549	1.55335267557225	1.51602377047832	1.76311471670205	1.77260015749058	1.80561587465344	1.31989099910318	1.45117825723907	1.39703364322189	1.51602377047832
7	1	1.77958662597507	0	2.48053788310643	1.93621974206172	2.0075031504226	1.7913994817588	1.77958662597507	1.50402147592539	1.62134946560865	1.29945282004066	1.76755499630001	1.2037510687607	1.74342474913023
7	2	1.76603110819587	0	2.40932178406228	1.9505163879354	2.00108102831705	1.81613472797782	1.76603110819587	1.57034420878203	1.64790111124331	1.30375481444598	1.44451035936091	1.20978587553279	1.72499457089899
7	3	1.68680679761427	0	2.42934016639188	1.95025267091886	2.00564327750322	1.80814696730175	1.68680679761427	1.55755741047903	1.81752249622788	1.30390081875842	1.68593096323192	1.19960788806369	1.70545899951282
7	4	1.65911181905227	0	2.41285650275087	1.94134536552503	1.96965154191929	1.80572590277986	1.65911181905227	1.55144675576019	1.61720475870392	1.73147456024576	2.04168879349304	1.19258140617233	1.6983311124532
7	5	1.81533750028498	0	2.42998841889808	1.9470614649043	1.94953513797774	1.82847017654081	1.81533750028498	1.82660502960875	1.59758149144787	1.3531807365899	2.24623421955409	1.24619421796556	1.70539440286793
7	6	2.08216345949513	0	2.42924864491076	1.97669533320981	1.95680705152226	1.82327742578073	2.08216345949513	1.80474227446886	1.63558047794167	1.65342082048954	1.47808735496268	1.19864083149572	1.6943689492004
8	1	0.626987660517893	2.06830540350044	3.47657594646029	1.62417847345058	1.26454451464982	1.04402498895294	0.876284178483842	0.845489435143728	0.97547024871824	0.574114669018944	1.04509058112278	1.15563734174293	1.04402498895294
8	2	0.521890964311789	1.82481827322362	3.34218883235501	1.63714014285591	1.27245549658598	1.0619337588138	0.874737634276404	0.827555899433869	0.974196597129614	0.588678137195867	0.99813864913908	1.14704864616926	1.0619337588138
8	3	0.532750693703327	1.67654751868711	3.20712936731809	1.62697003185979	1.2414955336493	1.07871748912982	0.873539068875	0.845060639363757	0.97445380508258	0.593527742998052	1.04499150063571	1.14830875126746	1.07871748912982
8	4	0.526313815638117	1.55762865896089	3.20738453080002	1.62879668460877	1.22498701119479	1.07697072351478	0.881372065443929	0.845892649885424	0.985000881613683	0.601492639913431	1.03419518003461	1.1520532471593	1.07697072351478
8	5	0.592838774887229	1.50735809431693	3.19035995682483	1.62316145614847	1.22325294818131	1.05451049751191	0.881328638801823	0.846040804114919	0.991314304416824	0.611421045271847	0.956681469637281	1.14352548581696	1.05451049751191
8	6	0.616408519601842	1.34947973530791	3.11952175216875	1.62736761871218	1.23894022793008	1.06622729588824	0.86458756164628	0.837616195239931	0.992532660196327	0.626415242994786	1.04407386826894	1.14668988514533	1.06622729588824
9	1	1.43754877795172	0	5.23888016011498	1.78013853398289	1.57081065696474	1.56163946135524	1.43754877795172	1.52608684384124	1.39258325574813	1.36823527468376	1.26748581392142	1.13845605802544	1.4410433813762
9	2	1.44024367602487	0	5.19860165251553	1.81597217786507	1.60502049350959	1.57058786239134	1.44024367602487	1.50871706699037	1.42479131787845	1.34123658729142	1.28765932617039	1.18092419598182	1.44392155295213
9	3	1.43746762695427	0	5.1739972477224	1.7986083874983	1.59984946812646	1.59426081109044	1.43746762695427	1.53198950716359	1.37760110259527	1.31975571375682	1.28493316119256	1.15585134340062	1.42494522346096
9	4	1.42428126620967	0.269400180498121	5.01674836807413	1.7594947934555	1.60071405391859	1.56852392397112	1.42428126620967	1.51548392453654	1.43579850127268	1.35652173539704	1.33042851745644	1.18739895534818	1.43776611816584
9	5	1.43203815291432	0	4.9628629606915	1.7468009651163	1.56437579793392	1.60431423126927	1.43203815291432	1.53576651629209	1.3884155303538	1.3801174582585	1.35553931143908	1.15167999011609	1.42206167561639
9	6	1.46284788116214	0	4.8150735996665	1.72558004119237	1.61308924605942	1.56204053681026	1.46284788116214	1.50817406673313	1.41581951574311	1.34246084391897	1.30066491829065	1.1729365039112	1.41865422346007
