# Supplementary material for: Two central pattern generators from the crab, Cancer borealis, respond robustly and differentially to extreme extracellular pH
Source: eLife journal article supplement (doi:10.7554/elife.41877), 2018-12-28
Supplement: supp [file elife-41877-supp-v1.zip › elife_poa_e41877_Figure_4_source_data_6.csv]

prep	bin	pH78_1	pH55	pH61	pH67	pH72	pH78_2	pH78_3	pH83	pH88	pH93	pH98	pH104	pH78_4
1	1	8.76897189532015	0	0	10.5906053550809	9.62207974163792	10.4827810455571	8.76897189532015	11.3770693122651	6.68877270236884	1.50502358541305	0.793562227422655	1.61236714658549	11.9817227313183
1	2	9.36174798735717	0	0	10.4419993875268	10.0255814622817	10.5284817277217	9.36174798735717	11.6850464696531	6.50658836914117	1.62668294099401	0	0.342849402968027	11.0221753019276
1	3	8.50826714861954	0	0	10.3250418748914	10.0069003459193	11.3771395602684	8.50826714861954	11.2862015377636	6.46183276797862	1.63518372616933	0	0.462938429587242	9.76122556625809
1	4	8.82046386441393	0	0	10.3867917146782	11.0591674816184	11.1922541526365	8.82046386441393	11.1402705427407	7.68225092296159	1.90492069532681	0	0.771992125680314	9.49795906307328
1	5	9.16026639183334	0	0	9.68000375804968	11.0644779935116	11.3709228186751	9.16026639183334	10.9229872319964	7.05752902505522	1.2129391922959	0.381988218055124	0.059147623596353	10.1093063471158
1	6	8.9498947504228	0	0	9.75893011442409	9.88990324363449	11.0019067682967	8.9498947504228	11.1216407277847	6.38224185120745	1.85842874519656	1.31101874560555	0	10.4419153882873
2	1	9.18355575842619	1.11068026418904	0	9.71249372609463	10.1743256868941	11.5550944487388	10.5474017499246	11.9889913997115	11.9984460610644	0.0562194131255464	3.44259807960447	0	11.5550944487388
2	2	8.66229121122668	1.17116160802831	0	9.24234282197808	10.3423130169482	10.7105916385113	10.9257009362495	12.3130967283552	12.9983322903098	0	2.16473416634317	0.197285353535353	10.7105916385113
2	3	8.53291235688717	1.14467047714706	0	8.30905412818206	10.1839542479441	10.6361468554876	10.3274966887465	12.2835542390605	11.4557209245556	0	3.81625286335109	0.251951938903537	10.6361468554876
2	4	8.82496866728464	1.15860463655554	0	8.96372416020295	10.2666991557219	11.2649256339611	10.9321052085991	11.9480434485453	13.2974118510609	0	3.04153733649996	0.0906228052289358	11.2649256339611
2	5	9.25212145598343	1.25782715594568	0	8.31061228489338	9.95491532249012	11.4171023199326	10.9271667225701	12.2683750222682	12.8454099145564	0	3.12993772443501	0	11.4171023199326
2	6	8.96774436623157	1.23203230719295	0	8.2195530413079	10.0842932557935	10.9181547850601	10.3599626314507	11.7940470917793	12.7932115525038	0	3.62139955106587	0	10.9181547850601
3	1	8.90302784502591	0	9.70348184989036	9.7983769041906	11.3335847068845	12.1869467907945	8.90302784502591	11.3615858757694	6.19014455583351	0	0	0	9.1093469700982
3	2	8.9000316152905	0	9.94242649888498	9.47778660164651	11.5124686830445	12.4643968932869	8.9000316152905	10.8435169832281	6.29230726516811	0	0	0	9.19619675209521
3	3	8.98620632080017	0	10.0973543696258	9.48342647505147	11.1525095838712	12.1199787968571	8.98620632080017	11.2924987864965	6.21031304825512	0	0	0	9.31933237778592
3	4	8.98632790392294	0	9.91406071017809	9.58200773866372	11.3938828817583	12.4578168156447	8.98632790392294	10.8658988428018	5.80271231106711	0	0	0	8.92355103883543
3	5	9.13048508196283	0	10.0067892286948	9.96199871743813	11.5868951971982	12.1947342071472	9.13048508196283	11.1803876979658	5.53920872518486	0	0	0	9.09244978100642
3	6	8.88275123630683	0	10.2064470436244	9.74870843057409	11.1068232267439	11.9215189626952	8.88275123630683	11.4847990762947	5.7889868847113	0	0	0	8.61264375878542
4	1	2.05443658764017	0	0	4.56230942974389	7.22836934946105	8.30758310776548	9.33975721734388	11.5480892967911	11.8315397838505	9.40041000856866	1.16155818522398	0.418783356514424	8.30758310776548
4	2	3.30274572830054	0	0	5.76800282500953	7.28918063483041	8.31633683138664	9.72665215254028	11.5385008526728	11.7094729095834	9.24458274200323	1.09816366180795	0.56887064343778	8.31633683138664
4	3	2.76524252149069	0	0	6.16009892904122	7.28381124902555	8.32665349793266	9.07442311529807	11.649091515442	11.9666616992509	9.1572341937693	0.908775526334693	0.628286890067299	8.32665349793266
4	4	2.89057018565988	0	0	5.35510744761635	7.17498689000066	8.34621017516411	10.7314270114769	11.6129663270979	11.7902896978678	9.02438208516904	0.724057120442433	0.381741026802591	8.34621017516411
4	5	2.74958630706489	0	0	5.4481045401977	7.16757179677958	8.28778952304937	11.0470443645019	12.119774645536	11.6603588716688	8.98768783444286	0.940787803530348	0.466667920408233	8.28778952304937
4	6	3.42838758228511	0	0	4.32890418680311	7.23815493319852	8.23284016704878	11.1710520159014	11.5091952500531	11.7535863454042	9.43512907000085	1.10831963830716	0.704229058973702	8.23284016704878
5	1	10.1011463838298	0	9.30271558285612	9.19093208770855	10.4786196138394	12.1668323863476	10.1011463838298	10.7869295818657	11.2143627198338	9.5463029182282	10.6939695328748	3.97541325689096	8.326783772463
5	2	10.2347714185941	0	8.95265080309586	11.479976016749	12.0111982862728	11.42542430287	10.2347714185941	12.0773568389139	11.3219464266219	9.50723168234082	9.75405539111	3.06743190402911	9.80062812017009
5	3	9.31215680153354	0	7.57136350137925	10.3124796821869	10.8541859824473	12.440382182021	9.31215680153354	11.3877728225141	11.1824254005778	11.0277638259611	9.47048142553348	3.96632363388068	10.4130246421123
5	4	9.40478874992155	0	5.73541443285547	11.7274353834407	10.7569910480448	12.2792210608039	9.40478874992155	10.7097049753491	12.0343887708718	12.7846470633456	11.7895686459011	4.41942546288746	8.77732656293108
5	5	10.0140333187784	0	5.45801309754151	10.2791798776776	8.00272076876587	12.3453608473191	10.0140333187784	10.7647296967102	11.0725010051486	9.89674760074047	12.1109886010643	4.3378911841175	8.59509591602864
5	6	9.62639766559864	0	5.86454401255732	11.1118211594392	9.35860548259189	12.0566614412735	9.62639766559864	11.2189618302621	13.2966906350077	9.28698539709399	8.03931479809834	3.84968164143197	9.33987212311473
6	1	5.85091970468437	0	6.78010267822209	11.8112824192254	11.7762797015434	12.852670822148	17.0782415582327	17.5748649090434	16.5293113583733	0	0	0	12.852670822148
6	2	5.80849582007975	0	7.42923937792928	10.3583072199319	11.9529583735785	12.4769358615246	17.8455810382819	18.1573324133223	17.0026755331352	0	0	0	12.4769358615246
6	3	5.70421890456184	0	6.54118958921783	8.58898178827836	11.5937543833003	13.0113134559233	16.3670653511815	19.2497482435627	17.0460828094538	0	0	0	13.0113134559233
6	4	6.46802008971787	0	6.53925070369725	8.32922227407363	11.336516666924	12.4398231113619	17.8453831227107	18.6638843023499	16.4568845637049	0	0	0	12.4398231113619
6	5	5.91400628511456	0	7.55351871674721	8.87958472237611	11.9996872968865	12.0785190583136	17.1384024565586	18.3891190315092	17.2379446774865	0	0	0	12.0785190583136
6	6	6.33411443914312	0	7.82335910321113	9.49952350483659	12.6447007440119	11.247192259742	17.6879129009188	17.2391575994315	16.5957062480714	0	0	0	11.247192259742
7	1	11.4557055555516	5.20653688908529	12.7937962297905	15.1628953299405	17.076990913927	13.8195465623585	11.4557055555516	6.49732590768377	5.37807368775161	0	3.65090952570866	0	12.6320996680653
7	2	10.9006524038669	4.52635426901149	13.1676153296047	14.852974517927	17.8829482288367	13.9596482149779	10.9006524038669	6.71660064737973	6.23873482564165	0	2.24832870623473	0	12.2320054108144
7	3	8.24970898284715	4.96425258595394	12.6199827381438	14.3114004596516	17.6932624480265	13.8642248558013	8.24970898284715	7.28978171581451	6.27978542236294	0	3.86053002760802	0	12.4869126501289
7	4	7.61180310073434	5.02940711515214	11.5680131517405	14.6083133763642	17.3260386223715	13.6958701217628	7.61180310073434	7.431083620997	5.81345092614023	0	1.85882986157501	0	12.7001097960109
7	5	7.95652282915702	5.26741721288895	11.2029263371837	14.3902784296532	17.6145142204957	14.3071686619956	7.95652282915702	13.6349688828493	5.66324647556986	0	0	0	12.5691416663193
7	6	7.60866183223632	5.41747401446778	10.8393420618362	14.6827060500901	17.579865463845	13.9332488505473	7.60866183223632	16.0993200293946	6.78875964839754	0	0	0	13.0654625125449
8	1	3.63496699530501	2.21630487698859	0	7.70006953195259	9.13925493656979	8.68331414178373	7.8991980329212	8.49786470750987	6.82177060668274	0	0	0	8.68331414178373
8	2	4.2484522572205	2.25403077101886	0	7.660700476941	9.39147081580531	8.67606828755023	7.77454437769366	8.48312685804693	7.33955927145573	0	0	0	8.67606828755023
8	3	4.03503258247928	2.33991366104171	0	7.57618555806357	9.09804920465398	8.64045380550502	7.021709867348	8.87989492966425	6.86330806031966	0	0	0	8.64045380550502
8	4	4.05801431723784	2.37519566600545	0	7.47492006094558	8.92743846557233	8.58342462069463	7.79579397228396	8.98772946547486	6.90436230327987	0	0	0	8.58342462069463
8	5	4.28042221028966	2.4920536107559	0	7.47801650206896	8.99624987408613	8.46677527862115	7.94994990328828	8.63515008197141	7.41327641900041	0	0	0	8.46677527862115
8	6	4.00238385071242	2.61434323125773	0	7.40615094940129	8.92306193327636	8.46255029951551	8.11587968413624	8.63830185386437	6.66504187518699	0	0	0	8.46255029951551
9	1	7.79010635883214	0	0	0	5.78368619826583	8.7173775226828	7.79010635883214	9.31202432279868	9.43543969370426	6.97265227338591	3.19045931807587	0.500691344381439	7.6765315628011
9	2	8.00242813852223	0	0	0	6.12598146824025	8.81518406141901	8.00242813852223	9.04466092444808	10.2607047560066	6.70825252661144	3.04832943080574	2.49268657605121	7.52340135112194
9	3	7.70621337449735	0	0	0	6.14814434732706	8.97832733501512	7.70621337449735	9.10843734213617	9.14770460048715	5.2094690355519	3.44869297539077	1.00682537644936	7.50811223240888
9	4	7.99382258999985	0	0	0	6.17813738070273	8.92501425079295	7.99382258999985	8.76319309475943	10.4225707110304	6.58686811884672	5.21869140955004	2.45938463059931	7.76275437990497
9	5	8.00472950015397	0	0	0	5.95926081846174	9.1810070879858	8.00472950015397	9.27115244912804	9.18569991771937	6.51000223628164	5.07741470902675	1.46595626504398	7.50779125928519
9	6	8.26683988256887	0	0	0	6.32175585998749	8.98667066660993	8.26683988256887	8.74965377866204	9.69564220869871	5.96320900561808	4.25833595938121	2.41149062600058	7.27065035858775
