# Supplementary material for: Two central pattern generators from the crab, Cancer borealis, respond robustly and differentially to extreme extracellular pH
Source: eLife journal article supplement (doi:10.7554/elife.41877), 2018-12-28
Supplement: supp [file elife-41877-supp-v1.zip › elife_poa_e41877_Figure_6_source_data_1.csv]

bin	pH78_1	pH55	pH61	pH67	pH72	pH78_2	pH78_3	pH83	pH88	pH93	pH98	pH104	pH78_4
1	0.1250966371522	0.113952711903614	0.143481080584714	0.152391634308843	0.152251726915213	0.193164674816928	0.1250966371522	0.15932624119125	0.191608321932638	0.187419995089596	0.227669427454747	0.197032299504858	0.167292619886074
2	0.114622770730388	0.114863180722283	0.140802036560657	0.148186347295451	0.149076091026824	0.154577691853247	0.114622770730388	0.165135708568899	0.198176255323816	0.196741409896249	0.218010960784371	0.196954865260399	0.193566121942727
3	0.121063763073373	0.110839554203313	0.141870099298608	0.147170189635895	0.154987337534523	0.152061189422624	0.121063763073373	0.193518255135158	0.198398336409521	0.196301357687453	0.217245691092941	0.205697900522843	0.197865422696085
4	0.119020981018534	0.114927865525203	0.136439049947607	0.145574604801342	0.154006155229439	0.157894134789912	0.119020981018534	0.164869316336406	0.208668842102044	0.192057478379614	0.218389868193804	0.197630915068541	0.202759714587375
5	0.126183127847675	0.11712715206501	0.138041277102679	0.145504494911563	0.152486908998862	0.156687991902365	0.126183127847675	0.158728213580531	0.19233322825586	0.208170009631166	0.222075503985161	0.178624697007858	0.192328621618229
6	0.121653317242655	0.117237280048208	0.134228872435504	0.152224378734254	0.149669718693548	0.154946390050434	0.121653317242655	0.157825542801498	0.187830831346232	0.193987341887292	0.214148475264336	0.195195468706167	0.186863332187456
7	0.124973130776883	0.113990641368344	0.139246869382259	0.151329552230891	0.155675944952986	0.15147010775198	0.124973130776883	0.15790886266558	0.185592477414656	0.185637550360039	0.214391141911683	0.203253641094331	0.183482387457339
8	0.130064381869025	0.110323731208065	0.136521225900579	0.144742517535556	0.152236263963956	0.153604168202708	0.130064381869025	0.158958957420724	0.187948527244636	0.194890044074146	0.21580172356422	0.196501558555501	0.17685707391907
9	0.128872264055805	0.110927833679243	0.141343355519529	0.152148199166769	0.149035738770157	0.151418914455279	0.128872264055805	0.199241289170838	0.184780603274909	0.192840372612119	0.216096731262918	0.193058578864212	0.174787589382004
10	0.123501616636162	0.11168030841634	0.156563341943365	0.143957803088758	0.152847534461518	0.147471961893245	0.123501616636162	0.164880590657578	0.188035327392308	0.200171536303523	0.208534977742335	0.191000310673527	0.182926236096523
11	0.126708987468481	0.112180817528926	0.147825122879633	0.148320774825239	0.153871009932374	0.15296883970291	0.126708987468481	0.158820046171419	0.193299544013009	0.193466851527284	0.21219733992895	0.19499844404453	0.178982935634953
12	0.131315639939826	0.117566145652698	0.144556089931235	0.147627406142186	0.16034460357347	0.154881716832855	0.131315639939826	0.171259562705833	0.188993796159702	0.195064388159447	0.208073961065551	0.199885964787516	0.181300281585064
13	0.126043641350381	0.120309291125626	0.140957977040568	0.148350590337182	0.148343522060907	0.149003514437114	0.126043641350381	0.161115412208123	0.177017468083751	0.198061789655445	0.214484003300987	0.195678803656693	0.18163336825495
14	0.127660280673893	0.105995081828203	0.142910836499999	0.146677246985416	0.154814568294505	0.155532847759783	0.127660280673893	0.190607257339155	0.179787201220084	0.199153421553329	0.210754409790564	0.19299984652833	0.175340467352481
15	0.128882587962366	0.114302676060184	0.141782763077086	0.153152955999029	0.15744213214433	0.150309951860125	0.128882587962366	0.166719739116952	0.179862469456423	0.201718445692211	0.212565974688874	0.189819117127507	0.178486434926317
16	0.127753660105369	0.113409030080611	0.140718621858105	0.141170159451695	0.154811924932368	0.148218854031108	0.127753660105369	0.157054225406556	0.192923230750628	0.192935247324543	0.209828619832366	0.192807071907379	0.171406109870039
17	0.126672552717949	0.114159421348725	0.142506902426312	0.145795846476552	0.151050865868762	0.151705963017476	0.126672552717949	0.163813959797765	0.179418041813433	0.19675064283028	0.218391635838678	0.196155171955923	0.174875164870661
18	0.130865215371428	0.107232051231184	0.144653533090219	0.155353802750383	0.154768335017728	0.152603957631037	0.130865215371428	0.173257977663581	0.171974368940053	0.203577703835025	0.213806591786418	0.192572771503376	0.163295965773165
19	0.134434304136361	0.112713140548778	0.142659050575487	0.146161435605364	0.153764745794294	0.150658459349759	0.134434304136361	0.169645405297541	0.179664312476676	0.205871300520153	0.216808403383171	0.193714695266122	0.17757537296417
20	0.152845836632256	0.111477749041291	0.143047035808976	0.144508252866321	0.148895271532862	0.153690571698189	0.152845836632256	0.166525359051874	0.18634154763418	0.196998809996476	0.207797354083516	0.195480469561061	0.173266920551004
21	0.137790203392119	0.118492397527775	0.145033684073126	0.147628693195932	0.156095136828996	0.153715242924656	0.137790203392119	0.156244384967415	0.188074351597819	0.197193305753168	0.212166758506016	0.197663018942338	0.16681318424683
22	0.133036205748701	0.11000011000011	0.139127837768608	0.154064926041132	0.160403704042334	0.157834012282642	0.133036205748701	0.154654713426532	0.187855132573385	0.200859516323836	0.209596754687968	0.192638511906023	0.176616958771959
23	0.130793669063243	0.109369463170927	0.142248927087467	0.146103836563559	0.15478355306961	0.154475004141833	0.130793669063243	0.164162238319923	0.185843737326749	0.199975162009077	0.212518247918724	0.199763449538627	0.185213630704413
24	0.133613208467336	0.106862699490321	0.137033793903915	0.151285930408472	0.155908706098057	0.155247200116746	0.133613208467336	0.156352117476727	0.18167911471401	0.199979366734139	0.21506915227825	0.19074141186793	0.187914607628244
25	0.129186014438007	0.108138737674887	0.140047820279329	0.149202341641591	0.156510999716923	0.160840266700426	0.129186014438007	0.173068378249149	0.174949402982467	0.201266257438968	0.212900712921074	0.189601880567715	0.187850044303516
26	0.14662885597234	0.111805547791281	0.161831413743047	0.151307218716098	0.153926906269289	0.161927956388629	0.14662885597234	0.159573110016085	0.184539068883376	0.203281692811345	0.22320646687001	0.194411510388791	0.1880523025162
27	0.132296656731187	0.105313153928866	0.149073242252085	0.15403576918409	0.155347849658241	0.155444844283127	0.132296656731187	0.156901630239841	0.182399729580962	0.204473527155799	0.208336678145458	0.192436998707304	0.187195875665767
28	0.129802933587319	0.102603354924499	0.142010758735082	0.146464565095444	0.156141166750227	0.160708664199978	0.129802933587319	0.161870209259378	0.182640056750273	0.200343698502276	0.210693826760787	0.194672418423099	0.201458943627696
29	0.13077382797226	0.113543722281139	0.14402378032527	0.149012335364917	0.1534686210384	0.161506793783281	0.13077382797226	0.158268667393647	0.181868236527049	0.204756610036361	0.202380921602929	0.194677179156527	0.196253015807938
30	0.123551512950052	0.112418159579825	0.140135511039175	0.149895373029626	0.15812997431335	0.153395800167113	0.123551512950052	0.181467498164348	0.197895970046466	0.198910375268471	0.208012469355149	0.185573966650108	0.197449492649151
31	0.133231480528007	0.110165523699358	0.140220368771283	0.146120923554858	0.162118959650212	0.155922823179849	0.133231480528007	0.170740902196727	0.180924769304948	0.196406915911957	0.208079825927665	0.183973345680242	0.201457107740393
32	0.127950212013501	0.106024075947166	0.142758231796541	0.146958761901822	0.157925858202395	0.156160695602204	0.127950212013501	0.163865656380274	0.179633427224191	0.194343830343365	0.216064644767238	0.199917441322665	0.193408976183323
33	0.131132922887284	0.108664234036681	0.139974272728672	0.149687153848457	0.154290986629144	0.156524786844035	0.131132922887284	0.161082990161499	0.186516455549783	0.202519628632395	0.203704554830361	0.201538518739836	0.194701017118114
34	0.133587594854216	0.111355102513507	0.13700310360651	0.147715360630212	0.154888578573108	0.154598931721382	0.133587594854216	0.162293019014107	0.175574640682256	0.196240667364797	0.209450775725457	0.190673784544117	0.202054759085294
35	0.130469612322594	0.111282781666354	0.138456404924064	0.147262825855818	0.154226252647259	0.151155509821576	0.130469612322594	0.165360046697677	0.180832480406802	0.200884624414104	0.203735488645514	0.194392706617102	0.208635079825736
36	0.125705364225008	0.106703998839061	0.135292000725165	0.144905378353935	0.154564283285419	0.157572128641885	0.125705364225008	0.163790091126217	0.179699659259794	0.20120411603556	0.204720604779244	0.191544828193864	0.205452726637456
37	0.129687220361931	0.105832424938352	0.137978316139031	0.158683057568626	0.151701948950152	0.152477712311612	0.129687220361931	0.168261241548394	0.20133761273839	0.197446491319063	0.212506753024888	0.192233905949132	0.203021005051198
38	0.132347901716136	0.110087905192296	0.135279738206651	0.145311849594168	0.156571951074398	0.149486439337655	0.132347901716136	0.168755579481345	0.180538395659073	0.203483467230011	0.215592731662759	0.193060831566211	0.20710471768317
39	0.135265648206513	0.112595748609724	0.133685890214018	0.149391528305214	0.154812241142479	0.154811200991815	0.135265648206513	0.171161424948707	0.181212487340506	0.202229677966808	0.209006226835078	0.184221926477304	0.217690131664791
40	0.13629994711562	0.106954960196711	0.138521038575339	0.143131696080827	0.158798971617859	0.156338917759477	0.13629994711562	0.168174739101481	0.179392906410346	0.209791831112961	0.207626649407387	0.19426477302751	0.228232509754342
41	0.131993583847821	0.106836008863115	0.13574083274286	0.154892272424529	0.152700430121342	0.153342733569747	0.131993583847821	0.180096459663797	0.186546978125502	0.201288815449877	0.214037313234501	0.186261674707516	0.229386270850507
42	0.139292838119435	0.111329812342469	0.1403923244402	0.144067538990117	0.152021428940623	0.157505592802322	0.139292838119435	0.176398431601939	0.18169740131371	0.195353357364432	0.210141192980082	0.18706117369381	0.232250279209246
43	0.136904908588593	0.112554687508793	0.141075759093391	0.146356741630591	0.150105049176559	0.153765958984468	0.136904908588593	0.171979953152991	0.184980913401624	0.201231329618412	0.212397983437454	0.191580983294506	0.221168072517481
44	0.133534526871152	0.10450303581319	0.138394976979404	0.148409907082907	0.150271089044637	0.159622524318921	0.133534526871152	0.170928144502267	0.186223351276394	0.19945737731678	0.213684961893908	0.185817488319193	0.224647400024209
45	0.140498770635757	0.10717286554521	0.14372606960941	0.147825559926265	0.154008077372502	0.156022548378691	0.140498770635757	0.174040471371213	0.178804944557167	0.203096891750995	0.216958668010991	0.188413172230902	0.228361072387484
46	0.137151812600737	0.106845939907707	0.134628821607388	0.144753839193148	0.163157954847668	0.151896801599929	0.137151812600737	0.171761754311206	0.181220280770638	0.205066669222783	0.207917304321356	0.183111950984593	0.227179568065387
47	0.138922654811934	0.111982619875296	0.137914670278038	0.145802775501634	0.155480315029882	0.154215797249407	0.138922654811934	0.18240421816093	0.205553363626914	0.201592195709814	0.202199122264275	0.183212638265698	0.228979227246132
48	0.139943714637972	0.103704963526964	0.139389141028358	0.157392468451211	0.148465754888978	0.157873828305266	0.139943714637972	0.177271589012384	0.177955891852645	0.206370533433011	0.198221714393076	0.191160099693473	0.236042779644127
