# Supplementary material for: Two central pattern generators from the crab, Cancer borealis, respond robustly and differentially to extreme extracellular pH
Source: eLife journal article supplement (doi:10.7554/elife.41877), 2018-12-28
Supplement: supp [file elife-41877-supp-v1.zip › elife_poa_e41877_Figure_6_source_data_2.csv]

bin	pH78_1	pH55	pH61	pH67	pH72	pH78_2	pH78_3	pH83	pH88	pH93	pH98	pH104	pH78_4
1	18.315	16.005	13.035	13.86	11.055	4.29	18.315	16.17	14.85	14.355	11.55	14.85	15.345
2	18.81	14.85	12.54	14.19	12.54	7.92	18.81	16.335	15.345	15.345	15.345	14.85	15.345
3	18.15	15.51	11.715	12.705	12.87	8.25	18.15	17.49	15.345	14.355	12.375	14.85	16.83
4	18.81	15.84	12.87	14.19	11.88	7.755	18.81	17.82	16.335	14.355	13.365	14.355	17.82
5	18.48	17.16	12.87	13.035	12.54	8.58	18.48	16.83	15.84	15.84	12.87	12.87	16.335
6	18.15	16.5	13.53	13.2	11.385	8.745	18.15	14.85	14.355	14.85	14.19	14.355	15.84
7	18.15	15.18	12.21	15.015	13.53	7.755	18.15	15.345	14.355	14.355	13.365	14.85	15.345
8	17.82	17.325	12.705	13.53	11.715	8.58	17.82	16.17	13.86	13.86	12.87	14.85	16.83
9	16.335	16.83	12.54	13.2	12.21	9.075	16.335	16.83	14.355	13.86	13.365	13.86	15.84
10	17.82	16.17	13.035	10.23	12.21	7.92	17.82	16.17	14.355	13.86	13.365	14.355	15.345
11	18.15	17.49	13.53	12.87	11.88	8.415	18.15	15.84	16.335	13.86	13.365	13.365	14.85
12	17.82	17.16	12.21	13.53	12.87	7.92	17.82	14.52	16.335	14.355	13.86	14.355	15.345
13	17.82	16.5	11.55	13.695	12.87	8.25	17.82	14.685	13.86	13.86	13.2	13.86	14.355
14	19.47	17.16	13.86	14.52	11.55	9.24	19.47	17.655	13.365	15.345	13.365	13.86	15.84
15	17.49	16.17	12.705	14.52	12.87	8.085	17.49	16.5	14.355	13.86	13.365	14.355	15.84
16	18.15	17.49	12.87	13.2	13.365	8.25	18.15	14.85	15.345	12.87	14.355	14.355	15.84
17	17.82	16.83	13.035	13.365	12.54	9.24	17.82	15.18	14.355	13.86	13.86	13.86	15.84
18	18.81	17.16	12.21	13.53	11.88	8.91	18.81	16.83	13.86	13.365	13.365	13.86	13.86
19	18.48	16.83	12.54	14.19	13.2	7.755	18.48	16.17	13.86	15.84	13.365	14.355	16.335
20	18.81	16.5	13.365	14.52	11.88	7.59	18.81	17.325	14.355	14.85	12.375	14.355	16.335
21	17.82	15.51	14.52	13.53	12.87	9.24	17.82	16.83	14.355	14.85	14.19	14.355	16.83
22	17.985	15.51	12.87	14.19	12.87	7.92	17.985	15.015	13.365	14.355	12.87	13.86	15.345
23	18.15	16.17	11.88	14.19	12.705	8.58	18.15	15.675	14.85	13.86	12.375	13.86	15.84
24	16.5	16.995	15.18	13.53	10.56	8.58	16.5	17.82	15.84	14.85	13.86	13.86	14.85
25	18.81	15.84	14.685	13.035	12.54	8.745	18.81	16.995	15.84	13.365	13.86	14.355	15.84
26	18.48	14.52	15.84	14.19	13.2	8.58	18.48	16.83	14.355	13.365	11.88	13.86	15.84
27	16.83	14.85	14.19	13.365	13.035	8.91	16.83	14.355	14.355	13.86	13.365	14.355	16.335
28	18.975	16.83	14.19	14.52	12.375	9.075	18.975	15.675	14.85	13.86	13.365	13.86	16.335
29	18.81	15.84	14.025	14.025	12.21	8.58	18.81	14.52	14.355	13.365	12.87	13.86	15.84
30	19.14	16.5	13.53	15.51	11.88	10.395	19.14	15.18	16.83	13.86	12.87	13.86	16.335
31	19.965	16.17	19.47	13.86	14.52	9.57	19.965	16.665	14.85	14.355	13.2	14.355	16.83
32	19.8	16.5	19.8	14.19	12.54	9.24	19.8	16.83	14.85	14.355	12.87	14.85	17.325
33	19.8	15.18	21.78	14.85	13.2	10.065	19.8	15.51	15.84	14.355	13.86	15.345	16.83
34	20.295	15.51	19.965	13.86	11.385	11.55	20.295	15.84	15.345	14.355	12.87	14.85	16.5
35	19.47	16.665	14.85	13.53	12.375	9.57	19.47	15.84	13.86	13.86	13.86	14.355	16.83
36	19.8	15.51	15.18	15.015	12.21	9.9	19.8	16.335	15.345	13.86	12.375	15.84	17.325
37	20.13	17.82	16.5	16.83	13.365	9.075	20.13	16.335	16.335	14.355	12.87	14.355	17.325
38	19.635	15.84	14.85	14.19	12.54	9.57	19.635	15.51	15.84	14.355	14.355	14.85	18.81
39	22.11	16.5	14.19	14.52	11.715	9.735	22.11	15.84	15.84	12.87	12.87	14.355	18.315
40	19.47	16.83	12.54	12.375	12.21	9.57	19.47	15.345	15.84	15.345	13.365	14.355	19.8
41	19.8	17.49	12.21	13.86	11.55	9.075	19.8	15.84	14.85	13.86	13.2	15.345	20.79
42	20.79	16.17	13.695	14.355	12.87	9.075	20.79	15.345	13.365	13.365	12.87	14.85	21.285
43	19.47	16.83	12.87	12.87	12.375	8.25	19.47	15.345	13.86	12.87	13.365	14.355	21.285
44	20.625	15.18	14.685	12.705	12.21	9.57	20.625	14.85	14.355	14.355	13.86	14.355	19.8
45	21.12	17.16	13.53	12.87	13.53	8.58	21.12	13.86	14.85	13.86	11.88	15.345	19.47
46	19.965	16.5	13.86	14.025	15.84	9.9	19.965	15.015	15.345	13.365	13.365	14.85	19.8
47	18.48	17.16	13.035	14.52	14.355	9.57	18.48	16.17	15.345	13.365	12.87	15.345	18.81
48	18.48	18.81	14.19	13.53	13.53	9.24	18.48	15.345	15.84	13.86	12.375	14.85	18.81
