# Supplementary material for: Two central pattern generators from the crab, Cancer borealis, respond robustly and differentially to extreme extracellular pH
Source: eLife journal article supplement (doi:10.7554/elife.41877), 2018-12-28
Supplement: supp [file elife-41877-supp-v1.zip › elife_poa_e41877_Figure_6_source_data_3.csv]

bin	pH78_1	pH55	pH61	pH67	pH72	pH78_2	pH78_3	pH83	pH88	pH93	pH98	pH104	pH78_4
1	0.141127771203254	0.134414060853027	0.196639386130545	0.295970460405606	0.275336590505278	0.334089894976366	0.141127771203254	0.155453020267891	0.220462619132474	0.241981704060079	0.282387657609632	0.245425402586246	0.183973367014914
2	0.126292515018449	0.115159527728546	0.216288824401556	0.213121604680318	0.26825197876009	0.23403411094304	0.126292515018449	0.191435882916181	0.236091477671912	0.255741042472378	0.256999813843921	0.252065456235839	0.211177059736449
3	0.116722416529562	0.136633026861966	0.210506389707191	0.235998130488223	0.289286965254939	0.212545048127367	0.116722416529562	0.226701967480432	0.228663384016379	0.270496343593053	0.233665701245752	0.261031235619777	0.215618836382516
4	0.117692706870368	0.122780886576541	0.230221795319596	0.247703924545771	0.2963345548939	0.251035201881758	0.117692706870368	0.203785069764452	0.236679179537073	0.271735641344946	0.27618412011009	0.24015900681381	0.210413280520362
5	0.139929803921595	0.152711552133881	0.26546441917062	0.248084152705547	0.233890520498815	0.222025317645731	0.139929803921595	0.20964329106494	0.271810862470297	0.322935813899586	0.259481544960115	0.194834888261321	0.197105420219759
6	0.1325753520647	0.145423466917398	0.212645207760645	0.274698024888686	0.230311750997719	0.235946928162683	0.1325753520647	0.176785125258241	0.221818658138349	0.273627712154524	0.257858074386416	0.241471337906865	0.19628827949149
7	0.123837125018121	0.11965597624435	0.201234005756466	0.276320477892032	0.28433744317828	0.211525883299221	0.123837125018121	0.201187225660646	0.256343652531515	0.247992603580962	0.246194941861385	0.223530705947919	0.179402883386812
8	0.114183520842817	0.130369313047297	0.192431027785217	0.240560616718917	0.258759444205731	0.259846027181793	0.114183520842817	0.207065711018825	0.249507087654321	0.278037361783129	0.228028237374482	0.272196230204032	0.212815199185529
9	0.12512613614361	0.101371400807778	0.21331680558363	0.259430889915509	0.233536021938061	0.256799156265402	0.12512613614361	0.210797283942748	0.223779901358258	0.24834508211149	0.277603129311965	0.237725877772084	0.17969912064364
10	0.126867035689497	0.12628362554486	0.241898416804718	0.252234225103937	0.258593320150851	0.23279481488582	0.126867035689497	0.200114517963998	0.216945096119574	0.25939079517757	0.247085417400661	0.229785147633215	0.187503040493767
11	0.131546736610027	0.137401308925778	0.210983406629957	0.238847887032002	0.221895844713378	0.269723516503808	0.131546736610027	0.211285012808543	0.261584989111541	0.26537673740776	0.258379498572366	0.228745939464427	0.207895570437423
12	0.118556728399956	0.128127112516681	0.224245525627625	0.249847574703158	0.268274348608439	0.294995461965697	0.118556728399956	0.178940554093189	0.260724420541354	0.278529548384121	0.25827694927294	0.255412392561026	0.199455772218727
13	0.122358125277294	0.141275591290089	0.200151328980601	0.23871523229747	0.231310570514352	0.236708263365193	0.122358125277294	0.17234392954977	0.215639139270264	0.279402087719098	0.2439578536024	0.219385327323259	0.17656760675125
14	0.136825012223475	0.11074154159247	0.202816200944066	0.266810312583881	0.274532806377216	0.216814345105616	0.136825012223475	0.229279327756619	0.22386228507423	0.291489748368952	0.256570883721597	0.232466473982724	0.204048962072106
15	0.128550070885424	0.120298587601385	0.227660570225435	0.244474009180462	0.2533369859908	0.254626824986952	0.128550070885424	0.221677233919467	0.237529817382292	0.27298170867095	0.255207491265973	0.219354346209307	0.226092337017111
16	0.122054769080487	0.143959154603724	0.217353983322029	0.193555582221031	0.23517189166519	0.225160743347198	0.122054769080487	0.170204266927056	0.256112044144747	0.219135290862979	0.275247561890422	0.24750857687867	0.206463034378837
17	0.120632805404356	0.129477332505299	0.217728045093588	0.262638919852147	0.227524384412377	0.2821209581165	0.120632805404356	0.175082639428849	0.218368038701605	0.276777115719448	0.268229901101212	0.229712130461801	0.219975204005833
18	0.147112131859793	0.115156499817167	0.192438381211243	0.223942506664676	0.231516404669666	0.251816368605702	0.147112131859793	0.21280930880462	0.21794655724511	0.245678366464181	0.235809744322862	0.255073757564067	0.169819639605804
19	0.143253064924085	0.126816935825648	0.177105504927446	0.239994628989732	0.277908986812582	0.210652736585599	0.143253064924085	0.214849205052534	0.222409051845517	0.287868575040798	0.252347791385714	0.225445523806693	0.207307879187219
20	0.150062513947181	0.104105725497189	0.215225641117655	0.220349074135624	0.25633958842369	0.239457595234365	0.150062513947181	0.215401267356103	0.249784156916906	0.288811955013469	0.234902469466397	0.237537465535771	0.210178074583485
21	0.140380659215891	0.108440687445492	0.171847511584569	0.228409162704546	0.231712520410798	0.245298735530687	0.140380659215891	0.197661646534574	0.22360574085242	0.28032761143929	0.281751205436521	0.23906199444256	0.223177691071989
22	0.138523851516979	0.0925892925892904	0.211438149538056	0.289455642396816	0.27598419702708	0.209469409400907	0.138523851516979	0.189659800410566	0.226736251831603	0.286447340664036	0.246015858667844	0.23622297522476	0.207191149203514
23	0.126546798628761	0.102643241185916	0.156525029409965	0.233199691210747	0.263496535151524	0.228892686068048	0.126546798628761	0.206819701466665	0.222408345906597	0.271112351717539	0.234806142473254	0.23142597484578	0.208208798993258
24	0.149239273197591	0.122734714121389	0.200847691049088	0.277202723146748	0.273303284528711	0.236857548274116	0.149239273197591	0.258185815110493	0.266010926181959	0.296657704843019	0.26548480280867	0.246615293646405	0.19822004062983
25	0.140632472310082	0.126720216969563	0.198226809071596	0.225516781894067	0.236541769621449	0.236518621583207	0.140632472310082	0.222384372115796	0.27900754629627	0.268360820037503	0.263932089371814	0.245416057954207	0.195607469674348
26	0.144012997181797	0.0982547153989729	0.224880932537343	0.247954704671009	0.250445233576387	0.26427853020485	0.144012997181797	0.229670385783951	0.255741360958645	0.254523597271071	0.256690609673917	0.199578682090268	0.207035047328151
27	0.163084734685665	0.11301049234953	0.223429020313179	0.259468000385798	0.261778876187003	0.23133301726215	0.163084734685665	0.197837124772145	0.26067457224702	0.269486166582056	0.243027202546838	0.247018735008447	0.231615942213738
28	0.144381188745551	0.093827689977806	0.202839647131674	0.223427300116145	0.252238250129882	0.272469059582449	0.144381188745551	0.223504978241819	0.260302204946603	0.292102238384405	0.283100221615273	0.243413043322513	0.214287224260981
29	0.149120088298488	0.121312383759615	0.214304747009104	0.222347444334835	0.262776646373006	0.228622557007865	0.149120088298488	0.185536776098895	0.246747046939679	0.26479654683913	0.238281582414795	0.247688896317044	0.219597051118473
30	0.131128927239278	0.110509299230161	0.185533811195426	0.284496921149045	0.238194807662183	0.232874298988832	0.131128927239278	0.194542235277328	0.279124349911739	0.276521339122429	0.282859129851229	0.244017038728774	0.214901317473228
31	0.15311975192221	0.102290892065327	0.168908551109547	0.22213209358248	0.246368940601233	0.251691493851315	0.15311975192221	0.234008499790742	0.254644731751186	0.273149967797527	0.229065588811796	0.225795753276671	0.239247798513556
32	0.140905170979867	0.102154197175089	0.186338037217073	0.268709687374622	0.266701731782234	0.259387600216135	0.140905170979867	0.259613998059834	0.245170181383585	0.290428530158093	0.249478239080952	0.248889759037036	0.258904145848931
33	0.153522558141062	0.122773198184004	0.207847797574802	0.250721492081555	0.270180489596166	0.232501698714744	0.153522558141062	0.208062746634283	0.256838239772118	0.288954315658557	0.256117895632158	0.220438551663673	0.229708259995951
34	0.166296319511106	0.131224193454992	0.183099326934601	0.238264011061504	0.231028250120705	0.276831031097584	0.166296319511106	0.189225786497559	0.265072690285659	0.287898442863265	0.241792587462698	0.22185366001626	0.228197793563754
35	0.154559521541838	0.107875054194556	0.202851094290193	0.235465895402161	0.246358859646769	0.254923221091015	0.154559521541838	0.201479641697852	0.27533010969299	0.280547924537847	0.27147522666749	0.20486524792911	0.256388127318284
36	0.150958314844171	0.0918870815602724	0.164110549799633	0.206034599029463	0.234438467958827	0.283938672927523	0.150958314844171	0.217924343195678	0.268574820669394	0.262351531482971	0.225459646636	0.251241689348757	0.243131315293251
37	0.159270172198693	0.112106171088698	0.187621803080407	0.286838668522198	0.231807923825076	0.243866052237886	0.159270172198693	0.211620259020045	0.254335579460748	0.251143318590573	0.256829657262977	0.221078929142914	0.254234898403115
38	0.147174788119087	0.100410077446839	0.154296011006363	0.237984849732911	0.263479279268004	0.254970050391881	0.147174788119087	0.229119450261817	0.258621837653183	0.263843555893359	0.255211941140774	0.257579691547026	0.269743062770941
39	0.178185438382438	0.10831485824758	0.174041027791645	0.246128518543971	0.2237129314302	0.257009078831592	0.178185438382438	0.210838517020738	0.28362294087139	0.230070278699205	0.237205851449023	0.209084330534893	0.258150695326469
40	0.149313866066213	0.116396944082877	0.176085173816202	0.218270459261546	0.236926477664128	0.286961646936697	0.149313866066213	0.220754519605775	0.2704723863383	0.272349891005132	0.25104577163956	0.215921080529193	0.279453331157155
41	0.145040129380454	0.123090039251547	0.164101164927828	0.236254085283687	0.249262194333527	0.223330547706893	0.145040129380454	0.216279639374854	0.294307705509487	0.255458732295133	0.251839951774594	0.246648834226681	0.280343185986495
42	0.176591281382674	0.106809821961366	0.188048131966796	0.213558437915245	0.236422206074164	0.231964763859186	0.176591281382674	0.195335454981852	0.244982168726735	0.270600578346102	0.254668849944779	0.237206086085314	0.263701232210698
43	0.15070355432524	0.143310255870573	0.193629300870854	0.20978043561621	0.247509993851558	0.242630382000772	0.15070355432524	0.21886295270775	0.250174717536266	0.242291731712336	0.24896764739792	0.225205204645242	0.297550992992363
44	0.168191479881663	0.125490380495552	0.178554379394841	0.224458882202756	0.2229301660195	0.272895732118762	0.168191479881663	0.220183910063983	0.239715262225447	0.280497283872936	0.28841594813688	0.218998200111578	0.271051197064169
45	0.188247277836321	0.124994641356723	0.209794069287463	0.208595169356353	0.246587651959651	0.227053373753567	0.188247277836321	0.193383329359405	0.256971044154161	0.258057066838073	0.219511239573213	0.228484905680715	0.27571140765686
46	0.152852731514899	0.0994703646758779	0.179907186890385	0.220186152044969	0.279086576505582	0.270522234438634	0.152852731514899	0.213701402477466	0.257021852635774	0.257394392835966	0.233126207401742	0.21273763353439	0.311722100050754
47	0.150761643455006	0.11118858327606	0.161083671153504	0.259273785535783	0.241493966246018	0.234690226728069	0.150761643455006	0.239378145448757	0.306469097690797	0.26705556569346	0.234175226768971	0.214313465382614	0.267592542418656
48	0.160856903353467	0.133029616063481	0.188083343555202	0.218144381026324	0.270860923219455	0.239562917227711	0.160856903353467	0.198621810500493	0.268177749463013	0.246079622747371	0.213483295286752	0.238018957060771	0.293493147582588
