# Supplementary material for: Two central pattern generators from the crab, Cancer borealis, respond robustly and differentially to extreme extracellular pH
Source: eLife journal article supplement (doi:10.7554/elife.41877), 2018-12-28
Supplement: supp [file elife-41877-supp-v1.zip › elife_poa_e41877_Figure_7_source_data_1.csv]

pH	state1	state2	state3	state4
7.8	0.907638888888889	0.0923611111111111	0	0
5.5	0.630833333333333	0.0666666666666667	0.133333333333333	0.169166666666667
6.1	0.940277777777778	0.0597222222222222	0	0
6.7	1	0	0	0
7.2	1	0	0	0
7.8	1	0	0	0
7.8	0.907638888888889	0.0923611111111111	0	0
8.3	0.933333333333333	0.0666666666666667	0	0
8.8	0.716527777777778	0.220277777777778	0	0.0631944444444444
9.3	0.365138888888889	0.152777777777778	0.336944444444444	0.145138888888889
9.8	0.235138888888889	0.164861111111111	0.348888888888889	0.251111111111111
10.4	0.272727272727273	0.146022727272727	0.399431818181818	0.181818181818182
7.8	0.933333333333333	0.0666666666666667	0	0
