# Supplementary material for: Two central pattern generators from the crab, Cancer borealis, respond robustly and differentially to extreme extracellular pH
Source: eLife journal article supplement (doi:10.7554/elife.41877), 2018-12-28
Supplement: supp [file elife-41877-supp-v1.zip › elife_poa_e41877_Figure_7_source_data_2.csv]

prep	bin	pH78_1	pH55	pH61	pH67	pH72	pH78_2	pH78_3	pH83	pH88	pH93	pH98	pH104	pH78_4
1	1	0.124204778903073	0.21897003308477	0.284827861216372	0.327939400847341	0.359036510648294	0.359994378077916	0.124204778903073	0.134570665747998	0	0.335063377237804	0.186188881172394	0.156380479962969	0.287188059664349
1	2	0.110776443167807	0.225974338872051	0.285530358329016	0.865746681823724	0.337166162076162	0.353680779268123	0.110776443167807	0.321337016701905	0.294820936429922	0.250102295568671	0.123876440683005	0.110358466370465	0.183880869450684
1	3	0.122297979025897	0.225576890640061	0.286854160401482	0.362792202237528	0.33445752827427	0.328953506861275	0.122297979025897	0.244459483234412	0.244626305442127	0.315631983125775	0.112804685455415	0.144051784207495	0.180157457617958
1	4	0.115913134696858	0.219202281441919	0.285997036968457	0.329359898499404	0.339200765931766	0.363315670583768	0.115913134696858	0.147462175951868	0.256081152054083	0	0.0905173155098704	0.113680027101318	0.276257958846409
1	5	0.129983570076742	0.224799637603483	0.286376530835115	0.324819947030747	0.319243031535923	0.344375273888424	0.129983570076742	0.308447993520619	0.402532735974753	0.0916925621744341	0.159546491305847	0.179468474108616	0.240827906269935
1	6	0.108611870100276	0.230307806191858	0.285653979691939	0.327111064236041	0.327806417828125	0.34437862299879	0.108611870100276	0.142026260501252	0.269689998545908	0.241232069557933	0.114801204494238	0.136917467519754	0.37251713177126
1	7	0.120441006790464	0.225763026710863	0.291102476972664	0.31773034656016	0.325290469379058	0.352274863335192	0.120441006790464	0.309879731090651	0.691297151012966	0.139457954821201	0.0964322944039376	0.157942536609984	0.182292805996704
1	8	0.120975010192145	0.212214509386077	0.287720023236302	0.330787240160884	0.339739290233806	0.337269641514218	0.120975010192145	0.136953902161555	0.125403516419839	0.267231315704049	0.143579553122999	0.247141489518389	0.145620032819187
1	9	0.116455377792891	0.215764897005448	0.285559122067209	0.318207751659825	0.336986635449303	0.346305105021504	0.116455377792891	0.140239472923965	0.119035715476071	0.156948216810295	0.138788556957988	0.199822956860222	0.284972391588825
1	10	0.117806582796233	0.215830084060132	0.287253564086484	0.330389550905804	0.328830213059915	0.330398222981564	0.117806582796233	0.142729705619982	0.160561580182847	0.243437924359024	0.0981901589895054	0.147708360786352	0.336963020792118
1	11	0.127931016159433	0.213414700222976	0.287622390052241	0.321907325074358	0.331480641447843	0.318572355593617	0.127931016159433	0.138962421956957	0.28462281962695	0.392450684563063	0.130012806261417	0.170639982436404	0.151667290723573
1	12	0.106276702021383	0.217723069091744	0.281086570727823	0.338102723172017	0.324003576906698	0.341631560807884	0.106276702021383	0.170655994223391	0.114780780187919	0.0815611455752263	0.114025475571752	0.131756471877899	0.301482800863439
1	13	0.114290155274605	0.21215596975741	0.284674581757204	0.321057414511629	0.334408445475261	0.353936792801593	0.114290155274605	0.275523989372208	0.25634800094608	0.24454201698253	0.0959864236802349	0.158748569416351	0.286712797247716
1	14	0.119553586906491	0.176761864002302	0.288670808971212	0.324806789681483	0.329256461251615	0.32694971132051	0.119553586906491	0.135963224666992	0.26593917059397	0.0927869296619402	0.106039141167788	0.188560772194074	0.11867168410547
1	15	0.123948145054035	0.199906760608528	0.288171869002489	0.325510604968183	0.320060676327774	0.331133649513613	0.123948145054035	0.275600594313176	0.15684724489972	0.100945353233027	0.285697359495047	0.176598245814118	0.186475114986638
1	16	0.116412809134215	0.208347258475811	0.283304372290164	0.315614882043185	0.349402618326692	0.350114005679913	0.116412809134215	0.336254080209391	0.113853072609797	0.0959890034997592	0.137692089227655	0.173504814402159	0.171399488306457
1	17	0.115556751900682	0.138000891485759	0.28885294271127	0.320663922942815	0.335947809567849	0.342875357772711	0.115556751900682	0.287793069683998	0.28579439103191	0.262419377229471	0.102910515190621	0.142685512569167	0.275665484683558
1	18	0.120123871736535	0.204544163474558	0.281870828687331	0.540630452803431	0.335526390458126	0.338702305747067	0.120123871736535	0.266567108030407	0.107159543414618	0.097900331588423	0.128578169741185	0.149701673335806	0.307363376805625
1	19	0.125013751512666	0.130507412821048	0.284542455742651	0.311105852493085	0.338809716310273	0.33269967994585	0.125013751512666	0.34067277222215	0.0870965578569368	0.0957022969508293	0.204344361117355	0.163159818305226	0.362938154437292
1	20	0.16818057211667	0.128184669962296	0.287741215142031	0.341234097777061	0.338298165576814	0.325161315113296	0.16818057211667	0.289704606321418	0.283742165047934	0.297075456801362	0.114674002792152	0.164161274031351	0.173698678475803
1	21	0.116140233061112	0.201686804246625	0.282475249165724	0.315621507247021	0.343227249779076	0.314405231486035	0.116140233061112	0.134868314577647	0.21534751071882	0.255270797744621	0.176869689487574	0.185032784275715	0.314134389739044
1	22	0.135170754455566	0.136254818311012	0.281646689208499	0.320863915192581	0.330006379552369	0.365120837401196	0.135170754455566	0.243483504677398	0.340653527245426	0.102768691312654	0.111505344451159	0.175563210529341	0.293335684406977
1	23	0.126903231210073	0.142432287690432	0.282703705400768	0.894844968429687	0.328534997563045	0.328307075986262	0.126903231210073	0.278716856185781	0.337845892047151	0.124642276665968	0.138037466129057	0.206799142197158	0.366509914792883
1	24	0.127812677739505	0.155491597636872	0.293399546825073	0.672327224261792	0.331823579690325	0.335404818460823	0.127812677739505	0.284146110345134	0.326859071088855	0.117520827628677	0.132510895285472	0.100938118876841	0.195296292180305
1	25	0.118990107162491	0.172541098686537	0.288947506436901	0.65935716359697	0.340417323908189	0.322625976641341	0.118990107162491	0.243727339236405	0.305312923846465	0.124641764535665	0.102116048762456	0.165928637590845	0.240802226202795
1	26	0.133040149022868	0.131073452251907	0.290087358166673	0.305761289752356	0.332845860727361	0.33588799003548	0.133040149022868	0.133181506416019	0.251840704710138	0.086605430853358	0.115587293257678	0.154995645635602	0.312324780559513
1	27	0.112752664627347	0.131677705647657	0.293830635102417	0.316274770249862	0.330759110787699	0.315635859013845	0.112752664627347	0.25555472042623	0.38740340231083	0.107334602743902	0.116825978359155	0.172654318429812	0.307795770165101
1	28	0.138378643167535	0.13673474089882	0.296489438355863	0.324340184014553	0.326598156335374	0.335185059074286	0.138378643167535	0.301002499633295	0.276142153323512	0.13187375461723	0.16486564535331	0.226153103690456	0.239421123586233
1	29	0.153330491608222	0.142256616710885	0.288477555410122	0.306196228934242	0.327850139391763	0.342222007856777	0.153330491608222	0.258457978383108	0.224741053192081	0.12186086413976	0.19899230297772	0.146681980265406	0.405509228492313
1	30	0.15940952170323	0.155931032248607	0.28891144235558	0.325354049731897	0.319644427632701	0.331879592207998	0.15940952170323	0.254055121869541	0.338639447961375	0.0999410347894742	0.232780355312069	0.178321174468231	0.299605778503951
1	31	0.158312264609452	0.135057385883261	0.296802996349352	0.319183982147494	0.335149737289508	0.344056644495877	0.158312264609452	0.248315076726593	0.353194982281024	0.11132497876476	0.124313787890843	0.345121077368169	0.274652017896394
1	32	0.114891685863153	0.138697794150282	0.287761374239852	0.332668869087682	0.334366603963509	0.344897329402448	0.114891685863153	0.280692175624892	0.294343374270896	0.127488332913347	0.107665689421093	0.216699133202627	0.20867957605976
1	33	0.155950131616915	0.129589935731631	0.285252665510901	0.322877364355506	0.352652950227746	0.326711390237616	0.155950131616915	0.264915095884241	0.322467690332532	0	0.170178477955691	0.187947667851364	0.362429552415166
1	34	0.155530052234559	0.137183808469454	0.280022663065849	0.308508318324107	0.330357953334529	0.327432726586903	0.155530052234559	0.281917166227026	0.669248021550575	0.0998504780696237	0.145731806841234	0.173386150901984	0.315984094417506
1	35	0.161005446814266	0.142267343100461	0.289215084976778	0.318536584374954	0.323160879052155	0.326833308250626	0.161005446814266	0.171745360836663	0.164796653714395	0.101811014322774	0.204914253630568	0.180960164253093	0.406027884341864
1	36	0.162775960276857	0.130459020787119	0.287288802876881	0.312260997473586	0.337560339359321	0.33374987630422	0.162775960276857	0.291543608530322	0.350783650675612	0.1225757579472	0.12311275966273	0.173519267718814	0.277912881733644
1	37	0.162278651918783	0.137804064668691	0.285984151240634	0.305659562927971	0.317978598168081	0.345020826191116	0.162278651918783	0.259845736426624	0.132397170102238	0.128779352033812	0.119954992886669	0.269853575882994	0.417842019580935
1	38	0.165055636842262	0.130322365403061	0.282533755440459	0.323761957408302	0.332420471355524	0.333317055103258	0.165055636842262	0.160989727871969	0.250067270184785	0.1005992698505	0.146833653959778	0.168030231999342	0.394652572400771
1	39	0.169332774549567	0.127327427826374	0.283334089891017	0.311678831007082	0.323826734490782	0.32804934787581	0.169332774549567	0.255924049761951	0	0.124910376804643	0.150218492797774	0.18842423434845	0.37779319855937
1	40	0.167872551159161	0.138053092458298	0.280608457211441	0.305705812997475	0.328476755370384	0.32801500711454	0.167872551159161	0.270150232765946	0.0634551185119522	0.0910658068840282	0.175192172737873	0.253733301730721	0.22797548413582
1	41	0.165445437086652	0.136103122613942	0.285359659900457	0.308576164436947	0.324842049935121	0.326396419183569	0.165445437086652	0.245584816689785	0.128079274669161	0.128749926163873	0.146229829422904	0.314000294875186	0.12502219143898
1	42	0.166460386658519	0.123625274392106	0.275206959360083	0.307880921894332	0.32899479411237	0.341101427116329	0.166460386658519	0.242169608484598	0.342998903191351	0.10976574891524	0.126097044285282	0.188956050674222	0.344427757087016
1	43	0.166487969579318	0.122470374416429	0.283230092053762	0.3129169080592	0.34075566774411	0.316329487157908	0.166487969579318	0.231357012381846	0.130457527595028	0.114161245910173	0.155460128655994	0.244632478312219	0.152886964551627
1	44	0.165942720280358	0.130176636678309	0.277838672489442	0.305200622531625	0.332024261775022	0.353015878344292	0.165942720280358	0.268487503784197	0.0696658269612323	0.113507249140467	0.131491747577922	0.213050370078623	0.114657860942947
1	45	0.166511197605414	0.124210487091425	0.279572849085572	0.297643993779118	0.67469696499332	0.315752299461188	0.166511197605414	0.269952181589797	0.247487714738599	0.135210780085074	0.155224341274464	0.365719849108469	0.130252938180653
1	46	0.166792038682409	0.136659501828434	0.272896845331458	0.308112593024844	0.316659653930695	0.352307785090776	0.166792038682409	0.253395746196042	0.233281318019032	0.258877891385259	0.127985911310883	0.279916223635147	0.255032389161435
1	47	0.173786914142964	0.138404281674858	0.268547557585838	0.312567110606216	0.338210988416244	0.325206979774327	0.173786914142964	0.238311265637122	0	0.112035528706863	0.133688407316836	0.203525441927106	0.159171923017817
1	48	0.171049438353749	0.138273380300191	0.276164988552149	0.308324668301628	0.331401241614784	0.354172580819894	0.171049438353749	0.237879360672096	0.200069137769554	0.0981809042068556	0.110042839677486	0.201204068555626	0.314186373785366
2	1	0.1250966371522	0.113952711903614	0.143481080584714	0.152391634308843	0.152251726915213	0.193164674816928	0.1250966371522	0.15932624119125	0.191608321932638	0.187419995089596	0.227669427454747	0.197032299504858	0.167292619886074
2	2	0.114622770730388	0.114863180722283	0.140802036560657	0.148186347295451	0.149076091026824	0.154577691853247	0.114622770730388	0.165135708568899	0.198176255323816	0.196741409896249	0.218010960784371	0.196954865260399	0.193566121942727
2	3	0.121063763073373	0.110839554203313	0.141870099298608	0.147170189635895	0.154987337534523	0.152061189422624	0.121063763073373	0.193518255135158	0.198398336409521	0.196301357687453	0.217245691092941	0.205697900522843	0.197865422696085
2	4	0.119020981018534	0.114927865525203	0.136439049947607	0.145574604801342	0.154006155229439	0.157894134789912	0.119020981018534	0.164869316336406	0.208668842102044	0.192057478379614	0.218389868193804	0.197630915068541	0.202759714587375
2	5	0.126183127847675	0.11712715206501	0.138041277102679	0.145504494911563	0.152486908998862	0.156687991902365	0.126183127847675	0.158728213580531	0.19233322825586	0.208170009631166	0.222075503985161	0.178624697007858	0.192328621618229
2	6	0.121653317242655	0.117237280048208	0.134228872435504	0.152224378734254	0.149669718693548	0.154946390050434	0.121653317242655	0.157825542801498	0.187830831346232	0.193987341887292	0.214148475264336	0.195195468706167	0.186863332187456
2	7	0.124973130776883	0.113990641368344	0.139246869382259	0.151329552230891	0.155675944952986	0.15147010775198	0.124973130776883	0.15790886266558	0.185592477414656	0.185637550360039	0.214391141911683	0.203253641094331	0.183482387457339
2	8	0.130064381869025	0.110323731208065	0.136521225900579	0.144742517535556	0.152236263963956	0.153604168202708	0.130064381869025	0.158958957420724	0.187948527244636	0.194890044074146	0.21580172356422	0.196501558555501	0.17685707391907
2	9	0.128872264055805	0.110927833679243	0.141343355519529	0.152148199166769	0.149035738770157	0.151418914455279	0.128872264055805	0.199241289170838	0.184780603274909	0.192840372612119	0.216096731262918	0.193058578864212	0.174787589382004
2	10	0.123501616636162	0.11168030841634	0.156563341943365	0.143957803088758	0.152847534461518	0.147471961893245	0.123501616636162	0.164880590657578	0.188035327392308	0.200171536303523	0.208534977742335	0.191000310673527	0.182926236096523
2	11	0.126708987468481	0.112180817528926	0.147825122879633	0.148320774825239	0.153871009932374	0.15296883970291	0.126708987468481	0.158820046171419	0.193299544013009	0.193466851527284	0.21219733992895	0.19499844404453	0.178982935634953
2	12	0.131315639939826	0.117566145652698	0.144556089931235	0.147627406142186	0.16034460357347	0.154881716832855	0.131315639939826	0.171259562705833	0.188993796159702	0.195064388159447	0.208073961065551	0.199885964787516	0.181300281585064
2	13	0.126043641350381	0.120309291125626	0.140957977040568	0.148350590337182	0.148343522060907	0.149003514437114	0.126043641350381	0.161115412208123	0.177017468083751	0.198061789655445	0.214484003300987	0.195678803656693	0.18163336825495
2	14	0.127660280673893	0.105995081828203	0.142910836499999	0.146677246985416	0.154814568294505	0.155532847759783	0.127660280673893	0.190607257339155	0.179787201220084	0.199153421553329	0.210754409790564	0.19299984652833	0.175340467352481
2	15	0.128882587962366	0.114302676060184	0.141782763077086	0.153152955999029	0.15744213214433	0.150309951860125	0.128882587962366	0.166719739116952	0.179862469456423	0.201718445692211	0.212565974688874	0.189819117127507	0.178486434926317
2	16	0.127753660105369	0.113409030080611	0.140718621858105	0.141170159451695	0.154811924932368	0.148218854031108	0.127753660105369	0.157054225406556	0.192923230750628	0.192935247324543	0.209828619832366	0.192807071907379	0.171406109870039
2	17	0.126672552717949	0.114159421348725	0.142506902426312	0.145795846476552	0.151050865868762	0.151705963017476	0.126672552717949	0.163813959797765	0.179418041813433	0.19675064283028	0.218391635838678	0.196155171955923	0.174875164870661
2	18	0.130865215371428	0.107232051231184	0.144653533090219	0.155353802750383	0.154768335017728	0.152603957631037	0.130865215371428	0.173257977663581	0.171974368940053	0.203577703835025	0.213806591786418	0.192572771503376	0.163295965773165
2	19	0.134434304136361	0.112713140548778	0.142659050575487	0.146161435605364	0.153764745794294	0.150658459349759	0.134434304136361	0.169645405297541	0.179664312476676	0.205871300520153	0.216808403383171	0.193714695266122	0.17757537296417
2	20	0.152845836632256	0.111477749041291	0.143047035808976	0.144508252866321	0.148895271532862	0.153690571698189	0.152845836632256	0.166525359051874	0.18634154763418	0.196998809996476	0.207797354083516	0.195480469561061	0.173266920551004
2	21	0.137790203392119	0.118492397527775	0.145033684073126	0.147628693195932	0.156095136828996	0.153715242924656	0.137790203392119	0.156244384967415	0.188074351597819	0.197193305753168	0.212166758506016	0.197663018942338	0.16681318424683
2	22	0.133036205748701	0.11000011000011	0.139127837768608	0.154064926041132	0.160403704042334	0.157834012282642	0.133036205748701	0.154654713426532	0.187855132573385	0.200859516323836	0.209596754687968	0.192638511906023	0.176616958771959
2	23	0.130793669063243	0.109369463170927	0.142248927087467	0.146103836563559	0.15478355306961	0.154475004141833	0.130793669063243	0.164162238319923	0.185843737326749	0.199975162009077	0.212518247918724	0.199763449538627	0.185213630704413
2	24	0.133613208467336	0.106862699490321	0.137033793903915	0.151285930408472	0.155908706098057	0.155247200116746	0.133613208467336	0.156352117476727	0.18167911471401	0.199979366734139	0.21506915227825	0.19074141186793	0.187914607628244
2	25	0.129186014438007	0.108138737674887	0.140047820279329	0.149202341641591	0.156510999716923	0.160840266700426	0.129186014438007	0.173068378249149	0.174949402982467	0.201266257438968	0.212900712921074	0.189601880567715	0.187850044303516
2	26	0.14662885597234	0.111805547791281	0.161831413743047	0.151307218716098	0.153926906269289	0.161927956388629	0.14662885597234	0.159573110016085	0.184539068883376	0.203281692811345	0.22320646687001	0.194411510388791	0.1880523025162
2	27	0.132296656731187	0.105313153928866	0.149073242252085	0.15403576918409	0.155347849658241	0.155444844283127	0.132296656731187	0.156901630239841	0.182399729580962	0.204473527155799	0.208336678145458	0.192436998707304	0.187195875665767
2	28	0.129802933587319	0.102603354924499	0.142010758735082	0.146464565095444	0.156141166750227	0.160708664199978	0.129802933587319	0.161870209259378	0.182640056750273	0.200343698502276	0.210693826760787	0.194672418423099	0.201458943627696
2	29	0.13077382797226	0.113543722281139	0.14402378032527	0.149012335364917	0.1534686210384	0.161506793783281	0.13077382797226	0.158268667393647	0.181868236527049	0.204756610036361	0.202380921602929	0.194677179156527	0.196253015807938
2	30	0.123551512950052	0.112418159579825	0.140135511039175	0.149895373029626	0.15812997431335	0.153395800167113	0.123551512950052	0.181467498164348	0.197895970046466	0.198910375268471	0.208012469355149	0.185573966650108	0.197449492649151
2	31	0.133231480528007	0.110165523699358	0.140220368771283	0.146120923554858	0.162118959650212	0.155922823179849	0.133231480528007	0.170740902196727	0.180924769304948	0.196406915911957	0.208079825927665	0.183973345680242	0.201457107740393
2	32	0.127950212013501	0.106024075947166	0.142758231796541	0.146958761901822	0.157925858202395	0.156160695602204	0.127950212013501	0.163865656380274	0.179633427224191	0.194343830343365	0.216064644767238	0.199917441322665	0.193408976183323
2	33	0.131132922887284	0.108664234036681	0.139974272728672	0.149687153848457	0.154290986629144	0.156524786844035	0.131132922887284	0.161082990161499	0.186516455549783	0.202519628632395	0.203704554830361	0.201538518739836	0.194701017118114
2	34	0.133587594854216	0.111355102513507	0.13700310360651	0.147715360630212	0.154888578573108	0.154598931721382	0.133587594854216	0.162293019014107	0.175574640682256	0.196240667364797	0.209450775725457	0.190673784544117	0.202054759085294
2	35	0.130469612322594	0.111282781666354	0.138456404924064	0.147262825855818	0.154226252647259	0.151155509821576	0.130469612322594	0.165360046697677	0.180832480406802	0.200884624414104	0.203735488645514	0.194392706617102	0.208635079825736
2	36	0.125705364225008	0.106703998839061	0.135292000725165	0.144905378353935	0.154564283285419	0.157572128641885	0.125705364225008	0.163790091126217	0.179699659259794	0.20120411603556	0.204720604779244	0.191544828193864	0.205452726637456
2	37	0.129687220361931	0.105832424938352	0.137978316139031	0.158683057568626	0.151701948950152	0.152477712311612	0.129687220361931	0.168261241548394	0.20133761273839	0.197446491319063	0.212506753024888	0.192233905949132	0.203021005051198
2	38	0.132347901716136	0.110087905192296	0.135279738206651	0.145311849594168	0.156571951074398	0.149486439337655	0.132347901716136	0.168755579481345	0.180538395659073	0.203483467230011	0.215592731662759	0.193060831566211	0.20710471768317
2	39	0.135265648206513	0.112595748609724	0.133685890214018	0.149391528305214	0.154812241142479	0.154811200991815	0.135265648206513	0.171161424948707	0.181212487340506	0.202229677966808	0.209006226835078	0.184221926477304	0.217690131664791
2	40	0.13629994711562	0.106954960196711	0.138521038575339	0.143131696080827	0.158798971617859	0.156338917759477	0.13629994711562	0.168174739101481	0.179392906410346	0.209791831112961	0.207626649407387	0.19426477302751	0.228232509754342
2	41	0.131993583847821	0.106836008863115	0.13574083274286	0.154892272424529	0.152700430121342	0.153342733569747	0.131993583847821	0.180096459663797	0.186546978125502	0.201288815449877	0.214037313234501	0.186261674707516	0.229386270850507
2	42	0.139292838119435	0.111329812342469	0.1403923244402	0.144067538990117	0.152021428940623	0.157505592802322	0.139292838119435	0.176398431601939	0.18169740131371	0.195353357364432	0.210141192980082	0.18706117369381	0.232250279209246
2	43	0.136904908588593	0.112554687508793	0.141075759093391	0.146356741630591	0.150105049176559	0.153765958984468	0.136904908588593	0.171979953152991	0.184980913401624	0.201231329618412	0.212397983437454	0.191580983294506	0.221168072517481
2	44	0.133534526871152	0.10450303581319	0.138394976979404	0.148409907082907	0.150271089044637	0.159622524318921	0.133534526871152	0.170928144502267	0.186223351276394	0.19945737731678	0.213684961893908	0.185817488319193	0.224647400024209
2	45	0.140498770635757	0.10717286554521	0.14372606960941	0.147825559926265	0.154008077372502	0.156022548378691	0.140498770635757	0.174040471371213	0.178804944557167	0.203096891750995	0.216958668010991	0.188413172230902	0.228361072387484
2	46	0.137151812600737	0.106845939907707	0.134628821607388	0.144753839193148	0.163157954847668	0.151896801599929	0.137151812600737	0.171761754311206	0.181220280770638	0.205066669222783	0.207917304321356	0.183111950984593	0.227179568065387
2	47	0.138922654811934	0.111982619875296	0.137914670278038	0.145802775501634	0.155480315029882	0.154215797249407	0.138922654811934	0.18240421816093	0.205553363626914	0.201592195709814	0.202199122264275	0.183212638265698	0.228979227246132
2	48	0.139943714637972	0.103704963526964	0.139389141028358	0.157392468451211	0.148465754888978	0.157873828305266	0.139943714637972	0.177271589012384	0.177955891852645	0.206370533433011	0.198221714393076	0.191160099693473	0.236042779644127
3	1	0.291524125559129	0.279700544344351	0.310806162668581	0.310272733140761	0.312014777229177	0	0.279075552307039	0.287819297235067	0.2831806376724	0.200275787148604	0.206523889814382	0	0
3	2	0.283068709135793	0.285951618343629	0.289418064352218	0.31045999374661	0.311052396583568	0	0.282282367385359	0.279761333839249	0.292016189434738	0.234515426307115	2.03767290302247	0	0
3	3	0.282378338285099	0.279979594000955	0.301590244131957	0.309357893460671	0.315959979258676	0	0.280322741881097	0.288873022928843	0.2915593707929	0.248490208907567	0.210103568425416	0	0
3	4	0.275033148750748	0.275035938584877	0.298873985201983	0.313104848162659	0.31616482472845	0	0.277038594288855	0.278393570764956	0.298018478443016	0.24834675166819	1.18168716706522	0	0
3	5	0.287632651994998	0.274731965191335	0.292391783697623	0.315104001992837	0.314745795605742	0.0208079259887042	0.285731350417449	0.283779735127215	0.292810670629332	0.231202428321459	0.171228469154817	0	0.0208079259887042
3	6	0.288770453584171	0.288057654030169	0.304510111770018	0.308893842410936	0.307482482137081	0	0.283665283088011	0.27750137851346	0.299563450782087	0.199977951401375	0.213729559439259	0	0
3	7	0.29101597273965	0.285457102865111	0.299114806383192	0.299926788548179	0.32238365780575	0	0.280883844401274	0.279416439852711	0.290164309893621	0.198701134319378	0.111745827410805	0	0
3	8	0.28281138462444	0.286211990989448	0.299173865126021	0.315472049403235	0.300978963617365	0	0.281259992667409	0.278790082287712	0.297561749362566	0.2372430653329	0.130380325147119	0	0
3	9	0.310110455869186	0.278087126876737	0.299973736451524	0.303981609878195	0.313267477997148	0	0.278508662698506	0.275580000768847	0.296021154119237	0.189414622971595	0.168298885356482	0	0
3	10	0.310924242830675	0.281690050559873	0.291210227138346	0.314192220078639	0.314069162046123	0	0.276215428666225	0.273762848866381	0.293450029487529	0.240366649975635	0.096668793380121	0	0
3	11	0.304168019522164	0.273087402045644	0.293918655534944	0.306999327239153	0.306784698827783	0	0.278155765368584	0.279485565255058	0.294206066497336	0.186184474171101	0.150962521321898	0	0
3	12	0.320943297699035	0.28246281309033	0.297413618367219	0.305700104668055	0.315683503658387	0	0.279117308871476	0.278045055384106	0.294353449423756	0.188814624908787	0.10165194577072	0	0
3	13	0.313869513362839	0.280761118134429	0.298273250461486	0.315742881027655	0.302866692978701	0	0.27869566490178	0.279316384269451	0.299896655458445	0.202829296129386	0.0975526955273063	0	0
3	14	0.248776584399512	0.278229271161353	0.299272524550358	0.298509558101721	0.315569312233107	0	0.281449848457194	0.277255460647149	0.298914132805124	0.197734805119124	0.202451721448083	0	0
3	15	0.282208138876961	0.282567183637745	0.302429942861607	0.309985735576583	0.301366104016952	0	0.277963333139684	0.269745816371316	0.300493242839283	0.195288066427147	0.197829637413282	0	0
3	16	0.301761112275576	0.282262779343526	0.299178845367158	0.304218146544402	0.302946540939554	0	0.273549512211986	0.27047019635063	0.306234803630903	0.190487490974303	0.13536745495648	0	0
3	17	0.203695769520144	0.280740071354214	0.288291370663095	0.303709562420942	0.321834283249003	0	0.273819587218091	0.272446528559861	0.297047869136656	0.193592892983182	0.176090630668326	0	0
3	18	0.329533291885422	0.279606905773955	0.298402641169029	0.311896389873628	0.301794737883707	0	0.272320608130268	0.271691888175454	0.290362389756747	0.196798116874926	0.137529637636911	0	0
3	19	0.305579892608483	0.276235772801967	0.298369412082735	0.298851730828627	0.314291695740134	0	0.284790263180229	0.271581776892053	0.295098665134021	0.20466500856357	0.188931986374225	0	0
3	20	0.354898545366191	0.28379026126627	0.296014548144336	0.307745284764463	0.313158010037061	0	0.277883255598546	0.269921321816898	0.301793646258779	0.204540845192511	0.130151933826727	0	0
3	21	0.402426645579785	0.270744676759467	0.291897675143706	0.302270560678937	0.315567470839087	0	0.276706338009794	0.270270260965491	0.290529765561851	0.197257569003839	0.133740081501206	0	0
3	22	0.346588408001509	0.279835725223566	0.294762531534978	0.292640060038084	0.318553205304648	0	0.272858613487818	0.286696782533429	0.284757583136293	0.192477986075856	0.0887732863426736	0	0
3	23	0.319188361648644	0.275456044998569	0.293485123626498	0.305191143187757	0.306157967368729	0.00556401254551293	0.280221072218318	0.278778594835794	0.29701317473359	0.201668271618037	0.883813428193897	0	0.00556401254551293
3	24	0.294738814207509	0.280530139998769	0.294163626270332	0.30516379844322	0.319751899637965	0.1123688935934	0.275361643088494	0.272835980457989	0.290298686265631	0.198229830525476	0.154931628672267	0	0.1123688935934
3	25	0.284172537294244	0.280560697712016	0.287327758375148	0.306578772726113	0.321621568465321	0	0.277866382859324	0.267450987112018	0.300249784292502	0.19351520794106	0.136481134212818	0	0
3	26	0.290108986514811	0.276655372639591	0.293391333206147	0.296857550920171	0.323825786151191	0	0.273946900436651	0.275535944581534	0.299875533547457	0.18967234103087	0.153631677683995	0	0
3	27	0.328609535969123	0.279272541649626	0.294797060329963	0.301186663987258	0.320997016360931	0.0365167144305291	0.276897373883153	0.272079448939241	0.297234505346372	0.192846573872324	0.15203807033281	0	0.0365167144305291
3	28	0.29181383130695	0.285281095622948	0.294090554958895	0.30048573965209	0.30998433584243	0.165009709774998	0.277381555934286	0.277524787526675	0.290309153783838	0.20164574725138	0.102849020723049	0	0.165009709774998
3	29	0.21662045038125	0.278906513312501	0.293372478330085	0.310913076291164	0.312710658207048	0.15269701294626	0.278501930635158	0.271957506869491	0.292616908451942	0.235476973137965	1.69094400153302	0	0.15269701294626
3	30	0.233674237093611	0.284860130879019	0.292514645988863	0.304739322567652	0.315746906347995	0.169561361713384	0.272826956500892	0.276836360813876	0.295441919333658	0.204235038845943	0.150185105412445	0	0.169561361713384
3	31	0.269957349788866	0.282491642623146	0.294152083447947	0.302333811541597	0.31086997567205	0.109378195894161	0.272426180448372	0.274798805919206	0.287141020404475	0.203883595277008	0.178169736555916	0	0.109378195894161
3	32	0.278088900596345	0.279264665278536	0.2883651692227	0.305041553479527	0.317120829247146	0.145761729593066	0.271455931783951	0.278888591782862	0.292319281339469	0.201195986907448	1.66384860039199	0	0.145761729593066
3	33	0.298018136888556	0.288817333303464	0.291069653410167	0.307622332755566	0.308072400568699	1.72850411919696	0.281216255255108	0.281019727906511	0.306881982424977	0.201406883539119	0.131969124503631	0	1.72850411919696
3	34	0.299336771438838	0.292273272983743	0.293196412660131	0.309599920780477	0.317808637164822	0.158800347471643	0.272984782849195	0.28199245606603	0.303994284039562	0.192572745639044	1.07433839518124	0	0.158800347471643
3	35	0.292564380266826	0.281101544068549	0.29518656386275	0.30714776632411	0.315600524342262	0.144092634272721	0.277215668773585	0.274004342139101	0.297844422670239	0.189372034968307	0.143255598070633	0	0.144092634272721
3	36	0.308618322091632	0.287325412582131	0.289013916641908	0.293844006956281	0.307706847476644	1.18244493126745	0.272707124547412	0.276951838955444	0.29981629993921	0.765563645591443	0.142269172106558	0	1.18244493126745
3	37	0.343907731051439	0.279674492332371	0.294642389524138	0.301503572671416	0.315097297086326	0.214857919628962	0.279222614815401	0.268802714177474	0.301906317062489	0.212525472142034	0.209422627015962	0	0.214857919628962
3	38	0.868217320212101	0.271154318219309	0.288881319746836	0.302520664226147	0.314246730424231	0.206547461699766	0.28309314600351	0.270467045611807	0.298061782284491	0.19699550791412	0.202597297352053	0	0.206547461699766
3	39	0.503627888706039	0.27437181290143	0.29568073127568	0.298977770543907	0.314184296830386	0.202774340717556	0.285356266210422	0.271273327480681	0.295466258285338	0.203184450085274	0.150738392013277	0	0.202774340717556
3	40	0.321650308582007	0.272238626030956	0.287652258640164	0.305359944992135	0.317136045192313	0.210634074290854	0.282335089262627	0.277268488645746	0.303831150251439	0.208939127163942	0.0555610499260482	0	0.210634074290854
3	41	1.2004487502786	0.279916510940116	0.288858677243395	0.307394576214318	0.312045467399015	0.209725776521773	0.287233461513898	0.271761421789268	0.295283200416347	1.19053833150607	0.158658384698986	0	0.209725776521773
3	42	0.211104773779241	0.278912906310424	0.292108364715197	0.309056043904489	0.316951046036802	0.217496922218541	0.284010656932115	0.278515396139451	0.297758665890869	0.204913470225571	0.0853436018755107	0	0.217496922218541
3	43	0.242099314479176	0.274381840616309	0.290100021056687	0.305817230362198	0.317146693047745	0.213383174709013	0.277830790226282	0.275652381506535	0.293785686325193	0.191379070241894	0.111479488888839	0	0.213383174709013
3	44	0.30768046914778	0.273151940797327	0.302089960473629	0.305183798042125	0.308860854617929	0.210089681107465	0.282074376747472	0.275151737100965	0.297556884660074	0.196253698159883	0.149352036190986	0	0.210089681107465
3	45	0.305736124085455	0.278163698784054	0.29370455998087	0.307036049417143	0.304601928992653	0.205203254410258	0.279205317737027	0.277426121092445	0.29468161514604	0.194454865527862	0.0948351811968386	0	0.205203254410258
3	46	0.293339535982425	0.282195994676112	0.294273836446729	0.294505195670103	0.312306563320374	0.209626501347235	0.280596837598466	0.276046398997018	0.295548142157293	0.195912935288721	0.146140288831667	0	0.209626501347235
3	47	0.30575878643993	0.281667185042731	0.288367510088461	0.3099169365881	0.320453396604925	0.2087800454042	0.287606579076817	0.273364579929261	0.295488971123189	0.195679207742894	0.085287919222106	0	0.2087800454042
3	48	0.316524763174107	0.255737600994716	0.286071259149857	0.300502614269578	0.308145632098037	0.205216121702814	0.285633560989445	0.276716993091865	0.2983164981121	0.194947017097814	0.0949540469889597	0	0.205216121702814
4	1	0.15127494523847	0.187041397872591	0.208624368273128	0.24990436574877	0.275894944425052	0	0.215581931791524	0.231335916273823	0.232620532764358	0.118632968576499	0	0	0
4	2	0.154287028777399	0.182832836457171	0.208585792923048	0.239500396029156	0.289844688088312	0	0.214412857397287	0.238277693917447	0.250469070853138	0.117669069861303	0	0	0
4	3	0.140009156598842	0.187810257333559	0.209528195091517	0.228996880172363	0.28530585899227	0.0472037668605955	0.214642440397285	0.233774260090304	0.244497284709345	0.116315046281757	0	0	0.0472037668605955
4	4	0.148579579222632	0.176710298409387	0.211226525776002	0.242092526470507	0.278484586745229	0.11848285129257	0.214436910759655	0.243973201950107	0.242055255000511	0.128978170444652	0	0	0.11848285129257
4	5	0.158770053148876	0.1818224108384	0.205986048812665	0.252391205133013	0.273968582869878	0.125695883836892	0.218693607955866	0.22907294909843	0.243505918495873	0.114452487910956	0	0	0.125695883836892
4	6	0.159612241709838	0.174390418292857	0.202898992042667	0.22612937984581	0.285131489248213	0.120255615335958	0.20358182349353	0.231949215807534	0.256030140596259	0.114460610097944	0	0	0.120255615335958
4	7	0.159297053960284	0.17302372228668	0.205705639298598	0.230130940707925	0.277233857329896	0.115420928584455	0.222352093679668	0.239200288307978	0.246079127927019	0.108892226265302	0	0	0.115420928584455
4	8	0.164021179231942	0.169532441417393	0.212147811669869	0.225763363994565	0.276740578314111	0.126306551693632	0.219080547388869	0.235202994602154	0.244822273934737	0	0	0	0.126306551693632
4	9	0.161769101023115	0.173647930083628	0.20673141641676	0.244949358242533	0.277837705132745	0.126939315390885	0.217208290354296	0.238471421948028	0.241747488595903	0.0565794550945839	0	0	0.126939315390885
4	10	0.155070735516005	0.183207896993192	0.211350617557887	0.23660164840454	0.281751354660099	0.125280157752775	0.223241463262896	0.229926247994578	0.235927341052672	0.104182294010768	0	0	0.125280157752775
4	11	0.152572233913132	0.177168305950526	0.211300985974704	0.22864267607735	0.284967584721812	0.129686211243275	0.219486246684612	0.232799841487099	0.247497443373543	0.0952887343940876	0	0	0.129686211243275
4	12	0.158547954414292	0.170433991877438	0.204132177587399	0.244196788034125	0.27603269480564	0.127484747537545	0.211952383758841	0.237209074417324	0.244851014295395	0.083353060224253	0	0	0.127484747537545
4	13	0.178453922746456	0.177488432191432	0.202312008318132	0.215873742479928	0.275666221562539	0.136240524471523	0.221623668381025	0.240869925919744	0.244851702617123	0	0	0	0.136240524471523
4	14	0.145892115698284	0.166729694210632	0.208505219651809	0.247706582997499	0.278352938753466	0.122190235533898	0.218797650603041	0.235557611690887	0.242857390138618	0.0804634048411612	0	0	0.122190235533898
4	15	0.126683435362939	0.165235384538085	0.206529286498069	0.231186306475822	0.278553720999079	0.160594337121574	0.220593059813186	0.235668640860896	0.244669510937068	0.095582373845604	0	0	0.160594337121574
4	16	0.128740225398386	0.169557911656937	0.210311235994198	0.229362132990346	0.262942366555141	0.169763438698995	0.213845048326627	0.245247953118998	0.246580249149652	0.0802983888128284	0	0	0.169763438698995
4	17	0.123392808667111	0.166362277245632	0.20537191310602	0.203358677452542	0.26820158511912	0.13127890597411	0.213540273666489	0.233455727515045	0.236342810379806	0.0680838547989246	0	0	0.13127890597411
4	18	0.123192762178837	0.165792601944524	0.203365475639763	0.234216581029922	0.275431794007659	0.214268158438613	0.21958754585279	0.228078364727624	0.241633818325749	0	0	0	0.214268158438613
4	19	0.106544949716111	0.164519955447996	0.205827041858642	0.231968437532773	0.268817932454004	0.224769015856951	0.216219112660476	0.245522166931967	0.233014011300828	0.0979022705531472	0	0	0.224769015856951
4	20	0.112728133560293	0.161890964349635	0.208557969028818	0.230215436695709	0.264720122828241	0.226466774689694	0.221694095094272	0.253285205979902	0.242668245257972	0.110525204720311	0	0	0.226466774689694
4	21	0.109099811536866	0.158799209922634	0.209638511737275	0.220130444633451	0.271179253463141	0.22806387880972	0.220273575271602	0.237770001453215	0.246163673052775	0	0	0	0.22806387880972
4	22	0.100765211012428	0.160164777523116	0.205628769809907	0.208263304808476	0.263592385175428	0.240181142949555	0.220553912089291	0.24452037211612	0.234839668921557	0.0801770951678067	0	0	0.240181142949555
4	23	0	0.164763099931608	0.20870067938545	0.209143183804823	0.275390959458125	0.238219920055122	0.219405395145179	0.241155325547529	0.237412392607647	0.0566592461940568	0	0	0.238219920055122
4	24	0.0825751557780313	0.150702726815139	0.216678347848603	0.22371297154432	0.264395106686753	0.239272720931042	0.213140988767882	0.24232205938182	0.241815962287803	0	0	0	0.239272720931042
4	25	0.106861582192586	0.162315143698441	0.209922853194794	0.237327817155682	0.274710182178838	0.248588541345739	0.217831504932182	0.240841065085711	0.237827001152918	0.0761565901343706	0	0	0.248588541345739
4	26	0.0890937649510474	0.168123040281852	0.199509383927089	0.204100859968481	0.264919995913548	0.253073405055425	0.225813796630392	0.239975763137973	0.246959667857431	0.0681160397606947	0	0	0.253073405055425
4	27	0.0730767656808123	0.161622691825932	0.208309631500341	0.225069471463281	0.280705359061187	0.253713413799348	0.218741436482857	0.238477179848985	0.228557224150819	0	0	0	0.253713413799348
4	28	0.0790157794511566	0.144685020066167	0.205282421468268	0.227296050938719	0.266183780060382	0.246966614022377	0.216700385812583	0.243369546391166	0.238947576500786	0.050351250322248	0	0	0.246966614022377
4	29	0	0.155454510123975	0.208800658100032	0.227537533534345	0.272570477854874	0.249147010747362	0.219924465586157	0.227255389031598	0.234288720590977	0.0923901896401036	0	0	0.249147010747362
4	30	0.0848098012991166	0.162759923442384	0.209569946704004	0.228352980196491	0.258262061092246	0.263871472055189	0.222429631387921	0.239427573705414	0.230928877516373	0.0811491366949092	0	0	0.263871472055189
4	31	0.0863376683476612	0.152009181354555	0.210984092327169	0.238644231672096	0.2637608434391	0.263498004322593	0.221218659869747	0.234757896475776	0.234772626792087	0	0	0	0.263498004322593
4	32	0	0.154855023997757	0.208557067195307	0.204470964349879	0.27621527689016	0.256831053886606	0.217757057570713	0.229001030553872	0.231376210061412	0.0847711222085929	0	0	0.256831053886606
4	33	0.0532266812578742	0.153138096305412	0.206145564931927	0.217999806315686	0.263273445732181	0.260032887553338	0.212641337324548	0.230506609200337	0.23012557264642	0.0683750865799532	0	0	0.260032887553338
4	34	0.0531656135444717	0.147963358353938	0.206722484345013	0.22407421873587	0.257825199805028	0.265023698292491	0.221885396674425	0.229697681999955	0.233667144501686	0.0734808387690783	0	0	0.265023698292491
4	35	0	0.151847719998146	0.209235858380326	0.224948375240941	0.256483747196094	0.270349081084538	0.22934993696725	0.228088750891336	0.223833186390716	0	0	0	0.270349081084538
4	36	0.0725818977843648	0.144543762069404	0.210057820800403	0.23423875340255	0.270370098801032	0.263490495508071	0.221504932170037	0.23672094914605	0.220254520002866	0.0659779013617179	0	0	0.263490495508071
4	37	0.072123221080752	0.151518907648215	0.216846789468332	0.22532936835066	0.267765679232921	0.273477073524963	0.214409126450631	0.229744124305029	0.217519465812836	0	0	0	0.273477073524963
4	38	0	0.148396134577487	0.206965560459901	0.203982928704511	0.266351016915765	0.267716849756712	0.218794730764532	0.233090851024631	0.225940450009786	0.0615644512083256	0	0	0.267716849756712
4	39	0.0582206375858463	0.155664371737559	0.20105473313	0.229485429683889	0.242735661668861	0.278220656407493	0.224922820377503	0.227702343524641	0.222513989685058	0.0754979087079287	0	0	0.278220656407493
4	40	0.0792996257057669	0.151950281867773	0.205524475733076	0.232306729659478	0.264637207892359	0.27216043336995	0.225170769238953	0.227613977099766	0.205381447823277	0	0	0	0.27216043336995
4	41	0	0.146831019521185	0.198467846744723	0.213346695157588	0.260027585011536	0.271243053422813	0.227809277010546	0.232380960618826	0.214770050403529	0	0	0	0.271243053422813
4	42	0.0531445638425646	0.138567695664884	0.200116158388691	0.213467306973291	0.257484668252961	0.280094827411409	0.222923352932229	0.244536855636992	0.216597337776321	0	0	0	0.280094827411409
4	43	0.0801016329518892	0.141272070229171	0.198274614306305	0.213956445019863	0.267041408487162	0.274683770532217	0.220680929308564	0.237546918434162	0.22018612247821	0	0	0	0.274683770532217
4	44	0	0.139952485825936	0.187844220528132	0.239452987718928	0.27178196597241	0.270546131220104	0.230680561110418	0.234592952139882	0.206503161233798	0	0	0	0.270546131220104
4	45	0.0744030457630813	0.13352650167242	0.190590266104439	0.20390469029806	0.248152425576773	0.287964162666343	0.220572477406292	0.23481668909401	0.214421343125982	0	0	0	0.287964162666343
4	46	0.0794652307829233	0.130457867979247	0.198352576903296	0.226459229694824	0.258963841813323	0.281523892305903	0.225118568044957	0.245804070515177	0.217955149265662	0	0	0	0.281523892305903
4	47	0.0765812300936667	0.137338367917513	0.195754393654867	0.227429130934045	0.26900297082731	0.28942983778987	0.226030839072261	0.231168563728048	0.216612586185361	0	0	0	0.28942983778987
4	48	0.0823552277451469	0.131385154265878	0.19771136127643	0.209033320623709	0.256701154357652	0.279347477133067	0.218934964497229	0.223930979490801	0.218878550125656	0	0	0	0.279347477133067
5	1	0.166682779335336	0.198443016095713	0.217522839064158	0.253683793022927	0.259777439702537	0.300747397327874	0.351629829461775	0.31215903952512	0.22432673672435	0.304575435658359	0.260475762952602	0.296975566005221	0.300747397327874
5	2	0.168803258386159	0.193390977409873	0.214878518387753	0.248363054435013	0.270413955597608	0.296032850816204	0.313276106306702	0.275559979250341	0.32036147429696	0.286409274155236	0.277031951569347	0.288811362378826	0.296032850816204
5	3	0.171170932961523	0.192703898841444	0.218067846099965	0.248809026550592	0.279282208947147	0.30078885531383	0.352764813911104	0.308631912562539	0.325888187929946	0.279439971580794	0.266009707160625	0.296690645030757	0.30078885531383
5	4	0.160455179252504	0.19612694539663	0.213312687134001	0.252353407404549	0.265245854074877	0.30779293019973	0.351932396349888	0.291074104931525	0.216866585266186	0.314497768742091	0.276947748649171	0.299534480214708	0.30779293019973
5	5	0.165258885880587	0.198986617659643	0.222070698411878	0.239463083800129	0.266993499733897	0.286890183218406	0.280394956115506	0.325600461758422	0.322226705401826	0.285130527629081	0.277684617489236	0.298409531081455	0.286890183218406
5	6	0.168002011410793	0.198974067473668	0.219087049423828	0.246323814902368	0.270259957209742	0.292350842775236	0.337334775121847	0.334106652340938	0.305579274087785	0.297855514296226	0.272901280450747	0.300062587115588	0.292350842775236
5	7	0.172063732406483	0.186055185616669	0.227808350957162	0.253330014474163	0.272899436718311	0.297564101234852	0.317062588300088	0.303269947177327	0.321963227918974	0.190983711171273	0.272675517138893	0.29522866849856	0.297564101234852
5	8	0.161025665172081	0.196096023466319	0.21375121504698	0.254268257525052	0.266168138355491	0.300300093762575	0.302045227407742	0.316642134168252	0.305544235425444	0.300874972287637	0.283579404533127	0.2956377234088	0.300300093762575
5	9	0.169115868359978	0.191672068206927	0.220135622077779	0.249716264916678	0.264072859358194	0.297129230229239	0.241454839425231	0.310266667494196	0.331315659917277	0.271157580418106	0.282090932826539	0.294544623355447	0.297129230229239
5	10	0.166464689510061	0.191556102814679	0.208519507559254	0.251504311119939	0.263397478258341	0.288501854875106	0.298445755679025	0.329336664291871	0.22745845228317	0.286125786306479	0.282886426098934	0.294634955078313	0.288501854875106
5	11	0.172976456682166	0.196486513145507	0.222425562583744	0.245389755402169	0.274007620917086	0.293803417310998	0.335412613003039	0.270395160032634	0.297834160933848	0.286693554004865	0.264793805121217	0.299972683446366	0.293803417310998
5	12	0.161996827365314	0.189720044586988	0.210220418341289	0.23373441061616	0.265869532658283	0.284356642284063	0.274886782800483	0.324023539065778	0.298371912638851	0.288581926532362	0.309520175852443	0.302493161612608	0.284356642284063
5	13	0.167323970999409	0.191989896011445	0.203144214724024	0.242934356101767	0.263946118175738	0.295790537769901	0.243827239375054	0.321874583881841	0.312310181495366	0.288430364125094	0.277124658756596	0.294579952764331	0.295790537769901
5	14	0.161716118332771	0.193117748227636	0.228883642360081	0.240767450549599	0.277560259375092	0.295241866456889	0.320681893025346	0.305218944053117	0.300769692001048	0.282719718861402	0.277272180180058	0.305452454027624	0.295241866456889
5	15	0.167931188516193	0.193171571660172	0.213239627804848	0.246412920277233	0.276640015975493	0.288775096223301	0.358475769614944	0.331082779033806	0.329946395475216	0.277167313032142	0.284456493030541	0.30837590306044	0.288775096223301
5	16	0.169030071888146	0.183857664750257	0.218790049934816	0.230103991534748	0.259555839450523	0.280783180257443	0.323595546238359	0.313911054561865	0.218691459141453	0.289565099475526	0.27990220766353	0.302142579936959	0.280783180257443
5	17	0.161429891713972	0.192569773761667	0.214998240468832	0.243751295332367	0.270160489094534	0.281956878544278	0.274699808942787	0.310082157248057	0.303068474132794	0.29056086181059	0.285240250141126	0.294580238092243	0.281956878544278
5	18	0.166010096734083	0.207242014328338	0.212910827736781	0.245003528377648	0.272053009535209	0.286728076255678	0.345371879140003	0.341620494860754	0.310855090642298	0.247647558717091	0.289093465388755	0.302752961378904	0.286728076255678
5	19	0.161286894832771	0.19789881226482	0.21496171735618	0.245766612766514	0.260273034477117	0.283037905831485	0.329687475274362	0.325543717062009	0.277862655970952	0.285615884297474	0.286332902966231	0.296662946788791	0.283037905831485
5	20	0.165843103098149	0.188558614208272	0.21643546586999	0.248546005164569	0.259479697984899	0.286076422828946	0.277116301341977	0.274535944489375	0.331110377015853	0.285492473467285	0.273104736120947	0.304129809026073	0.286076422828946
5	21	0.159693388693708	0.191534472103798	0.210331462975983	0.239262157465839	0.276327508118123	0.30225111631479	0.320774936579685	0.303919436153431	0.29852610617378	0.279183633853603	0.277551043705131	0.299289078939843	0.30225111631479
5	22	0.16436618986265	0.190070766553898	0.217919220503266	0.233706904992493	0.275469053502106	0.292125864189723	0.334509252114323	0.319182818982086	0.227678769902554	0.287214561806013	0.290300209276832	0.301573116444741	0.292125864189723
5	23	0.160856836958137	0.19044922511609	0.211326446926447	0.241633750586072	0.256180699095118	0.291455220951119	0.275945073553394	0.325650183271966	0.217194161929917	0.263864657428956	0.284177723149592	0.304827436447006	0.291455220951119
5	24	0.164781022499201	0.193050842320709	0.21852504994063	0.234262537121221	0.273755163595677	0.295369688072741	0.305624672503385	0.335775685866764	0.295307497113482	0.301541650057874	0.291841055538152	0.30518818217073	0.295369688072741
5	25	0.159742400651877	0.18267895034817	0.208426804204692	0.246034915066407	0.261278726417183	0.294016502854043	0.315181699738925	0.326029500124577	0.327535395330522	0.275846179803195	0.275258640220992	0.292701287848652	0.294016502854043
5	26	0.156048599775915	0.191761619962302	0.214775170329518	0.230307769208575	0.26336690520547	0.290887839658734	0.342361856303633	0.279600725234654	0.287272407056198	0.283940942876266	0.271001730871263	0.308074155287673	0.290887839658734
5	27	0.156206886488412	0.188811250677653	0.219319534057984	0.226505089756436	0.263272223925281	0.28182364010655	0.33935646947774	0.25539022951939	0.333307969005073	0.278617572743321	0.282294248351416	0.314649515831193	0.28182364010655
5	28	0.165240005189432	0.176302478636547	0.210540207430693	0.252952884670046	0.259265628525714	0.285396881888578	0.24260311325212	0.587255781527394	0.161439639642322	0.279412266072249	0.268163131672594	0.306828255072923	0.285396881888578
5	29	0.163818678933409	0.185450496088057	0.20953825629445	0.232839274497908	0.281724979989017	0.280766829172456	0.240112648560307	0.274094423576659	0.28791239188243	0.2692406688815	0.283361474598268	0.309977937159589	0.280766829172456
5	30	0.156993933345241	0.191014394063243	0.223526232308148	0.235007078597284	0.254820561125177	0.277327254539434	0.243569174614958	0.314755287774964	0.292591282943514	0.286376847879892	0.27877790714719	0.309662804517154	0.277327254539434
5	31	0.158986556096816	0.189238556457525	0.212933374496412	0.233569677647527	0.25712239327465	0.280472217518252	0.259946664508827	0.305659737568093	0.280939410408639	0.280811781715818	0.27907589987995	0.317619817747958	0.280472217518252
5	32	0.159289457619096	0.182193718858982	0.213082447834979	0.248694289726887	0.253571403280592	0.267016952826612	0.307911516882357	0.290951943729067	0.305281561610198	0.221096954472674	0.289691460320539	0.300417085444923	0.267016952826612
5	33	0.161432968741023	0.186359106637826	0.215856615159358	0.229784785722644	0.28225936797898	0.277910076462947	0.342263661288477	0.335556826033759	0.247958535560613	0.284944338336397	0.293551209247662	0.321523807134933	0.277910076462947
5	34	0.162496993805615	0.188542477818464	0.209908930546901	0.244685069943567	0.261096495599996	0.272815164414289	0.328216329287175	0.317080564118272	0.219939553731455	0.280588715570774	0.27667754091829	0.310593672533289	0.272815164414289
5	35	0.156461098964511	0.201373366358566	0.206855200894924	0.236731606833222	0.269702827660713	0.28958568741359	0.324460218595751	0.206055379290745	0.293581442973139	0.293339713947945	0.280980993794083	0.322680614398655	0.28958568741359
5	36	0.158017325019515	0.179317626923048	0.21545887419941	0.237773161016989	0.271309967773869	0.275441863911776	0.258172484403176	0.279055962752441	0.279334328358064	0.280169421428914	0.280654817849058	0.320548524682862	0.275441863911776
5	37	0.159149877099745	0.179680697021933	0.209705420511687	0.230023116958371	0.269419842732404	0.2706097878477	0.266078630048392	0.293443116925753	0.199010659854041	0.262816193684343	0.279069627137843	0.323686687251005	0.2706097878477
5	38	0.153328610812121	0.187154146221063	0.210037669317101	0.238624083900536	0.271840019597523	0.26153770800751	0.33743278844204	0.318587462448603	0.316552720081562	0.289195880967842	0.290379284316677	0.32438868880098	0.26153770800751
5	39	0.161382803711194	0.18202500536459	0.206062910355498	0.233135867222649	0.249723911725194	0.264109547839232	0.272919616577762	0.338668320003404	0.307560394847147	0.268801155169471	0.279333538494011	0.328639190045618	0.264109547839232
5	40	0.151414339898825	0.176636314659932	0.218603297554005	0.233542261210715	0.269856401600487	0.251081062167866	0.336832154966299	0.314947358228509	0.313609806047625	0.269332732854058	0.271880316198232	0.320978556784498	0.251081062167866
5	41	0.16467655055323	0.180068031747726	0.213932161573	0.235362133568282	0.271498123619958	0.280851737451139	0.339581228499058	0.153309440421844	0.221637945767769	0.265781416187566	0.289363542540021	0.328046803144293	0.280851737451139
5	42	0.15809631856776	0.183264634274734	0.213314595859681	0.235455469578692	0.258019587434785	0.285443788388533	0.32072067196025	0.333717295230349	0.297290516613062	0.314244739744842	0.288254662389816	0.334443406156375	0.285443788388533
5	43	0.155577613003799	0.188383539449181	0.208057182443372	0.232023411291389	0.258030029129612	0.270615328339157	0.317695835690559	0.327770918718032	0.291707973026061	0.272845185681476	0.281727177445025	0.324353126291848	0.270615328339157
5	44	0.159484680741824	0.182507524888639	0.212232297363125	0.24151364283673	0.267471120962282	0.275469899708039	0.286304414376144	0.317520726419302	0.307561200238608	0.273751738970208	0.28039688496172	0.32417656498538	0.275469899708039
5	45	0.156284187165943	0.185101783880592	0.21982151034442	0.234408813007601	0.259839761527977	0.277847388176628	0.216994544693713	0.320203497812163	0.286893209024686	0.293265353105898	0.264463782812993	0.317577759724095	0.277847388176628
5	46	0.154397270311457	0.180694388410877	0.213308731827668	0.228451086175394	0.255453987704503	0.233718062788349	0.320513395675017	0.317522649752299	0.27123645795797	0.279123293553323	0.284308321352777	0.334525085379925	0.233718062788349
5	47	0.156816926328943	0.176739648358797	0.210996349333598	0.229891851227703	0.258582651521592	0.279621349170321	0.168081916402778	0.18523338886822	0.295925780747828	0.278859100723396	0.284044563128732	0.328521855973889	0.279621349170321
5	48	0.162455020266264	0.185245368343029	0.21021134321739	0.246195693603812	0.266025324753066	0.241956465735059	0.239699044946303	0.303887002817827	0.298124307250122	0.273894611032977	0.274128305395404	0.327976527579918	0.241956465735059
6	1	0.298954380111074	0.360627417573588	0.347317808445999	0.368486328761496	0.382912060336588	0.402164689973743	0.298954380111074	0.2974992631724	0.315990329027042	0.295703129592493	0.242643336413785	0.161767536814247	0
6	2	0.281942311647486	0.346367374595143	0.34493375779199	0.365683907754294	0.373725928761985	0.388895321856233	0.281942311647486	0.299225400190416	0.311675929880664	0.291612083512739	0.227173745898415	0.165217785675536	0.104890478840743
6	3	0.295480360502336	0.346754842171835	0.346889529299122	0.359252041741325	0.376282284141596	0.388677352726087	0.295480360502336	0.305799655158995	0.310560264166553	0.29336122357487	0.197230895332047	0.170922374863482	0.117047363215525
6	4	0.297188188642401	0.353334892083755	0.358272426723248	0.354792597825362	0.381900992356977	0.388832133666321	0.297188188642401	0.304909876389869	0.323304947317641	0.314051317685453	0.261106360088579	0.18231374372157	0.123314749800538
6	5	0.282149196137206	0.345781517974141	0.357916121809847	0.356300110026696	0.37196270242325	0.397383385084686	0.282149196137206	0.30715019488614	0.310469434923802	0.296954444304019	0.230906236774522	0.16125023362227	0.111475139371793
6	6	0.28450715415439	0.350763743267958	0.35541749415741	0.368535920406577	0.377933350500788	0.394101297543576	0.28450715415439	0.299137719499278	0.30846619767078	0.293086267433092	0.18952539363521	0.129502645091526	0.12062289663824
6	7	0.28836357987996	0.356696699368643	0.353050930231574	0.363208671421956	0.375164153848008	0.386531731984361	0.28836357987996	0.302686033090083	0.308355384499527	0.300802759773601	0.243092947134625	0.187245775975242	0.1248938402358
6	8	0.298470687271344	0.361984472336917	0.350618468059414	0.358529596222692	0.373171126254129	0.40357134133895	0.298470687271344	0.308610999400534	0.314773175061476	0.30105093028044	0.236586620800091	0.155870697891482	0.112684003648569
6	9	0.300352660660493	0.36027339616481	0.356079153259054	0.361443599216812	0.382060504275224	0.376373298450073	0.300352660660493	0.308231241200916	0.313490773333567	0.296454095313982	0.242071332730059	0.164482611720702	0.101997623455373
6	10	0.284716297734637	0.350590104958582	0.350052029244812	0.36277453511216	0.373409439534274	0.390739189623229	0.284716297734637	0.308338045299096	0.310243285400925	0.290391143306813	0.250021476493181	0.172524108392737	0.120756758453879
6	11	0.294545740796663	0.350132351808168	0.357212747442504	0.363041002196069	0.373266465737992	0.39344918339771	0.294545740796663	0.299632413863989	0.314341149483065	0.310753538556503	0.224896430916153	0.142740503474304	0.116616035871093
6	12	0.28813019144189	0.359711663162565	0.354301324179792	0.362208385810855	0.369291175870535	0.387428327147084	0.28813019144189	0.310113750824483	0.307927091827588	0.302171961673003	0.224217133175013	0.165954415853764	0.132561472068635
6	13	0.283127524022819	0.365563692376496	0.357014234038358	0.360963467572467	0.372328969764768	0.384659626938575	0.283127524022819	0.311344373828767	0.315821896538257	0.293992969073181	0.223225444572011	0.160339736877475	0.121629828959291
6	14	0.285611840496981	0.365921735122406	0.354344010209691	0.356266913252618	0.373303055287309	0.391260552572685	0.285611840496981	0.309250878231932	0.313357380203266	0.297110072710471	0.23399944425217	0.15409483920974	0.136396805586813
6	15	0.287802279056177	0.365071395946112	0.35440308383747	0.360371142329901	0.375245563800643	0.394039118102146	0.287802279056177	0.302054028603618	0.317227971765364	0.294526613619689	0.2293151394572	0.164174794015374	0.132115056360283
6	16	0.285322999991514	0.35320476953776	0.362829781832435	0.369897968475204	0.378392304035349	0.389599236570239	0.285322999991514	0.305810184384494	0.314597285368351	0.294657284205054	0.237686500717902	0.163058219419119	0.113324592229786
6	17	0.295452937864014	0.350115946496076	0.350258549090505	0.36919759462508	0.3744204965436	0.901534247541374	0.295452937864014	0.312754738200895	0.311648491848349	0.29622848930254	0.226348795453334	0.160627088152146	0.123761110926363
6	18	0.291504696513867	0.344442723161215	0.356573974934931	0.359392168751502	0.381147439161123	0.393083697534671	0.291504696513867	0.310995833853737	0.319311744268704	0.292824509044237	0.246305177653139	0.14200896664991	0.145333205440112
6	19	0.288061188890749	0.34857800463628	0.348197217069137	0.356907188644995	0.375497413476508	0.381948351004638	0.288061188890749	0.301738479426149	0.313597940505383	0.286413605657936	0.231217315637665	0.151232621481384	0.125723538966754
6	20	0.289071934437336	0.342382587028139	0.353424004953695	0.358909900904637	0.372023934205768	0.391622647230842	0.289071934437336	0.307801506120933	0.309959531597064	0.277980687159975	0.203476203695358	0.149654607021257	0.135988359553995
6	21	0.287085518379472	0.340186861710926	0.353349958455327	0.364994066859634	0.376132996701662	0.383764943526562	0.287085518379472	0.312083284972499	0.319425850186374	0.297790769229799	0.2493743630037	0.156729739938343	0.143739291422789
6	22	0.296246723368869	0.345518355162462	0.350932799812538	0.365842557372581	0.375977746057768	0.384017529965474	0.296246723368869	0.308012180130303	0.310052619055859	0.301845218700369	0.223841520056927	0.171215075486985	0.148563465320263
6	23	0.286089985700702	0.341887917936174	0.3533994061606	0.365707341335341	0.378807623090274	0.383456056839234	0.286089985700702	0.302927759513573	0.312861526964149	0.294229596412612	0.238387323650175	0.14726022354102	0.135263818551703
6	24	0.28693516073329	0.347776619618773	0.346401187040582	0.362065945333196	0.383877986418996	0.391527460769169	0.28693516073329	0.311188627650634	0.310326054220402	0.304384463438447	0.221719420321297	0.165117165925806	0.165752211818879
6	25	0.293150167237423	0.342450247578554	0.350381705894962	0.363728059513962	0.365447332722706	0.390854188615886	0.293150167237423	0.302538905822492	0.309957665155459	0.299178212367807	0.216650388162099	0.159005768729289	0.157407684328333
6	26	0.28692367371455	0.350797476138521	0.352786922157319	0.360762076975931	0.371778226312948	0.382181041122176	0.28692367371455	0.305386099048974	0.317722634694543	0.289382502581324	0.237331997276921	0.13277059439803	0.159476995688398
6	27	0.287373052673391	0.352135578034972	0.351805470520056	0.356442257147064	0.369269275189236	0.379437382431484	0.287373052673391	0.311866329480073	0.319640768898381	0.291594240128552	0.232505080864138	0.161394448030989	0.170268008076067
6	28	0.29757512612073	0.351038386996587	0.35030959559049	0.360800579746628	0.365622240838389	0.382813990178794	0.29757512612073	0.304385882100364	0.313053294365835	0.293669732573111	0.218760081085672	0.159477058189997	0.149706425699204
6	29	0.292749800661695	0.353675093795519	0.355145615598249	0.373417208840854	0.370992781067956	0.37590867201999	0.292749800661695	0.31002514947356	0.308181560600131	0.296878357792542	0.240308818002902	0.157144467624898	0.169343289769324
6	30	0.295135681377023	0.352587783539325	0.354776954276462	0.364911956541445	0.367680021400164	0.379616438919578	0.295135681377023	0.308954696474937	0.318770390459817	0.292818141315243	0.223635706333487	0.163691840289145	0.197052114093581
6	31	0.297799083422158	0.351350396480925	0.351759037638385	0.363449890045567	0.380469469030968	0.38508058108962	0.297799083422158	0.308202329219234	0.311626715028828	0.302307727829206	0.195518711140656	0.14594305302711	0.182905488327314
6	32	0.28667298218477	0.359726253554942	0.35543911459219	0.361908670198007	0.368374883876984	0.393916011790036	0.28667298218477	0.312677642926552	0.312653059032633	0.285400547648848	0.217157678353945	0.149020858449556	0.21762864904645
6	33	0.297256621603073	0.355905243298901	0.355121151238934	0.359356173315967	0.368484885109404	0.38666541488337	0.297256621603073	0.299305662584412	0.313689409949271	0.293055761037351	0.240609698504661	0.130248696861788	0.206449580363223
6	34	0.293010975212585	0.357002236230911	0.35358983971333	0.35810197355739	0.368747900847546	0.377817323296428	0.293010975212585	0.308528906244224	0.305319403297994	0.260704958319643	0.195346165063466	0.137660267467642	0.205269206311007
6	35	0.293738575683251	0.359048480715496	0.353526187728269	0.359605784077621	0.366703214650768	0.380911867004896	0.293738575683251	0.314882215973856	0.312426608292209	0.262094877776137	0.201245871078745	0.158801493369244	0.203834945718055
6	36	0.290690188679671	0.357458381003685	0.345888153446485	0.361647630881416	0.368374483840935	0.377703769314146	0.290690188679671	0.307976981496912	0.314767506982098	0.302370135649245	0.208872452491508	0.13340750790773	0.231060892393731
6	37	0.294600466444801	0.36414445708628	0.350257726533979	0.365969815129234	0.369142606789998	0.377911467961235	0.294600466444801	0.314817130788436	0.304125298405443	0.299094566395733	0.21668875630599	0.130703564304393	0.218060038121348
6	38	0.285093851848872	0.355750284473341	0.345620899996337	0.359258211990745	0.365118238580965	0.386848478474341	0.285093851848872	0.305417595568912	0.311363411643926	0.305902410437241	0.20637403729689	0.138764964066812	0.248499857051828
6	39	0.297133563518505	0.363574869548057	0.347196684514669	0.362769745051858	0.366454874343563	0.384901876993352	0.297133563518505	0.305243460246226	0.311085965759141	0.265135510450412	0.223995980081135	0.145482284049671	0.261231409859973
6	40	0.291817890775407	0.358983302708565	0.348198062518538	0.368563258739916	0.367559619139278	0.390298779314147	0.291817890775407	0.31568125135405	0.306693065122829	0.305853629836998	0.19764088073242	0.126733074797861	0.252342169666509
6	41	0.287812092690343	0.349786744691073	0.34571256608137	0.364340450588131	0.392905309673269	0.388950372501335	0.287812092690343	0.303695104031608	0.309261842867948	0.290127087573046	0.168960873730471	0.138633187676064	0.208518846542313
6	42	0.287898732125588	0.350202110973497	0.346573419329914	0.369100510525156	0.360512077165402	0.380723301831733	0.287898732125588	0.304277914856888	0.30134399743345	0.296248983053623	0.199101680784887	0.145584652815728	0.283994837460978
6	43	0.296647323229465	0.350656822100236	0.349636717305785	0.36967325925714	0.381993137606229	0.379090180012731	0.296647323229465	0.299093806286858	0.307131546949399	0.287492895243299	0.190598931766316	0.147696306853847	0.283189447575841
6	44	0.289886003804275	0.352363740511027	0.349730239207884	0.361494572742922	0.365863083124941	0.378221453583496	0.289886003804275	0.296490155012743	0.311370065403753	0.303344517683476	0.201205801402286	0.136255186853913	0.278345471561249
6	45	0.289734560950112	0.354087134122512	0.35025531809695	0.359003411394034	0.367548813407885	0.385138104291836	0.289734560950112	0.310670532135882	0.306965459848792	0.262482917443947	0.190716551609737	0.139138758910098	0.290541084736829
6	46	0.287117448989944	0.351067348988973	0.348959536179141	0.361833075765677	0.373826454709269	0.376956148377436	0.287117448989944	0.298885317278583	0.304707892601418	0.289014038601489	0.207010459269133	0.13742719794189	0.282945536601776
6	47	0.296222690628766	0.349218959562312	0.350292565959777	0.356602668845017	0.37380856095803	0.382925038941205	0.296222690628766	0.308027754120162	0.312672636897679	0.271698891663774	0.199903162154446	0.127272915300712	0.302191540979169
6	48	0.29221449388414	0.350783081294448	0.353504192172107	0.362673423677438	0.356389217488001	0.382842520290401	0.29221449388414	0.303201854844769	0.300072719754169	0.257748579153378	0.18096509328425	0.128112821274928	0.311409304835033
7	1	0.158728898976992	0.203430428129626	0.242949955608831	0.246330724494102	0.245163103590518	0.228278516657666	0.158728898976992	0.166779520809081	0.181466466811598	2.4205455909762	0.269941962478067	0	0
7	2	0.157533431042643	0.201200218985924	0.246330371622009	0.251439370277166	0.238239713369358	0.226828954918354	0.157533431042643	0.167329583689247	0.185595496132657	0.144427020356658	0	0	0.0999302486864175
7	3	0.157730448127976	0.201333433573655	0.242748621459737	0.249406611683486	0.242137439250899	0.226750545872842	0.157730448127976	0.168688681664215	0.189812946310873	0.175583067471305	0	0	0.071344334154031
7	4	0.154247169949523	0.200613207183497	0.2393629672823	0.251266870475344	0.240476952372143	0.231792194381907	0.154247169949523	1.18089775053302	0.930974266197124	0.144823555918415	0.037493176241924	0	0
7	5	0.151090267369337	0.196932565218857	0.239356456434919	0.248677619926591	0.242006010689949	0.2300479249386	0.151090267369337	0.911651082511259	0.187864178680569	0.106095617614419	0	0	0.940723752534729
7	6	0.153439565104301	0.204856444912868	0.238264631466054	0.245994805257099	0.243009045828573	0.232388544	0.153439565104301	1.44292908396017	0.184334008180031	0.0929446635356707	0.0391079630069956	0	0.104111032333763
7	7	0.157570142348867	0.201123078726944	0.241050569725249	0.246698911287468	0.242186107777622	0.234920921092071	0.157570142348867	1.34460272637965	1.4218248594387	0.107217564810338	0	0	0.101331085134324
7	8	0.148456848038293	0.199733761850159	0.238969445635842	0.244204824494196	0.240127332976421	0.2302008316539	0.148456848038293	1.41554223342125	0.190669150521279	0.0989933367585027	0.0496962070860828	0	0.0992207204614957
7	9	0.149413402979901	0.194694584226364	0.239361896623304	0.244854665088846	0.401270367089042	0.230427776524212	0.149413402979901	1.54644310429354	0.185030269303321	0.10440712933642	0	0	0.10799066096764
7	10	0.154089247915189	0.197189879558834	0.238259433719017	0.242279242182761	0.23919785699304	0.237501280011009	0.154089247915189	0.173113585355746	0.185484528584561	0.101128390582115	0	0	0.109375444337742
7	11	0.149671919153216	0.201148962875947	0.239808403494538	0.2428605492918	0.237755392197464	0.230979107670197	0.149671919153216	1.53562232613811	0.184421239890642	0.0924704117799908	0	0	1.68407705693151
7	12	0.150216107471521	0.194763464257849	0.238034277965592	0.244057549572213	0.237910802758518	0.235004438538334	0.150216107471521	0.178586098143776	0.185297832051601	0.111400008466401	0.029181428821972	0	0.686820833587173
7	13	0.147727725982796	0.199914830866029	0.236408807020087	0.246121542564446	0.2420386328694	0.241205886459079	0.147727725982796	1.65716381737936	0.188374411819732	0.0974947742800985	0	0	1.93010549986799
7	14	0.153208740070177	0.194140740514911	0.230849717029883	0.244632783123806	0.242214027628123	0.231201417639494	0.153208740070177	1.14023890708807	0.182933075763563	0.100609087415212	0	0	2.18202307944892
7	15	0.154155650960775	0.203186575375586	0.233486736405302	0.24418915799547	0.243658039298788	0.237236822326255	0.154155650960775	1.46853961900288	0.191996878076697	0.0946665795734135	0	0	1.4847866341592
7	16	0.155457446625324	0.196452587648758	0.238371526874923	0.246706017963846	0.238977334774849	0.238672244397195	0.155457446625324	0.996332970467354	0.185251407927791	0.106103947915694	0	0	1.20876987864647
7	17	0.754980702404541	0.189045388299612	0.234927076881921	0.243252081790286	0.253568665956997	0.232718878710383	0.754980702404541	1.55515122792982	1.23683413765262	0.103742080588923	0	0	1.97685960878191
7	18	0.400696737880826	0.1938302505766	0.23437374350254	0.245641607348566	0.25653092059976	0.23734618296133	0.400696737880826	1.30261699230214	0.191298044292415	0.103091826983048	0	0	2.17168779398869
7	19	0.372687668008247	0.194821081666455	0.234372871188859	0.24375870664313	0.256088290647269	0.238281428323197	0.372687668008247	0.160462418165168	0.190008894427436	0.0935780211430183	0	0	1.5500048794089
7	20	0.31491180230515	0.191246420932098	0.237817004709048	0.243715752744135	0.259467243976308	0.240982553803552	0.31491180230515	1.37278301076397	0.18926162749351	0.199973203590718	0.0121747322441574	0	1.62694472788291
7	21	0.156284736312383	0.192520107336044	0.231592654019236	0.24115338232039	0.252050573253868	0.238787999424393	0.156284736312383	0	0.186368220675689	0.103405665596418	0	0	0.12096271808066
7	22	0.153175246267502	0.193972199623235	0.231655997463211	0.248337880797218	0.261653794232888	0.238763495298276	0.153175246267502	0	0.19385401918341	0.0930933139450992	0.0408716951658185	0	1.06226265185455
7	23	0.158992158565243	0.19247549878318	0.233238191599575	0.243615284594274	0.257355789557241	0.235591589199735	0.158992158565243	0	0.191767943905805	0.13911547112656	0	0	0.179910152869655
7	24	0.593281065208856	0.191652038272558	0.233565020987721	0.244927272994909	0.255246239174323	0.238629335571192	0.593281065208856	0.0273704222626635	0.185599002219764	0.107038876519952	0	0	1.58438647775462
7	25	1.45976648572156	0.189555980501428	0.234634752856832	0.242826926735791	0.256441158936949	0.236061234158061	1.45976648572156	0.0552675196655652	0.1862744020986	0.101495124681686	0	0	0.128854687991259
7	26	0.157345805625556	0.190006450425766	0.225295132163389	0.240729816393517	0.254810780921817	0.239739977979387	0.157345805625556	0	1.0118536093329	0.106614581889594	0	0	0.155401055951929
7	27	0.157733682450551	0.188100746759964	0.236685271243988	0.243562041193489	0.253153660712585	0.239276233888426	0.157733682450551	0.0570208650749481	1.12108466381284	0.100843556348859	0	0	0.192537587454786
7	28	0.283611263098628	0.188070851009777	0.231679263707615	0.247642901675723	0.254079742249386	0.238373111859961	0.283611263098628	0	0.192768838680916	0.103346889000274	0	0	0.18725789061335
7	29	0.319599773303296	0.189239804722737	0.231191099546191	0.245866393910305	0.258068146868902	0.23738026447394	0.319599773303296	0.049091729369078	0.185175840455975	0.0923038013474507	0.0145813469285924	0	1.63951621525665
7	30	1.15550678190926	0.187356016856819	0.232926416804621	0.245311195817029	0.255124104498838	0.236728611813457	1.15550678190926	0	0.192300805410604	0.105137546194809	0	0	0.151820803845805
7	31	0.159921264377472	0.183623787113701	0.231360218223143	0.247622622928637	0.254985961456122	0.238608624084869	0.159921264377472	0.0474155895820364	0.188546519480578	1.0808186192079	0	0	1.16796153512943
7	32	0.161806275818213	0.187901329878911	0.229531913912121	0.243038490043264	0.255584762524422	0.232486304946484	0.161806275818213	0	0.186210376759455	0.188598977108074	0	0	0.151730161092344
7	33	0.154873806353624	0.184144783169175	0.231411024085649	0.243382064289077	0.2571450654408	0.235135966012568	0.154873806353624	0.0507533059434659	0.183389177148303	0.178752982820886	0.0255539652471183	0	1.58856491504119
7	34	0.150492260183059	0.18654837012689	0.228869691493019	0.246346940474382	0.2591474424145	0.236290325916793	0.150492260183059	0.105698524554296	0.186976775048919	0.100495240545408	0	0	0.203045628804215
7	35	0.154462297962916	0.178297991417446	0.23586242256781	0.247635238353428	0.255847048953771	0.241397165876635	0.154462297962916	0.103554722975582	0.194382914812011	0.110211904428645	0	0	0.960432671804106
7	36	0.155242138926191	0.180148129082936	0.232048091276924	0.244048896850381	0.256350317448186	0.237304504250001	0.155242138926191	0.10143376628646	0.188239630617394	0.0984665799504319	0	0	1.69301171760623
7	37	0.153059487533718	0.179560034485025	0.229193042563814	0.245645807767997	0.255719766221031	0.234616280464816	0.153059487533718	0	0.186556904170181	0.109475905995229	0	0	0.154850675959508
7	38	0.159903630076074	0.175614171918905	0.234467159139473	0.248650950803124	0.256930206164	0.233767459895018	0.159903630076074	0.055122932407709	0.188766834499556	0.102807043516165	0	0	1.14848701229159
7	39	0.156307882762834	0.177670070232978	0.227155120011786	0.250255483178538	0.254586552316259	0.234214954640875	0.156307882762834	0.111885107420891	0.184544879147333	0.102677838015443	0	0	0.225080241105954
7	40	0.155959720837703	0.178970933405484	0.230224617259028	0.247498540292113	0.256495274480231	0.235143003442775	0.155959720837703	0.112898673440588	0.182870184113701	0.100022505063639	0	0	0.154128108797107
7	41	0.152651479879772	0.172421322232541	0.231361630743919	0.251144239874185	0.255264264771514	0.236665592616446	0.152651479879772	0.11469336728257	0.192716480470866	0	0	0	0.202989022495457
7	42	0.153733806177677	0.177297911394339	0.227843930524961	0.249936467197494	0.253014681444278	0.230701725720195	0.153733806177677	0.116457514132619	0.190000858654386	0.0509358702113279	0	0	0.207098044910668
7	43	0.153605819817301	0.176965153791566	0.222773279549136	0.24796633777154	0.255630709830001	0.236496271949075	0.153605819817301	0.115712616146538	0.192403933977137	0.0965242579938976	0	0	1.30577807134013
7	44	0.146242789481763	0.172946311654868	0.226639811986619	0.250463348519228	0.251518067475904	0.237842583100614	0.146242789481763	0.124195369251462	0.190595776073406	0.10222241758062	0	0	0.213334005085862
7	45	0.149087732166872	0.173337107836905	0.222482047785294	0.253040800132733	0.256235271065687	0.235530710559127	0.149087732166872	0.12242524408533	0.19338274565728	0.108822809260822	0	0	0.207260025202525
7	46	0.725692222521227	0.166662777868515	0.222615082809286	0.246731866198599	0.250151647849858	0.231107398019222	0.725692222521227	0.114206226751895	0.191198961710867	0.108377587514902	0	0	0.104168836850767
7	47	0.165331887230426	0.167395186793955	0.221883680070149	0.248334552136829	0.252925729392222	0.234276439352618	0.165331887230426	0.123434781165665	0.187120309660114	0.100979297224483	0	0	1.19811149176642
7	48	0.755413626450225	0.168845566521203	0.218866789712473	0.24407843379791	0.250496506612502	0.23514391061499	0.755413626450225	0.127363711276655	0.19065759901082	0.103599030313076	0	0	0.207930026673802
8	1	0.2111685745622	0.222712671692006	0.24411521733109	0.248325070905689	0.24812618727942	0	0.269102504165402	0.242696205473195	0.243785805143352	0.255319533780091	0.257628255632407	0.121863091691009	0
8	2	0.206749150830293	0.222927575762785	0.24805817108698	0.241069536828382	0.242429950767128	0.0540282665084719	0.249755503126636	0.246248484712347	0.246761299138644	0.25482176738255	0.254671125246596	0.125708682698714	0.0540282665084719
8	3	0.20728830659995	0.223475315472741	0.247889876018242	0.240625568099044	0.240206248819169	0.14381226172106	0.248378270274187	0.524587485878374	0.247735076448524	0.253321613383082	0.260165380082414	0.244293308317698	0.14381226172106
8	4	0.204598695560853	0.224617105725529	0.245376778141394	0.240103933633417	0.236311406754708	0.188985088603728	0.250650131425959	0.264956831570932	0.256268174540436	0.254846351493044	0.260005751855735	0.0851405841325196	0.188985088603728
8	5	0.203530896010856	0.225333612590036	0.245308297710399	0.240449259189348	0.239077325723581	0	0.251044048080601	0.24475823008056	0.255058437204434	0.261594389809261	0.247639404030409	0.0846809602482168	0
8	6	0.209928702767254	0.22343458385755	0.246919295531584	0.232504558194157	0.238775095310681	0.0656703597487977	0.24769134645486	0.245668065306679	0.252661888728082	0.254669412936642	0.257741929392042	0.194680026364804	0.0656703597487977
8	7	0.208761314379676	0.225881338596655	0.24905345382905	0.235281563016326	0.234056203873218	0.180869665889305	0.252120742314571	0.244523600916634	0.252478506741314	0.254383078114815	0.254346159092971	0.130882857225126	0.180869665889305
8	8	0.203299602588819	0.222328539840677	0.246806315159536	0.239438926147006	0.238302162297736	0.263841735023139	0.250022196309235	0.247028273521119	0.254135694858838	0.254118163198957	0.255823417735121	0.179964844607639	0.263841735023139
8	9	0.202184273351725	0.223894766468148	0.247633416984527	0.241404774362379	0.242742977873937	0	0.251131611118355	0.243914575104911	0.250225667667059	0.25894605454395	0.252428702450885	0.135484648911855	0
8	10	0.202911293251502	0.22215712902268	0.249645983205167	0.236325218978567	0.2423405770604	0.213213174967158	0.249681303077304	0.2413425507244	0.249563235643586	0.25464353737812	0.248374319792465	0.0957641596886516	0.213213174967158
8	11	0.204217982321486	0.225469036293189	0.254428867543269	0.24292962229808	0.237861578311532	0.267736070790391	0.249386220459979	0.239071705148636	0.245524853769913	0.254883266112779	0.253255516211736	0.123532971813194	0.267736070790391
8	12	0.202958455913223	0.226082370251516	0.246264013269389	0.235679512144196	0.237469352327672	0.259659608761994	0.250287641070115	0.242328060824644	0.24719942965569	0.254668563610825	0.252229832363288	0.129558012839199	0.259659608761994
8	13	0.208259963188911	0.222374291162649	0.247655587200459	0.237619823161558	0.239156306460803	0.186351257242745	0.24663722079265	0.244080233020202	0.246485870908302	0.255481381316154	0.252701007738376	0.266872336280493	0.186351257242745
8	14	0.20472680292365	0.223029836289643	0.24848267191398	0.239027706360485	0.24052587935496	0.265851971908965	0.252313275239257	0.243510764036701	0.248861270646015	0.260636531674988	0.255854501697488	0.0803220593290859	0.265851971908965
8	15	0.203837766550328	0.222588024222371	0.246753173090632	0.238518745712385	0.235858148516054	0.261924722533733	0.25728452652233	0.243596173623916	0.247192652342219	0.254320656963663	0.250863575889038	0.125622204895456	0.261924722533733
8	16	0.204592767630869	0.223198563670809	0.247958775787479	0.238653271067883	0.244946209189671	0.268189215223632	0.253874553404758	0.249648118391172	0.246791417432821	0.254590548816133	0.245049341125354	0.131985497433542	0.268189215223632
8	17	0.205333240019665	0.221678029851464	0.246141115077034	0.23947888652569	0.236049132773962	0.275629218940925	0.257737795246755	0.241763916451412	0.25237750061693	0.255842683073102	0.254110627736269	0.235012103123311	0.275629218940925
8	18	0.206166324595724	0.219080972599918	0.243847435433202	0.238466360533254	0.2403344735005	0.268556980554357	0.252485497964423	0.245732280668066	0.246884260975387	0.251549681422389	0.25539695769472	0.0661718774814455	0.268556980554357
8	19	0.204862571319777	0.217515105875707	0.240313998836465	0.240700589998122	0.244312587592607	0.261472133509917	0.24665090156915	0.244151257865411	0.246576211653746	0.262591950255129	0.247744165253641	0.185129530126975	0.261472133509917
8	20	0.207555820920198	0.210925601734859	0.238351258836152	0.234094501097226	0.243769973062476	0.279176006971985	0.254504855499185	0.237005985979401	0.24808940316947	0.254404406294213	0.258662935928726	0.253205582676686	0.279176006971985
8	21	0.200197384949411	0.216163443265825	0.234704707174978	0.236560370273644	0.240166955522469	0.268206623473532	0.251001139025962	0.244174740603753	0.249057432916764	0.262270320755224	0.254527048020383	0.12728184528128	0.268206623473532
8	22	0.200353611261336	0.213633936927012	0.23886398821763	0.234446387917442	0.23924906379278	0.26086431040913	0.246938356346443	0.244337511528865	0.248608218938554	0.261696017707283	0.252415428707353	0.0834305299006676	0.26086431040913
8	23	0.204638887273714	0.207836977270626	0.23845053799406	0.229539306091089	0.237623965027084	0.259962091828691	0.251775353028473	0.247053288274147	0.24974285001482	0.257825769107808	0.249271206288812	0.0636778816151767	0.259962091828691
8	24	0.208656028751554	0.213916589341767	0.230261563635664	0.239187361335432	0.246842696351693	0.266422262591622	0.250169867732465	0.248829207609449	0.251973162795644	0.261326896392244	0.2582036659871	0	0.266422262591622
8	25	0.208689903010817	0.212125278421827	0.228965665749006	0.240933678265504	0.240995522941651	0.262054948296847	0.242088315228526	0.240883384487572	0.247301868039319	0.262223942206801	0.252214726140989	0.0619873644956212	0.262054948296847
8	26	0.208666868131882	0.20808854429417	0.226471394116385	0.238167751661573	0.243329742339233	0.270095710357672	0.254288672808244	0.245793783473414	0.250954677081076	0.257691986119396	0.252544598086353	0.200373024643433	0.270095710357672
8	27	0.203430423214303	0.209388354768623	0.23358579020967	0.235796466047689	0.244094634554524	0.264290809366865	0.254093129910938	0.239281403843628	0.247927783892554	0.256923525144364	0.256716317283099	0.0873686739619511	0.264290809366865
8	28	0.202968544520724	0.212602836490741	0.233525361077429	0.239277349512365	0.240184956366773	0.267878110829414	0.251438516604026	0.243001402057397	0.246830934879003	0.256582934505607	0.255143728540924	0	0.267878110829414
8	29	0.200402141776682	0.209457422069696	0.231326276309581	0.235634196354841	0.240402826668583	0.269620892198255	0.249309372750474	0.243380078798522	0.248117544728797	0.256804859912555	0.257361595331999	0.0516956429361264	0.269620892198255
8	30	0.199747127373401	0.212583325343909	0.232811141016487	0.239386225627806	0.239858376904343	0.266850302105458	0.252317594824136	0.24270222796882	0.247187896966433	0.25822604872155	0.253487955887599	0.123904222036366	0.266850302105458
8	31	0.200631777625779	0.209140992381253	0.226816052806912	0.237297043373924	0.238910398517657	0.264879380643075	0.249947734084224	0.251597503541638	0.248294232717089	0.262158374248336	0.257637674441128	0.0839142295876536	0.264879380643075
8	32	0.19650485510047	0.209459797015373	0.233814514630268	0.238239749108926	0.238871585647878	0.264961747083128	0.248682879436201	0.242915458640975	0.250042276415863	0.256626234041207	0.25907244141949	0.0870661493776515	0.264961747083128
8	33	0.200093574405406	0.211108914919023	0.241439707263918	0.242668027923176	0.240451458916839	0.27172850587063	0.256468414474595	0.243199883568232	0.247619955817205	0.260390453091856	0.253266293875172	0	0.27172850587063
8	34	0.20283947607669	0.207300178224937	0.235441526489194	0.239946885274756	0.244669954128774	0.260318480605663	0.249215261877481	0.241645373089685	0.250370990030956	0.259505650744745	0.254805032913609	0	0.260318480605663
8	35	0.196602526613335	0.214022964891498	0.23877868914938	0.238050356813125	0.237121415482387	0.266587044790422	0.246897721728424	0.242282126417675	0.249155464418424	0.262260122856403	0.257238797820655	0	0.266587044790422
8	36	0.20302293684212	0.21323447254874	0.240805836070955	0.239726961124782	0.235926399831009	0.265486899578395	0.248970926486344	0.241694900141413	0.248238170429013	0.262478259124677	0.257492808009541	0.0287640821755311	0.265486899578395
8	37	0.201410241038936	0.21080631194806	0.235683455106843	0.241709026135786	0.236417904072123	0.265829947179355	0.250038503076114	0.241124807749195	0.24628050981284	0.26231578401923	0.256277525711824	0.0686368649974638	0.265829947179355
8	38	0.201011778199954	0.208394689847373	0.240370539722236	0.242075801131939	0.242383936385044	0.267372188322799	0.246240705362492	0.24086915934478	0.250519287586709	0.262319797964036	0.256032091262166	0.0873425759247174	0.267372188322799
8	39	0.192767716854219	0.214630610231999	0.240212743729523	0.242372958951484	0.243322450827235	0.267298108923914	0.249867763197936	0.239015590302223	0.250506857569564	0.253912516532073	0.254210878097161	0	0.267298108923914
8	40	0.198133872592689	0.21098013014572	0.237000118662092	0.2354384738863	0.24069109999671	0.269210584612811	0.249784739107051	0.240017486225549	0.251414121416472	0.261797314885981	0.254699540961352	0.0558093018479576	0.269210584612811
8	41	0.196792983835188	0.216937044265259	0.240903561029472	0.239411191326823	0.232836161331993	0.268628134051427	0.246515139122323	0.241370456113654	0.246281466892473	0.259860119294275	0.250518576278851	0.0722319454446562	0.268628134051427
8	42	0.198023558046879	0.211113674671544	0.238110407260705	0.235715958458324	0.239176958118706	0.264878267635509	0.245661963326279	0.242843507863551	0.248405165369986	0.256063140053003	0.259088970377819	0	0.264878267635509
8	43	0.190335524857075	0.214655202867769	0.241019826645982	0.240260485265545	0.243460514459447	0.264953791074208	0.247518554763227	0.242622329243786	0.253893406714458	0.257567072830216	0.248996493460565	0.0665077574648309	0.264953791074208
8	44	0.190686665640117	0.21507284458418	0.232944731736451	0.239564166298353	0.237738934741972	0.273638313546765	0.251462008742634	0.245756634546069	0.246488241403896	0.259228786241594	0.261619747483566	0.128597846243271	0.273638313546765
8	45	0.190350069407122	0.214424572885635	0.235084749551264	0.237107073997779	0.239077168896737	0.271966476820436	0.248886154684419	0.240338867703812	0.25416307882364	0.260991411833215	0.252600339879495	0.0874408681129385	0.271966476820436
8	46	0.19468661295912	0.216152547983722	0.235896097039907	0.243534266491306	0.245651746735426	0.269992759455039	0.248896053456975	0.244523205500161	0.251107110359739	0.256158904029519	0.255792620071634	0	0.269992759455039
8	47	0.186202552903739	0.217723687892373	0.237788448950852	0.236332281926367	0.236298440773502	0.269480257183354	0.249626047330626	0.243205998177122	0.248627548520319	0.259061287088553	0.258352280328865	0	0.269480257183354
8	48	0.186980924813988	0.216030801989211	0.233909043025774	0.238529585101926	0.240874013015129	0.267263224783031	0.244449471755591	0.245956205607369	0.248186959730796	0.262425603509049	0.259886677810129	0.0301324895432728	0.267263224783031
9	1	0.15747188339522	0.21169621593014	0.120262557214912	0.157163512918841	0.153536011103724	0.193321888677524	0.15747188339522	0.15925823882684	0.191499344114746	0.135049907693388	0	0	0
9	2	0.183164766249077	0.0810537637720476	0.16874589736537	0.128871293661594	0.186082429910446	0.213792340067256	0.183164766249077	0.153426002638927	0.178890254854754	0.152585329530907	0	0	0
9	3	0.199627096583582	0	0.152307103730465	0.14498102552096	0.177136710805705	0.189412859991214	0.199627096583582	0.144387919888569	0.184430364971503	0.156608901277829	0.037655975758589	0	0
9	4	0.139474248593672	0.0502101293915034	0.167302415846885	0.143938946856301	0.207615215344129	0.222865943091217	0.139474248593672	0.151545398091596	0.174253469207596	0.139272856416649	0	0	0
9	5	0.206040049467197	0.153570907527278	0.160369839582158	0.159386955237714	0.152501094195351	0.200353199568243	0.206040049467197	0.166109645654904	0.180892232896456	0.144007502265184	0	0	0
9	6	0.241179489690648	0.0732187703639705	0.161611083529989	0.141073967902851	0.174422710420785	0.218316180947477	0.241179489690648	0.156354618751731	0.182467767068947	0.148912565986881	0.0363320208996317	0	0
9	7	0.231947291092483	0.0961838111103844	0.159801590345427	0.152944325649072	0.168187525873752	0.21617634908713	0.231947291092483	0.166079575367742	0.190577038542962	0.148175798005444	0	0	0
9	8	0.294836532557454	0.168310332149618	0.198096694085391	0.145440160100528	0.182654527722453	0.212416957995459	0.294836532557454	0.153576581354032	0.174022658675639	0.146248649028105	0	0	0
9	9	0.238619866516199	0.0950933721821457	0.113752054646487	0.156181225822807	0.153604876033185	0.207391498647673	0.238619866516199	0.158219085968341	0.183421148758782	0.138829763955516	0.0334683334342961	0	0
9	10	0.269474602169737	0	0.185919365836327	0.126391091955839	0.181247352111382	0.185397280446269	0.269474602169737	0.150604745815989	0.172948364234704	0.160499474364222	0.0823734085457469	0	0
9	11	0.291319095897266	0.122562924416487	0.158511440351995	0.139678043175742	0.661097815776422	0.217057673180855	0.291319095897266	0.163868878678037	0.182640729247904	0.144869138348802	0.171598180756036	0	0
9	12	0.255364761982553	0.101098332281911	0.158720585107565	0.137881967520524	0.189182900136023	0.195353205258896	0.255364761982553	0.15602542274865	0.18828647673732	0.153996359526061	0	0	0
9	13	0.276532013760435	0.0962090738625921	0.15213853069121	0.188361769344923	0.167409884036356	0.179700602535785	0.276532013760435	0.152304906588811	0.183245798882101	0.148664818441497	0.0984725375739605	0	0
9	14	0.3134139175902	0.172019039067244	0.187720101819383	0.164068101387524	0.156012024961435	0.214067242715993	0.3134139175902	0.154546606620158	0.183511514650271	0.144814832514405	0	0	0
9	15	0.213881187256646	0.122058180959649	0.158040449199865	0.158243312094489	0.178095975921424	0.210006124003367	0.213881187256646	0.158348695517664	0.179919442532031	0.14111338460453	0.11981041041094	0	0
9	16	0.319738495168323	0	0.144928376396385	0.158445906172281	0.178362500142501	0.210686573849642	0.319738495168323	0.170252467383884	0.166112956810632	0.139119151643632	0.125390434465316	0	0
9	17	0.302019952372382	0.0545327335459746	0.616483287470501	0.166189978411922	0.156786769387529	0.19548821700838	0.302019952372382	0.157868417921503	0.172732608794539	0.137862008401311	0.188011912547876	0	0
9	18	0.283723653438241	0.186692554700919	0.169562511763399	0.166379193127195	0.15372530210865	0.21960938950444	0.283723653438241	0.167936254114373	0.193007726083389	0.143834274962369	0.141976886162933	0	0
9	19	0.3732448225948	0.173412662821094	0.579251315972615	0.160113686013193	0.172235647674079	0.193352350876916	0.3732448225948	0.154689808261983	0.17968197238923	0.153761466761384	0.096650574346038	0	0
9	20	0.305155427543652	0.126717979000296	0.125629718966319	0.157841735248901	0.172659344042468	0.200441903022741	0.305155427543652	0.151843141835486	0.177560093957142	0.137512994978025	0.100306335548766	0	0
9	21	0.287007600685922	0.143332854435	0.109749365374295	0.165178553264009	0.163220537060855	0.213974812926357	0.287007600685922	0.16394141389633	0.186021515438285	0.132057791069747	0.140193663526796	0	0
9	22	0.300205225476878	0.1315398315764	0.17222054006272	0.17192233236713	0.152441009442449	0.179864717756065	0.300205225476878	0.154005166993838	0.186305085756231	0.158187800556821	0	0	0
9	23	0.333213035871404	0.0848298736883179	0.188148901951263	0.166897785001568	0.19056886619029	0.687784103938963	0.333213035871404	0.162724926529696	0.17057715005295	0.152912895191756	0.0509343654673152	0	0
9	24	0.367976953941509	0.124373313964262	0.132649920940647	0.16830654965784	0.15513713346913	0.234125956502084	0.367976953941509	0.150834667092113	0.179097046736798	0.141509567461856	0.0679538484642769	0	0
9	25	0.331453148500307	0.0965219288170081	0.216094265225889	0.158003343350745	0.191116199781199	0.198824363180627	0.331453148500307	0.17011144994072	0.1760035283733	0.146379243106325	0.0693822413378007	0	0
9	26	0.38758424523812	0.0968498614078485	0.143125605600218	0.161227991361872	0.156020304483589	0.197872050316307	0.38758424523812	0.176929146953811	0.170006443244199	0.148665725117075	0.118592590572126	0	0
9	27	0.326060979806162	0	0.182555331478003	0.162116174728749	0.196633400547561	0.196225752097537	0.326060979806162	0.155314515468477	0.175415166075148	0.140676123490633	0	0	0
9	28	0.350136172190156	0.0716803229628632	0.165177338253852	0.147620650357536	0.186832424393588	0.178513385772236	0.350136172190156	0.164420409834313	0.170994849991528	0.141349748750822	0.0811646807022044	0	0
9	29	0.314322172078815	0.0510758619562463	0.174125324961387	0.197762456728709	0.176403483627342	0.207901922670041	0.314322172078815	0.149761937592671	0.174088645938513	0.146459695496405	0.0567359469314646	0	0
9	30	0.335763061940702	0	0.150504103531765	0.160620896136104	0.155360369691167	0.146204387886089	0.335763061940702	0.166337593671738	0.166446082242456	0.160128102481987	0	0	0
9	31	0.324288526334794	0	0.178520104041517	0.135055628457176	0.140732484434988	0.671424070717356	0.324288526334794	0.176542139726041	0.178908098272668	0.167849392839015	0	0	0
9	32	0.321132306985978	0.0425140423882008	0.155763621098108	0.135126735365099	0.127217884799116	0.651341405562866	0.321132306985978	0.172093500547619	0.170902814685854	0.138249293891731	0.0433322875807931	0	0
9	33	0.310320569583933	0	0.192823219596972	0.143618504216246	0.141697348711162	0.208710751944007	0.310320569583933	0.163351183643755	0.176788078826268	0.764242772378509	0	0	0
9	34	0.389038615154483	0	0.191373542945845	0.158714035399579	0.128826136246521	0.195730112034536	0.389038615154483	0.172374563030483	0.174653919932866	0.170742333838464	0	0	0.0648059365172888
9	35	0.364741028635965	0	0.198713019770099	0.152388963083869	0.179591387910985	0.195746122425149	0.364741028635965	0.16412066081914	0.164395665780936	0.175936860941756	0	0	0.289346281987724
9	36	0.35672524486383	0	0.196075015858769	0.892104988826026	0.185513621094921	0.196520218417076	0.35672524486383	0.178747600808753	0.162201528911612	0.135029301358395	0	0	0.291399693602529
9	37	0.33501694789906	0.0205609605751805	0.139593058316396	0.153739918791785	0.136948593606418	0.218395216416619	0.33501694789906	0.17220043881246	0.160445973766224	0.173577305721835	0	0	0.251591502256201
9	38	0.357359991197633	0	0.206704229656761	0.214828309215276	0.178873687104361	0.182947894614011	0.357359991197633	0.162582591956715	0.168095500563871	0.669135233461596	0	0	0.263408381526145
9	39	0.392839959348735	0	0.18071764464438	0.1468281861455	0.127148653305039	0.20716007080239	0.392839959348735	0.172565372587371	0.166438368704262	0.126673836405807	0.013931688196001	0	0.179855642379702
9	40	0.401313292892816	0	0.177980423049576	0.141024628541129	0.154472941475491	0.203461940127218	0.401313292892816	0.166920191936354	0.153284990459878	0.205249607598571	0	0	0.183412838626676
9	41	0.477788635596013	0	0.20297833377015	0.137897100096278	0.1857365475662	0.212140114415484	0.477788635596013	0.174153830078108	0.140440956515267	0.207784393434624	0	0	0.179186914611845
9	42	0.33182582840757	0	0.196638762364513	0.135916286440855	0.162796884259379	0.197313471364092	0.33182582840757	0.168755536421803	0.162523199906229	0.163279238772311	0	0	0.181984283837248
9	43	0.306814983462012	0	0.234465409039813	0.169176446511658	0.181805664747975	0.193349380449413	0.306814983462012	0.171034262514763	0.149988225924265	0.130929125445814	0	0	0.186712415889055
9	44	0.398944539295496	0	0.198032839504485	0.136604743736331	0.134908525274437	0.207377674349633	0.398944539295496	0.183839077632617	0.150999131592926	0.173792407249438	0	0	0.188481873051176
9	45	0.406935806316184	0	0.198361349226348	0.159137348949761	0.179333514245823	0.187155718199145	0.406935806316184	0.168300868095878	0.162464916871993	0.189212245522098	0	0	0.186042489369184
9	46	0.259442249788731	0	0.18674242978922	0.153706871773116	0.146142638137674	0.217680730600601	0.259442249788731	0.175617186359314	0.154715177094728	0.190224314699447	0	0	0.185980157108543
9	47	0.246839459667793	0	0.201492657607556	0.640999810931292	0.139130693184821	0.214809411182576	0.246839459667793	0.183585196147146	0.157185919334617	0.168636907873658	0	0	0.214574675591217
9	48	0.267343285352285	0	0.144988787615111	0.164442580761861	0.827923530102381	0.194525142297702	0.267343285352285	0.179349914410211	0.161476280749121	0.127280549241026	0	0	0.213026998755494
10	1	0.17074549189215	0.178934089628085	0.166486860856941	0.177209761422498	0.17046316546689	0.160688518162623	0.17074549189215	0.143613369830278	0.182172590312062	0.208564045328268	0.309181555567139	0.410643889618923	0.154032889102481
10	2	0.176251505796914	0.174877750961692	0.165455304797476	0.18120630185374	0.167670651006587	0.153391422763093	0.176251505796914	0.139619954483895	0.183891002194961	0.220096218734766	0.339115678665507	0	0.276023385539135
10	3	0.168758208492411	0.17825279477149	0.166206551529848	0.175058978480508	0.170123888265363	0.160838677198383	0.168758208492411	0.145648047151623	0.182354975425938	0.213190687972166	0.302646889759892	0	0.272304720441957
10	4	0.175575976992524	0.18295297495607	0.167121110604827	0.173146779869118	0.171021442668482	0.160116086048802	0.175575976992524	0.136730633814853	0.182328041288978	0.210216911759662	0.341892834844964	0	0.314789924133027
10	5	0.1717383758803	0.176692493219426	0.166871143906266	0.176047039769026	0.171064864585733	0.152557861382876	0.1717383758803	0.143310965622354	0.18767011832085	0.211997356474322	0.337269559178026	0	0.438581688418672
10	6	0.178850926768172	0.177211509243109	0.166220641279234	0.172979561532444	0.169726353626557	0.158170921675784	0.178850926768172	0.141935373985517	0.185142176178948	0.213569486855507	0.382543288045456	0	0.32886976118048
10	7	0.172948740660825	0.176303372659694	0.165661088529198	0.173490839739411	0.175122147698019	0.157721953944109	0.172948740660825	0.146276031648282	0.180284452809643	0.214512079011566	0.316358176410452	0	0.321823003774008
10	8	0.167816489312607	0.178664152218534	0.166768203607252	0.173596343366623	0.173600802646223	0.149431264606906	0.167816489312607	0.139627790163726	0.186393844342114	0.213815286598017	0.323239644418476	0	0.29075974398429
10	9	0.161443092847208	0.179680982868996	0.168397512431946	0.173916807735944	0.169517556378942	0.15964155801802	0.161443092847208	0.141862484182333	0.189547404347847	0.211779078733214	0.31008360433765	0	0.488042992641243
10	10	0.170382671906329	0.179221747483727	0.169737458443996	0.173555929837668	0.169278267188042	0.157438414028392	0.170382671906329	0.142795754620038	0.188135926773863	0.21560070592339	0.318163389423475	0.0108101703812574	0.339934386928145
10	11	0.165819879813751	0.182600576148189	0.165334919848597	0.167871757043168	0.178925765489156	0.162920381750427	0.165819879813751	0.145689768207579	0.190180519185764	0.218349590386665	0.368031645106153	0	0.479166783755389
10	12	0.172662833332927	0.177510195326767	0.168852683059117	0.1766481716031	0.178246227783008	0.163384543495416	0.172662833332927	0.141750271212482	0.187846799768942	0.207380376010234	0.347558165505414	0	0.531262578909102
10	13	0.171819830018723	0.178941048763666	0.166137794686913	0.177751105286458	0.173486532530295	0.156421057937126	0.171819830018723	0.136755877083818	0.187481646102341	0.210383985402901	0.191459051124814	0	0.48105503863424
10	14	0.172304172000917	0.180957693462677	0.16972689999036	0.171447237290055	0.174981668859978	0.15980012561246	0.172304172000917	0.144611277655099	0.187922098953745	0.217539091578467	0.327787127213864	0	0.357892637823004
10	15	0.169458635183155	0.178575574075826	0.170375032577792	0.172522381999569	0.171271002106633	0.166088402212962	0.169458635183155	0.141495204074151	0.187732436222598	0.218614372544511	0.290110068100271	0	0.342035800377015
10	16	0.173229261884246	0.179630858986331	0.168140700137876	0.179380241266425	0.170414207709312	0.160668633024413	0.173229261884246	0.145476552089334	0.187828891203389	0.220333287111157	0.196817575871474	0	0.351018082454335
10	17	0.174858419079784	0.174607529354076	0.165783541989293	0.173244397071455	0.175803562105384	0.159759721379046	0.174858419079784	0.142190404542988	0.18927604797119	0.201366079671332	0.325111119728582	0	0.331196832122633
10	18	0.170067159521295	0.178192204284938	0.172898361961582	0.173028487944434	0.174797757492308	0.157634490723738	0.170067159521295	0.146309204019407	0.185253455689329	0.209671801082655	0.300198192467258	0	0.500274243813566
10	19	0.182905101616941	0.171398992859518	0.165252927868749	0.172201912336881	0.172241551551896	0.164585403926262	0.182905101616941	0.149922417815461	0.187234554044107	0.200604675024966	0.328365912107603	0	0.378227669408209
10	20	0.169986823615403	0.174136403361933	0.166776202976764	0.169520832415096	0.171614361577329	0.161176459211074	0.169986823615403	0.149540983949766	0.192151579611321	0.210714959856915	0.313189526482114	0	0.332980006509378
10	21	0.19337267463584	0.169924960850673	0.164132106013906	0.164482753383917	0.169896475926385	0.16723073412537	0.19337267463584	0.146990107832787	0.191442654966449	0.205258520104055	0.279432432182166	0	0.304187067796214
10	22	0.186454173570351	0.173170040051176	0.167604694272277	0.175057841207226	0.184749996305	0.169267788229263	0.186454173570351	0.154091277509146	0.190543946062919	0.200479065430179	0.276640173244061	0.00830806366535651	0.299562130151838
10	23	0.181625822138553	0.168890104897644	0.168567401446357	0.161949351959668	0.167393259146155	0.162439186829431	0.181625822138553	0.150088985625193	0.189077557183371	0.206411771695467	0.130472506181135	0.0944394076760351	0.36830212528865
10	24	0.171976439227826	0.169163581764033	0.167132499182465	0.171639722910318	0.168630274332026	0.161966652371572	0.171976439227826	0.150642565864695	0.193194902745686	0.215839808751079	0.28958927348637	0	0.307835408826034
10	25	0.188995914417181	0.170304604119177	0.161552193474907	0.166083188776723	0.17321334239326	0.160581286248812	0.188995914417181	0.148192396597674	0.189082755926825	0.209563795305676	0.338884663103573	0	0.346274204628847
10	26	0.160649449324381	0.163573224371756	0.17232231484399	0.168431832268844	0.169380997145931	0.161519054402848	0.160649449324381	0.149329064513143	0.187417897017745	0.205443274380727	0.316334067424673	0.0369563353506565	0.269279462523939
10	27	0.175820466205549	0.166111080636196	0.173833410828006	0.16709446936617	0.167738214115644	0.160271543901349	0.175820466205549	0.151540655768751	0.189012994264136	0.202823391740309	0.217909844534938	0	0.331302917925301
10	28	0.186961843194735	0.165576491226783	0.16755835638657	0.166943455053987	0.172190435084107	0.162819512941709	0.186961843194735	0.154981332498501	0.18891979023703	0.207614035319968	0.303203709084233	0	0.313739927899353
10	29	0.18125736075763	0.159587625575512	0.170266789394892	0.164354743277891	0.178844165924462	0.163969467823782	0.18125736075763	0.15944900200525	0.189771881132344	0.211009150155917	0.30248123390699	0	0.323551430410337
10	30	0.162836281315967	0.15978305865243	0.171303185203747	0.16904969309138	0.167424407070933	0.160765104434143	0.162836281315967	0.156763400135443	0.186407602209345	0.208406470029581	0.293595846644875	0	0.333213864973354
10	31	0.178296793268363	0.155581001692721	0.171452764513792	0.162502702115789	0.169645607144167	0.161353562767342	0.178296793268363	0.150380808798858	0.184982226149713	0.208647902391876	0.302579489977383	0	0.323063075772605
10	32	0.175605267455602	0.158479204135509	0.178764877706948	0.161863109131345	0.171518937405879	0.157192826598253	0.175605267455602	0.151426360603706	0.18945062401341	0.21275669428558	0.337084687546834	0	0.321170241469653
10	33	0.164121739804382	0.150288930468826	0.173422345691394	0.168125829141049	0.167687867963947	0.162208632743435	0.164121739804382	0.150496734470923	0.186208296324434	0.222408801311581	0.199673815619057	0	0.327046562218352
10	34	0.177257413263724	0.156477464323664	0.173075837920496	0.164109239411246	0.166441016299115	0.166005803000679	0.177257413263724	0.153957239916185	0.190011165508478	0.214780015850274	0.286051564195979	0	0.314574992702655
10	35	0.166436152595322	0.14670005559932	0.174420878033606	0.173489427554284	0.172053370955671	0.160800520417101	0.166436152595322	0.148553681357641	0.190241143081518	0.215990029093162	0.264146508540978	0	0.316225719616245
10	36	0.163527724488407	0.15482936331326	0.17727793279748	0.169696706111497	0.173897257313621	0.165107774099544	0.163527724488407	0.148470604305053	0.185690121258813	0.220700128428459	0.241342779245425	0	0.308227659265325
10	37	0.165845523249701	0.154903015464642	0.17393906251354	0.165653353345984	0.168690103408471	0.162882258544432	0.165845523249701	0.149426745526931	0.186518017504817	0.219078925663125	0.251343171170854	0	0.311318057607464
10	38	0.168941748884985	0.155166260648284	0.176016844864304	0.167667642492346	0.170383397792321	0.162862772580058	0.168941748884985	0.14611445144982	0.187100483247701	0.227688823147271	0.265484579152933	0	0.296877116977327
10	39	0.161578308878897	0.155059325998206	0.17384205401028	0.166531416803235	0.166382983679494	0.171471880326345	0.161578308878897	0.14782863559308	0.187447984877768	0.224984358237652	0.201567522673299	0	0.296433568622278
10	40	0.166865909519742	0.156965665330366	0.174138969863509	0.167548002487839	0.168292107276699	0.16495007232915	0.166865909519742	0.162028598047556	0.188514206430596	0.221663595564695	0.261058139121025	0	0.262948914980236
10	41	0.164678720051116	0.156145699942071	0.176282561693909	0.172014600599298	0.172187920297598	0.168574292918225	0.164678720051116	0.15148160664952	0.184461770338609	0.232197115775621	0.25417241045687	0	0.291993701765176
10	42	0.166739956566777	0.153206692681163	0.176572943098387	0.171211827745633	0.164181775494557	0.16949640921857	0.166739956566777	0.152530170467718	0.188193260380035	0.232019523132979	0.252520939912371	0	0.288053109990612
10	43	0.153977389960058	0.15292520453048	0.173555957391381	0.169512882816226	0.167393419950364	0.164918355776933	0.153977389960058	0.154624420905029	0.188537279843251	0.206434803553104	0.240028049576917	0.173459443458813	0.248593447931574
10	44	0.152617027909744	0.155567689835362	0.173357094812462	0.172967464803587	0.169755544181713	0.168994424671611	0.152617027909744	0.149829344376755	0.185882694027661	0.213653255507752	0.248542299413937	0.480226633243215	0.273431712080613
10	45	0.15215350462775	0.158100943843914	0.175410749686065	0.177346156642766	0.171653486539792	0.164095293418794	0.15215350462775	0.141954221101729	0.191190374765319	0.22562604789456	0.164123489860703	0	0.24912609327387
10	46	0.145978156711887	0.140414728943407	0.176284748672493	0.167669786461401	0.171752565581987	0.166930533698933	0.145978156711887	0.162715659266901	0.188817240313024	0.236350423182424	0.133823663235427	0.0496044048711526	0.254666231015069
10	47	0.158700182029108	0.144619979311491	0.174827342548427	0.168825749919782	0.171249977680673	0.167370025756175	0.158700182029108	0.152742891984359	0.190691655819205	0.238126146117165	0.173690080420939	0	0.246968187390986
10	48	0.15889618865895	0.149521978235581	0.182115526805585	0.167736827626926	0.169967110399562	0.173962055396477	0.15889618865895	0.153625877971893	0.19005968655604	0.234724115759367	0.231369328866561	0.212527389483111	0.263344071665656
11	1	0.858178974594657	0.267110118871621	0.281090747190541	0.331451828250017	0.327912982152238	0	0.259409616187612	0.241292732250549	0.242018026535092	0.178359308393946	0	0	0
11	2	0.8228174977035	0.273707440460742	0.276290228046564	0.310426009439528	0.356812318656735	0	0.342984582506041	0.338943475573726	0.327811949008415	0.164659775679538	0	0	0
11	3	0.850839943430248	0.285369609423718	0.290012817699785	0.307022152682215	0.341224940979108	0	0.298566220290766	0.277937923500761	0.335398628295458	0.243449745476767	0	0	0
11	4	0.856720790577394	0.263660424227227	0.286189267596716	0.314503470588275	0.320656702709374	0	0.111895999382334	0.26499549819191	0.269215035969872	0.114923638988074	0	0	0
11	5	0.851691843950343	0.268889930705972	0.278359704913074	0.315635571361514	0.349637002979279	0	0.283661647441906	0.320511378844103	0.258092327265689	0.0851856237333963	0	0	0
11	6	0.859147722031671	0.252756363905147	0.286090733303502	0.307980353730145	0.284033441810686	0	0.275712513735807	0.215848003103285	0.311049726762618	0.0824752471164592	0	0	0
11	7	0.842172116741369	0.275902828046026	0.273946281069067	0.318642680627166	0.344686474169644	0	0.267537085284297	0.243145237391499	0.244906215232723	0.176396709142994	0	0	0
11	8	0.850195031009053	0.254981549168706	0.276066688795289	0.315708730975544	0.333631689835214	0	0.32840632780072	0.246415450056664	0.270303400095659	0.14759223103976	0	0	0
11	9	0.826769080892178	0.274754257082651	0.284910972027749	0.312619679835098	0.336022938798129	0	0.331970646670351	0.330394366087515	0.245397402104598	0.119767076988672	0	0	0
11	10	0.830211322826829	0.25310103508903	0.278178187872748	0.305287635335788	0.327249658417149	0	0.233051819939665	0.162460562698405	0.341185573271535	0.174938271866506	0	0	0
11	11	0.845758205234268	0.271604909056436	0.287578926223533	0.302109265694631	0.285447550684279	0	0.295136885356152	0.265921817372618	0.321931157123769	0	0	0	0
11	12	0.849385816981635	0.267677852307197	0.271374266350075	0.318448655361787	0.338159694731808	0	0.337309718564723	0.253425320579582	0.33133036590869	0.191674877776504	0	0	0
11	13	0.859496556933346	0.261054544762496	0.285394298058695	0.313004614353796	0.334090335635171	0	0.250683668577169	0.331695641749483	0.251013103759991	0.17714007351313	0	0	0
11	14	0.824674789584833	0.258923820792065	0.272623313220547	0.319004494667613	0.342929270359468	0.00729442859567734	0.329396008514616	0.334455658571946	0.325646086980694	0.172402200541688	0	0	0.00729442859567734
11	15	0.844168463267462	0.280380650610839	0.284314608464091	0.324934480365512	0.353679246073821	0	0.257401590099272	0.248771944423632	0.246276973076528	0.143154488800038	0	0	0
11	16	0.828873746905752	0.2567947499368	0.279685926945538	0.315326372052449	0.328158622489179	0	0.260969711143984	0.28210385537873	0.332836918825855	0.164811167604717	0	0	0
11	17	0.83576557867384	0.272987734559152	0.279526845285049	0.302794865332147	0.371335416057509	0.0315720347544958	0.287785436855811	0.333769569557113	0.294997437706478	0.141404836046983	0	0	0.0315720347544958
11	18	0.77861466856737	0.236659343518585	0.289725635443685	0.322206937148181	0.341704194703151	0	0.327645788989678	0.229902009371277	0.335196221102636	0.240827718982621	0	0	0
11	19	0.778743299762454	0.539609837091498	0.282375495040323	0.312319253687039	0.343107994077087	0.0763884167660354	0.327241099914606	0.290834026478817	0.297027859528424	0.0839051469095218	0	0	0.0763884167660354
11	20	0.809210349050826	0.275925683244058	0.277660019800039	0.329090542643754	0.344937074703908	0.0641883955083529	0.270835201361757	0.244434959476714	0.342117711139547	0.110329974888898	0	0	0.0641883955083529
11	21	0.792811066744014	0.244819979332561	0.282531728206766	0.307518165408478	0.339547560524813	0.100853218226193	0.287588491007085	0.25377650302599	0.331818064412044	0.178265455419503	0	0	0.100853218226193
11	22	0.765185216390529	0.26064956289119	0.274835582777775	0.31157839094786	0.333181113725843	0.0995489437359328	0.333285642866935	0.295495726353361	0.348117553468574	0.166660833537493	0	0	0.0995489437359328
11	23	0.829296786062406	0.254355115418023	0.275724346754506	0.322663404464021	0.294333682265699	0.145726497594784	0.241527103265143	0.351909794156415	0.340115607109046	0.172429549596773	0	0	0.145726497594784
11	24	0.773796206875106	0.250070559100268	0.291234507309385	0.315088914483402	0.345919734726057	0.142183532910686	0.328409495789707	0.331984785973974	0.340252100514207	0.0850512263536328	0	0	0.142183532910686
11	25	0.782761408809517	0.541637708599778	0.288666323259921	0.328053647034993	0.324183399946459	0.127635513815906	0.25584507612196	0.238468354343221	0.321279610311461	0.227610925430637	0	0	0.127635513815906
11	26	0.822452567007583	0.299595546977604	0.282784522246883	0.330411497300511	0.353085886442245	0.371417728594794	0.230940325926145	0.257438459146671	0.27467938322712	0.145865355951313	0	0	0.371417728594794
11	27	0.822842461591171	0.550355672137857	0.278083668886371	0.315569369596168	0.340130747903179	0.180582994138276	0.332312609144068	0.276981210592777	0.351631579496826	0.116636030269383	0	0	0.180582994138276
11	28	0.823709233725	0.501680049469186	0.282768896369219	0.311767615582295	0.335520351648119	0.276687344915465	0.343840434713761	0.260299258552244	0.260506924930409	0.114507007256309	0	0	0.276687344915465
11	29	0.810121527821917	0.323630328613994	0.279031577777117	0.644968567744828	0.293157521716062	0.280179488771361	0.330531855477722	0.242615586163032	0.289917474588768	0.0861848302632858	0	0	0.280179488771361
11	30	0.841611408357712	0.226834421479242	0.289131123081339	0.338229164392225	0.344454175393563	0.363427466214961	0.328423417284322	0.241344283504329	0.237012493997408	0	0	0	0.363427466214961
11	31	0.857274783960066	0.289741969743926	0.285893971770584	0.305927691130838	0.287473249455183	0.364204271840301	0.320455563283644	0.291381733663514	0.343712099412808	0	0	0	0.364204271840301
11	32	0.788400821996442	0.225217877116004	0.286924568814927	0.595820175839532	0.333989382428179	0.306597798993307	0.241559172760868	0.301626649210128	0.236312455093152	0.0386279655654864	0	0	0.306597798993307
11	33	0.860418861741425	0.325053761227144	0.279065297387721	0.306159186968673	0.350113222064716	0.367925551106669	0.339416835030735	0.254230409442428	0.33198111811358	0.0833175724258827	0	0	0.367925551106669
11	34	0.811010105024559	0.650520833941022	0.291631197218933	0.309422041344618	0.279215718981046	0.355805089091417	0.27902341319948	0.284589339346558	0.262584153378247	0.117600986907482	0	0	0.355805089091417
11	35	0.896576925314299	0.509022296741552	0.284920745775824	0.302037729136132	0.240441236558534	0.362027968219754	0.320561221822028	0.225460522823504	0.330879830362534	0.175566492597362	0	0	0.362027968219754
11	36	0.88925577245584	0.191752523782324	0.282842196759611	0.312393006926447	0.348466664142063	0.367363208840961	0.337736485850508	0.282296442705052	0.334697520374116	0.115148074666617	0	0	0.367363208840961
11	37	0.866753217464164	0.322350880724083	0.262698288892924	0.315424419388572	0.353738534754259	0.366254157521417	0.242459013742652	0.276780184077057	0.249579677757913	0	0	0	0.366254157521417
11	38	0.892717500939695	0.368418977465779	0.27651208942388	0.292898588714999	0.333688854937405	0.382879388216423	0.249975195461377	0.263731795698262	0.228734645192324	0.0404010205297786	0	0	0.382879388216423
11	39	0.861231897223885	0.358094660736791	0.271115643379981	0.325212151816308	0.323591255385246	0.378756774682192	0.20816000498177	0.297309139043276	0.221224260369493	0	0	0	0.378756774682192
11	40	0.894936948911449	0.266771985522429	0.277894417368797	0.3013464324567	0.357307514536374	0.384522572331202	0.33148201832673	0.283281144410341	0.115178711288435	0.0606042975719495	0	0	0.384522572331202
11	41	0.925038773597748	0.20634213176183	0.276793881786107	0.305227535429189	0.336059487718849	0.375651667595455	0.162454756350357	0.261311031876625	0.287329852687097	0	0	0	0.375651667595455
11	42	0.933372971258071	0.331874101152306	0.274664164858508	0.29991045164398	0.366130473067161	0.382921208493889	0.165775016321076	0.318856658341364	0.11349179057133	0	0	0	0.382921208493889
11	43	0.90225584815504	0.328014498215667	0.279408310626517	0.300518504011032	0.357495503675772	0.374347392582984	0.271793731732676	0.145872201493929	0.246053424883591	0.23717882407219	0	0	0.374347392582984
11	44	0.86761881590787	0.225248269924574	0.281489573513507	0.306871309514248	0.235189099537947	0.397515898191528	0.337188466460372	0.261895152097622	0.29160841369331	0.112060889404867	0	0	0.397515898191528
11	45	0.92539028793024	0.181770844787594	0.277369359793333	0.300744942518259	0.230645658347778	0.415765598613705	0.329717606129147	0.286777781186344	0.239134178126513	0	0	0	0.415765598613705
11	46	0.846119532574026	0.224757471421012	0.271355769073988	0.300917094070715	0.341511868333277	0.405495501487539	0.27670553001338	0.259427086389851	0	0	0	0	0.405495501487539
11	47	0.919612659234923	0.337985586144637	0.26466844141611	0.301235861485602	0.357264955362769	0.396129545195922	0.267694666923841	0.343747674081472	0.0942601139010338	0.0345455481324849	0	0	0.396129545195922
11	48	0.809539352240186	0.631699967783299	0.263453952516349	0.302572242215947	0.345153833804795	0.408200850618417	0.329360357087253	0.173776564883495	0.247656980200674	0	0	0	0.408200850618417
12	1	0.570174205839627	0.27344607607587	0.294337030591278	0.342808692217674	0.343078777498491	0	0.298645853937137	0.315541383469466	0.254777504717928	0.113878614507224	0	0	0
12	2	0.353714496813433	0.281587059915207	0.296405426938721	0.34591778975583	0.339296995049266	0	0.306892374592298	0.298165854950734	0.284235873254134	0.146292294931118	0	0	0
12	3	0.247663337788194	0.285431071363974	0.299141215350513	0.341067484225483	0.342637423105073	0	0.314142887902115	0.293850132784743	0.277863319392063	0.115916896858304	0	0	0
12	4	0.24406162276193	0.279781821210043	0.308408568665941	0.336134356858943	0.341175662841956	0.0273495297248364	0.30284810221422	0.301073381430549	0.287981571705131	0.112009050331267	0	0	0.0273495297248364
12	5	0.246264658877058	0.286535471480196	0.293767188314866	0.336406361182452	0.338982615388194	0	0.302634374136432	0.299524252025965	0.269746949986643	0.114592560421792	0	0	0
12	6	0.460088375928202	0.277762458390294	0.300347896994531	0.32474109843255	0.341951553002259	0.0527592563477299	0.291131732761045	0.302746132460288	0.27082889251584	0.113352138258748	0	0	0.0527592563477299
12	7	0.660674287344932	0.282589862153516	0.297230311873585	0.334389170185999	0.337417939187675	0.11617113867465	0.298877743868815	0.307925175913003	0.280526442370926	0.109466678343112	0	0	0.11617113867465
12	8	0.246972245498565	0.273557892926752	0.29476892752042	0.32959551919773	0.345891626559406	0.169418589285289	0.300226128082318	0.290646904483635	0.288908425531153	0.115692669365391	0	0	0.169418589285289
12	9	0.678699623310305	0.283388089502754	0.287058762008703	0.335771492441073	0.338817972896951	0.0723667023434512	0.309626514326083	0.304305888530568	0.22557109494665	0.0900967458857321	0	0	0.0723667023434512
12	10	0.25620646965966	0.276033068961815	0.297246102257868	0.335224752661505	0.343434489336437	0.15386409492504	0.312219445819514	0.303074453307295	0.261719152981874	0.110297240032163	0	0	0.15386409492504
12	11	0.629679648947411	0.277646397634086	0.294185629025344	0.327528129070078	0.335130472167881	0.0845274240774679	0.31068548710352	0.307702547303369	0.205670146250302	0.109683398869164	0	0	0.0845274240774679
12	12	0.255644341971658	0.277681179657052	0.289965325555309	0.333669543046565	0.343227055166842	0.170872698131166	0.292923877238822	0.30837109559975	0.277429287671537	0.107006462120248	0	0	0.170872698131166
12	13	0.238817072176246	0.275996023290287	0.293399116418521	0.326807420575933	0.344661459341014	0.169074531501211	0.305817868779148	0.29638941643885	0.266197083833982	0	0	0	0.169074531501211
12	14	0.239383406431624	0.269529026711092	0.291369517550231	0.331685570263516	0.336492915779836	0.156434299158698	0.297880267144709	0.304450573201442	0.218372553955533	0.0461201004311307	0	0	0.156434299158698
12	15	0.543170868481098	0.274089049970254	0.295257978173338	0.323307909521676	0.33877356155281	0.0828661066022739	0.298147759661405	0.304559673953764	0.269451249024167	0	0	0	0.0828661066022739
12	16	0.235942672273909	0.277809980208353	0.288813309945635	0.323674553688108	0.347209780386234	0.160705242651337	0.29364960969009	0.305645876762119	0.228835987555207	0	0	0	0.160705242651337
12	17	0.240149092190503	0.283535860968908	0.283850209545014	0.333374647766797	0.344506374165454	0.16975882496452	0.302918379191508	0.305644166357573	0.21635930839998	0.0398330517136577	0	0	0.16975882496452
12	18	0.378514105963906	0.272353300991899	0.29842811188528	0.326208560369256	0.334447768639099	0.214527083481234	0.318717125423872	0.306032855780516	0.271576374922205	0.111123087710564	0	0	0.214527083481234
12	19	0.241439864230577	0.276463307983249	0.286370442732989	0.334707480348184	0.33974091890842	0.162088477616393	0.306053334606792	0.312755533920618	0.26918922072516	0	0	0	0.162088477616393
12	20	0.233962898002945	0.279828579499463	0.283898240280275	0.329913767440848	0.345500228367456	0.159007554615132	0.299408640270845	0.294023489394067	0.273862914884744	0.0812518923181738	0	0	0.159007554615132
12	21	0.235582844693542	0.26491499674839	0.299625727603465	0.330032446571043	0.346014529685013	0.214094590939598	0.307954071822213	0.30267219346791	0.267476806745962	0	0	0	0.214094590939598
12	22	0.258724740413921	0.274963428318159	0.299599153845916	0.332964685079713	0.338456455778925	0.214364126564625	0.304839227348581	0.294328598655208	0.209438528318356	0	0	0	0.214364126564625
12	23	0.219752181480372	0.264900604051605	0.309927504640897	0.329701284424286	0.339680171390522	0.230596390637367	0.296057010110362	0.298669176507353	0.255469821779349	0.0346702048766417	0	0	0.230596390637367
12	24	0.365929024628635	0.279367459455641	0.307296429100066	0.333189585679639	0.335674596787845	0.278907030844793	0.311960909176961	0.30351885768477	0.215866923225519	0	0	0	0.278907030844793
12	25	0.436474007454249	0.269353908125893	0.298901928393999	0.329835572082668	0.337424280449158	0.242133031514586	0.300233720168106	0.300867925750539	0.21682408198447	0	0	0	0.242133031514586
12	26	0.373520306659106	0.268522466680103	0.314077447321523	0.32929966717745	0.340872226652715	0.279925973012676	0.287627849615156	0.302227396553847	0.162647370456785	0	0	0	0.279925973012676
12	27	0.237792242719827	0.269361310224536	0.303903903462214	0.3304606239086	0.337529854255891	0.246563181020426	0.297402517457173	0.302656180988549	0.258529635297061	0	0	0	0.246563181020426
12	28	0.248127623220123	0.265289819952617	0.315465765464994	0.328593812492468	0.339528304739884	0.236582194259873	0.291363825503079	0.294393947906368	0.23492237911683	0	0	0	0.236582194259873
12	29	0.248798185702299	0.262549506859915	0.306888409284139	0.332009962670892	0.346748848819251	0.285965800794533	0.275271277896707	0.285520520750453	0.209283044478191	0	0	0	0.285965800794533
12	30	0.245956879161781	0.262937056796831	0.307804752101951	0.317529276753383	0.342975301398995	0.298546590117859	0.306377513664478	0.28463659410802	0.219107596586879	0	0	0	0.298546590117859
12	31	0.241823286638024	0.264906710136807	0.306695692618416	0.330765695497902	0.346053552344717	0.289264113699366	0.320122900134658	0.288597750003594	0.208374126226339	0	0	0	0.289264113699366
12	32	0.239050745226048	0.265924472627412	0.315909941179516	0.330366169986993	0.337641024185653	0.289032901129061	0.316328215924553	0.287666629601597	0.210955094841687	0	0	0	0.289032901129061
12	33	0.244543527553144	0.259504584851684	0.307125230205043	0.32568431083496	0.34617724212121	0.298346853816156	0.291138646737334	0.287908614565728	0.16216391528557	0	0	0	0.298346853816156
12	34	0.253191881018414	0.254669488697296	0.299857103746479	0.324904188725617	0.337838359533342	0.290768407379326	0.310807986002562	0.296815593392354	0.207692696550525	0	0	0	0.290768407379326
12	35	0.246088125088169	0.255173295019516	0.304568902802567	0.335029940672503	0.339569553240989	0.303029751104206	0.301145234641198	0.304512834311835	0.155273081707496	0	0	0	0.303029751104206
12	36	0.246079143801882	0.260976731960416	0.309547192221894	0.31546326036647	0.347928247983227	0.292651079401339	0.303968839051549	0.277433705716725	0.212856213634908	0	0	0	0.292651079401339
12	37	0.240643550200615	0.249695122441599	0.300475034617104	0.330813612988112	0.340692233893925	0.292395158757375	0.30947171915446	0.274305575465915	0.15586496482907	0	0	0	0.292395158757375
12	38	0.243674595930743	0.253785246384212	0.306277521990025	0.310199750652384	0.349800333187728	0.30537683147703	0.300353344365019	0.266360605222213	0.162698254134027	0	0	0	0.30537683147703
12	39	0.240220217648701	0.251377387512549	0.301341356191138	0.333287703993642	0.337743479153282	0.30165224946526	0.301920452489171	0.27164821915861	0.158384802675779	0	0	0	0.30165224946526
12	40	0.244991461990994	0.251155812303487	0.304578439019317	0.324849342148586	0.344669814552639	0.308266539277359	0.30091566574796	0.261142197022197	0.211013477724146	0	0	0	0.308266539277359
12	41	0.243007407135974	0.247708545617565	0.307750416576993	0.323121270062978	0.340168295106461	0.318296244961148	0.29805864430606	0.273569980984543	0.157880112158032	0	0	0	0.318296244961148
12	42	0.258317723472624	0.244864273855518	0.30892725961268	0.32215700421794	0.34009824906942	0.314472569519931	0.286184105572284	0.258660134609668	0.206561773056017	0	0	0	0.314472569519931
12	43	0.290905916646682	0.245338086102888	0.302562980897195	0.326099118354907	0.340233195710249	0.313913021508284	0.296773167684187	0.270672373860918	0.167604284856078	0	0	0	0.313913021508284
12	44	0.248384883486449	0.24885541857902	0.30436140860913	0.321047125822021	0.340763196729114	0.307133142314962	0.297112915584267	0.266753058186576	0.155371423155626	0	0	0	0.307133142314962
12	45	0.262871345604343	0.239231472280967	0.306995124796617	0.324034909969061	0.341550492553734	0.311253392671333	0.28374501598726	0.2711890593141	0.154136025450922	0	0	0	0.311253392671333
12	46	0.221423872249836	0.241363165291168	0.307366706089993	0.32303599703713	0.332892780120719	0.306728076566707	0.296254346539931	0.278275028166333	0.161855441732913	0	0	0	0.306728076566707
12	47	0.248298585912728	0.242448252417784	0.306818902232122	0.323209694231737	0.341285737536625	0.311727388437498	0.290653179902434	0.272599659952763	0.161793448012529	0	0	0	0.311727388437498
12	48	0.234250319793579	0.23562304711783	0.307612038236031	0.317544037453705	0.345085729856829	0.31390111032249	0.282062345024993	0.263954482060812	0.165097526533414	0	0	0	0.31390111032249
13	1	0.00676333775858523	0	0	0.145031370285393	0	0	0.00676333775858523	0	0	0	0	0	0
13	2	0	0	0	0.162064842014279	0.0732277243093344	0.06346857004677	0	0	0	0	0	0	0
13	3	0	0	0.049155991623819	0.123930940722592	0.0776535579695458	0	0	0.0339730457854738	0.0419188258704549	0	0	0	0
13	4	0	0.0313325122126299	0.0514883744399352	0.160683612360426	0	0.0534166347947412	0	0	0	0.0332575172797745	0	0	0
13	5	0.0211661265776702	0	0	0.145950269028116	0.0708331680559412	0	0.0211661265776702	0	0.0457172952185195	0	0	0	0.0213525198535729
13	6	0	0	0.0544442278774046	0.150841848355673	0.0708790562311905	0.0589675142067483	0	0.0329647218140091	0	0	0	0	0
13	7	0	0	0	0.160097400100623	0	0	0	0	0.0474757387106254	0.0309497391710731	0	0	0
13	8	0	0	0.0470795606912033	0.146094385738851	0.0649706300266964	0.0537177518905963	0	0	0	0	0	0	0.0351921225952783
13	9	0.0262713218047766	0.0181318665378579	0	0.13520293510233	0.0576678321335541	0.0564888135202586	0.0262713218047766	0.0338523576813031	0	0	0	0	0
13	10	0	0	0.0486759650740216	0.138109719885866	0	0	0	0	0.0410707809732214	0.0289797281005991	0	0	0
13	11	0	0	0	0.131087713410798	0.0733072261865141	0.0594215196221742	0	0	0	0	0	0	0.0304537393994339
13	12	0	0	0.0508176560864307	0.13397318928536	0.0723847219015177	0.066682759439278	0	0.0347878843539403	0.0405311197937777	0	0	0	0
13	13	0.0242035284387829	0	0	0.117495323200124	0.069313807171761	0	0.0242035284387829	0	0	0.0302838597021461	0	0	0
13	14	0	0	0	0.160505657021882	0	0.0554054069028489	0	0	0	0	0	0	0.0386172998552238
13	15	0	0	0.0481991124615431	0.148324753255661	0.0679306753871539	0	0	0.0342774602732805	0.038936549388482	0	0	0	0
13	16	0	0.0148019469888991	0	0.158888290409661	0.0754397002931587	0.0582408129485634	0	0	0	0.0398898561292559	0	0	0.0387990002273623
13	17	0.0232745255895263	0	0.0476712362724717	0.140079685308516	0.0954759667896398	0	0.0232745255895263	0	0	0	0	0	0
13	18	0	0	0	0.133263503257626	0	0.0635171880686774	0	0.0374432407274623	0.0329573884038111	0	0	0	0
13	19	0	0	0.0518933819332153	0.135657784247147	0.0627367134619813	0.0588531983476376	0	0	0	0.0286851529090761	0	0	0.0404480511522234
13	20	0	0	0	0.139844105574506	0	0	0	0	0.0385969245970481	0	0	0	0
13	21	0	0	0.0458274349605586	0.155996749027751	0.0609979632780061	0.0585672460333869	0	0.0336155018559118	0	0	0	0	0.046772356601801
13	22	0.0247068592912244	0	0	0.140207127705546	0.0666564015808232	0	0.0247068592912244	0	0.0544457100047259	0	0	0	0
13	23	0	0	0.0481679790835367	0.157326457118314	0.0695219324316339	0.064338761594649	0	0	0	0	0	0	0.0483721326209086
13	24	0	0	0	0.143038313700976	0	0.0556418932265454	0	0.0340636929743974	0.0431902942770701	0.0244484251913639	0	0	0
13	25	0	0.010742850954975	0.045544806981108	0.101477306629918	0.0613645638053392	0	0	0	0	0	0	0	0.0470709844566902
13	26	0.0234491219710769	0	0	0.125630823773874	0	0.0575244579614138	0.0234491219710769	0	0	0	0	0	0
13	27	0	0	0.0468509596013546	0.147952193687176	0.0635642644247975	0	0	0.0334480601797498	0.0373450367699232	0	0	0	0.0491747977194694
13	28	0	0	0	0.138182736557523	0.0706676823968217	0.0568298060967015	0	0	0	0	0	0	0
13	29	0	0	0.0475864169331505	0.105764145954522	0	0.0611929192449285	0	0.0388422070297403	0	0	0	0	0.0525012101528943
13	30	0.0251777042365012	0	0	0.137993083786641	0.0603962477019228	0	0.0251777042365012	0	0.031106850163902	0	0	0	0
13	31	0	0	0	0.138280689964996	0.0666045468259935	0.0582222307614826	0	0	0	0	0	0	0.0624898063503391
13	32	0	0	0.0363578323314933	0.136081638096327	0	0	0	0.0391595269059236	0	0	0	0	0
13	33	0	0	0	0.158928084390804	0.057194004924404	0.0598296888078396	0	0	0.0340851727112744	0	0	0	0.0508738602983446
13	34	0.0258508349948958	0	0.0402022494766672	0.170089722328528	0	0	0.0258508349948958	0	0	0	0	0	0
13	35	0	0	0	0.153117807552622	0.0548392633770786	0.0532536374897088	0	0.0360843305238073	0	0	0	0	0.0488120370483361
13	36	0	0	0	0.136025180981504	0	0	0	0	0.0386989715361324	0	0	0	0
13	37	0.0288029715449683	0	0.0355190325183847	0.159085022166719	0.0548160565000057	0.0513188692810894	0.0288029715449683	0	0	0	0	0	0.05777591610937
13	38	0	0	0	0.17964514253895	0.0583234232116727	0.0585850881031846	0	0.032005172035801	0	0	0	0	0.0550617738040307
13	39	0	0	0	0.156446535960801	0	0	0	0	0.029388858683673	0	0	0	0
13	40	0.0304036849266131	0	0.0403401318557549	0.173780403018208	0.0502671447407246	0.0544939528060573	0.0304036849266131	0.0373480355120061	0	0	0	0	0.0582425089940996
13	41	0	0	0	0.162419550431114	0	0	0	0	0	0	0	0	0
13	42	0	0	0.0369902238537377	0.167343851452211	0.0488107028204288	0.0599559563544619	0	0	0.0376697351177236	0	0	0	0.0614733943149405
13	43	0.0348467873875538	0	0	0.176463846670665	0	0	0.0348467873875538	0.0348100814172994	0	0	0	0	0.0589795476622569
13	44	0	0	0	0.160943593412091	0.0589215818559239	0.0581399067087058	0	0	0	0	0	0	0
13	45	0	0	0	0.171107476027844	0	0.0630351685812547	0	0	0.0353489542718857	0	0	0	0.0634232442384742
13	46	0	0	0.0290143113090532	0.136619966857958	0.0661286877489332	0.0808732368623449	0	0	0	0	0	0	0
13	47	0.0287100653756899	0	0	0.177689643714495	0.0651030222776031	0	0.0287100653756899	0.0315872531535135	0.0360488057571385	0	0	0	0.0613435965259892
13	48	0	0	0	0.163596368483624	0	0.0648035641960309	0	0	0	0	0	0	0.0614809909997979
14	1	0.123935702157721	0.100817021139313	0.106032282588757	0	0	0	0.123935702157721	0	0	0	0	0	0
14	2	0.13933553669262	0.0998873270950368	0.10883429760521	0.0902388622684245	0.0904584433911061	0.0703555983004902	0.13933553669262	0.0703471844594628	0.0658232514053264	0.0733315244890626	0.0512338914241126	0	0
14	3	0.140063325850359	0.117480650936791	0.110589741916719	0.0916026898213839	0.0825905006058013	0.0728195814767374	0.140063325850359	0	0.0719792642135654	0.0999198642688564	0	0.0488197102745475	0
14	4	0.211657681798074	0	0.114156423981525	0.0708327666712	0.0639645482887564	0	0.211657681798074	0.040697572674673	0	0.0880413442152435	0	0	0
14	5	0.174451278826657	0.0950912683686615	0.102393027444403	0.0877701125212842	0	0.0670366194237264	0.174451278826657	0	0.0829957481278234	0.152286041918256	0.0329197190104464	0	0
14	6	0.102372272674691	0.11015763557651	0.0994511292178467	0	0.060768404318932	0.086194784698357	0.102372272674691	0.0599853395830059	0.0631825292724658	0.157969332727926	0	0	0
14	7	0.165972652092288	0.106537458037559	0.121957763587315	0.0612833718601464	0	0.0743013260557661	0.165972652092288	0	0	0.154518008700749	0	0	0.0160719328283211
14	8	0.170678389257173	0.103341442191831	0.112875989922431	0.0687181319663006	0.0647782930531111	0	0.170678389257173	0.0618611674563245	0.0707285607586628	0	0.0439380245376292	0	0
14	9	0.192192746261371	0.0918599246381178	0.107329879457813	0	0.0692330432699597	0.0684570466260945	0.192192746261371	0.114555016765127	0.0679447989275593	0.12349977113998	0	0	0
14	10	0.18300304334061	0.100308750333527	0.116767507894505	0.0837116401872797	0.098577429120364	0.0725568301372049	0.18300304334061	0.0644886277529389	0	0.15592208631912	0.0431608410321484	0	0
14	11	0.119767519711351	0.118393494987811	0.109095153884169	0.084374799609851	0	0.0759169438267758	0.119767519711351	0	0.0624407983180947	0.15189327371016	0	0	0
14	12	0.102757708626407	0.100696619211707	0	0.0570328326611063	0.0594222258139656	0.0995915749511254	0.102757708626407	0.0948778777939142	0.0625496879083322	0.0849587355421472	0.0426285624156754	0	0.0898640608839151
14	13	0.160936679340831	0.102863091282764	0.0702472633422383	0	0.0955747915752733	0	0.160936679340831	0	0.0853131675755363	0.154863487835473	0	0	0.106129960381686
14	14	0.210395649017978	0.100745313831727	0.100561232237115	0.0912091690753488	0.101955090821595	0.0867500566044118	0.210395649017978	0.058161649836624	0	0.140757443957424	0.0566523770487624	0	0.130784431944359
14	15	0.248755360288358	0.0830874636803923	0.106218904415732	0.0820191137342648	0.0588574243637954	0.0760825404264579	0.248755360288358	0	0.0630334600515992	0.13075762179989	0.178816023346221	0	0.130542338143819
14	16	0.157201560697094	0.0938102144313882	0.102116674427534	0.0699305100521611	0	0.100505138827748	0.157201560697094	0.0686108700201373	0.0865322877925439	0.170986352541013	0.306132289203778	0	0.0787871195665448
14	17	0.103561693772214	0.101908439343587	0.101421009767857	0	0.0740969068987185	0.112198564531565	0.103561693772214	0.0770966630251343	0.164424180800282	0.145838923825413	0.100120444895209	0	0
14	18	0.168762184910236	0.102847434059368	0.116743464409004	0.0762993007932075	0.0653152505884904	0.103115532705154	0.168762184910236	0.0932635721813418	0	0.0975213010901907	0	0	0.113489059101894
14	19	0.124113827273269	0	0.112074867650703	0.0767188277976862	0	0.103389522092273	0.124113827273269	0.107577431545791	0.061109641084745	0.158390102431417	0	0	0.191756760384587
14	20	0.194655902788422	0.0835770300233765	0.101653082426418	0.0897897393673237	0.0650170962454577	0.0726640153989582	0.194655902788422	0.128366079520219	0.0755697391559313	0.156383659158687	0	0	0.200666169068699
14	21	0.161982092152055	0.0869784554365882	0.11995153957801	0.094202052097503	0.0638745809827488	0	0.161982092152055	0	0	0.154265994683994	0.0258591575810517	0	0.188975187557874
14	22	0.160774030492403	0.102748417417501	0.109127178996947	0.0801742025072075	0.10241651773598	0.0708370316166924	0.160774030492403	0.053443698132891	0.0674851718206217	0.0620134271472459	0	0	0.224973644865345
14	23	0.16174006430785	0.101407845113714	0.112450901125296	0	0	0.0966888889963209	0.16174006430785	0	0.0743483921044982	0.167138833872356	0.0459959597148987	0	0.294193569534315
14	24	0	0.0995517186110943	0.113462430887197	0.0714569500458754	0.0580019488654819	0.0769006574237203	0	0.0335899155012086	0	0.140981740101147	0.0887327193029155	0	0.226341733141887
14	25	0.0445788148989532	0.0826510489244618	0.111749573675377	0.0967764724782229	0	0.109342077783768	0.0445788148989532	0	0.104012113147181	0.0903213452822451	0	0	0.240275584879357
14	26	0.144108733008565	0.0933323377883968	0.106087851349703	0.0911707509643585	0.0514821452198056	0.103556760495995	0.144108733008565	0.058300777207661	0	0.116827070234098	0	0	0.253761145312449
14	27	0.162430743591701	0.101777544820286	0.112997648442089	0.0867327512409288	0	0.108941480994069	0.162430743591701	0	0.0737234779787973	0.100846200468128	0	0	0.255324775906938
14	28	0.0860168438183565	0.096536091948697	0.123187602399694	0.0646819652450867	0.0592512186494395	0.0729844433658966	0.0860168438183565	0.0515441068076363	0.0742771533132437	0	0	0	0.239873725039835
14	29	0.146178296339535	0.111087412463119	0.122755115819452	0	0.0587978658726602	0.109958259844563	0.146178296339535	0	0.123537623383202	0.120362024595343	0	0	0.266952521693496
14	30	0.184926972338622	0.101793914149048	0.126919820941517	0.0920765377011984	0	0.10575687551887	0.184926972338622	0.0556299761013622	0.137353082134716	0.0876096325038746	0	0	0.227065590765085
14	31	0.127389346428958	0.105523634656072	0.121414773506811	0.0612967073247728	0.0802882669938148	0.114046412327961	0.127389346428958	0	0.125329459817496	0	0	0	0.149556863014887
14	32	0.0804731175527159	0.100802285389414	0.122628860466447	0	0.0659565346436699	0.106209315194198	0.0804731175527159	0.0616065509942066	0	0.152083507034883	0	0	0.17801116023181
14	33	0	0.0987190219709052	0.126764080637167	0.0674504407886304	0	0.100061738092403	0	0.0673616593601721	0.0723624606710026	0	0	0	0.21731221236068
14	34	0	0.100645844383409	0.127946937845936	0.0905066653633709	0.064795040328433	0.103006237027652	0	0	0.066556183402219	0.0481221069590822	0	0	0.247281265348768
14	35	0	0.105960377176558	0.121580251476592	0.0658305311470575	0.0718207125189247	0.101056137695051	0	0.0615738143808106	0.0728725408250191	0.143088332720439	0.0094396082185005	0	0.270301398177206
14	36	0	0.545010482266164	0.118829963690886	0.0984325599158991	0	0.0726719891631532	0	0.0588288240059252	0	0.062505820854567	0	0	0.181940947893122
14	37	0	0.137545338382164	0.125245010551892	0.113880689479247	0.0582941159668167	0.0842105263157895	0	0.0908947130181227	0.0707823287669294	0	0	0	0.110655334085052
14	38	0	0.0692780328364019	0.125833331236112	0.10007495614215	0.0714102088034505	0.0980030890573667	0	0.119161673792535	0.0829376516203943	0.0827320779567822	0	0	0.184178146557252
14	39	0	0.150171032489109	0.125979014415778	0.103888116653889	0	0.1176411075675	0	0	0	0.0897519435783382	0	0	0.223842343360728
14	40	0	0.169031130463298	0.121242051076074	0.0866636738811286	0.0806866758864642	0.108134294142582	0	0.0670023484323126	0.0635329262566972	0.0966815040548225	0	0	0.134436722638198
14	41	0	0.129535860059819	0.118815645644218	0.0905180529204743	0.0647026396088854	0.105618815358243	0	0.0617323581266946	0.0701939599501342	0	0	0	0.254144240224128
14	42	0	0.117854367248634	0.118213370405047	0	0	0.117709791218143	0	0.12161825246733	0.0719288882239462	0.055207716272088	0	0	0.117542376965456
14	43	0.00949161667194875	0.126816326841183	0.132998001040044	0.0814666605838225	0.0682010539790882	0.10982144131856	0.00949161667194875	0	0	0.0594114935098883	0	0	0.145853529840176
14	44	0	0.113208102530315	0.117993543393305	0.0858936808019036	0.0669132643502188	0.0726214302935937	0	0.0687713449061754	0.070080522520376	0	0	0	0.133207230488472
14	45	0.0426526720406191	0.119986225581303	0.124381396957532	0.0753213396653472	0	0.0929546855203558	0.0426526720406191	0.114215488077045	0.0875329452122544	0.0463474286678312	0	0	0.131365996174621
14	46	0	0.156017944895194	0.121215647485503	0.0971999607312158	0.0615636173796555	0.0950034818776112	0	0.0694587703158219	0.138180903675474	0	0	0	0.158373546969894
14	47	0.0603252010940579	0.127327061202298	0.119063777703164	0.131933257603644	0.0685650500627712	0.08435074388921	0.0603252010940579	0	0.0826991001510911	0.0530017262662246	0	0	0.213652720019182
14	48	0.0778838035957393	0.13387633575114	0.11794733887214	0.105492242627938	0	0	0.0778838035957393	0.0576889905753497	0.135158879262574	0	0	0	0.174897288009475
15	1	0.266850387037453	0.12100487286623	0.137881777406416	0.145031370285393	0	0	0.266850387037453	0.177223894034289	0.11824356282044	0.113329986321071	0	0	0
15	2	0.300536542939134	0.135973577614398	0.143248620873903	0.162064842014279	0.118022545399371	0.0879751980321708	0.300536542939134	0.165077939429964	0.125413708470818	0.127902752978855	0	0	0.0615595243664909
15	3	0.289142220438941	0.115052026526395	0.144452385837202	0.123930940722592	0.0954277692900078	0.0880899715733662	0.289142220438941	0.175951015237358	0.127186494829233	0.114019495053264	0.040509791419135	0.0398471939805235	0
15	4	0.264078652974491	0.128532887067149	0.146161221673955	0.160683612360426	0.131035838301776	0.0840213985697878	0.264078652974491	0.132589369093586	0.132237525042481	0.0860611860608418	0	0	0.062294505998338
15	5	0.301653092202061	0.115978993999675	0.15352595208412	0.145950269028116	0.128081316266071	0.0710673462600098	0.301653092202061	0.165118133768805	0.113756999966386	0.103977233145031	0.0461724429931933	0	0
15	6	0.382054528480204	0.100085372823018	0.14561784925349	0.150841848355673	0.0999338437954075	0	0.382054528480204	0.155229466619766	0.176767453576447	0.0947877181657818	0	0.0343756015730275	0.0493759131457937
15	7	0.371817102407193	0.111434518848034	0.150377035666006	0.160097400100623	0.131816737825736	0.0798758409927609	0.371817102407193	0.189157850334526	0.125486731660428	0.0979677568518649	0.0496378176634189	0	0.0591839246991089
15	8	0.355359677853525	0.132112263717216	0.164760931887831	0.146094385738851	0.11518263711753	0.0745577606427475	0.355359677853525	0.156736894822704	0.127114213457492	0.142013178822995	0	0.0388471109792036	0
15	9	0.36476543812298	0.108607703544412	0.152213078607855	0.13520293510233	0.121627867376973	0.0839763119619218	0.36476543812298	0.131920900228223	0.122875482900648	0.126691971276396	0.048398728081426	0	0.0768612331923698
15	10	0.404888657849039	0.112541513750885	0.165335635942872	0.138109719885866	0.0981498748589095	0	0.404888657849039	0.148529453618206	0.113419706220277	0.123594006629229	0	0	0.0627225474386307
15	11	0.410081763967479	0.104236918006198	0.168556181460842	0.131087713410798	0.113425752636582	0.0666609782631882	0.410081763967479	0.11785392712856	0.153020080825207	0.123979647501066	0.0619049770982537	0.0464522770209411	0
15	12	0.438782591007975	0.13184245880912	0.158387298936732	0.13397318928536	0.105350543398103	0.0821194032547204	0.438782591007975	0.174120307702561	0.120986004155082	0.0937316930287054	0	0	0.0779466969307709
15	13	0.452894418964852	0.117898014085734	0.16315156617346	0.117495323200124	0.106037904309274	0.0793716306742779	0.452894418964852	0.159557924594243	0.131421069162966	0.0955207456731489	0	0.0480167405564276	0.0646283321560206
15	14	0.540275341832474	0.10669398032563	0.157875151216301	0.160505657021882	0.111066314364318	0.0898836007370454	0.540275341832474	0.156262207984998	0.161496621490678	0.127063349974397	0.0341302869094309	0.0593030468719421	0
15	15	0.328695350315276	0.0962015769362493	0.148128836536866	0.148324753255661	0.11065423208176	0.0851240598047595	0.328695350315276	0.172596425050982	0.123122535240747	0.0807406175365393	0	0	0
15	16	0.324053821517015	0.110949617778567	0.150024992898343	0.158888290409661	0.125856515199028	0.0934410022855668	0.324053821517015	0.133791793211404	0.0843323910594174	0.114892609877548	0.052348456453413	0	0
15	17	0.414311283066479	0.113587056527735	0.129760423330405	0.140079685308516	0.128145819691143	0	0.414311283066479	0.153476965562197	0.0984479677878248	0.0912321356074464	0	0.0430375007262578	0
15	18	0.371955418501456	0.117547903709459	0.158166288300668	0.133263503257626	0.133573944532084	0.0738576983725457	0.371955418501456	0.131787553192751	0.0793349195028239	0.0899664065437965	0.0384098034109442	0	0
15	19	0.202407024333373	0.113535085179698	0.164597673905672	0.135657784247147	0.104874240055038	0.0716373431142185	0.202407024333373	0.1488185916915	0.10824021968435	0.109271465286641	0	0.0503702211252707	0.0185499951120763
15	20	0.189660372355889	0.121661990996853	0.14205459411872	0.139844105574506	0.0970788017757653	0.0878303959921233	0.189660372355889	0.149569389726976	0.0967464179638749	0.144852380938585	0	0	0
15	21	0.238312862708938	0.115918912402396	0.151206095420118	0.155996749027751	0.131472626786598	0	0.238312862708938	0.163380380462143	0.135938642734216	0.114479347925634	0.0338173269161574	0	0
15	22	0.381801892633761	0.107235500956004	0.152277783436254	0.140207127705546	0.136341202038574	0.0804742184746274	0.381801892633761	0.116101946797444	0.0996346397759415	0.117480788953986	0	0.0357259859746924	0
15	23	0.258174807840974	0.108005707021559	0.166611116003189	0.157326457118314	0.106067034365719	0.0750782315172409	0.258174807840974	0.166510701642795	0.117351471176719	0.0923861779191492	0	0	0
15	24	0.35009880993948	0.119958158594282	0.150381367147085	0.143038313700976	0.147505026233768	0.0783867382180813	0.35009880993948	0.12512376260581	0.100225005136531	0.115771425528294	0.0411911322082937	0.0405167998859047	0
15	25	0.272809543770154	0.108518483953372	0.15396644477911	0.101477306629918	0.141682165269572	0	0.272809543770154	0.121752851451781	0.106173793759529	0.123547795597387	0	0	0
15	26	0.23429093589792	0.117482445185628	0.150988521852569	0.125630823773874	0.160309331819113	0.0684631394457225	0.23429093589792	0.120549319137446	0.118612286660259	0.0884225679151639	0	0	0
15	27	0.233127959154747	0.115586090832174	0.151464765228344	0.147952193687176	0.139351069937514	0.0806309858428116	0.233127959154747	0.141209115866976	0.101216316475081	0	0	0.030604503207811	0
15	28	0.194018623541171	0.111156685352106	0.152690404934953	0.138182736557523	0.173723381141021	0.0783165696715948	0.194018623541171	0.152007101771796	0.114400637897957	0.0763588438049305	0	0	0
15	29	0.199383937003297	0.0857638817418988	0.157549746654102	0.105764145954522	0.151881969483874	0.0841349288681248	0.199383937003297	0.143803369025329	0.144280365606447	0.117505501326277	0	0	0
15	30	0.193122893753441	0.10622262775661	0.174805005016903	0.137993083786641	0.168086100355254	0.0938177833484689	0.193122893753441	0.130087462882204	0.106556870467337	0	0	0.0326155626461789	0
15	31	0.180536812100084	0.120632852326014	0.154998896378336	0.138280689964996	0.161811765807725	0.100011801392565	0.180536812100084	0.136863686505515	0.122020177760212	0.0668662401046322	0	0	0
15	32	0.183327577833909	0.110878635571862	0.143419346696192	0.136081638096327	0.138830271663076	0.116427582625744	0.183327577833909	0.126936898398436	0	0.0850291692565134	0	0	0
15	33	0.175140304108418	0.103963612735543	0.149683046016025	0.158928084390804	0.168515500732495	0.0974290424283997	0.175140304108418	0.0988762711780618	0.103995255503259	0.0773833890364763	0	0.0449641500831387	0
15	34	0.178378397662529	0.124314096969968	0.168417056936432	0.170089722328528	0.180563104096435	0.101692260913868	0.178378397662529	0.10749567329915	0.0914698844552418	0	0	0	0
15	35	0.169244864182032	0.100756175094081	0.145829566069543	0.153117807552622	0.147393595414203	0.103459263949413	0.169244864182032	0.101605880948389	0.114579693041002	0.0844841482392658	0	0	0
15	36	0.174659217179534	0.123187147145815	0.156759844442123	0.136025180981504	0.16640899792203	0.112750376304381	0.174659217179534	0.105706904352164	0.0916310603637939	0.0973114784727549	0	0.0330459983774415	0
15	37	0.172664280065954	0.0968507994064979	0.177529394429482	0.159085022166719	0.187207721944115	0.100973995157287	0.172664280065954	0.106708553330801	0.101465465721414	0.0984886910360516	0	0	0
15	38	0.169358335139823	0.125928882922658	0.169660087724247	0.17964514253895	0.154058214320283	0.0995163505363935	0.169358335139823	0.115919638605484	0.128162900172635	0.0740926246719549	0	0.0383140734871592	0
15	39	0.165341668466066	0.114741931330763	0.155188393039869	0.156446535960801	0.179620977016199	0.0922677758483558	0.165341668466066	0.117590615328172	0.0903860024621145	0.0753895945773772	0	0	0
15	40	0.173244044261951	0.115775312535457	0.150384307096786	0.173780403018208	0.153462968618357	0.0831690052404791	0.173244044261951	0.143871643474558	0.125393579096389	0	0	0.0498503492515468	0
15	41	0.186507051604571	0.0899475515826721	0.15532494910314	0.162419550431114	0.153454647496045	0	0.186507051604571	0.150039310299297	0.0962513932389173	0.0794334804176615	0	0	0
15	42	0.187868221714561	0.109272420515242	0.128954053670677	0.167343851452211	0.189293106670827	0.0852081251059775	0.187868221714561	0.111401118335607	0.0915291593595888	0.0801729169472717	0	0	0
15	43	0.166749419054755	0.115312855307735	0.157106315494807	0.176463846670665	0.204764719056115	0.102110313856472	0.166749419054755	0.105730822014849	0.141009515322094	0.06744106999304	0	0.040234729411386	0.00407587518822392
15	44	0.167548251306149	0.110739886403025	0.1338845807806	0.160943593412091	0.20557297054858	0.0987403691112473	0.167548251306149	0	0.104852687217094	0	0	0	0
15	45	0.171888348204541	0.0922085610116389	0.155266655817642	0.171107476027844	0.197291003926321	0.0839545268700662	0.171888348204541	0.0833459046739548	0.102424909738049	0.0634919828673233	0	0.047828811119242	0
15	46	0.16440834018989	0.0942620787427701	0.154672581346178	0.136619966857958	0.159956747695423	0.10414941691949	0.16440834018989	0.0991988699264738	0.138964823750353	0	0	0	0
15	47	0.154824002414205	0.0976939346720656	0.138918988002956	0.177689643714495	0.179572689811882	0.105404288689698	0.154824002414205	0.111590293008959	0.118172160293445	0.0555051383881863	0	0.051425330163476	0
15	48	0.16835356943238	0.106874944558623	0.102267474443358	0.163596368483624	0.191179755982488	0.125155192438623	0.16835356943238	0.125753262039617	0.0850421128542856	0	0	0.0621988796737794	0
