# Supplementary material for: Two central pattern generators from the crab, Cancer borealis, respond robustly and differentially to extreme extracellular pH
Source: eLife journal article supplement (doi:10.7554/elife.41877), 2018-12-28
Supplement: supp [file elife-41877-supp-v1.zip › elife_poa_e41877_Figure_7_source_data_3.csv]

prep	bin	pH78_1	pH55	pH61	pH67	pH72	pH78_2	pH78_3	pH83	pH88	pH93	pH98	pH104	pH78_4
1	1	11.5	6.66666666666667	4.33333333333333	3.75	3.25	2.5	11.5	4.5	0	2	0	0	0
1	2	12	6.5	4.33333333333333	1.8	3	3	12	3	0	0.5	1	0	0
1	3	12	7	4.33333333333333	3.66666666666667	3.5	3	12	3.33333333333333	1.5	0	1	0	0
1	4	12	6	4	3.25	3.33333333333333	3.33333333333333	12	5	0	0	0	0	0
1	5	11	6.66666666666667	4.66666666666667	3	3	3	11	3	1	3	0.5	0.5	0
1	6	12.5	7	4	4	3.75	2.33333333333333	12.5	5	0	0	0	0	0.25
1	7	12	7	4.66666666666667	3	3	3.33333333333333	12	2.5	0	3	0	0	0
1	8	11	6.5	4.5	4	3.33333333333333	2.5	11	4.5	0	1.5	0	0	0
1	9	11	7	5	3	3.66666666666667	3.33333333333333	11	5	1	0	1.5	0	0
1	10	12	7.33333333333333	4.33333333333333	4	3	3.25	12	5	0	0	0	0	0
1	11	10.5	6.5	4.33333333333333	3	3.33333333333333	2.33333333333333	10.5	5	0.333333333333333	1	0	0	0
1	12	12	6.5	4.66666666666667	4.33333333333333	3	3	12	3	0	2	1	0	0
1	13	11	7	4.66666666666667	3.5	3.25	3.25	11	5	0.5	0	0	0	0
1	14	11	8.5	4.66666666666667	3	3.66666666666667	2.66666666666667	11	5	0	2	0	4	0
1	15	10	7	4.5	3.66666666666667	3.33333333333333	3	10	2.33333333333333	4	0	1	0	0
1	16	10	7	4.33333333333333	3	3	3	10	3.66666666666667	0	0	0	0	0
1	17	10.5	11	4.33333333333333	4	3	3.66666666666667	10.5	3	0.333333333333333	0	0	0	0
1	18	10	7	4.66666666666667	2.8	3.33333333333333	3.33333333333333	10	2.33333333333333	0	4	0	0	0
1	19	9	11	4.33333333333333	3	4	3	9	3	0	0	3	0	0
1	20	7	11.5	4.66666666666667	4	3	3.33333333333333	7	2.5	0	0	0	0	0
1	21	10.5	8	4.66666666666667	3	3.66666666666667	2.66666666666667	10.5	5	0	0	0	0	0
1	22	9	11	5.5	3.25	3.25	3.33333333333333	9	3.33333333333333	0	2	0	0	0
1	23	10	11	4.33333333333333	2.6	3.33333333333333	2.75	10	3	0	2	0	0	0
1	24	10	9	4.66666666666667	2	3.33333333333333	3	10	3	0	2	0	0	0
1	25	10	9.5	5	3.5	4	3	10	3.66666666666667	0	0	0	0.5	0
1	26	8.5	11	4.33333333333333	3.33333333333333	3.25	3.25	8.5	5	0	0	0	2	0
1	27	10	12	5	3.25	3.66666666666667	3	10	2	0	0	0	0	0
1	28	8	11	4.66666666666667	4.33333333333333	3	2.66666666666667	8	3.33333333333333	0	0	0.5	0.666666666666667	0
1	29	6	11	5.33333333333333	2.66666666666667	3.25	3.75	6	3	0	0	0	0	0
1	30	7.5	9.5	5	4.33333333333333	3.33333333333333	2.33333333333333	7.5	3	0	0	0	0	0
1	31	8	12	4.66666666666667	3.33333333333333	3	3.33333333333333	8	2	0	0	1	0	0
1	32	10	11	5	3.75	3.5	3	10	3.33333333333333	0	0	0	0.666666666666667	0
1	33	6.5	11	4.66666666666667	3.66666666666667	4	3	6.5	2.5	0	0	0	0	0
1	34	6.5	11	4.66666666666667	3.66666666666667	3.33333333333333	2.33333333333333	6.5	3	0	0	0	0	0
1	35	7	12	4.66666666666667	4	3	3.33333333333333	7	3	0	0	0	0	0
1	36	7	11	5	3	3.33333333333333	3	7	3.66666666666667	0	0	0.5	0	0
1	37	7	11	4.66666666666667	3.33333333333333	3.33333333333333	3.33333333333333	7	3	0	2	0	2	0
1	38	7	11	5	4	3	3	7	3	2.5	1	0.5	0	0
1	39	7	12	4.66666666666667	3.5	3.5	3.25	7	3	0	2	4	0	0
1	40	7	10	5	4	3.33333333333333	3	7	3.66666666666667	1	0	0.5	0	0
1	41	7	12	5	3.66666666666667	3.33333333333333	3	7	2.5	0	1	0	0	0
1	42	7	12	4.33333333333333	3.66666666666667	3.33333333333333	3.33333333333333	7	3.5	0	0	3	0	0.666666666666667
1	43	7	12	5.33333333333333	4.33333333333333	3.75	3	7	2.66666666666667	0	0	1	0	0
1	44	7	11	5.5	3.66666666666667	3.66666666666667	3	7	3.5	0	0	1	0	0
1	45	7	12	4.66666666666667	4	2.75	3	7	3.66666666666667	0	0	0	0	0
1	46	7	11.5	5	3.33333333333333	3.33333333333333	3.25	7	3	0	1	0	0	0
1	47	6.5	11	5	3.66666666666667	3.5	2.66666666666667	6.5	3	0	2	0	0.5	0
1	48	6	12	4.5	4	2.66666666666667	2.75	6	3.5	0	1	2	0	0
2	1	18.315	16.005	13.035	13.86	11.055	4.29	18.315	16.17	14.85	14.355	11.55	14.85	15.345
2	2	18.81	14.85	12.54	14.19	12.54	7.92	18.81	16.335	15.345	15.345	15.345	14.85	15.345
2	3	18.15	15.51	11.715	12.705	12.87	8.25	18.15	17.49	15.345	14.355	12.375	14.85	16.83
2	4	18.81	15.84	12.87	14.19	11.88	7.755	18.81	17.82	16.335	14.355	13.365	14.355	17.82
2	5	18.48	17.16	12.87	13.035	12.54	8.58	18.48	16.83	15.84	15.84	12.87	12.87	16.335
2	6	18.15	16.5	13.53	13.2	11.385	8.745	18.15	14.85	14.355	14.85	14.19	14.355	15.84
2	7	18.15	15.18	12.21	15.015	13.53	7.755	18.15	15.345	14.355	14.355	13.365	14.85	15.345
2	8	17.82	17.325	12.705	13.53	11.715	8.58	17.82	16.17	13.86	13.86	12.87	14.85	16.83
2	9	16.335	16.83	12.54	13.2	12.21	9.075	16.335	16.83	14.355	13.86	13.365	13.86	15.84
2	10	17.82	16.17	13.035	10.23	12.21	7.92	17.82	16.17	14.355	13.86	13.365	14.355	15.345
2	11	18.15	17.49	13.53	12.87	11.88	8.415	18.15	15.84	16.335	13.86	13.365	13.365	14.85
2	12	17.82	17.16	12.21	13.53	12.87	7.92	17.82	14.52	16.335	14.355	13.86	14.355	15.345
2	13	17.82	16.5	11.55	13.695	12.87	8.25	17.82	14.685	13.86	13.86	13.2	13.86	14.355
2	14	19.47	17.16	13.86	14.52	11.55	9.24	19.47	17.655	13.365	15.345	13.365	13.86	15.84
2	15	17.49	16.17	12.705	14.52	12.87	8.085	17.49	16.5	14.355	13.86	13.365	14.355	15.84
2	16	18.15	17.49	12.87	13.2	13.365	8.25	18.15	14.85	15.345	12.87	14.355	14.355	15.84
2	17	17.82	16.83	13.035	13.365	12.54	9.24	17.82	15.18	14.355	13.86	13.86	13.86	15.84
2	18	18.81	17.16	12.21	13.53	11.88	8.91	18.81	16.83	13.86	13.365	13.365	13.86	13.86
2	19	18.48	16.83	12.54	14.19	13.2	7.755	18.48	16.17	13.86	15.84	13.365	14.355	16.335
2	20	18.81	16.5	13.365	14.52	11.88	7.59	18.81	17.325	14.355	14.85	12.375	14.355	16.335
2	21	17.82	15.51	14.52	13.53	12.87	9.24	17.82	16.83	14.355	14.85	14.19	14.355	16.83
2	22	17.985	15.51	12.87	14.19	12.87	7.92	17.985	15.015	13.365	14.355	12.87	13.86	15.345
2	23	18.15	16.17	11.88	14.19	12.705	8.58	18.15	15.675	14.85	13.86	12.375	13.86	15.84
2	24	16.5	16.995	15.18	13.53	10.56	8.58	16.5	17.82	15.84	14.85	13.86	13.86	14.85
2	25	18.81	15.84	14.685	13.035	12.54	8.745	18.81	16.995	15.84	13.365	13.86	14.355	15.84
2	26	18.48	14.52	15.84	14.19	13.2	8.58	18.48	16.83	14.355	13.365	11.88	13.86	15.84
2	27	16.83	14.85	14.19	13.365	13.035	8.91	16.83	14.355	14.355	13.86	13.365	14.355	16.335
2	28	18.975	16.83	14.19	14.52	12.375	9.075	18.975	15.675	14.85	13.86	13.365	13.86	16.335
2	29	18.81	15.84	14.025	14.025	12.21	8.58	18.81	14.52	14.355	13.365	12.87	13.86	15.84
2	30	19.14	16.5	13.53	15.51	11.88	10.395	19.14	15.18	16.83	13.86	12.87	13.86	16.335
2	31	19.965	16.17	19.47	13.86	14.52	9.57	19.965	16.665	14.85	14.355	13.2	14.355	16.83
2	32	19.8	16.5	19.8	14.19	12.54	9.24	19.8	16.83	14.85	14.355	12.87	14.85	17.325
2	33	19.8	15.18	21.78	14.85	13.2	10.065	19.8	15.51	15.84	14.355	13.86	15.345	16.83
2	34	20.295	15.51	19.965	13.86	11.385	11.55	20.295	15.84	15.345	14.355	12.87	14.85	16.5
2	35	19.47	16.665	14.85	13.53	12.375	9.57	19.47	15.84	13.86	13.86	13.86	14.355	16.83
2	36	19.8	15.51	15.18	15.015	12.21	9.9	19.8	16.335	15.345	13.86	12.375	15.84	17.325
2	37	20.13	17.82	16.5	16.83	13.365	9.075	20.13	16.335	16.335	14.355	12.87	14.355	17.325
2	38	19.635	15.84	14.85	14.19	12.54	9.57	19.635	15.51	15.84	14.355	14.355	14.85	18.81
2	39	22.11	16.5	14.19	14.52	11.715	9.735	22.11	15.84	15.84	12.87	12.87	14.355	18.315
2	40	19.47	16.83	12.54	12.375	12.21	9.57	19.47	15.345	15.84	15.345	13.365	14.355	19.8
2	41	19.8	17.49	12.21	13.86	11.55	9.075	19.8	15.84	14.85	13.86	13.2	15.345	20.79
2	42	20.79	16.17	13.695	14.355	12.87	9.075	20.79	15.345	13.365	13.365	12.87	14.85	21.285
2	43	19.47	16.83	12.87	12.87	12.375	8.25	19.47	15.345	13.86	12.87	13.365	14.355	21.285
2	44	20.625	15.18	14.685	12.705	12.21	9.57	20.625	14.85	14.355	14.355	13.86	14.355	19.8
2	45	21.12	17.16	13.53	12.87	13.53	8.58	21.12	13.86	14.85	13.86	11.88	15.345	19.47
2	46	19.965	16.5	13.86	14.025	15.84	9.9	19.965	15.015	15.345	13.365	13.365	14.85	19.8
2	47	18.48	17.16	13.035	14.52	14.355	9.57	18.48	16.17	15.345	13.365	12.87	15.345	18.81
2	48	18.48	18.81	14.19	13.53	13.53	9.24	18.48	15.345	15.84	13.86	12.375	14.85	18.81
3	1	5	5.33333333333333	4.25	3	3	1	2.66666666666667	3	2.66666666666667	2.66666666666667	1	0	1
3	2	5	5.33333333333333	5	3	3	0	3	3.33333333333333	2.66666666666667	2	1	0	0
3	3	5	5.33333333333333	4.25	3	3	0	2.66666666666667	3.33333333333333	2.66666666666667	2	1	0	0
3	4	5	6	4	3	3	0	3	3.33333333333333	2.66666666666667	2.5	1	0	0
3	5	5.66666666666667	5.5	4.5	3	3	1	3	3.33333333333333	2.33333333333333	2.33333333333333	1	0	1
3	6	5	5.33333333333333	4.75	3.66666666666667	3.66666666666667	0	3	3.5	2.66666666666667	3	1	0	0
3	7	5	5.66666666666667	4.33333333333333	3.33333333333333	3	0	3	3	2.66666666666667	3	2	0	0
3	8	5.66666666666667	6.33333333333333	4.66666666666667	3	4	0	3	3.33333333333333	2.66666666666667	2.5	1.5	0	0
3	9	6	5.33333333333333	4.66666666666667	3.66666666666667	3	0	3	3.33333333333333	2.66666666666667	3	2	0	0
3	10	5	5.66666666666667	3.5	3	3.33333333333333	0	3	3.33333333333333	2.33333333333333	2.5	1	0	0
3	11	5.5	6	4.33333333333333	3.5	3.66666666666667	0	3	3.5	2.66666666666667	3	1.5	0	0
3	12	6	5.33333333333333	4.33333333333333	3	4.66666666666667	0	2.66666666666667	3	2.33333333333333	3	1	0	0
3	13	5	5.33333333333333	4.66666666666667	3.66666666666667	2.66666666666667	0	3	3.33333333333333	2.66666666666667	2.5	1	0	0
3	14	5.33333333333333	5.66666666666667	4	3	3	0	2.66666666666667	3.33333333333333	2.33333333333333	3	1	0	0
3	15	4.66666666666667	5	4.33333333333333	3	3.66666666666667	0	3	3	2.33333333333333	2.5	1	0	0
3	16	5.33333333333333	5	4.33333333333333	3.33333333333333	3.66666666666667	0	3	3.33333333333333	2.33333333333333	2.5	1	0	0
3	17	3	5	4.33333333333333	3.33333333333333	4	0	3	3.33333333333333	2.66666666666667	3	1	0	0
3	18	3.33333333333333	5.66666666666667	4	2.66666666666667	4	0	3	3.5	2.66666666666667	2.5	1	0	0
3	19	3.66666666666667	4.66666666666667	4.66666666666667	3.66666666666667	2.75	0	2.5	3	3	2.5	1	0	0
3	20	2.75	5.33333333333333	3.66666666666667	3.33333333333333	3.66666666666667	0	3	3.66666666666667	2.33333333333333	2.5	1	0	0
3	21	2.5	5.5	3.33333333333333	2.66666666666667	3.33333333333333	0	2.66666666666667	3	3	2.5	1	0	0
3	22	2	5	4	3.33333333333333	3.33333333333333	0	2.66666666666667	4	2.5	2.5	2	0	0
3	23	2.66666666666667	5.33333333333333	4.33333333333333	3	4	1	2.66666666666667	3.33333333333333	2.66666666666667	3	1	0	1
3	24	2.33333333333333	5.66666666666667	3.33333333333333	3	3	1	3	3.66666666666667	3	2.5	1	0	1
3	25	2.33333333333333	5.33333333333333	4.33333333333333	2.66666666666667	3	0	2.66666666666667	3.33333333333333	2.33333333333333	3	1	0	0
3	26	2.33333333333333	5	3.66666666666667	3.33333333333333	3	0	3	3.5	2.33333333333333	3	1	0	0
3	27	2.33333333333333	5.66666666666667	3.33333333333333	3.33333333333333	3	1	2.66666666666667	3.33333333333333	2.33333333333333	3	1	0	1
3	28	2	5.33333333333333	4.33333333333333	3.33333333333333	3	1	2.5	3	2.66666666666667	2.5	2	0	1
3	29	2.5	5	4	3.66666666666667	3	1	3	3	3	2.33333333333333	1	0	1
3	30	2	5.33333333333333	4	3.66666666666667	2.66666666666667	2	3	3	2.33333333333333	2.5	1	0	2
3	31	2	5.5	4.66666666666667	3.66666666666667	3	3	2.66666666666667	3.33333333333333	2.33333333333333	2.5	1	0	3
3	32	2	5.33333333333333	3.66666666666667	3.66666666666667	3	2.5	2.5	3	2	2.5	1	0	2.5
3	33	2	6	4	3.66666666666667	3.33333333333333	1	3	3	2.33333333333333	2.5	1	0	1
3	34	2	6.33333333333333	4.66666666666667	3.66666666666667	3	3	3	3	2	2.5	1	0	3
3	35	1.66666666666667	5.66666666666667	4.66666666666667	4	3	4	2.66666666666667	3	2.33333333333333	2	1	0	4
3	36	1.33333333333333	5.66666666666667	5	3.66666666666667	2.66666666666667	1.33333333333333	2.5	3	2	1.66666666666667	1	0	1.33333333333333
3	37	1.33333333333333	6.5	4.66666666666667	3.66666666666667	3	2	3	3	2	2.5	1	0	2
3	38	1.4	5.33333333333333	4.66666666666667	4.5	4	2	3	3	2	2	1	0	2
3	39	1.5	5.33333333333333	5.66666666666667	3.5	3	2.5	3	3	2	2	1	0	2.5
3	40	1.66666666666667	5.33333333333333	4.66666666666667	3.33333333333333	3.25	3	3	3	2	2	1	0	3
3	41	1.33333333333333	5.5	5.5	3.66666666666667	3.66666666666667	3	3	3	2	1.33333333333333	1	0	3
3	42	1.5	6	5	3.33333333333333	3	2.66666666666667	3	3	2	2	1	0	2.66666666666667
3	43	2.33333333333333	5.66666666666667	4.66666666666667	3.33333333333333	3.33333333333333	3	3	3	2	2.5	1	0	3
3	44	1.33333333333333	5.66666666666667	5	4	3.33333333333333	3	3	3	2	2.5	1	0	3
3	45	2.33333333333333	6	4.66666666666667	4	3.66666666666667	3	3	3	2	2	1	0	3
3	46	2.66666666666667	6	5.66666666666667	3.33333333333333	3.33333333333333	3	3	3	2	2.5	1	0	3
3	47	3.33333333333333	5.33333333333333	4.66666666666667	4	3.25	3	3	3	2	2	1	0	3
3	48	1.66666666666667	6.66666666666667	4	3.66666666666667	3	3	3	3	2	2	1	0	3
4	1	7.5	5	4	3.33333333333333	3.33333333333333	4	4.33333333333333	3.66666666666667	3	2.5	1	0	4
4	2	8	6	4.5	3	3	0	4	4.5	2.5	2	0	0	0
4	3	8	5.5	4	2.33333333333333	2.66666666666667	2	4	3.66666666666667	3	3	0	0	2
4	4	8	6	4	3	2.66666666666667	3	4	3.5	3	2	0	0	3
4	5	7.5	6	4	3.33333333333333	2.66666666666667	3	4	3.5	3	2	0	0	3
4	6	8	7	4	3.5	3	3	4	3.66666666666667	2.5	2	0	0	3
4	7	7	6	4	2.5	3	4	4	3.5	3	3	0	0	4
4	8	8	6	4	3	3	4.5	4	4.5	3	0	0	0	4.5
4	9	8	6	4	3.33333333333333	2.66666666666667	5	4	3.66666666666667	3	3	0	0	5
4	10	8	6	4	3	2.5	4	4	4	3	2	0	0	4
4	11	8	6	4	2.5	2.66666666666667	5	4	4	3	3	0	0	5
4	12	7	6	4	3.33333333333333	2.66666666666667	4.5	4	4	2.66666666666667	3	0	0	4.5
4	13	8	6	4	3	3	5	4	3.5	3	0	0	0	5
4	14	7	6	4	3.33333333333333	2.66666666666667	5	4	4	3	3	0	0	5
4	15	6.5	6	4	3	3	4.5	4	3.66666666666667	2.5	2	0	0	4.5
4	16	6	6	4	3	2.66666666666667	4.5	4	4	3	3	0	0	4.5
4	17	7	6	4	3.5	3.33333333333333	5	4	3.66666666666667	3.5	3	0	0	5
4	18	6	6	4	3	2.5	4	4	3.5	3	0	0	0	4
4	19	5	6	4	3	3	4	4	3.5	2.66666666666667	2.5	0	0	4
4	20	6	6	4	3	3	3.5	4	3.33333333333333	3	3	0	0	3.5
4	21	6	5	4.5	3	2	4	4	3	2.5	0	0	0	4
4	22	5	5	4	3.5	3	4	4	3.66666666666667	2.66666666666667	3	0	0	4
4	23	0	5	4	3	3.33333333333333	4	4	3.5	3	3	0	0	4
4	24	6	5	4	2.66666666666667	2.5	4	4	3	2.66666666666667	0	0	0	4
4	25	5	5	4	4	2.66666666666667	4	4	3.66666666666667	2.5	2	0	0	4
4	26	5	5	4	3	2.66666666666667	4	3.5	3.5	3	3	0	0	4
4	27	6	5	4	4	2.66666666666667	4.66666666666667	4	3.66666666666667	3	0	0	0	4.66666666666667
4	28	5	5.5	4.5	3	2	3.5	4	3.5	3	2	0	0	3.5
4	29	0	6	4	2.66666666666667	3.33333333333333	4	3.66666666666667	3.5	2.5	2	0	0	4
4	30	4	5	4.5	3.5	3	4.66666666666667	4	3.66666666666667	3	2	0	0	4.66666666666667
4	31	5	5	4	3.5	2.33333333333333	4.5	3.5	4	2.5	0	0	0	4.5
4	32	0	5.5	4	4	3.33333333333333	4.66666666666667	4	3.5	2.5	2	0	0	4.66666666666667
4	33	6	5	4	3.33333333333333	2.66666666666667	4.5	3	4	2.66666666666667	2	0	0	4.5
4	34	6	5	4	3.5	3.5	3.66666666666667	3.33333333333333	3.5	2.5	2	0	0	3.66666666666667
4	35	0	5.5	4	3	3	4.33333333333333	3.5	3.5	2.5	0	0	0	4.33333333333333
4	36	4	5	4	3	3	4.5	4	3.33333333333333	2	2	0	0	4.5
4	37	5	6	4	3.33333333333333	3	3.66666666666667	3.5	3.5	2	0	0	0	3.66666666666667
4	38	0	5	4.33333333333333	3	3.33333333333333	5	3.5	3	2.5	2	0	0	5
4	39	5	5.5	4	4	3	5	3.33333333333333	3.66666666666667	2.5	2	0	0	5
4	40	5	6	4.33333333333333	3	3.33333333333333	4.33333333333333	4	3.5	2	0	0	0	4.33333333333333
4	41	0	6	4.5	4	3	4	3.5	3	2.5	0	0	0	4
4	42	5	6.5	4	4	2.66666666666667	5	3	3	2.5	0	0	0	5
4	43	5	5	4	3.66666666666667	3	4	3.33333333333333	3	2.33333333333333	0	0	0	4
4	44	0	5.5	4.5	3.5	3	5	4	3.5	2	0	0	0	5
4	45	5	6	3.5	4	3	4	3	2.66666666666667	2.5	0	0	0	4
4	46	4	5	4.5	3	3.5	4	4	3	2	0	0	0	4
4	47	4	5	4	3	3	4	3.66666666666667	3	2	0	0	0	4
4	48	4	6	4.5	4	3.5	4	3.5	3	2	0	0	0	4
5	1	9	9.5	8.33333333333333	5.66666666666667	5.66666666666667	5.66666666666667	1.25	1.25	2.33333333333333	2.75	3.33333333333333	5	5.66666666666667
5	2	10	10	8	6.33333333333333	6.33333333333333	7.33333333333333	1	2	1.66666666666667	4	4	5.33333333333333	7.33333333333333
5	3	10	10.5	7	6.5	6	6	1	1	2	2.66666666666667	3.66666666666667	5.66666666666667	6
5	4	10	10.5	8.5	6.66666666666667	5.66666666666667	6.5	1	1.33333333333333	2.5	4	4.5	6	6.5
5	5	9	9.5	7.5	6.5	5	6.5	1	1.33333333333333	2.33333333333333	4.33333333333333	5	5.33333333333333	6.5
5	6	9.5	11.5	7.66666666666667	7	6	5.33333333333333	1	1.25	1.33333333333333	4	5.33333333333333	4.33333333333333	5.33333333333333
5	7	10	12	8	5.66666666666667	4.5	8.33333333333333	1	1	2.33333333333333	4	4.66666666666667	5	8.33333333333333
5	8	11	10	8.5	7	5.66666666666667	6.33333333333333	1	1.66666666666667	1.75	4	5	5.33333333333333	6.33333333333333
5	9	10	11	9.5	6	6	6.33333333333333	1	1.33333333333333	2.66666666666667	2.66666666666667	4	5.66666666666667	6.33333333333333
5	10	11	9.5	8	6	5	7	1	1.5	1.5	3.66666666666667	4.33333333333333	4.66666666666667	7
5	11	9	11	8	7.33333333333333	5.66666666666667	6.66666666666667	1	1.33333333333333	2.66666666666667	3.66666666666667	4.33333333333333	4.33333333333333	6.66666666666667
5	12	10	12	8.33333333333333	7	5.66666666666667	7	1	1.33333333333333	2	3.66666666666667	4.5	5.66666666666667	7
5	13	10	12	7.5	6	5	6.33333333333333	1.5	1.25	2.33333333333333	3	3	5	6.33333333333333
5	14	10.5	9.5	9	8	6	6.33333333333333	1	1.33333333333333	2	4.66666666666667	4	4.66666666666667	6.33333333333333
5	15	8	9	8.5	7	7	5.66666666666667	1	1.33333333333333	3	2.5	4.33333333333333	6	5.66666666666667
5	16	10	10	8	6.5	6	6.66666666666667	1	1.33333333333333	3	3.66666666666667	5	4.66666666666667	6.66666666666667
5	17	10	9	8	7	5	7	1	1	2	2.66666666666667	3.66666666666667	5	7
5	18	12	10	8	6.66666666666667	6.33333333333333	6.66666666666667	1.25	1.33333333333333	2.33333333333333	5.5	5.5	5.66666666666667	6.66666666666667
5	19	9.5	10.5	8.33333333333333	6.5	6	7.33333333333333	1	1.25	2.33333333333333	3	4.33333333333333	6	7.33333333333333
5	20	9.5	11.5	8	7	6	7	1.5	2.5	2.33333333333333	3.33333333333333	4.33333333333333	4.66666666666667	7
5	21	10	11.5	9.5	6.5	6.33333333333333	7	1	1.33333333333333	2.33333333333333	3.33333333333333	4.66666666666667	5.33333333333333	7
5	22	10	12	9	6	6.5	6.66666666666667	1	1.33333333333333	3	3.66666666666667	4.66666666666667	5.33333333333333	6.66666666666667
5	23	9.5	10.5	8.5	6.33333333333333	6	7.33333333333333	1.66666666666667	1.5	2	3	4.5	5.33333333333333	7.33333333333333
5	24	11	11	9	6.5	6.33333333333333	5.66666666666667	1	1.66666666666667	2.66666666666667	4.66666666666667	4.33333333333333	6.33333333333333	5.66666666666667
5	25	11.5	12	8	7	5.5	6.33333333333333	1	1.5	3	3.66666666666667	3.66666666666667	5.66666666666667	6.33333333333333
5	26	11	10.5	8.33333333333333	6.5	6.66666666666667	7	1	1.33333333333333	1.33333333333333	3.33333333333333	4.33333333333333	5	7
5	27	11	12.5	8	6.5	5.33333333333333	6	1.33333333333333	2	3.66666666666667	4.33333333333333	4.33333333333333	5.66666666666667	6
5	28	11	11	9	7	7	6.33333333333333	1.5	1	5	5.66666666666667	3	4.66666666666667	6.33333333333333
5	29	12	11	8	6	7.33333333333333	7.33333333333333	1	1.66666666666667	1.5	4.5	5	5.5	7.33333333333333
5	30	10.5	12.5	9	6.5	6	7	1.33333333333333	1.33333333333333	1	3.66666666666667	4.66666666666667	5.66666666666667	7
5	31	10	11	7.5	6	6.33333333333333	6.66666666666667	1.5	1	1.33333333333333	3	4	5	6.66666666666667
5	32	10	10.5	9.5	8	6	6.5	1	1.33333333333333	1.66666666666667	4.5	4	5	6.5
5	33	9.5	10	8.5	6.33333333333333	6.5	7	1	1.33333333333333	4.5	3.33333333333333	4	5.33333333333333	7
5	34	10	12.5	9.33333333333333	7	6	5.66666666666667	1	1.66666666666667	4.5	4	4.66666666666667	4.66666666666667	5.66666666666667
5	35	11.5	11	9.5	7	7.33333333333333	6.33333333333333	1.33333333333333	1.5	2	3	3.66666666666667	5	6.33333333333333
5	36	10	12	8	7.33333333333333	5	6	1.5	1.33333333333333	2.66666666666667	3.66666666666667	5.66666666666667	5.25	6
5	37	10.5	11	8.5	6.5	6	6.33333333333333	1.33333333333333	1.5	2	4	4	5	6.33333333333333
5	38	10	11.5	9.5	7	5.66666666666667	7.33333333333333	1	1.25	2.33333333333333	5.33333333333333	5.5	6.33333333333333	7.33333333333333
5	39	10	11	10	7	4.5	8	1.66666666666667	1	3	4.5	5	5	8
5	40	10	11	8	6	6.33333333333333	6.66666666666667	1	1.5	3	3.66666666666667	5.66666666666667	5	6.66666666666667
5	41	11	11	8.5	6.5	6.33333333333333	6	1	2	3.5	3.33333333333333	4.66666666666667	5	6
5	42	10	11	8.66666666666667	6.66666666666667	5.5	6	1.5	1.66666666666667	1.66666666666667	5	4.33333333333333	5.33333333333333	6
5	43	11	11.5	10	7	7.33333333333333	6	1	1.25	2	4.5	5	5	6
5	44	10	11.5	9.5	7	6	7	1.33333333333333	1.66666666666667	2.33333333333333	4	4	5.5	7
5	45	12	11	8	7	6.33333333333333	7.5	1.5	1	2.66666666666667	4	5	5.66666666666667	7.5
5	46	10.5	10.5	9.5	7	6	6.33333333333333	1.25	1	4	4	5.66666666666667	5.33333333333333	6.33333333333333
5	47	10	9	8.5	6.5	6	7.66666666666667	2	2.5	2.33333333333333	3.33333333333333	4	5	7.66666666666667
5	48	11	10.5	10	8	5.33333333333333	8.5	1.33333333333333	1	2.33333333333333	5	4.5	5.75	8.5
6	1	10.5	11.25	12.125	10.625	9.5	8.2	10.5	8.83333333333333	10	9.16666666666667	10.1666666666667	11.75	11
6	2	9.33333333333333	13.375	13	11.375	10.25	9.66666666666667	9.33333333333333	10	9.16666666666667	9.83333333333333	10.25	10.5	11.75
6	3	10	12.5	12.25	11.5	9.875	9.75	10	9.625	10.6666666666667	10.3333333333333	11.25	9	12
6	4	10.1666666666667	12.375	12.8333333333333	11	10.125	9.375	10.1666666666667	9.5	10.3333333333333	9.5	8.16666666666667	10.5	11
6	5	11.3333333333333	12.6666666666667	11.75	11.25	10.3333333333333	9.125	11.3333333333333	9.16666666666667	9.33333333333333	10	9.75	10	13.5
6	6	10.3333333333333	13.5	11.25	11.5	9.5	9.375	10.3333333333333	9.16666666666667	8.16666666666667	9.66666666666667	11.25	10.5	12
6	7	10.1666666666667	12.8333333333333	12.3333333333333	10.875	9.875	9	10.1666666666667	8.33333333333333	9.5	10	9	11.75	12
6	8	10.6666666666667	13	10.5	10.8333333333333	10.375	9.5	10.6666666666667	9.66666666666667	9.75	10	10.1666666666667	10.75	12.25
6	9	10.1666666666667	13	11	11.125	10	9.5	10.1666666666667	9.16666666666667	10.1666666666667	10.1666666666667	9.75	11.5	12
6	10	10.6666666666667	12.625	11.625	10.625	9.625	9.25	10.6666666666667	9.16666666666667	10.8333333333333	10.3333333333333	9.16666666666667	10	12
6	11	10.5	12.6666666666667	11.5	11.5	10	9.375	10.5	9.66666666666667	9.33333333333333	10.1666666666667	10.25	10	10
6	12	10	13	11.625	11.75	9.875	9.33333333333333	10	9	10.5	10	10	10.5	12
6	13	11.6666666666667	12.75	12.6666666666667	11.75	10.3333333333333	9.75	11.6666666666667	9.16666666666667	10.6666666666667	10.5	10.5	10.25	11.5
6	14	10.5	13.3333333333333	11.75	11.3333333333333	10	9.25	10.5	9.16666666666667	10	8.33333333333333	10	12	9.5
6	15	11.6666666666667	13.125	12.5	11.25	9.75	9.625	11.6666666666667	9.33333333333333	11.1666666666667	10.3333333333333	11.25	10.25	11
6	16	11.6666666666667	13	12.25	11.6666666666667	9.125	9.75	11.6666666666667	9.33333333333333	10.625	10	9.16666666666667	10.75	12
6	17	11	13.125	11.875	10.75	10.1666666666667	6.91666666666667	11	9.5	10.3333333333333	9.66666666666667	11	9.5	11.75
6	18	11.8333333333333	13.6666666666667	13	11.25	9.5	9.375	11.8333333333333	9.625	10	10.1666666666667	8.75	11.75	13
6	19	11	12.75	12.375	11.5	10.5	10	11	9.5	10.3333333333333	9.83333333333333	9.83333333333333	10.5	10.5
6	20	10.75	13.5	12.5	11.5	10.125	9.33333333333333	10.75	10	10.3333333333333	10	10.5	12.5	11.25
6	21	10.5	13	12.625	11	9.33333333333333	9.375	10.5	9.83333333333333	8.66666666666667	9.66666666666667	9.75	10.5	11.5
6	22	10.6666666666667	13.5	12.1666666666667	10.875	10.125	9.625	10.6666666666667	9.5	10.1666666666667	10	10.3333333333333	9.5	10.75
6	23	11	12.875	12.25	11.125	10.125	9.75	11	9.16666666666667	9.875	10	9.5	11.5	10.5
6	24	11.5	13	12.3333333333333	11.8333333333333	10.25	9.25	11.5	9	9.5	9.5	10.25	10.25	11.25
6	25	10.1666666666667	13.8333333333333	11.5	10.5	10.1666666666667	9.25	10.1666666666667	8.5	10.1666666666667	10	9.5	9.5	10
6	26	10.6666666666667	12.875	12	11	10	9.625	10.6666666666667	10.6666666666667	10	10	9.33333333333333	11.75	10.5
6	27	10.6666666666667	13.5	12	11.6666666666667	9.625	9.5	10.6666666666667	8.83333333333333	10.5	10.3333333333333	9.75	12	9.5
6	28	11.3333333333333	13.25	11.1666666666667	12	10.3333333333333	9.5	11.3333333333333	10.8333333333333	10.1666666666667	9.33333333333333	10.25	9.25	10.5
6	29	10.1666666666667	13.8333333333333	11.875	11	10.375	10.125	10.1666666666667	9.33333333333333	10.1666666666667	9.66666666666667	10	10.75	9
6	30	11.3333333333333	13.5	12.5	11.6666666666667	10.25	9.625	11.3333333333333	10.3333333333333	9.75	10.1666666666667	10.1666666666667	8.5	10.25
6	31	8.25	13.5	12.375	12.5	10.125	9.25	8.25	9.5	10.3333333333333	9.33333333333333	10.5	11.5	9.5
6	32	9.83333333333333	13.8333333333333	12.1666666666667	11.3333333333333	10.6666666666667	10	9.83333333333333	10.125	10.6666666666667	10.3333333333333	10	10	8.75
6	33	9.5	14.125	12.375	11.5	10.25	10.8333333333333	9.5	10.5	10.8333333333333	8.75	9.75	12.5	10
6	34	10.1666666666667	13.8333333333333	12.5	11.25	9.75	10	10.1666666666667	9.83333333333333	9.83333333333333	10.6666666666667	10.75	9.5	8.75
6	35	9	13.375	12.375	11.3333333333333	10.6666666666667	9.5	9	10.6666666666667	9.83333333333333	10.1666666666667	11.5	11.5	8.25
6	36	10	12.3333333333333	11.3333333333333	11.125	10.75	9.625	10	10.3333333333333	8.66666666666667	9.16666666666667	10	11.5	9
6	37	9.66666666666667	13.5	12.5	10.8333333333333	10.375	10	9.66666666666667	10.3333333333333	10	8.66666666666667	9.75	11.25	8.25
6	38	9.5	13.875	12.6666666666667	10.75	10.3333333333333	9.375	9.5	9.33333333333333	10.3333333333333	8.5	10.5	10	9.83333333333333
6	39	9.5	13.3333333333333	12.75	11.5	10	9.625	9.5	10.6666666666667	10	9.33333333333333	10.1666666666667	11.25	8.25
6	40	10.3333333333333	13.375	11.6666666666667	12	9.875	9	10.3333333333333	10.3333333333333	10.5	8	11	10.5	9.5
6	41	10.1666666666667	13.3333333333333	12.375	11.25	10.6666666666667	10.25	10.1666666666667	9	9.5	9	9.5	13.5	9.25
6	42	9	13.75	12.8333333333333	11	10.125	10	9	8.83333333333333	10.5	8.33333333333333	10.25	10.25	8
6	43	9.25	14	12.125	11.3333333333333	10	9.875	9.25	8.66666666666667	10	8.83333333333333	9.75	13	9.5
6	44	8.83333333333333	14	12.1666666666667	11.25	9.625	10.1666666666667	8.83333333333333	9.16666666666667	9.83333333333333	8	10.25	12.5	8.33333333333333
6	45	9.5	14.6666666666667	12.375	11	9.66666666666667	10.375	9.5	10.1666666666667	9.83333333333333	10.1666666666667	11.5	11	8.25
6	46	10.3333333333333	14.75	12.1666666666667	11	10	9.625	10.3333333333333	9	10.5	8	9.5	11.5	9.16666666666667
6	47	9.5	14.6666666666667	12.375	11.125	10.25	9.625	9.5	9.16666666666667	10.3333333333333	8.5	10.75	11.5	8.33333333333333
6	48	9.66666666666667	13.75	12.6666666666667	12	10.5	9.75	9.66666666666667	9.25	10.1666666666667	9.5	10.75	12.5	9.625
7	1	3	3	2.66666666666667	2	1.66666666666667	1.66666666666667	3	2	1	1	1.5	0	1
7	2	3	2.5	2.5	2	1.5	2	3	2	1	1.5	0	0	2
7	3	4	2.5	2.33333333333333	1.66666666666667	2	1.5	4	2	1	2	0	0	1
7	4	3.5	3	3	1.5	2	1.33333333333333	3.5	1.33333333333333	1	1	1	0	0
7	5	4	3	2.33333333333333	1.66666666666667	2	1	4	1	1	1	0	0	1
7	6	3.5	2.5	2	2	2	1	3.5	1	1	1	2	0	1
7	7	3	3	3	1.66666666666667	2	1.66666666666667	3	1	1	1	0	0	1
7	8	4	3	2.66666666666667	1.5	2.33333333333333	1	4	1	1	2	2	0	1
7	9	4	2.5	2.5	2	2	1.5	4	1	1	1	0	0	1
7	10	3.5	3	2.33333333333333	1.5	2	1.66666666666667	3.5	1.5	1	1	0	0	2
7	11	4	4	2	2	2	1.5	4	1.25	1	1	0	0	1
7	12	4	2.5	2	2.5	2	1.5	4	2	1	1	1	0	1.33333333333333
7	13	4	3	2	2	2	1.33333333333333	4	1	1	2	0	0	1.25
7	14	4	2.5	2	2.5	1.5	1.5	4	1	1	1	0	0	1.2
7	15	4	3	2	2.5	2	1	4	1	1	1	0	0	1
7	16	4	2.5	2.33333333333333	3	2	1.66666666666667	4	1	1	1	0	0	1
7	17	2.5	3	2.5	2.5	2	1.5	2.5	1	1	2	0	0	4
7	18	2.5	3.5	2	2	1.5	1.66666666666667	2.5	1	1	2	0	0	2.75
7	19	2.33333333333333	3	2.33333333333333	2.5	2	1.5	2.33333333333333	1	1	1	0	0	1
7	20	2.5	2.5	2.5	2	2	1.5	2.5	1	1	2	2	0	4
7	21	4	3	2	2	2	2	4	0	1	1	0	0	9
7	22	4	2.5	2.33333333333333	2	2	2	4	0	1.5	1	1	0	6
7	23	4	3	2.5	2	2	1.5	4	0	1.5	1	0	0	1
7	24	1.66666666666667	3	2	2	2	2	1.66666666666667	1	1	1	0	0	2.5
7	25	3.5	3	2	2.33333333333333	2	1.5	3.5	1	1	1	0	0	7
7	26	4	3	2	2	1.33333333333333	1.66666666666667	4	0	1	1	0	0	4
7	27	4	3	2	2	1.5	1.5	4	1	1	1	0	0	1
7	28	2.33333333333333	3	1.66666666666667	2	2	1.5	2.33333333333333	0	1	1	0	0	1
7	29	1.66666666666667	3	2	2.33333333333333	2	2	1.66666666666667	1	1	2	1	0	4.5
7	30	2.33333333333333	3	2	2	2	2	2.33333333333333	0	1	1	0	0	4
7	31	3	3	2	2	2	2	3	1	1	1	0	0	2.33333333333333
7	32	3	3	2	2	2	1.33333333333333	3	0	1	1.5	0	0	4
7	33	3	3	2	2	2	2	3	1	1	1.5	1	0	3
7	34	3	2	2.33333333333333	2	1.5	2	3	1	1	2	0	0	1
7	35	3.5	3	2.5	2	1.66666666666667	2	3.5	1	1	1	0	0	1.33333333333333
7	36	3	3	3	2.33333333333333	2	2	3	1	1	2	0	0	3.5
7	37	3	3.5	2.33333333333333	2	2	2	3	0	1	1	0	0	3
7	38	3	3	3	2	2	2	3	1	1	1	0	0	1
7	39	3	3	3	1.5	1.66666666666667	1.5	3	1	1	2	0	0	7
7	40	3	3	3	1.66666666666667	2	2	3	1	1	2	0	0	3
7	41	3	3.5	2.66666666666667	2	2	2	3	1	1	0	0	0	3
7	42	3	3	3	2	1.66666666666667	1.5	3	1	1	2	0	0	3
7	43	3	3	3	2.5	2	2	3	1	1	1	0	0	2
7	44	3	3	2.66666666666667	2	2	1	3	1	1	2	0	0	3
7	45	3	3.5	3	2	2	2	3	1	1	1	0	0	3
7	46	2	3	2.5	2	2	2	2	1	1	1	0	0	5
7	47	2	3	3	2	1.5	2	2	1	1	2	0	0	1.66666666666667
7	48	2	3	2.5	2	2	1.5	2	1	1.5	1	0	0	3
8	1	3.33333333333333	2	2	2	2	1	1	1.66666666666667	1.33333333333333	1.33333333333333	1	1	1
8	2	4	2.5	2	2	2	1	1.33333333333333	1.5	1	1.33333333333333	1	1	1
8	3	4	2	2	2.33333333333333	2.33333333333333	1	1	1.25	1.66666666666667	1.5	1	1	1
8	4	4	2	2	2	2.5	1	2	1.5	1.5	1.33333333333333	1	1	1
8	5	3.5	2	2	2.33333333333333	2.33333333333333	0	1.5	1.33333333333333	1.33333333333333	1.5	1	1	0
8	6	4	2	2	2.5	2.5	1	1.33333333333333	1.5	1.66666666666667	1	1	1	1
8	7	3	2.5	2	2	2	1	1	1.33333333333333	1.5	1	1	1	1
8	8	4	2	2	2.33333333333333	2.33333333333333	1	1.66666666666667	1.5	1.66666666666667	1.33333333333333	1	1	1
8	9	3.5	2	2	2	2	0	1.5	1.5	2	1.5	1	1	0
8	10	3.5	2	2	2.5	2	1	1.66666666666667	1.33333333333333	1.66666666666667	1.66666666666667	1	1	1
8	11	4	2	2	2.33333333333333	2.33333333333333	1	1.5	2	2	1.33333333333333	1	1	1
8	12	4	2	2	2	2	1	2	1.33333333333333	2	1.5	1	1	1
8	13	4	2	2	2.66666666666667	2.33333333333333	1	1.5	1.5	1.5	1.33333333333333	1	1	1
8	14	4	2	2	2	2.5	1	1.33333333333333	1.66666666666667	1	1.5	1	1	1
8	15	3.5	2	2	2	2.5	1	2	1.5	2	1.33333333333333	1	1	1
8	16	4	2	2	2.33333333333333	2.66666666666667	1	1.33333333333333	1.5	2	1.5	1	1	1
8	17	3.5	2.5	2	2	2	1	1.5	2	1.66666666666667	1.33333333333333	1	1	1
8	18	4	2	2	2.33333333333333	2	1	1.66666666666667	1.5	2	1.5	1	1	1
8	19	3	2	2	2	2.5	1	1.5	1.66666666666667	1.66666666666667	1.33333333333333	1	1	1
8	20	4	2	2	2.5	2	1	1.33333333333333	1	1.5	1	1	1	1
8	21	4	2	2	2.33333333333333	2.33333333333333	1	1.5	1.66666666666667	1.66666666666667	1.5	1	1	1
8	22	3	2	2	2.5	2	1	1.66666666666667	1.5	1.5	1.33333333333333	1	1	1
8	23	4	2	2	2.5	2.33333333333333	1.33333333333333	1.5	1.33333333333333	1.66666666666667	1	1	1	1.33333333333333
8	24	3.5	2	2	2.33333333333333	2	1	1.33333333333333	2	1.5	1.33333333333333	1	0	1
8	25	4	2	2	2	2.33333333333333	1.33333333333333	1.5	2	1.66666666666667	1.33333333333333	1	1	1.33333333333333
8	26	3.5	2.5	2	2	2	1.33333333333333	1.33333333333333	1.33333333333333	1	1	1	1	1.33333333333333
8	27	3.5	2	2	2	3	1	1.5	2	1.66666666666667	1	1	1	1
8	28	3.5	2	2	2	2.33333333333333	1.66666666666667	1.66666666666667	1.66666666666667	1.5	1.5	1	0	1.66666666666667
8	29	4	2	2	2	2.5	1	1.5	1.5	1.66666666666667	1.33333333333333	1	1	1
8	30	4	2.5	2	2	2.66666666666667	2	1.33333333333333	1.33333333333333	1.5	1.33333333333333	1	1	2
8	31	3.5	2.5	2	2.5	2	1.66666666666667	1.5	2	1	1.5	1	1	1.66666666666667
8	32	4	2	2	2	2	1.66666666666667	1	1.5	1.5	1.33333333333333	1	1	1.66666666666667
8	33	3.5	3	2	2	2.33333333333333	1.5	2	1.33333333333333	1.33333333333333	1	1	0	1.5
8	34	4	3	2	2	2.5	1.66666666666667	1.66666666666667	2	1.5	1	1	0	1.66666666666667
8	35	3.5	3	2	2.5	2.33333333333333	1.33333333333333	1	1.66666666666667	2	1.33333333333333	1	0	1.33333333333333
8	36	3.5	3	2	2	2.5	2	1.66666666666667	2	1.5	1	1	1	2
8	37	3.5	3	2	2	2.5	1.66666666666667	1.5	1.66666666666667	1.33333333333333	1.33333333333333	1	1	1.66666666666667
8	38	3.5	3	2	2	2.33333333333333	2	1.33333333333333	2	1	1.5	1	1	2
8	39	3.5	3	2	2	2.5	2	1.5	1.5	1.33333333333333	1	1	0	2
8	40	3	3	2	2	2.66666666666667	1.66666666666667	1.66666666666667	1.33333333333333	2	1	1	1	1.66666666666667
8	41	3	3	2	2	2.5	2	1.5	1.5	1.33333333333333	1.5	1	1	2
8	42	3.5	3.5	2	2.33333333333333	2	2	1.33333333333333	1.66666666666667	1.5	1.33333333333333	1	0	2
8	43	3.5	3	2	2	2	2	1.5	1.5	1.33333333333333	1	1	1	2
8	44	3	3	2	2	2.5	1.66666666666667	1.33333333333333	1.66666666666667	1.5	1	1	1	1.66666666666667
8	45	3.5	3	2	2	2.33333333333333	2	1	1.5	1.66666666666667	1.5	1	1	2
8	46	3	3	2	2	2	2	1.33333333333333	1.5	2	1	1	0	2
8	47	3	3	2	2	2.5	2	1.5	2	1.33333333333333	1.33333333333333	1	0	2
8	48	3.5	3	2	2	2	2	1.33333333333333	1.5	1.5	1	1	1	2
9	1	1	1	3	4	3	2	1	5	5	4	1	0	1
9	2	1.5	1	2	4	2.5	2	1.5	5	5	4	0	0	0
9	3	1	0	2.5	4	3	2	1	5	5.5	4.5	1	0	0
9	4	1	2	4	1	2.5	2	1	5.5	5	5	0	0	0
9	5	1	1	1	5	3	1.5	1	4	5.5	4.5	0	0	0
9	6	1	1	3	4	3	1.5	1	5	5	5	1	0	0
9	7	1	1	1	4	2.5	2.5	1	6	5	4.5	0	0	0
9	8	1	1	3	4	2.5	2	1	5	5	5	0	0	0
9	9	1	1	1	4.5	3	2	1	5	5	5	2	0	0
9	10	1	0	1.5	4	2.5	2.5	1	5	5	5	1	0	0
9	11	1	1	1.5	4	1.33333333333333	2	1	5	4	4.5	1.5	0	0
9	12	1	1	7	5	4	2	1	4.5	5	5	0	0	0
9	13	1	1	1	4	3	2	1	5.5	4.5	4.5	1	0	0
9	14	1.33333333333333	1	3	5	2.5	2.5	1.33333333333333	5	5	5	0	0	0
9	15	1	1	2	4.5	2	2.5	1	4.5	5.5	4	1	0	0
9	16	1.33333333333333	0	2	4	2.5	2.5	1.33333333333333	5	6	5	1	0	0
9	17	1	1	2.33333333333333	4	3	3	1	4.5	5.5	5	1	0	0
9	18	1.33333333333333	1	1	5	2	2	1.33333333333333	4.5	5.5	4	2	0	0
9	19	1.33333333333333	1	2.33333333333333	4.5	2.5	2	1.33333333333333	5	5.5	5	1	0	0
9	20	1	1	5	4	2.5	2	1	5	5	6	1	0	0
9	21	1.33333333333333	1	2	4	2	3	1.33333333333333	5	5	5	1	0	0
9	22	1.33333333333333	1	1.5	4	2.5	2.5	1.33333333333333	5	5	4	0	0	0
9	23	1	1	2	4	3	1	1	6	5	5	1	0	0
9	24	1	1	1	4.5	4	2	1	5	5	5	1	0	0
9	25	1	1	3	5	2	2	1	5	5	4.5	1	0	0
9	26	1.25	1	3	3	2	2	1.25	5	5	4	1	0	0
9	27	2	0	3	4	1.5	2.5	2	5	5	4.5	0	0	0
9	28	1.66666666666667	2	1.5	4	2	2	1.66666666666667	5	5	4	2	0	0
9	29	1.5	2	2	2.5	2	2.5	1.5	5	5	3.5	1	0	0
9	30	1	0	2	5	2.5	4	1	5	5	1	0	0	0
9	31	1.33333333333333	0	4	4	2	1.33333333333333	1.33333333333333	5	4.5	4	0	0	0
9	32	1	1	1	2	3	1.33333333333333	1	5	5	4	1	0	0
9	33	1	0	2.5	4	2	2	1	5	4	2	0	0	0
9	34	1	0	1	3	1	1.5	1	5	4.5	2.5	0	0	1.5
9	35	1	0	2	4	2	2.5	1	5.5	4	2.5	0	0	1
9	36	1	0	1.5	1	2.5	1.5	1	5	4	1	0	0	2
9	37	1	1	1	2.5	1	2	1	5.5	4.5	2	0	0	3.5
9	38	1.25	0	1	5	3.5	2	1.25	5	4	1.66666666666667	0	0	6
9	39	1.25	0	1.5	4	2	2.5	1.25	5	4	1	2	0	8
9	40	1	0	1	3	2	1.5	1	4.5	5.5	1	0	0	9
9	41	1.5	0	1	3	3	2	1.5	5	4	1.5	0	0	8
9	42	2	0	1	1	2	2	2	5	4.5	1.5	0	0	9
9	43	2	0	1	4	2	2.5	2	5	4	1	0	0	7.5
9	44	2.5	0	1	4	1	1	2.5	4.5	4	1	0	0	9
9	45	3.66666666666667	0	1	2.5	2	2	3.66666666666667	5	4	1	0	0	9
9	46	2	0	1	3	2	2	2	5	4	1	0	0	8.5
9	47	2	0	1	1.66666666666667	2.5	1.5	2	5	5	1	0	0	8.5
9	48	2	0	1	3	1	2	2	5	4	1	0	0	8.5
10	1	7	5	3	2	2	2	7	5	6	5	3.66666666666667	4	15.5
10	2	6.5	5	3.5	2.5	2	2	6.5	5	6	5	4	0	9.33333333333333
10	3	8	5	3	2	2.5	2	8	5.5	6	5	4.5	0	8.66666666666667
10	4	5	5	3	2.5	2	2	5	6	6	4.5	3	0	8.66666666666667
10	5	7.5	4	3	2	2.5	2	7.5	5.5	6	5	4.66666666666667	0	5
10	6	7	5	3	2	2	2	7	5	6	5	3.75	0	8.33333333333333
10	7	9	5	3.5	2	2	2	9	5	6	4.5	4	0	7.33333333333333
10	8	8	5	3	2	2.5	3	8	5.5	6	5.33333333333333	4.33333333333333	0	6.66666666666667
10	9	9.5	5	4	1.5	2	2	9.5	5	6	5	4.33333333333333	0	5.25
10	10	6	5	3	2	2.5	2	6	5	6	4.5	4.33333333333333	0	6.33333333333333
10	11	7	5	4	2	2	2	7	5	6	5.5	4.25	0	5.2
10	12	8	5	3	2	2	3	8	5.5	6	5	6	0	3.75
10	13	8.5	5	3	2	2.5	2.5	8.5	5	6.5	5	4.5	0	3.75
10	14	8	5	4	2	2.5	2.5	8	5	6	5.5	5	0	4.66666666666667
10	15	8.5	5	3	2	3	3	8.5	6	6	5.33333333333333	9	0	5
10	16	8.5	5	4	2	2	2	8.5	6	6	5	4.5	0	4.33333333333333
10	17	8.5	5	3.5	2	2.5	2	8.5	5.5	6	5	4.75	0	3.66666666666667
10	18	7	5	3.5	2	2	2	7	5	6.5	5	4.5	0	2.6
10	19	7	5	4	2	2	2	7	5.5	6	4.5	4.75	0	3
10	20	7.5	5	3	2	2	2	7.5	5	6	4	4.5	0	4
10	21	9	5	3.5	1.5	2.5	2	9	6	6	4.5	5	0	5.5
10	22	7.5	5	4	2	2	2	7.5	5	6.5	4	8	17	3.5
10	23	7.5	5	4	1	2	3	7.5	5.5	6	3.5	5	0	3
10	24	9	5	3.5	2	2	2	9	5	6	4.5	4.66666666666667	0	4
10	25	7	5	4	2	2	2	7	5	6	4	4.66666666666667	0	4.25
10	26	8	5	4	2	2	2	8	5	6	4.5	4.33333333333333	0	3.5
10	27	7	5	4	1.5	2	2	7	5	6	4	7	0	3.5
10	28	8.5	4.5	4	2	2	2	8.5	5	6	4	5.33333333333333	0	4.33333333333333
10	29	10.5	5	4	2	2	2	10.5	5	6	3.66666666666667	4.66666666666667	0	3.33333333333333
10	30	7.5	4.5	4	1.5	2	2	7.5	5	6	3	5	0	3
10	31	9.5	5	4	2	2.5	2	9.5	5.5	6	3.5	4.33333333333333	0	3
10	32	11	4.5	4	1	2	3	11	5	6	3.5	6.66666666666667	0	4.25
10	33	10.5	4	4	2	2	2	10.5	4.5	6	3.5	5	0	3.33333333333333
10	34	9	4	4	2	2	2.5	9	5	5.5	3.5	5.33333333333333	0	3.33333333333333
10	35	11	5	4	2	2	2	11	5	6	3	5.5	0	4
10	36	11	4.5	4	2	2	2	11	5	6	3.33333333333333	8	0	3.66666666666667
10	37	10.5	4	4	2.5	2	3	10.5	5.5	6	3.5	4.66666666666667	0	4.66666666666667
10	38	8	4	4	2	2.5	2	8	5	6	3	8.5	0	4.33333333333333
10	39	11.5	4.5	4	2	2	2	11.5	5	5.5	3.5	5.5	0	4.33333333333333
10	40	11.5	4	4	2	2.5	2	11.5	6	6	3	5.5	0	6.66666666666667
10	41	12	4	4	2	2.5	2	12	5	5.5	3	5.33333333333333	0	4.66666666666667
10	42	11.5	4	4.5	2	2	3	11.5	5	6	4	6	0	5
10	43	14	4	4.5	2.5	2	2	14	5	5.5	3.5	6	3.33333333333333	5.33333333333333
10	44	11.5	4	5	2	2	2.5	11.5	5	5.5	3.5	12	2.33333333333333	5
10	45	13	4	4	3	2	2	13	5	5.5	3	9	0	5.33333333333333
10	46	13.5	4	4.5	3	2.5	2	13.5	5	5.5	3.5	12	3	6
10	47	13	4	4	2.5	2	2	13	5	5.5	3	6.5	0	7
10	48	14.5	4	4	3	2	2	14.5	5	5	3	8.66666666666667	2	5
11	1	1.11111111111111	3.33333333333333	3.66666666666667	1.5	1.75	1	1	1	1	1	0	0	1
11	2	1	3.66666666666667	3.33333333333333	1.33333333333333	1.66666666666667	0	1	1.33333333333333	1	1	0	0	0
11	3	1	4.33333333333333	3.33333333333333	1.66666666666667	1.5	0	1.33333333333333	1	1	1	0	0	0
11	4	1	4	3.66666666666667	1.66666666666667	1.33333333333333	0	1	1.5	1	1	0	0	0
11	5	1	4	3.66666666666667	1.66666666666667	1.66666666666667	0	1	1	1	1	0	0	0
11	6	1.125	3.33333333333333	4	1.33333333333333	1.33333333333333	0	1	1	1	1	0	0	0
11	7	1	4.5	3.66666666666667	1.66666666666667	1	0	1	1	1	1	0	0	0
11	8	1.25	3	4.33333333333333	1.66666666666667	1.66666666666667	0	1	1	1	1	0	0	0
11	9	1.22222222222222	3.5	3	1.5	1.5	0	1	1	1	1	0	0	0
11	10	1	3.33333333333333	3.66666666666667	1.33333333333333	1.5	0	1	1	1	1	0	0	0
11	11	1	4	3.5	1.33333333333333	1.66666666666667	0	1	1	1	0	0	0	0
11	12	1	3.5	4	1.66666666666667	1.5	0	1	1	1	1	0	0	0
11	13	1	4	3.66666666666667	1.66666666666667	1.33333333333333	0	1	1	1	1	0	0	0
11	14	1	3	3.66666666666667	1.33333333333333	1.5	1	1	1	1	1	0	0	1
11	15	1.125	3.5	3	1.66666666666667	1.66666666666667	0	1	1.5	1	1	0	0	0
11	16	1	3.33333333333333	2.5	1.75	1.33333333333333	0	1	1	1	1	0	0	0
11	17	1	3.33333333333333	4	1.33333333333333	1.5	1	1	1	1	1	0	0	1
11	18	1	2.5	3	1.33333333333333	1.66666666666667	0	1	1	1	1	0	0	0
11	19	1	2.25	3	1.66666666666667	1.5	1	1	1	1	1	0	0	1
11	20	1	4	3.33333333333333	2	1.33333333333333	1	1	1	1	1	0	0	1
11	21	1	3	3.5	1.33333333333333	1.33333333333333	1	1	1	1	1	0	0	1
11	22	1	2.5	4.33333333333333	1.66666666666667	1.66666666666667	1	1	1	1	1	0	0	1
11	23	1	2.66666666666667	3.33333333333333	1.25	1.66666666666667	1	1	1	1	1	0	0	1
11	24	1	2.5	3	1.66666666666667	1.5	1	1	1	1	1	0	0	1
11	25	1	1.75	4	1.66666666666667	1.33333333333333	1	1	1	1	1	0	0	1
11	26	1	2.5	4	1.66666666666667	1.66666666666667	1	1	1	1	1	0	0	1
11	27	1	1.25	4.5	1.33333333333333	1.5	1	1	1	1	1	0	0	1
11	28	1	1.75	3.33333333333333	1.75	1.33333333333333	1	1	1	1	1	0	0	1
11	29	1	2.66666666666667	3	1.33333333333333	1.66666666666667	1	1	1	1	1	0	0	1
11	30	1	1	2.66666666666667	1.5	1.66666666666667	1	1	1	1	0	0	0	1
11	31	1	1.33333333333333	2.33333333333333	2.33333333333333	1.66666666666667	1	1	1	1	0	0	0	1
11	32	1	1.5	2.66666666666667	1.25	1.33333333333333	1	1	1	1	1	0	0	1
11	33	1	1	2	1	1.5	1	1	1	1	1	0	0	1
11	34	1	1	2.66666666666667	1.66666666666667	2	1	1	1	1	1	0	0	1
11	35	1	1	3.66666666666667	1.66666666666667	1.5	1	1	1	1	1	0	0	1
11	36	1	1	2.66666666666667	1.66666666666667	1.5	1	1	1	1	1	0	0	1
11	37	1.11111111111111	1	3.33333333333333	1.66666666666667	1.66666666666667	1	1	1	1	0	0	0	1
11	38	1	1	3.5	1.66666666666667	1.5	1	1	1	1	1	0	0	1
11	39	1	1.33333333333333	2.33333333333333	1.66666666666667	1	1	1	1	1	0	0	0	1
11	40	1	1.5	2.33333333333333	1.66666666666667	1.33333333333333	1	1	1	1	1	0	0	1
11	41	1.11111111111111	1	2.33333333333333	1	1.5	1	1	1	1	0	0	0	1
11	42	1.22222222222222	2	3	1.66666666666667	1.66666666666667	1	1	1	1	0	0	0	1
11	43	1	1.66666666666667	2.33333333333333	1.33333333333333	1.75	1	1	1	1	1.5	0	0	1
11	44	1	2	2.66666666666667	1.33333333333333	2	1	1	1	1	1	0	0	1
11	45	1	1.5	2	1.66666666666667	1.5	1	1	1	1.5	0	0	0	1
11	46	1	1.5	2.5	1.33333333333333	1.5	1.25	1	1	0	0	0	0	1.25
11	47	1	1.33333333333333	2	2	1.66666666666667	1.25	1	1	1	1	0	0	1.25
11	48	1	2	2	1.66666666666667	1.5	1.25	1	1	1	0	0	0	1.25
12	1	2.4	3.33333333333333	2.66666666666667	1	1	1	2	1.25	1	1	0	0	1
12	2	5.66666666666667	3	2.33333333333333	1	1	0	1.5	1.33333333333333	1	1	0	0	0
12	3	3.5	3.66666666666667	2	1	1	0	1.66666666666667	1.33333333333333	1	1	0	0	0
12	4	4.5	3.33333333333333	1.66666666666667	1	1	1	2.33333333333333	1.66666666666667	1	1	0	0	1
12	5	5.66666666666667	3.33333333333333	2.33333333333333	1	1	0	2	1.66666666666667	1	1	0	0	0
12	6	2.75	3.5	2.33333333333333	1	1	1	1.66666666666667	1	1	1	0	0	1
12	7	3.75	3.33333333333333	2.66666666666667	1	1	1	2	1.33333333333333	1	1	0	0	1
12	8	5	3.33333333333333	2.33333333333333	1	1	1	1.66666666666667	1.33333333333333	1	1	0	0	1
12	9	3.6	2.66666666666667	2	1	1	1	1.66666666666667	1	1	1	0	0	1
12	10	6	3.66666666666667	2.33333333333333	1	1	1	1.66666666666667	1	1	1	0	0	1
12	11	3	3.5	2.33333333333333	1	1	1	1.66666666666667	1	1	1	0	0	1
12	12	6	3.33333333333333	2.33333333333333	1	1	1	2	1.33333333333333	1	1	0	0	1
12	13	5.33333333333333	3.66666666666667	2.66666666666667	1	1	1	1.66666666666667	1.33333333333333	1	0	0	0	1
12	14	4	3.5	2	1	1	2	2	1	1	1	0	0	2
12	15	3.66666666666667	2.66666666666667	2	1	1	1	1.66666666666667	1	1	0	0	0	1
12	16	4.33333333333333	3.33333333333333	2	1	1	1.5	1.66666666666667	1	1	0	0	0	1.5
12	17	4	3.33333333333333	2.5	1	1	1.5	1.33333333333333	1.33333333333333	1	1	0	0	1.5
12	18	3.75	3	2	1	1	1	1.33333333333333	1	1	1	0	0	1
12	19	4.5	3	2.5	1	1	2	1.66666666666667	1	1	0	0	0	2
12	20	4.5	3	2.33333333333333	1	1	2	2	1.33333333333333	1	1	0	0	2
12	21	4.66666666666667	2.33333333333333	3	1	1	1	1.66666666666667	1	1	0	0	0	1
12	22	6	3	2	1	1	1	2	1	1	0	0	0	1
12	23	4.5	3	2.66666666666667	1	1	1	2	1	1	1	0	0	1
12	24	3.5	3.33333333333333	2.66666666666667	1	1	1	1.66666666666667	1	1	0	0	0	1
12	25	3.33333333333333	3.33333333333333	3.33333333333333	1	1	1	1.66666666666667	1	1	0	0	0	1
12	26	3.75	3	3	1	1	1	2.33333333333333	1	1	0	0	0	1
12	27	4	3.33333333333333	3	1	1	1	2	1	1	0	0	0	1
12	28	3.66666666666667	3.33333333333333	3	1	1	1	1.33333333333333	1	1	0	0	0	1
12	29	6	3.5	3.33333333333333	1	1	1	2	1	1	0	0	0	1
12	30	6	3.66666666666667	4	1.66666666666667	1	1	1.66666666666667	1	1	0	0	0	1
12	31	4	3.33333333333333	2.66666666666667	1	1	1	1.33333333333333	1	1	0	0	0	1
12	32	4.5	3.5	3.66666666666667	1	1	1	2	1	1	0	0	0	1
12	33	3	3.66666666666667	3.66666666666667	1	1	1	1.66666666666667	1	1	0	0	0	1
12	34	4	3.5	3	1	1	1	1.33333333333333	1	1	0	0	0	1
12	35	4	3.66666666666667	3.66666666666667	1	1	1	1.33333333333333	1	1	0	0	0	1
12	36	4	4	4	1.5	1	1	2	1	1	0	0	0	1
12	37	4	4	3.66666666666667	1.33333333333333	1	1	1.66666666666667	1	1	0	0	0	1
12	38	3.5	3.33333333333333	3.66666666666667	1.33333333333333	1	1	1.33333333333333	1	1	0	0	0	1
12	39	4	4	3.66666666666667	1	1	1	1.66666666666667	1	1	0	0	0	1
12	40	4.66666666666667	4	3.33333333333333	1.33333333333333	1	1	2	1	1	0	0	0	1
12	41	4	3.5	4	1.25	1	1	1.66666666666667	1	1	0	0	0	1
12	42	4.33333333333333	4.33333333333333	3.5	1	1	1	2	1	1	0	0	0	1
12	43	5	4.5	3.5	1.66666666666667	1	1	1.33333333333333	1	1	0	0	0	1
12	44	4.66666666666667	4.5	3.5	1	1	1	2	1	1	0	0	0	1
12	45	5.33333333333333	4.33333333333333	3.66666666666667	1	1	1	1.66666666666667	1	1	0	0	0	1
12	46	5	4	3.66666666666667	2	1	1	1.66666666666667	1	1	0	0	0	1
12	47	5	4.33333333333333	3	1.66666666666667	1	1	2.33333333333333	1	1	0	0	0	1
12	48	4.33333333333333	4	4	1.33333333333333	1	1	1	1	1	0	0	0	1
13	1	0	1	10	0	4	3	0	8	4	4	0	0	23
13	2	0	0	0	0	3	4	0	0	0	0	0	0	0
13	3	0	0	10	0	4	0	0	9	4	0	0	0	0
13	4	0	3	9	0	0	5	0	0	0	2	0	0	0
13	5	19	0	0	0	3	0	19	0	6	0	0	0	19
13	6	0	0	10	0	3	4	0	10	0	0	0	0	0
13	7	0	0	0	0	0	0	0	0	3	4	0	0	0
13	8	0	0	9	1	5	5	0	0	0	0	0	0	17
13	9	20	2	0	0	4	4	20	8	0	0	0	0	0
13	10	0	0	10	0	0	0	0	0	4	2	0	0	0
13	11	0	0	0	0	3	2	0	0	0	0	0	0	17
13	12	0	0	8	0	3	5	0	9	3	0	0	0	0
13	13	15	0	0	0	4	0	15	0	0	1	0	0	0
13	14	0	0	0	0	0	4	0	0	0	0	0	0	18
13	15	0	0	9	0	3	0	0	6	5	0	0	0	0
13	16	0	3	0	0	1	4	0	0	0	2	0	0	19
13	17	12	0	10	0	3	0	12	0	0	0	0	0	0
13	18	0	0	0	0	0	4	0	13	5	0	0	0	0
13	19	0	0	9	0	5	3	0	0	0	2	0	0	16
13	20	0	0	0	0.5	0	0	0	0	3	0	0	0	0
13	21	0	0	9	0	3	4	0	4	0	0	0	0	16
13	22	15	0	0	0	3	0	15	0	1	0	0	0	0
13	23	0	0	7	0	4	4	0	0	0	0	0	0	17
13	24	0	0	0	0	0	3	0	10	5	1	0	0	0
13	25	0	2	7	0	4	0	0	0	0	0	0	0	18
13	26	19	0	0	0	0	6	19	0	0	0	0	0	0
13	27	0	0	6	0	4	0	0	6	4	0	0	0	18
13	28	0	0	0	0	4	3	0	0	0	0	0	0	0
13	29	0	0	7	0	0	5	0	5	0	0	0	0	16
13	30	22	0	0	0	5	0	22	0	5	0	0	0	0
13	31	0	0	0	0	2	4	0	0	0	0	0	0	18
13	32	0	0	7	0	0	0	0	5	0	0	0	0	0
13	33	0	0	0	0	5	5	0	0	2	0	0	0	18
13	34	24	0	6	0	0	0	24	0	0	0	0	0	0
13	35	0	0	0	0	4	5	0	6	0	0	0	0	17
13	36	0	0	0	0	0	0	0	0	6	0	0	0	0
13	37	23	0	5	0	5	5	23	0	0	0	0	0	18
13	38	0	0	0	1	4	5	0	7	0	0	0	0	15
13	39	0	0	0	0	0	0	0	0	2	0	0	0	0
13	40	11	0	5	0	8	4	11	5	0	0	0	0	16
13	41	0	0	0	0	0	0	0	0	0	0	0	0	0
13	42	0	0	6	0	5	5	0	0	3	0	0	0	15
13	43	22	0	0	1	0	0	22	6	0	0	0	0	15
13	44	0	0	0	0	3	6	0	0	0	0	0	0	0
13	45	0	0	0	0	0	2	0	0	3	0	0	0	16
13	46	0	0	5	0.5	5	4	0	0	0	0	0	0	0
13	47	11	0	0	0	4	0	11	6	2	0	0	0	15
13	48	0	0	0	0	0	3	0	0	0	0	0	0	15
14	1	1	4	8.5	9	6	10	1	2	5	3	1	1	1
14	2	1	3	7	7	5	10	1	7	2	1	1	0	0
14	3	1	6	7	10	6	8	1	0	5	3	0	1	0
14	4	1	0	8	10	9	0	1	6	0	1	0	0	0
14	5	1.5	5.5	11	10	0	8	1.5	0	4	1	1	0	0
14	6	1	4	5	0	8	5	1	5	4	1	0	0	0
14	7	1	5	9	11	0	10	1	0	0	1.5	0	0	1
14	8	1	5	9	10	3	0	1	1	3	0	1	0	0
14	9	1	5	8	0	6	9	1	6	4	1	0	0	0
14	10	1	4	6.5	9	4	9	1	3	0	1	1	0	0
14	11	1	5	11	9	0	8	1	0	5	1	0	0	0
14	12	2	5	0	13	7	5	2	2.5	4	1	1	0	1
14	13	1	5	13	0	5	0	1	0	4	1	0	0	1
14	14	1	5	10	6	6	7	1	4	0	1	1	0	1
14	15	2	6	9	9	8	9	2	0	6	1	1	0	1
14	16	1	3	9	13	0	5	1	3	1	1	2.33333333333333	0	1
14	17	2	4	7	0	7	6	2	1	5	1	1	0	0
14	18	1	5	9	12	6	8	1	2	0	1	0	0	1
14	19	1	0	7	6	0	8	1	1	2	1	0	0	1
14	20	1	5	5	7	5	11	1	5	4	1	0	0	1
14	21	1	4	9	8	6	0	1	0	0	1	1	0	1
14	22	1	5	6	11	6	9	1	5	4	1	0	0	1
14	23	1	5	7	0	0	6	1	0	4	1	1	0	1
14	24	0	6	10	10	9	10	0	5	0	1	1	0	1
14	25	1	6	10	8	0	8	1	0	1.5	1	0	0	1
14	26	1	4	9	9	10	7	1	6	0	1	0	0	1
14	27	1	6	8	7	0	7	1	0	5	1	0	0	1
14	28	1	5	9	12	7	9	1	5	1	0	0	0	1
14	29	1	4	9	0	5	5	1	0	1	1	0	0	1
14	30	1	5	11	6	0	7	1	3	1	1	0	0	1.33333333333333
14	31	1	5	9	13	6	7	1	0	2	0	0	0	1
14	32	1	5	8.5	0	8	5	1	4	0	2	0	0	1.5
14	33	0	5	8	12	0	4	0	3	4	0	0	0	1
14	34	0	3	11	8	6	5	0	0	1	1	0	0	1
14	35	0	4	11	10	6	7	0	6	3	1	1	0	1
14	36	0	1	10.5	6	0	9	0	1	0	1	0	0	5
14	37	0	5	8	9	10	8	0	1	3	0	0	0	3
14	38	0	6	10	7	7	2	0	3	3	1	0	0	1
14	39	0	4	10	8	0	3	0	0	0	1	0	0	5
14	40	0	4	9	10	7	4	0	6	3	1	0	0	2
14	41	0	5	10	12	8	2	0	1	3	0	0	0	3.5
14	42	0	3.5	9	0	0	8	0	3	4	1	0	0	5
14	43	1	4	9	12	7	5	1	0	0	1	0	0	3
14	44	0	6	9	9	9	9	0	1	1	0	0	0	5
14	45	1	4	11	11	0	5	1	1	1	1	0	0	2
14	46	0	2.5	10	4	5	7	0	5	1	0	0	0	3
14	47	1	3	14	11	10	5	1	0	1	1	0	0	3.5
14	48	1	4	11	9	0	0	1	4	1	0	0	0	3
15	1	1.33333333333333	4.5	3	2	2	2	1.33333333333333	2.5	4	2	1	1	1
15	2	1.33333333333333	5	2	1.5	2	2	1.33333333333333	2.5	3	1	0	0	1
15	3	1.66666666666667	5	3	2	2	2	1.66666666666667	3	5	3	1	1	0
15	4	1	5	2	1	2	2	1	3	4	2	0	0	1
15	5	1.33333333333333	5	3	2	2	2	1.33333333333333	3	2	3	1	0	0
15	6	1	5	2	1	2	0	1	2.5	4	3	0	1	1
15	7	1.25	5	3	1	2	2	1.25	3	3	1	1	0	1
15	8	1.66666666666667	5	3	2	2	2	1.66666666666667	3	3.5	1	0	1	0
15	9	1	5	2.5	1	2	2	1	3	4	1	1	0	1
15	10	1.25	5	2.5	2	2	0	1.25	3	2	2	0	0	1
15	11	1.25	5	2	1	2	2	1.25	3	3	4	1	1	0
15	12	1.5	5	2.5	2	2	2	1.5	2.5	3.5	3	0	0	1
15	13	1	5	3	1.5	2	2	1	2.5	2	1	0	1	1
15	14	1	5	2.5	1	2	2	1	3	3	3	1	1	0
15	15	2	5	3	1	2	2	2	2	3	2	0	0	0
15	16	1.33333333333333	5	3	1	2	2	1.33333333333333	4	3	4	1	0	0
15	17	1	5	2	1	2	0	1	2.5	4	3	0	1	0
15	18	1	5	2.5	2	2	2	1	3	3	4	1	0	0
15	19	2	5	3	1	2	2	2	3	3	1	0	1	1
15	20	2	5.5	2.5	1.5	2	2	2	2	1	1	0	0	0
15	21	1	4	2	1	2	0	1	2.5	4	2	1	0	0
15	22	1.66666666666667	5	2.5	1.5	1	2	1.66666666666667	3	2	3	0	1	0
15	23	1.66666666666667	5	2.5	1	2	2	1.66666666666667	3	3	2	0	0	0
15	24	2.5	5	3	1	2	2	2.5	3	3	1	1	1	0
15	25	2.66666666666667	5	3	2	2	0	2.66666666666667	3	3	2.5	0	0	0
15	26	3	5	3	2	1.5	2	3	3	2	3	0	0	0
15	27	3.33333333333333	5	3	1	2	2	3.33333333333333	2.5	3	0	0	1	0
15	28	4	5	2	2	1.5	2	4	2	1	2	0	0	0
15	29	3.5	5	3	2	2	2	3.5	2	3	2.5	0	0	0
15	30	4	6	3	2	2	2	4	2.5	1	0	0	1	0
15	31	4	6	3	1.5	1.5	2	4	2	2.5	2	0	0	0
15	32	4	6	3	2	2	2	4	3	0	2	0	0	0
15	33	4.5	6	3	2	2	2	4.5	3	3	2	0	1	0
15	34	5	6	2.5	1	2	2	5	3	3	0	0	0	0
15	35	4	6	3	2	2	2	4	3	3	2	0	0	0
15	36	4.5	6	2.5	2	2	2	4.5	3	3	2	0	1	0
15	37	5	6	3	1.5	2	2	5	1	1	1	0	0	0
15	38	4	6	2	2	2	2	4	2	3	2	0	1	0
15	39	5	5.5	3.5	2	1.5	2	5	3	2	2	0	0	0
15	40	4	6	3	1.5	2	2	4	1	3	0	0	1	0
15	41	4	7	4	2	1.5	0	4	1	2	2	0	0	0
15	42	4	6	4	2	2	2	4	3	1	2	0	0	0
15	43	4	6	3.5	2	1.5	2	4	2	1	2	0	1	1
15	44	3.5	6	4	2	1	2	3.5	0	3	0	0	0	0
15	45	4	6	3.5	2	1.5	2	4	3	1	4	0	1	0
15	46	3.5	6	3	2	2	2	3.5	1	1	0	0	0	0
15	47	3	6	4	2	2	2	3	1.5	1	3	0	1	0
15	48	4	6	4	2	1.5	2	4	1	2	0	0	1	0
