# Supplementary material for: Two central pattern generators from the crab, Cancer borealis, respond robustly and differentially to extreme extracellular pH
Source: eLife journal article supplement (doi:10.7554/elife.41877), 2018-12-28
Supplement: supp [file elife-41877-supp-v1.zip › elife_poa_e41877_Figure_7_source_data_4.csv]

prep	bin	pH78_1	pH55	pH61	pH67	pH72	pH78_2	pH78_3	pH83	pH88	pH93	pH98	pH104	pH78_4
1	1	0.108018412116425	0.172170501212787	0.252410036942665	0.245159311617138	0.247573796300274	0.165172645180129	0.108018412116425	0.0813923757643613	0	0.285035064382428	0.134197497993815	0.113652641422687	2.87188059663679e-05
1	2	0.091238801886301	0.16258369336749	0.199858321003282	0.0679405559595354	0.209763283637095	0.193642562838898	0.091238801886301	0.180348882518328	2.94820936434567e-05	0.0905940691883347	0.133131249566432	0.0804336646294492	0.0301391976169209
1	3	0.112210841715841	0.186651803429808	0.205381702943354	0.230456291791842	0.239928627517935	0.186462293172054	0.112210841715841	0.118003332445276	0.0737455373891096	0.11021164022548	0.0930108472985533	0.0820412818456517	0.0719008413353265
1	4	0.0983256347693038	0.146841389067605	0.195160391178743	0.193930727644509	0.195574669110619	0.219969054072387	0.0983256347693038	0.108908190049252	2.56081152057345e-05	0	0.0882308481200908	0.0307584049328037	0.064123643225746
1	5	0.0990487802341789	0.16726949906671	0.222593437232656	0.177834868174444	0.199703859913366	0.177562580570318	0.0990487802341789	0.175999935403338	0.353423742185833	0.10309178150396	0.0959963549238361	0.0641238016037203	2.40827906260818e-05
1	6	0.0993528680747213	0.175512778089029	0.197599595863413	0.265049930567983	0.253442412825	0.115091464184162	0.0993528680747213	0.107560232573775	0.0187250364621343	0.101692630622544	0.106102717229709	0.0318264653249668	0.0174060264206122
1	7	0.108553479420246	0.176651045261014	0.215564914666523	0.207521819856394	0.203867244862741	0.21620187929085	0.108553479420246	0.133637494589132	1.67689854266314e-05	0.141413155347792	0.037333762778485	0.0978728313097304	0.0245384346152154
1	8	0.0908050524003267	0.144009334867181	0.217291477266124	0.236485822981233	0.199558120850443	0.134140398148164	0.0908050524003267	0.105197072145596	0.103321358707756	0.166066615962072	0.14232036044211	0.0588213544191994	0.0217241085335063
1	9	0.0893445658427064	0.167817807308877	0.241925521532897	0.202442143592853	0.237976285104939	0.235122925124052	0.0893445658427064	0.111812931762276	0.0870567705134256	0.0619491907521403	0.091376034177921	0.173905919355451	0.103401383934525
1	10	0.0992826757173534	0.164293313948296	0.215049063391722	0.220280374320262	0.199884392692256	0.212613834464437	0.0992826757173534	0.108651561106155	0.0997890220836392	2.43437924367105e-05	0.044602879720983	0.0892018519459533	3.36963020803304e-05
1	11	0.110177835845476	0.143838076085102	0.204216598047388	0.174163935115092	0.240382439791864	0.107624667226554	0.110177835845476	0.112359386840826	0.0844123428339346	0.155098762095567	0.0985237045849001	0.08191383721139	1.51667290720176e-05
1	12	0.0971911067655757	0.152816936111107	0.231825217513539	0.250959138698618	0.198308227346925	0.213883783924853	0.0971911067655757	0.0640672620883926	0.0572205145392813	0.0419314005516798	0.0864689388903254	0.0539766738342176	3.01482800864536e-05
1	13	0.102247401613321	0.153386873691974	0.241268477900163	0.214157994280737	0.226229050536727	0.213364369636212	0.102247401613321	0.210140334521035	0.0782108504746528	0.181122511834313	0.0838239839357148	0.0713326739201099	0.0268598275810253
1	14	0.0937706603542355	0.129784183072232	0.227399836481074	0.184299218678105	0.226227878702536	0.160945044050749	0.0937706603542355	0.114714891916037	0.11069795674786	0.0771792402235063	0.0661122233438803	0.127902657386959	1.1867168410941e-05
1	15	0.100090606094032	0.123840269518066	0.214946051472673	0.209642814802915	0.205962253547505	0.176504783426363	0.100090606094032	0.120699945889207	0.142640021456706	0.0862386247205073	0.181922378083921	0.0483186577776569	0.0623391732748444
1	16	0.091954477935115	0.140369670588238	0.205974729965531	0.18309074532385	0.214553475479008	0.172189479893251	0.091954477935115	0.239626433664908	0.0787043520337011	9.59890035029457e-06	0.0928865885522725	0.0892602534729086	1.71399488312147e-05
1	17	0.093637369965743	0.12236401047151	0.20542498030296	0.227350195233149	0.179229200140507	0.271114258414925	0.093637369965743	0.179551488511757	0.117489116228012	0.0638942263026761	0.0840439304407232	0.0817274078893666	2.75665484692709e-05
1	18	0.0883991572109144	0.1379893913572	0.214011121981169	0.147586929555546	0.226200845534057	0.232649177361149	0.0883991572109144	0.123067622170775	0.110596149971925	0.0994970859966278	0.0337157676695353	0.0660218563884704	3.07363376815828e-05
1	19	0.105125313784517	0.103821257047402	0.209886713296417	0.196505454176279	0.248718016371875	0.206687627754259	0.105125313784517	0.174136579651535	8.70965578350738e-06	9.57022969540063e-06	0.191724053374749	0.0126448859186528	0.0313751294606835
1	20	0.135099453581323	0.112692118831695	0.219507999096122	0.228635193888209	0.183852667203681	0.243705331405422	0.135099453581323	0.119879754685165	0.107861660140306	0.0897261506952428	0.0651539601659233	0.0539953366594328	0.0175271325790448
1	21	0.100816866739678	0.158087237455528	0.210802713405386	0.184498073809455	0.215144055606248	0.167275691348256	0.100816866739678	0.112033760236506	2.15347510725969e-05	0.179410861441296	0.135071844467874	0.0256431022668049	3.14134389749472e-05
1	22	0.108857063685705	0.093072941291885	0.255734860103849	0.161315093538782	0.239380108556314	0.220350135478139	0.108857063685705	0.120699378573369	3.40653527222928e-05	0.0290763458330885	0.0525346279847182	0.0525867217180145	2.93335684416715e-05
1	23	0.115867726224048	0.109318205125282	0.192523221974282	0.136309635232983	0.226875043501208	0.154402478237633	0.115867726224048	0.161954188452666	3.37845892037587e-05	0.083612532033064	0.127782662770331	0.195528588947415	0.0369597698749205
1	24	0.114065146121843	0.0983770801815236	0.217894428935819	0.102200090346556	0.220446496921753	0.213444194776761	0.114065146121843	0.143367618556084	3.26859071099706e-05	0.111135921063608	0.077475266397787	0.0399644294069099	0.02771903953487
1	25	0.110564417674315	0.119716329134811	0.224803337784661	0.176833598492562	0.252269708588652	0.212782037573134	0.110564417674315	0.144026102074766	3.05312923856601e-05	0.0657110069399165	0.060633446273684	0.0563435162458913	2.40802226210789e-05
1	26	0.111029038390655	0.0948460607840037	0.185522102337828	0.210906396242515	0.207372662572275	0.225289401386629	0.111029038390655	0.126973916401962	2.51840704695878e-05	0.0828199074707598	0.0896945836950295	0.0709847716226155	3.12324780542937e-05
1	27	0.0874227785188138	0.113544368802922	0.217595757253095	0.206107323468239	0.228821205720026	0.179625429884259	0.0874227785188138	0.0825167654250828	3.87403402297714e-05	0.0502347407761973	0.0238032930906795	0.0782055000759711	3.07795770190939e-05
1	28	0.108924896529906	0.101531879906246	0.206148141346435	0.243754060183143	0.194502765569898	0.166470072505646	0.108924896529906	0.187223085883438	2.76142153254195e-05	0.101031120887352	0.062008634868219	0.0712368568865903	2.39421123564877e-05
1	29	0.148126454723035	0.0975254461523159	0.223019947583921	0.161418298077834	0.208349162340464	0.244954040723207	0.148126454723035	0.136971854117821	2.24741053169058e-05	0.102636094213072	0.164184569340849	0.0622576997038496	4.05509228570472e-05
1	30	0.134682962399435	0.114319925119416	0.22422082461098	0.244854776905667	0.223574027901114	0.13328880957199	0.134682962399435	0.136351097317384	3.38639447931294e-05	0.0896521052578958	0.0581547464020047	0.0331709746836007	2.9960577846173e-05
1	31	0.149961292651303	0.105882289384757	0.221675960503412	0.196240422877207	0.170014140190932	0.261759178178383	0.149961292651303	0.0703901901003646	3.53194982264388e-05	0.0343482089480784	0.124782450871188	0.142627009670212	0.0534810039254384
1	32	0.117257305675078	0.115458978740401	0.214743752780959	0.222147398214192	0.210428230547221	0.168659191779942	0.117257305675078	0.160553617937189	2.94343374271418e-05	0.115748491664044	1.07665689455267e-05	0.0523588689546658	2.08679576125998e-05
1	33	0.117012118732421	0.0915049186593394	0.208182798309214	0.217506053658946	0.251520618888302	0.228480713329229	0.117012118732421	0.108395839752773	3.22467690381391e-05	0	0.0775369146036341	0.056805303131393	0.0155796619353396
1	34	0.119807396672189	0.0982729930351792	0.191179056743109	0.216960494267323	0.227887510202548	0.149471184947973	0.119807396672189	0.145259287001949	6.6924802138258e-05	0.0702191902501161	1.45731806887491e-05	0.0654370651456699	3.15984094415414e-05
1	35	0.13213878025494	0.117450227770016	0.200700239067258	0.217106000587337	0.175260554936661	0.210264193991163	0.13213878025494	0.0612991156134923	0.046944311900082	0.0628051785154306	0.20654332194693	0.0717404615034872	0.0493337193246039
1	36	0.140653153269273	0.0926024494387081	0.211776648366122	0.182392799764075	0.213346695827688	0.194251455631249	0.140653153269273	0.20359520971387	0	0.0731201168882467	0.103269400761068	0.0723301582976399	2.77912881778995e-05
1	37	0.140814054629485	0.0967949530639334	0.192624509630813	0.200882402693457	0.198804493878566	0.20182650704871	0.140814054629485	0.161259360305329	0.000596099067807568	0.0985187798929062	0.0462090623598031	0.0935473200229615	4.17842019591983e-05
1	38	0.158051510508781	0.101555006463993	0.184069510504053	0.223413237178474	0.207962382258531	0.176505764417428	0.158051510508781	0.0496766577739709	0.0747157026967924	0.0539986700776573	0.121619659340777	0.0532454199159558	3.94652572418377e-05
1	39	0.166937948522233	0.0992170745976859	0.183156175706391	0.197797560583492	0.214978966796689	0.233881780747335	0.166937948522233	0.136329614965301	0	0.135075583269007	0.126919604564839	0.0460057846495643	0.0917882688677901
1	40	0.14739881481979	0.0838230766788332	0.200668362398378	0.239601875087544	0.225732326106614	0.172478490893866	0.14739881481979	0.185591305258911	0.0138186211583497	0.0408539422843132	0.0966765537917193	0.0682195898549183	0.040095471373589
1	41	0.157653938584078	0.0985046349918398	0.210012208039889	0.230199305878402	0.201926393040098	0.175053312474373	0.157653938584078	0.10849725871169	0.0461555528141357	0.111038287985585	0.096837779938733	0.0486133000814769	1.25022191407597e-05
1	42	0.15214225933299	0.0962938740539108	0.167290259908875	0.213508813776612	0.195984225846869	0.214475377940657	0.15214225933299	0.180599964904641	3.42998903300223e-05	0.0897115465884241	0.0914203571068249	0.0565582273599932	0.0529223596113726
1	43	0.152155020278233	0.110990001518637	0.205883713566907	0.21146892192697	0.248298200817706	0.175749387406712	0.152155020278233	0.107745455049392	0.11859502461081	0.104104781757943	0.0958628017129594	2.44632478250811e-05	0.094766984977324
1	44	0.154921107630219	0.0930125086730208	0.207827575313231	0.233825014790271	0.256400038684912	0.207145712628395	0.154921107630219	0.203592288381268	0.000974624919186136	0.0526696337461599	0.113260416776246	0.0329854797037029	0.0374415244909189
1	45	0.161281205304901	0.0978319059478162	0.186951025735911	0.242112728160742	0.195926972218683	0.195868739616739	0.161281205304901	0.181718347638117	2.47487714764608e-05	0.0837076418428647	0.119645613028178	0.0372550661151309	0.127685652769116
1	46	0.169272236297622	0.102340321383604	0.178760459331673	0.201186122856547	0.199043695005135	0.223268446613305	0.169272236297622	0.146428925090422	0.0553239283795179	0.196593861894237	0.0868870754707386	0.0343730551801	0.0894994605535778
1	47	0.155128837753711	0.0901261001410354	0.188139121987182	0.211421240608064	0.226431445504499	0.180023404004086	0.155128837753711	0.150353481765923	0	0.0857374290534998	0.107191462232093	0.0262288109518533	0.0421544641322451
1	48	0.148571361397506	0.109490393456901	0.170542079167762	0.240850355098359	0.155411191208339	0.168020672600805	0.148571361397506	0.18670869232358	0.000469781816471884	0.0856186575135886	0.0701126948721122	0.0441567644364679	1.92838368725747e-05
2	1	0.141127771203254	0.134414060853027	0.196639386130545	0.295970460405606	0.275336590505278	0.334089894976366	0.141127771203254	0.155453020267891	0.220462619132474	0.241981704060079	0.282387657609632	0.245425402586246	0.183973367014914
2	2	0.126292515018449	0.115159527728546	0.216288824401556	0.213121604680318	0.26825197876009	0.23403411094304	0.126292515018449	0.191435882916181	0.236091477671912	0.255741042472378	0.256999813843921	0.252065456235839	0.211177059736449
2	3	0.116722416529562	0.136633026861966	0.210506389707191	0.235998130488223	0.289286965254939	0.212545048127367	0.116722416529562	0.226701967480432	0.228663384016379	0.270496343593053	0.233665701245752	0.261031235619777	0.215618836382516
2	4	0.117692706870368	0.122780886576541	0.230221795319596	0.247703924545771	0.2963345548939	0.251035201881758	0.117692706870368	0.203785069764452	0.236679179537073	0.271735641344946	0.27618412011009	0.24015900681381	0.210413280520362
2	5	0.139929803921595	0.152711552133881	0.26546441917062	0.248084152705547	0.233890520498815	0.222025317645731	0.139929803921595	0.20964329106494	0.271810862470297	0.322935813899586	0.259481544960115	0.194834888261321	0.197105420219759
2	6	0.1325753520647	0.145423466917398	0.212645207760645	0.274698024888686	0.230311750997719	0.235946928162683	0.1325753520647	0.176785125258241	0.221818658138349	0.273627712154524	0.257858074386416	0.241471337906865	0.19628827949149
2	7	0.123837125018121	0.11965597624435	0.201234005756466	0.276320477892032	0.28433744317828	0.211525883299221	0.123837125018121	0.201187225660646	0.256343652531515	0.247992603580962	0.246194941861385	0.223530705947919	0.179402883386812
2	8	0.114183520842817	0.130369313047297	0.192431027785217	0.240560616718917	0.258759444205731	0.259846027181793	0.114183520842817	0.207065711018825	0.249507087654321	0.278037361783129	0.228028237374482	0.272196230204032	0.212815199185529
2	9	0.12512613614361	0.101371400807778	0.21331680558363	0.259430889915509	0.233536021938061	0.256799156265402	0.12512613614361	0.210797283942748	0.223779901358258	0.24834508211149	0.277603129311965	0.237725877772084	0.17969912064364
2	10	0.126867035689497	0.12628362554486	0.241898416804718	0.252234225103937	0.258593320150851	0.23279481488582	0.126867035689497	0.200114517963998	0.216945096119574	0.25939079517757	0.247085417400661	0.229785147633215	0.187503040493767
2	11	0.131546736610027	0.137401308925778	0.210983406629957	0.238847887032002	0.221895844713378	0.269723516503808	0.131546736610027	0.211285012808543	0.261584989111541	0.26537673740776	0.258379498572366	0.228745939464427	0.207895570437423
2	12	0.118556728399956	0.128127112516681	0.224245525627625	0.249847574703158	0.268274348608439	0.294995461965697	0.118556728399956	0.178940554093189	0.260724420541354	0.278529548384121	0.25827694927294	0.255412392561026	0.199455772218727
2	13	0.122358125277294	0.141275591290089	0.200151328980601	0.23871523229747	0.231310570514352	0.236708263365193	0.122358125277294	0.17234392954977	0.215639139270264	0.279402087719098	0.2439578536024	0.219385327323259	0.17656760675125
2	14	0.136825012223475	0.11074154159247	0.202816200944066	0.266810312583881	0.274532806377216	0.216814345105616	0.136825012223475	0.229279327756619	0.22386228507423	0.291489748368952	0.256570883721597	0.232466473982724	0.204048962072106
2	15	0.128550070885424	0.120298587601385	0.227660570225435	0.244474009180462	0.2533369859908	0.254626824986952	0.128550070885424	0.221677233919467	0.237529817382292	0.27298170867095	0.255207491265973	0.219354346209307	0.226092337017111
2	16	0.122054769080487	0.143959154603724	0.217353983322029	0.193555582221031	0.23517189166519	0.225160743347198	0.122054769080487	0.170204266927056	0.256112044144747	0.219135290862979	0.275247561890422	0.24750857687867	0.206463034378837
2	17	0.120632805404356	0.129477332505299	0.217728045093588	0.262638919852147	0.227524384412377	0.2821209581165	0.120632805404356	0.175082639428849	0.218368038701605	0.276777115719448	0.268229901101212	0.229712130461801	0.219975204005833
2	18	0.147112131859793	0.115156499817167	0.192438381211243	0.223942506664676	0.231516404669666	0.251816368605702	0.147112131859793	0.21280930880462	0.21794655724511	0.245678366464181	0.235809744322862	0.255073757564067	0.169819639605804
2	19	0.143253064924085	0.126816935825648	0.177105504927446	0.239994628989732	0.277908986812582	0.210652736585599	0.143253064924085	0.214849205052534	0.222409051845517	0.287868575040798	0.252347791385714	0.225445523806693	0.207307879187219
2	20	0.150062513947181	0.104105725497189	0.215225641117655	0.220349074135624	0.25633958842369	0.239457595234365	0.150062513947181	0.215401267356103	0.249784156916906	0.288811955013469	0.234902469466397	0.237537465535771	0.210178074583485
2	21	0.140380659215891	0.108440687445492	0.171847511584569	0.228409162704546	0.231712520410798	0.245298735530687	0.140380659215891	0.197661646534574	0.22360574085242	0.28032761143929	0.281751205436521	0.23906199444256	0.223177691071989
2	22	0.138523851516979	0.0925892925892904	0.211438149538056	0.289455642396816	0.27598419702708	0.209469409400907	0.138523851516979	0.189659800410566	0.226736251831603	0.286447340664036	0.246015858667844	0.23622297522476	0.207191149203514
2	23	0.126546798628761	0.102643241185916	0.156525029409965	0.233199691210747	0.263496535151524	0.228892686068048	0.126546798628761	0.206819701466665	0.222408345906597	0.271112351717539	0.234806142473254	0.23142597484578	0.208208798993258
2	24	0.149239273197591	0.122734714121389	0.200847691049088	0.277202723146748	0.273303284528711	0.236857548274116	0.149239273197591	0.258185815110493	0.266010926181959	0.296657704843019	0.26548480280867	0.246615293646405	0.19822004062983
2	25	0.140632472310082	0.126720216969563	0.198226809071596	0.225516781894067	0.236541769621449	0.236518621583207	0.140632472310082	0.222384372115796	0.27900754629627	0.268360820037503	0.263932089371814	0.245416057954207	0.195607469674348
2	26	0.144012997181797	0.0982547153989729	0.224880932537343	0.247954704671009	0.250445233576387	0.26427853020485	0.144012997181797	0.229670385783951	0.255741360958645	0.254523597271071	0.256690609673917	0.199578682090268	0.207035047328151
2	27	0.163084734685665	0.11301049234953	0.223429020313179	0.259468000385798	0.261778876187003	0.23133301726215	0.163084734685665	0.197837124772145	0.26067457224702	0.269486166582056	0.243027202546838	0.247018735008447	0.231615942213738
2	28	0.144381188745551	0.093827689977806	0.202839647131674	0.223427300116145	0.252238250129882	0.272469059582449	0.144381188745551	0.223504978241819	0.260302204946603	0.292102238384405	0.283100221615273	0.243413043322513	0.214287224260981
2	29	0.149120088298488	0.121312383759615	0.214304747009104	0.222347444334835	0.262776646373006	0.228622557007865	0.149120088298488	0.185536776098895	0.246747046939679	0.26479654683913	0.238281582414795	0.247688896317044	0.219597051118473
2	30	0.131128927239278	0.110509299230161	0.185533811195426	0.284496921149045	0.238194807662183	0.232874298988832	0.131128927239278	0.194542235277328	0.279124349911739	0.276521339122429	0.282859129851229	0.244017038728774	0.214901317473228
2	31	0.15311975192221	0.102290892065327	0.168908551109547	0.22213209358248	0.246368940601233	0.251691493851315	0.15311975192221	0.234008499790742	0.254644731751186	0.273149967797527	0.229065588811796	0.225795753276671	0.239247798513556
2	32	0.140905170979867	0.102154197175089	0.186338037217073	0.268709687374622	0.266701731782234	0.259387600216135	0.140905170979867	0.259613998059834	0.245170181383585	0.290428530158093	0.249478239080952	0.248889759037036	0.258904145848931
2	33	0.153522558141062	0.122773198184004	0.207847797574802	0.250721492081555	0.270180489596166	0.232501698714744	0.153522558141062	0.208062746634283	0.256838239772118	0.288954315658557	0.256117895632158	0.220438551663673	0.229708259995951
2	34	0.166296319511106	0.131224193454992	0.183099326934601	0.238264011061504	0.231028250120705	0.276831031097584	0.166296319511106	0.189225786497559	0.265072690285659	0.287898442863265	0.241792587462698	0.22185366001626	0.228197793563754
2	35	0.154559521541838	0.107875054194556	0.202851094290193	0.235465895402161	0.246358859646769	0.254923221091015	0.154559521541838	0.201479641697852	0.27533010969299	0.280547924537847	0.27147522666749	0.20486524792911	0.256388127318284
2	36	0.150958314844171	0.0918870815602724	0.164110549799633	0.206034599029463	0.234438467958827	0.283938672927523	0.150958314844171	0.217924343195678	0.268574820669394	0.262351531482971	0.225459646636	0.251241689348757	0.243131315293251
2	37	0.159270172198693	0.112106171088698	0.187621803080407	0.286838668522198	0.231807923825076	0.243866052237886	0.159270172198693	0.211620259020045	0.254335579460748	0.251143318590573	0.256829657262977	0.221078929142914	0.254234898403115
2	38	0.147174788119087	0.100410077446839	0.154296011006363	0.237984849732911	0.263479279268004	0.254970050391881	0.147174788119087	0.229119450261817	0.258621837653183	0.263843555893359	0.255211941140774	0.257579691547026	0.269743062770941
2	39	0.178185438382438	0.10831485824758	0.174041027791645	0.246128518543971	0.2237129314302	0.257009078831592	0.178185438382438	0.210838517020738	0.28362294087139	0.230070278699205	0.237205851449023	0.209084330534893	0.258150695326469
2	40	0.149313866066213	0.116396944082877	0.176085173816202	0.218270459261546	0.236926477664128	0.286961646936697	0.149313866066213	0.220754519605775	0.2704723863383	0.272349891005132	0.25104577163956	0.215921080529193	0.279453331157155
2	41	0.145040129380454	0.123090039251547	0.164101164927828	0.236254085283687	0.249262194333527	0.223330547706893	0.145040129380454	0.216279639374854	0.294307705509487	0.255458732295133	0.251839951774594	0.246648834226681	0.280343185986495
2	42	0.176591281382674	0.106809821961366	0.188048131966796	0.213558437915245	0.236422206074164	0.231964763859186	0.176591281382674	0.195335454981852	0.244982168726735	0.270600578346102	0.254668849944779	0.237206086085314	0.263701232210698
2	43	0.15070355432524	0.143310255870573	0.193629300870854	0.20978043561621	0.247509993851558	0.242630382000772	0.15070355432524	0.21886295270775	0.250174717536266	0.242291731712336	0.24896764739792	0.225205204645242	0.297550992992363
2	44	0.168191479881663	0.125490380495552	0.178554379394841	0.224458882202756	0.2229301660195	0.272895732118762	0.168191479881663	0.220183910063983	0.239715262225447	0.280497283872936	0.28841594813688	0.218998200111578	0.271051197064169
2	45	0.188247277836321	0.124994641356723	0.209794069287463	0.208595169356353	0.246587651959651	0.227053373753567	0.188247277836321	0.193383329359405	0.256971044154161	0.258057066838073	0.219511239573213	0.228484905680715	0.27571140765686
2	46	0.152852731514899	0.0994703646758779	0.179907186890385	0.220186152044969	0.279086576505582	0.270522234438634	0.152852731514899	0.213701402477466	0.257021852635774	0.257394392835966	0.233126207401742	0.21273763353439	0.311722100050754
2	47	0.150761643455006	0.11118858327606	0.161083671153504	0.259273785535783	0.241493966246018	0.234690226728069	0.150761643455006	0.239378145448757	0.306469097690797	0.26705556569346	0.234175226768971	0.214313465382614	0.267592542418656
2	48	0.160856903353467	0.133029616063481	0.188083343555202	0.218144381026324	0.270860923219455	0.239562917227711	0.160856903353467	0.198621810500493	0.268177749463013	0.246079622747371	0.213483295286752	0.238018957060771	0.293493147582588
3	1	0.122070630382313	0.140954803862535	0.166166705479253	0.118843998742472	0.116179368596014	0	0.102076884996698	0.103494326096383	0.0963997828607137	0.0559248675246803	2.065238898139e-05	0	0
3	2	0.120338629450281	0.137980419647063	0.169018757585558	0.112428633631192	0.114275861016592	0	0.116854828466754	0.124486303584063	0.0964027830251294	0.0521013053475307	0.000203767290301773	0	0
3	3	0.109030836835964	0.146192642792364	0.144839988341622	0.118478494575838	0.117755431906895	0	0.102246207802264	0.128305315681413	0.096824007500092	0.052237183055778	2.10103568424926e-05	0	0
3	4	0.106241072995996	0.149526458745368	0.151075929828225	0.114847400309827	0.114260560115815	0	0.130442361201972	0.129486994893983	0.0992955479110101	0.070434308863264	0.000118168716702539	0	0
3	5	0.135245449788378	0.131463001077295	0.135845593251939	0.121096249967284	0.112760000400012	2.0807925989395e-06	0.125533671882145	0.126378222635045	0.077553361320452	0.0602186026463503	1.71228469155386e-05	0	2.0807925989395e-06
3	6	0.109300791136058	0.137664531035624	0.151239246836684	0.134023914420842	0.11482627271032	0	0.121525387670091	0.131018038320629	0.103578984334737	0.0789658122534067	2.13729559431168e-05	0	0
3	7	0.112499604764378	0.149701559840253	0.14317902476137	0.137754065249781	0.117625107208784	0	0.11901760227401	0.104112073021069	0.102724088464217	0.0753188217222223	0.0301691384843694	0	0
3	8	0.123586130461712	0.16928058334683	0.161004864061794	0.11964463227699	0.131828791873277	0	0.124311972541333	0.125148767796637	0.100772015361842	0.0768383820149019	0.0087694882622696	0	0
3	9	0.142258882686699	0.137615501138567	0.161845505281735	0.121908780411911	0.108651718246347	0	0.121755295046557	0.12676269809098	0.107340414915918	0.0757859210896279	0.0467366004634944	0	0
3	10	0.120059161735909	0.157291092915284	0.123623710937974	0.118467870408866	0.127082851359744	0	0.12180245932095	0.117301628072977	0.0730430134095947	0.0650292392204354	9.66687933833301e-06	0	0
3	11	0.134037491965773	0.165302599150262	0.146629137104867	0.122675904181129	0.124493844092162	0	0.124112092702748	0.132328239881801	0.0940226290795981	0.0785212193027047	0.0224337171563551	0	0
3	12	0.150566775207427	0.148857348634902	0.141169866802342	0.121269108500584	0.151630124837659	0	0.107441634034288	0.109243970844923	0.0808807880803084	0.0745357135059656	1.01651945774095e-05	0	0
3	13	0.120547516156001	0.149173571688916	0.144809918490787	0.135100671391229	0.0869624299197236	0	0.125179560869984	0.119496448779846	0.102815362920164	0.056690854454432	9.75526955028185e-06	0	0
3	14	0.118120769733455	0.151938611943824	0.146483853405464	0.117841007249587	0.114027640177837	0	0.106915221246931	0.116290983486141	0.0760484760046791	0.0769371707919907	2.02451721454804e-05	0	0
3	15	0.112814450701198	0.143924726378426	0.146473203971548	0.118775929487043	0.126242084946547	0	0.124021681926107	0.104858442231525	0.0837241966407346	0.0591163299905292	1.9782963741985e-05	0	0
3	16	0.119407313858512	0.144105440191452	0.140470930059086	0.112555668625179	0.120582210270942	0	0.134540454220369	0.121892081393899	0.0759271656125174	0.0595870644745917	1.35367454960973e-05	0	0
3	17	0.0625903626104215	0.144500568365457	0.141999963078593	0.132431008398571	0.141881304223981	0	0.132896562438478	0.119268821584021	0.0979800985579645	0.0749956302498213	1.76090630674172e-05	0	0
3	18	0.0933234906373253	0.154315823747255	0.130390955052297	0.105302262208478	0.140280834192295	0	0.13133608023295	0.131704996286982	0.108381361770768	0.0550454618664977	1.37529637641476e-05	0	0
3	19	0.102303429930585	0.126736328719866	0.170011606132476	0.128129767236517	0.0982589933134823	0	0.10176166462273	0.105824818292074	0.129463558519266	0.0607138109012217	1.88931986380497e-05	0	0
3	20	0.0835443227390473	0.145909178218759	0.136309906923959	0.146170299480259	0.126255760561383	0	0.131037970648845	0.132860006950136	0.0782469451476637	0.058379327846443	1.30151933831048e-05	0	0
3	21	0.109187411469278	0.160098234749661	0.113842867813496	0.10051166880524	0.132299403545597	0	0.114766654454819	0.0975294862569926	0.123379932051081	0.0609097525148894	1.33740081505646e-05	0	0
3	22	0.0546949314149042	0.134823593519556	0.146617684461263	0.1269345936108	0.111896984227453	0	0.111128989393194	0.148373079306756	0.0850363573346675	0.0529722141610906	0.0236731722690012	0	0
3	23	0.0726347542215155	0.139695919416035	0.149611122809576	0.12871158762458	0.143547304155645	5.56401254411625e-07	0.107138557817252	0.118362568869646	0.0973594839415151	0.081775605658621	8.83813428223237e-05	0	5.56401254411625e-07
3	24	0.0640110430572635	0.147585923960756	0.118311948058655	0.132844394786062	0.122641542024234	1.12368893629068e-05	0.128393776171799	0.135187908982942	0.130511910859292	0.0555766559254704	1.54931628677411e-05	0	1.12368893629068e-05
3	25	0.0650022659779184	0.151444018340321	0.162268413359334	0.10527742543361	0.124088592961445	0	0.0969566779614057	0.118297090037975	0.0848393761407262	0.0761548049323493	1.36481134217348e-05	0	0
3	26	0.0661183707100943	0.132819421082311	0.134216529437622	0.111054800875152	0.120847725939938	0	0.120012582535975	0.122830200811775	0.0782906613388383	0.0736194224477204	1.53631677702562e-05	0	0
3	27	0.0711242940369384	0.148382937568401	0.112525663245638	0.139992164099962	0.11869307998277	3.651671444212e-06	0.101462088087834	0.120592062358577	0.0792815821583503	0.0719226989677478	1.52038070294646e-05	0	3.651671444212e-06
3	28	0.0520956360097273	0.147953818758055	0.172141490736018	0.116919493993913	0.113811345550502	1.65009709780316e-05	0.0846744974982468	0.103680092485022	0.0952502287530556	0.0552342761600842	0.0302149853080143	0	1.65009709780316e-05
3	29	0.061377837509475	0.137098264605107	0.148765502638528	0.130842110714834	0.122607294147895	1.52697012952641e-05	0.122679968337578	0.0966684716549856	0.107456694753828	0.0655921521032432	0.00016909440020426	0	1.52697012952641e-05
3	30	0.0410636331674612	0.148842726770009	0.144803697395141	0.134627887622764	0.100104862853797	0.0476908285955119	0.128634330783537	0.10149082644796	0.0876414397846561	0.0577485699584672	1.50185105374745e-05	0	0.0476908285955119
3	31	0.0635292970230866	0.143414272793408	0.157591690649108	0.133011532808671	0.119595845151074	0.0456150828157058	0.102502496822128	0.12044517807133	0.0818465623041892	0.0643434060003239	1.78169736566551e-05	0	0.0456150828157058
3	32	0.0510593265113531	0.143735991679035	0.127226011313542	0.135965098456162	0.122104065888455	0.0528407809090216	0.0975205162308746	0.102497072006458	0.0560001325318014	0.0568286286913494	0.000166384860087721	0	0.0528407809090216
3	33	0.0612655538046577	0.155135988350773	0.14150407071147	0.129244773612348	0.108147099353242	0.000172850411876307	0.122289263695707	0.103402567579823	0.0835111675838108	0.061045117116289	1.31969124470504e-05	0	0.000172850411876307
3	34	0.0716107137107526	0.152558611383092	0.157581953190826	0.1306701216526	0.119240874182223	0.0661636113473205	0.128770408315927	0.104018287659174	0.0597203633078005	0.0621658900860571	0.000107433839549314	0	0.0661636113473205
3	35	0.0486694896374758	0.149704306588003	0.144850732223	0.146458504015279	0.11944083543327	0.0784051250868153	0.111824601853359	0.102152881864111	0.0818191753963568	0.0332085750838917	1.43255598034673e-05	0	0.0784051250868153
3	36	0.0213674652656103	0.142344596966653	0.159895982664001	0.127539218199363	0.0884568496820822	0.0148754486012457	0.0931295488471369	0.107018009652316	0.0573151376622474	0.0238530259679723	1.42269172070846e-05	0	0.0148754486012457
3	37	0.0287725358529528	0.165680066983687	0.140392244179453	0.128251729454407	0.113068041842585	0.0455499946051428	0.131970582993266	0.104215013548368	0.0558077186631604	0.0736760366322076	2.09422626963392e-05	0	0.0455499946051428
3	38	0.0396048496957929	0.135691133385572	0.144896614172078	0.167608590800659	0.136131809009196	0.0481963954780566	0.119407951975224	0.105723256906996	0.0575144112273551	0.0353690555160787	2.02597297301197e-05	0	0.0481963954780566
3	39	0.0426218735819324	0.140674224413722	0.166485936331897	0.130139669936991	0.116873387277732	0.0713374766792483	0.120763371478087	0.0977647655399036	0.0585752228187387	0.0407489141458925	1.50738392061124e-05	0	0.0713374766792483
3	40	0.055946973420013	0.133860162163628	0.151290385937827	0.136860272855005	0.130347348649993	0.0855393768892897	0.11718704182448	0.105455291044007	0.0595855676604989	0.0396266779535387	5.55610499121013e-06	0	0.0855393768892897
3	41	0.0296721535970382	0.140661789639993	0.172976894554812	0.128423238406182	0.133958734533182	0.0962309690654584	0.122503919766983	0.107200616965114	0.0569328715235588	0.0126579026856957	1.58658384749346e-05	0	0.0962309690654584
3	42	0.0179869135005959	0.154872506055594	0.156276332176803	0.139265528000824	0.11105908311062	0.0741656250309098	0.117799568036468	0.107433610169292	0.060457065216293	0.0392340494206886	8.53436018540877e-06	0	0.0741656250309098
3	43	0.0659879779647899	0.147678340320746	0.144355809404214	0.133451782260907	0.117253485586492	0.0819061969981739	0.114175584845959	0.106531369190547	0.0616761159459497	0.0619190957274846	1.11479488860856e-05	0	0.0819061969981739
3	44	0.0221859138072139	0.134519999749248	0.158904219150855	0.145739775242895	0.133991279107151	0.0799365215654011	0.118430240443645	0.10614145261384	0.0601610270498245	0.0643685198564302	1.49352036238392e-05	0	0.0799365215654011
3	45	0.0946776845312205	0.15590162033618	0.141559169739231	0.141142448517173	0.128958332053436	0.0852767604784836	0.117730341690681	0.112244487668253	0.0599370329599857	0.0393050329241988	9.48351811730331e-06	0	0.0852767604784836
3	46	0.0990337809452946	0.13972423509726	0.16807679536713	0.133062240214964	0.13925744448274	0.0785565178770381	0.124274171455952	0.10446617055605	0.0595713396868244	0.0620486389215319	1.46140288794983e-05	0	0.0785565178770381
3	47	0.122515137572729	0.128849781037606	0.160416859329501	0.14042097054545	0.1322856098813	0.0707368288024763	0.120980393207503	0.107376171837451	0.0575109219519526	0.0388123882729054	8.5287919200697e-06	0	0.0707368288024763
3	48	0.0545856101090502	0.132025765167846	0.126675204889317	0.132633433581656	0.112302929586166	0.0688245027915004	0.121983981502968	0.106323829370964	0.0600728571194874	0.0380036303561283	9.49540469651243e-06	0	0.0688245027915004
4	1	0.0939765342304946	0.097626257619599	0.112459546142027	0.132836180205619	0.129984400516867	0	0.11114862913824	0.0875713698635084	0.074602803318807	0.0432737479476497	0	0	0
4	2	0.0997069285384947	0.118478777254172	0.126706066788993	0.0805953587607902	0.103889348936216	0	0.0953603572468733	0.147329361313205	0.0416639886142659	0.0271533145611944	0	0	0
4	3	0.0977585934120089	0.108722121728868	0.113980227543581	0.0477379710524397	0.0660136248633093	0.0095564026009275	0.0920216585910879	0.104605430033938	0.0806613111778955	0.0407835446777727	0	0	0.0095564026009275
4	4	0.0915874242244154	0.11620919002082	0.114201070836478	0.0800462077235844	0.0673959308631512	0.0626475801928678	0.0930371503204056	0.0753652365284575	0.07427515970223	0.0269835230387255	0	0	0.0626475801928678
4	5	0.0880444733130774	0.127307589821919	0.110926779070959	0.105102127804575	0.0782325957016291	0.0608782874187218	0.0986777210108652	0.082048500201235	0.072681039304812	0.0264030444361779	0	0	0.0608782874187218
4	6	0.0955455773398261	0.132466961735254	0.0983934868611959	0.117716384132439	0.0914562613945846	0.0567005226309031	0.091014757070369	0.0893841343808221	0.0555973080028647	0.0184636410148994	0	0	0.0567005226309031
4	7	0.0837137877972086	0.100614396465473	0.10752518585002	0.0624545101276245	0.0884923608005751	0.0736235477161688	0.100804404507725	0.0837287729221746	0.0686692562514645	0.0507583101351622	0	0	0.0736235477161688
4	8	0.0973610328806323	0.104681840368956	0.106339600688037	0.0787900574391955	0.0858324989363452	0.0884429709337049	0.0976762064049282	0.131253301168049	0.0684663178402922	0	0	0	0.0884429709337049
4	9	0.106922822194595	0.0966719676888979	0.111589469412658	0.100268042677676	0.0753049408593268	0.0870917948965294	0.0917234823038586	0.0828809425493291	0.0823573058870398	0.0247942488115486	0	0	0.0870917948965294
4	10	0.101165046435931	0.108110980015684	0.112555132524382	0.0797097802800479	0.0651576338576491	0.0656104714167122	0.0952240426858435	0.103747237136274	0.0657787191307575	0.0181423046790346	0	0	0.0656104714167122
4	11	0.102062342409915	0.106433560240583	0.11564199454867	0.0542294025914697	0.07560834047996	0.0853931826552457	0.0960235625645389	0.112025482477407	0.0842911349145879	0.0348718652388604	0	0	0.0853931826552457
4	12	0.0967982826085597	0.100696669966235	0.117668488376381	0.0977146669327478	0.0672621559003868	0.0655959680544297	0.0976744519066615	0.114019087731602	0.0552368813993925	0.0337846623700945	0	0	0.0655959680544297
4	13	0.127313477050061	0.105857650727615	0.107520747052362	0.0908645675707508	0.0887599912884187	0.0871394394519822	0.0982261384442851	0.0819785877764273	0.0797705845680905	0	0	0	0.0871394394519822
4	14	0.0917150785337291	0.096792164424579	0.116134199531112	0.0912759300811733	0.060476812049697	0.072237645345283	0.100762175055741	0.105757621087246	0.0655606679034077	0.0296692712670813	0	0	0.072237645345283
4	15	0.0727134425229622	0.0985195189927933	0.101623665689903	0.0748799861681249	0.0890918209098424	0.092180614652919	0.111033440368018	0.0877933459730126	0.0450987368316373	0.0158972604180021	0	0	0.092180614652919
4	16	0.0764781308979091	0.0988726094453947	0.107167074624544	0.0820999520331375	0.0717972769486665	0.0969576127515384	0.103484586539664	0.10749266355519	0.0609471222466451	0.0297328874096148	0	0	0.0969576127515384
4	17	0.0859949162162837	0.105752037136349	0.112380679829997	0.0977657958607756	0.0975172081877893	0.0699952870872782	0.110645503866445	0.0966591519463474	0.0897350915491445	0.022413204999805	0	0	0.0699952870872782
4	18	0.0775978889688295	0.109369287638526	0.111538532629449	0.0686308744650734	0.0598801410161486	0.105614408991446	0.111167385796717	0.0960264299679619	0.0787717258125031	0	0	0	0.105614408991446
4	19	0.0527951534833271	0.110126367777778	0.105635234876912	0.0997546092845735	0.0921003301988054	0.114230879819091	0.105482970408091	0.092033927193093	0.0538074001383781	0.02923875044973	0	0	0.114230879819091
4	20	0.0721730602306426	0.118656871218377	0.107566122778842	0.091160944180608	0.0924929540470453	0.0905215379303898	0.108199443690307	0.0762360373379796	0.0905005353009274	0.0482763041697846	0	0	0.0905215379303898
4	21	0.0818980848604202	0.0832636367174856	0.1269907998296	0.0970343371088405	0.0278283917484841	0.104148937475378	0.113723173736801	0.0592928728519745	0.0560946161998436	0	0	0	0.104148937475378
4	22	0.0562562096561286	0.0803851001910774	0.10785759408904	0.109467281865391	0.0908010899626454	0.114457055789	0.115146613258176	0.103420889003885	0.0661743793116447	0.0341273805581784	0	0	0.114457055789
4	23	0	0.0848465224855662	0.104852342283707	0.074698957067437	0.105360019772718	0.0971045730516304	0.115219505894648	0.0855568870973421	0.0850583869245748	0.028110351814257	0	0	0.0971045730516304
4	24	0.0609966160701152	0.0782795173895876	0.12083057860817	0.0650065678185974	0.0538505014320127	0.103406724549268	0.11157917383677	0.0640002404506158	0.0526237092620221	0	0	0	0.103406724549268
4	25	0.0686884878017491	0.087683644178924	0.103584389032849	0.128809637628611	0.0668521892217031	0.114896683318024	0.12012981554306	0.089890156872831	0.0451938705258814	0.0157240511650432	0	0	0.114896683318024
4	26	0.0471154557190623	0.0840117736567823	0.101433997223438	0.0728068686632278	0.0645004958240804	0.100179262170641	0.0892409896514324	0.0848930118230562	0.0685224178947743	0.0254958336824284	0	0	0.100179262170641
4	27	0.0518435806445934	0.0886662087357099	0.0956542506040549	0.137117856893097	0.0733049217313288	0.141328874098491	0.114785610306628	0.0936977612077087	0.0702293128707458	0	0	0	0.141328874098491
4	28	0.0437700008691746	0.0894842000977252	0.129739472234465	0.0779921375622681	0.0265770674921194	0.077494606759497	0.111014416277539	0.0750219658914636	0.0853129115596567	0.00933914990976976	0	0	0.077494606759497
4	29	0	0.107201430181491	0.107124104322095	0.0600151757980557	0.0985659207933382	0.0938994952086092	0.0909635087730239	0.0869200597479247	0.0534617310724849	0.0231335795839891	0	0	0.0938994952086092
4	30	0.0453316868923918	0.077960203466004	0.127530493665523	0.109972465923256	0.0786815129080204	0.133518910401031	0.113797851049829	0.0945381334495028	0.0809262014805361	0.0190854654592794	0	0	0.133518910401031
4	31	0.0630843441315883	0.0720508318702478	0.103081327820942	0.109905665704514	0.043716398128249	0.133734050835291	0.090158709151799	0.121937116246605	0.0522033639894248	0	0	0	0.133734050835291
4	32	0	0.0929338258635817	0.109550297222746	0.112118296554884	0.0960425100140707	0.124786319533272	0.122562722380677	0.0933021226195187	0.0468116063164886	0.0200398932901116	0	0	0.124786319533272
4	33	0.0364932772040252	0.0776535125322527	0.0942716347485185	0.0849166429368336	0.0630692560127424	0.120558124290032	0.0711821993612544	0.110866437594876	0.0628222554047058	0.0154801196016984	0	0	0.120558124290032
4	34	0.0481861221798965	0.0703684139659627	0.0965201422222958	0.100992006875154	0.122278836016655	0.0902819955504146	0.0847726311985101	0.0891519315353453	0.053026818197487	0.0161496187446649	0	0	0.0902819955504146
4	35	0	0.0961354057272101	0.104227770912805	0.0719019263335835	0.0808208967686038	0.106127400745423	0.0919988999459319	0.0927552310652032	0.0491526483089258	0	0	0	0.106127400745423
4	36	0.0429416281861603	0.0839423443841846	0.0938748504699382	0.0770454248263635	0.091552215940081	0.10900717583101	0.116969629271875	0.0865256898830912	0.0268973549717253	0.0179954725964068	0	0	0.10900717583101
4	37	0.0542784937209499	0.103089877848313	0.111973439298151	0.089805355505342	0.0767489796440851	0.0882109604400124	0.0953532117247125	0.0816197102506142	0.0299865079810318	0	0	0	0.0882109604400124
4	38	0	0.0728966331885032	0.112961248136026	0.0825739937432092	0.101900005262943	0.132352556628494	0.0994483489144654	0.0687470654614603	0.0549366021173226	0.0164321676720139	0	0	0.132352556628494
4	39	0.0384302784576651	0.0851804126449189	0.0888199494548326	0.117782325450896	0.0728313281112278	0.150555513474197	0.0857521279105676	0.0922895092642948	0.0613412277572699	0.0184947226961788	0	0	0.150555513474197
4	40	0.0575104675505941	0.100358602665204	0.116652968337583	0.073795555631093	0.105613182998823	0.117217476220979	0.129296636043245	0.0975525720041229	0.0285244560261854	0	0	0	0.117217476220979
4	41	0	0.0970626454544857	0.112527588775552	0.111807132214038	0.0859164459187645	0.103152204054676	0.0987300885529694	0.0558777202619141	0.0513717554842542	0	0	0	0.103152204054676
4	42	0.0332573366070382	0.0935858520981583	0.0960108072366576	0.113427849594517	0.0598371947301014	0.150547304819885	0.0631452645042639	0.0595133237989937	0.0552023321527554	0	0	0	0.150547304819885
4	43	0.0668368025350531	0.0635681934410131	0.0978584358908712	0.108375311493103	0.0780155302829377	0.130200595337494	0.0886628272108245	0.0647812580619026	0.0494746913337484	0	0	0	0.130200595337494
4	44	0	0.0809717939172806	0.107578965493427	0.104423723252139	0.0808355903797628	0.128407575356924	0.129188730658635	0.0964320680076483	0.0301873655113559	0	0	0	0.128407575356924
4	45	0.0603944403068068	0.0932428913828662	0.0749252112656983	0.114109898516196	0.0813045591204074	0.0962421267100799	0.078392353458903	0.0599314341829451	0.063512739288963	0	0	0	0.0962421267100799
4	46	0.0493796944085081	0.0631663950968733	0.111109760347278	0.0675276047546315	0.105850419626443	0.0942233859861283	0.118821293441416	0.062071989378482	0.031747306117976	0	0	0	0.0942233859861283
4	47	0.0447219067500992	0.0699785582806882	0.0939429783112593	0.0674873467867714	0.0879919616025607	0.109408733685546	0.110723782959546	0.0678678807603019	0.0310304003618217	0	0	0	0.109408733685546
4	48	0.04941313664709	0.087285727236538	0.113175240782611	0.108143338863743	0.111618733757152	0.121866440789582	0.0938059268868132	0.069263877475432	0.0358366226416476	0	0	0	0.121866440789582
5	1	0.182729330501949	0.232567277143532	0.221704910286823	0.174176242045122	0.21895722273095	0.233194799012266	0.0600897377273327	3.12159039524392e-05	0.0256690523895505	0.0748120417100254	0.0824023029745241	0.179811001670596	0.233194799012266
5	2	0.196266895560718	0.209283408086403	0.21919522880856	0.185863025326007	0.17614112290161	0.210885700394761	3.13276106305972e-05	0.123520347481696	0.0562682969792712	0.139729200556407	0.159809847586695	0.202840923779974	0.210885700394761
5	3	0.204707916428351	0.219136848142593	0.240995605267372	0.191605097656176	0.201393178546844	0.207595829724187	3.52764813916175e-05	3.0863191256182e-05	0.0367320725480031	0.0367473499964873	0.114484168706081	0.159950458826918	0.207595829724187
5	4	0.183382619815894	0.222348496462448	0.209998146088147	0.230613190314524	0.185139266642522	0.206947363971928	3.51932396354293e-05	0.0235807174682677	0.0564176165628403	0.125677247422607	0.160237836392047	0.176130226505718	0.206947363971928
5	5	0.184689472163324	0.234787807943728	0.234908959069709	0.192511423344675	0.173056317509681	0.21229620393575	2.80394956112176e-05	0.0539328069112925	0.0915315734459814	0.137615156021179	0.150046279227799	0.179981870792256	0.21229620393575
5	6	0.200326627498172	0.223792808163289	0.209229163823992	0.219893708334187	0.200125118016664	0.200867745149559	3.37334775126721e-05	0.0365827690648342	0.0365208732552372	0.112276657716034	0.162239324571201	0.159083095158608	0.200867745149559
5	7	0.207436594514608	0.232801216988753	0.218434629069814	0.168910685474951	0.162411360193174	0.232463681535808	3.17062588281222e-05	3.0326994717015e-05	0.0952061258810268	0.0527460281618118	0.15056053486358	0.189190228692808	0.232463681535808
5	8	0.181650858022031	0.216839080434844	0.22204368065236	0.187775384821702	0.20270790184202	0.201338048526649	3.02045227417769e-05	0.103081475137406	0.0327504860847837	0.169485397984175	0.154108768207429	0.154002006107046	0.201338048526649
5	9	0.193340165987648	0.23774187014277	0.262985936639088	0.188417198607973	0.174658066257269	0.221349787624137	2.41454839410573e-05	0.049414724388228	0.0838923298750646	0.0791458367131245	0.148233204887694	0.197986561612924	0.221349787624137
5	10	0.204488553887949	0.218835829978801	0.227339471368649	0.218663673243778	0.139361421431736	0.233508420552055	2.98445755688933e-05	0.105038681356841	0.0261123709149066	0.0991798788336438	0.139285747467261	0.173602802051691	0.233508420552055
5	11	0.200473267862001	0.227321547496626	0.248844753181306	0.223598842365597	0.211679599914677	0.230741296482922	3.35412613002144e-05	0.0202401439651204	0.0403044232775175	0.0853093025489968	0.133488869451966	0.179475414004024	0.230741296482922
5	12	0.181017890990929	0.221483686214682	0.236385379961431	0.186832893682392	0.160305782700381	0.239305479068041	2.7488678279657e-05	0.0420182144178103	0.0452561350656643	0.146222341622614	0.192972916530059	0.17540656090412	0.239305479068041
5	13	0.195944736238859	0.23567507812409	0.223342588734657	0.179081256516508	0.154047958851944	0.215745870803248	0.0337498602717313	0.0395988603242995	0.0483822133409671	0.109917485279445	0.13100949910437	0.184329730311017	0.215745870803248
5	14	0.190309984467902	0.218139335440751	0.251769605193855	0.227389905329094	0.168384850790741	0.196089315367818	3.20681893035991e-05	0.0343473410802689	0.00081402894474701	0.140584892867268	0.125853560492867	0.172926557033452	0.196089315367818
5	15	0.19137606174494	0.191245405717427	0.207588319301595	0.247958035657197	0.211921593700663	0.222591176712167	3.58475769626844e-05	0.0450834024612283	0.123652607296409	0.0533260925657479	0.162410197928594	0.188597939628055	0.222591176712167
5	16	0.192368556290444	0.207547724853328	0.237616606637799	0.206698253271232	0.146109586561994	0.221764802769564	3.23595546249101e-05	0.0577818020494976	0.0399060297948732	0.129100200951216	0.132690143843966	0.157904604324254	0.221764802769564
5	17	0.192005282496192	0.183696282897605	0.242275029911944	0.207016919754412	0.18177041287848	0.244286094403488	2.74699808951906e-05	3.10082157258351e-05	0.036209074344448	0.074958821645748	0.16423031876129	0.173114772903837	0.244286094403488
5	18	0.200487073623815	0.206931578947871	0.242771310799013	0.185739258153167	0.221089641095011	0.210841943382491	0.0407463516639871	0.0595450590710191	0.0514883385101732	0.154418900711232	0.161095759902614	0.198467955601609	0.210841943382491
5	19	0.191648339894412	0.220013039916782	0.198654098307782	0.196879978477943	0.185499359454287	0.186255166080248	3.29687475285306e-05	0.0410028496545609	0.0452669145321174	0.1020415601656	0.164855840118202	0.19234394559437	0.186255166080248
5	20	0.193691107150616	0.217171525782785	0.231557856556654	0.222008025140943	0.201089803972113	0.206407095520927	0.0419716173790187	0.161748467147485	0.104525994551683	0.109247223131366	0.161122238413733	0.178744667388802	0.206407095520927
5	21	0.181900351325455	0.222107693670898	0.230046627088228	0.229844072941363	0.226278871592008	0.203598540563746	3.20774936567436e-05	0.0495502198484707	0.0389057345714749	0.0982583414465086	0.169164641867277	0.176300297736248	0.203598540563746
5	22	0.190438611968464	0.233421660578758	0.239330930009564	0.180439959386604	0.239372576147586	0.193139626676012	3.34509252125428e-05	0.04749395760494	0.0255493813249722	0.140586865546387	0.138206226696653	0.185491210367786	0.193139626676012
5	23	0.186048671852326	0.186666576214288	0.246059768937094	0.186993843489753	0.173971678739076	0.217137949508343	0.0886711347994271	0.0787845349783918	0.0269354136316985	0.0497314512618022	0.166718843047629	0.209557821017409	0.217137949508343
5	24	0.200457761680503	0.206205046751326	0.238979521145903	0.171590296174471	0.21748092927499	0.201685300494826	3.0562467251353e-05	0.0935944049494718	0.0862671283450079	0.121383211694246	0.149616253643657	0.211770109118438	0.201685300494826
5	25	0.19600545299468	0.235218892792544	0.211585351131761	0.223747390873503	0.186175355816059	0.209357411996627	3.15181699749388e-05	0.0954833770757909	0.0680235915490128	0.0926547770091284	0.151775970274529	0.192383674517188	0.209357411996627
5	26	0.181915215674776	0.208905592534809	0.206269877583857	0.184946845138098	0.208747399224477	0.238052073028187	3.42361856217693e-05	0.0360646444597561	0.000267105166352686	0.106682901842651	0.16205001224838	0.186281109285198	0.238052073028187
5	27	0.18720984446462	0.243443885006937	0.219859567450808	0.17665815361078	0.177942702555845	0.192488364969508	0.0479489630109084	0.0947696310401549	0.121125455114258	0.124138748720488	0.156540677216777	0.181057625494564	0.192488364969508
5	28	0.206117811642061	0.196055408342982	0.203749532722185	0.226981568690885	0.183788953917413	0.208573526843027	0.0310372825394372	5.87255781451806e-05	0.0828352954609419	0.126928483284885	0.133557068673043	0.188577168589968	0.208573526843027
5	29	0.187873813748	0.223904697518676	0.164948265199575	0.180122908064936	0.205073218088997	0.231453593434694	2.40112648636522e-05	0.0711192138818648	0.000459308932655797	0.10477252286633	0.151427066629366	0.168152562074566	0.231453593434694
5	30	0.186377802838047	0.225546357784652	0.266972732483723	0.186815044807883	0.223663046884275	0.231630185443345	0.0210274967099499	0.0547272257253942	2.92591282929199e-05	0.14028975389589	0.179112279342172	0.180120828969118	0.231630185443345
5	31	0.171953499612067	0.21566010987174	0.246323613349726	0.191186088268784	0.191505101668448	0.226426859679097	0.0353961271036975	3.05659737546413e-05	0.000272750546675617	0.0990833694892782	0.152648825372999	0.171827225323295	0.226426859679097
5	32	0.179670494897569	0.203019570425598	0.230259023984473	0.255272581371737	0.154973533907675	0.202505593316324	3.07911516853387e-05	0.0422639988408004	0.045222380464736	0.0963068042936458	0.176151908421575	0.171879801593433	0.202505593316324
5	33	0.207316235282852	0.220008243532649	0.249909882341032	0.176295730653405	0.240399427732396	0.223650583020261	3.42263661273494e-05	0.0424384551909249	0.098982039021584	0.0931908658930469	0.120686791330021	0.201772812489755	0.223650583020261
5	34	0.192025947519978	0.233553327087527	0.233903556050804	0.199596932795272	0.198206514940618	0.182156185031371	3.28216329264728e-05	0.103549415577347	0.0933871382024314	0.135265227800778	0.151175934378842	0.177347917356414	0.182156185031371
5	35	0.190667211018299	0.235014800942438	0.235553642332073	0.206936414690914	0.1789457919402	0.215562427451593	0.0412376922999271	0.0274597199520056	0.0347925879777368	0.0733623902219253	0.150698232627596	0.193812373793257	0.215562427451593
5	36	0.20494689037706	0.233527674973963	0.208069698171018	0.220485759632812	0.171308248769954	0.209391292387547	0.0392342013841472	0.0220887581124302	0.0731233466028495	0.111998818715043	0.183934748019403	0.196290355292536	0.209391292387547
5	37	0.189230358241407	0.187372178765247	0.223410918152265	0.195994154648394	0.186140786426924	0.21423283262124	0.0188565009698695	0.0420693730905517	0.0256727804294572	0.0902040717182413	0.1491539438699	0.187554339149477	0.21423283262124
5	38	0.177149743787897	0.234041339819513	0.23930108578229	0.213685051353276	0.176586000810589	0.225481070922777	3.37432788357337e-05	0.035523703123492	0.0487763242711146	0.142599155027934	0.173186795211789	0.218340998709454	0.225481070922777
5	39	0.175831853891885	0.23718549072826	0.23970401900496	0.194190863042348	0.139421746724183	0.22605906908685	0.0939070167102416	3.38668320044581e-05	0.0923629953207363	0.137755845275355	0.174128712150658	0.196978314699527	0.22605906908685
5	40	0.16025557723229	0.20633417824371	0.207228523297893	0.174141545904692	0.196413150570807	0.201952230473962	3.36832154881747e-05	0.0597562411364567	0.0805357630377704	0.123577456434899	0.163648017517618	0.160627378850793	0.201952230473962
5	41	0.186902944581401	0.220058727497243	0.248210389738274	0.218116085673403	0.228143469698498	0.19650994532545	3.39581228486065e-05	0.0465973507695003	0.084220132703768	0.0892997352570589	0.14308540154109	0.180607758255454	0.19650994532545
5	42	0.17950746316801	0.215459985596283	0.226955042280772	0.225262071999147	0.188315868917814	0.203581987243375	0.076902763851334	0.10048817156423	0.0459324023717759	0.153008775405677	0.152714906981643	0.176851188645922	0.203581987243375
5	43	0.186714916470376	0.234422899227856	0.222484834306681	0.225088115707179	0.215803204409145	0.218933075090945	3.176958357914e-05	0.0350124637451261	0.0482658292843508	0.142546889375794	0.170882612650161	0.203577676365744	0.218933075090945
5	44	0.170998129997653	0.216823522705638	0.242646403162166	0.200586558843456	0.158251549854776	0.206761573525074	0.0531886031095889	0.0925818182549115	0.0367984479060834	0.13846414629422	0.159541744072427	0.188961337244918	0.206761573525074
5	45	0.18332760291314	0.225036478796565	0.229545795221946	0.219744001738762	0.192589336468222	0.227478957014512	0.0370363736450399	3.20203497731785e-05	0.0533230357110414	0.14398537039985	0.16156494364823	0.184052292364538	0.227478957014512
5	46	0.165367599200613	0.219355585407576	0.256000306780839	0.20936052043964	0.159820191341729	0.176865677055888	0.0411645613137558	3.17522649795533e-05	0.105559162803796	0.101228534433108	0.187194099150354	0.195921352581363	0.176865677055888
5	47	0.183842243379285	0.208192236180725	0.234806688654217	0.179629282007272	0.179881722683308	0.232931840107569	0.0858949017393126	0.103437835856676	0.0440347276773966	0.121156915470845	0.144893283249423	0.196770191842268	0.232931840107569
5	48	0.177764781376159	0.228847039571682	0.244369300674999	0.253948296223417	0.187253302512596	0.220297057559511	0.0210110742082894	3.0388700285685e-05	0.000805087760760649	0.136997645322578	0.18101280552309	0.193755685858434	0.220297057559511
6	1	0.179699639545738	0.188986520821258	0.185914836595257	0.19233666739744	0.26161132630253	0.222731255088731	0.179699639545738	0.171900600889445	0.156135200293756	0.134120761327866	0.110590470944791	0.0793388884305476	0
6	2	0.158258173565597	0.199081015303556	0.201483359808559	0.201894936582507	0.25352254033995	0.202820461695138	0.158258173565597	0.166096195952514	0.15848919311138	0.137521644106389	0.102995775802165	0.0819226223685615	0.057488102258834
6	3	0.171565497665039	0.192935847265012	0.19701797687949	0.203783624536296	0.229400114751622	0.197898869350281	0.171565497665039	0.171911769036822	0.145339251218764	0.134141621701451	0.0998080099597136	0.0760828199405326	0.0731265106425318
6	4	0.171932000100787	0.184835396109001	0.203456314824773	0.209717880445125	0.263931037825515	0.21720670029541	0.171932000100787	0.178332505595123	0.158600193659767	0.13257628787114	0.101404300707039	0.0845589374755006	0.0656848346287548
6	5	0.162873219705373	0.191351396659531	0.197926676465021	0.198505924565622	0.248175905456864	0.257598720736858	0.162873219705373	0.163719780051651	0.159822509613345	0.133254827555475	0.099651984098332	0.0718612360132941	0.0676832456209779
6	6	0.158451659306554	0.191246801931116	0.194630961263332	0.203699027806806	0.207712866254369	0.249003714523706	0.158451659306554	0.159032361518182	0.160285355798707	0.138638331858333	0.0928872334056409	0.0682077481432561	0.069903381059793
6	7	0.164591342632949	0.194381974199382	0.202643410212584	0.193686791215192	0.222481672873891	0.19533144437851	0.164591342632949	0.15173914711029	0.156265683882381	0.132297337471969	0.098330579500263	0.0960930820007177	0.0721336863665891
6	8	0.166523278541806	0.193394871888136	0.192955030900916	0.190629594848466	0.216368768650089	0.246811779478043	0.166523278541806	0.160462209441829	0.156897402483535	0.13616763936261	0.101472171826751	0.075945248929325	0.0675247641186976
6	9	0.171295976466502	0.202703799190004	0.190355090290642	0.190456459852617	0.213497982286919	0.20539379585513	0.171295976466502	0.159674151119175	0.157750955910769	0.137387589195262	0.106132545619569	0.0833844600118103	0.0603744332757048
6	10	0.167073033625902	0.198033117921849	0.205084286037183	0.189810644005071	0.196519691293456	0.184025326062379	0.167073033625902	0.150108072859339	0.166165152983162	0.138165862519001	0.103547930360175	0.0921544427132042	0.0726508885886071
6	11	0.172002378595484	0.188928422006137	0.205227243948711	0.190477871064921	0.215499410250965	0.206682499392098	0.172002378595484	0.146586399237092	0.147885386124228	0.146694585995918	0.104318410278174	0.0712118097782937	0.060583196795391
6	12	0.177960174538743	0.193270946814014	0.20307176352076	0.203582856290283	0.200845002170519	0.20489854071909	0.177960174538743	0.157627742644638	0.149029738222785	0.14031883595267	0.0971826436491664	0.080696169232774	0.0714466566008311
6	13	0.171180302613253	0.190759003574462	0.205872557002045	0.213552191400182	0.222310027579899	0.205126329292174	0.171180302613253	0.155355550830645	0.156173034483209	0.139323687353725	0.101431679057365	0.0770365469404779	0.0677365941816746
6	14	0.175197706833246	0.205160931904127	0.196198862569781	0.19646587452884	0.214865040445112	0.201952487329781	0.175197706833246	0.155673339468902	0.14615655173135	0.126618730376185	0.105040055738106	0.0806162560809661	0.0753155881089295
6	15	0.15747194963714	0.198235396707258	0.188283687878409	0.194216358408111	0.208942084793176	0.200804921428713	0.15747194963714	0.162086265149108	0.16454252332103	0.137997866058056	0.106957813796922	0.0760944989506792	0.0707462915303692
6	16	0.174140991192921	0.187163256995279	0.188600282475825	0.202631808582061	0.188218100948578	0.233547066152976	0.174140991192921	0.147862964376568	0.154504633097557	0.141922871435887	0.0962157768298752	0.0801343635479126	0.0584086280811544
6	17	0.170740315545153	0.190513472950065	0.19272235874981	0.200289520050713	0.19834638454978	0.130979858130691	0.170740315545153	0.149997388437686	0.15193007114981	0.139867399014328	0.108601948078207	0.070863852480082	0.06353330839944
6	18	0.173016752893822	0.187227603129645	0.21024022520773	0.211645943129287	0.201150965363437	0.192922558221301	0.173016752893822	0.159974233020165	0.15311719579961	0.143658330363425	0.0983323858972478	0.0742807168722492	0.0856448579658595
6	19	0.171198478061218	0.185666222253323	0.190239788224695	0.214388362307937	0.19424745942267	0.202685725863066	0.171198478061218	0.164685749147913	0.151423003867728	0.125005823579023	0.09885979123333	0.0760382497546259	0.0608992250401082
6	20	0.178027559992786	0.201457219182768	0.183127109957028	0.211043046685948	0.218475851994514	0.188801872030233	0.178027559992786	0.16032063185315	0.151531438533922	0.134114711137692	0.0888660807506324	0.077631254092481	0.065131403382684
6	21	0.155520150113469	0.185108114696736	0.203320732195081	0.211332404478746	0.185684748302309	0.198441402898087	0.155520150113469	0.155345972671783	0.154131795274997	0.136043740698179	0.113459231050281	0.0791532205610621	0.0684098409668489
6	22	0.163356477682863	0.206116640967191	0.196799829687357	0.188525541729066	0.198686101076051	0.20914610637291	0.163356477682863	0.161717907331247	0.148775452086442	0.135703183166223	0.103197839948951	0.0812705456949386	0.073469125329072
6	23	0.179605502320083	0.187457429185706	0.21162943779135	0.191221336063109	0.198937719667562	0.193560524119518	0.179605502320083	0.147648747853711	0.145791076485315	0.136647366920588	0.0967361034496252	0.0731559338507079	0.059298305414881
6	24	0.16919555999402	0.200231175979921	0.190695247819102	0.20267486901749	0.236242761530728	0.200475997779896	0.16919555999402	0.158642326054704	0.160095638459122	0.133280444671804	0.101504236044342	0.0788198330435371	0.0746928182952075
6	25	0.174280563450295	0.208967858930419	0.206904594643001	0.192375598323334	0.225785335693414	0.192543319181331	0.174280563450295	0.14810467527657	0.156483172833583	0.13337171618789	0.0896030735402639	0.0771654995643233	0.0681984533120921
6	26	0.16988376356806	0.188151626338571	0.195153690653974	0.197232023517223	0.204990545251865	0.181715269655613	0.16988376356806	0.162784524052475	0.149150927111704	0.133404784237596	0.104574855896109	0.0668073604821709	0.0696832080915796
6	27	0.169806612738899	0.208802704039307	0.207736725919359	0.206509371350257	0.190202232868709	0.199530030670633	0.169806612738899	0.157179273281165	0.148998628021969	0.140375798543306	0.0974560037533132	0.0892091672046532	0.070775916565353
6	28	0.153313633646951	0.187159140250774	0.195686818039089	0.204721170475006	0.200860949852529	0.188884744054725	0.153313633646951	0.153010924968368	0.144334097213142	0.12501006948099	0.104336081669249	0.072455985422791	0.0617553976651784
6	29	0.166582066410305	0.191599570614451	0.191102688694649	0.192579375304149	0.261852931497885	0.206456823723866	0.166582066410305	0.156261652065113	0.152284233231063	0.132155578506113	0.111380251397786	0.0875960897605259	0.0681243035407448
6	30	0.165233396076767	0.185191946282575	0.190298701678494	0.192505015519154	0.2373972357189	0.191348859163498	0.165233396076767	0.157424380861911	0.1552349134308	0.134611162671817	0.103377250510786	0.0767927530348479	0.0807317032084328
6	31	0.173008432459988	0.201522781779963	0.193711659770992	0.213292177001266	0.194270361323801	0.210730434155388	0.173008432459988	0.157296041722198	0.146849562417807	0.133819371196757	0.085144488327541	0.0714456327441468	0.0705997998941491
6	32	0.167957892818948	0.194025307448894	0.181146735248319	0.194457494594481	0.201572800834981	0.254963849819804	0.167957892818948	0.160090770551615	0.155836553574305	0.135124206191344	0.0889410475668286	0.0799586318096952	0.0875509486430429
6	33	0.162057619806895	0.199913617430613	0.192957497424749	0.189552444705768	0.216845695491349	0.297956307809046	0.162057619806895	0.1560627133604	0.150549641245367	0.127431673989433	0.10215991062636	0.0751652204719691	0.0816358640682057
6	34	0.176430928684134	0.195445099639903	0.183029766664446	0.189912883353544	0.1800760522373	0.264596402275151	0.176430928684134	0.157700780837065	0.153600125314246	0.133727414786918	0.0911958208154719	0.0642202740251427	0.0775682834088506
6	35	0.154576361176067	0.181531283409446	0.202084286794445	0.203935212820961	0.202210830858918	0.216552317204851	0.154576361176067	0.15495127303503	0.151693601887102	0.122025682713065	0.0946049890580916	0.0896640872010706	0.0875613042591103
6	36	0.167684979927037	0.188700091130682	0.188751741639758	0.199735411417223	0.203472349361867	0.24757583919999	0.167684979927037	0.161675029088904	0.159650990998159	0.128629857543345	0.0866008364839009	0.076575909539031	0.0895642465366333
6	37	0.170321222588626	0.201220533911426	0.194107256641286	0.193458495925774	0.200748207923163	0.241925957971339	0.170321222588626	0.153962541044903	0.152465883673683	0.133678541192042	0.093311139349866	0.0670759909814914	0.0853667863089937
6	38	0.164771291849202	0.201776772834378	0.191872771486455	0.187348029965403	0.203841449248515	0.207041818018483	0.164771291849202	0.153633220493702	0.161535675733542	0.143324845501342	0.0975919435423249	0.0701248745911587	0.0958607811165914
6	39	0.169203323421865	0.179574535103783	0.193424753668642	0.211090528090037	0.204282557277262	0.212127685151395	0.169203323421865	0.157407975074949	0.149531788836379	0.115949909242775	0.0957330844291625	0.0742486609221527	0.0918400784342428
6	40	0.170958899787458	0.197853998213509	0.197917075750022	0.20904151285641	0.198507295073424	0.188330890205176	0.170958899787458	0.155534789509287	0.161693244819991	0.122479746951939	0.0962592175999366	0.0623209895318511	0.0941930438975768
6	41	0.173729047520714	0.18416727465368	0.205209674817698	0.208193835895582	0.294219775451203	0.204769631295984	0.173729047520714	0.164139700879603	0.158125931526892	0.130690907941398	0.0731786440214041	0.0827834216888884	0.0782432158875853
6	42	0.160922249268643	0.208619133981254	0.183354289496638	0.196794452328951	0.190890838089107	0.21370196512572	0.160922249268643	0.164136040350642	0.146125710593013	0.122049014844364	0.0896912309178981	0.0651722151684248	0.103984381814335
6	43	0.159554569220252	0.186514064020168	0.205223713906314	0.209741561670986	0.27202979705908	0.207536788035194	0.159554569220252	0.157887948388665	0.144593446579065	0.121960161998156	0.0820390157806142	0.0803423600392876	0.1010589899377
6	44	0.1613992734185	0.189543425630871	0.190809118805498	0.201911446298113	0.194900123667777	0.208645540403602	0.1613992734185	0.144973993951949	0.149564808231538	0.130365677112545	0.0926540466480663	0.0726304393241401	0.104241588035389
6	45	0.165484755127217	0.202411373026263	0.190379692281706	0.205400635302951	0.182254538880797	0.209040260153294	0.165484755127217	0.161879585522378	0.156623452984571	0.12745858220708	0.090951330038753	0.0823951902513877	0.105125395407727
6	46	0.155619482027138	0.196351941451074	0.196312641602044	0.202805735673918	0.224527048982747	0.209791047060122	0.155619482027138	0.151816303325105	0.149366849833996	0.127714938060444	0.0838405320800479	0.0708973171462433	0.102542891472673
6	47	0.168223782704905	0.193476582965245	0.196034512769452	0.197450352574628	0.266942821035074	0.201942134709242	0.168223782704905	0.167544532520897	0.146704746652609	0.111249404172169	0.100270280716729	0.0748456280957228	0.1068145634322
6	48	0.161252151655583	0.201616181675006	0.204231279974389	0.209657906390257	0.231173394356865	0.214106545528443	0.161252151655583	0.154061203802856	0.148607235167639	0.113716475282047	0.0784160034326255	0.0664751807031377	0.116812286185843
7	1	0.0351013087197721	0.0614042405753643	0.0352195893516896	0.0355519984777738	0.0482068404897296	0.0217163119464793	0.0351013087197721	0.0473103466679118	1.81466466811175e-05	0.000242054559097056	0.000440005398838895	0	0
7	2	0.0352267050867838	0.0448758047461012	0.0399599866708948	0.0362228680008647	0.0210020509681217	0.0414266475773036	0.0352267050867838	0.0448771594439894	1.85595496132224e-05	9.74400148198387e-05	0	0	0.000212851429709987
7	3	0.0658619259203174	0.0431945723096984	0.0349123585623778	0.0272335863402472	0.0415847256093	0.0230200904878828	0.0658619259203174	0.0489281521167057	1.89812946310431e-05	0.000333607828195326	0	0	7.13443342172313e-06
7	4	0.0473794219480049	0.0550969900655459	0.033853237505023	0.0177729677750289	0.0410994277566292	0.0130812229412566	0.0473794219480049	0.0169237552872516	9.309742662191e-05	1.4482355591981e-05	3.74931762431686e-06	0	0
7	5	0.0671626456510173	0.0559061828376389	0.0339602783213401	0.0240207182446515	0.0452243291935475	2.30047924938224e-05	0.0671626456510173	9.11651082533361e-05	1.87864178686806e-05	1.06095617617941e-05	0	0	9.40723752298588e-05
7	6	0.0465456319084	0.0546534324499983	0.0353173908235493	0.0490905423819968	0.0492542604762302	2.32388543999358e-05	0.0465456319084	0.000144292908390554	1.84334008179564e-05	9.29446635255479e-06	7.54783686035618e-05	0	1.04111032307629e-05
7	7	0.0321143707121232	0.0639592419023922	0.0364999824733807	0.0267915362440239	0.0438591206144842	0.0246835853295341	0.0321143707121232	0.000134460272637237	0.00014218248594859	1.07217564813897e-05	0	0	1.01331085108888e-05
7	8	0.057955493752095	0.0639285251899782	0.0360948557525243	0.0184426571698361	0.0477988177707269	2.30200831645064e-05	0.057955493752095	0.000141554223336509	1.90669150500513e-05	0.000178188006165593	9.74045658885659e-05	0	9.92207204365892e-06
7	9	0.0631779633160203	0.0429485239789009	0.0336026408762279	0.0396603088871325	0.0504371050464022	0.0208912865079631	0.0631779633160203	0.000154644310434488	1.85030269309463e-05	1.04407129339886e-05	0	0	1.07990660940532e-05
7	10	0.0472849034250838	0.0576881513859942	0.0346837686463721	0.0177537479649597	0.0389193632736912	0.0295348076164578	0.0472849034250838	0.0234489211175176	1.85484528577419e-05	1.01128390571101e-05	0	0	0.000235157205329289
7	11	0.0580008621102557	0.0697986901179526	0.0334954345164234	0.0432692060397932	0.0398368996706067	0.0176806234588455	0.0580008621102557	0.000240371632836679	1.84421239883421e-05	9.24704117830604e-06	0	0	0.00016840770574311
7	12	0.0594581276318709	0.0506899311125696	0.0328591235364894	0.0506629881401233	0.038163118261453	0.0172854416816043	0.0594581276318709	0.0468413476821297	1.85297832057752e-05	1.11400008470099e-05	2.91814288229407e-06	0	0.000141876066871906
7	13	0.0724368131584045	0.0580114082485197	0.0345738178705012	0.0413877982077101	0.0399292124703214	0.0222790614563479	0.0724368131584045	0.000165716381720603	1.88374411825985e-05	0.000183290175646574	0	0	0.00217846575934895
7	14	0.0617445635565933	0.0442463777816588	0.0322192083257477	0.0394577813757366	0.0221068661908275	0.0211462537323066	0.0617445635565933	0.000114023890712592	1.82933075769636e-05	1.00609087418552e-05	0	0	0.00172982041366832
7	15	0.0640100509484438	0.0611783003787663	0.0339505163615019	0.0405040842253537	0.0399129838065821	2.37236822299751e-05	0.0640100509484438	0.000146853961905163	1.9199687808307e-05	9.46665795765561e-06	0	0	0.000148478663378649
7	16	0.0635519035297775	0.0419535311784484	0.0358998167585483	0.042315220874127	0.0367798758816559	0.0285345741947127	0.0635519035297775	9.96332970500429e-05	1.85251407907578e-05	1.06103947919216e-05	0	0	0.000120876987834304
7	17	0.131882910130818	0.0527582118932256	0.0335047743702737	0.045811385183652	0.0419327318843591	0.0238003793962849	0.131882910130818	0.000155515122777926	0.000123683413737856	0.000198147373925819	0	0	0.000132664359119141
7	18	0.0933216398236846	0.0589289870554678	0.037082630371287	0.0453467796875036	0.0186504416067116	0.0347582681656207	0.0933216398236846	0.000130261699234538	1.91298044298765e-05	0.000194843552998277	0	0	0.000186407101353166
7	19	0.064512446559315	0.0627008270168196	0.0348841057620878	0.0476239675013875	0.0381677913842338	0.019663664483414	0.064512446559315	1.60462418170495e-05	1.90008894406582e-05	9.35780211461247e-06	0	0	0.000155000487988191
7	20	0.0741223921086335	0.0385125772763254	0.0324668850375821	0.0418128332617869	0.0385986995655764	0.0326070294722862	0.0741223921086335	0.000137278301044328	1.89261627499792e-05	0.000377949354787069	2.30102439414948e-05	0	1.25761327605614e-05
7	21	0.064855343839143	0.0633730195178392	0.031271323897405	0.0364903784154027	0.038670878527659	0.0440952826017028	0.064855343839143	0	1.86368220681876e-05	1.03405665599851e-05	0	0	0.0791108272519289
7	22	0.0587212624091069	0.0505035701948071	0.0375831318601492	0.0396287576649745	0.0396595797221222	0.0450552992830558	0.0587212624091069	0	0.0270475509664553	9.30933139481896e-06	4.08716951671753e-06	0	0.0335091012812049
7	23	0.0703289187620481	0.0548078544649894	0.0331156276066079	0.0359010989411833	0.0522414793887547	0.0266310847744189	0.0703289187620481	0	0.0217469229373802	1.39115471131178e-05	0	0	1.79910152824494e-05
7	24	0.103395101199331	0.0547653301757738	0.0321277635090854	0.0357441487080538	0.0422706315936942	0.0497721692393517	0.103395101199331	2.73704222635722e-06	1.85599002225926e-05	1.07038876523505e-05	0	0	0.00259740168813372
7	25	0.0686429438384666	0.0615859843292488	0.032583985680937	0.0444569034855246	0.0412425261625941	0.0225262128563018	0.0686429438384666	5.52675196673999e-06	1.86274402078717e-05	1.01495124713902e-05	0	0	0.0697941417504659
7	26	0.0740406171301076	0.053315014586728	0.0291164124977027	0.0396850606857463	0.0118441294379716	0.0361877390437102	0.0740406171301076	0	0.000101185360915153	1.06614581862831e-05	0	0	0.0337304454703541
7	27	0.0696362661282714	0.0486014709478373	0.0305393462137395	0.0486976979869235	0.0180093974102538	0.0223073735292998	0.0696362661282714	5.70208650606347e-06	0.000112108466356755	1.00843556380868e-05	0	0	1.92537587406455e-05
7	28	0.0442989115756492	0.0551252472797201	0.0206247450771997	0.0416603613403348	0.0365575757699165	0.0323570604484684	0.0442989115756492	0	1.92768838686002e-05	1.03346889033078e-05	0	0	1.87257890672553e-05
7	29	0.0391107019653052	0.0475483107620233	0.0390171859195386	0.0425607820583324	0.0373417321785062	0.04183687802302	0.0391107019653052	4.9091729356755e-06	1.85175840462556e-05	0.000165223804409289	1.45813469332207e-06	0	2.0947628851711e-05
7	30	0.0704950406764958	0.0538380413039366	0.0372336370991619	0.0442549922418063	0.0372955292544422	0.0425844864456017	0.0704950406764958	0	1.92300805362332e-05	1.05137546168418e-05	0	0	0.0328279342738588
7	31	0.0379921967397495	0.0469034660721292	0.0289729043336316	0.0464661728114656	0.0367192518743262	0.0449129320313002	0.0379921967397495	4.74155895970867e-06	1.88546519540425e-05	0.000108081861955096	0	0	2.08303637709332e-05
7	32	0.0390956323631892	0.0511628180578906	0.0305508978477086	0.0449620568944937	0.0373953245633872	0.0153214503809635	0.0390956323631892	0	1.86210376818561e-05	0.000198702301032811	0	0	0.0347465818215158
7	33	0.0397341589292249	0.0379083642824351	0.0367079970592244	0.0343203795797565	0.0410516872537935	0.0427668866666429	0.0397341589292249	5.07533059595757e-06	1.83389177102269e-05	0.00017087642826645	2.55539652407038e-06	0	2.06332765178659e-05
7	34	0.0355793801524802	0.0286333093307719	0.0435372226253014	0.0379050592321328	0.0235258289921362	0.0412896046463168	0.0355793801524802	1.05698524587846e-05	1.86976775055483e-05	0.000188931052222499	0	0	2.03045628829825e-05
7	35	0.0595343698744066	0.0459353344263804	0.0475082781579025	0.0372554421497872	0.0246438854655333	0.0587178322945656	0.0595343698744066	1.03554722949588e-05	1.94382914873711e-05	1.10211904463628e-05	0	0	0.00227437014772426
7	36	0.0448773975207854	0.0506182448010149	0.062863913664373	0.0447812027165501	0.039970103352751	0.0498462235637518	0.0448773975207854	1.01433766318656e-05	1.88239630624131e-05	0.000186101836106617	0	0	2.08494916841589e-05
7	37	0.0436507418651154	0.0463129992077183	0.0481409692718678	0.0382279285177341	0.0367628115704758	0.0467652478924874	0.0436507418651154	0	1.86556904123352e-05	1.09475905967748e-05	0	0	0.022683293829696
7	38	0.0460754278316687	0.0493890989279657	0.0661601762429867	0.041170416580089	0.0360668127591066	0.0406058901830883	0.0460754278316687	5.5122932393872e-06	1.88766834559473e-05	1.02807043490358e-05	0	0	0.000114848701206699
7	39	0.0501576364997602	0.0559554119191702	0.0462534376928308	0.0176095134187246	0.0277466973275696	0.0177051711396477	0.0501576364997602	1.11885107392806e-05	1.8454487920591e-05	0.000193034335466102	0	0	0.12115619218251
7	40	0.0501642769717082	0.0474763365124755	0.060479553061727	0.0264412776904621	0.0364279354816344	0.0422848180200283	0.0501642769717082	1.12898673476423e-05	1.82870184171746e-05	0.000183041184264861	0	0	0.0223100457882024
7	41	0.0501597497736974	0.0413322345142629	0.0573184174548368	0.0462566269869621	0.0365923039872059	0.0416913208016631	0.0501597497736974	1.14693367253779e-05	1.9271648042249e-05	0	0	0	0.0446737312600287
7	42	0.056013152122449	0.0429319067007175	0.0611788467554196	0.0371622524096357	0.0309091501292853	0.0224544723374857	0.056013152122449	1.16457514136415e-05	1.90000858714695e-05	9.6778153403288e-05	0	0	0.0437352624018302
7	43	0.0578172305792304	0.0466373966302252	0.063093425915646	0.0385939560606024	0.0365259457423345	0.0431005952168375	0.0578172305792304	1.15712616117492e-05	1.9240393392884e-05	9.65242580245357e-06	0	0	8.18213217795529e-05
7	44	0.0579406222157351	0.0454553118018398	0.0554641112911324	0.03518527519386	0.041075245384902	2.37842583109029e-05	0.0579406222157351	1.24195369220287e-05	1.90595776025563e-05	0.000193200369227684	0	0	0.0503635061977712
7	45	0.0619370074514036	0.0455105640942348	0.056565352336769	0.038887113228606	0.038439415149725	0.0385826423119735	0.0619370074514036	1.22425244054599e-05	1.93382745665347e-05	1.08822809295363e-05	0	0	0.0468965450217707
7	46	0.0301667624036127	0.0479488811927672	0.0524691564295315	0.0378396967075945	0.0474685682568361	0.0416334821731076	0.0301667624036127	1.14206226788146e-05	1.91198961771556e-05	1.08377587487697e-05	0	0	0.0392456092835281
7	47	0.0281675936274462	0.0413674294107705	0.0646298560704643	0.037278646757953	0.0183687872224292	0.0416948718741401	0.0281675936274462	1.23434781169099e-05	1.87120309613143e-05	0.000183782320949495	0	0	2.05570866437376e-05
7	48	0.0320179056280106	0.0408401956544556	0.0453165824775156	0.0399942479690473	0.0362571063920274	0.0211234435993504	0.0320179056280106	1.27363711244684e-05	0.000185723220729166	1.0359903034596e-05	0	0	0.0474549271841212
8	1	0.11206765844352	0.0788209582340605	0.0803905805776212	0.0888316872067836	0.126036133076197	0	2.69102504165408e-05	0.0665858133739532	2.43785805143889e-05	0.0714372059840396	2.57628255632958e-05	1.21863091690725e-05	0
8	2	0.167764726590485	0.118003856486042	0.0759081015831411	0.0861449069872156	0.084726139379309	5.40282664949097e-06	0.0340710973547899	0.0741041939633866	2.46761299138069e-05	0.0498902388873429	2.54671125246002e-05	1.25708682698421e-05	5.40282664949097e-06
8	3	0.166246491895426	0.0808175862246859	0.075695863912963	0.0959676066347825	0.10732581368744	1.4381226168496e-05	2.48378270273609e-05	0.030889320112593	0.0783601399623541	0.0651291137789138	2.60165380081808e-05	2.44293308317129e-05	1.4381226168496e-05
8	4	0.170239694120103	0.0762343845094532	0.0784109289464147	0.0775657657959224	0.0981171139032662	1.88985088556289e-05	0.13780922728398	0.0508893443930499	0.0633816995665955	0.0463000165057999	2.60005751851953e-05	8.51405841292964e-06	1.88985088556289e-05
8	5	0.132905827926436	0.0749064496972064	0.0740189699474462	0.112385679191792	0.0907763848232754	0	0.0598508794496459	0.047222197572551	0.033219157222121	0.0641892692951766	2.4763940403863e-05	8.4680960245011e-06	0
8	6	0.169824538946552	0.0777256997890534	0.0794626054773255	0.107486346858841	0.122466603040406	6.56703597323131e-06	0.0355135840076918	0.0581969572777115	0.107408876379656	2.54669412933014e-05	2.57741929382284e-05	1.94680026362197e-05	6.56703597323131e-06
8	7	0.115047902302603	0.116106540852049	0.0892984171422089	0.0806213718280019	0.0685930878296621	1.80869665843903e-05	2.52120742322941e-05	0.0354500348612804	0.0585857155535425	2.5438307810473e-05	2.54346159101414e-05	1.30882857210872e-05	1.80869665843903e-05
8	8	0.181950177498858	0.0683515487985337	0.0773107673091036	0.112501442056984	0.0992292810313599	2.63841734956909e-05	0.0736578140569831	0.0825489871005636	0.0761334117838909	0.0472108465774859	2.55823417731113e-05	1.79964844604322e-05	2.63841734956909e-05
8	9	0.136517938251231	0.0779720550941389	0.0704843239038304	0.0781597536304439	0.0748851093827454	0	0.0574843475346002	0.0550967788353995	0.14836476844651	0.0689090918092601	2.52428702459265e-05	1.35484648916353e-05	0
8	10	0.14387332725135	0.0736360532661898	0.0792080625538029	0.123404330891979	0.0833430843991264	2.13213174913637e-05	0.0822323056203977	0.0421199464471282	0.0813337268507223	0.0962654061316465	2.48374319776845e-05	9.57641596918307e-06	2.13213174913637e-05
8	11	0.164319737099336	0.0795470947289857	0.0825969473607177	0.104927097410901	0.102541813726333	2.67736070723184e-05	0.0696442426164658	0.140023949044377	0.126921362911625	0.055502186354092	2.53255516220143e-05	1.23532971808607e-05	2.67736070723184e-05
8	12	0.166481692912001	0.070723972230244	0.0717664769339033	0.0801210618105989	0.0805851742954588	2.59659608992013e-05	0.130415622889358	0.0495815791189571	0.130466782916788	0.0761534474194298	2.52229832353502e-05	1.295580128435e-05	2.59659608992013e-05
8	13	0.161340216867371	0.0772607300186902	0.0729580095965201	0.128620454402505	0.102223590165709	1.86351257195967e-05	0.0664585768323763	0.0536790009162288	0.0556085648759748	0.0532496975567485	2.52701007746765e-05	2.66872336251427e-05	1.86351257195967e-05
8	14	0.166375129573293	0.0724496216934437	0.08607651665086	0.0880804440354445	0.116143120579426	2.65851971942857e-05	0.0505879814315492	0.0760533338977431	2.48861270654277e-05	0.0747535881102326	2.55854501670196e-05	8.03220593317524e-06	2.65851971942857e-05
8	15	0.139330223222824	0.0700043361069483	0.0845044935177268	0.0786863520383661	0.120117721083397	2.61924722467984e-05	0.132200382931248	0.0594290434742726	0.122899945250912	0.0487808506906064	2.50863575897366e-05	1.25622204899626e-05	2.61924722467984e-05
8	16	0.163682400835319	0.0740573727472442	0.0859102674627327	0.111686016490982	0.140544690377045	2.68189215247584e-05	0.0377594821857377	0.0698852092525547	0.137825332092331	0.0672866822991817	2.45049341133489e-05	1.31985497400411e-05	2.68189215247584e-05
8	17	0.130088935668428	0.113850775886534	0.0815653736132493	0.0760006795029442	0.0775830748595388	2.75629218985589e-05	0.0541305932774194	0.127432685504968	0.0956444641501256	0.0486672833375652	2.54110627744705e-05	2.35012103064318e-05	2.75629218985589e-05
8	18	0.171604258892799	0.0731762560434066	0.0797421087082764	0.108604146576834	0.0752116833865785	2.68556980641845e-05	0.0985618102129261	0.0574391802816643	0.141871802760441	0.0728628492860608	2.55396957703199e-05	6.61718774836421e-06	2.68556980641845e-05
8	19	0.105758815299988	0.0723450838958251	0.0807303456503552	0.08075296140914	0.115351097488334	2.61472133549862e-05	0.0630806444062418	0.0862868389468491	0.0782355439318991	0.0542208924585336	2.47744165238541e-05	1.85129530133121e-05	2.61472133549862e-05
8	20	0.165652851488707	0.0716213302669654	0.0793574694351912	0.12204902643413	0.0812801595624443	2.79176007123133e-05	0.0508587707451444	2.37005985987269e-05	0.0668226819641928	2.54404406302659e-05	2.58662935937313e-05	2.53205582685092e-05	2.79176007123133e-05
8	21	0.182063327065622	0.0744818864971922	0.0740906853852923	0.102446406833056	0.0994572747300033	2.68206623508855e-05	0.0537009362809822	0.0770982800947679	0.0806643445679567	0.0747574986503214	2.54527048004475e-05	1.27281845285506e-05	2.68206623508855e-05
8	22	0.10834527725759	0.0783883638167284	0.0777487148639227	0.124575607727166	0.0837096612846917	2.60864310343648e-05	0.0800457558763381	0.0658269586589558	0.0568560088806168	0.0492717323301455	2.52415428715732e-05	8.34305299034372e-06	2.60864310343648e-05
8	23	0.169744430212602	0.0783179847323569	0.0724971129010075	0.117024731433943	0.109121478136328	0.0348186886993597	0.062189515217741	0.0389062165092315	0.0891496645496164	2.57825769079484e-05	2.49271206297087e-05	6.36778816172905e-06	0.0348186886993597
8	24	0.139781164935715	0.0716988185005629	0.0763360108991993	0.109391485454519	0.0797634389997603	2.66422262827632e-05	0.03771152284639	0.134432645260234	0.0545879465016861	0.0488554894782247	2.58203665995672e-05	0	2.66422262827632e-05
8	25	0.162814426641054	0.0724805865556745	0.0736858767884116	0.0889964748770697	0.0966813566074805	0.0400062366850467	0.0516635100832403	0.147476411283075	0.0906086347834102	0.0494726622452674	2.5221472612589e-05	6.1987364497679e-06	0.0400062366850467
8	26	0.136753103278435	0.126494010215564	0.0740676160986446	0.0791331555953404	0.0802420670407052	0.0455575307749393	0.0466391832139817	0.0321421894443133	2.50954677089739e-05	2.57691986164944e-05	2.52544598058881e-05	2.00373024593135e-05	0.0455575307749393
8	27	0.136888816535214	0.073823644025507	0.0789703592508361	0.0799873913359976	0.146954987032683	2.64290809600987e-05	0.0623168223001533	0.130009677530491	0.0868250927342698	2.56923525079871e-05	2.56716317267088e-05	8.73686739896831e-06	2.64290809600987e-05
8	28	0.133353533243428	0.0698568477887994	0.0878453416508618	0.0812765699499322	0.107558401998295	0.086234669901776	0.0816571291785738	0.0742249668456938	0.0669015314836423	0.0693962809060744	2.55143728524883e-05	0	0.086234669901776
8	29	0.159750640435232	0.0669615974729896	0.0764484465037156	0.0750475019980585	0.115811261134531	2.69620892130575e-05	0.069769470916595	0.0549880571291365	0.0727751665217607	0.0498628096177402	2.57361595267396e-05	5.16956429231497e-06	2.69620892130575e-05
8	30	0.161589581202308	0.109417861409588	0.083762142802139	0.0787065867349105	0.126649785773556	0.137528540772867	0.0407085825200182	0.0402029011299717	0.0551480427426891	0.0484711338788876	2.53487955872932e-05	1.23904222075695e-05	0.137528540772867
8	31	0.136719712877452	0.106961333277975	0.0816574083307175	0.123430553334047	0.0799124800757	0.0655468227045403	0.0510253083513368	0.12744898642488	2.48294232701287e-05	0.0783133465018277	2.57637674449691e-05	8.39142295665894e-06	0.0655468227045403
8	32	0.169466748138694	0.0643616457692345	0.0827749869798922	0.089791872685772	0.0799873053983629	0.0914222709891975	2.48682879421129e-05	0.0754883706055473	0.0566442261064962	0.047531213498724	2.59072441403081e-05	8.70661494052875e-06	0.0914222709891975
8	33	0.13907944236818	0.140387055461035	0.0797852449898306	0.0840085337432219	0.0999425189739735	0.0437639585709512	0.130066343727082	0.0436592883643302	0.0373151974321175	2.60390453026493e-05	2.53266293883767e-05	0	0.0437639585709512
8	34	0.173356258595105	0.147302481379814	0.0834838836756356	0.0813303328113135	0.113409056217259	0.0813993952809987	0.0900915998037392	0.138587564865368	0.0561446999740471	2.59505650679604e-05	2.54805032898824e-05	0	0.0813993952809987
8	35	0.133541248265429	0.154254033851703	0.0784400211954719	0.124948439909538	0.114789013795393	0.0270698613686018	2.46897721737161e-05	0.0950937368850521	0.124523856520129	0.0463921740616083	2.57238797902306e-05	0	0.0270698613686018
8	36	0.145850077075634	0.144055321814318	0.0711767874764717	0.0823469271004147	0.113161810380965	0.106057913308684	0.0866953150183137	0.133549433014666	0.0617867540524193	2.6247825913297e-05	2.57492808042772e-05	2.87640821846612e-06	0.106057913308684
8	37	0.144190995258363	0.137545287152772	0.0796217988410522	0.0825207518240742	0.108052446400255	0.0654520378091355	0.0755736091991312	0.0918577681060822	0.0561005983536841	0.0518130168686662	2.56277525744233e-05	6.86368650192501e-06	0.0654520378091355
8	38	0.147857214095324	0.135880058834403	0.0797180300324074	0.0856128677881286	0.101520624120969	0.11350777157229	0.0453706901173065	0.143556228972638	2.50519287523824e-05	0.0817936300697656	2.56032091197897e-05	8.73425759027926e-06	0.11350777157229
8	39	0.143271380541237	0.141498400477794	0.0818408348920195	0.0806875533935862	0.118651082639983	0.109612438131414	0.0791775877443153	0.0660856850185969	0.0434464868227731	2.53912516517149e-05	2.5421087812845e-05	0	0.109612438131414
8	40	0.109867726208366	0.129345719388925	0.0836949304162948	0.074956396908407	0.138649363979928	0.0757966712152427	0.0821794882921392	0.0416994935492682	0.14237557924079	2.61797314919464e-05	2.54699540897417e-05	5.58093018339483e-06	0.0757966712152427
8	41	0.107358833251153	0.143585182848596	0.0797844700738699	0.0938388979546781	0.125680517587646	0.0969086310003405	0.0727278690721933	0.0597902194864505	0.0407367777383078	0.0824228744630103	2.50518576358369e-05	7.22319454265245e-06	0.0969086310003405
8	42	0.142438620850881	0.160581482829174	0.0768895312230583	0.109103275855903	0.082135215545431	0.114971134030079	0.0414578924408371	0.0803200000872212	0.0792271907212005	0.0512330798603392	2.59088970312783e-05	0	0.114971134030079
8	43	0.14487237078582	0.125774481086066	0.0839873037237216	0.0891485965739875	0.0807996875901785	0.0887027198180559	0.0627664603676665	0.0636132654212803	0.041230344122386	2.57567072838727e-05	2.48996493490769e-05	6.65077574859414e-06	0.0887027198180559
8	44	0.121707770359354	0.125426173528323	0.084202325161113	0.0822585313533077	0.116067034095636	0.070134348119672	0.0432405448649982	0.0918653725503622	0.0714573048892314	2.59228786226468e-05	2.61619747566608e-05	1.2859784628409e-05	0.070134348119672
8	45	0.14856156238112	0.125811972599898	0.0830142695356901	0.0819673394514491	0.103152810287635	0.108636761671942	2.48886154621943e-05	0.0525270952897708	0.093993779143922	0.0803264467897143	2.52600339816087e-05	8.7440868090989e-06	0.108636761671942
8	46	0.114467940955435	0.120722495925514	0.0673492523257085	0.0786813911499834	0.082752709820583	0.0796171177940877	0.0442944878307032	0.0517049835250926	0.150984560789821	2.56158903965218e-05	2.55792620152826e-05	0	0.0796171177940877
8	47	0.109081594846706	0.135328666820016	0.0858753625410394	0.0761505107640847	0.11693189947561	0.0868783882032408	0.0730607234359626	0.128072939171581	0.0497965983212293	0.051665872605383	2.58352280363198e-05	0	0.0868783882032408
8	48	0.132055324130224	0.119978441067528	0.0736187258422924	0.0751229212632058	0.0836088027840721	0.0857068508607494	0.0446648308552142	0.0792165497993389	0.0611203191165972	2.62425603592347e-05	2.59886677794194e-05	3.01324895357089e-06	0.0857068508607494
9	1	1.57471883394853e-05	2.11696215929647e-05	1.20262557214631e-05	0.143715031118376	0.0609691500092889	0.0762790176154905	1.57471883394853e-05	0.187082245732277	0.177933530577658	0.0868735541219257	0	0	0
9	2	0.00315459011366931	8.10537637718587e-06	0.0920610117666517	0.0976895954472351	0.0967589624214342	0.0920084857654149	0.00315459011366931	0.166961244591733	0.168917638377008	0.122167444088921	0	0	0
9	3	1.99627096583117e-05	0	0.103005600258642	0.136010031101938	0.120129486122414	0.0794400000415209	1.99627096583117e-05	0.148547304311948	0.186909365506688	0.155993667010345	3.76559757571635e-06	0	0
9	4	1.39474248590615e-05	0.000119500107951892	0.143199156795824	1.4393894686108e-05	0.129816119578937	0.0928581623558609	1.39474248590615e-05	0.159935146237898	0.157846919377235	0.177288775304138	0	0	0
9	5	2.06040049474037e-05	1.53570907521464e-05	1.60369839580425e-05	0.145724685969608	0.107986024799728	0.0545956904060453	2.06040049474037e-05	0.126955941077586	0.162768925959657	0.132838062791006	0	0	0
9	6	2.41179489692711e-05	7.32187703611986e-06	0.101391011340343	0.126747906462317	0.121888442276121	0.0436584460195818	2.41179489692711e-05	0.162853330176785	0.166001875768645	0.172495849062224	3.63320208982563e-06	0	0
9	7	2.31947291100183e-05	9.61838111135773e-06	1.59801590350732e-05	0.131455346644071	0.108673969010569	0.128708768436957	2.31947291100183e-05	0.24951629323674	0.170935430930804	0.125553561095529	0	0	0
9	8	2.94836532567241e-05	1.68310332142946e-05	0.125285831378638	0.127450666697692	0.115788099341458	0.0801709898312497	2.94836532567241e-05	0.14738593614361	0.15450907663597	0.17287467807016	0	0	0
9	9	2.38619866502674e-05	9.50933721853024e-06	1.13752054650263e-05	0.134489347793318	0.11516218370836	0.0869117216593004	2.38619866502674e-05	0.192527312569716	0.156015428350522	0.149758623007986	8.93604502693981e-05	0	0
9	10	2.69474602164012e-05	0	0.0367745159998345	0.111701919248731	0.114175317790405	0.107705609835415	2.69474602164012e-05	0.169067303340263	0.149844618567088	0.176786961022704	8.23734085484815e-06	0	0
9	11	2.91319095906936e-05	1.22562924410189e-05	0.0372699235626834	0.115433004699204	0.0230895492518574	0.0986253574580667	2.91319095906936e-05	0.177760043523573	0.118743870120524	0.150989508050333	0.000183911639339413	0	0
9	12	2.5536476195474e-05	1.01098332285267e-05	0.189245728035451	0.121352677254164	0.173350183223638	0.0707149044434231	2.5536476195474e-05	0.148192545618942	0.169395499422064	0.167923790281598	0	0	0
9	13	2.76532013769615e-05	9.62090738384417e-06	1.52138530696261e-05	0.129741969736524	0.11726208400493	0.0657254645681206	2.76532013769615e-05	0.175027804805632	0.146194775413746	0.155916894575412	9.84725375772294e-06	0	0
9	14	0.0444591471433366	1.72019039024064e-05	0.120805394324846	0.144676892484533	0.107109623426529	0.121455106862505	0.0444591471433366	0.13892658108906	0.153521816625842	0.168806305817064	0	0	0
9	15	2.13881187237548e-05	1.22058180963701e-05	0.0851119326658903	0.153637502402886	0.101569916027749	0.131446239799025	2.13881187237548e-05	0.140938445129296	0.161678240801862	0.116745925351018	1.19810410414918e-05	0	0
9	16	0.0142341108630006	0	0.0769656635690637	0.116082041380019	0.0938667921054793	0.119826537697347	0.0142341108630006	0.147714445751608	0.185205980066449	0.15957801643515	1.25390434469479e-05	0	0
9	17	3.02019952382408e-05	5.45327335322858e-06	0.0490086993080863	0.127176880979725	0.124834806907265	0.131817729126539	3.02019952382408e-05	0.141807008559742	0.167877244573523	0.180796373677732	1.88011912554118e-05	0	0
9	18	0.033877156334282	1.86692554707117e-05	1.69562511769028e-05	0.150503924613758	0.0616792029650533	0.0924442362792147	0.033877156334282	0.148977093385449	0.189001110635396	0.134219556831314	0.000362041059717409	0	0
9	19	0.0256265123945005	1.73412662826851e-05	0.0635933755641614	0.132192021855534	0.129639584680864	0.0864298804243628	0.0256265123945005	0.163129684200753	0.182400928816008	0.171362541861561	9.66505743492464e-06	0	0
9	20	3.05155427553782e-05	1.26717978968487e-05	0.142097262528427	0.114203230704639	0.134189781761143	0.0891943333473038	3.05155427553782e-05	0.147427139921828	0.15736327620427	0.199730749555833	1.00306335552096e-05	0	0
9	21	0.0151745828442819	1.43332854439758e-05	0.0464656863121698	0.126559255594061	0.0780569574386123	0.139334134048446	0.0151745828442819	0.175505841232581	0.160468117092956	0.135698940353974	1.4019366353145e-05	0	0
9	22	0.0202422644189989	1.31539831580766e-05	0.0431468621920837	0.125056304563853	0.0813923524179905	0.11131232393316	0.0202422644189989	0.142697373822574	0.155525622538444	0.125722918248545	0	0	0
9	23	3.33213035882466e-05	8.4829873691134e-06	0.0888024913376961	0.123183607659986	0.137697214298119	6.87784103961796e-05	3.33213035882466e-05	0.212982520088388	0.161839592424221	0.167358403343619	5.0934365469006e-06	0	0
9	24	3.67976953953725e-05	1.24373313933042e-05	1.3264992094505e-05	0.13550535356624	0.13112190520811	0.084028512433614	3.67976953953725e-05	0.134762927841256	0.166202912165777	0.152506275949317	6.79538484472191e-06	0	0
9	25	3.3145314851131e-05	9.65219288202123e-06	0.0958205693479968	0.16950598674668	0.0767289102892942	0.102207820268106	3.3145314851131e-05	0.160907455564541	0.163967199865419	0.150036780599758	6.93822413598236e-06	0	0
9	26	0.0219144247086196	9.68498614385899e-06	0.123126664729698	0.103494974945422	0.0712180054294126	0.0893052107013166	0.0219144247086196	0.166055081582027	0.149960983521277	0.134878465769718	1.18592590542357e-05	0	0
9	27	0.0513181638690764	0	0.117753825928337	0.144195378675997	0.0573494316036858	0.121969013822962	0.0513181638690764	0.161622325362406	0.172572687386985	0.149083355408093	0	0	0
9	28	0.0364183335258878	0.000167015152505552	0.0443286507525362	0.118734241495568	0.0874357062919527	0.056008434609154	0.0364183335258878	0.156774860777021	0.161924455227501	0.139762391072357	0.000204534995369886	0	0
9	29	0.0408269082687384	0.000122071310074981	0.0728975672950772	0.09673478188761	0.0760471819864109	0.119633697506215	0.0408269082687384	0.15003107109979	0.202961247867421	0.125246611491629	5.67359469172227e-06	0	0
9	30	3.35763061856419e-05	0	0.0578413651369908	0.171555966745051	0.0978796872679972	0.1395082269209	3.35763061856419e-05	0.159381256519169	0.158625210610791	1.60128102532814e-05	0	0	0
9	31	0.0273157496118594	0	0.179218117648323	0.125616702904092	0.0665903896601088	0.0293461175055843	0.0273157496118594	0.162586483580699	0.154141551149162	0.153442432647842	0	0	0
9	32	3.21132306905367e-05	4.25140423775289e-06	1.55763621092063e-05	0.0639108920256351	0.107123819895092	0.0235619382194785	3.21132306905367e-05	0.16662036918952	0.162341969386533	0.157156267324362	4.33322875945473e-06	0	0
9	33	3.10320569553678e-05	0	0.0622757500491763	0.103818955362181	0.063996318466051	0.102502051236333	3.10320569553678e-05	0.162917257977031	0.134042489246858	1.33221072418631e-05	0	0	0
9	34	3.89038615171624e-05	0	1.91373542961738e-05	0.100458048706162	1.28826136214183e-05	0.0436521236270841	3.89038615171624e-05	0.144551584811735	0.16284216750679	0.100423674384739	0	0	1.02659845185064e-05
9	35	3.64741028544408e-05	0	0.0782954154935486	0.135864833197018	0.0678493744071707	0.118124043376955	3.64741028544408e-05	0.166177237181222	0.130424453766373	0.105386373139973	0	0	2.89346282024147e-05
9	36	3.56725244911791e-05	0	0.0543301283186595	8.9210498906959e-05	0.117370711834316	0.0571212809551042	3.56725244911791e-05	0.167688430500244	0.12473297573303	1.35029301401255e-05	0	0	0.110900069472178
9	37	3.35016947944968e-05	2.05609605817069e-06	1.39593058281355e-05	0.0758415833158165	1.36948593649887e-05	0.101579280464019	3.35016947944968e-05	0.192067685557262	0.149885882108802	0.0901156357577547	0	0	1.6932105648168e-05
9	38	0.0233724094509448	0	2.06704229658768e-05	0.173564087581198	0.163833042423469	0.0788249499582932	0.0233724094509448	0.172649706050672	0.127043431505603	1.88866306412341e-05	0	0	0.268168325576192
9	39	0.000450856169105374	0	0.0422140028568358	0.133616767005614	0.0641655678903912	0.129413708421633	0.000450856169105374	0.163919385657895	0.126727838315114	1.26673836374009e-05	3.92873607125224e-05	0	0.245989092984048
9	40	4.01313292891154e-05	0	1.7798042310607e-05	0.0945358597425434	0.0699020762531796	0.0516344030567795	4.01313292891154e-05	0.138047168928549	0.183656896051858	2.0524960766372e-05	0	0	0.266493386453863
9	41	0.0246576008005984	0	2.02978333719198e-05	0.104707726015039	0.149293179568234	0.099842326043821	0.0246576008005984	0.147553574071979	0.145523514731551	0.0441663417535933	0	0	0.234712737060998
9	42	0.0654806442788862	0	1.96638762373718e-05	1.35916286406737e-05	0.0869278059045843	0.0966770228826536	0.0654806442788862	0.149157304362529	0.163785032948513	0.0430287180626414	0	0	0.246788887311697
9	43	0.0288402500519462	0	2.34465408980958e-05	0.160710083592125	0.0863696236355424	0.123942865271768	0.0288402500519462	0.154030233858873	0.121274479953324	1.30929125412948e-05	0	0	0.23962223780752
9	44	0.0983903830314728	0	1.98032839515461e-05	0.114537613433164	1.34908525240572e-05	2.07377674359579e-05	0.0983903830314728	0.142839309069672	0.132255259873983	1.73792407250911e-05	0	0	0.266687173482143
9	45	0.0951044874398962	0	1.98361349235637e-05	0.0652801033297848	0.0663027069033656	0.0969944635082449	0.0951044874398962	0.152840750352591	0.141929915065197	1.89212245582156e-05	0	0	0.245685860595646
9	46	0.0723287510094861	0	1.86742429742344e-05	0.104245537505242	0.0705109000486581	0.0808780774817378	0.0723287510094861	0.16824019995985	0.1277545103342	1.90224314651697e-05	0	0	0.234818035041347
9	47	0.0541139187084285	0	2.01492657556978e-05	0.032833621288277	0.0805156671922374	0.0414139540466626	0.0541139187084285	0.168461088554455	0.135176536101211	1.68636907927186e-05	0	0	0.245568844499966
9	48	0.0467179586462606	0	1.44988787661133e-05	0.126111015186266	8.27923529894555e-05	0.042576406973368	0.0467179586462606	0.156494852705545	0.153830378855651	1.27280549209076e-05	0	0	0.233380934763517
10	1	0.0933807095158172	0.107410555321947	0.0782954409238021	0.0658919055897274	0.0500326436961868	0.0454314647401186	0.0933807095158172	0.128342960216224	0.140473284389631	0.122642773477372	0	0	0.260501962379007
10	2	0.092840841783512	0.10685876964234	0.101409554933136	0.090365258208558	0.0524729001447456	0.0400020893812818	0.092840841783512	0.122368512907865	0.127866299409369	0.121086131972196	0.264238416567828	0	0.258881290847758
10	3	0.101839340212412	0.108583847540449	0.0939416049901856	0.0609125327499438	0.0510927899233124	0.0420384050593419	0.101839340212412	0.154013583431665	0.130025457554241	0.114247372488997	0.358182474519773	0	0.380989158728797
10	4	0.0618396148565368	0.113772536447482	0.0858723408025669	0.0855853952328843	0.0482160753315255	0.0378882745319449	0.0618396148565368	0.150577345101283	0.135898518731395	0.095057255375629	0.21415130679445	0	0
10	5	0.0895944974616977	0.0812467422321564	0.083545264740095	0.0949879407777761	0.0750155831042965	0.0370013836998036	0.0895944974616977	0.167040760778517	0.129200226109938	0.11467932047961	0	0	0.1487184078909
10	6	0.103459559803299	0.108134042064872	0.0878708798058549	0.0624473696046706	0.0473549746520374	0.0367568283977535	0.103459559803299	0.127719126927128	0.121167191446089	0.121333645929218	0.291505292287213	0	0
10	7	0.0865045556536158	0.109474413957696	0.0986757010652621	0.0534414069654899	0.045009894401347	0.0406409364144896	0.0865045556536158	0.13276451460493	0.127565673119049	0.106134087132943	0.357018125667146	0	0
10	8	0.0804210180083872	0.106429560867455	0.0811169262182673	0.0541238679348456	0.0741400386478459	0.0355661352890901	0.0804210180083872	0.160440548267118	0.128402596251805	0.133171662900584	0	0	0.280569139556801
10	9	0.0845540398475665	0.108466313453674	0.121308516030601	0.0307994439247799	0.052964090994095	0.0382576139281617	0.0845540398475665	0.133000334795462	0.134596678077174	0.120982798969203	0.295214777658344	0	0.000328628523628591
10	10	0.0765864484861504	0.112475984285839	0.0894789590826245	0.0653774172482838	0.0722887132786138	0.0381599227922013	0.0765864484861504	0.123685149850409	0.125235205792685	0.106447075448242	0	0	0
10	11	0.0900103471605015	0.112402642821613	0.112536484371833	0.0514648423480715	0.0512336036901668	0.0416716119130604	0.0900103471605015	0.155464094756624	0.126097031375391	0.140045643542698	0.285283562275699	0	0.194636875099375
10	12	0.0924139453956242	0.108437882429591	0.0804237820763495	0.0625440516377942	0.0483341447960139	0.0367876638134283	0.0924139453956242	0.144596129986834	0.12774810804613	0.103681541371044	0.310586181835161	0	0.186204153978258
10	13	0.0895973674457372	0.106417467991015	0.069221312156303	0.0616368936999292	0.0732618157094718	0.0370290834003565	0.0895973674457372	0.127616481818309	0.134889261218053	0.117092440388307	0.317390994763317	0	0.10842103889454
10	14	0.103043063981712	0.101565265145922	0.131338107551884	0.0543717492121516	0.080001182184328	0.0375002328735416	0.103043063981712	0.135199975705306	0.132324836561848	0.158248455204005	0	0	0.286093669613974
10	15	0.0917150722758064	0.10034340082895	0.0847433281848623	0.0582909746914044	0.0931577234658373	0.0383597773751026	0.0917150722758064	0.132669445464979	0.128638019948446	0.128253859139603	0	0	0.249302900724603
10	16	0.112328532836626	0.104281609576585	0.128222416518146	0.0783210009417472	0.0442632756736933	0.0429911791521491	0.112328532836626	0.162964288415995	0.128402047995063	0.154674319456464	0.272422839693847	0	0.0302187886585858
10	17	0.110546804417154	0.105892210053798	0.0996549355328918	0.0550169695941815	0.0767228939735736	0.0415327347669121	0.110546804417154	0.148865114254002	0.133418288050516	0.200304360108442	0	0	0.235260763996581
10	18	0.105858303444032	0.106262366535682	0.104783318017488	0.0613370767780337	0.0580593297560597	0.0387982085168094	0.105858303444032	0.134822468411844	0.140838108530055	0.198908728681298	0	0	0.0920509945602268
10	19	0.117387720562988	0.105746322634609	0.135319012514604	0.0622749501713617	0.0631558097075336	0.0395294735402358	0.117387720562988	0.133986013678993	0.133023959232526	0.215324458271996	0.238159341751355	0	0.220478190194445
10	20	0.0957416992609946	0.112389030843054	0.0905372705382171	0.0590474963468263	0.0549486815122509	0.0375186561751569	0.0957416992609946	0.16363821250671	0.130986138245251	0.195864102455065	0.331844938946662	0	0.318999545538232
10	21	0.212629817519032	0.107178152757771	0.101964052102878	0.0327366979258421	0.0792362126553003	0.0402607045775569	0.212629817519032	0.1497953793234	0.127942868219778	0.21701199990592	0	0	0.363952364571567
10	22	0.116174145981467	0.103886129456491	0.128274576714346	0.0620570763645479	0.0563450538730989	0.0416032450877656	0.116174145981467	0.125339386038715	0.144464900230646	0.206923825949377	0.237420804100391	0.079557020691814	0.0938952199158633
10	23	0.103822710319723	0.107821131867704	0.12361539777942	1.61949351965044e-05	0.0540155242553717	0.0346434053751118	0.103822710319723	0.134926973118656	0.1285093555541	0.195318684138058	0.260808016230777	0	0.185142288481974
10	24	0.121045616750503	0.103260252312496	0.093363320674212	0.0621039986632126	0.054718850835461	0.0387900717221833	0.121045616750503	0.149557939390468	0.126961894237384	0.208297217357267	0	0	0.0838313688460282
10	25	0.163695669309885	0.106983163566806	0.0922301472548233	0.0585132696299825	0.0631326728197942	0.0379576738910767	0.163695669309885	0.142203431859886	0.128514775958701	0.190000055876421	0.369113376082566	0	0.119188168644918
10	26	0.0898715491188518	0.10263401963206	0.112370788237174	0.0547555043522863	0.0598168991420902	0.037107387558509	0.0898715491188518	0.139332976934635	0.124962423732832	0.218607856082024	0	0	0.0402228305550528
10	27	0.125532296461436	0.100043605823163	0.117136653189755	0.0312338410410587	0.0591858011942011	0.0394175417737073	0.125532296461436	0.127904830148689	0.132638477448324	0.179601602500918	0.364847689148985	0	0.124708448616019
10	28	0.153735299924984	0.0987702383504957	0.105171353553162	0.0559923468060144	0.0550266224434206	0.0438245001033902	0.153735299924984	0.11810352443049	0.131908589897543	0.232794829548422	0.396052744556888	0	0.0761894247092742
10	29	0.196805632279121	0.101800946354619	0.10892107377919	0.0483663138518107	0.0621268863588373	0.0372556270651348	0.196805632279121	0.129872549967921	0.13017031860637	0.245076047386337	0.228809295276583	0	0.07347669727365
10	30	0.077226910796184	0.0986546291357448	0.0959539290774396	0.0330295674320035	0.0529219042142372	0.0354320362037633	0.077226910796184	0.154462113421455	0.132884125167025	0.171541317866627	0	0	0.0898044270831455
10	31	0.120096648245585	0.0978806755949465	0.105303194203911	0.0662797507391335	0.0533878826492607	0.0379003383584129	0.120096648245585	0.136473974283772	0.148084355470917	0.182167844028472	0.352873491512266	0	0.061106119389619
10	32	0.180734697317977	0.0908343486775672	0.106633249552203	1.61863109090714e-05	0.0586045905328401	0.0568849019322235	0.180734697317977	0.124464897098218	0.135788010046816	0.18094859504927	0	0	0.0924230952048082
10	33	0.164821396744744	0.0767946376909546	0.097638275184316	0.0572609133113018	0.0489757358514477	0.03622767603692	0.164821396744744	0.126898211632713	0.134254319566948	0.198103050857698	0.333350076697484	0	0.0696643359281005
10	34	0.151541001819116	0.0808042309389889	0.0945287644480431	0.0579096334415988	0.0599989854425405	0.0380599984138841	0.151541001819116	0.151746413950987	0.127172280134647	0.244902659111514	0	0	0.0748815171957645
10	35	0.133789701263752	0.11409890224348	0.0943885980063793	0.052006925697942	0.0660581712447196	0.0402416716827583	0.133789701263752	0.139065700365801	0.151182863850775	0.15784890442117	0	0	0.0733505795870543
10	36	0.151786841978862	0.09037389228058	0.0931896909336498	0.0512983059049961	0.0706708835692919	0.0388680211007739	0.151786841978862	0.162187803436801	0.141562304773655	0.20056165084247	0	0	0.102206816168641
10	37	0.116394185711435	0.0758760077582244	0.0884718349061479	0.0861418865710481	0.069610317328495	0.0591386049439095	0.116394185711435	0.148923938153553	0.149301677488203	0.217883883195387	0.33068726442126	0	0.11373586280175
10	38	0.100778821462365	0.0753208062438865	0.0872695301164263	0.0572350264411887	0.058778223433062	0.0368295228750428	0.100778821462365	0.156997055793802	0.137379614284332	0.174503202226037	0	0	0.11167924678184
10	39	0.127499968299251	0.0962447256359813	0.0875923103889221	0.0601886961228966	0.051746771754161	0.0416076517611824	0.127499968299251	0.142967266711839	0.126407652468012	0.283691748225612	0.31853518405532	0	0.0932098827737804
10	40	0.112807545703326	0.0662128266063083	0.0913080274582316	0.0553208540200935	0.0552052802549177	0.0393228813069681	0.112807545703326	0.134073804026412	0.14037710381854	0.172595679699647	0	0	0.140274592018803
10	41	0.128554796020704	0.0713505760044149	0.0868964867304264	0.0679887708868685	0.0637247658690572	0.0355368587219451	0.128554796020704	0.134817928041702	0.122574188704732	0.161644284932498	0	0	0.125131117230769
10	42	0.125188797533871	0.0890912238610201	0.0883665263077631	0.0565294589154376	0.0669697462242272	0.0782768317053183	0.125188797533871	0.123517406743048	0.148493929244334	0.254547248708964	0	0	0.120521637219142
10	43	0.139563566485895	0.075814901709287	0.103916284539164	0.0800555206399835	0.0580464025806124	0.0373358287025524	0.139563566485895	0.136794051877277	0.132861803369693	0.184783510060569	0	0.0801326482952064	0.145463128100773
10	44	0.114203936255132	0.0687329167230517	0.121284090672702	0.0502596517284423	0.0632258611253284	0.0604726648359967	0.114203936255132	0.122949959995558	0.138904314250876	0.299893160228729	0	0.270248914045769	0.13240969734885
10	45	0.127560933674766	0.0743305875558127	0.0875298910248328	0.0988385600201473	0.0675233320001586	0.0397684943600427	0.127560933674766	0.137215872534067	0.122215559962378	0.141222314030574	0	0	0.122906061482752
10	46	0.117585778543649	0.0636162970950992	0.108698805196589	0.098513364104153	0.0875870379043974	0.0344865354802242	0.117585778543649	0.123647629476921	0.114600737441279	0.261324594198158	0	0.0711947220913216	0.136308484362641
10	47	0.130626119828161	0.0804145150770126	0.0833715206979787	0.0693495280572352	0.0554420683779437	0.0370104414910329	0.130626119828161	0.139632337424231	0.133983163587859	0.149447570245469	0.387799260961697	0	0.176644669392119
10	48	0.164617950124654	0.0773223006049674	0.0793896216003661	0.0783616137624727	0.0665807415285392	0.0338147443279713	0.164617950124654	0.174497489753159	0.112423755149779	0.16323300982654	0	0.149404223743214	0.145081157256899
11	1	0.000342110390755091	0.104625027142369	0.0885836129722946	0.0370221463907847	0.0295267581530254	0	2.59409616187794e-05	2.41292732249987e-05	2.42018026534528e-05	1.7835930839353e-05	0	0	0
11	2	8.22817497701582e-05	0.14404468944043	0.0900527778391825	0.0261719676266276	0.0646701052753891	0	3.42984582505242e-05	0.03329313868957	3.27811949007651e-05	1.64659775679154e-05	0	0	0
11	3	8.50839943432341e-05	0.176458838161924	0.120104082718175	0.0636848798644596	0.0658726488536296	0	0.044466519665481	2.77937923504265e-05	3.35398628294676e-05	2.43449745481657e-05	0	0	0
11	4	8.56720790570171e-05	0.117549534620963	0.105793661330682	0.0524398733478164	0.0253520281302873	0	1.11895999378098e-05	0.0751815460550066	2.69215035966794e-05	1.14923638983724e-05	0	0	0
11	5	8.51691843965233e-05	0.130383508830104	0.104914189241628	0.0637793415571016	0.0685866574694198	0	2.83661647443435e-05	3.20511378831969e-05	2.58092327255918e-05	8.51856237362241e-06	0	0	0
11	6	0.000340440910932136	0.11418366173303	0.105979860615961	0.0248278377962696	0.0134573340384298	0	2.75712513740875e-05	2.1584800310628e-05	3.11049726765789e-05	8.24752471191971e-06	0	0	0
11	7	8.4217211675672e-05	0.20257848958866	0.0827825878171812	0.0703513822474966	3.44686474181086e-05	0	2.67537085293179e-05	2.43145237387899e-05	2.44906215240853e-05	1.76396709123782e-05	0	0	0
11	8	0.000624906474183163	0.102358755648014	0.118856084609488	0.0684244057662999	0.057624386725156	0	3.28406327795847e-05	2.46415450064844e-05	2.70303400082196e-05	1.4759223104466e-05	0	0	0
11	9	0.000494994098669999	0.207976977698425	0.110964616077892	0.0406785964344774	0.0430797848664193	0	3.31970646665791e-05	3.30394366086733e-05	2.45397402112744e-05	1.19767076992648e-05	0	0	0
11	10	8.30211322839924e-05	0.081866528981807	0.11016736528738	0.0327145205574629	0.0591309690443943	0	2.33051819947402e-05	1.62460562703798e-05	3.41185573266453e-05	1.74938271872313e-05	0	0	0
11	11	8.45758205203224e-05	0.186281184029687	0.0995745915051749	0.0274009244476666	0.0462278914260241	0	2.95136885357677e-05	2.65921817381446e-05	3.21931157123378e-05	0	0	0	0
11	12	8.49385817009832e-05	0.189657811766913	0.0985678637196712	0.0571606321515983	0.0421490933611909	0	3.37309718558437e-05	2.53425320587995e-05	3.31330365919689e-05	1.91674877767518e-05	0	0	0
11	13	8.59496556932192e-05	0.132283196209271	0.128657620335784	0.0626233710203405	0.0294380511493099	0	2.5068366858549e-05	3.31695641760494e-05	2.51013103768324e-05	1.77140073519011e-05	0	0	0
11	14	8.24674789582854e-05	0.0959497577032226	0.106787676029756	0.0289884013039935	0.0389678291264786	7.29442859799269e-07	3.29396008525551e-05	3.34455658583048e-05	3.25646086991504e-05	1.72402200547411e-05	0	0	7.29442859799269e-07
11	15	0.000287259836995928	0.174780622542281	0.080660136822567	0.0603499138045135	0.0567108698716539	0	2.57401590056769e-05	0.0543046903580411	2.46276973084703e-05	1.4315448880479e-05	0	0	0
11	16	8.28873746933268e-05	0.111805134497705	0.0645572313912337	0.0796258568235718	0.0284205878545182	0	2.60969711152648e-05	2.82103855388095e-05	3.32836918836904e-05	1.64811167610189e-05	0	0	0
11	17	8.35765578667375e-05	0.132894706435981	0.113885270335859	0.0291809908196817	0.0407145087312274	3.15720347465706e-06	2.87785436865365e-05	3.33769569568193e-05	2.94997437716271e-05	1.41404836051677e-05	0	0	3.15720347465706e-06
11	18	7.78614668562991e-05	0.102611654527256	0.10312395653556	0.0291956775105389	0.0505532007243086	0	3.27645789000555e-05	2.29902009378909e-05	3.35196221081431e-05	2.40827718939794e-05	0	0	0
11	19	7.78743299788306e-05	0.0527957037473953	0.12112792613862	0.0662555968147426	0.0360523169539376	7.63884167902821e-06	3.27241099925469e-05	2.90834026488471e-05	2.97027859538284e-05	8.39051469123072e-06	0	0	7.63884167902821e-06
11	20	8.09210349053178e-05	0.201729318524675	0.0981026055061235	0.0983654277219229	0.0309782713098866	6.41883955287271e-06	2.70835201354793e-05	2.44434959461071e-05	3.42117711150904e-05	1.1032997489256e-05	0	0	6.41883955287271e-06
11	21	7.92811066737849e-05	0.0780895158329427	0.143958046370072	0.0261910839964147	0.0246417697270246	1.00853218200877e-05	2.87588491016632e-05	2.53776503034414e-05	3.31818064423059e-05	1.78265455400269e-05	0	0	1.00853218200877e-05
11	22	7.6518521638684e-05	0.0755981612922639	0.140563901413301	0.0691729047260686	0.0537289876536492	9.9548943767531e-06	3.33285642877999e-05	2.9549572636317e-05	3.4811755342802e-05	1.66660833543026e-05	0	0	9.9548943767531e-06
11	23	8.29296786056343e-05	0.0799906969745799	0.0992176861454806	0.0238758343256927	0.0400159709068921	1.4572649764104e-05	2.41527103273161e-05	3.51909794168097e-05	3.40115607086487e-05	1.72429549602497e-05	0	0	1.4572649764104e-05
11	24	7.73796206874641e-05	0.102036329114649	0.118975353657448	0.0642398248572071	0.0523526099371672	1.42183532955817e-05	3.28409495800609e-05	3.31984785984995e-05	3.40252100525503e-05	8.50512263322832e-06	0	0	1.42183532955817e-05
11	25	7.82761408835501e-05	0.0561771543222467	0.131198285486836	0.0572019545889671	0.0233623835359113	1.27635513856419e-05	2.55845076130453e-05	2.38468354351137e-05	3.21279610322127e-05	2.27610925438193e-05	0	0	1.27635513856419e-05
11	26	8.22452566979858e-05	0.159617847644099	0.125692642853428	0.0898034592282304	0.0479560785245566	3.71417728639355e-05	2.30940325999448e-05	2.5743845917982e-05	2.74679383219629e-05	1.45865355946966e-05	0	0	3.71417728639355e-05
11	27	8.22842461597074e-05	0.0343256081257622	0.122433402644999	0.0260362850693396	0.0460297617270399	1.80582994092946e-05	3.32312609249548e-05	2.76981210616584e-05	3.51631579408559e-05	1.16636030306405e-05	0	0	1.80582994092946e-05
11	28	8.23709233697625e-05	0.0334104639869834	0.126206224828456	0.0779301960095878	0.0253106291581593	2.76687344860124e-05	3.4384043462745e-05	2.60299258634866e-05	2.60506924963227e-05	1.14507007292655e-05	0	0	2.76687344860124e-05
11	29	8.10121527865179e-05	0.154190324275312	0.109963494753467	0.0580990196091002	0.0401887297998119	2.8017948870103e-05	3.30531855394752e-05	2.42615586240041e-05	2.8991747464852e-05	8.61848302416517e-06	0	0	2.8017948870103e-05
11	30	8.41611408465349e-05	2.26834421465328e-05	0.135481577998513	0.0604484366795532	0.0587333323748038	3.63427466176795e-05	3.28423417388568e-05	2.41344283490627e-05	2.37012493937913e-05	0	0	0	3.63427466176795e-05
11	31	8.57274784048641e-05	0.000235169767414072	0.110095037444629	0.118717883654676	0.0363293194509564	3.64204271816552e-05	3.20455563267497e-05	2.91381733657561e-05	3.43712099391514e-05	0	0	0	3.64204271816552e-05
11	32	7.88400821975331e-05	0.0317867248588178	0.139105626159968	0.0190069043070129	0.0241682687442872	3.06597798983608e-05	2.41559172700232e-05	3.01626649134414e-05	2.36312455081094e-05	3.86279655777475e-06	0	0	3.06597798983608e-05
11	33	8.60418861786697e-05	3.25053761145548e-05	0.0696062202506524	3.06159186950977e-05	0.0414971095878901	3.6792555112428e-05	3.39416835008048e-05	2.54230409428035e-05	3.31981118074919e-05	8.33175724049683e-06	0	0	3.6792555112428e-05
11	34	8.11010105107488e-05	6.50520833857661e-05	0.110156097964768	0.0666085433401168	0.062825237008653	3.55805089068292e-05	2.7902341322142e-05	2.84589339436891e-05	2.62584153312333e-05	1.17600986877962e-05	0	0	3.55805089068292e-05
11	35	8.96576925218904e-05	5.09022296613777e-05	0.134267376733986	0.061480011100559	0.0189651042541579	3.62027968228842e-05	3.20561221798558e-05	2.25460522895068e-05	3.30879830328006e-05	1.75566492653089e-05	0	0	3.62027968228842e-05
11	36	8.89255772411606e-05	1.91752523843189e-05	0.117966553840422	0.0652634035868304	0.0452563188675799	3.67363208748745e-05	3.3773648586001e-05	2.8229644263419e-05	3.34697520480354e-05	1.15148074637713e-05	0	0	3.67363208748745e-05
11	37	0.000320915330543212	3.22350880708137e-05	0.112028747622747	0.0629931580715356	0.0599312249286886	3.66254157558641e-05	2.42459013819612e-05	2.7678018400758e-05	2.49579677837133e-05	0	0	0	3.66254157558641e-05
11	38	8.92717500885518e-05	3.6841897743591e-05	0.143354136897492	0.102378296372275	0.0454943170175588	3.82879388120313e-05	2.49975195493161e-05	2.6373179563206e-05	2.2873464516621e-05	4.04010205196371e-06	0	0	3.82879388120313e-05
11	39	8.61231897307004e-05	0.000203877055108574	0.0746625068335082	0.0631944366030982	3.23591255304018e-05	3.78756774587117e-05	2.08160004960086e-05	2.97309139102361e-05	2.21224260390872e-05	0	0	0	3.78756774587117e-05
11	40	8.94936948948754e-05	0.00050586026279949	0.0954397173187064	0.0805428915298254	0.0409287200467592	3.84522572560547e-05	3.31482018243521e-05	2.83281144436246e-05	1.15178711259523e-05	6.06042975911861e-06	0	0	3.84522572560547e-05
11	41	0.000325722135880413	2.06342131710034e-05	0.078959107091018	3.05227535414672e-05	0.0524917328094128	3.75651667607387e-05	1.62454756401922e-05	2.6131103181103e-05	2.87329852647463e-05	0	0	0	3.75651667607387e-05
11	42	0.000656017998431139	0.000791047066738731	0.147145482285244	0.0759825802693751	0.0638664254853659	3.82921208833099e-05	1.65775016279463e-05	3.18856658442574e-05	1.13491790607353e-05	0	0	0	3.82921208833099e-05
11	43	9.02255847984557e-05	0.000657143519276524	0.111604103395603	0.0444721682081808	0.0702932368397182	3.74347392602004e-05	2.71793731818947e-05	1.45872201540231e-05	2.46053424912685e-05	0.0596550717097665	0	0	3.74347392602004e-05
11	44	8.6761881607585e-05	0.000555623501123273	0.128431816331553	0.0453215010812487	0.0975449391659774	3.97515898091744e-05	3.37188466438046e-05	2.61895152080513e-05	2.91608413755008e-05	1.12060889440437e-05	0	0	3.97515898091744e-05
11	45	9.25390287907875e-05	0.000255005727909391	0.0796401489939005	0.057129232752136	0.0244178664515048	4.15765598509339e-05	3.29717606149576e-05	2.86777781114357e-05	0.000192113773434193	0	0	0	4.15765598509339e-05
11	46	8.4611953255989e-05	0.00036625541860389	0.0954342827756536	0.0537335494505904	0.0583690099968376	0.0241962950692865	2.76705529943921e-05	2.5942708632473e-05	0	0	0	0	0.0241962950692865
11	47	9.19612659240991e-05	0.000148735895172432	0.0797595520011225	0.128606028557504	0.0760405522241215	0.024118862488724	2.67694666856644e-05	3.43747674057952e-05	9.42601138773725e-06	3.45455481434502e-06	0	0	0.024118862488724
11	48	8.09539352263834e-05	0.00152871392201811	0.0798727684780675	0.100962774707558	0.0531468315770812	0.0339005637167094	3.2936035706782e-05	1.73776564890038e-05	2.47656980279284e-05	0	0	0	0.0339005637167094
12	1	0.0516507776413309	0.104406287138444	0.0770683956433353	3.42808692216876e-05	3.43078777498191e-05	0	0.0839401273691984	0.0109880835836145	2.54777504717334e-05	1.13878614508982e-05	0	0	0
12	2	0.164116262409018	0.103509842480532	0.0658461213215244	3.45917789755024e-05	3.39296995050526e-05	0	0.0143655503854999	0.0314191745107668	2.84235873253471e-05	1.46292294930777e-05	0	0	0
12	3	0.0839193362474922	0.123138568702328	0.0490360244924372	3.41067484224688e-05	3.42637423104275e-05	0	0.0229763905878316	0.0344814665876478	2.77863319391416e-05	1.15916896858034e-05	0	0	0
12	4	0.106370460670836	0.136399622069281	0.0226543552267617	3.36134356862209e-05	3.41175662845339e-05	2.73495297335175e-06	0.0669265574205482	0.046096503962004	2.87981571705651e-05	1.12009050327026e-05	0	0	2.73495297335175e-06
12	5	0.150683204741931	0.102283957223215	0.0577178130392285	3.3640636119362e-05	3.3898261538139e-05	0	0.0603893385857633	0.0505425266334669	2.69746949982809e-05	1.14592560417454e-05	0	0	0
12	6	0.0338991100973309	0.166080301665126	0.0640730022310466	3.24741098435523e-05	3.41951553005532e-05	5.27592563344862e-06	0.0306826744105796	3.02746132455424e-05	2.70828892515351e-05	1.13352138254456e-05	0	0	5.27592563344862e-06
12	7	0.0615532334508294	0.104844382245374	0.0968908352135293	3.34389170197099e-05	3.37417939190704e-05	1.16171138645489e-05	0.0664531711613337	0.0391176256300464	2.80526442374665e-05	1.09466678346746e-05	0	0	1.16171138645489e-05
12	8	0.160341924072748	0.110086113345177	0.0720931671254912	3.29595519208672e-05	3.45891626558368e-05	1.69418589242762e-05	0.0192424762531146	0.0106863418156119	2.88908425527525e-05	1.15692669369232e-05	0	0	1.69418589242762e-05
12	9	0.0535502267616162	0.0694547277936278	0.0518564964685822	3.3577149245222e-05	3.38817972875773e-05	7.23667023252857e-06	0.0213981297440152	3.04305888526304e-05	2.25571094954138e-05	9.00967458759194e-06	0	0	7.23667023252857e-06
12	10	0.17152618139155	0.119996567676999	0.0612728811194447	3.35224752672634e-05	3.43434489347838e-05	1.53864094886417e-05	0.018042528984972	3.03074453317356e-05	2.61719152977952e-05	1.10297240035824e-05	0	0	1.53864094886417e-05
12	11	3.2954849324762e-05	0.153712561762712	0.0625169995356803	3.27528129064947e-05	3.3513047214736e-05	8.45274240562498e-06	0.0178958135989258	3.07702547313584e-05	2.05670146257129e-05	1.09683398857218e-05	0	0	8.45274240562498e-06
12	12	0.100626461001716	0.113730611842429	0.0633516479935802	3.33669543045563e-05	3.43227055162316e-05	1.70872698088273e-05	0.0529136518916222	0.0193539481039676	2.77429287641322e-05	1.070064621238e-05	0	0	1.70872698088273e-05
12	13	0.137478138821839	0.125906269786717	0.106143877347616	3.26807420571287e-05	3.44661459314854e-05	1.69074531553693e-05	0.0292562875734002	0.007631139871424	2.66197083824245e-05	0	0	0	1.69074531553693e-05
12	14	0.100488682584897	0.131702699628687	0.0583408228269807	3.31685570211574e-05	3.36492915791007e-05	0.0842273553530401	0.0563814601172295	3.04450573211548e-05	2.18372553924476e-05	4.61201004326617e-06	0	0	0.0842273553530401
12	15	0.0623946243129085	0.0794523817063742	0.0498622762339994	3.2330790950974e-05	3.38773561564056e-05	8.28661065814728e-06	0.0477564059823611	3.04559673963874e-05	2.69451249008529e-05	0	0	0	8.28661065814728e-06
12	16	0.102730196496299	0.09815389735486	0.0645268884198591	3.23674553698852e-05	3.4720978039776e-05	0.0266974330466894	0.0619398361910268	3.05645876772266e-05	2.28835987562804e-05	0	0	0	0.0266974330466894
12	17	0.101143046537894	0.10023407694722	0.0837542989909604	3.33374647777864e-05	3.4450637417689e-05	0.0331910317700957	0.0100892990239836	0.0213008208703193	2.16359308407163e-05	3.983305171498e-06	0	0	0.0331910317700957
12	18	0.141578320163571	0.0920796293228553	0.0412853520854375	3.26208560380085e-05	3.3444776862561e-05	2.14527083427384e-05	0.0106991964284612	3.06032855790675e-05	2.7157637493122e-05	1.11123087714253e-05	0	0	2.14527083427384e-05
12	19	0.123660485860225	0.0815776394585781	0.0880462325484194	3.34707480359295e-05	3.39740918919698e-05	0.0424201754769853	0.0313312052144661	3.12755533931001e-05	2.69189220681572e-05	0	0	0	0.0424201754769853
12	20	0.115616389386263	0.0885868714461056	0.0579676854132827	3.299137674518e-05	3.45500228378925e-05	0.0455598991643215	0.0483923371704748	0.00994548565862363	2.73862914893835e-05	8.12518923208711e-06	0	0	0.0455598991643215
12	21	0.126276553286427	0.0533267973757771	0.0984949675087294	3.30032446581999e-05	3.46014529696499e-05	2.14094590885856e-05	0.052146752107153	3.02672193477957e-05	2.6747680672834e-05	0	0	0	2.14094590885856e-05
12	22	0.228061657247043	0.0869568869342193	0.0299583824448125	3.32964685090766e-05	3.38456455765376e-05	2.14364126602216e-05	0.0592937146699268	2.94328598664979e-05	2.09438528325309e-05	0	0	0	2.14364126602216e-05
12	23	0.121309386283351	0.0834491650083401	0.0856551517452836	3.29701284404111e-05	3.39680171401799e-05	2.30596390579482e-05	0.0466028306349164	2.98669176517268e-05	2.55469821752155e-05	3.46702048777926e-06	0	0	2.30596390579482e-05
12	24	0.11897850931114	0.0930357675182327	0.0624480751409502	3.331895856907e-05	3.35674596767996e-05	2.78907030774781e-05	0.0556560287138683	3.03518857694846e-05	2.15866923232685e-05	0	0	0	2.78907030774781e-05
12	25	0.0517948677166862	0.103590495044909	0.114934823022343	3.29835572093618e-05	3.37424280460359e-05	2.42133031612604e-05	0.0248488576539445	3.00867925760527e-05	2.1682408196808e-05	0	0	0	2.42133031612604e-05
12	26	0.166229273384401	0.103314750699342	0.0830388069112906	3.29299667188459e-05	3.40872226599001e-05	2.79925972942409e-05	0.0761121966562986	3.0222739653538e-05	1.62647370461422e-05	0	0	0	2.79925972942409e-05
12	27	0.112515581434148	0.111893338101485	0.0730810802865867	3.3046062395155e-05	3.37529854171164e-05	2.46563181172956e-05	0.0471870910280889	3.02656180971706e-05	2.58529635232165e-05	0	0	0	2.46563181172956e-05
12	28	0.102575338884897	0.094537002134101	0.0688513805968397	3.28593812409984e-05	3.39528304798117e-05	2.36582194371807e-05	0.0391607594154824	2.94393947942842e-05	2.34922379109505e-05	0	0	0	2.36582194371807e-05
12	29	0.176292653513084	0.111380225206083	0.109958909801177	3.3200996268156e-05	3.46748848798684e-05	2.85965800946325e-05	0.0518443845331425	2.85520520788358e-05	2.09283044497398e-05	0	0	0	2.85965800946325e-05
12	30	0.256299975419305	0.102456279183462	0.11562713218459	0.0515537026885262	3.42975301410536e-05	2.98546590156157e-05	0.0498830608338202	2.84636594091487e-05	2.19107596531879e-05	0	0	0	2.98546590156157e-05
12	31	0.12038000354409	0.0980057984367951	0.0814812433059859	3.30765695414873e-05	3.46053552389408e-05	2.89264113626755e-05	0.0153703413022445	2.8859774993115e-05	2.08374126221393e-05	0	0	0	2.89264113626755e-05
12	32	0.129967306458408	0.101706741076955	0.119631292244334	3.30366169952445e-05	3.37641024244221e-05	2.89032901056508e-05	0.0530679232594427	2.8766662961034e-05	2.10955094908647e-05	0	0	0	2.89032901056508e-05
12	33	0.0831072582917975	0.107328693685576	0.123756946558376	3.25684310879139e-05	3.46177242163965e-05	2.98346853851771e-05	0.0551732969497303	2.87908614547836e-05	1.62163915244864e-05	0	0	0	2.98346853851771e-05
12	34	0.118711540539076	0.0949996784033888	0.0698778264085306	3.24904188767805e-05	3.37838359513119e-05	2.90768407421162e-05	0.0266894122234911	2.96815593429497e-05	2.07692696571118e-05	0	0	0	2.90768407421162e-05
12	35	0.112530642617957	0.0979380277359857	0.117368852368501	3.35029940714202e-05	3.39569553299698e-05	3.03029751028139e-05	0.0096618115628101	3.04512834292906e-05	1.55273081713158e-05	0	0	0	3.03029751028139e-05
12	36	0.113705595887599	0.114487787714117	0.113901002237885	0.0416233661408757	3.4792824789589e-05	2.92651079439162e-05	0.0691132090791303	2.7743370575196e-05	2.12856213630735e-05	0	0	0	2.92651079439162e-05
12	37	0.109629013482275	0.104908031830143	0.111355140393737	0.0370879238452954	3.40692233808405e-05	2.92395158789605e-05	0.0455815659386577	2.74305575451179e-05	1.55864964789945e-05	0	0	0	2.92395158789605e-05
12	38	0.0809021484909387	0.0787102630883827	0.116504982626576	0.012388269655611	3.49800333231944e-05	3.05376831516345e-05	0.00873260286691279	2.66360605155351e-05	1.62698254093187e-05	0	0	0	3.05376831516345e-05
12	39	0.104774312690991	0.107239423402607	0.112045544358559	3.33287704036407e-05	3.37743479130648e-05	3.01652249389539e-05	0.0451312046284327	2.71648219193837e-05	1.58384802726052e-05	0	0	0	3.01652249389539e-05
12	40	0.135604084961735	0.105103893168454	0.0904953303122245	0.0350580742833866	3.4466981446612e-05	3.08266539199978e-05	0.0716577822915396	2.61142196956645e-05	2.11013477671177e-05	0	0	0	3.08266539199978e-05
12	41	0.102279834444004	0.0774482898630429	0.145495978051208	0.00902321756009871	3.40168295084875e-05	3.18296245007178e-05	0.0570262753625914	2.73569980968762e-05	1.57880112118401e-05	0	0	0	3.18296245007178e-05
12	42	0.126413807787105	0.110548160575155	0.0896497812602682	3.22157004259448e-05	3.40098249129979e-05	3.14472569440992e-05	0.0485776002681247	2.5866013461928e-05	2.06561773077855e-05	0	0	0	3.14472569440992e-05
12	43	0.258559974287669	0.11410142359536	0.0810569985677201	0.0594785269895384	3.40233195689962e-05	3.13913021429485e-05	0.0351217933755444	2.70672373845437e-05	1.67604284861969e-05	0	0	0	3.13913021429485e-05
12	44	0.144365101352982	0.115109556715542	0.105937899724775	3.21047125862912e-05	3.40763196692567e-05	3.07133142237865e-05	0.0758234811137301	2.66753058220388e-05	1.55371423204943e-05	0	0	0	3.07133142237865e-05
12	45	0.230293770893657	0.101203387654812	0.12398136878573	3.24034909934029e-05	3.41550492531828e-05	3.11253392708342e-05	0.0427186747302791	2.71189059246025e-05	1.54136025499847e-05	0	0	0	3.11253392708342e-05
12	46	0.151582045005104	0.0876028109428729	0.130477174352554	0.0600478785986876	3.32892780098972e-05	3.06728076721251e-05	0.0404835182403119	2.78275028153607e-05	1.61855441738664e-05	0	0	0	3.06728076721251e-05
12	47	0.180092364252437	0.0949021306421979	0.0762225835670896	0.042243159089927	3.41285737498065e-05	3.11727388476857e-05	0.0757817550736651	2.72599659934989e-05	1.61793447971916e-05	0	0	0	3.11727388476857e-05
12	48	0.141844078412231	0.0880726243804485	0.11110460423663	0.0113659971263741	3.45085729901176e-05	3.13901110243694e-05	2.82062344954189e-05	2.63954482070303e-05	1.65097526538823e-05	0	0	0	3.13901110243694e-05
13	1	0.055315378159518	0	0	0.0439749617842339	0	0	0.055315378159518	0	0	0	0	0	0
13	2	0	0	0	0.0317448439814367	0.0607541137504824	0.0778486439622666	0	0	0	0	0	0	0
13	3	0	0	0.12823274378914	0.0380430808736139	0.0933193867543221	0	0	0.0728796572799139	0.0388000652256932	0	0	0	0
13	4	0	0.0218697801992937	0.111455854382639	1.60683612354343e-05	0	0.0780240759456347	0	0	0	0.0117113021349	0	0	0
13	5	0.0878409069261949	0	0	0.0486669981368989	0.0585344050863879	0	0.0878409069261949	0	0.0665689535676862	0	0	0	0.0781011118684132
13	6	0	0	0.13240291777506	1.5084184836068e-05	0.0542855603769064	0.0727541190282854	0	0.0776724664798225	0	0	0	0	0
13	7	0	0	0	1.60097400105937e-05	0	0	0	0	0.0367262819517654	0.0330914611217117	0	0	0
13	8	0	0	0.10035149600012	0.049784583828229	0.0926201810471581	0.0786062606965471	0	0	0	0	0	0	0.144979579770867
13	9	0.115306407680472	0.00508707647586156	0	1.35202935106818e-05	0.0658497441566628	0.067108145573932	0.115306407680472	0.0703235337528317	0	0	0	0	0
13	10	0	0	0.111568232507562	0.0472777193113298	0	0	0	0	0.0436504367261494	0.0122181431644936	0	0	0
13	11	0	0	0	1.31087713415149e-05	0.0633117858959834	0.025458555866924	0	0	0	0	0	0	0.0948518258082632
13	12	0	0	0.102980455529469	0.043762342280063	0.0586330724346669	0.090495839662639	0	0.077423915418129	0.0317784244743111	0	0	0	0
13	13	0.0879972524154515	0	0	0.0145347365892992	0.0833872825799144	0	0.0879972524154515	0	0	3.02838596945442e-06	0	0	0
13	14	0	0	0	1.6050565702721e-05	0	0.0662321774657351	0	0	0	0	0	0	0.128924627912658
13	15	0	0	0.0923302198313312	1.48324753260584e-05	0.0547147624905817	0	0	0.0497766994850496	0.0506665742572555	0	0	0	0
13	16	0	0.00595334307893513	0	1.58888290414936e-05	7.5439700295663e-06	0.0697771531774135	0	0	0	0.0154573192500862	0	0	0.128607046053638
13	17	0.0621676543211577	0	0.0999947084927737	1.40079685313167e-05	0.0694425349251082	0	0.0621676543211577	0	0	0	0	0	0
13	18	0	0	0	0.0438423599367271	0	0.0890396645784343	0	0.131886701246748	0.0396622395006824	0	0	0	0
13	19	0	0	0.104601489962781	1.3565778425165e-05	0.0905478985396772	0.0452263288022258	0	0	0	0.0123202731744487	0	0	0.111269757356188
13	20	0	0	0	0.023142425811594	0	0	0	0	0.0268727227814483	0	0	0	0
13	21	0	0	0.0898135235844024	1.55996749032929e-05	0.0532969704141579	0.0606358411632868	0	0.0333996903339962	0	0	0	0	0.124331213766041
13	22	0.0820534562548981	0	0	0.0207740875318327	0.0471907326271766	0	0.0820534562548981	0	5.44457100065333e-06	0	0	0	0
13	23	0	0	0.0697294115607005	1.57326457123537e-05	0.077929914939917	0.0812309034513244	0	0	0	0	0	0	0.13709774943816
13	24	0	0	0	1.43038313705724e-05	0	0.0418070928946975	0	0.077469694383953	0.0483731295903187	2.44484251921755e-06	0	0	0
13	25	0	0.00228038497221243	0.0667003698238321	0.0299997361590016	0.0666560301422736	0	0	0	0	0	0	0	0.126564463007149
13	26	0.0891943632062601	0	0	0.0404983523517466	0	0.0991738912592178	0.0891943632062601	0	0	0	0	0	0
13	27	0	0	0.0544103619330345	1.47952193650037e-05	0.0668092201236819	0	0	0.0516608634282255	0.0442732879914792	0	0	0	0.124971847428305
13	28	0	0	0	0.0505216331590766	0.0847489247912151	0.0465561137505383	0	0	0	0	0	0	0
13	29	0	0	0.0708361885183499	0.0359703860391335	0	0.0942254689825361	0	0.0517218944587322	0	0	0	0	0.127623091712267
13	30	0.11230288375353	0	0	0.0452175736952046	0.0927571611830916	0	0.11230288375353	0	0.037041103969671	0	0	0	0
13	31	0	0	0	0.0220818822916596	0.0316531448335842	0.0662225474904172	0	0	0	0	0	0	0.205275264472483
13	32	0	0	0.0452524124330699	0.0456948532563699	0	0	0	0.0507241183917811	0	0	0	0	0
13	33	0	0	0	0.0566221102612045	0.0844046247072405	0.106216843134332	0	0	0.0147748998151561	0	0	0	0.151098417517701
13	34	0.129311046811465	0	0.0505929228764049	1.70089722285832e-05	0	0	0.129311046811465	0	0	0	0	0	0
13	35	0	0	0	0.0532728489955379	0.0682315598863954	0.0868822444917106	0	0.0512137686258277	0	0	0	0	0.114209916165326
13	36	0	0	0	0.0436028717636246	0	0	0	0	0.0684716382977406	0	0	0	0
13	37	0.150906544726407	0	0.0289888583898794	0.0266240152390646	0.0697430168455225	0.0709652720079696	0.150906544726407	0	0	0	0	0	0.162755911198422
13	38	0	0	0	0.0667012925000372	0.0661830877236794	0.092014325225742	0	0.0479463081233933	0	0	0	0	0.124327282778551
13	39	0	0	0	0.0536768064881497	0	0	0	0	0.00966393840095168	0	0	0	0
13	40	0.0791398797534234	0	0.038874171464117	0.0314035411078983	0.116159328752655	0.0627803032697467	0.0791398797534234	0.0475974568975657	0	0	0	0	0.143605642301307
13	41	0	0	0	0.0552249341462926	0	0	0	0	0	0	0	0	0
13	42	0	0	0.042391906243101	0.0544319345618683	0.0685414532215299	0.0848094989420778	0	0	0.0266743161342125	0	0	0	0.149172568112525
13	43	0.17160892844386	0	0	0.0589492034049906	0	0	0.17160892844386	0.050243827215286	0	0	0	0	0.128414399738603
13	44	0	0	0	0.0531156622181733	0.0444581011577495	0.103162869064863	0	0	0	0	0	0	0
13	45	0	0	0	0.0532024475213348	0	0.0293882562959503	0	0	0.0232359281115387	0	0	0	0.166642671539265
13	46	0	0	0.0276857459942113	0.0395203584128083	0.100729862326684	0.10490471919599	0	0	0	0	0	0	0
13	47	0.0723530970552406	0	0	0.0518000849356481	0.0753469828329845	0	0.0723530970552406	0.0472005165147647	0.0136841266654091	0	0	0	0.143844599493788
13	48	0	0	0	0.0490812982619914	0	0.0561360874848141	0	0	0	0	0	0	0.142327264544712
14	1	1.23935702157432e-05	0.17472396299612	0.114360058063278	0	0	0	1.23935702157432e-05	0	0	0	0	0	0
14	2	1.39335536692295e-05	0.0991321789021985	0.115302319911888	0.125769511897994	0.100822267250425	0.101227634834745	1.39335536692295e-05	0.159944172474413	0.0408591250773422	7.3331524491497e-06	5.12338914258134e-06	0	0
14	3	1.40063325852738e-05	0.162086879290981	0.105076843282171	0.135107555298253	0.0838987341353973	0.119139389058275	1.40063325852738e-05	0	0.110034701203277	0.0482263224893635	0	4.88197102900435e-06	0
14	4	2.11657681790061e-05	0	0.171376189938024	0.10917029330432	0.104757938959911	0	2.11657681790061e-05	0.0869955383251078	0	8.80413442181661e-06	0	0	0
14	5	0.0428868671507512	0.12330782428492	0.186962500601559	0.121997823301209	0	0.078330949064236	0.0428868671507512	0	0.119956244641587	1.52286041923311e-05	3.29197190115392e-06	0	0
14	6	1.02372272678089e-05	0.112065565824695	0.0870446008479197	0	0.0916581996023319	0.0801413249689912	1.02372272678089e-05	0.0897284703618436	0.0868020541903925	1.57969332717881e-05	0	0	0
14	7	1.65972652097797e-05	0.149783143004166	0.149762914107587	0.0917504001804176	0	0.102610131283013	1.65972652097797e-05	0	0	0.000156091782718851	0	0	1.60719328334225e-06
14	8	1.70678389262839e-05	0.124761022914931	0.167801446618686	0.10891068017207	0.0435161139242881	0	1.70678389262839e-05	6.18611674583781e-06	0.055067842835479	0	4.39380245328438e-06	0	0
14	9	1.92192746267751e-05	0.115358611959794	0.124632529325208	0	0.073930505255827	0.0813392936601931	1.92192746267751e-05	0.202288121904867	0.106674693212247	1.23499771144079e-05	0	0	0
14	10	1.83003043346686e-05	0.106784683255059	0.13221033569595	0.122566397980206	0.0868112271805573	0.117758284176081	1.83003043346686e-05	0.0989184612239555	0	1.55922086324296e-05	4.31608410335812e-06	0	0
14	11	1.19767519705399e-05	0.142049699221326	0.205282169160764	0.143731627387385	0	0.100520106982158	1.19767519705399e-05	0	0.0836094777638954	1.51893273693617e-05	0	0	0
14	12	0.000288749161239859	0.110069460527932	0	0.0955739099885021	0.0709014113967074	0.0983875128099677	0.000288749161239859	0.0944624671153935	0.0630594678647851	8.49587355328941e-06	4.26285624170905e-06	0	8.98640609064918e-06
14	13	1.60936679346174e-05	0.136981750030346	0.114054159235091	0	0.0920662409765451	0	1.60936679346174e-05	0	0.0988062981592839	1.54863487840614e-05	0	0	1.06129960355045e-05
14	14	2.10395649024963e-05	0.149594701602455	0.139970173538517	0.097422337672761	0.118612513560026	0.12345313805317	2.10395649024963e-05	0.0705896311737144	0	1.40757443962096e-05	5.66523770506431e-06	0	1.30784431985872e-05
14	15	0.0935409308825811	0.110470599085538	0.158430806881288	0.108112674577684	0.0830554772424818	0.0943225686682956	0.0935409308825811	0	0.098082585178692	1.30757621780742e-05	1.78816023352157e-05	0	1.30542338185255e-05
14	16	1.57201560702313e-05	0.104281310566219	0.145811378248333	0.127838566816155	0	0.0877098296035883	1.57201560702313e-05	0.0807220607960926	8.65322877954165e-06	1.70986352523437e-05	8.88941445559119e-05	0	7.87871195915529e-06
14	17	0.000302400145813718	0.122565279998535	0.131768204310595	0	0.116137268965845	0.121789297827723	0.000302400145813718	7.70966630276936e-06	0.226568344183647	1.45838923830254e-05	1.00120444898533e-05	0	0
14	18	1.68762184915839e-05	0.128499641062457	0.165921648791298	0.146321458110158	0.0868353193523874	0.141464199318201	1.68762184915839e-05	0.000314298238252808	0	9.75213010934281e-06	0	0	1.13489059137917e-05
14	19	1.24113827277389e-05	0	0.146455452329739	0.0859534730996922	0	0.131733759573869	1.24113827277389e-05	1.07577431549362e-05	0.0349131601445374	1.58390102436675e-05	0	0	1.91756760336452e-05
14	20	1.94655902794884e-05	0.118225559360167	0.0881616853267836	0.107895840310745	0.0744276707560261	0.105883823318899	1.94655902794884e-05	0.200009755822044	0.113040994316399	1.56383659163879e-05	0	0	2.00666169018328e-05
14	21	1.61982092157432e-05	0.130795591931876	0.174233209783247	0.120296020528513	0.0667003924454257	0	1.61982092157432e-05	0	0	1.54265994689115e-05	2.58591575819101e-06	0	1.88975187617857e-05
14	22	1.6077403049774e-05	0.116993458008264	0.141063247930404	0.123015287616933	0.12313230677844	0.0976807247478382	1.6077403049774e-05	0.0826293016832625	0.0632639743232407	6.20134271316793e-06	0	0	2.24973644846445e-05
14	23	1.61740064313219e-05	0.115153678518877	0.125964125913523	0	0	0.0947193363274644	1.61740064313219e-05	0	0.0947369516713139	1.67138833877905e-05	4.59959597164256e-06	0	2.94193569559752e-05
14	24	0	0.162170745134661	0.148765131633439	0.10848951440715	0.0899975639181486	0.103522896017236	0	0.0613160394533716	0	1.40981740105827e-05	8.87327192806418e-06	0	2.26341733085071e-05
14	25	4.45788149004331e-06	0.137870214710896	0.157878680192835	0.150644192589052	0	0.164142140327437	4.45788149004331e-06	0	0.0331524279803808	9.03213452595726e-06	0	0	2.40275584819043e-05
14	26	1.44108732994929e-05	0.140035839617712	0.136501116574634	0.145145658950277	0.0978047498456834	0.129722447170518	1.44108732994929e-05	0.131124278017754	0	1.16827070204772e-05	0	0	2.53761145248749e-05
14	27	1.62430743550927e-05	0.159433506185529	0.138475015050228	0.1167639663581	0	0.123669279809653	1.62430743550927e-05	0	0.114135739667654	1.00846200442814e-05	0	0	2.55324775937011e-05
14	28	8.60168437967645e-06	0.137860296829175	0.157820564938344	0.111633310177191	0.0936388484170157	0.100455787848819	8.60168437967645e-06	0.0927989790143332	7.42771532945986e-06	0	0	0	2.39873725051854e-05
14	29	1.46178296341468e-05	0.108584613060329	0.147147784883929	0	0.0692327231290795	0.126459695899433	1.46178296341468e-05	0	1.23537623352191e-05	1.20362024565129e-05	0	0	2.66952521626485e-05
14	30	1.84926972292202e-05	0.113709909739334	0.197084905552612	0.125671583246854	0	0.112099115343739	1.84926972292202e-05	0.0574362814253728	1.37353082100237e-05	8.76096325316831e-06	0	0	0.0422694414824789
14	31	1.27389346396981e-05	0.150445045929163	0.142572511938108	0.108379934155078	0.10463327531168	0.129809907439937	1.27389346396981e-05	0	0.124734144883363	0	0	0	1.49556862977345e-05
14	32	8.04731175325155e-06	0.124800285472072	0.157323843545566	0	0.11039936681727	0.111770434937762	8.04731175325155e-06	0.0827511514264366	0	0.0926622317970397	0	0	0.0928919264385576
14	33	0	0.122350381450299	0.151215604151275	0.0950221574697991	0	0.0805396929905727	0	0.0680467274358661	0.082331113253041	0	0	0	2.17312212434648e-05
14	34	0	0.0967669535408768	0.163266690038307	0.148405589329627	0.071694416222603	0.168252447685708	0	0	6.65561834233448e-06	4.81221069470025e-06	0	0	2.47281265286696e-05
14	35	0	0.113744226483949	0.185769761046174	0.0955609156236911	0.101301678593693	0.133672006136127	0	0.0987502362895124	0.0695021858118629	1.43088332765857e-05	9.43960821613096e-07	0	2.70301398109355e-05
14	36	0	5.4501048240916e-05	0.18004524308343	0.0804341663352796	0	0.114141533059217	0	5.8828823991158e-06	0	6.25058208744072e-06	0	0	0.243300763145859
14	37	0	0.159314639087912	0.135104297782534	0.179216318647284	0.0839015552287198	0.119899789473684	0	9.08947129953063e-06	0.0678993645162527	0	0	0	0.0905868826953827
14	38	0	0.0916472168589459	0.162840913952654	0.118782968443363	0.101399640092548	0.0596897614212797	0	0.149077211998153	0.0859258952082756	8.27320779360148e-06	0	0	1.84178146584678e-05
14	39	0	0.148676603534266	0.20059008570352	0.139993392715785	0	0.089308423220944	0	0	0	8.97519435558086e-06	0	0	0.222291115921236
14	40	0	0.153223339142368	0.147649687573198	0.117885129033547	0.099469727166076	0.101150981426856	0	0.129608672783982	0.0581014963910126	9.66815040855105e-06	0	0	0.0398396255874428
14	41	0	0.124485256876085	0.155888503398129	0.164007849725552	0.0777195166453987	0.0647591204487579	0	6.17323581462892e-06	0.103293921764619	0	0	0	0.180384192567864
14	42	0	0.111043935711855	0.132372967912162	0	0	0.149386673132859	0	0.143110630043355	0.0730301195026548	5.52077162896116e-06	0	0	0.164438259103359
14	43	9.49161666956616e-07	0.115504310486949	0.187930165409613	0.131090447545246	0.110010346099887	0.100189002700514	9.49161666956616e-07	0	0	5.94114934949748e-06	0	0	0.17034389050877
14	44	0	0.159883803203565	0.143871887330323	0.12459479656082	0.0897795341766219	0.105345372998189	0	6.87713449280043e-06	7.00805225027843e-06	0	0	0	0.183041387486526
14	45	4.26526720541576e-06	0.128886803794926	0.182591882649042	0.113880593080229	0	0.0928273376011921	4.26526720541576e-06	1.14215488113299e-05	8.75329452400386e-06	4.63474286561971e-06	0	0	0.0529234188788705
14	46	0	0.0821188989448509	0.142600512014896	0.100286059484431	0.0647612316663549	0.109429760600729	0	0.107495087528467	1.38180903719334e-05	0	0	0	0.110249842465608
14	47	6.03252011132059e-06	0.0884999471592711	0.200429582109953	0.214027407814932	0.125894345371754	0.0742834826060331	6.03252011132059e-06	0	8.26991001303319e-06	5.3001726283048e-06	0	0	0.174105594614936
14	48	7.78838035761888e-06	0.163456312135349	0.182260484338947	0.173463004397971	0	0	7.78838035761888e-06	0.145453559497253	1.35158879305475e-05	0	0	0	0.147065589286922
15	1	2.66850387036831e-05	0.0611607029415075	0.0739584065830274	0.0439749617842339	0	0	2.66850387036831e-05	0.0769080810551202	0.0712807669750458	0.0182551941965981	0	0	0
15	2	0.0195562839344632	0.0724236066447569	0.0360298931222039	0.0317448439814367	0.0390833500492305	0.0314212217291698	0.0195562839344632	0.056610580996706	0.0542050589381725	1.27902752978557e-05	0	0	6.15595243663475e-06
15	3	0.0429644590980145	0.0702910356063011	0.0811266831262855	0.0380430808736139	0.0217727998412078	0.0306879033970138	0.0429644590980145	0.091329133969103	0.0973599899268296	0.0422373817475314	4.05097914190405e-06	3.98471939818463e-06	0
15	4	2.64078652964493e-05	0.0690800001542394	0.032563258576741	1.60683612354343e-05	0.0319701238288673	0.0244846757572218	2.64078652964493e-05	0.0579769252704633	0.0932142314024454	0.0164574806104145	0	0	6.22945059959796e-06
15	5	0.0187560113210409	0.073095658555322	0.0899925801155376	0.0486669981368989	0.0418928369243068	0.0161976695595813	0.0187560113210409	0.0928921596956537	0.0173695459026879	0.038734638663518	4.61724429914453e-06	0	0
15	6	3.82054528472204e-05	0.0554162700783772	0.0435950717095108	1.5084184836068e-05	0.0307066721830151	0	3.82054528472204e-05	0.0630481082654704	0.0952281625907034	0.0373965984479462	0	3.43756015741687e-06	4.93759131474329e-06
15	7	0.0248751872564933	0.0649874970469854	0.0873501603217803	1.60097400105937e-05	0.0316742439321462	0.0256505288180062	0.0248751872564933	0.0825957753485707	0.0524823157823418	9.79677568551171e-06	4.96378176650667e-06	0	5.91839247010736e-06
15	8	0.0528142507117894	0.0722521970269447	0.086555507957953	0.049784583828229	0.0323980453770585	0.0167016839615813	0.0528142507117894	0.0745798792076642	0.0585107504249459	1.42013178807528e-05	0	3.88471109804932e-06	0
15	9	3.64765438114653e-05	0.0658531949671194	0.0619911356535654	1.35202935106818e-05	0.0477705611909795	0.0262803868284835	3.64765438114653e-05	0.0607640858541223	0.0596167267937363	1.26691971280602e-05	4.83987280761548e-06	0	7.68612331839987e-06
15	10	0.0248649376882231	0.0647473836911596	0.0645450626660335	0.0472777193113298	0.0225587672375714	0	0.0248649376882231	0.0704906287959148	0.0178567985473197	0.0159613891268604	0	0	6.27225474317995e-06
15	11	0.0303318515639363	0.0548723983768229	0.0470221179421314	1.31087713415149e-05	0.035988857054061	0.0154120181744492	0.0303318515639363	0.0511262121276415	0.0536641423454005	0.0622278646737349	6.19049770915115e-06	4.64522770224832e-06	0
15	12	0.0582259103521285	0.0827970641321272	0.0623474884305213	0.043762342280063	0.0316662663346014	0.0187897406587122	0.0582259103521285	0.0629200664006186	0.0545740545907027	0.0467261862917409	0	0	7.79466969333584e-06
15	13	4.52894418963242e-05	0.069998538337995	0.0850819102437975	0.0145347365892992	0.0327582897782615	0.0187317048391311	4.52894418963242e-05	0.0503168705215124	0.0143367244349892	9.55207456763199e-06	0	4.80167405580216e-06	6.4628332158166e-06
15	14	5.40275341850409e-05	0.057610481616625	0.0748082979414064	1.6050565702721e-05	0.0353501865358768	0.0244914835288303	5.40275341850409e-05	0.0651800921946998	0.0543371532667563	0.0483285451627609	3.41302869105639e-06	5.93030468570558e-06	0
15	15	0.0837241428782301	0.0495332299487062	0.0796725760197182	1.48324753260584e-05	0.0261365296177114	0.0221058670906985	0.0837241428782301	0.0343365199603925	0.042088207446696	0.0117550265071446	0	0	0
15	16	0.0144433091167929	0.0607027548790101	0.0860487276744029	1.58888290414936e-05	0.0382627131550225	0.0253477406900045	0.0144433091167929	0.0851103113335044	0.0351303441436221	0.0672696230833036	5.23484564551508e-06	0	0
15	17	4.14311283049772e-05	0.0618015815861731	0.0376019754726859	1.40079685313167e-05	0.0316814910022415	0	4.14311283049772e-05	0.0508016433364316	0.0551594118718384	0.0352292891648168	0	4.30375007276865e-06	0
15	18	3.71955418513803e-05	0.064121205994473	0.0705156584233409	0.0438423599367271	0.0348147129028416	0.0275046068739359	3.71955418513803e-05	0.052917974109015	0.0253324331464446	0.0468212169575884	3.84098034122193e-06	0	0
15	19	0.0498224890396597	0.0605868628552928	0.0973726919291164	1.3565778425165e-05	0.0352817918393164	0.0173749211989219	0.0498224890396597	0.064719723952175	0.0367183297235205	1.09271465290268e-05	0	5.03702211126268e-06	1.85499951126921e-06
15	20	0.0443664295644242	0.075137753886515	0.0627680046178547	0.023142425811594	0.0216951706208475	0.0239293913880533	0.0443664295644242	0.0371799588983324	9.67464179670866e-06	1.44852380943394e-05	0	0	0
15	21	2.38312862716849e-05	0.053977641560177	0.0400363499453349	1.55996749032929e-05	0.0375124447508244	0	2.38312862716849e-05	0.0528700642138235	0.0833018408810986	0.0214499954208246	3.381732691728e-06	0	0
15	22	0.0751476053221899	0.0620014219427429	0.0616725090992406	0.0207740875318327	1.363412020431e-05	0.0215011016920506	0.0751476053221899	0.0502071258730849	0.0183686421890924	0.0415752764029236	0	3.57259859758784e-06	0
15	23	0.0284369925831827	0.0578878187923441	0.0588339894767304	1.57326457123537e-05	0.0257647433177793	0.0220992774470984	0.0284369925831827	0.073547776915622	0.039934705641439	0.0151651911054263	0	0	0
15	24	0.123530575744223	0.0688187960039537	0.0709679747840496	1.43038313705724e-05	0.0392525625310678	0.0219929671418457	0.123530575744223	0.0563917992953151	0.0379291509438701	1.15771425532137e-05	4.11911322096611e-06	4.05167998757341e-06	0
15	25	0.116717955405287	0.0581973777593548	0.0758433063677816	0.0299997361590016	0.0381966761385735	0	0.116717955405287	0.0586434784302655	0.0502732913451372	0.037591129086992	0	0	0
15	26	0.11258063737401	0.0734770456924465	0.0736476713040293	0.0404983523517466	0.0272887720407429	0.0301155657793855	0.11258063737401	0.0519965378235548	0.0237744383919108	0.0348314179531396	0	0	0
15	27	0.118876620717981	0.059776502734766	0.0845798579861382	1.47952193650037e-05	0.0366841691610466	0.0230902954158087	0.118876620717981	0.056494183177308	0.0443125033527885	0	0	3.06045032175253e-06	0
15	28	0.127437086278413	0.0540110334125898	0.0344316863128249	0.0505216331590766	0.0238973392692211	0.0203865862512087	0.127437086278413	0.0508904576021793	1.1440063786924e-05	0.0122517764884987	0	0	0
15	29	0.100599009171591	0.0420114374712731	0.0697144533877624	0.0359703860391335	0.0377092553834597	0.0210387803127649	0.100599009171591	0.0401657190024577	0.0510074376528439	0.0310256274747264	0	0	0
15	30	0.12107646700978	0.0697861419835349	0.077639642978254	0.0452175736952046	0.0523517398397945	0.0245802592372989	0.12107646700978	0.0462145362600027	1.06556870440589e-05	0	0	3.26155626565315e-06	0
15	31	0.0985346204452329	0.071404856781231	0.0734182767015997	0.0220818822916596	0.0267424510570072	0.0253999971996734	0.0985346204452329	0.0409550895499098	0.0423422406309816	0.00964612379749252	0	0	0
15	32	0.100129923189969	0.0722440837931982	0.0655713253094991	0.0456948532563699	0.0342924654034948	0.0330572835349273	0.100129923189969	0.0545346302899362	0	0.0144643119822226	0	0	0
15	33	0.1134884309204	0.0666063677712802	0.0652023111900124	0.0566221102612045	0.0627671776596993	0.0250022408679757	0.1134884309204	0.0478956657586581	0.0421743467166377	0.00953208586151244	0	4.4964150097411e-06	0
15	34	0.131031419570957	0.0791110050297449	0.0475410261288547	1.70089722285832e-05	0.0518631403896231	0.0283121423610307	0.131031419570957	0.0479806937770749	0.033193506369962	0	0	0	0
15	35	0.084940761466976	0.053666769102113	0.0665551556584785	0.0532728489955379	0.0423429395817417	0.0274311892435504	0.084940761466976	0.049122379203312	0.0440856826944528	0.00962189964296739	0	0	0
15	36	0.101772589804559	0.0838596504195195	0.0573278484187662	0.0436028717636246	0.0516308367951215	0.0321609173370602	0.101772589804559	0.0492139634592387	0.034513755196628	0.0150969027702649	0	3.30459983879307e-06	0
15	37	0.136808711912262	0.0514016247690112	0.0743439845052332	0.0266240152390646	0.0520081772332924	0.0267894106551798	0.136808711912262	1.06708553364672e-05	1.01465465753621e-05	9.84886910113289e-06	0	0	0
15	38	0.0887725585302455	0.0668291988782246	0.0512657514646686	0.0667012925000372	0.0548210225803509	0.0263071472642992	0.0887725585302455	0.0246831830478749	0.0459617792599144	0.0120808024527621	0	3.83140734775416e-06	0
15	39	0.121549051724898	0.0570167532612987	0.0910102617339662	0.0536768064881497	0.0268285924604768	0.023807854202153	0.121549051724898	0.0458109519195454	0.0152155796544724	0.00904976693306538	0	0	0
15	40	0.0966820472439885	0.0587976502242563	0.057666366399327	0.0314035411078983	0.0538900560600213	0.02129043365151	0.0966820472439885	1.43871643520225e-05	0.0510063461690373	0	0	4.98503492390334e-06	0
15	41	0.0981466083093442	0.059257446982663	0.093365470090457	0.0552249341462926	0.0170030374165486	0	0.0981466083093442	1.50039310261634e-05	0.0233197875539243	0.0116656009341381	0	0	0
15	42	0.102799612239991	0.0594540312781421	0.0773156924187906	0.0544319345618683	0.0589155926556062	0.0217255156582723	0.102799612239991	0.0444677903461526	9.15291593366131e-06	0.00997431259741101	0	0	0
15	43	0.0925942545422757	0.0633655671201531	0.0934637912134538	0.0589492034049906	0.0474106050931107	0.0332134217880993	0.0925942545422757	0.0363227665949831	1.41009515286697e-05	0.0129709409917594	0	4.02347294012863e-06	4.07587518720079e-07
15	44	0.0741473541885212	0.0626843126984278	0.0754011182040168	0.0531156622181733	2.05572970553677e-05	0.0257159417313293	0.0741473541885212	0	0.0410068374437295	0	0	0	0
15	45	0.0949837823343488	0.048494326407245	0.0805692300693654	0.0532024475213348	0.0322331169822355	0.0217400247330011	0.0949837823343488	0.0284909640537439	1.0242490977056e-05	0.0403815360234462	0	4.7828811107236e-06	0
15	46	0.0744006746640432	0.0426630168389794	0.0802379482991499	0.0395203584128083	0.0395237127880644	0.0279578694778676	0.0744006746640432	9.91988699015729e-06	1.3896482375703e-05	0	0	0	0
15	47	0.0589089675561918	0.0495191016065734	0.0867882485649711	0.0518000849356481	0.0472375999639455	0.0277497870833404	0.0589089675561918	0.0120480224530067	1.18172160263781e-05	0.0226821748023305	0	5.14253301505672e-06	0
15	48	0.0992730492871937	0.0510894297473574	0.0557592950907526	0.0490812982619914	0.0233504013432426	0.0355590932756583	0.0992730492871937	1.2575326200805e-05	0.0127546160858881	0	0	6.21988796935222e-06	0
