# Supplementary material for: Two central pattern generators from the crab, Cancer borealis, respond robustly and differentially to extreme extracellular pH
Source: eLife journal article supplement (doi:10.7554/elife.41877), 2018-12-28
Supplement: supp [file elife-41877-supp-v1.zip › elife_poa_e41877_Figure_7_source_data_5.csv]

bin	CG1	CG2	CG3	CG4	CG5	CG6	CG7	CG8	CG9	CG10	CG11	CG12	CG13	CG14	CG15
1	0	0	0	0.193164674816928	0.160688518162623	0.215581931791524	0.193321888677524	0.228278516657666	0.269102504165402	0.279075552307039	0.259409616187612	0.298645853937137	0.351629829461775	0.359994378077916	0.402164689973743
2	0.06346857004677	0.0879751980321708	0.0703555983004902	0.154577691853247	0.153391422763093	0.214412857397287	0.213792340067256	0.226828954918354	0.249755503126636	0.282282367385359	0.342984582506041	0.306892374592298	0.313276106306702	0.353680779268123	0.388895321856233
3	0	0.0880899715733662	0.0728195814767374	0.152061189422624	0.160838677198383	0.214642440397285	0.189412859991214	0.226750545872842	0.248378270274187	0.280322741881097	0.298566220290766	0.314142887902115	0.352764813911104	0.328953506861275	0.388677352726087
4	0.0534166347947412	0.0840213985697878	0	0.157894134789912	0.160116086048802	0.214436910759655	0.222865943091217	0.231792194381907	0.250650131425959	0.277038594288855	0.111895999382334	0.30284810221422	0.351932396349888	0.363315670583768	0.388832133666321
5	0	0.0710673462600098	0.0670366194237264	0.156687991902365	0.152557861382876	0.218693607955866	0.200353199568243	0.2300479249386	0.251044048080601	0.285731350417449	0.283661647441906	0.302634374136432	0.280394956115506	0.344375273888424	0.397383385084686
6	0.0589675142067483	0	0.086194784698357	0.154946390050434	0.158170921675784	0.20358182349353	0.218316180947477	0.232388544	0.24769134645486	0.283665283088011	0.275712513735807	0.291131732761045	0.337334775121847	0.34437862299879	0.394101297543576
7	0	0.0798758409927609	0.0743013260557661	0.15147010775198	0.157721953944109	0.222352093679668	0.21617634908713	0.234920921092071	0.252120742314571	0.280883844401274	0.267537085284297	0.298877743868815	0.317062588300088	0.352274863335192	0.386531731984361
8	0.0537177518905963	0.0745577606427475	0	0.153604168202708	0.149431264606906	0.219080547388869	0.212416957995459	0.2302008316539	0.250022196309235	0.281259992667409	0.32840632780072	0.300226128082318	0.302045227407742	0.337269641514218	0.40357134133895
9	0.0564888135202586	0.0839763119619218	0.0684570466260945	0.151418914455279	0.15964155801802	0.217208290354296	0.207391498647673	0.230427776524212	0.251131611118355	0.278508662698506	0.331970646670351	0.309626514326083	0.241454839425231	0.346305105021504	0.376373298450073
10	0	0	0.0725568301372049	0.147471961893245	0.157438414028392	0.223241463262896	0.185397280446269	0.237501280011009	0.249681303077304	0.276215428666225	0.233051819939665	0.312219445819514	0.298445755679025	0.330398222981564	0.390739189623229
11	0.0594215196221742	0.0666609782631882	0.0759169438267758	0.15296883970291	0.162920381750427	0.219486246684612	0.217057673180855	0.230979107670197	0.249386220459979	0.278155765368584	0.295136885356152	0.31068548710352	0.335412613003039	0.318572355593617	0.39344918339771
12	0.066682759439278	0.0821194032547204	0.0995915749511254	0.154881716832855	0.163384543495416	0.211952383758841	0.195353205258896	0.235004438538334	0.250287641070115	0.279117308871476	0.337309718564723	0.292923877238822	0.274886782800483	0.341631560807884	0.387428327147084
13	0	0.0793716306742779	0	0.149003514437114	0.156421057937126	0.221623668381025	0.179700602535785	0.241205886459079	0.24663722079265	0.27869566490178	0.250683668577169	0.305817868779148	0.243827239375054	0.353936792801593	0.384659626938575
14	0.0554054069028489	0.0898836007370454	0.0867500566044118	0.155532847759783	0.15980012561246	0.218797650603041	0.214067242715993	0.231201417639494	0.252313275239257	0.281449848457194	0.329396008514616	0.297880267144709	0.320681893025346	0.32694971132051	0.391260552572685
15	0	0.0851240598047595	0.0760825404264579	0.150309951860125	0.166088402212962	0.220593059813186	0.210006124003367	0.237236822326255	0.25728452652233	0.277963333139684	0.257401590099272	0.298147759661405	0.358475769614944	0.331133649513613	0.394039118102146
16	0.0582408129485634	0.0934410022855668	0.100505138827748	0.148218854031108	0.160668633024413	0.213845048326627	0.210686573849642	0.238672244397195	0.253874553404758	0.273549512211986	0.260969711143984	0.29364960969009	0.323595546238359	0.350114005679913	0.389599236570239
17	0	0	0.112198564531565	0.151705963017476	0.159759721379046	0.213540273666489	0.19548821700838	0.232718878710383	0.257737795246755	0.273819587218091	0.287785436855811	0.302918379191508	0.274699808942787	0.342875357772711	0.901534247541374
18	0.0635171880686774	0.0738576983725457	0.103115532705154	0.152603957631037	0.157634490723738	0.21958754585279	0.21960938950444	0.23734618296133	0.252485497964423	0.272320608130268	0.327645788989678	0.318717125423872	0.345371879140003	0.338702305747067	0.393083697534671
19	0.0588531983476376	0.0716373431142185	0.103389522092273	0.150658459349759	0.164585403926262	0.216219112660476	0.193352350876916	0.238281428323197	0.24665090156915	0.284790263180229	0.327241099914606	0.306053334606792	0.329687475274362	0.33269967994585	0.381948351004638
20	0	0.0878303959921233	0.0726640153989582	0.153690571698189	0.161176459211074	0.221694095094272	0.200441903022741	0.240982553803552	0.254504855499185	0.277883255598546	0.270835201361757	0.299408640270845	0.277116301341977	0.325161315113296	0.391622647230842
21	0.0585672460333869	0	0	0.153715242924656	0.16723073412537	0.220273575271602	0.213974812926357	0.238787999424393	0.251001139025962	0.276706338009794	0.287588491007085	0.307954071822213	0.320774936579685	0.314405231486035	0.383764943526562
22	0	0.0804742184746274	0.0708370316166924	0.157834012282642	0.169267788229263	0.220553912089291	0.179864717756065	0.238763495298276	0.246938356346443	0.272858613487818	0.333285642866935	0.304839227348581	0.334509252114323	0.365120837401196	0.384017529965474
23	0.064338761594649	0.0750782315172409	0.0966888889963209	0.154475004141833	0.162439186829431	0.219405395145179	0.687784103938963	0.235591589199735	0.251775353028473	0.280221072218318	0.241527103265143	0.296057010110362	0.275945073553394	0.328307075986262	0.383456056839234
24	0.0556418932265454	0.0783867382180813	0.0769006574237203	0.155247200116746	0.161966652371572	0.213140988767882	0.234125956502084	0.238629335571192	0.250169867732465	0.275361643088494	0.328409495789707	0.311960909176961	0.305624672503385	0.335404818460823	0.391527460769169
25	0	0	0.109342077783768	0.160840266700426	0.160581286248812	0.217831504932182	0.198824363180627	0.236061234158061	0.242088315228526	0.277866382859324	0.25584507612196	0.300233720168106	0.315181699738925	0.322625976641341	0.390854188615886
26	0.0575244579614138	0.0684631394457225	0.103556760495995	0.161927956388629	0.161519054402848	0.225813796630392	0.197872050316307	0.239739977979387	0.254288672808244	0.273946900436651	0.230940325926145	0.287627849615156	0.342361856303633	0.33588799003548	0.382181041122176
27	0	0.0806309858428116	0.108941480994069	0.155444844283127	0.160271543901349	0.218741436482857	0.196225752097537	0.239276233888426	0.254093129910938	0.276897373883153	0.332312609144068	0.297402517457173	0.33935646947774	0.315635859013845	0.379437382431484
28	0.0568298060967015	0.0783165696715948	0.0729844433658966	0.160708664199978	0.162819512941709	0.216700385812583	0.178513385772236	0.238373111859961	0.251438516604026	0.277381555934286	0.343840434713761	0.291363825503079	0.24260311325212	0.335185059074286	0.382813990178794
29	0.0611929192449285	0.0841349288681248	0.109958259844563	0.161506793783281	0.163969467823782	0.219924465586157	0.207901922670041	0.23738026447394	0.249309372750474	0.278501930635158	0.330531855477722	0.275271277896707	0.240112648560307	0.342222007856777	0.37590867201999
30	0	0.0938177833484689	0.10575687551887	0.153395800167113	0.160765104434143	0.222429631387921	0.146204387886089	0.236728611813457	0.252317594824136	0.272826956500892	0.328423417284322	0.306377513664478	0.243569174614958	0.331879592207998	0.379616438919578
31	0.0582222307614826	0.100011801392565	0.114046412327961	0.155922823179849	0.161353562767342	0.221218659869747	0.671424070717356	0.238608624084869	0.249947734084224	0.272426180448372	0.320455563283644	0.320122900134658	0.259946664508827	0.344056644495877	0.38508058108962
32	0	0.116427582625744	0.106209315194198	0.156160695602204	0.157192826598253	0.217757057570713	0.651341405562866	0.232486304946484	0.248682879436201	0.271455931783951	0.241559172760868	0.316328215924553	0.307911516882357	0.344897329402448	0.393916011790036
33	0.0598296888078396	0.0974290424283997	0.100061738092403	0.156524786844035	0.162208632743435	0.212641337324548	0.208710751944007	0.235135966012568	0.256468414474595	0.281216255255108	0.339416835030735	0.291138646737334	0.342263661288477	0.326711390237616	0.38666541488337
34	0	0.101692260913868	0.103006237027652	0.154598931721382	0.166005803000679	0.221885396674425	0.195730112034536	0.236290325916793	0.249215261877481	0.272984782849195	0.27902341319948	0.310807986002562	0.328216329287175	0.327432726586903	0.377817323296428
35	0.0532536374897088	0.103459263949413	0.101056137695051	0.151155509821576	0.160800520417101	0.22934993696725	0.195746122425149	0.241397165876635	0.246897721728424	0.277215668773585	0.320561221822028	0.301145234641198	0.324460218595751	0.326833308250626	0.380911867004896
36	0	0.112750376304381	0.0726719891631532	0.157572128641885	0.165107774099544	0.221504932170037	0.196520218417076	0.237304504250001	0.248970926486344	0.272707124547412	0.337736485850508	0.303968839051549	0.258172484403176	0.33374987630422	0.377703769314146
37	0.0513188692810894	0.100973995157287	0.0842105263157895	0.152477712311612	0.162882258544432	0.214409126450631	0.218395216416619	0.234616280464816	0.250038503076114	0.279222614815401	0.242459013742652	0.30947171915446	0.266078630048392	0.345020826191116	0.377911467961235
38	0.0585850881031846	0.0995163505363935	0.0980030890573667	0.149486439337655	0.162862772580058	0.218794730764532	0.182947894614011	0.233767459895018	0.246240705362492	0.28309314600351	0.249975195461377	0.300353344365019	0.33743278844204	0.333317055103258	0.386848478474341
39	0	0.0922677758483558	0.1176411075675	0.154811200991815	0.171471880326345	0.224922820377503	0.20716007080239	0.234214954640875	0.249867763197936	0.285356266210422	0.20816000498177	0.301920452489171	0.272919616577762	0.32804934787581	0.384901876993352
40	0.0544939528060573	0.0831690052404791	0.108134294142582	0.156338917759477	0.16495007232915	0.225170769238953	0.203461940127218	0.235143003442775	0.249784739107051	0.282335089262627	0.33148201832673	0.30091566574796	0.336832154966299	0.32801500711454	0.390298779314147
41	0	0	0.105618815358243	0.153342733569747	0.168574292918225	0.227809277010546	0.212140114415484	0.236665592616446	0.246515139122323	0.287233461513898	0.162454756350357	0.29805864430606	0.339581228499058	0.326396419183569	0.388950372501335
42	0.0599559563544619	0.0852081251059775	0.117709791218143	0.157505592802322	0.16949640921857	0.222923352932229	0.197313471364092	0.230701725720195	0.245661963326279	0.284010656932115	0.165775016321076	0.286184105572284	0.32072067196025	0.341101427116329	0.380723301831733
43	0	0.102110313856472	0.10982144131856	0.153765958984468	0.164918355776933	0.220680929308564	0.193349380449413	0.236496271949075	0.247518554763227	0.277830790226282	0.271793731732676	0.296773167684187	0.317695835690559	0.316329487157908	0.379090180012731
44	0.0581399067087058	0.0987403691112473	0.0726214302935937	0.159622524318921	0.168994424671611	0.230680561110418	0.207377674349633	0.237842583100614	0.251462008742634	0.282074376747472	0.337188466460372	0.297112915584267	0.286304414376144	0.353015878344292	0.378221453583496
45	0.0630351685812547	0.0839545268700662	0.0929546855203558	0.156022548378691	0.164095293418794	0.220572477406292	0.187155718199145	0.235530710559127	0.248886154684419	0.279205317737027	0.329717606129147	0.28374501598726	0.216994544693713	0.315752299461188	0.385138104291836
46	0.0808732368623449	0.10414941691949	0.0950034818776112	0.151896801599929	0.166930533698933	0.225118568044957	0.217680730600601	0.231107398019222	0.248896053456975	0.280596837598466	0.27670553001338	0.296254346539931	0.320513395675017	0.352307785090776	0.376956148377436
47	0	0.105404288689698	0.08435074388921	0.154215797249407	0.167370025756175	0.226030839072261	0.214809411182576	0.234276439352618	0.249626047330626	0.287606579076817	0.267694666923841	0.290653179902434	0.168081916402778	0.325206979774327	0.382925038941205
48	0.0648035641960309	0.125155192438623	0	0.157873828305266	0.173962055396477	0.218934964497229	0.194525142297702	0.23514391061499	0.244449471755591	0.285633560989445	0.329360357087253	0.282062345024993	0.239699044946303	0.354172580819894	0.382842520290401
