# Supplementary material for: Two central pattern generators from the crab, Cancer borealis, respond robustly and differentially to extreme extracellular pH
Source: eLife journal article supplement (doi:10.7554/elife.41877), 2018-12-28
Supplement: supp [file elife-41877-supp-v1.zip › elife_poa_e41877_Figure_7_source_data_6.csv]

bin	CG1	CG2	CG3	CG4	CG5	CG6	CG7	CG8	CG9	CG10	CG11	CG12	CG13	CG14	CG15
1	3	2	10	4.29	2	4.33333333333333	2	1.66666666666667	1	2.66666666666667	1	2	1.25	2.5	8.2
2	4	2	10	7.92	2	4	2	2	1.33333333333333	3	1	1.5	1	3	9.66666666666667
3	0	2	8	8.25	2	4	2	1.5	1	2.66666666666667	1.33333333333333	1.66666666666667	1	3	9.75
4	5	2	0	7.755	2	4	2	1.33333333333333	2	3	1	2.33333333333333	1	3.33333333333333	9.375
5	0	2	8	8.58	2	4	1.5	1	1.5	3	1	2	1	3	9.125
6	4	0	5	8.745	2	4	1.5	1	1.33333333333333	3	1	1.66666666666667	1	2.33333333333333	9.375
7	0	2	10	7.755	2	4	2.5	1.66666666666667	1	3	1	2	1	3.33333333333333	9
8	5	2	0	8.58	3	4	2	1	1.66666666666667	3	1	1.66666666666667	1	2.5	9.5
9	4	2	9	9.075	2	4	2	1.5	1.5	3	1	1.66666666666667	1	3.33333333333333	9.5
10	0	0	9	7.92	2	4	2.5	1.66666666666667	1.66666666666667	3	1	1.66666666666667	1	3.25	9.25
11	2	2	8	8.415	2	4	2	1.5	1.5	3	1	1.66666666666667	1	2.33333333333333	9.375
12	5	2	5	7.92	3	4	2	1.5	2	2.66666666666667	1	2	1	3	9.33333333333333
13	0	2	0	8.25	2.5	4	2	1.33333333333333	1.5	3	1	1.66666666666667	1.5	3.25	9.75
14	4	2	7	9.24	2.5	4	2.5	1.5	1.33333333333333	2.66666666666667	1	2	1	2.66666666666667	9.25
15	0	2	9	8.085	3	4	2.5	1	2	3	1	1.66666666666667	1	3	9.625
16	4	2	5	8.25	2	4	2.5	1.66666666666667	1.33333333333333	3	1	1.66666666666667	1	3	9.75
17	0	0	6	9.24	2	4	3	1.5	1.5	3	1	1.33333333333333	1	3.66666666666667	6.91666666666667
18	4	2	8	8.91	2	4	2	1.66666666666667	1.66666666666667	3	1	1.33333333333333	1.25	3.33333333333333	9.375
19	3	2	8	7.755	2	4	2	1.5	1.5	2.5	1	1.66666666666667	1	3	10
20	0	2	11	7.59	2	4	2	1.5	1.33333333333333	3	1	2	1.5	3.33333333333333	9.33333333333333
21	4	0	0	9.24	2	4	3	2	1.5	2.66666666666667	1	1.66666666666667	1	2.66666666666667	9.375
22	0	2	9	7.92	2	4	2.5	2	1.66666666666667	2.66666666666667	1	2	1	3.33333333333333	9.625
23	4	2	6	8.58	3	4	1	1.5	1.5	2.66666666666667	1	2	1.66666666666667	2.75	9.75
24	3	2	10	8.58	2	4	2	2	1.33333333333333	3	1	1.66666666666667	1	3	9.25
25	0	0	8	8.745	2	4	2	1.5	1.5	2.66666666666667	1	1.66666666666667	1	3	9.25
26	6	2	7	8.58	2	3.5	2	1.66666666666667	1.33333333333333	3	1	2.33333333333333	1	3.25	9.625
27	0	2	7	8.91	2	4	2.5	1.5	1.5	2.66666666666667	1	2	1.33333333333333	3	9.5
28	3	2	9	9.075	2	4	2	1.5	1.66666666666667	2.5	1	1.33333333333333	1.5	2.66666666666667	9.5
29	5	2	5	8.58	2	3.66666666666667	2.5	2	1.5	3	1	2	1	3.75	10.125
30	0	2	7	10.395	2	4	4	2	1.33333333333333	3	1	1.66666666666667	1.33333333333333	2.33333333333333	9.625
31	4	2	7	9.57	2	3.5	1.33333333333333	2	1.5	2.66666666666667	1	1.33333333333333	1.5	3.33333333333333	9.25
32	0	2	5	9.24	3	4	1.33333333333333	1.33333333333333	1	2.5	1	2	1	3	10
33	5	2	4	10.065	2	3	2	2	2	3	1	1.66666666666667	1	3	10.8333333333333
34	0	2	5	11.55	2.5	3.33333333333333	1.5	2	1.66666666666667	3	1	1.33333333333333	1	2.33333333333333	10
35	5	2	7	9.57	2	3.5	2.5	2	1	2.66666666666667	1	1.33333333333333	1.33333333333333	3.33333333333333	9.5
36	0	2	9	9.9	2	4	1.5	2	1.66666666666667	2.5	1	2	1.5	3	9.625
37	5	2	8	9.075	3	3.5	2	2	1.5	3	1	1.66666666666667	1.33333333333333	3.33333333333333	10
38	5	2	2	9.57	2	3.5	2	2	1.33333333333333	3	1	1.33333333333333	1	3	9.375
39	0	2	3	9.735	2	3.33333333333333	2.5	1.5	1.5	3	1	1.66666666666667	1.66666666666667	3.25	9.625
40	4	2	4	9.57	2	4	1.5	2	1.66666666666667	3	1	2	1	3	9
41	0	0	2	9.075	2	3.5	2	2	1.5	3	1	1.66666666666667	1	3	10.25
42	5	2	8	9.075	3	3	2	1.5	1.33333333333333	3	1	2	1.5	3.33333333333333	10
43	0	2	5	8.25	2	3.33333333333333	2.5	2	1.5	3	1	1.33333333333333	1	3	9.875
44	6	2	9	9.57	2.5	4	1	1	1.33333333333333	3	1	2	1.33333333333333	3	10.1666666666667
45	2	2	5	8.58	2	3	2	2	1	3	1	1.66666666666667	1.5	3	10.375
46	4	2	7	9.9	2	4	2	2	1.33333333333333	3	1	1.66666666666667	1.25	3.25	9.625
47	0	2	5	9.57	2	3.66666666666667	1.5	2	1.5	3	1	2.33333333333333	2	2.66666666666667	9.625
48	3	2	0	9.24	2	3.5	2	1.5	1.33333333333333	3	1	1	1.33333333333333	2.75	9.75
