# Supplementary material for: Two central pattern generators from the crab, Cancer borealis, respond robustly and differentially to extreme extracellular pH
Source: eLife journal article supplement (doi:10.7554/elife.41877), 2018-12-28
Supplement: supp [file elife-41877-supp-v1.zip › elife_poa_e41877_Figure_7_source_data_7.csv]

bin	CG1	CG2	CG3	CG4	CG5	CG6	CG7	CG8	CG9	CG10	CG11	CG12	CG13	CG14	CG15
1	0	0	0	0.334089894976366	0.0454314647401186	0.11114862913824	0.0762790176154905	0.0217163119464793	2.69102504165408e-05	0.102076884996698	2.59409616187794e-05	0.0839401273691984	0.0600897377273327	0.165172645180129	0.222731255088731
2	0.0778486439622666	0.0314212217291698	0.101227634834745	0.23403411094304	0.0400020893812818	0.0953603572468733	0.0920084857654149	0.0414266475773036	0.0340710973547899	0.116854828466754	3.42984582505242e-05	0.0143655503854999	3.13276106305972e-05	0.193642562838898	0.202820461695138
3	0	0.0306879033970138	0.119139389058275	0.212545048127367	0.0420384050593419	0.0920216585910879	0.0794400000415209	0.0230200904878828	2.48378270273609e-05	0.102246207802264	0.044466519665481	0.0229763905878316	3.52764813916175e-05	0.186462293172054	0.197898869350281
4	0.0780240759456347	0.0244846757572218	0	0.251035201881758	0.0378882745319449	0.0930371503204056	0.0928581623558609	0.0130812229412566	0.13780922728398	0.130442361201972	1.11895999378098e-05	0.0669265574205482	3.51932396354293e-05	0.219969054072387	0.21720670029541
5	0	0.0161976695595813	0.078330949064236	0.222025317645731	0.0370013836998036	0.0986777210108652	0.0545956904060453	2.30047924938224e-05	0.0598508794496459	0.125533671882145	2.83661647443435e-05	0.0603893385857633	2.80394956112176e-05	0.177562580570318	0.257598720736858
6	0.0727541190282854	0	0.0801413249689912	0.235946928162683	0.0367568283977535	0.091014757070369	0.0436584460195818	2.32388543999358e-05	0.0355135840076918	0.121525387670091	2.75712513740875e-05	0.0306826744105796	3.37334775126721e-05	0.115091464184162	0.249003714523706
7	0	0.0256505288180062	0.102610131283013	0.211525883299221	0.0406409364144896	0.100804404507725	0.128708768436957	0.0246835853295341	2.52120742322941e-05	0.11901760227401	2.67537085293179e-05	0.0664531711613337	3.17062588281222e-05	0.21620187929085	0.19533144437851
8	0.0786062606965471	0.0167016839615813	0	0.259846027181793	0.0355661352890901	0.0976762064049282	0.0801709898312497	2.30200831645064e-05	0.0736578140569831	0.124311972541333	3.28406327795847e-05	0.0192424762531146	3.02045227417769e-05	0.134140398148164	0.246811779478043
9	0.067108145573932	0.0262803868284835	0.0813392936601931	0.256799156265402	0.0382576139281617	0.0917234823038586	0.0869117216593004	0.0208912865079631	0.0574843475346002	0.121755295046557	3.31970646665791e-05	0.0213981297440152	2.41454839410573e-05	0.235122925124052	0.20539379585513
10	0	0	0.117758284176081	0.23279481488582	0.0381599227922013	0.0952240426858435	0.107705609835415	0.0295348076164578	0.0822323056203977	0.12180245932095	2.33051819947402e-05	0.018042528984972	2.98445755688933e-05	0.212613834464437	0.184025326062379
11	0.025458555866924	0.0154120181744492	0.100520106982158	0.269723516503808	0.0416716119130604	0.0960235625645389	0.0986253574580667	0.0176806234588455	0.0696442426164658	0.124112092702748	2.95136885357677e-05	0.0178958135989258	3.35412613002144e-05	0.107624667226554	0.206682499392098
12	0.090495839662639	0.0187897406587122	0.0983875128099677	0.294995461965697	0.0367876638134283	0.0976744519066615	0.0707149044434231	0.0172854416816043	0.130415622889358	0.107441634034288	3.37309718558437e-05	0.0529136518916222	2.7488678279657e-05	0.213883783924853	0.20489854071909
13	0	0.0187317048391311	0	0.236708263365193	0.0370290834003565	0.0982261384442851	0.0657254645681206	0.0222790614563479	0.0664585768323763	0.125179560869984	2.5068366858549e-05	0.0292562875734002	0.0337498602717313	0.213364369636212	0.205126329292174
14	0.0662321774657351	0.0244914835288303	0.12345313805317	0.216814345105616	0.0375002328735416	0.100762175055741	0.121455106862505	0.0211462537323066	0.0505879814315492	0.106915221246931	3.29396008525551e-05	0.0563814601172295	3.20681893035991e-05	0.160945044050749	0.201952487329781
15	0	0.0221058670906985	0.0943225686682956	0.254626824986952	0.0383597773751026	0.111033440368018	0.131446239799025	2.37236822299751e-05	0.132200382931248	0.124021681926107	2.57401590056769e-05	0.0477564059823611	3.58475769626844e-05	0.176504783426363	0.200804921428713
16	0.0697771531774135	0.0253477406900045	0.0877098296035883	0.225160743347198	0.0429911791521491	0.103484586539664	0.119826537697347	0.0285345741947127	0.0377594821857377	0.134540454220369	2.60969711152648e-05	0.0619398361910268	3.23595546249101e-05	0.172189479893251	0.233547066152976
17	0	0	0.121789297827723	0.2821209581165	0.0415327347669121	0.110645503866445	0.131817729126539	0.0238003793962849	0.0541305932774194	0.132896562438478	2.87785436865365e-05	0.0100892990239836	2.74699808951906e-05	0.271114258414925	0.130979858130691
18	0.0890396645784343	0.0275046068739359	0.141464199318201	0.251816368605702	0.0387982085168094	0.111167385796717	0.0924442362792147	0.0347582681656207	0.0985618102129261	0.13133608023295	3.27645789000555e-05	0.0106991964284612	0.0407463516639871	0.232649177361149	0.192922558221301
19	0.0452263288022258	0.0173749211989219	0.131733759573869	0.210652736585599	0.0395294735402358	0.105482970408091	0.0864298804243628	0.019663664483414	0.0630806444062418	0.10176166462273	3.27241099925469e-05	0.0313312052144661	3.29687475285306e-05	0.206687627754259	0.202685725863066
20	0	0.0239293913880533	0.105883823318899	0.239457595234365	0.0375186561751569	0.108199443690307	0.0891943333473038	0.0326070294722862	0.0508587707451444	0.131037970648845	2.70835201354793e-05	0.0483923371704748	0.0419716173790187	0.243705331405422	0.188801872030233
21	0.0606358411632868	0	0	0.245298735530687	0.0402607045775569	0.113723173736801	0.139334134048446	0.0440952826017028	0.0537009362809822	0.114766654454819	2.87588491016632e-05	0.052146752107153	3.20774936567436e-05	0.167275691348256	0.198441402898087
22	0	0.0215011016920506	0.0976807247478382	0.209469409400907	0.0416032450877656	0.115146613258176	0.11131232393316	0.0450552992830558	0.0800457558763381	0.111128989393194	3.33285642877999e-05	0.0592937146699268	3.34509252125428e-05	0.220350135478139	0.20914610637291
23	0.0812309034513244	0.0220992774470984	0.0947193363274644	0.228892686068048	0.0346434053751118	0.115219505894648	6.87784103961796e-05	0.0266310847744189	0.062189515217741	0.107138557817252	2.41527103273161e-05	0.0466028306349164	0.0886711347994271	0.154402478237633	0.193560524119518
24	0.0418070928946975	0.0219929671418457	0.103522896017236	0.236857548274116	0.0387900717221833	0.11157917383677	0.084028512433614	0.0497721692393517	0.03771152284639	0.128393776171799	3.28409495800609e-05	0.0556560287138683	3.0562467251353e-05	0.213444194776761	0.200475997779896
25	0	0	0.164142140327437	0.236518621583207	0.0379576738910767	0.12012981554306	0.102207820268106	0.0225262128563018	0.0516635100832403	0.0969566779614057	2.55845076130453e-05	0.0248488576539445	3.15181699749388e-05	0.212782037573134	0.192543319181331
26	0.0991738912592178	0.0301155657793855	0.129722447170518	0.26427853020485	0.037107387558509	0.0892409896514324	0.0893052107013166	0.0361877390437102	0.0466391832139817	0.120012582535975	2.30940325999448e-05	0.0761121966562986	3.42361856217693e-05	0.225289401386629	0.181715269655613
27	0	0.0230902954158087	0.123669279809653	0.23133301726215	0.0394175417737073	0.114785610306628	0.121969013822962	0.0223073735292998	0.0623168223001533	0.101462088087834	3.32312609249548e-05	0.0471870910280889	0.0479489630109084	0.179625429884259	0.199530030670633
28	0.0465561137505383	0.0203865862512087	0.100455787848819	0.272469059582449	0.0438245001033902	0.111014416277539	0.056008434609154	0.0323570604484684	0.0816571291785738	0.0846744974982468	3.4384043462745e-05	0.0391607594154824	0.0310372825394372	0.166470072505646	0.188884744054725
29	0.0942254689825361	0.0210387803127649	0.126459695899433	0.228622557007865	0.0372556270651348	0.0909635087730239	0.119633697506215	0.04183687802302	0.069769470916595	0.122679968337578	3.30531855394752e-05	0.0518443845331425	2.40112648636522e-05	0.244954040723207	0.206456823723866
30	0	0.0245802592372989	0.112099115343739	0.232874298988832	0.0354320362037633	0.113797851049829	0.1395082269209	0.0425844864456017	0.0407085825200182	0.128634330783537	3.28423417388568e-05	0.0498830608338202	0.0210274967099499	0.13328880957199	0.191348859163498
31	0.0662225474904172	0.0253999971996734	0.129809907439937	0.251691493851315	0.0379003383584129	0.090158709151799	0.0293461175055843	0.0449129320313002	0.0510253083513368	0.102502496822128	3.20455563267497e-05	0.0153703413022445	0.0353961271036975	0.261759178178383	0.210730434155388
32	0	0.0330572835349273	0.111770434937762	0.259387600216135	0.0568849019322235	0.122562722380677	0.0235619382194785	0.0153214503809635	2.48682879421129e-05	0.0975205162308746	2.41559172700232e-05	0.0530679232594427	3.07911516853387e-05	0.168659191779942	0.254963849819804
33	0.106216843134332	0.0250022408679757	0.0805396929905727	0.232501698714744	0.03622767603692	0.0711821993612544	0.102502051236333	0.0427668866666429	0.130066343727082	0.122289263695707	3.39416835008048e-05	0.0551732969497303	3.42263661273494e-05	0.228480713329229	0.297956307809046
34	0	0.0283121423610307	0.168252447685708	0.276831031097584	0.0380599984138841	0.0847726311985101	0.0436521236270841	0.0412896046463168	0.0900915998037392	0.128770408315927	2.7902341322142e-05	0.0266894122234911	3.28216329264728e-05	0.149471184947973	0.264596402275151
35	0.0868822444917106	0.0274311892435504	0.133672006136127	0.254923221091015	0.0402416716827583	0.0919988999459319	0.118124043376955	0.0587178322945656	2.46897721737161e-05	0.111824601853359	3.20561221798558e-05	0.0096618115628101	0.0412376922999271	0.210264193991163	0.216552317204851
36	0	0.0321609173370602	0.114141533059217	0.283938672927523	0.0388680211007739	0.116969629271875	0.0571212809551042	0.0498462235637518	0.0866953150183137	0.0931295488471369	3.3773648586001e-05	0.0691132090791303	0.0392342013841472	0.194251455631249	0.24757583919999
37	0.0709652720079696	0.0267894106551798	0.119899789473684	0.243866052237886	0.0591386049439095	0.0953532117247125	0.101579280464019	0.0467652478924874	0.0755736091991312	0.131970582993266	2.42459013819612e-05	0.0455815659386577	0.0188565009698695	0.20182650704871	0.241925957971339
38	0.092014325225742	0.0263071472642992	0.0596897614212797	0.254970050391881	0.0368295228750428	0.0994483489144654	0.0788249499582932	0.0406058901830883	0.0453706901173065	0.119407951975224	2.49975195493161e-05	0.00873260286691279	3.37432788357337e-05	0.176505764417428	0.207041818018483
39	0	0.023807854202153	0.089308423220944	0.257009078831592	0.0416076517611824	0.0857521279105676	0.129413708421633	0.0177051711396477	0.0791775877443153	0.120763371478087	2.08160004960086e-05	0.0451312046284327	0.0939070167102416	0.233881780747335	0.212127685151395
40	0.0627803032697467	0.02129043365151	0.101150981426856	0.286961646936697	0.0393228813069681	0.129296636043245	0.0516344030567795	0.0422848180200283	0.0821794882921392	0.11718704182448	3.31482018243521e-05	0.0716577822915396	3.36832154881747e-05	0.172478490893866	0.188330890205176
41	0	0	0.0647591204487579	0.223330547706893	0.0355368587219451	0.0987300885529694	0.099842326043821	0.0416913208016631	0.0727278690721933	0.122503919766983	1.62454756401922e-05	0.0570262753625914	3.39581228486065e-05	0.175053312474373	0.204769631295984
42	0.0848094989420778	0.0217255156582723	0.149386673132859	0.231964763859186	0.0782768317053183	0.0631452645042639	0.0966770228826536	0.0224544723374857	0.0414578924408371	0.117799568036468	1.65775016279463e-05	0.0485776002681247	0.076902763851334	0.214475377940657	0.21370196512572
43	0	0.0332134217880993	0.100189002700514	0.242630382000772	0.0373358287025524	0.0886628272108245	0.123942865271768	0.0431005952168375	0.0627664603676665	0.114175584845959	2.71793731818947e-05	0.0351217933755444	3.176958357914e-05	0.175749387406712	0.207536788035194
44	0.103162869064863	0.0257159417313293	0.105345372998189	0.272895732118762	0.0604726648359967	0.129188730658635	2.07377674359579e-05	2.37842583109029e-05	0.0432405448649982	0.118430240443645	3.37188466438046e-05	0.0758234811137301	0.0531886031095889	0.207145712628395	0.208645540403602
45	0.0293882562959503	0.0217400247330011	0.0928273376011921	0.227053373753567	0.0397684943600427	0.078392353458903	0.0969944635082449	0.0385826423119735	2.48886154621943e-05	0.117730341690681	3.29717606149576e-05	0.0427186747302791	0.0370363736450399	0.195868739616739	0.209040260153294
46	0.10490471919599	0.0279578694778676	0.109429760600729	0.270522234438634	0.0344865354802242	0.118821293441416	0.0808780774817378	0.0416334821731076	0.0442944878307032	0.124274171455952	2.76705529943921e-05	0.0404835182403119	0.0411645613137558	0.223268446613305	0.209791047060122
47	0	0.0277497870833404	0.0742834826060331	0.234690226728069	0.0370104414910329	0.110723782959546	0.0414139540466626	0.0416948718741401	0.0730607234359626	0.120980393207503	2.67694666856644e-05	0.0757817550736651	0.0858949017393126	0.180023404004086	0.201942134709242
48	0.0561360874848141	0.0355590932756583	0	0.239562917227711	0.0338147443279713	0.0938059268868132	0.042576406973368	0.0211234435993504	0.0446648308552142	0.121983981502968	3.2936035706782e-05	2.82062344954189e-05	0.0210110742082894	0.168020672600805	0.214106545528443
