# Supplementary material for: Two central pattern generators from the crab, Cancer borealis, respond robustly and differentially to extreme extracellular pH
Source: eLife journal article supplement (doi:10.7554/elife.41877), 2018-12-28
Supplement: supp [file elife-41877-supp-v1.zip › elife_poa_e41877_Figure_8_source_data_1.csv]

pH	STG1	STG2	STG3	STG4	STG5	STG6	STG7	STG8	STG9	STG10	STG11	STG12	STG13	STG14	STG15	CG1	CG2	CG3	CG4	CG5	CG6	CG7	CG8	CG9	CG10	CG11	CG12	CG13	CG14	CG15
5.5	0	0	0	0.664583333333333	0	0	0.0604166666666667	0	0	0	0	1	0	0.5	0.495833333333333	0	1	1	0.122916666666667	1	1	1	1	0	1	0	1	0	0.339583333333333	1
7.8	1	1	1	1	1	1	1	1	1	1	1	1	1	1	1	1	1	1	1	1	1	1	1	1	1	1	1	1	1	1
10.4	0	0	0	1	1	0	0.0979166666666667	1	1	0	0.78125	0.70625	0	1	1	0	1	0	0	1	1	0	0	0	0	0	0	0	0	0
