# Supplementary material for: Two central pattern generators from the crab, Cancer borealis, respond robustly and differentially to extreme extracellular pH
Source: eLife journal article supplement (doi:10.7554/elife.41877), 2018-12-28
Supplement: supp [file elife-41877-supp-v1.zip › elife_poa_e41877_Figure_8_source_data_2.csv]

pH	STG	CG
7.8	1	0.907638888888889
5.5	0.209294871794872	0.630833333333333
6.1	0.703611111111111	0.940277777777778
6.7	0.958333333333333	1
7.2	1	1
7.8	1	1
7.8	1	0.907638888888889
8.3	0.980555555555556	0.933333333333333
8.8	0.951666666666667	0.716527777777778
9.3	0.813333333333333	0.365138888888889
9.8	0.729861111111111	0.235138888888889
10.4	0.541815476190476	0.272727272727273
7.8	1	0.933333333333333
