# Supplementary figures and images for: Two central pattern generators from the crab, Cancer borealis, respond robustly and differentially to extreme extracellular pH
Source: eLife journal article supplement (doi:10.7554/elife.41877), 2018-12-28

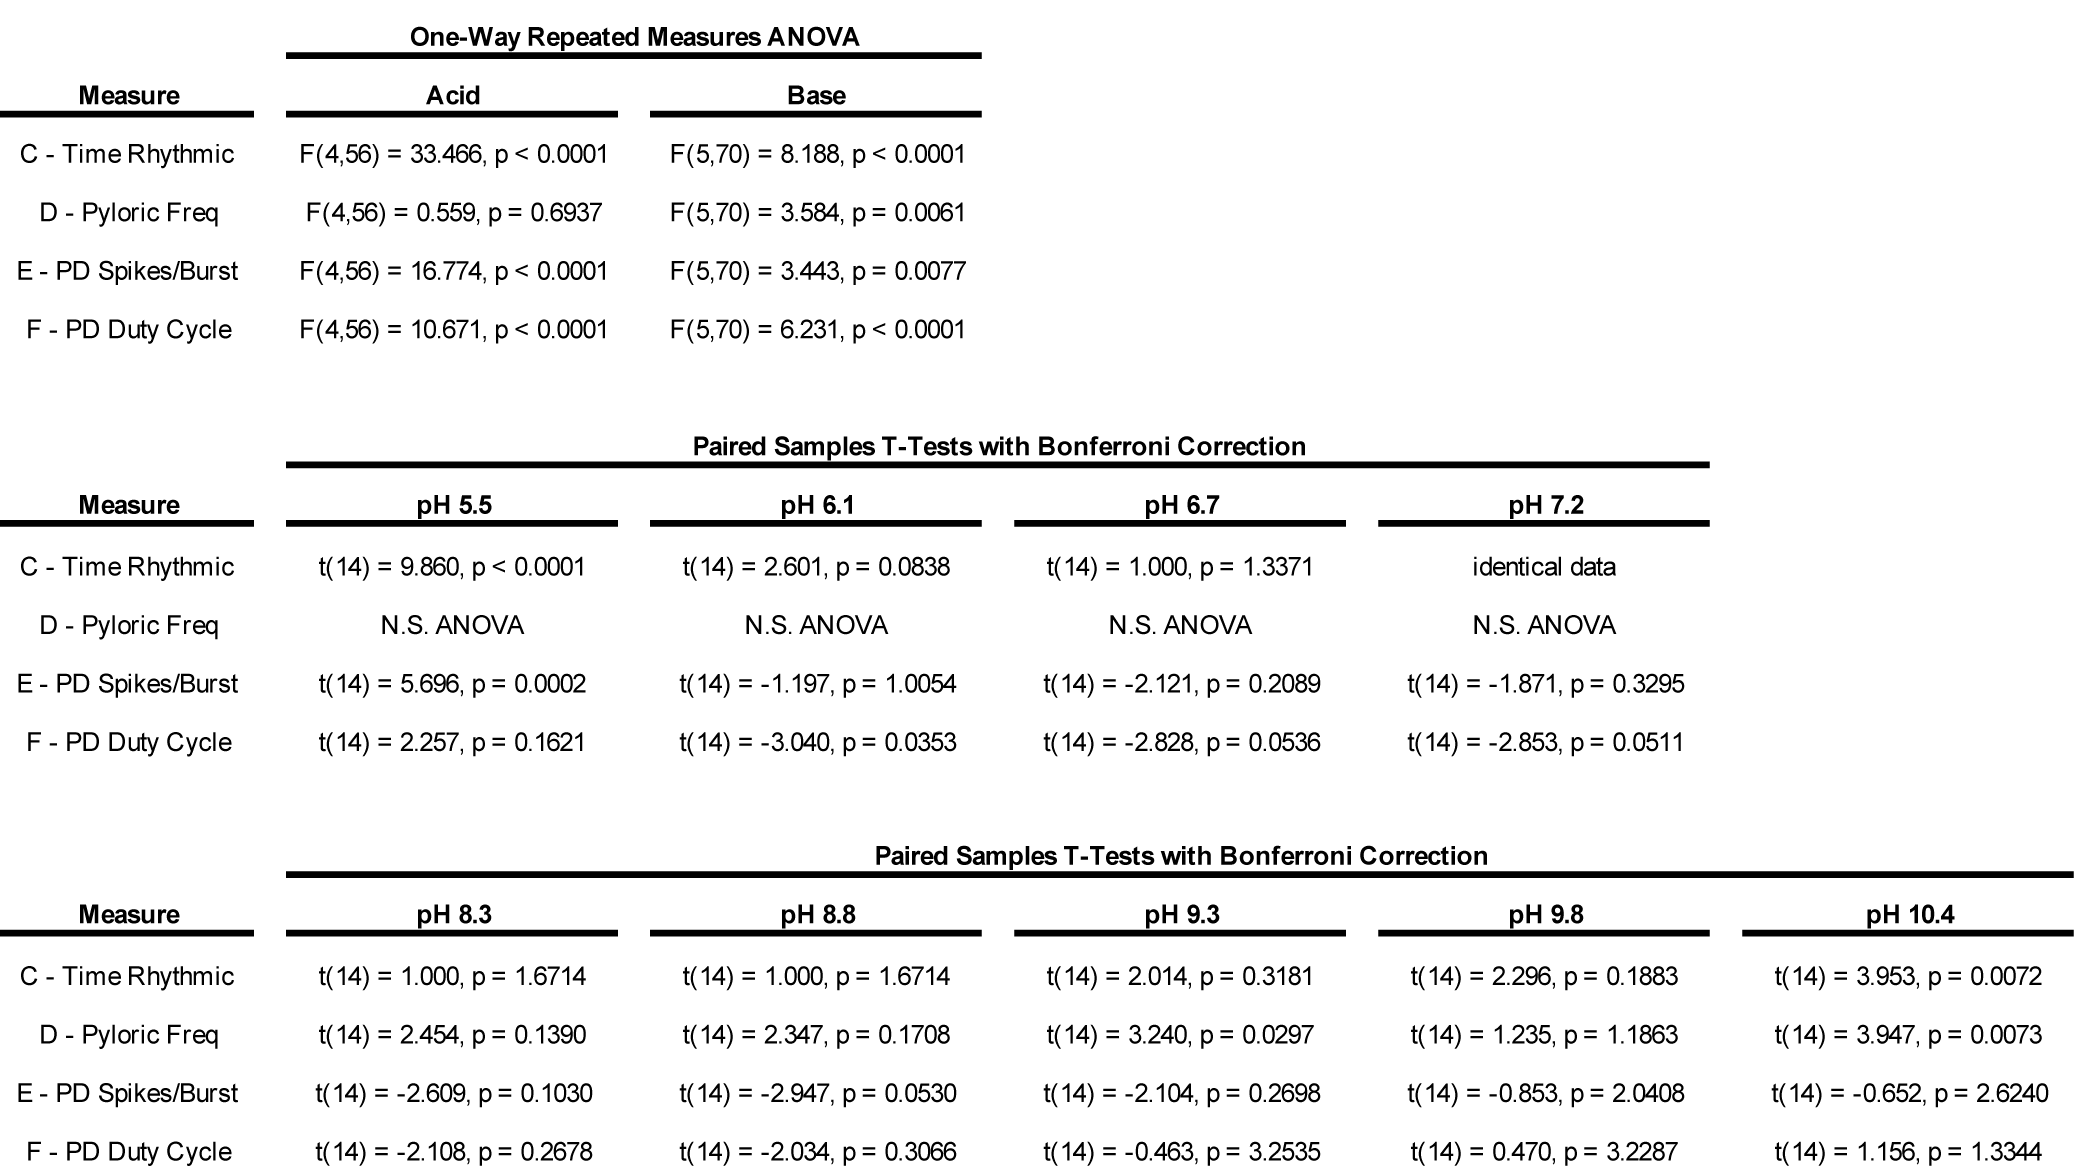

Supplement: supp [file elife-41877-supp-v1.zip › elife_poa_e41877_Figure_3_figure_supplement_1.tif]

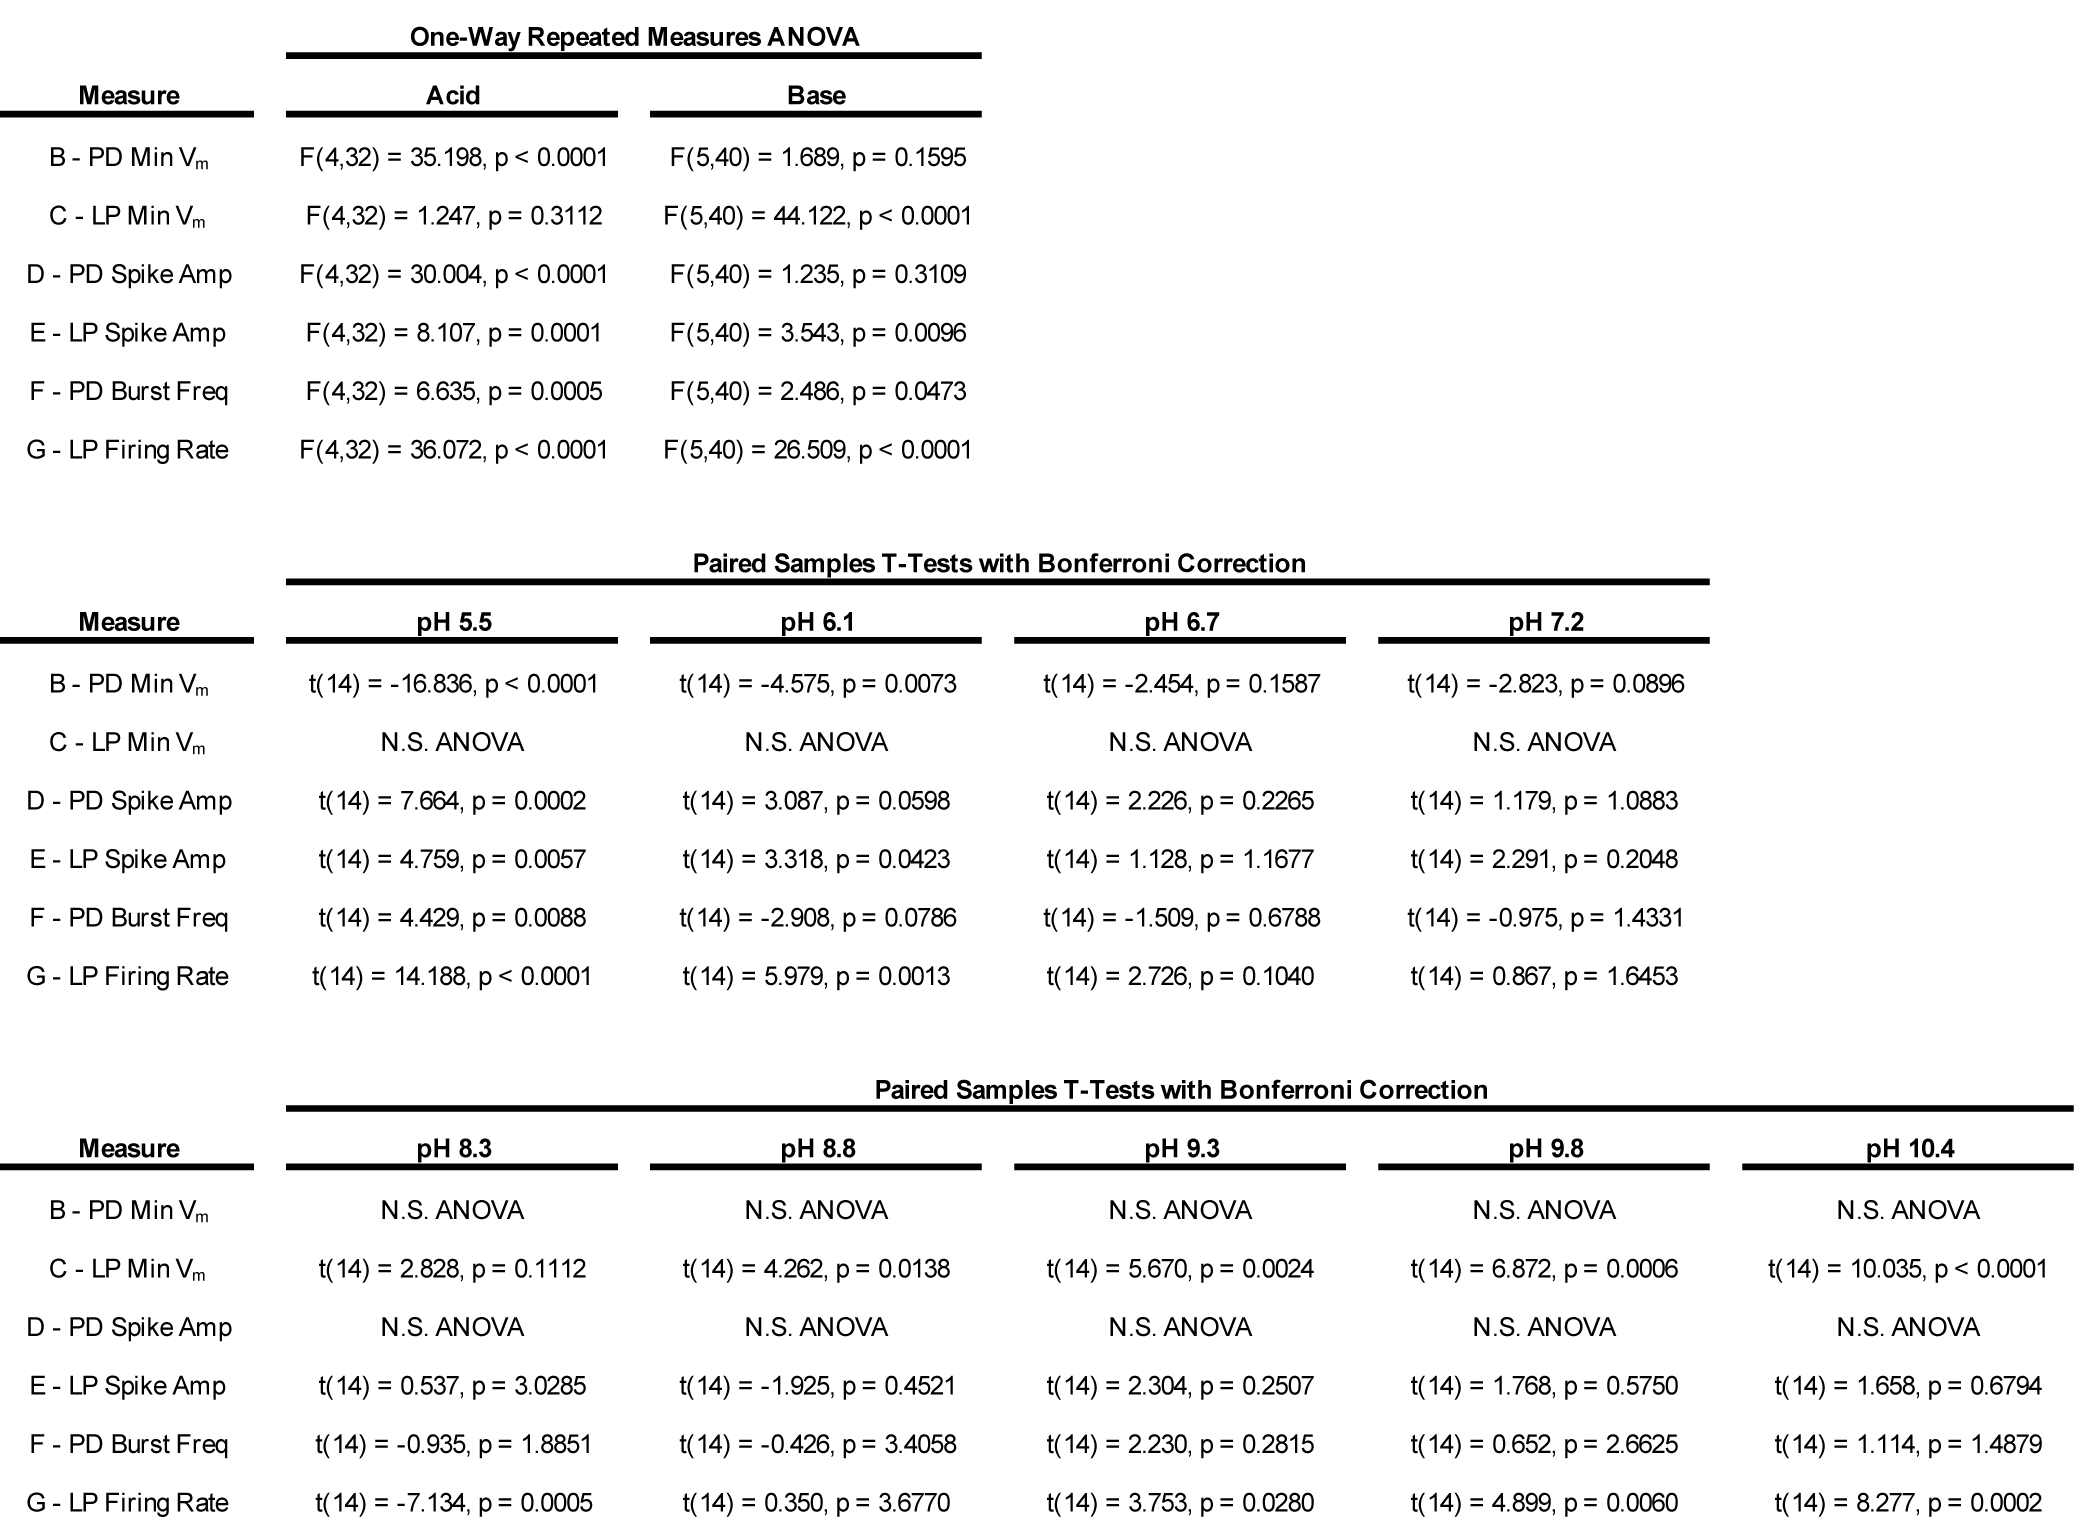

Supplement: supp [file elife-41877-supp-v1.zip › elife_poa_e41877_Figure_4_figure_supplement_1.tif]

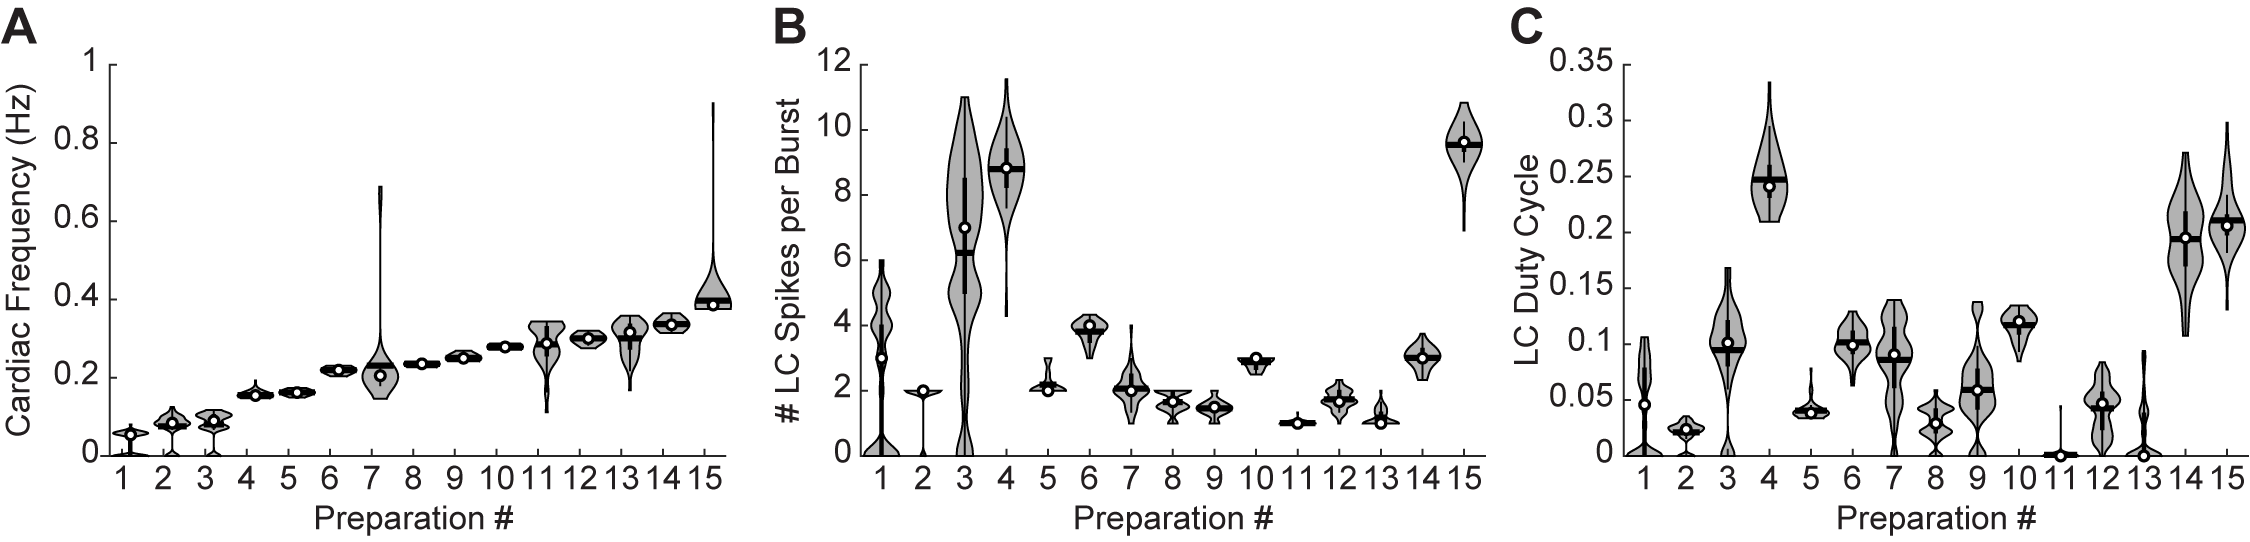

Supplement: supp [file elife-41877-supp-v1.zip › elife_poa_e41877_Figure_7_figure_supplement_2.tif]

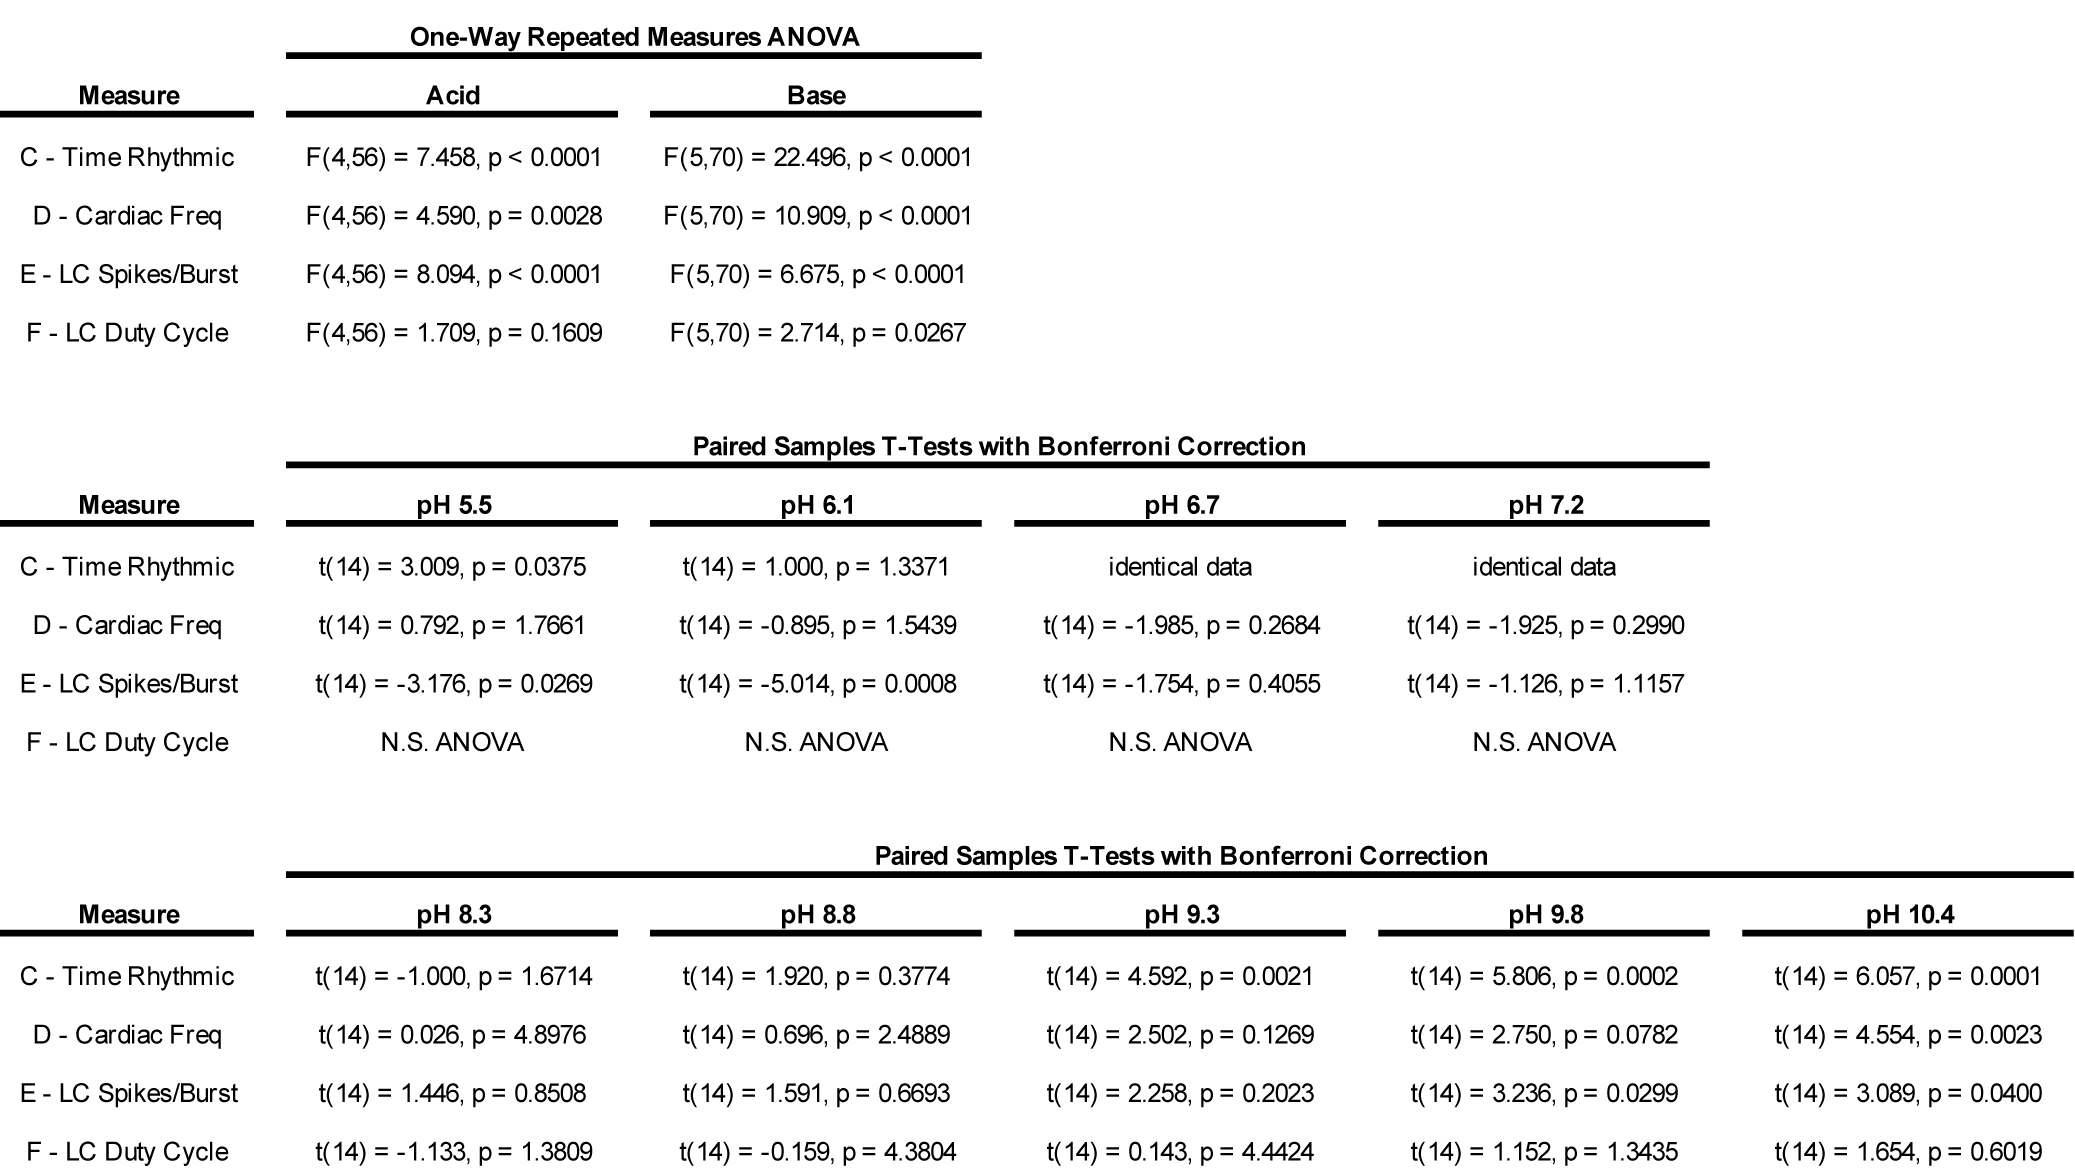

Supplement: supp [file elife-41877-supp-v1.zip › elife_poa_e41877_Figure_7_figure_supplement_1.tif]

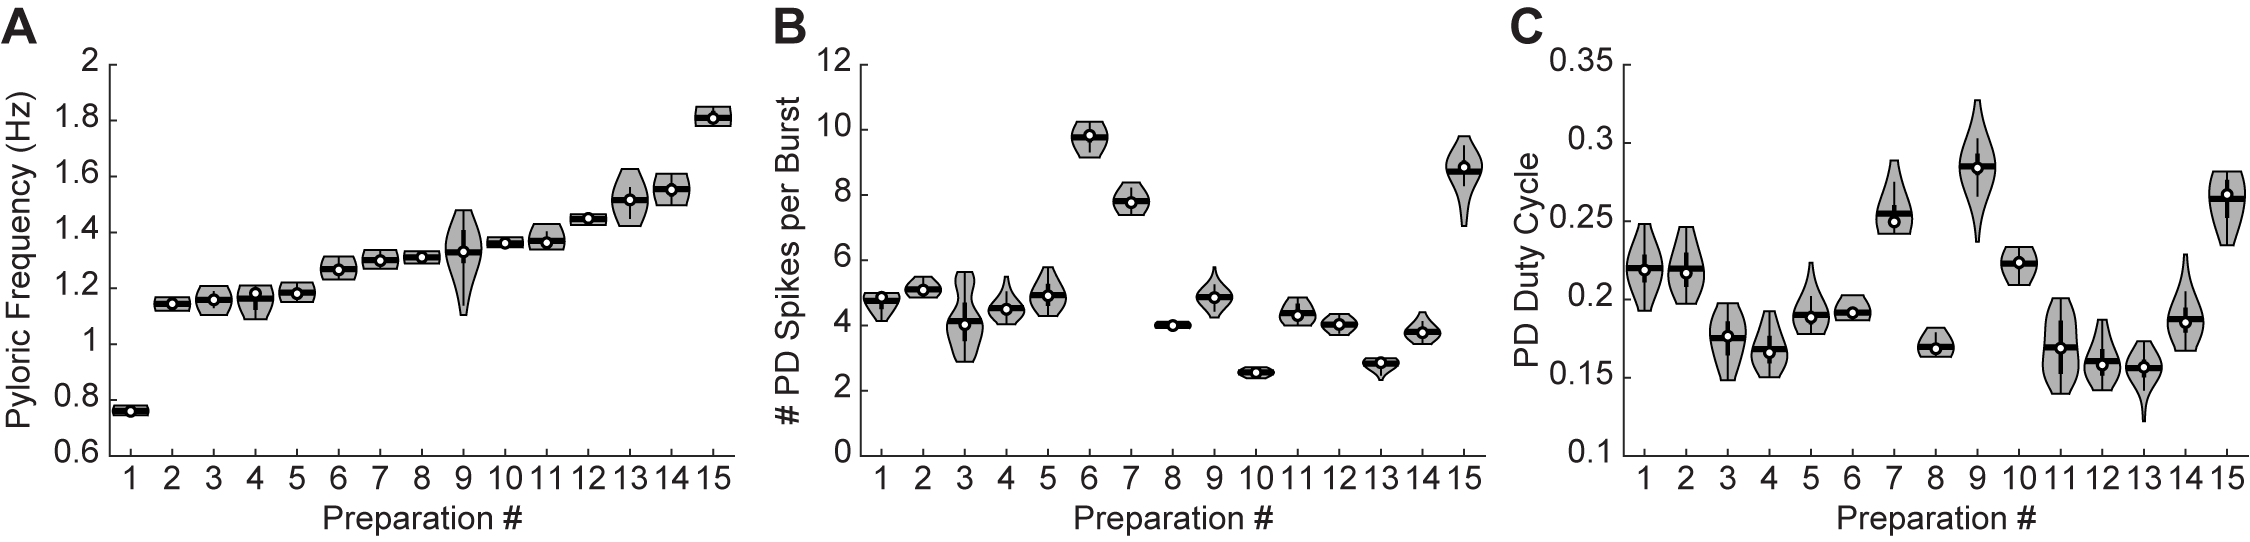

Supplement: supp [file elife-41877-supp-v1.zip › elife_poa_e41877_Figure_3_figure_supplement_2.tif]

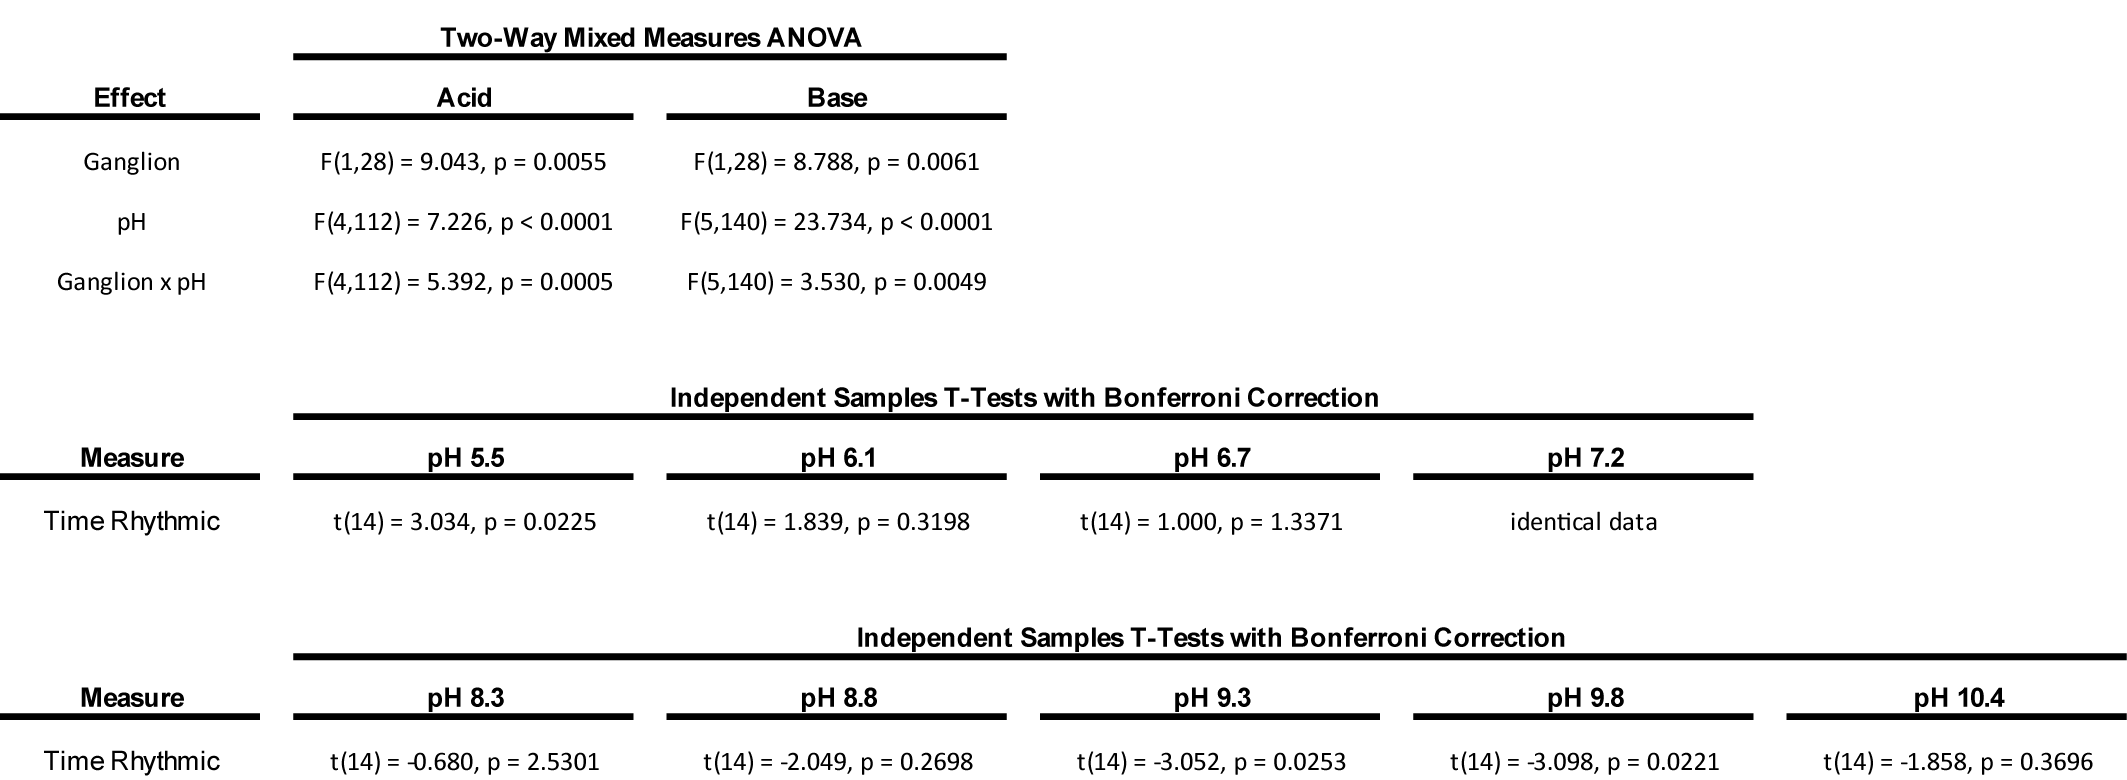

Supplement: supp [file elife-41877-supp-v1.zip › elife_poa_e41877_Figure_8_figure_supplement_1.tif]
